# Supplementary material for: Emissions of intermediate-volatility and semi-volatile organic compounds from domestic fuels used in Delhi, India
Source: Copernicus journal article supplement (doi:10.5194/acp-21-2407-2021), 2021-02-18
Supplement: Supplementary file 1 [file S7 - SPE supplment blank corrected table.xlsx]

## Sheet: Notes
Key
	Wood
	Crop residue
	Charocal
	Sawdust
	Cow dung cake
	Municiapal solid waste
Notes on data processing
These peak tables have been complied by taking peak with unique mass spectra with NIST similarity > 700 and removing all peaks with the same identities as peaks in blank samples. Due to the nature of the large dataset presented, there may occasionally be rogue peaks with inccorect mass spectral assignments, which do not meet the above criteria and are concequently presented in the tables. Users a…
NIST Hit	Descriptor	Ref
>900	Excellent match	S. E. Stein, National Institute and Standards and Technology (NIST) Mass Spectral Search Program, Version 2.0g, 2011.
800-900	Good match	S. E. Stein, National Institute and Standards and Technology (NIST) Mass Spectral Search Program, Version 2.0g, 2011.
700-800	Fair match	S. E. Stein, National Institute and Standards and Technology (NIST) Mass Spectral Search Program, Version 2.0g, 2011.
Notes on sum of cow dung cake peaks by functionality
The peaks for cow dung cake (sample 32) have been manually assigned a functionality. The approach is approximate, intended to give an approximate idea of the types of functionalities present. The absolute number of peaks is not vitally important to the interpretation/analysis provided and should be treated as approximate due to a. Certain peaks may contain multiple functionalities b. Possibility …

## Sheet: Brassica spp (SPE3)
Name	Tailing.Factor	Base.Mass	Quant.Masses	Area	Peak.S.N	Quant.S.N	R.T...min.	FWHH..s.	Similarity
1,3-Dioxolane, 2-ethyl-	1.25	45.12	XIC(45.12Â±500ppm)	86149934	911	4291	3.5 min, 6.472 s	0.106	764
n-Propyl acetate	0.32	43.03	XIC(43.03Â±500ppm)	23633931	544	444	3.58334 min, 1.644 s	0.103	858
Furan, 2,3-dihydro-3-methyl-	1.16	69.04	XIC(69.04Â±500ppm)	8935426	1353	1380	3.66668 min, 1.857 s	0.1	752
Butanenitrile, 3-methyl-	1.05	43.07	XIC(43.07Â±500ppm)	64281050	804	1695	3.75002 min, 1.969 s	0.13	824
Propanoic acid, 2-oxo-, methyl ester	0.49	43.03	XIC(43.03Â±500ppm)	41738152	599	945	3.75002 min, 2.010 s	0.11	927
Butane, 1-ethoxy-	1.01	59.06	XIC(59.06Â±500ppm)	3225695	550	647	3.75002 min, 6.460 s	0.068	747
1-Butanol, 3-methyl-	1.18	43.04	XIC(43.04Â±500ppm)	18272993	360	484	3.83336 min, 1.698 s	0.13	803
Thiazole	1.31	84.99	XIC(84.99Â±500ppm)	7660306	1946	2200	3.83336 min, 2.179 s	0.114	837
1,3,5-Hexatriene, 2-methyl-	1.24	79.05	XIC(79.05Â±500ppm)	16828896	2197	1330	3.9167 min, 1.651 s	0.092	892
3-Penten-2-one	1.26	69.04	XIC(69.04Â±500ppm)	140505230	5339	9007	3.9167 min, 1.961 s	0.109	860
3-Hexanol, 3-methyl-	0.65	45.05	XIC(45.05Â±500ppm)	224675606	1963	4703	4.00004 min, 1.531 s	0.113	822
2-Butenal, 2-methyl-	1.18	84.05	XIC(84.05Â±500ppm)	10930099	2349	2566	4.00004 min, 1.940 s	0.103	798
1-Pentanol, 4-methyl-	0.14	41.05	XIC(41.05Â±500ppm)	7095497	916	311	4.00004 min, 1.982 s	0.211	728
1,3,5-Heptatriene, (E,E)-	1.2	79.05	XIC(79.05Â±500ppm)	11667352	1184	715	4.08338 min, 1.685 s	0.108	843
Furan, 2-methyl-	1.55	53.05	XIC(53.05Â±500ppm)	39442285	2293	3163	4.08338 min, 2.093 s	0.103	821
2-Pentenal, (E)-	2.98	55.06	XIC(55.06Â±500ppm)	23537766	1094	2213	4.16672 min, 2.013 s	0.095	824
2-Butenoic acid, methyl ester	1.16	69.04	XIC(69.04Â±500ppm)	20247688	1969	3138	4.3334 min, 1.946 s	0.098	735
(CH3)2C=CHCN	1.27	41.05	XIC(41.05Â±500ppm)	7078212	339	245	4.3334 min, 2.279 s	0.105	820
N-tert-Butylethylamine	1.16	86.03	XIC(86.03Â±500ppm)	66740775	3894	5802	4.3334 min, 2.417 s	0.124	831
Heptane, 3-methyl-	1.59	57.08	XIC(57.08Â±500ppm)	28483723	866	1905	4.41674 min, 6.488 s	0.088	863
4-Hexen-3-one	0.84	41.05	XIC(41.05Â±500ppm)	16155549	1178	603	4.50008 min, 1.901 s	0.104	898
2,2'-Bipyrrolidine	0.63	70.08	XIC(70.08Â±500ppm)	17168189	140	1356	4.58342 min, 1.551 s	0.05	753
3-Butenenitrile, 2-methyl-	1.21	41.04	XIC(41.04Â±500ppm)	16669617	827	435	4.58342 min, 2.218 s	0.112	805
2(5H)-Furanone	1.2	55.03	XIC(55.03Â±500ppm)	6203946	1477	430	4.58342 min, 2.568 s	0.118	788
Propanedinitrile, (acetyloxy)methyl-	0.11	43.03	XIC(43.03Â±500ppm)	19393889	570	564	4.66676 min, 2.303 s	0.11	743
2-Furanol, tetrahydro-	1.29	42.06	XIC(42.06Â±500ppm)	147008008	2103	1727	4.7501 min, 2.154 s	0.129	864
Butanoic acid	1.11	60.03	XIC(60.03Â±500ppm)	182681034	4808	5241	4.83344 min, 1.806 s	0.101	922
3-Hexanone	2.04	43.06	XIC(43.06Â±500ppm)	58533857	1002	1834	4.83344 min, 1.928 s	0.102	895
Furan, 2,3-dihydro-4-methyl-	0.72	84.05	XIC(84.05Â±500ppm)	18509706	921	2845	4.83344 min, 2.230 s	0.11	834
Cyclopentanone	1.16	55.03	XIC(55.03Â±500ppm)	234018079	6241	8957	4.91678 min, 2.435 s	0.154	933
Propanenitrile, 3,3'-oxybis-	1.24	84.01	XIC(84.01Â±500ppm)	106235344	4399	8891	5.1668 min, 2.823 s	0.136	752
3(2H)-Furanone, dihydro-5-methyl-	0.46	42.06	XIC(42.06Â±500ppm)	7117102	265	186	5.33348 min, 2.436 s	0.127	731
Thiazole, 2-methyl-	1.39	58	XIC(58.00Â±500ppm)	4957762	981	920	5.41682 min, 2.455 s	0.141	856
4-Pentenoic acid, methyl ester	1.94	55.07	XIC(55.07Â±500ppm)	5561926	570	536	5.50016 min, 2.034 s	0.132	813
3-Pentenal, 4-methyl-	0.51	43.03	XIC(43.03Â±500ppm)	5624858	213	277	5.66684 min, 2.184 s	0.12	733
Pyridine, 2-methyl-	2.04	93.05	XIC(93.05Â±500ppm)	167313267	2804	6128	5.66684 min, 2.373 s	0.149	904
Pentane, 2-bromo-	1.27	43.07	XIC(43.07Â±500ppm)	24069654	482	845	5.75018 min, 2.316 s	0.157	831
Crotonic acid	0.68	41.05	XIC(41.05Â±500ppm)	9167677	598	274	5.83352 min, 2.029 s	0.097	738
Pyrazine, methyl-	1.49	94.04	XIC(94.04Â±500ppm)	239882799	68096	12104	5.83352 min, 2.534 s	0.154	938
Methyl valerate	1.33	74.04	XIC(74.04Â±500ppm)	5932471	930	744	5.91686 min, 1.987 s	0.107	822
Ethane, 1,2-bis[(4-amino-3-furazanyl)oxy]-	1.19	54.02	XIC(54.02Â±500ppm)	48983910	3525	5507	6.0002 min, 2.759 s	0.153	702
2-Hydroxy-2,5-dimethyl-hept-6-en-3-one	1.31	59.06	XIC(59.06Â±500ppm)	13577528	1993	2465	6.08354 min, 2.213 s	0.149	719
Propanoic acid, 2-methyl-, anhydride	0.11	43.06	XIC(43.06Â±500ppm)	8740395	2401	456	6.08354 min, 2.632 s	0.15	737
Furan, 2-ethyl-	0.88	53.05	XIC(53.05Â±500ppm)	9780266	341	1124	6.25022 min, 2.475 s	0.124	734
3-Hexen-2-one	2.61	83.05	XIC(83.05Â±500ppm)	27588243	2039	4995	6.33356 min, 2.340 s	0.159	835
2-Propenoic acid, ethenyl ester	0.69	55.05	XIC(55.05Â±500ppm)	80403042	521	6336	6.33356 min, 2.489 s	0.146	814
Cyclopentanone, 2-methyl-	0.8	42.06	XIC(42.06Â±500ppm)	59946918	782	1841	6.33356 min, 2.519 s	0.14	768
Isoamyl cyanide	0.73	55.06	XIC(55.06Â±500ppm)	67506127	1506	4996	6.4169 min, 2.462 s	0.174	760
1,4-Cyclohexadiene, 1,2-dimethyl-	1.14	93.06	XIC(93.06Â±500ppm)	9088066	1394	1764	6.50024 min, 1.912 s	0.117	915
Cyclopentanone, 3-methyl-	1.1	69.04	XIC(69.04Â±500ppm)	31528920	1390	2800	6.50024 min, 2.589 s	0.146	893
3-Pentenoic acid, methyl ester	2.94	55.07	XIC(55.07Â±500ppm)	3670462	340	438	6.58358 min, 2.221 s	0.158	762
Butanoic acid, 2-methyl-	1.46	74.04	XIC(74.04Â±500ppm)	7740644	1458	865	6.66692 min, 1.935 s	0.118	779
1,2-Ethanediol, monoacetate	1.26	43.03	XIC(43.03Â±500ppm)	67269001	5324	2374	6.66692 min, 2.694 s	0.139	967
2-Hexenal, (E)-	0.82	41.05	XIC(41.05Â±500ppm)	4234512	216	264	6.75026 min, 2.372 s	0.108	836
2-Furanmethanol	1.31	98.03	XIC(98.03Â±500ppm)	266011743	3172	10346	6.8336 min, 2.682 s	0.165	908
Cyclopentene, 3-ethylidene-1-methyl-	1.17	93.06	XIC(93.06Â±500ppm)	1949277	481	590	6.91694 min, 2.007 s	0.126	841
2-Hexanone, 5-methyl-	3.42	43.04	XIC(43.04Â±500ppm)	16117560	374	549	6.91694 min, 2.145 s	0.15	784
3,4-Dimethyl-2-hexene	4.97	55.07	XIC(55.07Â±500ppm)	3857011	506	381	6.91694 min, 2.189 s	0.149	793
Furan, 2-(methoxymethyl)-	4.45	53.05	XIC(53.05Â±500ppm)	1766387	250	237	7.08362 min, 2.418 s	0.116	775
Pyridine, 3-methyl-	2.53	93.05	XIC(93.05Â±500ppm)	148841495	3006	4527	7.08362 min, 2.703 s	0.164	906
Propanamide	1.68	44.03	XIC(44.03Â±500ppm)	17575953	115	197	7.16696 min, 3.181 s	0.143	895
2-Butenoic acid, 3-methyl-, methyl ester	1.35	83.05	XIC(83.05Â±500ppm)	4673546	675	857	7.2503 min, 2.341 s	0.133	812
5-Hepten-2-one	0.83	43.03	XIC(43.03Â±500ppm)	7847228	355	313	7.41698 min, 2.295 s	0.153	716
Phenylethyne	1.09	102.04	XIC(102.04Â±500ppm)	9925034	1507	3181	7.50032 min, 2.560 s	0.128	808
4-Cyclopentene-1,3-dione	1.12	96.01	XIC(96.01Â±500ppm)	15069836	3624	1599	7.58366 min, 3.945 s	0.167	932
2H-Pyran-3(4H)-one, dihydro-	2.73	42.05	XIC(42.05Â±500ppm)	16953818	938	697	7.75034 min, 3.195 s	0.151	859
Pentanoic acid	1.3	60.03	XIC(60.03Â±500ppm)	9394173	783	702	7.83368 min, 2.052 s	0.103	853
Pentanoic acid, 3-methyl-, methyl ester	1.12	74.04	XIC(74.04Â±500ppm)	3455321	403	443	7.83368 min, 2.113 s	0.131	823
Pyrazole, 1,4-dimethyl-	1.56	95.01	XIC(95.01Â±500ppm)	2933491	473	720	7.91702 min, 2.515 s	0.12	785
2,6-Lutidine	1.71	107.07	XIC(107.07Â±500ppm)	31560446	3006	3169	7.91702 min, 2.560 s	0.162	840
4-Heptanone, 3-methyl-	1.56	43.07	XIC(43.07Â±500ppm)	6031827	408	306	8.00036 min, 2.251 s	0.121	774
2-Butenal, 2-ethenyl-	0.94	67.06	XIC(67.06Â±500ppm)	10795510	626	1594	8.00036 min, 2.922 s	0.137	804
2-Heptanone	1.08	43.04	XIC(43.04Â±500ppm)	24634028	1642	947	8.0837 min, 2.267 s	0.116	904
Furan, 2-methoxy-	1.86	83.05	XIC(83.05Â±500ppm)	4347782	978	926	8.25038 min, 2.400 s	0.138	728
2H-Pyran, 2-(butylthio)tetrahydro-	2.79	85.06	XIC(85.06Â±500ppm)	1650492	645	562	8.41706 min, 2.061 s	0.131	806
Cyclopentanecarboxamide, N-allyl-	1.16	69.04	XIC(69.04Â±500ppm)	4301380	608	737	8.41706 min, 2.897 s	0.151	710
Glutaraldehyde	1.1	44.04	XIC(44.04Â±500ppm)	18881227	442	231	8.41706 min, 3.358 s	0.151	716
Ethanone, 1-(2-furanyl)-	1.18	95.01	XIC(95.01Â±500ppm)	22961075	1982	3852	8.5004 min, 3.071 s	0.147	888
Pyridine, 2-ethyl-	1.98	106.06	XIC(106.06Â±500ppm)	38464257	2854	3433	8.58374 min, 2.699 s	0.161	871
Dinocap	3.03	69.04	XIC(69.04Â±500ppm)	19155618	2925	1474	8.58374 min, 3.014 s	0.29	811
Pyrazine, 2,6-dimethyl-	3.34	42.05	XIC(42.05Â±500ppm)	45109472	1064	972	8.75042 min, 2.871 s	0.21	783
1,3-Cyclopentanedione	0.99	42.03	XIC(42.03Â±500ppm)	24296136	1033	497	8.75042 min, 3.686 s	0.145	829
Fumaronitrile	0.29	78.03	XIC(78.03Â±500ppm)	12354896	266	286	8.75042 min, 4.184 s	0.155	896
Methyl acetoxyacetate	1.72	43.03	XIC(43.03Â±500ppm)	60702018	1704	2171	8.83376 min, 2.990 s	0.147	957
Butanoic acid, 4-hydroxy-	1.25	42.06	XIC(42.06Â±500ppm)	425635935	9451	6255	8.83376 min, 4.486 s	0.207	930
Pyrazine, ethyl-	1.52	107.05	XIC(107.05Â±500ppm)	76361613	2783	5182	8.9171 min, 2.875 s	0.152	913
Anisole	1.23	108.05	XIC(108.05Â±500ppm)	17252253	4634	2387	9.00044 min, 2.843 s	0.143	751
Pyrazine, 2,3-dimethyl-	1.66	67.05	XIC(67.05Â±500ppm)	27084814	1151	1998	9.08378 min, 2.945 s	0.167	899
2H-Tetrazole, 2,5-dimethyl-	0.99	42.05	XIC(42.05Â±500ppm)	13132375	884	228	9.08378 min, 3.668 s	0.163	711
p-Benzoquinone	0.74	54.03	XIC(54.03Â±500ppm)	12571682	1071	1437	9.08378 min, 3.842 s	0.236	897
3,4,5,6-Tetrahydrophthalic anhydride	1.23	79.06	XIC(79.06Â±500ppm)	12325694	1193	939	9.25046 min, 3.017 s	0.164	779
2-Cyclopenten-1-one, 2-hydroxy-	2.62	98.03	XIC(98.03Â±500ppm)	6787679	2496	1830	9.25046 min, 3.350 s	0.145	837
2,7-Nonadien-5-one, 4,6-dimethyl-	1.22	69.04	XIC(69.04Â±500ppm)	5909312	1073	887	9.3338 min, 2.546 s	0.127	724
Butanoic acid, 4-hydroxy-2-methylene-	1.28	40.04	XIC(40.04Â±500ppm)	14702362	1604	524	9.3338 min, 3.565 s	0.163	741
1,6:2,3-Dianhydro-4-O-acetyl-ÃŸ-d-allopyranose	7.46	43.04	XIC(43.04Â±500ppm)	2470692	150	79	9.50048 min, 2.240 s	0.101	763
Pyrazine, ethenyl-	1.35	106.05	XIC(106.05Â±500ppm)	15265158	1891	2696	9.50048 min, 3.155 s	0.151	873
2,5-Hexanedione	1.24	43.03	XIC(43.03Â±500ppm)	55139823	2309	1920	9.50048 min, 3.464 s	0.171	949
2-Cyclohexen-1-one	1.19	68.03	XIC(68.03Â±500ppm)	75921599	8947	5791	9.58382 min, 3.542 s	0.177	877
1,6:2,3-Dianhydro-4-O-acetyl-ÃŸ-d-gulopyranose	0.89	43.05	XIC(43.05Â±500ppm)	322570	154	21	9.66716 min, 2.221 s	0.099	743
Pyridine, 3,4-dimethyl-	2.48	107.07	XIC(107.07Â±500ppm)	62588656	1730	3146	9.66716 min, 2.809 s	0.167	939
Pyridine, 2-ethenyl-	1.53	105.05	XIC(105.05Â±500ppm)	14377711	1310	1521	9.66716 min, 3.093 s	0.156	889
Sulfurous acid, butyl octyl ester	1.29	57.08	XIC(57.08Â±500ppm)	500259	120	108	9.7505 min, 1.698 s	0.111	703
2-Pentene, 3-ethyl-2-methyl-	4.07	83.05	XIC(83.05Â±500ppm)	4545503	874	1201	9.83384 min, 2.579 s	0.12	824
Cyclopentanone, 2-ethyl-	1.17	84.06	XIC(84.06Â±500ppm)	5800138	1006	1096	9.83384 min, 2.843 s	0.155	763
2-Cyclopenten-1-one, 3,4-dimethyl-	1.13	67.06	XIC(67.06Â±500ppm)	51781436	2853	3793	9.83384 min, 2.972 s	0.163	858
N-Methylmaleimide	1.11	54.03	XIC(54.03Â±500ppm)	4785164	737	673	9.83384 min, 3.893 s	0.169	953
2-Isopropylimidazole	1.14	95.02	XIC(95.02Â±500ppm)	1442433	141	325	10.0005 min, 2.904 s	0.144	710
2(5H)-Furanone, 5-methyl-	1.17	55.03	XIC(55.03Â±500ppm)	70184290	2102	3809	10.0005 min, 4.121 s	0.186	877
Benzene, 2-propenyl-	1.1	117.07	XIC(117.07Â±500ppm)	1003847	340	387	10.1672 min, 2.558 s	0.124	733
Pyridine, 2,3-dimethyl-	2.34	107.07	XIC(107.07Â±500ppm)	21590478	942	1878	10.1672 min, 2.943 s	0.177	772
1,3-Cyclohexadiene, 5-ethyl-	0.68	79.06	XIC(79.06Â±500ppm)	8314279	444	729	10.2505 min, 3.061 s	0.142	831
2(3H)-Furanone, dihydro-3-methyl-	1.15	41.06	XIC(41.06Â±500ppm)	15879200	1641	527	10.3339 min, 4.121 s	0.193	854
trans,trans-3,5-Heptadien-2-one	1.45	67.06	XIC(67.06Â±500ppm)	2731977	346	425	10.4172 min, 2.809 s	0.195	793
2-Methylidenecyclohexan-1-one	0.8	67.06	XIC(67.06Â±500ppm)	3197475	393	468	10.5006 min, 2.862 s	0.202	706
2(3H)-Furanone, dihydro-5-methyl-	1.18	56.06	XIC(56.06Â±500ppm)	18417616	2347	1297	10.5006 min, 4.171 s	0.183	940
Pyridine, 2-(1-methylethyl)-	2.11	106.06	XIC(106.06Â±500ppm)	4472166	796	876	10.5839 min, 2.685 s	0.172	889
3-Ethylcyclopentanone	1.4	83.05	XIC(83.05Â±500ppm)	5708066	1364	1332	10.5839 min, 2.976 s	0.149	828
Cyclopentanone, 3,4-bis(methylene)-	1.16	79.06	XIC(79.06Â±500ppm)	32556419	2114	2145	10.5839 min, 3.110 s	0.147	825
2(5H)-Furanone, 5,5-dimethyl-	1.22	97.02	XIC(97.02Â±500ppm)	3761058	664	1059	10.5839 min, 3.661 s	0.196	731
2-Heptenal, (E)-	2.97	41.05	XIC(41.05Â±500ppm)	1645521	247	118	10.6672 min, 2.621 s	0.122	816
2-Cyclopenten-1-one, 2,3,4-trimethyl-	4.88	109.06	XIC(109.06Â±500ppm)	1005663	269	312	10.7506 min, 2.754 s	0.178	702
Pyridine, 3-ethyl-	2.33	92.05	XIC(92.05Â±500ppm)	8918509	935	860	10.7506 min, 3.042 s	0.172	923
4(1H)-Pyrimidinone, 1-methyl-	0.96	110.03	XIC(110.03Â±500ppm)	17784670	620	3664	10.7506 min, 3.541 s	0.203	712
2(3H)-Furanone, dihydro-4-methyl-	1.16	42.06	XIC(42.06Â±500ppm)	5304313	386	212	10.7506 min, 4.247 s	0.197	857
3-Pentenoic acid, 4-methyl-, methyl ester	1	69.04	XIC(69.04Â±500ppm)	4790112	307	781	10.8339 min, 3.236 s	0.148	717
3-Hexene-2,5-dione	1.12	43.03	XIC(43.03Â±500ppm)	6940257	584	314	10.8339 min, 3.615 s	0.173	738
Pyridine, 4-ethyl-	3.95	107.07	XIC(107.07Â±500ppm)	2318863	343	439	10.9173 min, 3.052 s	0.183	839
2,3-Pentanedione	1.09	57.04	XIC(57.04Â±500ppm)	89011954	3767	9738	11.0006 min, 3.224 s	0.148	802
Furan, 3-methyl-	1.75	82.04	XIC(82.04Â±500ppm)	3939862	308	697	11.0006 min, 3.265 s	0.18	711
Carbamic acid, monoammonium salt	1.7	44	XIC(44.00Â±500ppm)	5337607	164	126	11.0006 min, 3.685 s	0.054	912
6-Hepten-1-ol	1.96	55.07	XIC(55.07Â±500ppm)	1530367	114	107	11.0839 min, 2.427 s	0.14	731
Pyridine, 2-ethyl-6-methyl-	0.63	120.07	XIC(120.07Â±500ppm)	12545711	540	2463	11.0839 min, 2.720 s	0.135	870
2-Butanone, 1-(acetyloxy)-	1.18	43.03	XIC(43.03Â±500ppm)	109500236	3499	2545	11.1673 min, 3.228 s	0.15	922
2-Cyclopenten-1-one, 3,4,4-trimethyl-	6.24	81.07	XIC(81.07Â±500ppm)	1899606	385	365	11.2506 min, 2.760 s	0.178	792
2H-Pyran-2-one	1.26	68.04	XIC(68.04Â±500ppm)	40296554	5479	3183	11.2506 min, 4.510 s	0.178	835
2-Acetyl-5-methylfuran	2.69	109.03	XIC(109.03Â±500ppm)	4987541	643	1572	11.334 min, 3.124 s	0.154	768
2,4,6-Cycloheptatrien-1-one	1.11	106.04	XIC(106.04Â±500ppm)	3563960	419	719	11.4173 min, 3.629 s	0.148	776
4-Pyridinecarbonitrile	1.48	104.03	XIC(104.03Â±500ppm)	5686533	1257	855	11.4173 min, 4.103 s	0.167	936
Methyl 2-furoate	1.15	95	XIC(95.00Â±500ppm)	106741860	16467	10989	11.5006 min, 3.397 s	0.153	924
4(3H)-Pyrimidinone, 3-methyl-	1.1	110.03	XIC(110.03Â±500ppm)	63523656	3842	6146	11.584 min, 4.194 s	0.165	702
4-Methyl-5H-furan-2-one	1.08	41.05	XIC(41.05Â±500ppm)	74002079	4048	2800	11.584 min, 4.410 s	0.18	827
2(3H)-Furanone, dihydro-3-methylene-	1.06	68.03	XIC(68.03Â±500ppm)	8181811	963	818	11.7507 min, 4.549 s	0.179	816
1H-Pyrazole, 3-methyl-	1.41	82.04	XIC(82.04Â±500ppm)	8831150	770	1409	11.9173 min, 3.365 s	0.197	721
3-Octanone	10.08	43.07	XIC(43.07Â±500ppm)	1460365	271	132	12.0007 min, 2.402 s	0.112	898
Pentanoic acid, 4-oxo-, methyl ester	0.98	43.03	XIC(43.03Â±500ppm)	23040428	751	711	12.084 min, 3.489 s	0.146	918
Benzene, 1-ethenyl-3-methyl-	1.1	118.07	XIC(118.07Â±500ppm)	24930586	1699	5229	12.2507 min, 2.753 s	0.127	910
Pyridine, 2,3,6-trimethyl-	2.04	121.08	XIC(121.08Â±500ppm)	6510370	643	1182	12.334 min, 2.845 s	0.175	794
Benzofuran	1.09	118.03	XIC(118.03Â±500ppm)	72322919	2310	18482	12.334 min, 3.213 s	0.141	921
2-Thiophenecarbonitrile	1.15	108.99	XIC(108.99Â±500ppm)	3048835	771	945	12.334 min, 4.040 s	0.156	884
2-Furanmethanol, acetate	2.62	81.03	XIC(81.03Â±500ppm)	11328966	560	1997	12.4174 min, 3.149 s	0.131	910
Phosphonic acid, (p-hydroxyphenyl)-	2.03	94.04	XIC(94.04Â±500ppm)	4701331	502	322	12.5007 min, 2.901 s	0.157	808
Pyrazine, 2-ethyl-6-methyl-	3.54	121.07	XIC(121.07Â±500ppm)	6146773	1269	1353	12.5007 min, 3.006 s	0.158	764
1,2-Ethanediol, diacetate	1.53	43.03	XIC(43.03Â±500ppm)	8100424	626	378	12.5007 min, 3.134 s	0.156	843
1-Propanone, 1-(2-furanyl)-	0.51	95.02	XIC(95.02Â±500ppm)	6121049	393	1110	12.5007 min, 3.282 s	0.186	762
1,3-Cyclopentanedione, 2,2-dimethyl-	0.24	110.03	XIC(110.03Â±500ppm)	3485389	140	620	12.5007 min, 3.918 s	0.145	714
2-Thiophenecarboxaldehyde	1.04	110.98	XIC(110.98Â±500ppm)	5519053	1257	1392	12.5007 min, 4.157 s	0.16	770
Dihydro-2(3H)-thiophenone	1.06	102.01	XIC(102.01Â±500ppm)	3327404	1365	1093	12.5007 min, 4.556 s	0.177	902
2-Furanmethanol, tetrahydro-5-methyl-, trans-	1.27	85.06	XIC(85.06Â±500ppm)	1747979	652	488	12.5841 min, 2.219 s	0.116	833
1,3-Benzodioxole	1.02	121.02	XIC(121.02Â±500ppm)	14177553	693	2769	12.5841 min, 3.345 s	0.141	915
Pyridine, 3-methoxy-	2.17	109.05	XIC(109.05Â±500ppm)	30459104	1882	1852	12.5841 min, 3.610 s	0.167	894
2-Furanone, 2,5-dihydro-3,5-dimethyl	1.2	69.04	XIC(69.04Â±500ppm)	76806583	4126	4942	12.5841 min, 3.933 s	0.176	878
Pyrazine, trimethyl-	3.42	42.05	XIC(42.05Â±500ppm)	9483623	928	294	12.6674 min, 3.061 s	0.19	857
1H-Pyrrole-2-carboxaldehyde, 1-methyl-	1.12	109.05	XIC(109.05Â±500ppm)	7114983	992	1058	12.7507 min, 3.812 s	0.17	885
3-Pyridinecarbonitrile	1.56	104.03	XIC(104.03Â±500ppm)	19604554	1757	1751	12.8341 min, 4.174 s	0.163	947
Pyridine, 2,3,5-trimethyl-	2.18	121.08	XIC(121.08Â±500ppm)	8913894	585	1317	12.9174 min, 2.932 s	0.169	825
1H-Pyrrole-2-carboxaldehyde	1.19	95.03	XIC(95.03Â±500ppm)	14032072	1454	1327	12.9174 min, 3.914 s	0.144	918
Benzene, 1-methoxy-2-methyl-	1.13	122.07	XIC(122.07Â±500ppm)	7338556	499	1769	13.0008 min, 2.954 s	0.139	879
p-Benzoquinone, 2-methyl-	1.17	54.03	XIC(54.03Â±500ppm)	2846341	348	429	13.0841 min, 3.970 s	0.218	848
3-Thiophenecarbonitrile	1.16	108.99	XIC(108.99Â±500ppm)	3339319	907	938	13.1674 min, 4.383 s	0.161	871
5,6,7,8-Tetrahydroindolizine	4.21	120.08	XIC(120.08Â±500ppm)	13963573	402	2072	13.2508 min, 2.936 s	0.158	827
3-Ethenyl-3-methylcyclopentanone	1.07	68.04	XIC(68.04Â±500ppm)	13923072	1056	1418	13.2508 min, 3.803 s	0.169	741
6-Heptenoic acid, methyl ester	1.17	74.04	XIC(74.04Â±500ppm)	1197817	288	219	13.3341 min, 2.518 s	0.112	888
Benzoxazole	0.65	119.03	XIC(119.03Â±500ppm)	5578823	462	1284	13.3341 min, 3.584 s	0.163	910
Benzene, 1-methoxy-4-methyl-	1.1	122.06	XIC(122.06Â±500ppm)	71600746	4212	11366	13.4175 min, 3.030 s	0.139	936
1,3-Hexadiene, 2,5-dimethyl-	0.89	95.05	XIC(95.05Â±500ppm)	20098139	2437	1675	13.4175 min, 3.668 s	0.173	717
2-Cyclopenten-1-one, 3,4,5-trimethyl-	1.19	81.07	XIC(81.07Â±500ppm)	6931600	1372	1073	13.6675 min, 3.058 s	0.152	826
1,2-Cyclopentanedione, 3-methyl-	1.13	112.04	XIC(112.04Â±500ppm)	71718260	1854	5503	13.6675 min, 3.586 s	0.146	899
3-Pyridinol, 6-methyl-	1.37	109.05	XIC(109.05Â±500ppm)	3058439	621	354	13.6675 min, 4.044 s	0.172	795
Heptanoic acid, methyl ester	1.19	74.04	XIC(74.04Â±500ppm)	1861514	408	299	13.7508 min, 2.362 s	0.108	854
(3-Methyl-1,2,4-oxadiazol-5-yl)methanol	6.19	57.06	XIC(57.06Â±500ppm)	1795829	236	378	13.7508 min, 3.309 s	0.169	735
(1H)Pyrrole-2-carbonitrile, 5-methyl-	1.27	106.05	XIC(106.05Â±500ppm)	4622853	1032	681	13.7508 min, 4.078 s	0.168	795
Pyridine, 2,4,6-trimethyl-	2.36	121.08	XIC(121.08Â±500ppm)	2923211	217	614	13.8342 min, 2.982 s	0.181	773
1,4-Cyclohexanedione	1.55	56.04	XIC(56.04Â±500ppm)	4173750	828	618	13.8342 min, 3.949 s	0.256	784
1,4-Cyclohex-2-enedione	1.11	54.03	XIC(54.03Â±500ppm)	18973712	1563	1682	13.8342 min, 4.044 s	0.144	848
4-Methyl-2H-pyran	1.06	96.06	XIC(96.06Â±500ppm)	2881793	200	494	13.9175 min, 3.109 s	0.143	781
2-Acetoxyacetophenone	0.49	121.03	XIC(121.03Â±500ppm)	5037277	426	1660	13.9175 min, 3.188 s	0.133	751
4(3H)-Pyrimidinone, 6-amino-2-methyl-	1.14	40.04	XIC(40.04Â±500ppm)	7505513	533	475	13.9175 min, 3.911 s	0.166	706
1-Methylcyclooctene	1.2	96.05	XIC(96.05Â±500ppm)	9671692	1185	1447	14.0008 min, 3.092 s	0.151	749
Bicyclo[3.2.0]hept-3-en-2-one	1.05	79.06	XIC(79.06Â±500ppm)	29997693	589	1539	14.0008 min, 3.672 s	0.165	844
Hydroquinone	1.29	110.03	XIC(110.03Â±500ppm)	5797961	552	807	14.0842 min, 4.254 s	0.171	809
Amyl cyclopentenone	1.3	84.05	XIC(84.05Â±500ppm)	2733620	689	580	14.1675 min, 2.968 s	0.148	787
2-Furancarboxylic acid, 3-methyl-, methyl ester	1.16	109.03	XIC(109.03Â±500ppm)	1692098	322	349	14.1675 min, 3.000 s	0.128	773
Carbamic acid, phenyl-, phenyl ester	1.26	94.04	XIC(94.04Â±500ppm)	1059478	178	128	14.2509 min, 2.588 s	0.101	730
(2-Aziridinylethyl)amine	6.6	44	XIC(44.00Â±500ppm)	4567496	165	128	14.2509 min, 3.668 s	0.058	768
4-Oxohex-2-enal	1.15	83.03	XIC(83.03Â±500ppm)	18863703	3144	2404	14.2509 min, 4.252 s	0.164	859
1H-Indene, 1-chloro-2,3-dihydro-	1.07	116.05	XIC(116.05Â±500ppm)	113857077	3114	15242	14.4175 min, 3.305 s	0.146	946
Benzaldehyde, 2-hydroxy-	1.11	122.03	XIC(122.03Â±500ppm)	15953157	1015	2375	14.4175 min, 3.657 s	0.142	944
Benzene, 3-butenyl-	1.17	91.05	XIC(91.05Â±500ppm)	5633476	531	471	14.5009 min, 2.700 s	0.12	881
Orcinol	1.26	123.04	XIC(123.04Â±500ppm)	5749058	1358	1492	14.5009 min, 3.494 s	0.153	785
Pyrrolidine, 1-methyl-	1.22	84.04	XIC(84.04Â±500ppm)	6113017	420	1339	14.5009 min, 3.899 s	0.153	746
4,4-Dimethylcyclohexadienone	2.46	79.06	XIC(79.06Â±500ppm)	4511111	448	621	14.5842 min, 3.201 s	0.136	810
Pyridine, 2-(2-methylpropyl)-	1.99	93.06	XIC(93.06Â±500ppm)	3613933	844	688	14.6676 min, 2.814 s	0.164	841
4-Aminostyrene	1.67	119.07	XIC(119.07Â±500ppm)	1689189	610	435	14.6676 min, 3.304 s	0.164	708
2-Cyclohexen-1-one, 3,4-dimethyl-	1.45	96.06	XIC(96.06Â±500ppm)	5013517	498	819	14.8342 min, 3.161 s	0.153	782
3-Hexanone, 2,5-dimethyl-4-nitro-	2.66	43.05	XIC(43.05Â±500ppm)	4558593	560	330	14.9176 min, 3.237 s	0.174	773
2H-Pyran-2-one, tetrahydro-	1.22	42.03	XIC(42.03Â±500ppm)	48887209	2808	1066	14.9176 min, 5.226 s	0.2	894
2-Cyclopenten-1-one, 3-ethyl-2-hydroxy-	1.96	43.05	XIC(43.05Â±500ppm)	7059814	619	390	15.0009 min, 3.246 s	0.173	742
2-Cyclohexen-1-one, 3-methyl-	1.28	82.04	XIC(82.04Â±500ppm)	9949201	955	1082	15.0009 min, 3.873 s	0.165	849
Benzene, isocyanato-	2.18	119.03	XIC(119.03Â±500ppm)	5170308	825	768	15.0009 min, 3.983 s	0.174	869
2(3H)-Furanone, 5-ethyldihydro-	1.18	85.03	XIC(85.03Â±500ppm)	5147647	974	1292	15.0009 min, 4.250 s	0.166	943
5-Ethyl-2-furaldehyde	0.3	109.02	XIC(109.02Â±500ppm)	1772965	268	435	15.1676 min, 3.558 s	0.125	853
2-Octenal, (E)-	1.41	55.05	XIC(55.05Â±500ppm)	901374	128	127	15.2509 min, 2.723 s	0.111	723
Ethanone, 1-(1H-pyrrol-2-yl)-	1.2	94.03	XIC(94.03Â±500ppm)	9384313	896	705	15.2509 min, 3.950 s	0.147	877
Nonane, 2,3-dimethyl-	0.71	43.06	XIC(43.06Â±500ppm)	500083	115	36	15.3343 min, 1.797 s	0.088	788
Benzene, 1,3-diethyl-	0.78	105.07	XIC(105.07Â±500ppm)	1597335	182	299	15.3343 min, 2.665 s	0.133	760
Acetic acid, phenyl ester	1.06	94.04	XIC(94.04Â±500ppm)	13478204	1229	1616	15.3343 min, 3.421 s	0.137	855
2-Furancarboxamide, N-methyl-N-isobutyl-	1.1	95.01	XIC(95.01Â±500ppm)	9712599	1063	2005	15.4176 min, 3.917 s	0.143	751
2-Pyridinecarbonitrile	1.31	104.03	XIC(104.03Â±500ppm)	28016646	1450	2577	15.4176 min, 4.631 s	0.17	941
Benzoic acid, 4-amino-, 4-hydroximino-2,2,6,6-tetramethyl-1-piperidinyl ester	1.09	120.05	XIC(120.05Â±500ppm)	40216007	897	5180	15.501 min, 3.742 s	0.225	838
Benzeneacetic acid, a-oxo-, ethyl ester	1.21	105.02	XIC(105.02Â±500ppm)	73227458	2430	8658	15.501 min, 3.783 s	0.148	850
Bicyclo[3.1.0]hexan-2-ol, 2-methyl-5-(1-methylethyl)-, (1a,2ÃŸ,5a)-	1.32	93.07	XIC(93.07Â±500ppm)	3113838	843	541	15.5843 min, 2.503 s	0.155	806
Benzaldehyde, 2-methyl-	1.34	91.05	XIC(91.05Â±500ppm)	71931448	3795	3985	15.5843 min, 3.616 s	0.15	904
Benzyl nitrile	1.3	117.05	XIC(117.05Â±500ppm)	41867777	2143	4733	15.5843 min, 3.754 s	0.158	795
Benzene, 2-butenyl-	1.12	84.04	XIC(84.04Â±500ppm)	1431518	596	327	15.6676 min, 2.769 s	0.142	710
2-Piperidinone, 6-methyl-	1.08	55.03	XIC(55.03Â±500ppm)	3392706	698	412	15.6676 min, 5.326 s	0.205	728
Cyclohexanone, 3-ethenyl-	1.13	124.05	XIC(124.05Â±500ppm)	3642080	596	930	15.751 min, 4.068 s	0.145	802
Pyridine, 2-ethyl-4,6-dimethyl-	2.15	134.09	XIC(134.09Â±500ppm)	2497826	664	719	15.8343 min, 2.847 s	0.158	847
2,3-Dimethyl-4-hydroxy-2-butenoic lactone	1.2	55.07	XIC(55.07Â±500ppm)	13577580	1614	975	15.8343 min, 4.349 s	0.165	800
Benzene, (2-methyl-1-propenyl)-	1.1	117.07	XIC(117.07Â±500ppm)	1471106	263	445	15.9177 min, 2.838 s	0.151	831
2-Hydroxy-3,5-dimethylcyclopent-2-en-1-one	1.2	55.07	XIC(55.07Â±500ppm)	2607324	332	208	15.9177 min, 3.377 s	0.161	713
2-Cyclopenten-1-one, 3-ethyl-	1.4	81.03	XIC(81.03Â±500ppm)	31369458	6433	2916	15.9177 min, 3.844 s	0.154	848
Dihydro-3-methylene-5-methyl-2-furanone	1.18	68.03	XIC(68.03Â±500ppm)	10452187	1559	1424	15.9177 min, 4.768 s	0.178	900
2-Undecanethiol, 2-methyl-	1.2	69.08	XIC(69.08Â±500ppm)	2111106	439	355	16.0843 min, 1.859 s	0.113	849
Phenol, 3-methyl-	1.28	107.04	XIC(107.04Â±500ppm)	376274455	7407	8659	16.0843 min, 3.225 s	0.157	936
Heptanoic acid	1.25	60.03	XIC(60.03Â±500ppm)	2074480	540	379	16.1677 min, 2.342 s	0.094	911
2-Methylindene	1	130.07	XIC(130.07Â±500ppm)	6832800	561	2133	16.251 min, 3.119 s	0.139	861
1,2,4-Triazin-3-amine, 5,6-dimethyl-	1.13	124.05	XIC(124.05Â±500ppm)	20351513	1056	3781	16.251 min, 4.146 s	0.163	735
Benzene, 1-methyl-4-(1-methylethenyl)-	1.15	117.07	XIC(117.07Â±500ppm)	4342766	864	1167	16.3344 min, 2.804 s	0.129	898
Naphthalene, 1,2-dihydro-4-methyl-	1.13	129.07	XIC(129.07Â±500ppm)	2219875	379	757	16.3344 min, 2.858 s	0.168	849
Octanenitrile	1.26	82.07	XIC(82.07Â±500ppm)	1410128	269	263	16.3344 min, 2.936 s	0.118	796
1,10-Undecadiene	0.94	41.05	XIC(41.05Â±500ppm)	1059861	219	105	16.4177 min, 1.993 s	0.089	913
o-Isopropenyltoluene	0.85	132.09	XIC(132.09Â±500ppm)	6063860	736	1760	16.4177 min, 2.893 s	0.228	710
Hexanoic acid, 4-oxo-, methyl ester	0.76	57.05	XIC(57.05Â±500ppm)	1705094	287	286	16.501 min, 3.470 s	0.13	775
Benzene, 1-methyl-3-(1-methylethenyl)-	1.05	117.07	XIC(117.07Â±500ppm)	15869693	1414	1694	16.5844 min, 2.839 s	0.122	919
L-Fenchone	1.23	81.07	XIC(81.07Â±500ppm)	2954278	314	273	16.5844 min, 2.918 s	0.196	748
Phenol, 2-methoxy-	1.11	109.02	XIC(109.02Â±500ppm)	329151131	3917	8632	16.5844 min, 3.606 s	0.155	905
Benzonitrile, 3-methyl-	1.38	117.05	XIC(117.05Â±500ppm)	38516735	4161	3980	16.5844 min, 3.779 s	0.145	900
Cyclopentane, 1-acetyl-1,2-epoxy-	0.48	55.07	XIC(55.07Â±500ppm)	9281540	316	907	16.5844 min, 3.841 s	0.137	744
2,5-Pyrrolidinedione, 1-methyl-	1.34	113.04	XIC(113.04Â±500ppm)	45777251	2830	7236	16.6677 min, 5.397 s	0.205	933
Cyclopropyl carbinol	1.18	44.04	XIC(44.04Â±500ppm)	25892598	1006	346	16.7511 min, 5.160 s	0.215	762
1-Undecene	1.16	41.05	XIC(41.05Â±500ppm)	10667774	1518	493	16.8344 min, 1.897 s	0.083	922
3(2H)-Pyridazinone, 6-methyl-	1.36	82.04	XIC(82.04Â±500ppm)	1590618	432	250	16.8344 min, 4.730 s	0.18	702
2,4-Dimethylstyrene	1.14	117.07	XIC(117.07Â±500ppm)	8743935	899	1530	16.9177 min, 2.830 s	0.133	887
Benzoic acid, methyl ester	1.11	105.03	XIC(105.03Â±500ppm)	29621691	1448	3456	16.9177 min, 3.451 s	0.137	958
4-Hepten-3-one, 4-methyl-	1.28	97.03	XIC(97.03Â±500ppm)	26820223	3732	4098	16.9177 min, 3.879 s	0.158	822
Benzofuran, 2-methyl-	1.05	131.05	XIC(131.05Â±500ppm)	41483131	1353	11420	17.0011 min, 3.318 s	0.138	914
4-Undecene, (Z)-	1.63	69.07	XIC(69.07Â±500ppm)	852535	180	148	17.0844 min, 1.909 s	0.106	819
Bicyclo[3.1.0]hexan-2-ol, 2-methyl-5-(1-methylethyl)-, (1a,2a,5a)-	1.42	93.07	XIC(93.07Â±500ppm)	2503170	229	384	17.0844 min, 2.632 s	0.17	769
Bicyclo[2.2.2]octane, 2-methyl-	1.27	109.06	XIC(109.06Â±500ppm)	10048408	632	846	17.0844 min, 3.446 s	0.147	773
2-Methyl-1-octen-3-yne	0.88	79.06	XIC(79.06Â±500ppm)	8098692	765	740	17.0844 min, 3.533 s	0.185	792
2-Norcaranone, 3-methyl-	0.29	124.05	XIC(124.05Â±500ppm)	3040856	313	506	17.0844 min, 3.880 s	0.143	714
Benzene, 1-methyl-4-(2-propenyl)-	1.06	117.07	XIC(117.07Â±500ppm)	3153546	624	815	17.1678 min, 2.882 s	0.125	880
2-Ethyl-3-methylcyclopent-2-en-1-one	2.92	81.07	XIC(81.07Â±500ppm)	9179279	1341	1403	17.2511 min, 3.460 s	0.159	781
Benzonitrile, 4-methyl-	1.33	117.05	XIC(117.05Â±500ppm)	14611817	7395	2045	17.2511 min, 3.842 s	0.142	939
Acetaldehyde, (3,3-dimethylcyclohexylidene)-, (E)-	1.21	108.09	XIC(108.09Â±500ppm)	4009429	236	618	17.3344 min, 3.018 s	0.159	780
3-Methyl-3,4,5,6-tetrahydrophthalic anhydride	1.3	79.06	XIC(79.06Â±500ppm)	8279525	1220	972	17.3344 min, 3.455 s	0.134	702
Phenol, 3,4-dimethyl-	1.14	122.07	XIC(122.07Â±500ppm)	22714106	1008	2437	17.4178 min, 3.400 s	0.138	797
2,5-Cyclohexadiene-1,4-dione, 2,6-dimethyl-	0.91	68.04	XIC(68.04Â±500ppm)	5559615	402	582	17.4178 min, 3.824 s	0.143	768
Benzocyclobuten-1(2H)-one	1.16	90.04	XIC(90.04Â±500ppm)	2131943	560	691	17.4178 min, 4.087 s	0.152	883
1,5-Dimethyl-2-pyrrolecarbonitrile	1.61	119.06	XIC(119.06Â±500ppm)	3082931	517	622	17.4178 min, 4.132 s	0.169	795
2-Undecene, (E)-	1.54	55.07	XIC(55.07Â±500ppm)	2081979	169	203	17.5011 min, 1.918 s	0.083	901
2-Cyclopenten-1-one, 3,4,5,5-tetramethyl-	2.55	123.08	XIC(123.08Â±500ppm)	1780198	428	536	17.5011 min, 3.085 s	0.165	764
2,5-Dimethylanisole	1.84	136.08	XIC(136.08Â±500ppm)	12645364	1059	3448	17.5845 min, 2.965 s	0.148	885
Pentane, 1-propoxy-	1.37	43.03	XIC(43.03Â±500ppm)	18857950	1456	698	17.5845 min, 4.068 s	0.168	753
2,2-Dimethylindene, 2,3-dihydro-	1.06	131.08	XIC(131.08Â±500ppm)	644632	233	219	17.7511 min, 2.657 s	0.134	730
Benzene, 1-methyl-4-(1-propynyl)-	1.1	130.07	XIC(130.07Â±500ppm)	3917959	912	1963	17.7511 min, 3.069 s	0.122	755
Benzene, 1-ethyl-4-methoxy-	1.06	121.06	XIC(121.06Â±500ppm)	42459497	3049	4441	17.7511 min, 3.098 s	0.12	888
Levoglucosenone	1.08	98.04	XIC(98.04Â±500ppm)	2137568	739	579	17.7511 min, 4.749 s	0.18	909
2-Cyclohexen-1-one, 3,5-dimethyl-	1.07	82	XIC(82.00Â±500ppm)	4185770	575	929	17.8345 min, 3.913 s	0.135	764
Oxalic acid, allyl undecyl ester	1.19	57.08	XIC(57.08Â±500ppm)	613295	134	102	18.0845 min, 1.864 s	0.124	785
2-Cyclopenten-1-one, 2,3,4,5-tetramethyl-	1.26	123.08	XIC(123.08Â±500ppm)	3342593	490	896	18.0845 min, 3.110 s	0.163	738
3-Hydroxypyridine monoacetate	0.71	43.03	XIC(43.03Â±500ppm)	2081172	365	142	18.0845 min, 3.775 s	0.15	742
5-Oxotetrahydrofuran-2-carboxylic acid	1.04	85.01	XIC(85.01Â±500ppm)	39419642	1052	3666	18.0845 min, 4.776 s	0.151	768
Phenol, 2,3,5,6-tetramethyl-	1.02	135.04	XIC(135.04Â±500ppm)	2461447	454	609	18.1678 min, 3.198 s	0.133	703
(E)-1-Phenyl-1-butene	1.19	117.07	XIC(117.07Â±500ppm)	17511486	2016	2683	18.2512 min, 2.927 s	0.147	861
Imidazo[1,2-a]pyridin-2-ylmethyl-methyl-amine	0.84	132.07	XIC(132.07Â±500ppm)	5389260	122	2153	18.2512 min, 2.965 s	0.126	707
Benzene, 1,3-diethenyl-	0.94	130.07	XIC(130.07Â±500ppm)	2156076	461	909	18.2512 min, 3.149 s	0.113	819
Cyclopentanone, 2,2,4-trimethyl-	1.06	56.04	XIC(56.04Â±500ppm)	1293809	174	219	18.2512 min, 5.030 s	0.154	777
Cycloundecene (Z)	1.13	54.06	XIC(54.06Â±500ppm)	555051	149	120	18.4179 min, 2.076 s	0.085	822
Octanoic acid, methyl ester	1.16	74.04	XIC(74.04Â±500ppm)	1480573	382	329	18.4179 min, 2.403 s	0.099	889
Benzyl methyl ketone	1.09	43.03	XIC(43.03Â±500ppm)	10902940	488	485	18.4179 min, 3.822 s	0.144	824
2(3H)-Furanone, 5-acetyldihydro-	1.1	85.03	XIC(85.03Â±500ppm)	21764033	1993	2996	18.4179 min, 5.429 s	0.189	900
Hydroxylamine, O-decyl-	2.36	57.08	XIC(57.08Â±500ppm)	1016393	168	138	18.5012 min, 1.799 s	0.106	772
4-Acetyl-1-methylcyclohexene	4.61	95.08	XIC(95.08Â±500ppm)	974269	149	175	18.5845 min, 3.172 s	0.138	800
1-Propanone, 1-(5-methyl-2-furanyl)-	1.49	109.01	XIC(109.01Â±500ppm)	4761689	574	1021	18.5845 min, 3.502 s	0.178	784
2-Nonen-4-yne, (Z)-	0.8	79.06	XIC(79.06Â±500ppm)	3829781	194	381	18.5845 min, 3.752 s	0.119	708
2,3-Dimethylanisole	3.65	136.08	XIC(136.08Â±500ppm)	1547989	261	602	18.6679 min, 3.161 s	0.199	723
Bicyclo[3.1.1]hept-2-en-6-ol, 2,7,7-trimethyl-, acetate, [1S-(1a,5a,6ÃŸ)]-	3.25	91.05	XIC(91.05Â±500ppm)	875258	115	137	18.7512 min, 2.850 s	0.139	704
4H-1,2,4-Triazol-3-amine, 4-methyl-	1.25	98.06	XIC(98.06Â±500ppm)	2390395	629	606	18.7512 min, 3.334 s	0.162	721
Phenol, 2-methoxy-3-methyl-	1.08	123.04	XIC(123.04Â±500ppm)	906062	181	363	18.7512 min, 3.473 s	0.144	722
3-Pyridineacetonitrile	1.27	118.05	XIC(118.05Â±500ppm)	2033922	471	582	18.7512 min, 4.283 s	0.155	777
2,5-Pyrrolidinedione, 1-ethyl-	1.28	56.04	XIC(56.04Â±500ppm)	1255553	236	201	18.7512 min, 4.786 s	0.198	915
Ethanone, 1-(3-methylphenyl)-	2.19	91.05	XIC(91.05Â±500ppm)	5335030	858	706	18.8346 min, 3.593 s	0.151	829
1-Methylenespiro[2.4]heptan-4-one	0.44	79.06	XIC(79.06Â±500ppm)	6466688	277	538	18.8346 min, 3.840 s	0.137	818
2-Cyclohexen-1-one, 4,4-dimethyl-	1.19	82.08	XIC(82.08Â±500ppm)	1576991	299	345	18.9179 min, 3.670 s	0.148	796
Phenol, 2-ethyl-	1.14	107.05	XIC(107.05Â±500ppm)	37381756	2382	3625	19.0012 min, 3.225 s	0.122	906
Pentanedioic acid, dimethyl ester	1.09	128.05	XIC(128.05Â±500ppm)	1080983	277	393	19.0012 min, 3.291 s	0.116	741
2-Hepten-4-one, 2-methyl-	0.72	55.07	XIC(55.07Â±500ppm)	6575152	388	523	19.0846 min, 4.199 s	0.152	755
Benzene, 2,4-diethyl-1-methyl-	1.08	133.1	XIC(133.10Â±500ppm)	4062338	656	1185	19.1679 min, 2.623 s	0.135	881
Benzaldehyde, 2-ethyl-	1.28	133.06	XIC(133.06Â±500ppm)	856089	201	306	19.1679 min, 3.598 s	0.146	824
Bicyclo[3.2.1]oct-6-en-3-one	1.19	79.06	XIC(79.06Â±500ppm)	2634042	453	303	19.1679 min, 4.026 s	0.163	750
o-Ethylbenzonitrile	1.3	116.04	XIC(116.04Â±500ppm)	3580523	773	977	19.2513 min, 3.674 s	0.157	838
1H-Indene, 2,3-dihydro-2-methyl-	1.1	117.07	XIC(117.07Â±500ppm)	19991212	2042	3590	19.3346 min, 3.144 s	0.131	821
1H-Indene, 1-methyl-	1	130.07	XIC(130.07Â±500ppm)	64298424	2353	11716	19.3346 min, 3.315 s	0.13	931
Cyclohexanone, 2-(1-methylethylidene)-	1.11	138.06	XIC(138.06Â±500ppm)	10733604	624	2357	19.3346 min, 3.822 s	0.14	813
Cyclopentene,1-hexyl-	1.25	67.06	XIC(67.06Â±500ppm)	498868	109	97	19.4179 min, 2.146 s	0.094	750
Benzene, 4-pentenyl-	1.1	104.06	XIC(104.06Â±500ppm)	1297568	436	313	19.4179 min, 2.752 s	0.108	856
1H-Pyrrole-2-carbonitrile	1.19	92.03	XIC(92.03Â±500ppm)	4411781	549	720	19.4179 min, 4.066 s	0.133	890
2-Isobutyl-4-methylpyridine	7.78	107.07	XIC(107.07Â±500ppm)	6454402	795	726	19.5013 min, 2.863 s	0.15	825
Phenol, 2,6-dimethyl-	1.13	107.04	XIC(107.04Â±500ppm)	77882152	1615	4863	19.5013 min, 3.253 s	0.122	888
4-Hexen-3-one, 5-methyl-	1.26	83.05	XIC(83.05Â±500ppm)	4840046	1367	871	19.5013 min, 4.853 s	0.17	818
1H-Indene, 3-methyl-	1.22	130.07	XIC(130.07Â±500ppm)	50390536	7529	9950	19.5846 min, 3.348 s	0.177	909
Benzene, 1-ethenyl-4-methoxy-	1.06	134.07	XIC(134.07Â±500ppm)	12679500	2055	3445	19.5846 min, 3.412 s	0.12	861
1,4-Dioxaspiro[2.4]heptan-5-one, 7-methyl-	1.06	42.06	XIC(42.06Â±500ppm)	18312798	816	653	19.5846 min, 5.624 s	0.201	722
Benzofuran, 2,3-dihydro-	0.95	91.06	XIC(91.06Â±500ppm)	5348042	399	496	19.7513 min, 3.444 s	0.122	828
4-Hydroxy-2-methylbenzaldehyde	1.11	135.04	XIC(135.04Â±500ppm)	1311314	219	304	19.8346 min, 3.699 s	0.129	736
2-Nonenal, (E)-	0.66	44	XIC(44.00Â±500ppm)	1272054	105	28	20.0013 min, 2.699 s	0.102	729
Naphthalene, 1,2-dihydro-	1.15	128.06	XIC(128.06Â±500ppm)	13988686	1193	2200	20.0013 min, 3.541 s	0.138	820
Ethanone, 1-(3-hydroxyphenyl)-	1.11	121.02	XIC(121.02Â±500ppm)	2545175	440	600	20.0013 min, 3.825 s	0.136	838
Benzenepropanal	0.26	91.05	XIC(91.05Â±500ppm)	1318881	172	172	20.0013 min, 3.925 s	0.178	799
Pyrrolo[1,2-a]pyrazine, 1,2,3,4-tetrahydro-	1.19	121.05	XIC(121.05Â±500ppm)	4337001	619	525	20.0013 min, 4.482 s	0.164	726
3-Undecene, 9-methyl-, (Z)-	5.44	55.07	XIC(55.07Â±500ppm)	459273	119	81	20.0847 min, 1.914 s	0.087	802
Benzene, (3-methyl-3-butenyl)-	0.5	91.05	XIC(91.05Â±500ppm)	1975858	179	197	20.0847 min, 2.817 s	0.118	762
Methyl-a-d-ribofuranoside	1.18	57.05	XIC(57.05Â±500ppm)	1621798	488	323	20.0847 min, 5.021 s	0.185	703
1-Propanone, 1-phenyl-	1.18	105.03	XIC(105.03Â±500ppm)	8561724	887	1483	20.168 min, 3.640 s	0.131	930
Piperidine, 2-(tetrahydro-2-furanyl)-	1.41	84.04	XIC(84.04Â±500ppm)	4412098	1287	859	20.2513 min, 2.788 s	0.115	709
Benzofuran, 2,3-dihydro-2-methyl-	0.97	134.07	XIC(134.07Â±500ppm)	2087383	410	825	20.2513 min, 3.646 s	0.134	720
Benzene, 1,3-dimethoxy-	1.06	138.06	XIC(138.06Â±500ppm)	2992473	382	1634	20.2513 min, 3.682 s	0.132	796
Benzeneacetonitrile, a-methyl-	1.29	116.04	XIC(116.04Â±500ppm)	4814808	710	1228	20.2513 min, 4.103 s	0.159	902
Ethanone, 1-(2-methylphenyl)-	1.24	119.05	XIC(119.05Â±500ppm)	16116674	1353	2469	20.5014 min, 3.679 s	0.141	881
Benzaldehyde, 2,4-dimethyl-	1.03	133.06	XIC(133.06Â±500ppm)	3663377	585	1086	20.5847 min, 3.589 s	0.138	890
4,4-Dimethyl-2-propenylcyclopentanone	0.65	152.08	XIC(152.08Â±500ppm)	3116623	213	814	20.668 min, 3.445 s	0.132	759
2-Cyclohexen-1-one, 4,5-dimethyl-	1.27	82	XIC(82.00Â±500ppm)	1816121	759	523	20.668 min, 4.327 s	0.16	735
1H-Pyrrolo(2,3-c)pyridine	1.29	118.05	XIC(118.05Â±500ppm)	1381574	618	368	20.668 min, 4.481 s	0.159	815
Benzene, 2-ethenyl-1,3,5-trimethyl-	1.63	131.08	XIC(131.08Â±500ppm)	2413942	1150	727	20.8347 min, 2.813 s	0.124	884
Benzoic acid, 2-methyl-, methyl ester	2.61	119.05	XIC(119.05Â±500ppm)	2673135	339	528	20.8347 min, 3.386 s	0.14	765
Phenol, 2,3-dimethyl-	1.16	107.05	XIC(107.05Â±500ppm)	19842964	1149	1856	20.8347 min, 3.419 s	0.128	895
2-Methoxy-5-methylphenol	1.13	123.05	XIC(123.05Â±500ppm)	11709018	757	2551	20.8347 min, 3.454 s	0.131	753
Ethyl-2-benzofuran	1.07	131.05	XIC(131.05Â±500ppm)	13235609	1957	3092	20.9181 min, 3.316 s	0.129	871
1,11-Dodecadiene	1	55.07	XIC(55.07Â±500ppm)	2316851	385	349	21.0847 min, 2.028 s	0.084	906
Phenol, 2-ethyl-6-methyl-	1.16	121.06	XIC(121.06Â±500ppm)	10407788	946	1576	21.0847 min, 3.361 s	0.126	818
2,3-Pyridinedicarbonitrile	0.55	129.05	XIC(129.05Â±500ppm)	4402284	180	1261	21.0847 min, 3.974 s	0.132	779
1,2-Naphthalenedione	1.11	102.05	XIC(102.05Â±500ppm)	9397424	485	1461	21.0847 min, 4.280 s	0.144	943
1H-Indene, 2,3-dihydro-4,7-dimethyl-	1.01	131.08	XIC(131.08Â±500ppm)	11199176	1049	2036	21.1681 min, 2.932 s	0.122	869
Benzene, 1-methyl-3-(1-methyl-2-propenyl)-	0.83	131.08	XIC(131.08Â±500ppm)	1984449	532	427	21.2514 min, 2.927 s	0.155	744
2-Propenal, 3-(4-methylphenyl)-	1	131.05	XIC(131.05Â±500ppm)	1985799	421	512	21.2514 min, 3.945 s	0.174	754
Benzo[c]thiophene	1.07	134.01	XIC(134.01Â±500ppm)	22470256	1792	7008	21.2514 min, 4.109 s	0.141	933
Benzene, 1,1'-(1,5-hexadiene-1,6-diyl)bis-	0.86	117.07	XIC(117.07Â±500ppm)	2399601	365	754	21.4181 min, 2.970 s	0.125	709
Creosol	1.12	123.04	XIC(123.04Â±500ppm)	51553214	1429	5171	21.4181 min, 3.500 s	0.131	911
2-(1-Cyclopentenyl)furan	0.94	134.07	XIC(134.07Â±500ppm)	1949975	181	804	21.4181 min, 3.770 s	0.135	750
Pyrrolidine, 2,5-dimethyl-1-nitroso-	1.11	55.06	XIC(55.06Â±500ppm)	6292049	307	453	21.4181 min, 5.436 s	0.166	736
Benzene, (2-methyl-1-butenyl)-	1.34	131.08	XIC(131.08Â±500ppm)	689784	224	190	21.5014 min, 2.879 s	0.125	771
Benzene, 1-methoxy-4-(1-methylethyl)-	1.13	135.08	XIC(135.08Â±500ppm)	1326370	333	297	21.5848 min, 2.922 s	0.122	788
1H-Indene, 2,3-dihydro-1,3-dimethyl-	0.95	131.08	XIC(131.08Â±500ppm)	5871764	661	1263	21.5848 min, 3.011 s	0.126	847
2,5-Dimethylbenzoxazole	1.66	147.06	XIC(147.06Â±500ppm)	1084805	330	443	21.5848 min, 3.593 s	0.148	727
Benzene, 1-ethyl-2,4,5-trimethyl-	1.1	133.1	XIC(133.10Â±500ppm)	5067645	839	1140	21.6681 min, 2.765 s	0.119	822
Cinnamaldehyde, (E)-	0.51	131.05	XIC(131.05Â±500ppm)	1745942	311	508	21.6681 min, 3.956 s	0.129	889
Benzaldehyde, 4-methoxy-	1.18	136.05	XIC(136.05Â±500ppm)	1382958	313	311	21.6681 min, 4.122 s	0.142	834
Ethanediamide, n-dodecyl-N'-(2-thiazolyl)-	1.11	127.04	XIC(127.04Â±500ppm)	1632639	300	599	21.6681 min, 4.426 s	0.15	703
2-Propenenitrile, 3-phenyl-, (E)-	1.18	129.05	XIC(129.05Â±500ppm)	2284651	396	673	21.7515 min, 3.917 s	0.131	838
2H-Pyran-2-one, 4,6-dimethyl-	0.86	96.06	XIC(96.06Â±500ppm)	1145998	118	202	21.7515 min, 4.568 s	0.144	810
Benzofuran, 4,7-dimethyl-	1.09	146.07	XIC(146.07Â±500ppm)	14089702	3033	6689	21.8348 min, 3.296 s	0.127	843
Phenol, 3-ethyl-5-methyl-	1.1	121.06	XIC(121.06Â±500ppm)	7026321	514	1414	21.9181 min, 3.365 s	0.123	810
Benzoic acid, 3-methyl-, methyl ester	1.11	119.05	XIC(119.05Â±500ppm)	5351261	730	1164	22.0015 min, 3.443 s	0.123	922
2,4-Dimethylbenzonitrile	1.38	116.05	XIC(116.05Â±500ppm)	2807433	477	575	22.0015 min, 3.869 s	0.15	791
4,5,6,6a-Tetrahydro-2(1H)-pentalenone	0.46	94.04	XIC(94.04Â±500ppm)	492760	134	100	22.0015 min, 4.347 s	0.179	759
3-Dodecene, (Z)-	0.86	55.07	XIC(55.07Â±500ppm)	1487062	262	206	22.0848 min, 1.956 s	0.08	922
2-Hydroxy-3-propyl-2-cyclopenten-1-one	2.5	55.07	XIC(55.07Â±500ppm)	2027536	193	195	22.0848 min, 3.414 s	0.128	714
Acetic acid ethenyl ester	1.11	43.03	XIC(43.03Â±500ppm)	10544439	1225	669	22.2515 min, 5.166 s	0.183	818
Benzene, (ethenyloxy)-	1.15	120.05	XIC(120.05Â±500ppm)	7075813	1071	1183	22.3348 min, 3.503 s	0.121	723
2-Propenal, 3-(2-furanyl)-	1.31	122.03	XIC(122.03Â±500ppm)	3941256	730	962	22.3348 min, 5.061 s	0.173	791
2-Dodecene, (Z)-	0.34	55.07	XIC(55.07Â±500ppm)	994620	164	183	22.5015 min, 1.975 s	0.08	943
Tricyclo[4.2.1.1(2,5)]deca-3,7-diene-9,10-dione, (1a,2ÃŸ,5ÃŸ,6a)-	1.11	131.05	XIC(131.05Â±500ppm)	27572303	5996	3268	22.5849 min, 4.589 s	0.169	866
3,4-Anhydro-d-galactosan	1.03	43.04	XIC(43.04Â±500ppm)	947980	159	74	22.5849 min, 4.982 s	0.162	759
Cyclohexanone, 3-vinyl-3-methyl-	1.28	123.08	XIC(123.08Â±500ppm)	1279932	216	408	22.7515 min, 3.402 s	0.125	732
Furan, 3-phenyl-	0.98	115.05	XIC(115.05Â±500ppm)	1058886	406	251	22.7515 min, 3.642 s	0.118	799
Benzothiazole	1.99	135.01	XIC(135.01Â±500ppm)	1809178	390	367	22.7515 min, 4.615 s	0.177	748
2-Undecene, 2,5-dimethyl-	0.95	55.07	XIC(55.07Â±500ppm)	1226221	287	165	22.8349 min, 1.897 s	0.087	873
trans-1-Phenyl-1-pentene	1.09	117.07	XIC(117.07Â±500ppm)	1571660	441	476	22.8349 min, 2.863 s	0.099	878
Phenol, 2-propyl-	1.13	107.05	XIC(107.05Â±500ppm)	5247687	537	646	22.8349 min, 3.177 s	0.116	778
Indan, epoxide	1.41	104.06	XIC(104.06Â±500ppm)	1860744	481	333	22.8349 min, 4.277 s	0.146	850
Benzofuran, 2-ethenyl-	1.9	144.05	XIC(144.05Â±500ppm)	9033856	767	3506	22.9182 min, 3.515 s	0.14	820
Cyclododecene	1.07	54.06	XIC(54.06Â±500ppm)	847740	283	182	23.0016 min, 2.101 s	0.077	839
Nonanoic acid, methyl ester	1.15	74.04	XIC(74.04Â±500ppm)	700163	206	161	23.0016 min, 2.401 s	0.089	836
1H-Benzimidazole, 5,6-dimethyl-	1.03	131.05	XIC(131.05Â±500ppm)	4646454	843	1320	23.0016 min, 3.422 s	0.125	790
2,3'-Bifuran, octahydro-	1.3	71.05	XIC(71.05Â±500ppm)	10763465	1448	1435	23.0849 min, 3.995 s	0.156	749
Phenol, 2-(1-methylethyl)-	1.14	121.06	XIC(121.06Â±500ppm)	17362073	1539	2457	23.1682 min, 3.209 s	0.117	870
Azulene	0.55	128.06	XIC(128.06Â±500ppm)	1220428	157	388	23.1682 min, 3.244 s	0.113	730
Phenol, 2,3,5-trimethyl-	0.34	121.06	XIC(121.06Â±500ppm)	4996264	442	1150	23.1682 min, 3.499 s	0.123	885
m-Guaiacol	1.18	124.05	XIC(124.05Â±500ppm)	2400888	475	647	23.1682 min, 3.822 s	0.129	799
2-Coumaranone	1.06	78.05	XIC(78.05Â±500ppm)	4277169	366	201	23.2516 min, 4.638 s	0.144	846
Phenol, 2-ethyl-5-methyl-	1.09	121.06	XIC(121.06Â±500ppm)	5685575	711	1149	23.3349 min, 3.195 s	0.112	816
1H-Pyrrole-2,5-dione, 3-ethyl-4-methyl-	1.15	139.06	XIC(139.06Â±500ppm)	2285751	599	935	23.3349 min, 3.807 s	0.131	863
Quinoline	2.24	129.05	XIC(129.05Â±500ppm)	26785694	1292	1878	23.3349 min, 4.425 s	0.17	959
2,3-Dimethylbenzonitrile	1.38	116.05	XIC(116.05Â±500ppm)	2199874	601	554	23.4183 min, 3.892 s	0.141	741
Benzene, 1,4-dimethyl-2-(2-methylpropyl)-	1.82	119.08	XIC(119.08Â±500ppm)	474586	137	114	23.5016 min, 2.580 s	0.097	787
1H-Indene, 2,3-dihydro-1,1,3-trimethyl-	3.76	145.1	XIC(145.10Â±500ppm)	746641	212	432	23.5016 min, 2.776 s	0.122	814
2-Ethyl-1-H-indene	0.84	129.07	XIC(129.07Â±500ppm)	1337501	238	257	23.5016 min, 3.363 s	0.125	772
2-Methyl-5-hydroxybenzofuran	1.02	148.05	XIC(148.05Â±500ppm)	1638469	567	963	23.5016 min, 3.723 s	0.125	767
2(3H)-Furanone, dihydro-5-propyl-	1.14	85.03	XIC(85.03Â±500ppm)	5975922	1547	1312	23.5016 min, 5.162 s	0.175	776
2-Butanoyl-5-methylfuran	2.09	109.07	XIC(109.07Â±500ppm)	689625	225	176	23.5849 min, 3.088 s	0.131	717
Phenol, 4-ethyl-3-methyl-	1.12	121.06	XIC(121.06Â±500ppm)	43473626	3474	3655	23.5849 min, 3.274 s	0.116	887
1-Benzofuran-5-ol	1.16	134.03	XIC(134.03Â±500ppm)	1882557	766	585	23.5849 min, 3.947 s	0.14	828
Benzenepropanenitrile	1.37	91.05	XIC(91.05Â±500ppm)	53107115	4471	2597	23.5849 min, 4.559 s	0.165	892
3,4-Dimethoxytoluene	1.4	152.08	XIC(152.08Â±500ppm)	13932870	1138	2396	23.6683 min, 3.573 s	0.141	886
2-Butanone, 3-phenyl-	0.95	43.03	XIC(43.03Â±500ppm)	1655442	101	120	23.7516 min, 3.770 s	0.131	752
Naphthalene, decahydro-	1.36	138.06	XIC(138.06Â±500ppm)	1137875	404	456	23.835 min, 3.904 s	0.143	741
2,4-Dimethylfuran	1.17	43.03	XIC(43.03Â±500ppm)	3403169	361	253	23.9183 min, 4.803 s	0.155	735
Phenol, 2-ethyl-4,5-dimethyl-	2.1	135.04	XIC(135.04Â±500ppm)	3341298	400	754	24.0016 min, 3.482 s	0.119	750
2(3H)-Benzofuranone, 3-methyl-	1.08	120.06	XIC(120.06Â±500ppm)	2708116	384	531	24.0016 min, 4.200 s	0.136	892
Cyclopentene,1-heptyl-	0.97	67.06	XIC(67.06Â±500ppm)	487095	121	118	24.085 min, 2.173 s	0.076	831
6-Phenyl-n-hexanol	0.62	44	XIC(44.00Â±500ppm)	1927093	204	29	24.085 min, 2.764 s	0.102	703
Benzene, (1,3-dimethylbutyl)-	2.17	105.07	XIC(105.07Â±500ppm)	1347444	472	385	24.1683 min, 2.580 s	0.097	833
1H-Indene, 2,3-dimethyl-	1.08	129.07	XIC(129.07Â±500ppm)	13637649	899	1974	24.1683 min, 3.254 s	0.117	891
2-Naphthalenamine	1.23	143.03	XIC(143.03Â±500ppm)	1768417	472	789	24.335 min, 3.997 s	0.133	752
Isoquinoline	2.3	129.05	XIC(129.05Â±500ppm)	3326757	574	547	24.335 min, 4.426 s	0.168	900
Cyclopentane, 3-hexyl-1,1-dimethyl-	1.04	56.08	XIC(56.08Â±500ppm)	668352	163	150	24.4183 min, 1.914 s	0.076	898
1H-Pyrazole-3,4-diamine	1.73	44	XIC(44.00Â±500ppm)	4529534	230	108	24.4183 min, 3.613 s	0.049	717
Benzene, hexyl-	1.04	91.05	XIC(91.05Â±500ppm)	7745606	1488	839	24.5017 min, 2.579 s	0.092	928
3-Pyridinecarbonitrile, 1,4-dihydro-1-methyl-	1.1	119.08	XIC(119.08Â±500ppm)	594203	207	168	24.5017 min, 2.598 s	0.103	722
1-Acetoxy-1-phenylbut-2-yne	3.72	128.06	XIC(128.06Â±500ppm)	678649	169	248	24.5017 min, 2.965 s	0.106	719
Phenol, 4-propyl-	1.14	107.05	XIC(107.05Â±500ppm)	10768921	1488	1640	24.5017 min, 3.224 s	0.111	891
1H-1,2,4-Triazol-5-amine, 1-methyl-	1.29	43.04	XIC(43.04Â±500ppm)	19683122	4474	740	24.5017 min, 3.584 s	0.132	711
1,2-Propanediamine	1.48	44	XIC(44.00Â±500ppm)	4387750	152	107	24.5017 min, 3.613 s	0.048	850
Phenol, 4-ethyl-2-methoxy-	0.54	137.06	XIC(137.06Â±500ppm)	1646822	218	668	24.585 min, 3.416 s	0.115	783
Benzocycloheptatriene	0.42	141.07	XIC(141.07Â±500ppm)	3976250	352	1597	24.585 min, 3.596 s	0.132	853
1,2-Benzenedicarbonitrile	3.41	128.03	XIC(128.03Â±500ppm)	3797243	661	1075	24.7517 min, 5.251 s	0.19	924
Phenol, 3,4,5-trimethyl-, methylcarbamate	1.2	121.06	XIC(121.06Â±500ppm)	7595583	395	1202	24.835 min, 3.369 s	0.11	813
3,5-Dimethoxytoluene	1.14	152.08	XIC(152.08Â±500ppm)	8453751	1251	2233	24.835 min, 3.516 s	0.13	907
Propiophenone, 2'-methyl-	1.28	119.05	XIC(119.05Â±500ppm)	3590373	541	605	25.0017 min, 3.487 s	0.12	810
1-Naphthalenol	0.98	115.05	XIC(115.05Â±500ppm)	6171568	427	1087	25.0017 min, 3.967 s	0.13	888
Benzofuran-2-carboxaldehyde	1.18	146.03	XIC(146.03Â±500ppm)	1264779	543	501	25.0017 min, 4.443 s	0.157	722
Phenol, 2,4,6-trimethyl-	1.11	121.06	XIC(121.06Â±500ppm)	6469281	1138	1345	25.0851 min, 3.365 s	0.119	895
Octane, 2,3,7-trimethyl-	1.11	57.08	XIC(57.08Â±500ppm)	7641059	1733	905	25.1684 min, 1.791 s	0.078	886
Benzenepropanoic acid, methyl ester	1.53	104.06	XIC(104.06Â±500ppm)	1887919	472	422	25.2517 min, 3.501 s	0.123	771
1H-Inden-1-one, 2,3-dihydro-	1.25	104.06	XIC(104.06Â±500ppm)	35753733	2391	3694	25.2517 min, 4.658 s	0.166	911
Benzene, pentamethyl-	1.1	133.1	XIC(133.10Â±500ppm)	778001	257	269	25.3351 min, 3.020 s	0.116	721
1H-Pyrrole, 1-phenyl-	1.14	143.07	XIC(143.07Â±500ppm)	2209351	535	880	25.3351 min, 3.786 s	0.125	824
a-ACETYL-.DELTA.-VALEROLACTONE	1.11	43.03	XIC(43.03Â±500ppm)	7882634	608	359	25.3351 min, 5.454 s	0.202	781
1,2,3-Trimethylindene	1.32	143.08	XIC(143.08Â±500ppm)	1407455	460	628	25.4184 min, 3.068 s	0.118	790
1,13-Tetradecadiene	0.87	55.07	XIC(55.07Â±500ppm)	1586206	253	232	25.6684 min, 2.033 s	0.073	915
5-Isopropyl-2-methylphenethyl acetate	1.08	145.1	XIC(145.10Â±500ppm)	517568	189	224	25.6684 min, 2.895 s	0.113	705
Ethanone, 1-[4-(1-methylethenyl)phenyl]-	1.05	145.06	XIC(145.06Â±500ppm)	4092696	804	1062	25.6684 min, 3.237 s	0.12	796
1H-Inden-1-one, 2,3-dihydro-3-methyl-	1.14	131.05	XIC(131.05Â±500ppm)	8271327	1464	1118	25.6684 min, 4.237 s	0.157	837
4-tert-Butoxystyrene	1.13	120.05	XIC(120.05Â±500ppm)	3996463	1159	1212	25.7518 min, 3.565 s	0.115	771
Phenol, 3-methoxy-2-methyl-	1.64	138.06	XIC(138.06Â±500ppm)	1013352	531	442	25.7518 min, 3.748 s	0.136	704
6-Benzofuranylacetaldehyde	1.17	131.05	XIC(131.05Â±500ppm)	3268863	809	1029	25.9185 min, 3.216 s	0.111	861
Phenol, 2,3,4,6-tetramethyl-	1.11	135.08	XIC(135.08Â±500ppm)	2730733	521	672	26.0018 min, 3.295 s	0.117	738
1-Nonanol, 4,8-dimethyl-	1.12	56.08	XIC(56.08Â±500ppm)	4755667	1026	613	26.1685 min, 1.896 s	0.08	864
1H-Inden-1-one, 2,3-dihydro-3,3-dimethyl-	1.12	145.06	XIC(145.06Â±500ppm)	8869657	1177	3027	26.2518 min, 3.241 s	0.131	794
2-Tridecene, (Z)-	0.67	55.07	XIC(55.07Â±500ppm)	1671315	192	197	26.5852 min, 1.964 s	0.068	902
Naphthalene, 1-methyl-	1.06	142.07	XIC(142.07Â±500ppm)	142780853	6095	17184	26.5852 min, 3.892 s	0.144	931
3-Butyl-2-hydroxy-2-cyclopenten-1-one	1.2	112.05	XIC(112.05Â±500ppm)	465736	191	203	26.6685 min, 3.312 s	0.109	822
2-Ethyl-2,3-dihydro-1H-indene	0.52	131.05	XIC(131.05Â±500ppm)	942829	140	253	26.6685 min, 4.284 s	0.138	764
Benzaldehyde, 3-hydroxy-	1.14	122.03	XIC(122.03Â±500ppm)	1033144	258	307	26.7519 min, 4.050 s	0.129	778
5-Acetoxymethyl-2-furaldehyde	1.04	126.03	XIC(126.03Â±500ppm)	690816	209	320	26.7519 min, 4.235 s	0.131	801
Thymol	1.19	135.08	XIC(135.08Â±500ppm)	3001961	550	766	26.9185 min, 3.172 s	0.112	747
Quinoline, 6-methyl-	1.58	143.07	XIC(143.07Â±500ppm)	3123514	725	797	26.9185 min, 4.102 s	0.155	795
1,2,3-Trimethoxybenzene	1.37	168.07	XIC(168.07Â±500ppm)	1879793	406	902	27.0019 min, 3.882 s	0.147	812
2,5,6-Trimethylbenzimidazole	0.93	160.08	XIC(160.08Â±500ppm)	3258410	473	1542	27.0852 min, 3.287 s	0.116	772
3-Heptanone, 2,4-dimethyl-	1.39	71.05	XIC(71.05Â±500ppm)	3157318	961	750	27.0852 min, 3.785 s	0.162	717
1H-Inden-5-ol, 2,3-dihydro-	2.05	134.07	XIC(134.07Â±500ppm)	1484523	347	610	27.0852 min, 3.887 s	0.134	838
3-pyridinemethanol, a-(azidomethyl)-	1.09	108.04	XIC(108.04Â±500ppm)	4699460	608	990	27.0852 min, 4.030 s	0.131	751
7-Azaindole-3-carboxaldehyde	1.21	145.03	XIC(145.03Â±500ppm)	1207424	472	360	27.0852 min, 4.403 s	0.148	793
1-Methyl-2-n-hexylbenzene	1.08	105.07	XIC(105.07Â±500ppm)	584447	174	150	27.1686 min, 2.558 s	0.108	738
1,4-Benzodioxin, 2,3-dihydro-	1.45	108.02	XIC(108.02Â±500ppm)	1234276	187	358	27.1686 min, 5.180 s	0.201	732
3-Methoxy-5-methylphenol	1.11	138.06	XIC(138.06Â±500ppm)	1750381	412	641	27.3352 min, 3.744 s	0.123	860
Benzo[1,2-b:4,3-b']difuran	1.11	158.03	XIC(158.03Â±500ppm)	1347537	418	754	27.3352 min, 4.018 s	0.132	872
Benzene, 4-ethyl-1,2-dimethoxy-	1.32	151.07	XIC(151.07Â±500ppm)	2554189	1184	1021	27.4186 min, 3.444 s	0.128	835
Z-4-Tridecen-1-yl acetate	1.12	54.06	XIC(54.06Â±500ppm)	508681	186	130	27.5019 min, 2.094 s	0.068	837
Hex-1-enylbenzene	0.98	117.07	XIC(117.07Â±500ppm)	452992	173	140	27.5853 min, 2.808 s	0.087	808
2-Methyl-6-propylphenol	1.12	121.06	XIC(121.06Â±500ppm)	2627673	677	758	27.5853 min, 3.179 s	0.109	841
Cyclohexene, 3,4-diethenyl-1,6-dimethyl-	1.07	108.09	XIC(108.09Â±500ppm)	879476	269	262	27.6686 min, 2.537 s	0.119	703
1-Naphthalenol, 4-methyl-	0.82	158.07	XIC(158.07Â±500ppm)	1720931	396	1098	27.6686 min, 3.486 s	0.123	763
2-Propenal, 3-phenyl-	1.02	132.05	XIC(132.05Â±500ppm)	953437	239	402	27.6686 min, 4.093 s	0.132	785
1-Naphthalenol, 2-methyl-	0.51	158.07	XIC(158.07Â±500ppm)	890458	233	702	27.8353 min, 3.412 s	0.122	765
Cinnoline, 3,4-dimethyl-	0.77	158.07	XIC(158.07Â±500ppm)	2889571	332	1239	27.9186 min, 3.503 s	0.168	741
Benzene, 2,4-pentadiynyl-	1.06	140.06	XIC(140.06Â±500ppm)	2741733	633	1586	28.002 min, 4.028 s	0.136	882
Benzamide, 3-methyl-N-(2-phenylethyl)-N-ethyl-	1.3	119.08	XIC(119.08Â±500ppm)	730738	201	247	28.0853 min, 2.596 s	0.094	730
Naphthalene, 5-ethyl-1,2,3,4-tetrahydro-	0.99	131.07	XIC(131.07Â±500ppm)	454095	147	145	28.252 min, 3.089 s	0.107	762
1(3H)-Isobenzofuranone	1.22	105.03	XIC(105.02Â±500ppm)	5090207	958	926	28.252 min, 5.393 s	0.183	950
3-Buten-2-one, 3-methyl-4-phenyl-	1.05	160.08	XIC(160.08Â±500ppm)	2747672	482	1498	28.3353 min, 3.390 s	0.123	714
7-Methylindan-1-one	1.32	146.07	XIC(146.07Â±500ppm)	5870377	519	1240	28.3353 min, 4.295 s	0.153	849
Bicyclo[2.2.2]oct-5-ene, 2-methoxymethylene-	2.66	121.06	XIC(121.06Â±500ppm)	1474809	412	453	28.4187 min, 3.182 s	0.128	735
Cyclopentene, 1-octyl-	0.96	67.06	XIC(67.06Â±500ppm)	393066	109	105	28.5853 min, 2.168 s	0.078	837
(3-Methylphenyl) methanol, n-pentyl ether	0.96	106.07	XIC(106.07Â±500ppm)	423225	197	146	28.5853 min, 2.549 s	0.087	708
Naphthalene, 1,2-dihydro-1,1,6-trimethyl-	1.06	157.1	XIC(157.10Â±500ppm)	1363301	346	825	28.5853 min, 3.141 s	0.121	762
Phenol, 3-methoxy-2,5,6-trimethyl-	2.53	166.1	XIC(166.10Â±500ppm)	1551101	210	931	28.5853 min, 3.258 s	0.119	743
Durohydroquinone	0.48	166.1	XIC(166.10Â±500ppm)	1116687	127	663	28.5853 min, 3.409 s	0.121	744
Phenol, 2,6-dimethoxy-	1.12	154.06	XIC(154.06Â±500ppm)	66479509	1529	5260	28.5853 min, 4.206 s	0.142	892
Epi-Inositol	1.99	73.04	XIC(73.04Â±500ppm)	789707	101	323	28.5853 min, 6.121 s	0.046	715
2-Hexadecene, 3,7,11,15-tetramethyl-, [R-[R*,R*-(E)]]-	1.06	57.08	XIC(57.08Â±500ppm)	3753451	398	501	28.6687 min, 1.867 s	0.078	880
Benzene, 5-heptenyl-	1	91.05	XIC(91.05Â±500ppm)	506535	131	94	28.6687 min, 2.701 s	0.086	715
Naphthalene, 1,2,3,4-tetrahydro-1,6,8-trimethyl-	1.14	159.11	XIC(159.11Â±500ppm)	980581	305	469	28.752 min, 3.010 s	0.116	827
Eugenol	1.13	164.08	XIC(164.08Â±500ppm)	7872071	1829	2455	28.8354 min, 3.444 s	0.119	909
3-Butylisobenzofuran-1(3H)-one	1.32	105.03	XIC(105.03Â±500ppm)	2371638	655	439	28.9187 min, 4.864 s	0.171	755
Benzene, heptyl-	1.06	91.05	XIC(91.05Â±500ppm)	3235233	1090	465	29.002 min, 2.554 s	0.085	906
1H-Benzimidazole, 2-(1-methylethyl)-	1.06	160.09	XIC(160.09Â±500ppm)	930359	263	573	29.002 min, 3.480 s	0.116	712
6-Methoxy-3-methylbenzofuran	0.94	162.07	XIC(162.07Â±500ppm)	2821970	402	1571	29.002 min, 3.815 s	0.132	777
1-Undecene, 9-methyl-	0.64	70.08	XIC(70.08Â±500ppm)	473810	104	115	29.0854 min, 1.942 s	0.068	880
Phenol, 3,5-diethyl-	1.22	135.08	XIC(135.08Â±500ppm)	1062313	263	281	29.0854 min, 3.323 s	0.11	779
2(3H)-Naphthalenone, 4,4a,5,6-tetrahydro-7-methyl-	1.17	134.07	XIC(134.07Â±500ppm)	512004	198	209	29.1687 min, 4.142 s	0.139	753
Phenol, 2-methoxy-4-propyl-	1.11	137.06	XIC(137.06Â±500ppm)	13125356	1997	2893	29.2521 min, 3.251 s	0.111	888
Benzene, 4-ethenyl-1,2-dimethoxy-	1.11	164.08	XIC(164.08Â±500ppm)	2121590	335	990	29.3354 min, 3.699 s	0.122	871
d-Tyrosine	0.97	107.05	XIC(107.05Â±500ppm)	2976818	451	632	29.5021 min, 4.399 s	0.138	750
Copaene	1.68	119.08	XIC(119.08Â±500ppm)	305957	135	108	29.5854 min, 2.377 s	0.112	783
2,6-Dimethoxytoluene	3.45	152.08	XIC(152.08Â±500ppm)	596336	162	199	29.7521 min, 3.591 s	0.131	751
4-Iodo-3-methoxyamphetamine	1.33	44	XIC(44.00Â±500ppm)	3492306	121	87	29.8354 min, 3.591 s	0.047	743
Hydrocoumarin	1.11	120.06	XIC(120.06Â±500ppm)	1109528	641	360	29.8354 min, 5.022 s	0.163	855
1H-Indole, 4-methyl-	1.12	130.06	XIC(130.06Â±500ppm)	9423170	2054	1866	29.9188 min, 4.500 s	0.148	911
Phenol, 2-(2-pentyn-4-yl)-4-methyl-	1.07	159.08	XIC(159.08Â±500ppm)	1331016	342	874	30.0021 min, 3.148 s	0.118	785
Benzene, 4-(2-butenyl)-1,2-dimethyl-, (E)-	0.55	145.06	XIC(145.06Â±500ppm)	1249151	150	348	30.0855 min, 4.068 s	0.133	742
Naphthalene, 2-ethyl-	1.05	141.07	XIC(141.07Â±500ppm)	17005373	2589	3340	30.1688 min, 3.615 s	0.118	880
1,1'-Biphenyl, 2-methyl-	1.1	168.09	XIC(168.09Â±500ppm)	2584385	1137	1742	30.5022 min, 3.554 s	0.123	913
Vanillin	1.11	151.04	XIC(151.04Â±500ppm)	13989980	4269	2631	30.5022 min, 4.563 s	0.151	935
Coumarin	1.29	118.04	XIC(118.04Â±500ppm)	1131471	237	368	30.5022 min, 5.050 s	0.151	887
Naphthalene, 1,7-dimethyl-	1.08	156.09	XIC(156.09Â±500ppm)	19681947	2439	6577	30.5855 min, 3.607 s	0.121	933
Biphenylene	1.14	152.06	XIC(152.06Â±500ppm)	18412935	1499	3409	30.5855 min, 4.043 s	0.13	926
1H-Inden-1-one, 2,3-dihydro-3,4,7-trimethyl-	1.08	159.08	XIC(159.08Â±500ppm)	8817947	682	1935	30.7522 min, 3.128 s	0.111	778
2-Undecanone, 6,10-dimethyl-	2.23	43.04	XIC(43.04Â±500ppm)	380905	114	42	30.9189 min, 2.331 s	0.085	749
Bicyclo[7.2.0]undec-4-ene, 4,11,11-trimethyl-8-methylene-,[1R-(1R*,4Z,9S*)]-	0.42	41.05	XIC(41.05Â±500ppm)	824874	318	89	30.9189 min, 2.523 s	0.114	905
Benzene, 1,2,3-trimethoxy-5-methyl-	1.25	167.07	XIC(167.07Â±500ppm)	2696374	567	1017	30.9189 min, 3.635 s	0.136	849
Undecane, 3,5-dimethyl-	2.46	57.08	XIC(57.08Â±500ppm)	296739	122	69	31.0855 min, 1.830 s	0.09	791
Naphthalene, 1,2,3,4-tetrahydro-5,7-dimethyl-	0.45	145.06	XIC(145.06Â±500ppm)	985534	193	371	31.1689 min, 3.970 s	0.125	775
1,4-Benzenedicarboxaldehyde, 2-methyl-	1.73	148.05	XIC(148.05Â±500ppm)	826651	515	336	31.1689 min, 4.756 s	0.16	756
Bicyclo[3.1.1]hept-2-ene, 2,6-dimethyl-6-(4-methyl-3-pentenyl)-	1.22	93.07	XIC(93.07Â±500ppm)	1742613	346	392	31.3356 min, 2.373 s	0.102	870
Caryophyllene	0.78	41.05	XIC(41.05Â±500ppm)	5042085	1070	333	31.4189 min, 2.566 s	0.115	935
1H-Isoindole-1,3(2H)-dione, 2-methyl-	1.47	161.04	XIC(161.04Â±500ppm)	4022049	1451	1018	31.4189 min, 4.776 s	0.163	943
Tricyclo[2.2.1.0(2,6)]heptane, 1,7-dimethyl-7-(4-methyl-3-pentenyl)-, (-)-	1.07	94.08	XIC(94.08Â±500ppm)	336691	103	117	31.5022 min, 2.351 s	0.093	778
Benzene, 1-heptenyl-	0.95	117.07	XIC(117.07Â±500ppm)	335630	139	132	32.0023 min, 2.755 s	0.091	842
8,8-Dimethyl-7-methyleneoctahydro-1H-3a,6-methanoazulene	1.21	119.08	XIC(119.08Â±500ppm)	427416	172	133	32.3356 min, 2.543 s	0.092	746
4-Hydroxy-1-naphthaldehyde	1.06	171.04	XIC(171.04Â±500ppm)	693893	368	727	32.3356 min, 3.897 s	0.13	764
Acenaphthylene	1.07	152.06	XIC(152.06Â±500ppm)	314198304	5893	19087	32.3356 min, 4.420 s	0.152	961
3,5-Dimethoxy-4-hydroxytoluene	1.1	168.08	XIC(168.08Â±500ppm)	10675693	1667	2881	32.5857 min, 3.933 s	0.129	751
p-n-Butylacetophenone	1.09	161.06	XIC(161.06Â±500ppm)	1162381	299	594	32.669 min, 3.672 s	0.126	744
1-Hydroxy-1,2,3,4-tetrahydronaphthalene-8-carboxaldehyde	0.81	129.07	XIC(129.07Â±500ppm)	465290	168	140	32.7523 min, 4.581 s	0.154	727
Humulene	1.1	93.07	XIC(93.07Â±500ppm)	5389762	1023	1231	32.8357 min, 2.643 s	0.115	899
5,9-Undecadien-2-one, 6,10-dimethyl-	1.09	43.03	XIC(43.03Â±500ppm)	2429280	349	236	32.8357 min, 2.687 s	0.092	731
cis-ÃŸ-Farnesene	1.11	69.08	XIC(69.08Â±500ppm)	1436269	268	283	33.0024 min, 2.287 s	0.079	914
Cyclooctane, phenyl-	1.04	91.05	XIC(91.05Â±500ppm)	515668	113	71	33.0024 min, 2.657 s	0.085	786
Alloaromadendrene	1.16	41.05	XIC(41.05Â±500ppm)	2259945	404	136	33.0857 min, 2.641 s	0.112	902
Cyclohexene, 1-pentyl-	1.02	81.07	XIC(81.07Â±500ppm)	515288	114	127	33.3357 min, 2.223 s	0.105	754
Benzene, octyl-	1.08	92.06	XIC(92.06Â±500ppm)	2702880	815	734	33.3357 min, 2.512 s	0.082	930
1H-Indole-5-carboxaldehyde, 2,3-dihydro-1-methyl-	1.67	161.06	XIC(161.06Â±500ppm)	550838	161	245	33.3357 min, 4.136 s	0.144	703
3-Benzofurancarboxaldehyde, 2-methoxy-	1.19	176.08	XIC(176.08Â±500ppm)	1023055	414	660	33.4191 min, 3.724 s	0.134	749
Benzene, (1-methylheptyl)-	1.35	105.07	XIC(105.07Â±500ppm)	2596114	442	457	33.5024 min, 2.580 s	0.109	774
(4R,4aS,6S)-4,4a-Dimethyl-6-(prop-1-en-2-yl)-1,2,3,4,4a,5,6,7-octahydronaphthalene	0.92	91.05	XIC(91.05Â±500ppm)	451330	135	72	33.5024 min, 2.603 s	0.131	722
2-Pyrrolidinone, 5-(ethoxymethyl)-	1.18	84.04	XIC(84.04Â±500ppm)	4705432	1618	1365	33.5024 min, 2.641 s	0.086	756
1,1,4,5,6-Pentamethyl-2,3-dihydro-1H-indene	1.52	173.1	XIC(173.10Â±500ppm)	351191	150	258	33.5857 min, 3.021 s	0.11	712
Naphthalene, decahydro-4a-methyl-1-methylene-7-(1-methylethylidene)-, (4aR-trans)-	1.16	189.16	XIC(189.16Â±500ppm)	491782	257	448	33.7524 min, 2.564 s	0.1	767
1H-Inden-1-one, 2,3-dihydro-4,7-dimethyl-	1.13	160.09	XIC(160.09Â±500ppm)	894854	297	476	33.7524 min, 4.171 s	0.137	799
a-Cubebene	1.13	161.13	XIC(161.13Â±500ppm)	363638	161	221	33.8358 min, 2.586 s	0.112	736
Acenaphthene	1.08	153.07	XIC(153.07Â±500ppm)	6384157	1047	1740	33.8358 min, 4.238 s	0.133	939
Cyclopropane, 1-(1-methylethyl)-2-nonyl-	3.78	41.05	XIC(41.05Â±500ppm)	455431	125	45	33.9191 min, 1.994 s	0.138	736
1H-Indole, 1-ethyl-	1.07	130.06	XIC(130.06Â±500ppm)	1344583	374	542	33.9191 min, 4.332 s	0.134	782
Benzene, 1-(1,5-dimethyl-4-hexenyl)-4-methyl-	2.15	119.08	XIC(119.08Â±500ppm)	2303133	530	540	34.0858 min, 2.594 s	0.115	764
Naphthalene, 1-propyl-	1.09	141.07	XIC(141.07Â±500ppm)	1064621	310	396	34.0858 min, 3.471 s	0.108	729
Apocynin	1.06	151.04	XIC(151.04Â±500ppm)	3351513	522	925	34.0858 min, 4.415 s	0.136	861
1-Octanol, 2-methyl-	1.31	43.07	XIC(43.07Â±500ppm)	623295	183	63	34.1691 min, 1.959 s	0.091	735
Naphthalene, decahydro-4a-methyl-1-methylene-7-(1-methylethenyl)-, [4aR-(4aa,7a,8aÃŸ)]-	1.09	93.07	XIC(93.07Â±500ppm)	6446181	1119	1078	34.1691 min, 2.679 s	0.103	946
1-Naphthalenecarboxaldehyde	0.91	155.05	XIC(155.05Â±500ppm)	565366	186	263	34.1691 min, 4.594 s	0.134	761
3-Ethyl-1,2-dihydro-1-methyl-2-oxoquinoxaline	1	159.08	XIC(159.08Â±500ppm)	312495	150	155	34.2525 min, 3.025 s	0.09	717
1-Naphthalenecarbonitrile	1.67	153.05	XIC(153.05Â±500ppm)	16470876	2293	1908	34.2525 min, 4.768 s	0.167	925
Benzene, 1-methyl-4-(phenylmethyl)-	1.25	167.09	XIC(167.09Â±500ppm)	401601	187	273	34.4191 min, 3.427 s	0.112	803
Naphthalene, 1,2,3,4,4a,5,6,8a-octahydro-4a,8-dimethyl-2-(1-methylethenyl)-, [2R-(2a,4aa,8aÃŸ)]-	1.05	93.07	XIC(93.07Â±500ppm)	4255469	2168	918	34.5025 min, 2.653 s	0.101	908
Naphthalene, 1,4,6-trimethyl-	1.08	155.08	XIC(155.08Â±500ppm)	2774051	826	1114	34.6692 min, 3.476 s	0.119	862
2-Naphthalenecarboxaldehyde	1.26	127.05	XIC(127.05Â±500ppm)	2843943	660	703	34.7525 min, 4.725 s	0.157	874
Naphthalene, 2-(1-methylethyl)-	0.93	155.08	XIC(155.08Â±500ppm)	1911958	274	614	34.9192 min, 3.534 s	0.113	859
1H-Indole-2,3-dione, 1-methyl-, 3-hydrazone	1.27	175.06	XIC(175.06Â±500ppm)	1541352	422	583	34.9192 min, 4.426 s	0.153	724
ÃŸ-Bisabolene	1.04	69.08	XIC(69.08Â±500ppm)	2135730	606	548	35.0859 min, 2.416 s	0.079	917
Menadione	1.16	172.05	XIC(172.05Â±500ppm)	529290	135	290	35.1692 min, 4.656 s	0.138	880
(R,Z)-2-Methyl-6-(4-methylcyclohexa-1,4-dien-1-yl)hept-2-en-1-ol	3.81	119.08	XIC(119.08Â±500ppm)	283899	123	126	35.2525 min, 2.466 s	0.086	764
Sesquicineole	1.61	43.03	XIC(43.03Â±500ppm)	1068111	743	96	35.3359 min, 2.556 s	0.098	796
1-Indanone, 5,6-dimethyl-	1.06	117.07	XIC(117.07Â±500ppm)	417703	103	127	35.3359 min, 4.272 s	0.146	727
2-Naphthalenecarbonitrile	1.68	153.05	XIC(153.05Â±500ppm)	8639345	1960	1394	35.3359 min, 4.804 s	0.162	925
(-)-a-Panasinsen	0.76	44	XIC(44.00Â±500ppm)	640840	166	15	35.4192 min, 2.747 s	0.101	778
Naphthalene, 1,6,7-trimethyl-	2.07	170.11	XIC(170.11Â±500ppm)	1504108	420	906	35.5026 min, 3.560 s	0.116	881
Cyclohexene, 3-(1,5-dimethyl-4-hexenyl)-6-methylene-, [S-(R*,S*)]-	1.19	69.08	XIC(69.08Â±500ppm)	730989	194	173	35.6692 min, 2.488 s	0.082	894
Dodecanoic acid, methyl ester	1.1	74.04	XIC(74.04Â±500ppm)	402986	158	124	35.7526 min, 2.307 s	0.073	850
Bergamotol, Z-a-trans-	0.51	44	XIC(44.00Â±500ppm)	846470	101	17	35.8359 min, 2.644 s	0.099	766
Homovanillyl alcohol	1.08	137.06	XIC(137.06Â±500ppm)	7551626	1233	2070	35.9193 min, 4.292 s	0.138	723
1,1'-Biphenyl, 3-methyl-	1.99	168.09	XIC(168.09Â±500ppm)	1067766	306	564	36.1693 min, 3.727 s	0.157	713
1(2H)-Acenaphthylenone	1.06	168.05	XIC(168.05Â±500ppm)	4092553	475	1723	36.2526 min, 4.394 s	0.135	880
Naphthalene, 2,3,6-trimethyl-	1.07	170.11	XIC(170.11Â±500ppm)	4599387	638	1669	36.336 min, 3.647 s	0.131	899
4-Nitroguaiacol	1.45	169.04	XIC(169.03Â±500ppm)	823943	291	301	36.336 min, 4.578 s	0.15	826
Cyclohexene, 4-[(1E)-1,5-dimethyl-1,4-hexadien-1-yl]-1-methyl-	1.06	93.07	XIC(93.07Â±500ppm)	676295	263	262	36.4193 min, 2.465 s	0.083	854
1H-Phenalene	1.09	165.07	XIC(165.07Â±500ppm)	6737265	1100	2248	36.9193 min, 4.217 s	0.132	900
Benzene, nonyl-	1.08	92.06	XIC(92.06Â±500ppm)	1757203	622	470	37.4194 min, 2.481 s	0.078	917
Fluorene	1.05	165.07	XIC(165.07Â±500ppm)	2750923	739	1374	37.4194 min, 4.304 s	0.135	916
Azetidine, 1,1'-methylenebis[2-methyl-	1.15	84.04	XIC(84.04Â±500ppm)	1665329	836	609	37.5027 min, 2.592 s	0.083	770
Caryophyllene oxide	1.12	41.06	XIC(41.06Â±500ppm)	4417343	809	387	37.9194 min, 3.063 s	0.12	906
Cyclododecene, (Z)-	1.22	82.08	XIC(82.08Â±500ppm)	303770	128	111	38.0861 min, 2.000 s	0.097	764
1,1'-Biphenyl, 3,4'-dimethyl-	1.09	182.11	XIC(182.11Â±500ppm)	970777	254	629	38.0861 min, 3.524 s	0.108	864
Fluorene, 1,4-dihydro-	1.02	168.09	XIC(168.09Â±500ppm)	609033	276	470	38.1694 min, 4.080 s	0.123	754
1-Isopropenylnaphthalene	1.22	168.09	XIC(168.09Â±500ppm)	1214054	474	639	38.3361 min, 4.106 s	0.146	800
4,4'-Dimethylbiphenyl	2.44	182.1	XIC(182.10Â±500ppm)	959233	184	796	38.5028 min, 3.544 s	0.134	754
9H-Fluorene, 9-methyl-	1.06	165.07	XIC(165.07Â±500ppm)	3281555	680	1389	38.5028 min, 4.008 s	0.127	899
Phenol, 2,6-dimethoxy-4-(2-propenyl)-	1.07	194.1	XIC(194.10Â±500ppm)	1442230	435	1058	38.7528 min, 3.762 s	0.121	888
3-Hexadecene, (Z)-	1.28	55.07	XIC(55.07Â±500ppm)	412444	107	87	38.8362 min, 1.950 s	0.063	927
(1-Cyclopropyl-ethylidene)-(2,3-diphenyl-aziridin-1-yl)-amine	1.07	180.09	XIC(180.09Â±500ppm)	352410	154	258	38.8362 min, 3.747 s	0.106	701
(1R,3E,7E,11R)-1,5,5,8-Tetramethyl-12-oxabicyclo[9.1.0]dodeca-3,7-diene	1.01	43.04	XIC(43.04Â±500ppm)	1209743	528	120	38.9195 min, 3.130 s	0.122	879
6H-Dibenzo[b,d]-pyran	1.04	182.07	XIC(182.07Â±500ppm)	5006534	686	2486	39.1695 min, 3.944 s	0.122	891
Dibenzofuran, 4-methyl-	1.11	182.07	XIC(182.07Â±500ppm)	7140765	1142	3471	39.5862 min, 3.954 s	0.127	851
11,11-Dimethyl-4,8-dimethylenebicyclo[7.2.0]undecan-3-ol	1.24	41.06	XIC(41.06Â±500ppm)	304296	120	31	40.0029 min, 3.091 s	0.119	816
9H-Xanthene	1.05	182.07	XIC(182.07Â±500ppm)	1396959	390	866	40.0029 min, 4.118 s	0.128	791
[1,1'-Biphenyl]-4-carboxaldehyde	1.11	182.07	XIC(182.07Â±500ppm)	1684960	231	1019	40.3363 min, 4.131 s	0.135	846
2-Hydroxyfluorene	0.97	182.07	XIC(182.07Â±500ppm)	523122	207	389	40.5863 min, 4.173 s	0.141	810
Decane, 3,3,5-trimethyl-	1.93	43.07	XIC(43.07Â±500ppm)	353301	145	45	40.753 min, 1.860 s	0.075	814
Benzaldehyde, 4-hydroxy-3,5-dimethoxy-	1.13	182.06	XIC(182.06Â±500ppm)	1196015	270	497	40.8363 min, 4.753 s	0.14	868
11-Tricosene	1.58	57.08	XIC(57.08Â±500ppm)	232248	102	67	41.0863 min, 1.891 s	0.093	808
Hexadecane, 3-methyl-	0.87	57.08	XIC(57.08Â±500ppm)	369470	156	125	41.253 min, 1.863 s	0.063	880
Benzene, decyl-	1.07	92.06	XIC(92.06Â±500ppm)	1330566	265	299	41.253 min, 2.459 s	0.074	841
8-Heptadecene	2.33	55.07	XIC(55.07Â±500ppm)	1302577	154	196	41.6697 min, 1.957 s	0.063	921
a-Bisabolol	1.25	43.04	XIC(43.04Â±500ppm)	742248	124	63	41.6697 min, 2.766 s	0.091	870
Phenanthrene, 9,10-dihydro-	0.31	180.09	XIC(180.09Â±500ppm)	183668	103	133	41.6697 min, 4.383 s	0.128	850
9H-Fluorene, 4-methyl-	1.01	165.07	XIC(165.07Â±500ppm)	3429244	297	1112	41.9197 min, 4.063 s	0.164	907
9H-Fluorene, 2-methyl-	1.09	165.07	XIC(165.07Â±500ppm)	1384422	460	705	42.1698 min, 4.139 s	0.127	899
9H-Fluorene, 2,3-dimethyl-	1.12	179.08	XIC(179.08Â±500ppm)	472603	173	292	42.5865 min, 3.837 s	0.128	829
Methyl tetradecanoate	1.2	74.04	XIC(74.04Â±500ppm)	283176	128	105	43.1698 min, 2.261 s	0.063	816
Naphtho[2,1-b]furan, 1,2-dimethyl-	1.12	181.07	XIC(181.07Â±500ppm)	725693	277	423	43.2532 min, 3.778 s	0.116	736
9H-Fluoren-9-one	1.33	180.06	XIC(180.05Â±500ppm)	4480247	3119	1293	43.2532 min, 4.866 s	0.157	954
Decane, 5-propyl-	1.25	57.08	XIC(57.08Â±500ppm)	1386851	213	251	43.8366 min, 1.850 s	0.072	840
Phenol, 4-(2-phenylethenyl)-, (E)-	1.6	196.09	XIC(196.09Â±500ppm)	775638	376	677	43.9199 min, 3.795 s	0.142	714
Phenanthrene	1.15	178.08	XIC(178.08Â±500ppm)	58231251	2376	9205	44.67 min, 4.771 s	0.146	946
Benzene, undecyl-	1.13	92.06	XIC(92.06Â±500ppm)	537381	213	185	45.0033 min, 2.426 s	0.074	894
Bis(1-chloro-2-propyl)(3-chloro-1-propyl)phosphate	1.6	41.05	XIC(41.05Â±500ppm)	1289257	224	106	45.8367 min, 3.500 s	0.155	718
Hexadecane, 2,6,10,14-tetramethyl-	1.48	57.08	XIC(57.08Â±500ppm)	1263878	870	282	46.0867 min, 1.806 s	0.064	917
Neophytadiene	1.04	68.07	XIC(68.07Â±500ppm)	829194	407	313	47.0868 min, 1.957 s	0.062	914
2-Pentadecanone, 6,10,14-trimethyl-	1.11	43.05	XIC(43.05Â±500ppm)	2830722	635	279	47.2535 min, 2.191 s	0.07	905
1H-Indene, 1-(phenylmethylene)-	1.03	204.09	XIC(204.09Â±500ppm)	666566	302	654	47.5035 min, 4.437 s	0.13	928
Anthracene, 2-methyl-	1.11	192.09	XIC(192.09Â±500ppm)	761510	335	643	48.5869 min, 4.465 s	0.134	895
1-Nonadecene	0.95	43.07	XIC(43.07Â±500ppm)	761956	237	94	48.9203 min, 1.926 s	0.058	933
4H-Cyclopenta[def]phenanthrene	1.13	190.08	XIC(190.08Â±500ppm)	1046879	354	762	49.2537 min, 4.854 s	0.142	886
Anthracene, 1-methyl-	0.99	192.09	XIC(192.09Â±500ppm)	473318	152	373	49.5037 min, 4.688 s	0.141	889
1,2-Benzenedicarboxylic acid, butyl 2-ethylhexyl ester	1.12	149.02	XIC(149.02Â±500ppm)	14276645	3602	4427	49.587 min, 3.280 s	0.109	915
Diphenyl sulfone	1.3	125	XIC(125.00Â±500ppm)	4268982	1405	1637	49.587 min, 5.614 s	0.185	881
3-methoxy-4-hydroxy-methyl-nitrostyrene	2.25	41.04	XIC(41.04Â±500ppm)	792342	114	70	49.6704 min, 4.416 s	0.161	861
Phthalic acid, 8-bromoctyl isobutyl ester	1.16	149.02	XIC(149.02Â±500ppm)	3806221	1363	2037	50.2537 min, 3.137 s	0.108	808
1,2-Benzenedicarboxylic acid, butyl octyl ester	1.14	149.02	XIC(149.02Â±500ppm)	4103239	1619	2298	51.7539 min, 3.182 s	0.106	859
5-Eicosene, (E)-	1.06	43.07	XIC(43.07Â±500ppm)	381954	201	64	52.0872 min, 1.924 s	0.056	944
Fluoranthene	1.16	202.08	XIC(202.08Â±500ppm)	3454207	338	1416	53.6707 min, 5.049 s	0.149	953
4,4'-(Hexafluoroisopropylidene)diphenol	0.93	267.07	XIC(267.07Â±500ppm)	360190	102	420	53.8374 min, 3.618 s	0.091	846

## Sheet: Melia azedarach (SPE4)
Name	Tailing.Factor	Base.Mass	Quant.Masses	Area	Peak.S.N	Quant.S.N	R.T...min.	FWHH..s.	Similarity
1,3-Dioxolane, 2-ethyl-	3.09	73.06	XIC(73.06Â±500ppm)	260678741	736	10257	3.5 min, 4.145 s	0.307	855
1-Butanol	1.11	56.08	XIC(56.08Â±500ppm)	7187630	1001	797	3.66668 min, 1.662 s	0.085	806
Pyrazine	1.32	80.04	XIC(80.04Â±500ppm)	119262137	7374	8560	3.75002 min, 2.121 s	0.114	953
1-Butanol, 3-methyl-	0.85	43.05	XIC(43.05Â±500ppm)	3354636	534	84	3.83336 min, 1.687 s	0.104	858
Thiazole	1.44	85	XIC(85.00Â±500ppm)	2143668	813	975	3.83336 min, 2.173 s	0.115	721
Hexane, 3-methoxy-	0.66	45.05	XIC(45.05Â±500ppm)	143519190	1567	3015	3.9167 min, 1.525 s	0.117	756
1-Methylcyclohexa-1,3-diene	1.23	79.06	XIC(79.06Â±500ppm)	6594087	1184	829	3.9167 min, 1.644 s	0.09	830
3-Penten-2-one, (E)-	1.26	69.04	XIC(69.04Â±500ppm)	56718680	4921	6275	3.9167 min, 1.955 s	0.103	897
But-3-enyl ethyl carbonate	0.97	54.06	XIC(54.06Â±500ppm)	3823573	265	586	4.00004 min, 2.086 s	0.154	723
Pyridine	2.23	79.04	XIC(79.03Â±500ppm)	190299726	10735	6479	4.00004 min, 2.122 s	0.141	940
Furan, 2-methyl-	1.64	53.06	XIC(53.06Â±500ppm)	16130386	1569	1730	4.08338 min, 2.088 s	0.1	800
2-Pentenal, (E)-	2.92	55.07	XIC(55.07Â±500ppm)	8349263	911	1450	4.16672 min, 2.009 s	0.095	846
Pyrrole	1.13	67.05	XIC(67.05Â±500ppm)	10295563	1720	2022	4.16672 min, 2.136 s	0.102	782
1,4-Cyclohexadiene, 1-methyl-	1.19	79.06	XIC(79.06Â±500ppm)	3169939	546	424	4.25006 min, 1.708 s	0.108	836
2-Butenoic acid, methyl ester	1.24	69.04	XIC(69.04Â±500ppm)	8676841	1662	1854	4.3334 min, 1.941 s	0.099	844
1,2-Ethanediamine, N,N-diethyl-	1.14	86.04	XIC(86.04Â±500ppm)	24413563	3246	8190	4.3334 min, 2.411 s	0.12	816
1-Hydroxy-2-butanone	1.57	57.05	XIC(57.05Â±500ppm)	209307392	6597	9351	4.41674 min, 2.196 s	0.13	926
Heptane, 3-methyl-	1.09	43.07	XIC(43.07Â±500ppm)	20397994	585	1031	4.41674 min, 6.485 s	0.089	736
1-Penten-3-one, 2-methyl-	0.76	41.06	XIC(41.06Â±500ppm)	7137435	871	396	4.50008 min, 1.898 s	0.103	844
2(5H)-Furanone	1.17	55.04	XIC(55.04Â±500ppm)	4488378	1015	357	4.58342 min, 2.563 s	0.116	817
Butanoic acid	1.2	60.03	XIC(60.03Â±500ppm)	147624118	4023	3987	4.7501 min, 1.801 s	0.098	932
2-Furanol, tetrahydro-	1.39	42.06	XIC(42.06Â±500ppm)	75736828	1745	1151	4.7501 min, 2.150 s	0.125	835
Ethanol	6.92	45.05	XIC(45.05Â±500ppm)	1758788	107	84	4.7501 min, 6.249 s	0.068	847
3-Hexanone	0.65	43.07	XIC(43.07Â±500ppm)	20867745	628	942	4.83344 min, 1.926 s	0.1	874
Furan, 2,3-dihydro-4-methyl-	1.07	84.06	XIC(84.06Â±500ppm)	7107882	761	1509	4.83344 min, 2.228 s	0.11	821
Cyclopentanone	1.19	55.04	XIC(55.04Â±500ppm)	132083963	5759	8751	4.91678 min, 2.434 s	0.136	926
Cyclohexane, 1,2-dimethyl-, trans-	1.41	55.07	XIC(55.07Â±500ppm)	7312529	3321	709	5.08346 min, 1.649 s	0.147	879
Propanenitrile, 3,3'-oxybis-	1.3	84.02	XIC(84.02Â±500ppm)	111743083	20316	8658	5.08346 min, 2.832 s	0.14	757
(2,3,3-Trimethyloxiranyl)methanol	0.42	43.04	XIC(43.04Â±500ppm)	9485724	1711	410	5.25014 min, 2.223 s	0.136	724
2-Pentenal, 2-methyl-	0.77	98.07	XIC(98.07Â±500ppm)	1434818	809	572	5.66684 min, 2.186 s	0.159	712
Diethylcyanamide	0.77	55.07	XIC(55.07Â±500ppm)	1105564	238	164	5.75018 min, 2.049 s	0.172	723
Oxalic acid, pentyl propyl ester	1.22	43.07	XIC(43.07Â±500ppm)	16526678	279	577	5.75018 min, 2.315 s	0.146	845
Pyridine, 2-methyl-	2.3	93.05	XIC(93.05Â±500ppm)	60508133	3002	4145	5.75018 min, 2.362 s	0.153	945
Crotonic acid	1.02	41.06	XIC(41.06Â±500ppm)	5263159	638	198	5.83352 min, 2.021 s	0.1	736
Pyrazine, methyl-	1.57	94.05	XIC(94.05Â±500ppm)	144887813	6107	7077	5.83352 min, 2.532 s	0.144	929
Furan-2-carbonyl chloride, tetrahydro-	1.8	71.06	XIC(71.06Â±500ppm)	26244463	1084	3953	6.0002 min, 2.619 s	0.143	831
2-Hydroxy-2,5-dimethyl-hept-6-en-3-one	1.38	59.06	XIC(59.06Â±500ppm)	7324214	1661	1966	6.08354 min, 2.206 s	0.147	725
2-Cyclopenten-1-one	1.55	82.04	XIC(82.04Â±500ppm)	332790361	8112	17698	6.08354 min, 3.050 s	0.182	842
3-Methylenecycloheptene	1.14	93.07	XIC(93.07Â±500ppm)	756977	241	193	6.16688 min, 1.903 s	0.127	772
4-Hexen-3-one	1.39	69.04	XIC(69.04Â±500ppm)	22585539	656	3533	6.16688 min, 2.302 s	0.123	865
Furan, 2-methoxy-	2.4	83.05	XIC(83.05Â±500ppm)	16502470	470	3601	6.33356 min, 2.351 s	0.196	800
1,5-Dimethyl-1,4-cyclohexadiene	1.16	93.07	XIC(93.07Â±500ppm)	2459066	421	589	6.4169 min, 1.924 s	0.111	798
Isoamyl cyanide	0.69	55.06	XIC(55.06Â±500ppm)	25497007	532	2308	6.4169 min, 2.449 s	0.198	732
Cyclopentanone, 3-methyl-	1.11	69.04	XIC(69.04Â±500ppm)	10108891	677	1507	6.50024 min, 2.590 s	0.138	857
3-Pentenoic acid, methyl ester	4.16	55.07	XIC(55.07Â±500ppm)	1987841	260	293	6.58358 min, 2.222 s	0.146	737
Butanoic acid, 2-methyl-	1.65	74.04	XIC(74.04Â±500ppm)	4821782	691	710	6.66692 min, 1.933 s	0.119	839
1,2-Ethanediol, monoacetate	1.26	43.03	XIC(43.03Â±500ppm)	41843346	2579	1622	6.66692 min, 2.694 s	0.133	960
2-Hexenal, (E)-	1.01	41.05	XIC(41.05Â±500ppm)	1529196	100	113	6.75026 min, 2.376 s	0.111	770
2-Furanmethanol	1.23	98.03	XIC(98.03Â±500ppm)	167936150	5148	9160	6.8336 min, 2.677 s	0.154	883
1H-Imidazole-4-ethanamine, ÃŸ-methyl-	1.31	95.01	XIC(95.01Â±500ppm)	9506399	1001	779	6.91694 min, 2.671 s	0.155	759
2-Butanone	0.84	43.04	XIC(43.04Â±500ppm)	4676235	254	150	6.91694 min, 3.266 s	0.144	738
Pyridine, 3-methyl-	2.75	93.06	XIC(93.06Â±500ppm)	53165523	1108	2744	7.08362 min, 2.702 s	0.16	894
2-Pentenoic acid, methyl ester, (E)-	1.19	83.05	XIC(83.05Â±500ppm)	2106341	343	446	7.2503 min, 2.338 s	0.12	784
1,3-Pentadiene, 2,3-dimethyl-	1.38	81.04	XIC(81.04Â±500ppm)	23506697	2084	2028	7.2503 min, 2.916 s	0.161	802
5-Hepten-2-one	0.84	43.03	XIC(43.03Â±500ppm)	4680755	219	212	7.41698 min, 2.292 s	0.158	758
Phenylethyne	1.12	102.05	XIC(102.05Â±500ppm)	3434113	768	1615	7.50032 min, 2.559 s	0.127	716
1,4-Hexadiene, 2-methyl-	1.25	81.04	XIC(81.04Â±500ppm)	14706826	1070	1724	7.58366 min, 2.967 s	0.154	806
4-Cyclopentene-1,3-dione	1.12	96.02	XIC(96.02Â±500ppm)	9041440	1677	1139	7.58366 min, 3.951 s	0.167	926
2H-Pyran-3(4H)-one, dihydro-	2.77	42.05	XIC(42.05Â±500ppm)	11562288	669	459	7.75034 min, 3.201 s	0.151	873
2,6-Lutidine	1.91	107.07	XIC(107.07Â±500ppm)	8134298	865	1794	8.00036 min, 2.550 s	0.166	740
2-Butenal, 2-ethenyl-	1.1	67.07	XIC(67.07Â±500ppm)	4951792	677	948	8.00036 min, 2.922 s	0.157	835
2-Heptanone	1.06	43.04	XIC(43.04Â±500ppm)	9619892	917	348	8.0837 min, 2.270 s	0.113	919
Methylenecyclopropanecarboxylic acid	8.1	98.03	XIC(98.03Â±500ppm)	630913	116	236	8.0837 min, 2.433 s	0.105	747
Cyclopentanone, 2-methyl-	1.24	55.04	XIC(55.04Â±500ppm)	13058887	1099	1129	8.0837 min, 3.041 s	0.175	791
5-Hexen-2-one, 5-methyl-	4.61	43.04	XIC(43.04Â±500ppm)	2647147	144	140	8.25038 min, 2.424 s	0.118	718
Cyclopropanecarboxamide, N-(2-octyl)	1.18	69.04	XIC(69.04Â±500ppm)	2568136	586	509	8.41706 min, 2.898 s	0.149	708
Glutaraldehyde	1.17	44.04	XIC(44.04Â±500ppm)	9440352	364	151	8.41706 min, 3.357 s	0.192	714
Furan, 2-ethyl-5-methyl-	1.19	95.01	XIC(95.01Â±500ppm)	10996933	1318	2475	8.5004 min, 3.067 s	0.146	870
Pyridine, 2-ethyl-	2.24	106.06	XIC(106.06Â±500ppm)	14221095	915	1863	8.66708 min, 2.680 s	0.158	811
Uracil	4.28	40.05	XIC(40.05Â±500ppm)	2200880	599	189	8.66708 min, 2.979 s	0.155	712
Ethanone, 1-(2-furanyl)-	1.28	95.01	XIC(95.01Â±500ppm)	209401416	3758	9423	8.75042 min, 3.187 s	0.164	903
Pyrazine, 2,6-dimethyl-	1.69	108.07	XIC(108.07Â±500ppm)	14347894	312	2449	8.83376 min, 2.881 s	0.209	872
Methyl acetoxyacetate	1.52	43.03	XIC(43.03Â±500ppm)	36991364	1591	1407	8.83376 min, 2.984 s	0.155	936
2-Amino-4-methyl-oxazole	1.11	42.03	XIC(42.03Â±500ppm)	13984790	393	322	8.83376 min, 3.712 s	0.158	806
Butanoic acid, 4-hydroxy-	1.29	42.06	XIC(42.06Â±500ppm)	260572140	7311	4127	8.83376 min, 4.485 s	0.202	931
Pyrazole, 1,4-dimethyl-	1.21	96.02	XIC(96.02Â±500ppm)	1535904	350	337	8.9171 min, 2.358 s	0.104	738
Pyrazine, ethyl-	1.71	107.06	XIC(107.06Â±500ppm)	60785327	2688	4409	8.9171 min, 2.873 s	0.16	940
1H-Tetrazaborole, 4,5-dihydro-1,4-dimethyl-	1.45	42.04	XIC(42.04Â±500ppm)	2663649	221	88	8.9171 min, 3.671 s	0.16	761
2H-Tetrazole, 2,5-dimethyl-	1.26	42.05	XIC(42.05Â±500ppm)	2219669	422	54	9.08378 min, 3.665 s	0.174	722
Pyrazine, 2,3-dimethyl-	0.89	67.05	XIC(67.05Â±500ppm)	6088841	525	827	9.16712 min, 2.927 s	0.205	782
Cyclopentanone, 3,4-bis(methylene)-	1.2	79.06	XIC(79.06Â±500ppm)	6660150	982	684	9.25046 min, 3.020 s	0.167	755
2-Cyclopenten-1-one, 2-hydroxy-	1.22	98.03	XIC(98.03Â±500ppm)	9620901	4182	2162	9.25046 min, 3.352 s	0.144	887
Butanoic acid, 4-hydroxy-2-methylene-	1.24	40.05	XIC(40.05Â±500ppm)	8658063	632	365	9.3338 min, 3.568 s	0.161	715
Hexanoic acid, methyl ester	1.27	74.04	XIC(74.04Â±500ppm)	2693544	275	293	9.41714 min, 2.245 s	0.108	768
Pyrazine, ethenyl-	1.42	106.05	XIC(106.05Â±500ppm)	4613563	904	1140	9.50048 min, 3.160 s	0.152	859
2,5-Hexanedione	1.24	43.04	XIC(43.04Â±500ppm)	30436097	2032	1028	9.50048 min, 3.465 s	0.175	830
2-Cyclohexen-1-one	1.23	68.04	XIC(68.04Â±500ppm)	37517279	2324	3603	9.58382 min, 3.542 s	0.18	858
Pyridine, 2,5-dimethyl-	2.64	107.07	XIC(107.07Â±500ppm)	20612542	1302	2169	9.66716 min, 2.813 s	0.164	925
1H-Pyrazole, 1,3,5-trimethyl-	0.47	67.07	XIC(67.07Â±500ppm)	1039688	148	205	9.66716 min, 2.964 s	0.151	708
Pyridine, 2-ethenyl-	1.67	105.06	XIC(105.06Â±500ppm)	5244211	1259	983	9.66716 min, 3.095 s	0.157	883
6-Hepten-3-one, 4-methyl-	1.19	57.05	XIC(57.05Â±500ppm)	3481088	1091	856	9.7505 min, 2.326 s	0.138	823
2-Hexene, 2,4-dimethyl-	4.04	83.05	XIC(83.05Â±500ppm)	1630961	626	544	9.83384 min, 2.580 s	0.123	795
2-Cyclopenten-1-one, 3,4-dimethyl-	1.16	67.07	XIC(67.07Â±500ppm)	24624005	1430	1983	9.83384 min, 2.973 s	0.162	855
N-Methylmaleimide	1.23	54.03	XIC(54.03Â±500ppm)	2739864	432	495	9.83384 min, 3.890 s	0.172	880
2(5H)-Furanone, 5-methyl-	1.18	55.04	XIC(55.04Â±500ppm)	44949950	4737	2835	10.0005 min, 4.120 s	0.179	870
Pyridine, 2,3-dimethyl-	2.46	107.07	XIC(107.07Â±500ppm)	7034015	593	1038	10.2505 min, 2.927 s	0.176	754
2-Furanmethanediol, dipropionate	1.16	96.02	XIC(96.02Â±500ppm)	661873	221	178	10.5839 min, 2.152 s	0.09	709
Pyridine, 2-(1-methylethyl)-	2.3	106.07	XIC(106.07Â±500ppm)	1636339	425	418	10.5839 min, 2.687 s	0.174	823
2(3H)-Furanone, dihydro-5-methyl-	1.24	56.06	XIC(56.06Â±500ppm)	8846835	1579	811	10.5839 min, 4.146 s	0.184	896
1H-Imidazole-2-methanol	1.23	41.06	XIC(41.06Â±500ppm)	304254	129	22	10.6672 min, 2.105 s	0.11	750
3-Ethylcyclopentanone	1.21	83.05	XIC(83.05Â±500ppm)	822011	185	263	10.6672 min, 2.957 s	0.16	720
Pyridine, 3-ethyl-	2.61	92.05	XIC(92.05Â±500ppm)	2386944	339	413	10.7506 min, 3.036 s	0.158	891
4(3H)-Pyrimidinone, 3-methyl-	1.04	110.04	XIC(110.04Â±500ppm)	11114905	874	3397	10.7506 min, 3.528 s	0.154	710
3-Pentenoic acid, 4-methyl-, methyl ester	0.97	69.04	XIC(69.04Â±500ppm)	3212394	283	603	10.8339 min, 3.235 s	0.157	730
2,3-Pentanedione	1.09	57.05	XIC(57.05Â±500ppm)	61914713	2745	7691	11.0006 min, 3.225 s	0.143	803
Pyridine, 2-ethyl-6-methyl-	0.66	120.08	XIC(120.08Â±500ppm)	3473247	232	1107	11.0839 min, 2.721 s	0.135	811
2-Butanone, 1-(acetyloxy)-	1.2	43.03	XIC(43.03Â±500ppm)	64947378	5340	1608	11.1673 min, 3.227 s	0.154	878
Octane, 2,3,7-trimethyl-	0.7	57.09	XIC(57.09Â±500ppm)	435709	116	87	11.2506 min, 1.749 s	0.092	763
2-Cyclopenten-1-one, 3,4,4-trimethyl-	0.92	44	XIC(44.00Â±500ppm)	3399564	305	53	11.2506 min, 2.760 s	0.181	702
2H-Pyran-2-one	1.29	68.04	XIC(68.04Â±500ppm)	28424351	4899	2605	11.2506 min, 4.517 s	0.178	826
Methyl 2-furoate	1.17	95.01	XIC(95.01Â±500ppm)	68450085	4887	8229	11.5006 min, 3.395 s	0.152	916
4-Methyl-5H-furan-2-one	0.99	41.05	XIC(41.05Â±500ppm)	41646868	5860	1705	11.584 min, 4.405 s	0.182	834
Pentanoic acid, 4-oxo-, methyl ester	0.99	43.04	XIC(43.04Â±500ppm)	11461870	505	451	12.084 min, 3.489 s	0.147	869
Benzene, 2-propenyl-	1.11	117.07	XIC(117.07Â±500ppm)	13402402	1143	3216	12.2507 min, 2.754 s	0.129	918
3-Methylene-2-norbornanone	1.2	79.06	XIC(79.06Â±500ppm)	2759547	356	396	12.2507 min, 2.993 s	0.171	710
4,4-Dimethyl-2-cyclopenten-1-one	1.35	95.05	XIC(95.05Â±500ppm)	20663580	897	1939	12.2507 min, 3.372 s	0.165	829
Benzofuran	1.07	118.04	XIC(118.04Â±500ppm)	33315860	1282	11065	12.334 min, 3.212 s	0.139	939
2-Furanmethanol, acetate	2.6	81.04	XIC(81.04Â±500ppm)	5552719	390	1153	12.4174 min, 3.151 s	0.134	912
1,3-Benzodioxole	1.03	121.03	XIC(121.03Â±500ppm)	6535056	455	1720	12.5841 min, 3.343 s	0.14	872
Pyridine, 3-methoxy-	2.38	109.05	XIC(109.05Â±500ppm)	12077578	1363	1298	12.5841 min, 3.613 s	0.166	881
2-Furanone, 2,5-dihydro-3,5-dimethyl	1.24	69.04	XIC(69.04Â±500ppm)	41177329	1821	2980	12.5841 min, 3.934 s	0.172	854
Pyrazine, 2-ethyl-3-methyl-	1.92	122.08	XIC(122.08Â±500ppm)	1626369	420	546	12.7507 min, 3.036 s	0.162	847
1H-Pyrrole-2-carboxaldehyde, 1-methyl-	0.65	109.05	XIC(109.05Â±500ppm)	3707542	299	715	12.7507 min, 3.810 s	0.152	873
Pyrazine, 2-(n-propyl)-	1.06	94.05	XIC(94.05Â±500ppm)	1985966	102	207	12.8341 min, 3.040 s	0.125	811
3-Pyridinecarbonitrile	1.66	104.04	XIC(104.04Â±500ppm)	6178237	1095	1292	12.8341 min, 4.177 s	0.162	947
1-Propanone, 1-(2-furanyl)-	1.37	95.01	XIC(95.01Â±500ppm)	9605812	1445	1742	12.9174 min, 3.363 s	0.147	881
Propanoic acid, 2-methyl-, anhydride	1.3	71.06	XIC(71.06Â±500ppm)	82474549	5852	5577	12.9174 min, 3.458 s	0.173	815
1H-Pyrrole-2-carboxaldehyde	1.23	95.04	XIC(95.04Â±500ppm)	8386013	1070	1238	12.9174 min, 3.920 s	0.146	910
Benzene, 1-methoxy-2-methyl-	1.13	122.07	XIC(122.07Â±500ppm)	3409156	390	948	13.0008 min, 2.952 s	0.149	799
3,4,5,6-Tetrahydrophthalic anhydride	1.15	79.06	XIC(79.06Â±500ppm)	3855616	677	481	13.0841 min, 3.830 s	0.161	830
Pyrazine, 2-ethenyl-5-methyl-	1.44	120.07	XIC(120.07Â±500ppm)	2081559	325	618	13.2508 min, 3.267 s	0.181	792
3-Ethenyl-3-methylcyclopentanone	1.06	68.04	XIC(68.04Â±500ppm)	7990252	900	1003	13.2508 min, 3.802 s	0.192	721
6-Heptenoic acid, methyl ester	1.13	74.04	XIC(74.04Â±500ppm)	605141	192	147	13.3341 min, 2.513 s	0.112	873
Benzene, 1-methoxy-4-methyl-	1.1	122.07	XIC(122.07Â±500ppm)	28634347	2218	6229	13.4175 min, 3.028 s	0.135	926
2-Cyclopenten-1-one, 3,4,5-trimethyl-	1.19	81.08	XIC(81.08Â±500ppm)	2835248	707	566	13.6675 min, 3.056 s	0.151	832
1,2-Cyclopentanedione, 3-methyl-	1.13	112.05	XIC(112.05Â±500ppm)	43772599	2235	4474	13.6675 min, 3.581 s	0.144	914
1,4-Cyclohex-2-enedione	1.12	54.04	XIC(54.04Â±500ppm)	8377986	2283	1509	13.8342 min, 4.048 s	0.152	859
Benzene, 1-ethyl-4-methoxy-	0.47	121.03	XIC(121.03Â±500ppm)	2547341	339	1062	13.9175 min, 3.188 s	0.135	715
3,4-dimethylfuran	1.25	96.06	XIC(96.06Â±500ppm)	3838355	467	774	14.0008 min, 3.094 s	0.152	704
Carbamic acid, monoammonium salt	1.68	44	XIC(44.00Â±500ppm)	5084126	160	107	14.0008 min, 3.667 s	0.051	832
Bicyclo[3.2.0]hept-3-en-2-one	1.04	79.06	XIC(79.06Â±500ppm)	11587395	750	1034	14.0008 min, 3.675 s	0.153	821
Hydroquinone	1.39	110.04	XIC(110.04Â±500ppm)	2155622	524	518	14.0842 min, 4.256 s	0.17	783
Carbamic acid, phenyl-, phenyl ester	1.35	94.04	XIC(94.04Â±500ppm)	634815	144	115	14.2509 min, 2.584 s	0.103	741
(2-Aziridinylethyl)amine	2.61	44	XIC(44.00Â±500ppm)	5300986	172	122	14.2509 min, 3.667 s	0.055	908
2(5H)-Furanone, 5-ethyl-	1.15	83.04	XIC(83.04Â±500ppm)	9571282	329	1489	14.2509 min, 4.256 s	0.169	832
3-Methylphenylacetylene	1.08	115.05	XIC(115.05Â±500ppm)	56397884	3084	9817	14.4175 min, 3.302 s	0.143	932
Benzaldehyde, 2-hydroxy-	1.13	122.04	XIC(122.04Â±500ppm)	11602511	1841	2274	14.4175 min, 3.655 s	0.147	889
Benzene, 3-butenyl-	1.18	91.06	XIC(91.06Â±500ppm)	1428321	264	216	14.5009 min, 2.698 s	0.122	790
2,5-Furandicarboxaldehyde	1.31	123.05	XIC(123.05Â±500ppm)	2675677	303	873	14.5009 min, 3.494 s	0.145	732
Pyrrolidine, 1-methyl-	1.22	84.05	XIC(84.05Â±500ppm)	5437153	565	1081	14.5009 min, 3.898 s	0.166	716
4,4-Dimethylcyclohexadienone	2.61	79.06	XIC(79.06Â±500ppm)	2009523	306	331	14.5842 min, 3.199 s	0.143	784
1-Methylcyclooctene	3.85	96.06	XIC(96.06Â±500ppm)	1849705	287	344	14.8342 min, 3.161 s	0.156	747
Cyclohexanone, 3-ethenyl-	0.77	124.05	XIC(124.05Â±500ppm)	1293282	401	673	14.8342 min, 3.522 s	0.164	716
3-Hexanone, 2,5-dimethyl-4-nitro-	2.6	43.05	XIC(43.05Â±500ppm)	2529140	165	187	14.9176 min, 3.234 s	0.14	747
2H-Pyran-2-one, tetrahydro-	1.23	42.03	XIC(42.03Â±500ppm)	25641387	1595	596	14.9176 min, 5.227 s	0.21	884
2-Methyl-6-(p-tolyl)hept-2-en-4-ol	1.05	119.09	XIC(119.09Â±500ppm)	1059048	334	431	15.0009 min, 2.613 s	0.112	711
2-Cyclopenten-1-one, 3-ethyl-2-hydroxy-	1.82	43.06	XIC(43.06Â±500ppm)	3767663	250	234	15.0009 min, 3.249 s	0.158	723
2-Cyclohexen-1-one, 3-methyl-	1.28	82.05	XIC(82.05Â±500ppm)	3718778	516	624	15.0009 min, 3.874 s	0.165	808
5-Ethyl-2-furaldehyde	0.3	109.03	XIC(109.03Â±500ppm)	929983	190	310	15.1676 min, 3.564 s	0.125	829
cis-Carveol, O-(pentafluoropropionyl)-	1.21	93.07	XIC(93.07Â±500ppm)	631137	179	171	15.2509 min, 2.376 s	0.11	727
Ethanone, 1-(1H-pyrrol-2-yl)-	1.26	94.03	XIC(94.03Â±500ppm)	2695078	688	396	15.2509 min, 3.952 s	0.153	845
Acetic acid, phenyl ester	1.08	94.04	XIC(94.04Â±500ppm)	4590780	630	750	15.3343 min, 3.425 s	0.138	817
2-Cyclopenten-1-one, 2,3,4-trimethyl-	1.32	109.07	XIC(109.07Â±500ppm)	8254539	1282	1838	15.4176 min, 3.251 s	0.159	841
1,2,4-Triazolo[4,3-b]pyridazine	1.08	120.06	XIC(120.06Â±500ppm)	21150933	584	3686	15.501 min, 3.739 s	0.22	823
Ethanone, 2,2-dihydroxy-1-phenyl-	1.23	105.03	XIC(105.03Â±500ppm)	38808952	1452	5501	15.501 min, 3.779 s	0.148	881
2-Pyridinecarbonitrile	1.34	104.04	XIC(104.04Â±500ppm)	6215024	1299	885	15.501 min, 4.595 s	0.169	962
Benzaldehyde, 2-methyl-	1.31	91.06	XIC(91.06Â±500ppm)	36183662	1866	3025	15.5843 min, 3.617 s	0.142	912
Benzonitrile, 2-methyl-	1.36	117.06	XIC(117.06Â±500ppm)	17288241	1362	2839	15.5843 min, 3.755 s	0.159	797
2,3-Dimethyl-4-hydroxy-2-butenoic lactone	1.18	55.07	XIC(55.07Â±500ppm)	6753372	1093	581	15.8343 min, 4.352 s	0.165	776
(1R,2R,3S,5R)-(-)-2,3-Pinanediol	2.78	43.04	XIC(43.04Â±500ppm)	3019278	105	152	15.9177 min, 3.402 s	0.177	712
2-Cyclopenten-1-one, 3-ethyl-	1.41	81.04	XIC(81.04Â±500ppm)	14879764	1592	1783	15.9177 min, 3.845 s	0.152	842
Dihydro-3-methylene-5-methyl-2-furanone	1.2	68.04	XIC(68.04Â±500ppm)	15187624	2408	1736	15.9177 min, 4.770 s	0.181	887
Phenol, 3-methyl-	1.22	108.05	XIC(108.05Â±500ppm)	214277958	5274	7193	16.0843 min, 3.224 s	0.141	937
Benzofuran, 2,3-dihydro-	1.02	120.06	XIC(120.06Â±500ppm)	18495801	658	3217	16.0843 min, 3.761 s	0.142	818
Heptanoic acid	1.2	60.03	XIC(60.03Â±500ppm)	1695051	351	266	16.1677 min, 2.340 s	0.094	887
2-Undecanethiol, 2-methyl-	1.76	69.08	XIC(69.08Â±500ppm)	357486	104	64	16.251 min, 1.847 s	0.158	814
2-Methylindene	0.97	130.08	XIC(130.08Â±500ppm)	1548486	338	868	16.251 min, 3.119 s	0.142	859
1,2,4-Triazin-3-amine, 5,6-dimethyl-	1.15	124.05	XIC(124.05Â±500ppm)	11152954	785	2716	16.251 min, 4.146 s	0.158	735
1,10-Undecadiene	0.44	41.06	XIC(41.06Â±500ppm)	508924	145	55	16.4177 min, 1.992 s	0.093	886
Benzene, 1-ethenyl-4-ethyl-	1.02	117.07	XIC(117.07Â±500ppm)	10157464	351	2214	16.4177 min, 2.850 s	0.202	841
2-Cyclohexen-1-one, 3,4-dimethyl-	1.37	96.06	XIC(96.06Â±500ppm)	3136362	533	664	16.501 min, 3.413 s	0.157	747
p-(1-Propenyl)-toluene	1.06	117.07	XIC(117.07Â±500ppm)	1568177	640	511	16.5844 min, 2.839 s	0.123	898
Phenol, 2-methoxy-	1.12	109.03	XIC(109.03Â±500ppm)	187777126	3952	6157	16.5844 min, 3.607 s	0.148	907
Cyclopentane, 1-acetyl-1,2-epoxy-	0.53	55.07	XIC(55.07Â±500ppm)	4310694	601	511	16.5844 min, 3.843 s	0.161	743
2,5-Pyrrolidinedione, 1-methyl-	1.39	113.05	XIC(113.05Â±500ppm)	29947728	1921	4454	16.6677 min, 5.404 s	0.202	947
Cyclopropyl carbinol	1.25	44.04	XIC(44.04Â±500ppm)	19108635	538	258	16.7511 min, 5.162 s	0.189	765
Benzoic acid, methyl ester	1.14	105.03	XIC(105.03Â±500ppm)	6939466	3966	1536	16.8344 min, 3.475 s	0.142	904
Benzene, 1-methyl-4-(2-propenyl)-	1.05	117.07	XIC(117.07Â±500ppm)	2884738	531	764	16.9177 min, 2.835 s	0.134	864
4-Hepten-3-one, 4-methyl-	1.27	97.03	XIC(97.03Â±500ppm)	12491054	1794	2279	16.9177 min, 3.884 s	0.155	830
Benzofuran, 7-methyl-	1.05	131.05	XIC(131.05Â±500ppm)	18112179	1244	5758	17.0011 min, 3.313 s	0.136	904
2-Cyclopenten-1-one, 2-hydroxy-3-methyl-	1.34	112.05	XIC(112.05Â±500ppm)	1693185	571	499	17.0844 min, 4.594 s	0.168	714
Benzene, 2-ethenyl-1,3-dimethyl-	0.98	117.07	XIC(117.07Â±500ppm)	1256395	355	410	17.1678 min, 2.878 s	0.126	878
Benzofuran, 2-methyl-	1.12	131.05	XIC(131.05Â±500ppm)	47297538	2840	10885	17.1678 min, 3.322 s	0.14	920
2-Ethyl-3-methylcyclopent-2-en-1-one	2.97	81.08	XIC(81.08Â±500ppm)	4256481	568	803	17.2511 min, 3.455 s	0.163	781
Benzonitrile, 4-methyl-	1.39	117.06	XIC(117.06Â±500ppm)	5253661	1734	1216	17.2511 min, 3.838 s	0.142	932
Naphthalene, decahydro-, cis-	1.17	138.07	XIC(138.07Â±500ppm)	1143973	321	722	17.3344 min, 3.670 s	0.144	743
Phenol, 3,5-dimethyl-	1.16	122.07	XIC(122.07Â±500ppm)	13867431	1087	1727	17.4178 min, 3.397 s	0.142	810
3-Hydroxy-4-methylbenzaldehyde	1.03	135.05	XIC(135.05Â±500ppm)	3476802	711	1109	17.4178 min, 3.429 s	0.128	764
2,5-Cyclohexadiene-1,4-dione, 2,5-dimethyl-	1.01	68.04	XIC(68.04Â±500ppm)	2414591	179	303	17.4178 min, 3.815 s	0.146	783
Benzocyclobuten-1(2H)-one	1.1	90.05	XIC(90.05Â±500ppm)	1552038	455	529	17.4178 min, 4.092 s	0.15	858
Pyrazine, (1-methylethenyl)-	1.62	119.06	XIC(119.06Â±500ppm)	1501386	278	404	17.4178 min, 4.134 s	0.174	765
1H-Imidazole, 1-methyl-4-nitro-	1.44	42.06	XIC(42.06Â±500ppm)	12448465	834	466	17.5011 min, 4.561 s	0.185	711
2,5-Dimethylanisole	1.83	136.09	XIC(136.09Â±500ppm)	7425460	1177	2486	17.5845 min, 2.962 s	0.178	872
Pyrrolidine	1.31	43.04	XIC(43.04Â±500ppm)	9494009	1161	503	17.5845 min, 4.067 s	0.173	731
2,5-Cyclohexadiene-1,4-dione, 2,6-dimethyl-	1.23	68.04	XIC(68.04Â±500ppm)	816326	158	170	17.6678 min, 3.915 s	0.17	733
Benzene, 1,3-diethenyl-	1.04	130.08	XIC(130.08Â±500ppm)	2281826	930	1332	17.7511 min, 3.070 s	0.122	800
2-Cyclohexen-1-one, 3,5-dimethyl-	1.09	82.01	XIC(82.01Â±500ppm)	2022376	347	571	17.8345 min, 3.915 s	0.13	753
3,5-Dimethylanisole	1.08	136.09	XIC(136.09Â±500ppm)	3771369	534	1252	18.0012 min, 3.070 s	0.133	795
5-Oxotetrahydrofuran-2-carboxylic acid	1.09	85.02	XIC(85.02Â±500ppm)	13077602	1065	3214	18.0012 min, 4.809 s	0.155	761
Ethanone, 1-(2-hydroxy-5-methylphenyl)-	1.03	135.05	XIC(135.05Â±500ppm)	1288906	305	384	18.1678 min, 3.198 s	0.134	728
2,4-Dimethylstyrene	1.14	117.07	XIC(117.07Â±500ppm)	4593685	1195	1236	18.2512 min, 2.928 s	0.146	890
Octanoic acid, methyl ester	1.09	74.04	XIC(74.04Â±500ppm)	695380	234	162	18.4179 min, 2.403 s	0.099	790
Benzyl methyl ketone	1.03	43.04	XIC(43.04Â±500ppm)	3701444	266	226	18.4179 min, 3.821 s	0.143	836
Benzene, 1-methyl-2-(2-propenyl)-	1.03	117.07	XIC(117.07Â±500ppm)	2720905	648	862	18.5012 min, 2.911 s	0.112	889
Ethanone, 1-(4-methylphenyl)-	2.33	91.06	XIC(91.06Â±500ppm)	2494352	559	327	18.8346 min, 3.599 s	0.154	840
Benzyl nitrile	1.23	117.06	XIC(117.06Â±500ppm)	14876651	2716	2834	18.9179 min, 4.441 s	0.158	937
Phenol, 2-ethyl-	1.15	107.05	XIC(107.05Â±500ppm)	18237743	2769	2467	19.0012 min, 3.223 s	0.123	904
Pentanedioic acid, dimethyl ester	1.06	59.05	XIC(59.05Â±500ppm)	750276	150	306	19.0012 min, 3.289 s	0.116	824
Piperidine	0.61	84.05	XIC(84.05Â±500ppm)	6338831	342	1163	19.0846 min, 3.847 s	0.136	716
2-Hepten-4-one, 2-methyl-	0.57	55.07	XIC(55.07Â±500ppm)	3394090	243	335	19.0846 min, 4.202 s	0.142	749
2-Methyl-1-octen-3-yne	1.32	79.06	XIC(79.06Â±500ppm)	1321962	448	184	19.1679 min, 4.031 s	0.172	735
Phenol, 2,4,6-trimethyl-	2.61	121.07	XIC(121.07Â±500ppm)	660310	307	270	19.2513 min, 3.184 s	0.125	705
1H-Indene, 3-methyl-	0.97	130.08	XIC(130.08Â±500ppm)	26739989	1844	7203	19.3346 min, 3.315 s	0.126	924
Benzene, 1,2-dimethoxy-	1.44	138.07	XIC(138.07Â±500ppm)	5766354	680	1635	19.4179 min, 3.775 s	0.162	859
1H-Pyrrole-2-carbonitrile	1.11	92.04	XIC(92.04Â±500ppm)	2423870	383	525	19.4179 min, 4.064 s	0.131	911
Phenol, 2,4-dimethyl-	1.15	107.05	XIC(107.05Â±500ppm)	46463214	2441	3463	19.5013 min, 3.250 s	0.122	907
Acetic acid, 2-ethylhexyl ester	1.21	43.04	XIC(43.04Â±500ppm)	2508738	324	128	19.5846 min, 2.303 s	0.116	901
1H-Indene, 1-methyl-	1.15	130.08	XIC(130.08Â±500ppm)	25074464	12053	6927	19.5846 min, 3.352 s	0.176	929
Benzene, 1-ethenyl-4-methoxy-	1.08	134.07	XIC(134.07Â±500ppm)	2801620	733	1341	19.5846 min, 3.408 s	0.119	865
Benzene, (2-methyl-1-butenyl)-	1.14	131.09	XIC(131.09Â±500ppm)	388261	164	146	19.668 min, 2.779 s	0.124	791
3-Ethoxyamphetamine	1.63	44	XIC(44.00Â±500ppm)	4533871	157	109	19.668 min, 3.638 s	0.051	719
4-Hydroxy-2-methylbenzaldehyde	1.06	135.05	XIC(135.05Â±500ppm)	957695	218	274	19.8346 min, 3.697 s	0.125	805
Naphthalene, 1,2-dihydro-	1.13	128.06	XIC(128.06Â±500ppm)	6877977	2707	1693	20.0013 min, 3.543 s	0.141	877
Benzaldehyde, 3-ethyl-	1.19	134.07	XIC(134.07Â±500ppm)	1317298	343	663	20.0013 min, 3.575 s	0.132	780
1-Propanone, 1-phenyl-	1.19	105.03	XIC(105.03Â±500ppm)	3575440	529	741	20.168 min, 3.641 s	0.133	942
Benzene, 1,3-dimethoxy-	1.05	138.07	XIC(138.07Â±500ppm)	1713278	362	995	20.2513 min, 3.682 s	0.133	877
Benzeneacetonitrile, a-methyl-	1.3	116.05	XIC(116.05Â±500ppm)	2870502	566	855	20.2513 min, 4.106 s	0.158	864
Ethanone, 1-(2-methylphenyl)-	1.28	119.05	XIC(119.05Â±500ppm)	6437119	934	1492	20.5014 min, 3.680 s	0.142	871
Karahanaenone	0.93	152.08	XIC(152.08Â±500ppm)	615017	181	265	20.5847 min, 3.471 s	0.133	734
Benzaldehyde, 2,5-dimethyl-	1.09	133.07	XIC(133.07Â±500ppm)	1931827	411	606	20.5847 min, 3.586 s	0.14	892
Naphthalene, 1,2-dihydro-4-methyl-	1.03	129.07	XIC(129.07Â±500ppm)	3364475	592	969	20.7514 min, 3.141 s	0.129	872
2,2-Dimethylindene, 2,3-dihydro-	1.9	131.09	XIC(131.09Â±500ppm)	750513	358	255	20.8347 min, 2.806 s	0.13	886
Phenol, 2,3-dimethyl-	1.15	107.05	XIC(107.05Â±500ppm)	11134621	949	1385	20.8347 min, 3.416 s	0.125	878
Phenol, 4-methoxy-3-methyl-	1.11	123.05	XIC(123.05Â±500ppm)	5846591	498	1654	20.8347 min, 3.451 s	0.13	730
Ethyl-2-benzofuran	1.05	131.05	XIC(131.05Â±500ppm)	5098167	1166	1938	20.9181 min, 3.316 s	0.129	862
1,11-Dodecadiene	0.95	55.07	XIC(55.07Â±500ppm)	1036143	270	165	21.0847 min, 2.026 s	0.084	873
Phenol, 2-ethyl-5-methyl-	1.18	121.07	XIC(121.07Â±500ppm)	4379097	831	1114	21.0847 min, 3.358 s	0.125	810
1,2-Naphthalenedione	1.05	102.05	XIC(102.05Â±500ppm)	2150136	375	555	21.0847 min, 4.277 s	0.154	922
1H-Indene, 2,3-dihydro-1,2-dimethyl-	1.01	131.09	XIC(131.09Â±500ppm)	4957626	657	964	21.1681 min, 2.932 s	0.123	875
2-Methoxy-5-methylphenol	1.07	123.05	XIC(123.05Â±500ppm)	2230936	286	660	21.1681 min, 3.502 s	0.123	830
2-Propenal, 3-(4-methylphenyl)-	1.1	131.05	XIC(131.05Â±500ppm)	993185	276	338	21.2514 min, 3.936 s	0.178	771
Benzo[c]thiophene	1.07	134.02	XIC(134.02Â±500ppm)	6730534	2831	3240	21.2514 min, 4.106 s	0.146	928
Creosol	1.11	123.05	XIC(123.05Â±500ppm)	24094122	1094	3853	21.4181 min, 3.500 s	0.128	904
1-Octanol	1.1	55.06	XIC(55.06Â±500ppm)	2450171	277	287	21.4181 min, 5.437 s	0.175	735
Phenol, 3,4-dimethyl-	1.2	107.05	XIC(107.05Â±500ppm)	12916390	2236	1567	21.5014 min, 3.434 s	0.129	801
Benzene, pentamethyl-	1.1	133.1	XIC(133.10Â±500ppm)	2052676	391	614	21.6681 min, 2.764 s	0.114	808
Thymol	1.09	135.08	XIC(135.08Â±500ppm)	983354	271	293	21.7515 min, 2.991 s	0.112	705
N-Methyl-9-aza-tricyclo[6.2.2.0(2,7)]dodec-2,4,6,11-tetraene-10-one	1.06	128.06	XIC(128.06Â±500ppm)	1092661	319	353	21.7515 min, 3.594 s	0.125	751
2-Propenenitrile, 3-phenyl-, (E)-	1.16	129.06	XIC(129.06Â±500ppm)	1001155	263	424	21.7515 min, 3.917 s	0.129	808
Cyclodecane	0.3	55.07	XIC(55.07Â±500ppm)	2520770	141	254	21.8348 min, 2.166 s	0.092	887
Benzofuran, 4,7-dimethyl-	1.06	146.07	XIC(146.07Â±500ppm)	6096880	1710	3527	21.8348 min, 3.300 s	0.127	842
Benzoic acid, 4-methyl-, methyl ester	1.14	119.05	XIC(119.05Â±500ppm)	2513616	462	752	22.0015 min, 3.444 s	0.122	897
2-Hydroxy-3-propyl-2-cyclopenten-1-one	2.28	55.07	XIC(55.07Â±500ppm)	1141556	119	124	22.0848 min, 3.417 s	0.115	740
Benzene, 1-ethyl-4-(1-methylethyl)-	1.05	133.1	XIC(133.10Â±500ppm)	533714	218	225	22.1682 min, 2.829 s	0.108	818
Phenol, 3-methyl-5-(1-methylethyl)-, methylcarbamate	1.1	135.08	XIC(135.08Â±500ppm)	1252367	274	285	22.1682 min, 3.025 s	0.118	795
2-Propenal, 3-(2-furanyl)-	1.36	122.04	XIC(122.04Â±500ppm)	2277143	950	684	22.3348 min, 5.068 s	0.175	775
Benzaldehyde, 2,4-dimethyl-	1.19	133.07	XIC(133.07Â±500ppm)	1260019	383	537	22.4182 min, 3.788 s	0.134	911
Tricyclo[4.2.1.1(2,5)]deca-3,7-diene-9,10-dione, (1a,2ÃŸ,5ÃŸ,6a)-	1.11	131.05	XIC(131.05Â±500ppm)	14605268	884	2772	22.5849 min, 4.589 s	0.154	871
Cyclohexanone, 3-vinyl-3-methyl-	1.75	67.07	XIC(67.07Â±500ppm)	572432	308	106	22.7515 min, 3.398 s	0.195	768
Benzothiazole	1.96	135.01	XIC(135.01Â±500ppm)	1232714	357	309	22.7515 min, 4.614 s	0.177	792
2H-Inden-2-one, 1,3-dihydro-	1.28	104.07	XIC(104.07Â±500ppm)	1300985	410	318	22.8349 min, 4.278 s	0.151	810
Benzofuran, 2-ethenyl-	2.03	144.06	XIC(144.06Â±500ppm)	2200026	644	1416	22.9182 min, 3.516 s	0.161	788
3,4-Anhydro-d-galactosan	0.47	44.04	XIC(44.04Â±500ppm)	2152319	220	38	22.9182 min, 4.846 s	0.161	814
Cyclododecene	1.07	54.06	XIC(54.06Â±500ppm)	257496	102	76	23.0016 min, 2.099 s	0.075	793
1H-Benzimidazole, 5,6-dimethyl-	1.06	131.05	XIC(131.05Â±500ppm)	1847685	554	685	23.0016 min, 3.419 s	0.125	780
n-Hexylmethylamine	1.5	44	XIC(44.00Â±500ppm)	4189354	197	94	23.0849 min, 3.621 s	0.049	736
Valeric acid, 2-tetrahydrofurylmethyl ester	1.27	71.06	XIC(71.06Â±500ppm)	3946723	1126	962	23.0849 min, 3.996 s	0.156	748
Phenol, 2-(1-methylethyl)-	1.13	121.07	XIC(121.07Â±500ppm)	8998546	1175	1723	23.1682 min, 3.207 s	0.117	871
m-Guaiacol	1.13	124.05	XIC(124.05Â±500ppm)	1344966	438	453	23.1682 min, 3.819 s	0.128	840
2-Coumaranone	1.16	78.06	XIC(78.06Â±500ppm)	3121397	225	154	23.2516 min, 4.642 s	0.185	884
Phenol, 2-ethyl-6-methyl-	1.15	121.07	XIC(121.07Â±500ppm)	2462814	507	684	23.3349 min, 3.193 s	0.113	818
1H-Pyrrole-2,5-dione, 3-ethyl-4-methyl-	0.6	67.07	XIC(67.07Â±500ppm)	1435642	195	204	23.3349 min, 3.804 s	0.128	812
Quinoline	2.28	129.06	XIC(129.05Â±500ppm)	15608330	1398	1322	23.3349 min, 4.426 s	0.171	955
2-Ethyl-1-H-indene	0.97	129.07	XIC(129.07Â±500ppm)	684053	159	165	23.5016 min, 3.362 s	0.12	769
1,4-Benzenedicarboxaldehyde, 2-methyl-	0.98	148.05	XIC(148.05Â±500ppm)	584315	261	423	23.5016 min, 3.726 s	0.117	728
Phenol, 4-ethyl-3-methyl-	1.13	121.07	XIC(121.07Â±500ppm)	18147417	2400	2537	23.5849 min, 3.275 s	0.116	888
2,2'-Bifuran	1.14	134.04	XIC(134.04Â±500ppm)	1834362	750	685	23.5849 min, 3.949 s	0.14	844
Benzenepropanenitrile	1.36	91.06	XIC(91.06Â±500ppm)	19546639	3279	1371	23.5849 min, 4.560 s	0.162	873
3,4-Dimethoxytoluene	1.42	152.09	XIC(152.09Â±500ppm)	8493713	1200	1581	23.6683 min, 3.578 s	0.138	870
Phenol, 3-ethyl-5-methyl-	1.14	121.07	XIC(121.07Â±500ppm)	5956100	789	1089	23.835 min, 3.237 s	0.111	868
Naphthalene, decahydro-	1.47	138.07	XIC(138.07Â±500ppm)	570999	203	315	23.835 min, 3.907 s	0.137	771
1H-Indene, 2,3-dihydro-4,7-dimethyl-	0.99	131.09	XIC(131.09Â±500ppm)	1790750	318	511	23.9183 min, 3.101 s	0.119	825
2-Cyclohexen-1-one, 4-(1-methylethyl)-	1.15	43.04	XIC(43.04Â±500ppm)	2368712	313	147	23.9183 min, 4.804 s	0.205	763
Phenol, 2-ethyl-4,5-dimethyl-	2.02	135.05	XIC(135.05Â±500ppm)	2229538	907	632	24.0016 min, 3.481 s	0.125	763
2(3H)-Benzofuranone, 3-methyl-	1.15	120.06	XIC(120.06Â±500ppm)	1028052	516	396	24.0016 min, 4.201 s	0.146	907
2-Naphthalenamine	1.25	143.04	XIC(143.04Â±500ppm)	689464	179	383	24.335 min, 4.003 s	0.13	733
Isoquinoline	2.17	129.06	XIC(129.06Â±500ppm)	1664355	467	411	24.335 min, 4.433 s	0.171	913
Benzene, hexyl-	1.07	91.06	XIC(91.06Â±500ppm)	2276660	611	423	24.5017 min, 2.583 s	0.092	918
Phenol, 4-propyl-	1.16	107.05	XIC(107.05Â±500ppm)	5600240	1086	1399	24.5017 min, 3.231 s	0.111	909
1H-1,2,4-Triazol-3-amine, 1-methyl-	1.4	43.04	XIC(43.04Â±500ppm)	4294173	543	335	24.5017 min, 3.592 s	0.13	704
Benzofuran, 7-methoxy-	1.04	148.05	XIC(148.05Â±500ppm)	1864802	389	1310	24.585 min, 4.046 s	0.135	832
2-Methyl-5-hydroxybenzofuran	1.08	148.06	XIC(148.06Â±500ppm)	1871014	398	984	24.7517 min, 3.773 s	0.122	762
Benzene, (1,3-dimethylbutyl)-	1.11	105.07	XIC(105.07Â±500ppm)	2054610	458	380	24.835 min, 2.641 s	0.099	862
3,5-Dimethoxytoluene	1.14	152.09	XIC(152.09Â±500ppm)	4309425	1006	1535	24.835 min, 3.518 s	0.129	904
4'-Methylpropiophenone	1.23	119.05	XIC(119.05Â±500ppm)	961005	269	333	25.0017 min, 3.489 s	0.113	839
1-Naphthalenol	1.02	115.06	XIC(115.06Â±500ppm)	2655244	290	556	25.0017 min, 3.969 s	0.13	883
Benzofuran-2-carboxaldehyde	1.27	146.04	XIC(146.04Â±500ppm)	669501	417	400	25.0017 min, 4.443 s	0.154	771
Benzenepropanoic acid, methyl ester	1.67	104.07	XIC(104.07Â±500ppm)	763378	201	217	25.2517 min, 3.503 s	0.117	801
1H-Inden-1-one, 2,3-dihydro-	1.3	104.06	XIC(104.06Â±500ppm)	18293030	1793	2321	25.2517 min, 4.659 s	0.165	901
2(3H)-Furanone, 3-acetyldihydro-3-methyl-	1.18	43.04	XIC(43.04Â±500ppm)	3394459	253	243	25.3351 min, 5.449 s	0.163	762
Benzene, 1,3,5-trimethyl-2-(1,2-propadienyl)-	1.6	143.09	XIC(143.09Â±500ppm)	390290	196	235	25.4184 min, 3.070 s	0.123	752
Phenol, 4-ethyl-2-methoxy-	1.21	137.06	XIC(137.06Â±500ppm)	30037546	2584	4047	25.4184 min, 3.370 s	0.121	862
1H-Indene, 2,3-dihydro-1,1,3-trimethyl-	1.1	145.07	XIC(145.07Â±500ppm)	947773	416	619	25.5018 min, 3.219 s	0.112	793
Benzocycloheptatriene	1.17	141.07	XIC(141.07Â±500ppm)	1410737	334	634	25.5018 min, 3.597 s	0.121	771
1,12-Tridecadiene	0.82	55.07	XIC(55.07Â±500ppm)	621927	139	111	25.6684 min, 2.035 s	0.074	890
Ethanone, 1-[4-(1-methylethenyl)phenyl]-	1.12	145.07	XIC(145.07Â±500ppm)	1000197	381	487	25.6684 min, 3.240 s	0.118	812
1H-Inden-1-one, 2,3-dihydro-3-methyl-	1.15	131.05	XIC(131.05Â±500ppm)	4064380	958	801	25.6684 min, 4.242 s	0.155	830
4-tert-Butoxystyrene	1.12	120.06	XIC(120.06Â±500ppm)	2369754	844	858	25.7518 min, 3.566 s	0.116	774
6-Benzofuranylacetaldehyde	1.1	131.05	XIC(131.05Â±500ppm)	1201941	373	498	25.9185 min, 3.215 s	0.114	791
Phenol, 2,3,5,6-tetramethyl-	1.16	135.08	XIC(135.08Â±500ppm)	1213610	292	351	26.0018 min, 3.300 s	0.119	721
Indole	1.1	117.06	XIC(117.05Â±500ppm)	1346196	554	442	26.0018 min, 4.659 s	0.16	918
3-Undecene, (Z)-	0.34	55.07	XIC(55.07Â±500ppm)	710617	120	134	26.2518 min, 2.156 s	0.08	883
1H-Inden-1-one, 2,3-dihydro-3,3-dimethyl-	1.22	145.07	XIC(145.07Â±500ppm)	12151099	2275	2905	26.7519 min, 3.246 s	0.116	800
2,5-Diethylphenol	1.11	135.08	XIC(135.08Â±500ppm)	1575594	482	532	26.9185 min, 3.175 s	0.112	822
1,2,3-Trimethoxybenzene	1.45	168.08	XIC(168.08Â±500ppm)	812734	283	591	27.0019 min, 3.878 s	0.149	830
3-Penten-2-one, 4-phenyl-	0.89	160.09	XIC(160.09Â±500ppm)	932247	234	879	27.0852 min, 3.291 s	0.117	720
1H-Inden-5-ol, 2,3-dihydro-	2.19	134.07	XIC(134.07Â±500ppm)	891379	249	359	27.0852 min, 3.892 s	0.133	796
3-Methoxy-5-methylphenol	1.19	138.07	XIC(138.07Â±500ppm)	1349870	306	568	27.3352 min, 3.748 s	0.12	890
Ethanone, 1-(2-hydroxy-4-methoxyphenyl)-	1.29	151.08	XIC(151.08Â±500ppm)	1483973	421	687	27.4186 min, 3.446 s	0.128	770
2,5,6-Trimethylbenzimidazole	1.06	160.09	XIC(160.09Â±500ppm)	1842359	566	1595	27.5019 min, 3.285 s	0.119	753
1-Naphthalenol, 4-methyl-	0.71	158.08	XIC(158.08Â±500ppm)	452362	278	383	27.9186 min, 3.517 s	0.155	718
Cyclobuta[de]naphthalene	1.07	140.06	XIC(140.06Â±500ppm)	683261	270	499	28.002 min, 4.032 s	0.131	865
Phenol, 2,6-dimethyl-4-nitro-	2.19	91.06	XIC(91.06Â±500ppm)	438523	187	80	28.252 min, 3.475 s	0.111	736
1(3H)-Isobenzofuranone	1.25	105.04	XIC(105.02Â±500ppm)	2523943	613	605	28.252 min, 5.400 s	0.185	934
7-Methylindan-1-one	1.31	146.07	XIC(146.07Â±500ppm)	2844180	1121	873	28.3353 min, 4.300 s	0.156	844
L-Tyrosine, O-methyl-, ethyl ester	1.69	121.07	XIC(121.07Â±500ppm)	883378	285	295	28.4187 min, 3.184 s	0.127	746
Phenol, 3-methoxy-2,4,5-trimethyl-	2.46	166.1	XIC(166.10Â±500ppm)	1588957	189	996	28.5853 min, 3.261 s	0.123	749
Phenol, 2,6-dimethoxy-	1.12	154.07	XIC(154.07Â±500ppm)	15572548	3079	2708	28.5853 min, 4.208 s	0.141	878
2-Methyl-1-undecanol	0.97	57.09	XIC(57.09Â±500ppm)	1095325	209	195	28.6687 min, 1.865 s	0.081	869
Phenol, 2-methoxy-3-(2-propenyl)-	1.13	164.09	XIC(164.09Â±500ppm)	4376198	1631	2169	28.8354 min, 3.446 s	0.117	904
Benzene, heptyl-	0.99	92.06	XIC(92.06Â±500ppm)	1171810	424	348	29.002 min, 2.555 s	0.084	909
Dibenzo[a,i]biphenylene, 5,6,6a,6b,7,8,12b,12c-octahydro-2,11-dimethoxy-	1.35	145.07	XIC(145.07Â±500ppm)	390147	181	272	29.002 min, 3.478 s	0.117	703
6-Methoxy-3-methylbenzofuran	1.08	162.07	XIC(162.07Â±500ppm)	1825944	388	1081	29.002 min, 3.816 s	0.128	766
Phenol, 3,5-diethyl-	1.09	135.08	XIC(135.08Â±500ppm)	632574	198	212	29.0854 min, 3.323 s	0.111	771
Benzaldehyde, 3-hydroxy-	1.14	121.03	XIC(121.03Â±500ppm)	1510015	265	406	29.0854 min, 4.218 s	0.134	877
Phenol, 2-methoxy-4-propyl-	1.11	137.06	XIC(137.06Â±500ppm)	5568134	2460	2100	29.2521 min, 3.258 s	0.111	892
8,9-Dehydrothymol methyl ether	1.19	162.07	XIC(162.07Â±500ppm)	921523	240	695	29.2521 min, 3.938 s	0.131	721
Naphthalene, 1,2,3,4-tetrahydro-1,4-dimethyl-	2.19	145.07	XIC(145.07Â±500ppm)	516167	140	271	29.4187 min, 3.986 s	0.159	711
Formic acid, 2-propylphenyl ester	0.96	107.05	XIC(107.05Â±500ppm)	1380772	282	412	29.5021 min, 4.404 s	0.134	711
1H-Indene, 1,1,3-trimethyl-	1.27	143.09	XIC(143.09Â±500ppm)	330705	106	168	29.6688 min, 3.287 s	0.119	777
Hydrocoumarin	1.02	120.06	XIC(120.06Â±500ppm)	603371	505	261	29.8354 min, 5.027 s	0.16	834
Indole, 3-methyl-	1.11	130.07	XIC(130.07Â±500ppm)	4139377	510	1257	29.9188 min, 4.506 s	0.14	907
1,15-Pentadecanediol	0.81	55.07	XIC(55.07Â±500ppm)	570695	165	117	30.0021 min, 2.030 s	0.074	901
Naphthalene, 1-ethyl-	1.04	141.07	XIC(141.07Â±500ppm)	8194573	1767	2486	30.1688 min, 3.619 s	0.118	909
1,1'-Biphenyl, 2-methyl-	1.07	168.1	XIC(168.10Â±500ppm)	1184446	716	1260	30.5022 min, 3.560 s	0.122	893
Vanillin	1.14	151.04	XIC(151.04Â±500ppm)	6096550	1987	1928	30.5022 min, 4.569 s	0.15	941
Naphthalene, 1,7-dimethyl-	1.05	156.1	XIC(156.10Â±500ppm)	8550391	1477	4441	30.5855 min, 3.612 s	0.122	929
Acenaphthylene	1.14	152.06	XIC(152.06Â±500ppm)	4781451	1044	1633	30.5855 min, 4.050 s	0.132	912
1H-Inden-1-one, 2,3-dihydro-3,4,7-trimethyl-	1.07	159.08	XIC(159.08Â±500ppm)	2128618	371	785	30.7522 min, 3.132 s	0.112	724
Benzaldehyde, 2-hydroxy-3-(2-propenyl)-	0.8	162.07	XIC(162.07Â±500ppm)	316688	110	247	30.8355 min, 3.639 s	0.113	704
Benzene, 1,2,3-trimethoxy-5-methyl-	1.32	167.07	XIC(167.07Â±500ppm)	1215479	485	601	30.9189 min, 3.637 s	0.133	824
Toluene, 4-(1,1-dimethyl-2-propynyloxy)-	1.67	159.08	XIC(159.08Â±500ppm)	831866	548	477	31.0022 min, 3.155 s	0.108	738
Caryophyllene	0.69	41.06	XIC(41.06Â±500ppm)	701176	175	80	31.4189 min, 2.567 s	0.119	888
1H-Isoindole-1,3(2H)-dione, 2-methyl-	1.41	161.05	XIC(161.05Â±500ppm)	2144161	692	771	31.4189 min, 4.784 s	0.161	926
Phenol, 2-(2-pentyn-4-yl)-4-methyl-	1.44	159.08	XIC(159.08Â±500ppm)	700976	271	348	31.5022 min, 3.182 s	0.107	817
Acetic acid, 3-[1,3]dioxolan-2-ylpropyl ester	1.76	73.05	XIC(73.05Â±500ppm)	544492	148	228	31.5856 min, 6.104 s	0.043	730
Bicyclo[3.1.1]hept-2-ene, 2,6-dimethyl-6-(4-methyl-3-pentenyl)-	1.12	93.07	XIC(93.07Â±500ppm)	795215	230	263	32.169 min, 2.324 s	0.085	879
Naphthalene, 2,6-dimethyl-	1.12	156.1	XIC(156.10Â±500ppm)	2642099	443	1377	32.169 min, 3.875 s	0.125	906
Naphthalene, 1,2,3,4-tetrahydro-6,7-dimethyl-	0.55	145.07	XIC(145.07Â±500ppm)	524843	129	262	32.2523 min, 4.224 s	0.134	707
Cyclohexane, octyl-	1.13	83.09	XIC(83.09Â±500ppm)	319830	139	158	32.5023 min, 2.121 s	0.07	854
3,5-Dimethoxy-4-hydroxytoluene	1.09	168.08	XIC(168.08Â±500ppm)	3016546	841	1371	32.5857 min, 3.932 s	0.129	710
Naphthalene, 2-(1-methylethyl)-	1.14	155.09	XIC(155.09Â±500ppm)	367187	171	246	32.7523 min, 3.438 s	0.105	832
Humulene	0.94	93.07	XIC(93.07Â±500ppm)	775136	199	229	32.8357 min, 2.655 s	0.117	725
5,9-Undecadien-2-one, 6,10-dimethyl-, (Z)-	1.1	43.04	XIC(43.04Â±500ppm)	2389836	329	228	32.8357 min, 2.688 s	0.092	859
Dimethyl phthalate	1.2	163.04	XIC(163.04Â±500ppm)	2645064	814	1067	32.919 min, 4.245 s	0.152	822
Benzene, octyl-	1.08	92.06	XIC(92.06Â±500ppm)	982082	357	323	33.3357 min, 2.513 s	0.084	896
Piperidine, 2-(tetrahydro-2-furanyl)-	1.22	84.05	XIC(84.05Â±500ppm)	2800287	1365	1043	33.5024 min, 2.642 s	0.087	780
1H-Inden-1-one, 2,3-dihydro-4,7-dimethyl-	1.2	160.09	XIC(160.09Â±500ppm)	448389	126	324	33.7524 min, 4.175 s	0.132	776
Acenaphthene	1.06	153.07	XIC(153.07Â±500ppm)	3459227	805	1237	33.8358 min, 4.243 s	0.137	942
Benzonitrile, 2,4,6-trimethyl-	0.93	130.07	XIC(130.07Â±500ppm)	658467	244	310	33.9191 min, 4.334 s	0.13	714
Naphthalene, 1-propyl-	1.03	141.07	XIC(141.07Â±500ppm)	438162	221	234	34.0858 min, 3.473 s	0.105	707
Apocynin	1.1	151.04	XIC(151.04Â±500ppm)	2316002	519	849	34.0858 min, 4.418 s	0.136	838
Naphthalene, decahydro-4a-methyl-1-methylene-7-(1-methylethenyl)-, [4aR-(4aa,7a,8aÃŸ)]-	0.94	41.06	XIC(41.06Â±500ppm)	555536	444	68	34.1691 min, 2.680 s	0.1	927
1-Naphthalenecarbonitrile	1.66	153.06	XIC(153.06Â±500ppm)	8934949	2115	1499	34.2525 min, 4.774 s	0.165	922
1,1'-Biphenyl, 4-methyl-	1.06	168.1	XIC(168.10Â±500ppm)	2166055	596	1222	34.3358 min, 3.706 s	0.118	892
Naphthalene, decahydro-4a-methyl-1-methylene-7-(1-methylethylidene)-, (4aR-trans)-	1.04	93.07	XIC(93.07Â±500ppm)	522160	147	171	34.5025 min, 2.653 s	0.093	812
1-Naphthalenecarboxaldehyde	1.25	128.07	XIC(128.07Â±500ppm)	1509287	432	298	34.5858 min, 4.855 s	0.156	929
Naphthalene, 1,4,5-trimethyl-	1.11	155.09	XIC(155.09Â±500ppm)	1467104	689	907	34.6692 min, 3.479 s	0.116	871
1-Isopropenylnaphthalene	1.08	153.07	XIC(153.07Â±500ppm)	1040620	256	385	34.9192 min, 3.953 s	0.119	768
ÃŸ-Bisabolene	1	41.06	XIC(41.06Â±500ppm)	544353	213	69	35.0859 min, 2.413 s	0.083	856
1,1,4,5,6-Pentamethyl-2,3-dihydro-1H-indene	1.1	173.13	XIC(173.13Â±500ppm)	292897	127	235	35.4192 min, 3.196 s	0.111	786
Naphthalene, 1,6,7-trimethyl-	1.48	170.11	XIC(170.11Â±500ppm)	690143	282	653	35.5026 min, 3.562 s	0.115	868
Naphthalene, 2,3,6-trimethyl-	1.14	170.11	XIC(170.11Â±500ppm)	2308494	573	1217	35.6692 min, 3.565 s	0.12	873
Homovanillyl alcohol	1.08	137.06	XIC(137.06Â±500ppm)	2955406	830	1447	35.9193 min, 4.291 s	0.136	715
1(2H)-Acenaphthylenone	1.01	168.06	XIC(168.06Â±500ppm)	2177235	316	1196	36.1693 min, 4.425 s	0.133	853
4-Nitroguaiacol	1.27	169.04	XIC(169.03Â±500ppm)	1592370	450	665	36.336 min, 4.579 s	0.149	891
Cyclohexane, propyl-	0.83	83.09	XIC(83.09Â±500ppm)	368469	122	168	36.6693 min, 2.113 s	0.072	767
1H-Phenalene	1.09	165.07	XIC(165.07Â±500ppm)	2621110	624	1406	36.9193 min, 4.221 s	0.131	892
Pentadecane, 2-methyl-	1.96	57.09	XIC(57.09Â±500ppm)	393051	129	129	37.2527 min, 1.845 s	0.062	887
Benzene, nonyl-	1.07	92.06	XIC(92.06Â±500ppm)	785385	350	308	37.4194 min, 2.484 s	0.076	897
Fluorene	1.1	165.07	XIC(165.07Â±500ppm)	1435196	455	938	37.4194 min, 4.308 s	0.131	918
(S)-5-Hydroxymethyl-2[5H]-furanone	1.09	84.05	XIC(84.05Â±500ppm)	1023222	607	488	37.5027 min, 2.597 s	0.082	747
Caryophyllene oxide	1.14	41.06	XIC(41.06Â±500ppm)	823749	216	89	37.9194 min, 3.067 s	0.117	893
4,4'-Dimethylbiphenyl	0.98	182.11	XIC(182.11Â±500ppm)	347209	203	351	38.0861 min, 3.529 s	0.107	842
Fluorene, 2,4a-dihydro-	1.01	153.07	XIC(153.07Â±500ppm)	322775	177	200	38.1694 min, 4.081 s	0.12	764
4,5-Dimethoxy-2-nitrotoluene	1.11	77.05	XIC(77.05Â±500ppm)	1736720	682	303	38.5028 min, 3.688 s	0.116	703
9H-Fluorene, 9-methyl-	1.1	165.07	XIC(165.07Â±500ppm)	1432870	471	906	38.5028 min, 4.016 s	0.129	888
Phenol, 2,6-dimethoxy-4-(2-propenyl)-	1.08	194.1	XIC(194.10Â±500ppm)	564344	303	509	38.7528 min, 3.765 s	0.118	843
(1R,3E,7E,11R)-1,5,5,8-Tetramethyl-12-oxabicyclo[9.1.0]dodeca-3,7-diene	2.23	43.04	XIC(43.04Â±500ppm)	296802	287	33	38.9195 min, 3.130 s	0.136	825
4-Hydroxy-3-methoxy-ÃŸ-nitrostyrene	1.02	77.05	XIC(77.05Â±500ppm)	2009015	739	257	38.9195 min, 3.899 s	0.123	729
6H-Dibenzo[b,d]-pyran	0.96	182.08	XIC(182.08Â±500ppm)	2773793	621	1952	39.1695 min, 3.948 s	0.123	868
1-butyne, 4-chloro-3-methyl-3-phenyl-	0.94	128.07	XIC(128.07Â±500ppm)	491601	179	198	40.0029 min, 4.675 s	0.138	733
[1,1'-Biphenyl]-4-carboxaldehyde	1.06	182.08	XIC(182.08Â±500ppm)	435519	249	399	40.3363 min, 4.137 s	0.139	839
Benzaldehyde, 4-hydroxy-3,5-dimethoxy-	1.04	182.06	XIC(182.06Â±500ppm)	400247	133	284	40.8363 min, 4.760 s	0.127	856
Hexadecane, 3-methyl-	0.85	57.09	XIC(57.09Â±500ppm)	309534	131	111	41.253 min, 1.865 s	0.06	913
Benzene, decyl-	1.11	92.06	XIC(92.06Â±500ppm)	415893	165	138	41.253 min, 2.463 s	0.072	775
9H-Fluorene, 4-methyl-	1.06	165.07	XIC(165.07Â±500ppm)	1988040	257	777	41.9197 min, 4.068 s	0.161	897
13-Methyltetradecanal	1.04	43.07	XIC(43.07Â±500ppm)	642362	178	72	42.7531 min, 2.333 s	0.071	918
Methyl tetradecanoate	1.2	74.04	XIC(74.04Â±500ppm)	218100	111	87	43.1698 min, 2.261 s	0.073	760
3-Methoxyphenol, TMS derivative	1.07	181.07	XIC(181.07Â±500ppm)	380390	233	274	43.2532 min, 3.777 s	0.108	755
9H-Fluoren-9-one	1.3	180.06	XIC(180.05Â±500ppm)	1559411	293	845	43.2532 min, 4.863 s	0.158	933
1-Dodecanol, 3,7,11-trimethyl-	1.05	56.08	XIC(56.08Â±500ppm)	4429865	1085	904	43.4199 min, 1.865 s	0.062	859
Naphtho[2,1-b]furan, 1,2-dimethyl-	1.03	196.09	XIC(196.09Â±500ppm)	520084	215	482	43.4199 min, 3.802 s	0.111	801
Phenol, 4-(2-phenylethenyl)-, (E)-	1.53	196.1	XIC(196.10Â±500ppm)	438037	211	366	43.9199 min, 3.800 s	0.143	722
2,5-Dimethoxy-ÃŸ-nitrostyrene	1.06	91.06	XIC(91.06Â±500ppm)	892172	147	139	44.1699 min, 3.755 s	0.112	731
Phenanthrene	1.15	178.08	XIC(178.08Â±500ppm)	26692253	1730	5780	44.67 min, 4.774 s	0.146	939
Benzene, undecyl-	1.08	92.06	XIC(92.06Â±500ppm)	331066	139	126	45.0033 min, 2.428 s	0.075	869
Anthracene	1.05	178.08	XIC(178.08Â±500ppm)	2140952	325	956	45.0033 min, 4.727 s	0.149	940
2-Methylthio-5-nitro anisole	1.07	199.05	XIC(199.05Â±500ppm)	5701528	939	3104	45.5034 min, 4.721 s	0.143	709
Hexadecane, 2,6,10,14-tetramethyl-	1.58	57.09	XIC(57.09Â±500ppm)	1170912	647	303	46.0867 min, 1.808 s	0.067	924
Neophytadiene	1.07	68.07	XIC(68.07Â±500ppm)	379839	194	178	47.0868 min, 1.957 s	0.062	884
2-Pentadecanone, 6,10,14-trimethyl-	1.15	43.05	XIC(43.05Â±500ppm)	991593	237	107	47.2535 min, 2.195 s	0.067	894
Anthracene, 9-ethenyl-	1.17	204.1	XIC(204.10Â±500ppm)	339956	144	380	47.5035 min, 4.434 s	0.129	922
Anthracene, 2-methyl-	1.16	192.1	XIC(192.10Â±500ppm)	473802	463	440	48.5869 min, 4.467 s	0.135	901
3-Eicosene, (E)-	0.96	43.07	XIC(43.07Â±500ppm)	292754	149	56	48.9203 min, 1.928 s	0.056	926
4H-Cyclopenta[def]phenanthrene	1.07	190.08	XIC(190.08Â±500ppm)	553216	209	545	49.2537 min, 4.857 s	0.141	913
1,2-Benzenedicarboxylic acid, butyl 2-ethylhexyl ester	1.11	149.03	XIC(149.03Â±500ppm)	18818464	4152	5341	49.587 min, 3.284 s	0.109	907
Phthalic acid, 8-bromoctyl isobutyl ester	1.31	149.03	XIC(149.03Â±500ppm)	403261	189	303	49.837 min, 3.168 s	0.108	749
1,2-Benzenedicarboxylic acid, butyl octyl ester	1.13	149.03	XIC(149.03Â±500ppm)	5223427	1657	2774	50.2537 min, 3.140 s	0.107	811
Dibutyl phthalate	1.1	149.03	XIC(149.03Â±500ppm)	13461864	2979	4037	51.0871 min, 3.334 s	0.108	928
5-Eicosene, (E)-	1.19	55.07	XIC(55.07Â±500ppm)	274067	113	78	52.0872 min, 1.926 s	0.057	940
Phthalic acid, di(2-methylbutyl) ester	1.12	149.03	XIC(149.03Â±500ppm)	646510	463	758	52.4206 min, 3.054 s	0.104	800
Diamyl phthalate	1.03	149.03	XIC(149.03Â±500ppm)	769619	347	631	52.5873 min, 3.207 s	0.098	849
Fluoranthene	1.22	202.08	XIC(202.08Â±500ppm)	991536	129	665	53.6707 min, 5.052 s	0.156	921

## Sheet: Plywood (SPE5)
Name	Tailing.Factor	Base.Mass	Quant.Masses	Area	Peak.S.N	Quant.S.N	R.T...min.	FWHH..s.	Similarity
1,3-Dioxolane, 2-ethyl-	1.19	45.05	XIC(45.05Â±500ppm)	14974133	368	274	3.5 min, 6.450 s	0.128	771
Pyrazine	1.38	80.04	XIC(80.04Â±500ppm)	24966844	2978	3904	3.75002 min, 2.127 s	0.114	964
Propane, 1-(1-methylethoxy)-	0.76	43.07	XIC(43.07Â±500ppm)	41686279	606	1139	3.9167 min, 1.510 s	0.099	703
3-Penten-2-one, (E)-	1.29	69.04	XIC(69.04Â±500ppm)	11673565	1875	2050	3.9167 min, 1.958 s	0.1	870
2-Butanol, 3-methyl-	0.46	45.05	XIC(45.05Â±500ppm)	15274291	437	482	4.00004 min, 1.524 s	0.098	795
1,3-Cyclopentadiene, 5,5-dimethyl-	1.1	79.06	XIC(79.06Â±500ppm)	1057987	217	170	4.08338 min, 1.683 s	0.107	740
Furan, 2-methyl-	1.34	82.04	XIC(82.04Â±500ppm)	1184604	491	433	4.08338 min, 2.091 s	0.096	740
Pyridine	2.43	79.04	XIC(79.04Â±500ppm)	51644383	3244	2691	4.08338 min, 2.120 s	0.134	864
Carbamic acid, methyl ester	0.56	44.03	XIC(44.03Â±500ppm)	5985111	122	75	4.08338 min, 2.169 s	0.101	813
2-Butenoic acid, methyl ester	1.26	69.04	XIC(69.04Â±500ppm)	1859366	500	521	4.3334 min, 1.943 s	0.101	716
Oxazolidine, 3-methyl-2-propyl-	1.17	86.04	XIC(86.04Â±500ppm)	16239908	2396	3950	4.3334 min, 2.412 s	0.119	833
1-Hydroxy-2-butanone	1.4	57.05	XIC(57.05Â±500ppm)	55539821	3108	3969	4.41674 min, 2.188 s	0.108	903
4-Hexen-3-one	0.75	41.06	XIC(41.06Â±500ppm)	1293679	228	82	4.50008 min, 1.900 s	0.105	759
Butanoic acid	1.26	60.04	XIC(60.04Â±500ppm)	26671690	1853	2232	4.7501 min, 1.783 s	0.092	925
2-Furanol, tetrahydro-	1.27	42.06	XIC(42.06Â±500ppm)	28728140	1053	436	4.7501 min, 2.145 s	0.119	812
Cyclopentanone	1.23	55.04	XIC(55.04Â±500ppm)	36032170	4187	3552	4.91678 min, 2.439 s	0.135	888
Cyclohexane, 1,2-dimethyl-, trans-	1.39	55.07	XIC(55.07Â±500ppm)	3013624	751	445	5.08346 min, 1.638 s	0.158	851
2-Butene-1,4-diol, (Z)-	1.48	42.06	XIC(42.06Â±500ppm)	1325099	137	42	5.08346 min, 2.120 s	0.119	776
Carbonocyanidic acid, ethyl ester	1.35	84.02	XIC(84.02Â±500ppm)	12391304	3710	2829	5.1668 min, 2.824 s	0.137	763
Pyridine, 2-methyl-	3.2	93.06	XIC(93.06Â±500ppm)	12547098	1568	1512	5.83352 min, 2.360 s	0.152	871
Pyrazine, methyl-	1.5	94.05	XIC(94.05Â±500ppm)	24489080	2439	2969	5.83352 min, 2.535 s	0.14	926
Butanoic acid, 2-hydroxy-, methyl ester	1.28	59.06	XIC(59.06Â±500ppm)	4287251	1204	1091	6.08354 min, 2.189 s	0.135	764
2-Cyclopenten-1-one	1.38	82.04	XIC(82.04Â±500ppm)	113538345	4858	8292	6.08354 min, 3.024 s	0.159	825
Cyclopentanone, 3-methyl-	0.98	69.04	XIC(69.04Â±500ppm)	2221936	283	511	6.50024 min, 2.593 s	0.143	857
2-Furanmethanol	1.2	98.03	XIC(98.03Â±500ppm)	48623844	2974	5911	6.8336 min, 2.661 s	0.132	879
Pyridine, 3-methyl-	2.75	93.06	XIC(93.06Â±500ppm)	9502585	724	1093	7.16696 min, 2.692 s	0.159	941
1,4-Hexadiene, 2-methyl-	1.22	81.04	XIC(81.04Â±500ppm)	6751269	880	999	7.2503 min, 2.926 s	0.165	817
2-Propanone, 1-(acetyloxy)-	1.16	43.03	XIC(43.03Â±500ppm)	92681456	2400	2769	7.33364 min, 2.954 s	0.157	976
N-Vinylimidazole	2.04	94.05	XIC(94.05Â±500ppm)	18559433	1441	2461	7.50032 min, 2.914 s	0.153	794
4-Cyclopentene-1,3-dione	1.14	96.02	XIC(96.02Â±500ppm)	10931118	2298	2405	7.83368 min, 3.426 s	0.148	903
2,6-Lutidine	1.63	107.07	XIC(107.07Â±500ppm)	2626112	829	830	8.0837 min, 2.541 s	0.172	749
Ethanone, 1-(2-furanyl)-	1.29	95.01	XIC(95.01Â±500ppm)	62940097	6970	6047	8.75042 min, 3.181 s	0.156	903
Butanoic acid, 4-hydroxy-	1.26	42.06	XIC(42.06Â±500ppm)	120547948	4327	2455	8.83376 min, 4.485 s	0.202	917
2(5H)-Furanone	1.18	55.03	XIC(55.02Â±500ppm)	108904614	11608	6390	8.9171 min, 4.578 s	0.186	928
1H-Pyrazole, 1-methyl-3-vinyl-	1.46	108.06	XIC(108.06Â±500ppm)	7164391	1520	1430	9.00044 min, 2.849 s	0.148	769
2-Cyclohexen-1-one	1.21	68.04	XIC(68.04Â±500ppm)	6489559	1428	1210	9.58382 min, 3.544 s	0.174	830
1,4-Dimethyl-pyridinium chloride	2.55	107.07	XIC(107.07Â±500ppm)	3430435	718	704	9.83384 min, 2.781 s	0.163	859
N-Methylmaleimide	1.16	54.03	XIC(54.03Â±500ppm)	2050837	545	480	9.83384 min, 3.889 s	0.169	905
2-Cyclopenten-1-one, 3,4-dimethyl-	1.18	67.07	XIC(67.07Â±500ppm)	7347390	517	894	9.91718 min, 2.950 s	0.147	835
2(5H)-Furanone, 5-methyl-	1.19	55.04	XIC(55.04Â±500ppm)	7290370	1788	1170	10.0005 min, 4.119 s	0.177	861
Pyridine, 2,3-dimethyl-	2.44	107.07	XIC(107.07Â±500ppm)	1755013	274	475	10.3339 min, 2.911 s	0.173	837
Oxime-, methoxy-phenyl-_	0.23	133.02	XIC(133.02Â±500ppm)	363406	154	200	10.5839 min, 1.742 s	0.123	708
3,4,5,6-Tetrahydrophthalic anhydride	1.26	79.06	XIC(79.06Â±500ppm)	3012288	668	459	10.5839 min, 3.109 s	0.152	805
2,3-Pentanedione	1.09	57.05	XIC(57.05Â±500ppm)	7608300	4212	1904	11.0006 min, 3.222 s	0.151	830
2,4-Dihydroxybenzaldehyde, 2TMS derivative	6.17	44	XIC(44.00Â±500ppm)	1791034	425	48	11.1673 min, 1.520 s	0.173	702
2-Butanone, 1-(acetyloxy)-	1.21	43.04	XIC(43.04Â±500ppm)	11745495	900	385	11.1673 min, 3.223 s	0.161	828
Methyl 2-furoate	1.16	95.01	XIC(95.01Â±500ppm)	20578362	2844	5380	11.5006 min, 3.392 s	0.149	944
4(3H)-Pyrimidinone, 3-methyl-	1.14	110.04	XIC(110.04Â±500ppm)	8472330	1732	2392	11.584 min, 4.186 s	0.165	720
4-Methyl-5H-furan-2-one	1.12	41.06	XIC(41.06Â±500ppm)	13907810	1191	709	11.584 min, 4.404 s	0.182	837
Pentanoic acid, 4-oxo-, methyl ester	1.09	43.04	XIC(43.04Â±500ppm)	2213572	168	126	12.084 min, 3.488 s	0.145	871
Benzofuran	1.09	118.04	XIC(118.04Â±500ppm)	4612414	985	2496	12.334 min, 3.209 s	0.141	935
Pyridine, 3-methoxy-	3.21	109.05	XIC(109.05Â±500ppm)	2271332	509	764	12.6674 min, 3.587 s	0.175	861
2-Furanone, 2,5-dihydro-3,5-dimethyl	1.27	69.04	XIC(69.04Â±500ppm)	12440112	1382	1472	12.6674 min, 3.899 s	0.17	856
1H-Pyrrole-2-carboxaldehyde, 1-methyl-	0.59	109.05	XIC(109.05Â±500ppm)	2398259	224	610	12.7507 min, 3.812 s	0.148	874
2,4-Dimethyl-2-oxazoline-4-methanol	3.33	42.05	XIC(42.05Â±500ppm)	2349130	548	117	12.8341 min, 3.180 s	0.173	831
Propanoic acid, 2-methyl-, anhydride	1.34	71.06	XIC(71.06Â±500ppm)	52641630	4081	4910	12.9174 min, 3.452 s	0.167	819
Benzene, 1-methoxy-4-methyl-	1.19	122.07	XIC(122.07Â±500ppm)	1305961	571	766	13.0008 min, 2.952 s	0.146	849
Benzene, 1,3-dichloro-	1.11	145.97	XIC(145.97Â±500ppm)	3206242	829	3654	13.0008 min, 3.021 s	0.121	934
3-Ethenyl-3-methylcyclopentanone	1.09	68.04	XIC(68.04Â±500ppm)	2419473	340	394	13.2508 min, 3.804 s	0.147	756
Heptane, 5-ethyl-2-methyl-	0.64	43.07	XIC(43.07Â±500ppm)	487847	127	55	13.5841 min, 1.745 s	0.093	894
2-Cyclopenten-1-one, 3,4,5-trimethyl-	1.18	81.08	XIC(81.08Â±500ppm)	882110	480	267	13.6675 min, 3.058 s	0.15	784
1,2-Cyclopentanedione, 3-methyl-	1.16	112.05	XIC(112.05Â±500ppm)	16061305	1609	3054	13.6675 min, 3.578 s	0.14	898
Limonene	1.15	68.07	XIC(68.07Â±500ppm)	1089018	260	224	13.8342 min, 2.267 s	0.113	862
1,4-Cyclohex-2-enedione	1.11	54.04	XIC(54.04Â±500ppm)	2530518	1085	587	13.8342 min, 4.045 s	0.149	874
4(3H)-Pyrimidinone, 6-amino-2-methyl-	1.13	125.05	XIC(125.05Â±500ppm)	2344575	219	1311	13.9175 min, 3.915 s	0.189	702
1-Methylcyclooctene	1.21	96.06	XIC(96.06Â±500ppm)	1346596	355	377	14.0008 min, 3.088 s	0.151	770
1,3-trans,5-cis-Octatriene	1.16	79.06	XIC(79.06Â±500ppm)	3773274	735	466	14.0842 min, 3.620 s	0.185	751
1H-Indene, 1-chloro-2,3-dihydro-	1.08	115.06	XIC(115.06Â±500ppm)	11988530	1290	2936	14.4175 min, 3.300 s	0.139	945
Benzaldehyde, 2-hydroxy-	1.09	122.04	XIC(122.04Â±500ppm)	3581903	799	1070	14.4175 min, 3.654 s	0.142	884
1,2,5-Dimethoxy-1,2,4-triazole	1.15	58.05	XIC(58.05Â±500ppm)	11889493	1317	1481	14.5009 min, 4.459 s	0.178	717
2H-Pyran-2-one, tetrahydro-	1.27	42.03	XIC(42.03Â±500ppm)	12841154	788	308	14.9176 min, 5.234 s	0.229	864
2-Cyclopenten-1-one, 3-ethyl-2-hydroxy-	1.91	43.05	XIC(43.05Â±500ppm)	1233803	142	86	15.0009 min, 3.242 s	0.154	754
Acetic acid, phenyl ester	1.07	94.04	XIC(94.04Â±500ppm)	4891950	793	850	15.3343 min, 3.422 s	0.139	888
2-Cyclopenten-1-one, 2,3,4-trimethyl-	1.31	109.07	XIC(109.07Â±500ppm)	3200103	429	1025	15.4176 min, 3.248 s	0.146	814
Benzaldehyde, 2-methyl-	1.43	91.06	XIC(91.06Â±500ppm)	5573398	1116	844	15.5843 min, 3.620 s	0.151	918
Benzyl nitrile	1.43	117.06	XIC(117.06Â±500ppm)	6444722	1740	1575	15.5843 min, 3.756 s	0.162	817
Bicyclo[3.3.1]nonane	1.1	124.05	XIC(124.05Â±500ppm)	489688	264	313	15.751 min, 4.067 s	0.148	753
2,3-Dimethyl-4-hydroxy-2-butenoic lactone	1.17	55.07	XIC(55.07Â±500ppm)	2462528	879	374	15.8343 min, 4.350 s	0.163	749
2-Hydroxy-3,5-dimethylcyclopent-2-en-1-one	3.73	43.04	XIC(43.04Â±500ppm)	725333	129	57	15.9177 min, 3.374 s	0.139	782
2-Cyclopenten-1-one, 3-ethyl-	1.47	81.04	XIC(81.04Â±500ppm)	4310752	730	831	16.001 min, 3.819 s	0.148	836
Phenol, 3-methyl-	1.16	107.05	XIC(107.05Â±500ppm)	83780012	3932	4952	16.0843 min, 3.215 s	0.128	940
Benzofuran, 2,3-dihydro-	0.97	91.06	XIC(91.06Â±500ppm)	4509681	500	502	16.0843 min, 3.754 s	0.141	773
1,2,4-Triazin-3-amine, 5,6-dimethyl-	1.11	124.05	XIC(124.05Â±500ppm)	2219124	804	1214	16.251 min, 4.146 s	0.157	735
Phenol, 2-methoxy-	1.11	109.03	XIC(109.03Â±500ppm)	69023057	2416	4795	16.5844 min, 3.602 s	0.14	910
Benzonitrile, 2-methyl-	1.36	117.06	XIC(117.06Â±500ppm)	5052579	977	1536	16.5844 min, 3.780 s	0.146	906
2,5-Pyrrolidinedione, 1-methyl-	1.39	113.05	XIC(113.05Â±500ppm)	9440488	1075	2715	16.6677 min, 5.401 s	0.201	926
Cyclopropyl carbinol	0.53	44.04	XIC(44.04Â±500ppm)	6480927	182	98	16.7511 min, 5.161 s	0.189	758
Benzoic acid, methyl ester	1.16	105.03	XIC(105.03Â±500ppm)	19657736	1043	3036	16.9177 min, 3.451 s	0.134	957
4-Hepten-3-one, 4-methyl-	1.28	97.04	XIC(97.04Â±500ppm)	3553659	378	1130	16.9177 min, 3.879 s	0.17	775
Benzofuran, 2-methyl-	1.06	131.05	XIC(131.05Â±500ppm)	3175000	668	1443	17.0011 min, 3.310 s	0.135	892
2-Ethyl-3-methylcyclopent-2-en-1-one	2.87	81.07	XIC(81.07Â±500ppm)	1385644	414	340	17.2511 min, 3.451 s	0.164	769
Benzonitrile, 3-methyl-	1.4	117.06	XIC(117.06Â±500ppm)	1877659	856	644	17.2511 min, 3.838 s	0.144	929
Phenol, 2,6-dimethyl-	1.13	122.07	XIC(122.07Â±500ppm)	14528541	1262	2556	17.4178 min, 3.389 s	0.135	877
3,4-Dimethylanisole	1.15	136.09	XIC(136.09Â±500ppm)	2021060	367	924	17.5011 min, 3.004 s	0.126	840
1H-Imidazole, 1-methyl-4-nitro-	1.37	42.06	XIC(42.06Â±500ppm)	6439302	1314	286	17.5011 min, 4.563 s	0.185	711
Benzene, 1,3-diethenyl-	1.03	130.08	XIC(130.08Â±500ppm)	467321	247	350	17.7511 min, 3.066 s	0.12	765
5-Oxotetrahydrofuran-2-carboxylic acid	1.12	85.02	XIC(85.02Â±500ppm)	16048773	896	2583	18.0012 min, 4.803 s	0.153	742
4-Methylurazole	1.23	115.03	XIC(115.03Â±500ppm)	13751844	1776	2747	18.1678 min, 4.251 s	0.168	766
Phenol, 2-ethyl-	1.13	107.05	XIC(107.05Â±500ppm)	9608457	1625	1789	19.0012 min, 3.219 s	0.124	916
2-Hydroxy-5-ethyl-5-methylcyclopent-2-en-1-one	1.13	94.04	XIC(94.04Â±500ppm)	610864	145	158	19.3346 min, 3.179 s	0.125	715
1H-Indene, 1-methyl-	1.03	130.08	XIC(130.08Â±500ppm)	7589829	893	3384	19.3346 min, 3.312 s	0.125	919
Phenol, 2,4-dimethyl-	1.11	107.05	XIC(107.05Â±500ppm)	32531205	2499	3449	19.4179 min, 3.284 s	0.123	903
Benzene, 1,2-dimethoxy-	1.44	138.07	XIC(138.07Â±500ppm)	2070969	775	859	19.4179 min, 3.779 s	0.158	837
1H-Indene, 3-methyl-	0.88	130.08	XIC(130.08Â±500ppm)	1602738	394	814	19.668 min, 3.390 s	0.135	901
Naphthalene, 1,2-dihydro-	1.17	128.06	XIC(128.06Â±500ppm)	964950	416	366	20.0013 min, 3.537 s	0.135	868
Benzene, 1,3-dimethoxy-	1.07	138.07	XIC(138.07Â±500ppm)	525856	216	488	20.2513 min, 3.683 s	0.136	800
Ethanone, 1-(3-methylphenyl)-	1.2	119.05	XIC(119.05Â±500ppm)	1367475	370	498	20.5014 min, 3.676 s	0.134	855
Naphthalene, 1,2-dihydro-4-methyl-	0.91	129.07	XIC(129.07Â±500ppm)	659277	231	326	20.7514 min, 3.140 s	0.132	883
Ethyl-2-benzofuran	1.1	131.05	XIC(131.05Â±500ppm)	1403609	601	667	20.9181 min, 3.310 s	0.127	863
Phenol, 2-ethyl-6-methyl-	1.19	121.07	XIC(121.07Â±500ppm)	2951538	542	1044	21.0847 min, 3.359 s	0.128	803
1H-Indene, 2,3-dihydro-1,2-dimethyl-	0.96	131.09	XIC(131.09Â±500ppm)	472894	190	220	21.1681 min, 2.930 s	0.125	828
Oxirane, (1-methylbutyl)-	1.14	55.06	XIC(55.06Â±500ppm)	1203169	197	191	21.4181 min, 5.431 s	0.169	724
Phenol, 3,4-dimethyl-	1.2	107.05	XIC(107.05Â±500ppm)	3375215	674	764	21.5014 min, 3.431 s	0.128	815
Creosol	1.15	123.05	XIC(123.05Â±500ppm)	5363492	639	1749	21.5014 min, 3.472 s	0.129	865
2,5-Dimethylbenzonitrile	1.27	116.05	XIC(116.05Â±500ppm)	623660	258	241	21.5014 min, 3.673 s	0.144	702
Benzofuran, 4,7-dimethyl-	1.1	146.08	XIC(146.08Â±500ppm)	2456803	905	2434	21.8348 min, 3.290 s	0.126	828
Phenol, 2,4,6-trimethyl-	1.08	121.07	XIC(121.07Â±500ppm)	5688012	768	1734	21.9181 min, 3.364 s	0.125	905
2-Propenal, 3-(2-furanyl)-	1.34	122.04	XIC(122.04Â±500ppm)	1274536	694	527	22.3348 min, 5.068 s	0.177	718
Tricyclo[4.2.1.1(2,5)]deca-3,7-diene-9,10-dione, (1a,2ÃŸ,5ÃŸ,6a)-	1.07	131.05	XIC(131.05Â±500ppm)	3182447	1453	955	22.5849 min, 4.590 s	0.162	835
1H-Indazole, 5,7-dimethyl-	0.96	131.05	XIC(131.05Â±500ppm)	1236439	465	561	22.6682 min, 3.378 s	0.119	798
Benzothiazole	2.04	135.02	XIC(135.02Â±500ppm)	971768	213	302	22.7515 min, 4.615 s	0.172	724
3,4-Anhydro-d-galactosan	1.05	71.02	XIC(71.02Â±500ppm)	397006	128	200	22.9182 min, 4.852 s	0.159	796
Phenol, 2-(1-methylethyl)-	1.12	121.07	XIC(121.07Â±500ppm)	2130889	532	948	23.1682 min, 3.210 s	0.118	863
Benzofuran, 2-ethenyl-	1.12	144.06	XIC(144.06Â±500ppm)	1202726	339	901	23.1682 min, 3.588 s	0.118	789
Quinoline	2.2	129.06	XIC(129.05Â±500ppm)	4649237	797	1004	23.3349 min, 4.426 s	0.168	946
Phenol, 4-ethyl-3-methyl-	1.14	121.07	XIC(121.07Â±500ppm)	4687940	1103	1720	23.5849 min, 3.273 s	0.114	889
Benzenepropanenitrile	1.37	91.06	XIC(91.06Â±500ppm)	1855357	520	289	23.5849 min, 4.559 s	0.166	849
3,4-Dimethoxytoluene	1.37	152.09	XIC(152.09Â±500ppm)	2023678	122	868	23.6683 min, 3.570 s	0.142	855
Carbamic acid, monoammonium salt	1.56	44	XIC(44.00Â±500ppm)	4153182	141	96	23.6683 min, 3.617 s	0.049	938
2-Ethyl-1-H-indene	1.15	129.07	XIC(129.07Â±500ppm)	951365	209	295	23.7516 min, 3.296 s	0.119	846
Phenol, 2-ethyl-4-methyl-	1.15	121.07	XIC(121.07Â±500ppm)	984775	375	418	23.835 min, 3.233 s	0.112	813
1H-1,2,4-Triazol-3-amine, 1-methyl-	1.51	43.04	XIC(43.04Â±500ppm)	2228528	488	168	24.5017 min, 3.591 s	0.141	712
Phenol, 3-ethyl-5-methyl-	2.1	121.07	XIC(121.07Â±500ppm)	2222401	539	935	24.585 min, 3.257 s	0.127	833
1,4-Benzenedicarboxaldehyde, 2-methyl-	1.15	148.06	XIC(148.06Â±500ppm)	313662	167	261	24.7517 min, 3.770 s	0.108	710
3,5-Dimethoxytoluene	1.13	152.09	XIC(152.09Â±500ppm)	844740	362	486	24.835 min, 3.521 s	0.129	837
Octane, 2,3,7-trimethyl-	1.12	57.09	XIC(57.09Â±500ppm)	696611	275	238	25.1684 min, 1.791 s	0.076	906
1H-Inden-1-one, 2,3-dihydro-	1.25	104.06	XIC(104.06Â±500ppm)	5311547	764	1077	25.2517 min, 4.664 s	0.165	904
2(3H)-Furanone, 3-acetyldihydro-3-methyl-	1.17	43.04	XIC(43.04Â±500ppm)	3200963	252	227	25.3351 min, 5.454 s	0.164	781
Phenol, 4-ethyl-2-methoxy-	1.16	137.06	XIC(137.06Â±500ppm)	9340595	1556	2396	25.4184 min, 3.370 s	0.119	881
1H-Inden-1-one, 2,3-dihydro-3-methyl-	1.35	131.05	XIC(131.05Â±500ppm)	679392	338	254	25.6684 min, 4.241 s	0.153	809
(1R,3S,4R,5S)-1-Isopropyl-4-methylbicyclo[3.1.0]hexan-3-yl acetate-rel-	0.64	44.01	XIC(44.01Â±500ppm)	754982	112	16	25.7518 min, 2.786 s	0.122	758
Naphthalene, 1-methyl-	1.05	142.08	XIC(142.08Â±500ppm)	20967375	2414	7842	25.8351 min, 3.747 s	0.126	923
2-Tridecene, (Z)-	1.35	41.06	XIC(41.06Â±500ppm)	363707	106	46	26.0018 min, 1.947 s	0.069	920
1H-Indene, 2,3-dihydro-1,1,3-trimethyl-	1.08	145.07	XIC(145.07Â±500ppm)	675861	309	548	26.0018 min, 3.250 s	0.123	760
2,5,6-Trimethylbenzimidazole	1.08	160.09	XIC(160.09Â±500ppm)	3321111	1018	2732	26.7519 min, 3.250 s	0.114	771
1-Methylindan-2-one	1.47	131.05	XIC(131.05Â±500ppm)	565949	225	236	26.9185 min, 4.282 s	0.177	791
1,2,3-Trimethoxybenzene	1.4	168.08	XIC(168.08Â±500ppm)	610852	228	470	27.0019 min, 3.879 s	0.147	860
Benzene, 4-ethyl-1,2-dimethoxy-	1.2	151.08	XIC(151.08Â±500ppm)	486278	213	296	27.4186 min, 3.449 s	0.123	782
7-Methylindan-1-one	1.23	146.08	XIC(146.08Â±500ppm)	622479	400	432	28.3353 min, 4.298 s	0.142	777
Phenol, 2,6-dimethoxy-	1.12	154.07	XIC(154.07Â±500ppm)	18028647	1518	3133	28.5853 min, 4.209 s	0.137	884
2-Propenal, 2-methyl-3-phenyl-	1.14	145.07	XIC(145.07Â±500ppm)	466517	199	253	28.6687 min, 4.546 s	0.142	737
Eugenol	1.13	164.09	XIC(164.09Â±500ppm)	1075087	615	824	28.8354 min, 3.450 s	0.116	900
Phenol, 2-methoxy-4-propyl-	1.16	137.06	XIC(137.06Â±500ppm)	1819962	1203	950	29.2521 min, 3.254 s	0.113	867
Benzoic acid, 4-methoxy-, methyl ester	1.28	135.05	XIC(135.05Â±500ppm)	6199858	1212	1366	29.5021 min, 3.903 s	0.129	903
1,3,5-Triazine-2,4,6(1H,3H,5H)-trione, 1,3,5-trimethyl-	1.35	58.05	XIC(58.05Â±500ppm)	11429311	2643	1522	29.8354 min, 4.605 s	0.16	959
Hydrocoumarin	1.13	120.06	XIC(120.06Â±500ppm)	534498	414	297	29.8354 min, 5.024 s	0.16	853
2,4-Azetidinedione, 3-ethyl-3-phenyl-	1.18	117.08	XIC(117.08Â±500ppm)	392388	166	194	30.0855 min, 4.400 s	0.137	777
Naphthalene, 1-ethyl-	1.08	141.07	XIC(141.07Â±500ppm)	1929405	496	1225	30.1688 min, 3.617 s	0.115	867
1,1'-Biphenyl, 2-methyl-	1.07	168.1	XIC(168.10Â±500ppm)	233525	157	247	30.5022 min, 3.559 s	0.111	861
Vanillin	1.12	151.04	XIC(151.04Â±500ppm)	2225145	1465	864	30.5022 min, 4.567 s	0.147	918
Naphthalene, 2,7-dimethyl-	1.02	156.1	XIC(156.10Â±500ppm)	1828918	339	1550	30.5855 min, 3.608 s	0.12	870
Acenaphthylene	1.07	152.07	XIC(152.07Â±500ppm)	1067784	339	519	30.5855 min, 4.046 s	0.129	908
Benzimidazole, 4,5,6,7-tetramethyl-	1.09	159.09	XIC(159.09Â±500ppm)	324085	277	382	30.7522 min, 3.127 s	0.108	710
Benzene, 1,2,3-trimethoxy-5-methyl-	1.26	167.08	XIC(167.08Â±500ppm)	488039	249	388	30.9189 min, 3.634 s	0.126	841
Acenaphthene	1.08	153.07	XIC(153.07Â±500ppm)	661934	316	433	30.9189 min, 3.933 s	0.124	909
Naphthalene, 1,4-dimethyl-	1.06	156.1	XIC(156.10Â±500ppm)	3516829	424	2523	31.2522 min, 3.703 s	0.14	916
Cyclohexane, octyl-	0.98	83.09	XIC(83.09Â±500ppm)	314887	162	182	32.5023 min, 2.121 s	0.072	842
3,5-Dimethoxy-4-hydroxytoluene	1.07	168.08	XIC(168.08Â±500ppm)	1833188	650	1217	32.5857 min, 3.935 s	0.129	764
5-Ethyldecane	1.12	57.09	XIC(57.09Â±500ppm)	264948	103	92	32.669 min, 1.847 s	0.065	862
Dimethyl phthalate	1.26	163.04	XIC(163.04Â±500ppm)	1359730	788	921	32.919 min, 4.242 s	0.146	871
2,3,4,5-Tetrahydropyridazine	1.15	84.05	XIC(84.05Â±500ppm)	1700425	1037	911	33.5024 min, 2.643 s	0.087	766
1,1'-Biphenyl, 3-methyl-	1.13	168.1	XIC(168.10Â±500ppm)	798073	462	770	34.0024 min, 3.653 s	0.114	902
Apocynin	1.09	151.04	XIC(151.04Â±500ppm)	577752	251	338	34.0858 min, 4.421 s	0.134	867
1-Naphthalenecarbonitrile	1.58	153.06	XIC(153.06Â±500ppm)	2101243	1004	863	34.2525 min, 4.774 s	0.166	945
Naphthalene, 2-(1-methylethyl)-	1.02	155.09	XIC(155.09Â±500ppm)	333442	194	260	34.6692 min, 3.471 s	0.118	825
Decane, 2,3,7-trimethyl-	1.98	57.09	XIC(57.09Â±500ppm)	283170	136	96	35.0859 min, 1.830 s	0.096	865
2-Naphthalenecarbonitrile	1.44	153.06	XIC(153.06Â±500ppm)	1265962	607	529	35.3359 min, 4.803 s	0.159	917
Homovanillyl alcohol	1.04	137.06	XIC(137.06Â±500ppm)	1528113	398	1057	35.9193 min, 4.290 s	0.133	716
Ethylene glycol adipate	1.22	129.06	XIC(129.06Â±500ppm)	2516986	792	876	36.2526 min, 4.031 s	0.147	747
4-Nitroguaiacol	1.31	169.04	XIC(169.03Â±500ppm)	386634	149	229	36.336 min, 4.572 s	0.134	830
1H-Phenalene	1.07	165.07	XIC(165.07Â±500ppm)	649463	340	443	36.9193 min, 4.219 s	0.123	859
Fluorene	1.13	166.08	XIC(166.08Â±500ppm)	2757184	705	1582	37.6694 min, 4.234 s	0.133	922
9H-Fluorene, 9-methyl-	1.14	165.07	XIC(165.07Â±500ppm)	372236	199	266	38.5028 min, 4.014 s	0.126	831
Phenol, 2,6-dimethoxy-4-(2-propenyl)-	1.14	194.1	XIC(194.10Â±500ppm)	444974	308	442	38.7528 min, 3.755 s	0.111	861
Dibenzofuran, 4-methyl-	0.95	182.08	XIC(182.08Â±500ppm)	461057	194	517	39.1695 min, 3.945 s	0.123	873
9H-Xanthene	1.05	182.08	XIC(182.08Â±500ppm)	607051	271	532	39.5862 min, 3.959 s	0.12	865
Benzene, (1-propyloctyl)-	1.04	91.06	XIC(91.06Â±500ppm)	673498	195	172	40.2529 min, 2.334 s	0.084	915
Benzaldehyde, 4-hydroxy-3,5-dimethoxy-	0.99	44.01	XIC(44.01Â±500ppm)	606571	162	18	40.8363 min, 4.752 s	0.152	766
Benzene, (1-ethylnonyl)-	1.21	91.06	XIC(91.06Â±500ppm)	619830	188	149	41.003 min, 2.364 s	0.078	868
Benzene, (1-methyldecyl)-	1.12	105.07	XIC(105.07Â±500ppm)	1049399	474	422	42.3364 min, 2.394 s	0.077	879
Hexadecane, 2,6,10,14-tetramethyl-	1.74	57.09	XIC(57.09Â±500ppm)	601354	224	184	42.5031 min, 1.786 s	0.064	896
Benzene, (1-pentylheptyl)-	1.17	91.06	XIC(91.06Â±500ppm)	565848	175	141	43.3365 min, 2.281 s	0.08	900
Benzene, (1-butyloctyl)-	1.1	91.06	XIC(91.06Â±500ppm)	513650	159	137	43.5032 min, 2.294 s	0.083	860
2-Propanol, 1-chloro-, phosphate (3:1)	1.69	41.06	XIC(41.06Â±500ppm)	10324947	4555	734	45.8367 min, 3.506 s	0.129	735
Bis(1-chloro-2-propyl)(3-chloro-1-propyl)phosphate	1.6	41.06	XIC(41.06Â±500ppm)	1736118	257	130	46.3368 min, 3.477 s	0.154	793
Benzoic acid, undecyl ester	0.28	44.01	XIC(44.01Â±500ppm)	298256	114	7	48.7536 min, 2.735 s	0.102	738
1,2-Benzenedicarboxylic acid, butyl 2-ethylhexyl ester	1.12	149.03	XIC(149.03Â±500ppm)	3888967	2004	2135	49.587 min, 3.282 s	0.109	904
3-methoxy-4-hydroxy-methyl-nitrostyrene	2.62	41.04	XIC(41.04Â±500ppm)	423178	145	39	49.6704 min, 4.409 s	0.16	825
Phthalic acid, isobutyl nonyl ester	1.09	149.03	XIC(149.03Â±500ppm)	842940	548	810	50.2537 min, 3.137 s	0.106	790
Dibutyl phthalate	1.14	149.03	XIC(149.03Â±500ppm)	2277398	816	1469	51.0871 min, 3.330 s	0.106	869
1,2-Benzenedicarboxylic acid, butyl octyl ester	1.12	149.03	XIC(149.03Â±500ppm)	1242805	655	1003	51.7539 min, 3.184 s	0.108	822

## Sheet: Prosopis spp (SPE7)
Name	Tailing.Factor	Base.Mass	Quant.Masses	Area	Peak.S.N	Quant.S.N	R.T...min.	FWHH..s.	Similarity
Butane, 1-ethoxy-	1.17	59.06	XIC(59.06Â±500ppm)	4811425	445	544	3.66668 min, 6.450 s	0.072	764
1-Butanol, 3-methyl-	1.43	55.07	XIC(55.07Â±500ppm)	5726618	625	776	3.83336 min, 1.688 s	0.104	879
Propyl pyruvate	0.3	43.03	XIC(43.03Â±500ppm)	16304917	312	557	3.83336 min, 6.497 s	0.134	822
Butane, 2-ethoxy-	0.7	45.05	XIC(45.05Â±500ppm)	177481102	1405	3712	3.9167 min, 1.528 s	0.124	784
3-Penten-2-one	1.28	69.04	XIC(69.04Â±500ppm)	25255879	1815	3947	3.9167 min, 1.958 s	0.103	864
Propargylamine	1.1	54.06	XIC(54.06Â±500ppm)	2449164	202	415	4.00004 min, 2.087 s	0.155	705
Pyridine	2.46	79.04	XIC(79.03Â±500ppm)	120341609	5169	6035	4.00004 min, 2.127 s	0.137	942
Furan, 2-methyl-	1.8	53.06	XIC(53.06Â±500ppm)	10038178	1128	1259	4.08338 min, 2.091 s	0.105	703
Furan, 2,3-dihydro-4-methyl-	2.8	55.07	XIC(55.07Â±500ppm)	2656339	297	571	4.16672 min, 2.010 s	0.092	827
2-Butenoic acid, methyl ester	1.29	69.04	XIC(69.04Â±500ppm)	5038322	923	1269	4.3334 min, 1.944 s	0.097	833
Oxazolidine, 3-methyl-2-propyl-	1.17	86.04	XIC(86.04Â±500ppm)	19103898	4116	6415	4.3334 min, 2.411 s	0.12	824
1-Hydroxy-2-butanone	1.42	57.05	XIC(57.05Â±500ppm)	90607104	5229	4854	4.41674 min, 2.191 s	0.113	932
Ethanol	7.34	45.05	XIC(45.05Â±500ppm)	1662653	107	86	4.41674 min, 6.251 s	0.069	822
Heptane, 3-methyl-	0.72	43.07	XIC(43.07Â±500ppm)	40988423	977	1386	4.41674 min, 6.485 s	0.091	705
4-Hexen-3-one	1.18	69.04	XIC(69.04Â±500ppm)	3054888	698	724	4.50008 min, 1.899 s	0.105	795
N-Methyl-2-tert.-butoxycarbonylazetidine	0.52	70.08	XIC(70.08Â±500ppm)	12894617	274	1332	4.58342 min, 1.572 s	0.042	732
2(5H)-Furanone	1.25	55.04	XIC(55.04Â±500ppm)	2730645	966	296	4.58342 min, 2.567 s	0.119	834
Butanoic acid	1.15	60.03	XIC(60.03Â±500ppm)	90226578	4944	3788	4.7501 min, 1.803 s	0.099	931
2-Butene-1,4-diol, (Z)-	1.55	42.06	XIC(42.06Â±500ppm)	27409714	700	425	4.7501 min, 2.146 s	0.133	812
Cyclopentanone	1.23	55.04	XIC(55.04Â±500ppm)	59555787	3377	3812	4.91678 min, 2.436 s	0.13	908
Cyclohexane, 1,2-dimethyl-, trans-	1.34	55.07	XIC(55.07Â±500ppm)	10154710	1853	1215	5.08346 min, 1.650 s	0.144	866
Propanenitrile, 3,3'-oxybis-	1.31	84.02	XIC(84.02Â±500ppm)	75301208	8250	7277	5.08346 min, 2.835 s	0.14	755
2-Furancarbonitrile	1.19	93.02	XIC(93.02Â±500ppm)	746728	339	359	5.25014 min, 2.439 s	0.108	723
Hexahydro-1,3,5-trinitroso-1,3,5-triazine	0.23	42.06	XIC(42.06Â±500ppm)	2501307	174	68	5.33348 min, 2.433 s	0.127	734
Pyridine, 2-methyl-	2.55	93.06	XIC(93.06Â±500ppm)	34051990	2682	2442	5.75018 min, 2.365 s	0.153	910
Pyrazine, methyl-	1.69	94.05	XIC(94.05Â±500ppm)	159805181	7541	6806	5.83352 min, 2.531 s	0.149	926
Methyl valerate	2.2	74.04	XIC(74.04Â±500ppm)	974016	315	241	5.91686 min, 1.987 s	0.113	784
1-Piperidineethanamine	1.14	98.04	XIC(98.04Â±500ppm)	1146816	394	579	5.91686 min, 2.561 s	0.121	760
Maleic anhydride	1.21	54.03	XIC(54.03Â±500ppm)	16084946	2868	2337	6.0002 min, 2.761 s	0.154	701
2-Hydroxy-2,6-dimethyl-hept-6-en-3-one	1.41	59.06	XIC(59.06Â±500ppm)	3821879	624	1214	6.08354 min, 2.197 s	0.144	755
2-Cyclopenten-1-one	1.51	82.04	XIC(82.04Â±500ppm)	160000741	6484	9968	6.08354 min, 3.040 s	0.164	799
1,2-Ethanediol, monoacetate	1.27	43.03	XIC(43.03Â±500ppm)	21937846	1709	941	6.66692 min, 2.691 s	0.142	970
2-Furanmethanol	1.21	98.03	XIC(98.03Â±500ppm)	71215255	4119	6567	6.8336 min, 2.666 s	0.137	877
Pyridine, 3-methyl-	2.97	93.06	XIC(93.06Â±500ppm)	31597712	937	1966	7.16696 min, 2.692 s	0.161	907
1,3-Pentadiene, 2,3-dimethyl-	1.24	81.04	XIC(81.04Â±500ppm)	8917321	1174	1121	7.2503 min, 2.925 s	0.163	787
2-Propanone, 1-(acetyloxy)-	1.16	43.04	XIC(43.04Â±500ppm)	288442707	4670	5095	7.33364 min, 2.959 s	0.163	967
Pyrimidine, 4-methyl-	2	94.05	XIC(94.05Â±500ppm)	6931385	1075	1057	7.50032 min, 2.917 s	0.152	715
Cyclohexene, 1-methyl-	1.25	81.04	XIC(81.04Â±500ppm)	4000042	675	874	7.58366 min, 2.967 s	0.156	814
2H-Pyran-3(4H)-one, dihydro-	2.65	42.05	XIC(42.05Â±500ppm)	6030716	400	239	7.75034 min, 3.197 s	0.173	935
4-Cyclopentene-1,3-dione	1.14	96.02	XIC(96.02Â±500ppm)	30464267	1606	3858	7.83368 min, 3.429 s	0.141	898
Butanoic acid, 2-methyl-, 2-methyl-2-propenyl ester	1.24	57.07	XIC(57.07Â±500ppm)	3568716	701	813	7.91702 min, 2.228 s	0.115	799
2-Heptanone	0.82	43.04	XIC(43.04Â±500ppm)	3784519	389	155	8.0837 min, 2.268 s	0.113	901
2-Hexenal, (E)-	1.24	55.04	XIC(55.04Â±500ppm)	8723244	891	819	8.0837 min, 3.040 s	0.176	764
2,6-Lutidine	1.89	107.07	XIC(107.07Â±500ppm)	1987279	279	491	8.16704 min, 2.530 s	0.166	732
p-Aminotoluene	2.45	106.07	XIC(106.07Â±500ppm)	4709802	751	870	8.66708 min, 2.681 s	0.162	826
Ethanone, 1-(2-furanyl)-	1.29	95.01	XIC(95.01Â±500ppm)	75493034	5529	5663	8.75042 min, 3.182 s	0.157	899
Pyrazine, 2,6-dimethyl-	1.71	108.07	XIC(108.07Â±500ppm)	5750677	354	1454	8.83376 min, 2.877 s	0.195	855
Methyl acetoxyacetate	1.83	43.04	XIC(43.04Â±500ppm)	16836699	841	696	8.83376 min, 2.979 s	0.149	928
2-Cyclopenten-1-one, 2-hydroxy-	1.06	98.04	XIC(98.04Â±500ppm)	1375110	265	479	8.83376 min, 3.703 s	0.156	716
Butanoic acid, 4-hydroxy-	1.31	42.06	XIC(42.06Â±500ppm)	114383115	2601	2194	8.83376 min, 4.481 s	0.171	931
Pyrazine, ethyl-	1.85	107.06	XIC(107.06Â±500ppm)	41771737	1848	3511	8.9171 min, 2.875 s	0.155	934
Bicyclobutylidene	1.22	79.06	XIC(79.06Â±500ppm)	2079536	259	249	9.25046 min, 3.021 s	0.176	706
Pyrazine, ethenyl-	1.43	106.05	XIC(106.05Â±500ppm)	1563622	393	471	9.50048 min, 3.158 s	0.155	865
2,5-Hexanedione	0.6	43.04	XIC(43.04Â±500ppm)	12036555	491	529	9.58382 min, 3.438 s	0.148	882
2-Cyclohexen-1-one	1.22	68.04	XIC(68.04Â±500ppm)	12997588	2087	1546	9.58382 min, 3.540 s	0.175	827
6-Hepten-3-one, 4-methyl-	1.2	57.05	XIC(57.05Â±500ppm)	3269015	1111	838	9.7505 min, 2.324 s	0.139	828
Pyridine, 3,5-dimethyl-	2.64	107.07	XIC(107.07Â±500ppm)	10315489	744	1036	9.7505 min, 2.796 s	0.168	882
2-Cyclopenten-1-one, 3,4-dimethyl-	1.17	67.07	XIC(67.07Â±500ppm)	7919835	931	972	9.91718 min, 2.949 s	0.161	827
2(5H)-Furanone, 5-methyl-	1.17	55.04	XIC(55.04Â±500ppm)	21782852	1306	1730	10.0005 min, 4.115 s	0.177	861
Pyridine, 2,3-dimethyl-	2.42	107.07	XIC(107.07Â±500ppm)	1641159	243	469	10.2505 min, 2.927 s	0.171	804
Cyclopentanone, 3,4-bis(methylene)-	1.19	79.06	XIC(79.06Â±500ppm)	3406226	762	501	10.5839 min, 3.111 s	0.148	817
4H-1,2,4-Triazol-3-amine, 4-methyl-	3.88	42.05	XIC(42.05Â±500ppm)	911298	317	41	10.7506 min, 3.124 s	0.18	711
4(3H)-Pyrimidinone, 3-methyl-	1.16	110.04	XIC(110.04Â±500ppm)	732282	150	345	10.8339 min, 3.488 s	0.143	730
2,3-Pentanedione	1.08	57.05	XIC(57.05Â±500ppm)	19855338	5068	4220	11.0006 min, 3.221 s	0.15	790
Bicyclo[2.2.1]heptane, 2,2,3-trimethyl-, endo-	1.17	95.02	XIC(95.02Â±500ppm)	531376	144	165	11.0839 min, 2.101 s	0.088	745
2-Butanone, 1-(acetyloxy)-	1.52	43.04	XIC(43.04Â±500ppm)	28321216	1907	820	11.1673 min, 3.222 s	0.144	859
2H-Pyran-2-one	1.32	68.04	XIC(68.04Â±500ppm)	11319271	2723	2000	11.2506 min, 4.515 s	0.175	829
3-Hepten-2-one, 5-methyl-	0.34	41.06	XIC(41.06Â±500ppm)	1191178	257	79	11.4173 min, 2.405 s	0.174	720
Methyl 2-furoate	1.18	95.01	XIC(95.01Â±500ppm)	25423089	3120	4687	11.5006 min, 3.392 s	0.149	944
4-Methyl-5H-furan-2-one	1.04	41.06	XIC(41.06Â±500ppm)	24613175	3966	1246	11.584 min, 4.409 s	0.178	831
Pentanoic acid, 4-oxo-, methyl ester	1.16	43.04	XIC(43.04Â±500ppm)	4456904	368	219	12.084 min, 3.493 s	0.189	911
Benzene, 2-propenyl-	0.96	117.07	XIC(117.07Â±500ppm)	2499739	585	965	12.2507 min, 2.752 s	0.126	903
Benzene, 1,1'-(1-ethenyl-1,3-propanediyl)bis-	1.05	117.07	XIC(117.07Â±500ppm)	2576121	413	890	12.334 min, 2.792 s	0.131	862
Benzofuran	1.09	118.04	XIC(118.04Â±500ppm)	22518600	1092	8943	12.334 min, 3.213 s	0.139	936
2-Cyclohexen-1-one, 3-methyl-	1.2	82.05	XIC(82.05Â±500ppm)	2229828	394	513	12.334 min, 3.396 s	0.164	774
Pyridine, 3-methoxy-	2.76	109.05	XIC(109.05Â±500ppm)	7123284	1122	1127	12.5841 min, 3.611 s	0.166	885
2-Furanone, 2,5-dihydro-3,5-dimethyl	1.27	69.04	XIC(69.04Â±500ppm)	17047439	1585	1911	12.6674 min, 3.904 s	0.171	865
1H-Pyrrole-2-carboxaldehyde, 1-methyl-	0.66	109.05	XIC(109.05Â±500ppm)	3144381	249	740	12.7507 min, 3.816 s	0.145	897
2-Oxovaleric acid, methyl ester	1.34	71.06	XIC(71.06Â±500ppm)	36418827	1960	3593	12.9174 min, 3.452 s	0.172	800
Benzene, 1-methoxy-2-methyl-	1.1	122.07	XIC(122.07Â±500ppm)	1715099	349	976	13.0008 min, 2.955 s	0.144	903
Allophanic acid, phenyl ester	0.85	44.01	XIC(44.01Â±500ppm)	1549143	159	25	13.2508 min, 2.741 s	0.115	774
3-Ethenyl-3-methylcyclopentanone	1.1	68.04	XIC(68.04Â±500ppm)	3725196	277	495	13.2508 min, 3.800 s	0.165	701
Benzene, 1-methoxy-3-methyl-	1.1	122.07	XIC(122.07Â±500ppm)	12529397	1890	5346	13.4175 min, 3.026 s	0.132	928
2-Cyclopenten-1-one, 3,4,4-trimethyl-	1.43	81.08	XIC(81.08Â±500ppm)	840259	231	220	13.6675 min, 3.053 s	0.154	790
1,2-Cyclopentanedione, 3-methyl-	1.17	112.05	XIC(112.05Â±500ppm)	12685947	3069	2874	13.6675 min, 3.574 s	0.143	896
Oxalic acid, isobutyl heptyl ester	1.18	57.09	XIC(57.09Â±500ppm)	1280285	410	300	13.7508 min, 1.798 s	0.136	749
1,4-Cyclohex-2-enedione	1.14	54.04	XIC(54.04Â±500ppm)	2922787	553	601	13.8342 min, 4.048 s	0.149	846
Ethanone, 1-(2-pyridinyl)-	1.25	79.06	XIC(79.06Â±500ppm)	1559675	251	242	14.0008 min, 3.657 s	0.196	720
Benzyl alcohol	1.26	79.06	XIC(79.06Â±500ppm)	4430467	1468	489	14.0842 min, 3.613 s	0.182	861
4-Oxohex-2-enal	1.14	83.04	XIC(83.04Â±500ppm)	3216130	1187	840	14.2509 min, 4.249 s	0.168	831
1H-Indene, 1-chloro-2,3-dihydro-	1.07	115.06	XIC(115.06Â±500ppm)	26867350	2597	5962	14.4175 min, 3.302 s	0.142	941
Benzaldehyde, 2-hydroxy-	1.65	44	XIC(44.00Â±500ppm)	4716942	171	109	14.4175 min, 3.665 s	0.052	827
Pyrrolidine, 1-methyl-	1.22	84.05	XIC(84.05Â±500ppm)	1482465	575	515	14.5842 min, 3.866 s	0.166	721
2H-Pyran-2-one, tetrahydro-	1.24	42.03	XIC(42.03Â±500ppm)	5320610	243	166	14.9176 min, 5.238 s	0.197	858
Acetic acid, phenyl ester	1.07	94.04	XIC(94.04Â±500ppm)	2504007	457	464	15.3343 min, 3.421 s	0.135	826
2,3,5-Trimethylcyclopent-2-enone	1.32	109.07	XIC(109.07Â±500ppm)	3088435	887	941	15.4176 min, 3.244 s	0.159	833
Benzaldehyde, 2-methyl-	1.33	91.06	XIC(91.06Â±500ppm)	16258771	3175	1349	15.5843 min, 3.621 s	0.147	920
Cyclohexanone, 3-ethenyl-	1.1	124.05	XIC(124.05Â±500ppm)	931632	297	485	15.751 min, 4.071 s	0.143	799
2,3-Dimethyl-4-hydroxy-2-butenoic lactone	1.22	55.07	XIC(55.07Â±500ppm)	2411197	559	354	15.8343 min, 4.354 s	0.168	744
2-Cyclopenten-1-one, 3-ethyl-	1.45	81.04	XIC(81.04Â±500ppm)	4947993	1052	827	15.9177 min, 3.847 s	0.153	834
Dihydro-3-methylene-5-methyl-2-furanone	1.22	68.04	XIC(68.04Â±500ppm)	19714948	3635	2818	15.9177 min, 4.769 s	0.181	894
Benzofuran, 2,3-dihydro-	0.92	91.06	XIC(91.06Â±500ppm)	7002241	439	714	16.0843 min, 3.758 s	0.14	786
1,2,4-Triazin-3-amine, 5,6-dimethyl-	1.16	124.05	XIC(124.05Â±500ppm)	3685208	1191	1515	16.251 min, 4.148 s	0.157	719
Benzene, 1-methyl-3-(1-methylethenyl)-	0.6	44.01	XIC(44.01Â±500ppm)	1626613	294	29	16.5844 min, 2.839 s	0.123	820
Phenol, 2-methoxy-	1.13	109.03	XIC(109.03Â±500ppm)	102179234	3010	5169	16.5844 min, 3.605 s	0.141	906
2,5-Pyrrolidinedione, 1-methyl-	1.42	113.05	XIC(113.05Â±500ppm)	10579142	1055	2734	16.6677 min, 5.402 s	0.201	916
Benzene, 1-ethenyl-4-ethyl-	1.09	117.07	XIC(117.07Â±500ppm)	634974	252	229	16.7511 min, 2.849 s	0.119	749
p-(1-Propenyl)-toluene	0.3	44	XIC(44.00Â±500ppm)	1275224	416	24	16.9177 min, 2.830 s	0.129	775
Benzoic acid, methyl ester	1.13	105.03	XIC(105.03Â±500ppm)	11091405	481	1859	16.9177 min, 3.450 s	0.133	937
4-Ethyl-2-hydroxycyclopent-2-en-1-one	1.27	97.04	XIC(97.04Â±500ppm)	3693244	880	1206	16.9177 min, 3.879 s	0.152	795
Benzofuran, 2-methyl-	1.04	131.05	XIC(131.05Â±500ppm)	9875328	1170	3926	17.0011 min, 3.314 s	0.137	908
5-Ethyl-2-furaldehyde	1.24	109.05	XIC(109.05Â±500ppm)	875466	247	244	17.0844 min, 3.449 s	0.151	773
2-Ethyl-3-methylcyclopent-2-en-1-one	2.88	81.07	XIC(81.07Â±500ppm)	1472743	398	373	17.2511 min, 3.455 s	0.164	757
Benzonitrile, 4-methyl-	1.39	117.06	XIC(117.06Â±500ppm)	2006444	936	671	17.2511 min, 3.840 s	0.142	934
Phenol, 3,4-dimethyl-	1.18	122.07	XIC(122.07Â±500ppm)	7959071	937	1379	17.4178 min, 3.389 s	0.138	800
3,4-(Methylenedioxy)toluene	1.04	135.05	XIC(135.05Â±500ppm)	1669924	423	566	17.4178 min, 3.421 s	0.127	811
1H-Imidazole, 1-methyl-4-nitro-	1.35	42.06	XIC(42.06Â±500ppm)	5761664	465	250	17.5011 min, 4.560 s	0.191	701
2,5-Dimethylanisole	1.7	136.09	XIC(136.09Â±500ppm)	4198465	1526	1671	17.5845 min, 2.960 s	0.142	906
1-Hexene, 3,4,5-trimethyl-	1.06	43.04	XIC(43.04Â±500ppm)	1971615	153	135	17.5845 min, 4.056 s	0.152	708
Benzene, 1,3-diethenyl-	1.1	130.08	XIC(130.08Â±500ppm)	770954	397	607	17.7511 min, 3.070 s	0.122	822
Benzene, 1-ethyl-4-methoxy-	1.08	121.07	XIC(121.07Â±500ppm)	3125655	491	624	17.7511 min, 3.098 s	0.123	873
3,5-Dimethylanisole	1.15	136.09	XIC(136.09Â±500ppm)	1819127	328	793	18.0012 min, 3.067 s	0.127	778
2-Cyclopenten-1-one, 3-ethyl-2-hydroxy-	1.15	55.07	XIC(55.07Â±500ppm)	1775814	435	214	18.0012 min, 3.507 s	0.133	872
Benzene, (2-methyl-1-propenyl)-	1.1	117.07	XIC(117.07Â±500ppm)	925863	272	393	18.2512 min, 2.940 s	0.143	886
Ethanone, 1-(2-methylphenyl)-	1.36	91.06	XIC(91.06Â±500ppm)	950012	292	191	18.8346 min, 3.599 s	0.151	840
Benzyl nitrile	1.32	117.06	XIC(117.06Â±500ppm)	4579776	1025	1209	18.9179 min, 4.436 s	0.16	948
Phenol, 2-ethyl-	1.14	107.05	XIC(107.05Â±500ppm)	7819129	1487	1557	19.0012 min, 3.221 s	0.122	916
1H-Indene, 3-methyl-	0.94	130.08	XIC(130.08Â±500ppm)	9013155	1017	3772	19.3346 min, 3.315 s	0.128	925
Benzene, 1,2-dimethoxy-	1.43	138.07	XIC(138.07Â±500ppm)	2902355	555	1168	19.4179 min, 3.779 s	0.16	865
Phenol, 2,6-dimethyl-	1.15	107.05	XIC(107.05Â±500ppm)	24714424	1706	3017	19.5013 min, 3.255 s	0.121	920
Acetic acid, 2-ethylhexyl ester	1.34	43.04	XIC(43.04Â±500ppm)	1246015	181	75	19.5846 min, 2.300 s	0.117	908
Benzene, 1-butynyl-	1.07	130.08	XIC(130.08Â±500ppm)	9245042	1356	3857	19.5846 min, 3.357 s	0.174	918
1H-1,4-Diazepine, hexahydro-1,4-dinitroso-	1.07	42.06	XIC(42.06Â±500ppm)	2938238	275	148	19.5846 min, 5.627 s	0.222	701
Benzaldehyde, 2-hydroxy-4-methyl-	1.02	135.05	XIC(135.05Â±500ppm)	494326	136	187	19.8346 min, 3.698 s	0.129	842
4-tert-Octylphenol, TMS derivative	1.78	207.04	XIC(207.04Â±500ppm)	9791890	143	1264	20.0013 min, 1.519 s	0.067	758
Naphthalene, 1,2-dihydro-	1.15	128.06	XIC(128.06Â±500ppm)	2109220	714	718	20.0013 min, 3.537 s	0.136	866
Benzaldehyde, 3-ethyl-	1.2	134.07	XIC(134.07Â±500ppm)	424777	166	252	20.0013 min, 3.565 s	0.128	794
1-Methylcyclooctene	1.29	81.05	XIC(81.05Â±500ppm)	405971	138	140	20.3347 min, 3.691 s	0.134	768
Ethanone, 1-(4-methylphenyl)-	1.21	119.05	XIC(119.05Â±500ppm)	2388693	740	755	20.5014 min, 3.684 s	0.136	891
Benzaldehyde, 2,4-dimethyl-	1.14	133.07	XIC(133.07Â±500ppm)	959251	246	419	20.5847 min, 3.583 s	0.134	849
Naphthalene, 1,2-dihydro-4-methyl-	0.91	129.07	XIC(129.07Â±500ppm)	632993	286	324	20.7514 min, 3.147 s	0.131	822
Phenol, 2,3-dimethyl-	1.14	107.05	XIC(107.05Â±500ppm)	3737002	641	961	20.8347 min, 3.414 s	0.127	858
Phenol, 4-methoxy-3-methyl-	1.09	123.05	XIC(123.05Â±500ppm)	2958599	445	1224	20.8347 min, 3.451 s	0.127	756
Ethyl-2-benzofuran	1.07	131.05	XIC(131.05Â±500ppm)	1915489	553	920	20.9181 min, 3.312 s	0.129	825
Benzoic acid, 3-methyl-	1.09	136.11	XIC(136.11Â±500ppm)	4021257	355	1023	21.0014 min, 3.753 s	0.134	766
Phenol, 2-ethyl-4-methyl-	1.12	121.07	XIC(121.07Â±500ppm)	1862355	325	611	21.0847 min, 3.361 s	0.126	788
1H-Indene, 2,3-dihydro-1,2-dimethyl-	1	131.09	XIC(131.09Â±500ppm)	955193	330	425	21.1681 min, 2.934 s	0.124	859
2-Methoxy-5-methylphenol	1.04	123.05	XIC(123.05Â±500ppm)	1048732	207	424	21.1681 min, 3.504 s	0.131	855
Benzo[c]thiophene	1.06	134.02	XIC(134.02Â±500ppm)	2941917	616	1724	21.2514 min, 4.107 s	0.139	924
Creosol	1.1	123.05	XIC(123.05Â±500ppm)	14428692	1128	2958	21.4181 min, 3.500 s	0.127	901
Phenol, 2,4-dimethyl-	1.19	107.05	XIC(107.05Â±500ppm)	5120167	649	982	21.5014 min, 3.436 s	0.125	807
Benzofuran, 4,7-dimethyl-	1.06	146.07	XIC(146.07Â±500ppm)	3344937	1114	3313	21.8348 min, 3.298 s	0.126	839
Phenol, 2,4,6-trimethyl-	1.12	121.07	XIC(121.07Â±500ppm)	2109965	558	963	21.9181 min, 3.365 s	0.126	886
Benzene, (ethenyloxy)-	1.21	120.06	XIC(120.06Â±500ppm)	1217501	451	548	22.3348 min, 3.503 s	0.123	712
Tricyclo[4.2.1.1(2,5)]deca-3,7-diene-9,10-dione, (1a,2ÃŸ,5ÃŸ,6a)-	1.09	131.05	XIC(131.05Â±500ppm)	5608771	1777	1436	22.5849 min, 4.595 s	0.166	847
2,3-Anhydro-d-galactosan	1.1	71.02	XIC(71.02Â±500ppm)	308802	196	154	22.9182 min, 4.850 s	0.17	787
1H-Benzimidazole, 5,6-dimethyl-	1.12	131.05	XIC(131.05Â±500ppm)	735422	263	354	23.0016 min, 3.420 s	0.125	809
Phenol, 2-ethyl-5-methyl-	1.11	121.07	XIC(121.07Â±500ppm)	3376055	613	1002	23.1682 min, 3.211 s	0.118	848
Phenol, 3,4,5-trimethyl-	0.31	121.07	XIC(121.07Â±500ppm)	838296	169	366	23.1682 min, 3.499 s	0.118	844
Benzofuran, 2-ethenyl-	1	144.06	XIC(144.06Â±500ppm)	2756199	412	1714	23.1682 min, 3.591 s	0.12	852
m-Guaiacol	1.39	124.05	XIC(124.05Â±500ppm)	387720	147	211	23.1682 min, 3.812 s	0.124	751
2-Coumaranone	1.09	78.06	XIC(78.06Â±500ppm)	912403	173	86	23.2516 min, 4.645 s	0.139	923
Quinoline	2.39	129.06	XIC(129.05Â±500ppm)	5741509	1000	909	23.3349 min, 4.428 s	0.171	954
Phenol, 4-ethyl-3-methyl-	1.09	121.07	XIC(121.07Â±500ppm)	5443958	1531	1624	23.5849 min, 3.277 s	0.116	892
Benzenepropanenitrile	1.31	91.06	XIC(91.06Â±500ppm)	4989493	941	462	23.5849 min, 4.565 s	0.163	871
3,4-Dimethoxytoluene	1.37	152.09	XIC(152.09Â±500ppm)	4348463	2252	1570	23.6683 min, 3.574 s	0.14	911
Phenol, 3-ethyl-5-methyl-	1.16	121.07	XIC(121.07Â±500ppm)	2161283	413	659	23.835 min, 3.236 s	0.115	836
1H-Indene, 2,3-dihydro-4,7-dimethyl-	1.3	131.09	XIC(131.09Â±500ppm)	658323	105	267	23.9183 min, 3.083 s	0.098	780
Phenol, 2-ethyl-4,5-dimethyl-	2.02	135.05	XIC(135.05Â±500ppm)	1168486	500	380	24.0016 min, 3.480 s	0.119	778
Benzene, hexyl-	1.04	91.06	XIC(91.06Â±500ppm)	778999	281	167	24.5017 min, 2.578 s	0.091	880
Phenol, 4-propyl-	1.16	107.05	XIC(107.05Â±500ppm)	1944291	689	680	24.5017 min, 3.227 s	0.111	870
1H-1,2,4-Triazol-5-amine, 1-methyl-	1.4	43.05	XIC(43.05Â±500ppm)	1384228	612	130	24.5017 min, 3.589 s	0.129	729
Benzofuran, 5-methoxy-	0.79	43.04	XIC(43.04Â±500ppm)	1696417	289	148	24.585 min, 4.046 s	0.135	779
2-Methyl-5-hydroxybenzofuran	1.08	148.06	XIC(148.06Â±500ppm)	617959	334	540	24.7517 min, 3.771 s	0.115	764
3,5-Dimethoxytoluene	1.11	152.09	XIC(152.09Â±500ppm)	2202195	651	1020	24.835 min, 3.519 s	0.128	892
Phenol, 2,3,5-trimethyl-	1.15	121.07	XIC(121.07Â±500ppm)	1531922	586	665	25.0851 min, 3.362 s	0.119	884
Octane, 2,3,7-trimethyl-	1.22	57.09	XIC(57.09Â±500ppm)	1432337	713	335	25.1684 min, 1.792 s	0.08	892
1H-Inden-1-one, 2,3-dihydro-	1.23	104.07	XIC(104.07Â±500ppm)	6694079	526	1353	25.2517 min, 4.664 s	0.153	892
Phenol, 4-ethyl-2-methoxy-	1.16	137.06	XIC(137.06Â±500ppm)	13323054	2051	3269	25.4184 min, 3.372 s	0.12	877
1H-Inden-1-one, 2,3-dihydro-3-methyl-	1.07	131.05	XIC(131.05Â±500ppm)	1151294	303	337	25.6684 min, 4.241 s	0.144	809
Naphthalene, 1-methyl-	1.05	142.08	XIC(142.08Â±500ppm)	41157723	3375	13116	25.8351 min, 3.748 s	0.126	922
2-Propenenitrile, 3-phenyl-, (E)-	1.34	129.06	XIC(129.06Â±500ppm)	810058	325	327	25.9185 min, 4.414 s	0.143	892
1H-Indene, 2,3-dihydro-1,1,3-trimethyl-	1.07	145.07	XIC(145.07Â±500ppm)	1023124	321	714	26.0018 min, 3.244 s	0.127	769
Indole	1.1	117.06	XIC(117.05Â±500ppm)	1329393	597	493	26.0018 min, 4.656 s	0.151	941
Ethanone, 1-[4-(1-methylethenyl)phenyl]-	1.15	145.07	XIC(145.07Â±500ppm)	1597768	596	928	26.2518 min, 3.239 s	0.131	794
1H-Inden-1-one, 2,3-dihydro-3,3-dimethyl-	1.23	145.07	XIC(145.07Â±500ppm)	4955436	1953	1987	26.7519 min, 3.247 s	0.115	782
1-Methylindan-2-one	1.46	131.05	XIC(131.05Â±500ppm)	745903	320	273	26.9185 min, 4.288 s	0.186	788
1,2,3-Trimethoxybenzene	1.37	168.08	XIC(168.08Â±500ppm)	434673	165	362	27.0019 min, 3.883 s	0.14	827
2,5,6-Trimethylbenzimidazole	0.88	160.09	XIC(160.09Â±500ppm)	424433	187	457	27.0852 min, 3.284 s	0.11	723
Benzene, 4-ethyl-1,2-dimethoxy-	1.25	151.08	XIC(151.08Â±500ppm)	809997	377	424	27.4186 min, 3.450 s	0.123	817
Phenol, 2,6-dimethyl-4-nitro-	2.13	91.06	XIC(91.06Â±500ppm)	362783	118	77	28.252 min, 3.474 s	0.108	768
7-Methylindan-1-one	1.35	117.08	XIC(117.08Â±500ppm)	722355	245	274	28.3353 min, 4.300 s	0.133	818
Phenol, 3-methoxy-2,5,6-trimethyl-	2.36	166.1	XIC(166.10Â±500ppm)	809429	180	631	28.5853 min, 3.254 s	0.113	750
Phenol, 2,6-dimethoxy-	1.05	154.07	XIC(154.07Â±500ppm)	1139034	322	467	28.5853 min, 4.203 s	0.135	838
Phenol, 2-methoxy-3-(2-propenyl)-	1.12	164.09	XIC(164.09Â±500ppm)	1914481	995	1353	28.8354 min, 3.447 s	0.117	904
Benzene, heptyl-	1.16	91.06	XIC(91.06Â±500ppm)	478220	168	121	29.002 min, 2.552 s	0.083	848
6-Methoxy-3-methylbenzofuran	1.08	162.07	XIC(162.07Â±500ppm)	1183896	334	1269	29.002 min, 3.816 s	0.13	765
Phenol, 2-methoxy-4-propyl-	1.12	137.06	XIC(137.06Â±500ppm)	2253441	1059	1223	29.2521 min, 3.256 s	0.11	881
Hydrocoumarin	0.35	44.01	XIC(44.01Â±500ppm)	338888	110	11	29.8354 min, 5.026 s	0.145	744
Naphthalene, 2-ethyl-	1.05	141.07	XIC(141.07Â±500ppm)	3043994	1462	1599	30.1688 min, 3.622 s	0.119	882
1,1'-Biphenyl, 2-methyl-	1.21	168.1	XIC(168.10Â±500ppm)	493630	292	507	30.5022 min, 3.554 s	0.119	898
Vanillin	1.13	151.04	XIC(151.04Â±500ppm)	2415039	755	957	30.5022 min, 4.566 s	0.152	922
Naphthalene, 1,7-dimethyl-	1.06	156.1	XIC(156.10Â±500ppm)	3780392	808	2632	30.5855 min, 3.611 s	0.12	931
Biphenylene	1.16	152.07	XIC(152.07Â±500ppm)	1555483	512	690	30.5855 min, 4.049 s	0.131	879
Benzimidazole, 4,5,6,7-tetramethyl-	1.19	159.08	XIC(159.08Â±500ppm)	761553	199	577	30.7522 min, 3.128 s	0.102	720
Benzene, 1,2,3-trimethoxy-5-methyl-	1.26	167.08	XIC(167.08Â±500ppm)	640912	315	491	30.9189 min, 3.641 s	0.131	832
Naphthalene, 1,4-dimethyl-	1.36	156.1	XIC(156.10Â±500ppm)	1396879	1200	1043	32.0023 min, 3.792 s	0.204	890
Acenaphthylene	1.07	152.07	XIC(152.07Â±500ppm)	37074850	2004	8265	32.3356 min, 4.425 s	0.144	964
Naphthalene, 1,2-dimethyl-	1.01	141.07	XIC(141.07Â±500ppm)	1054127	339	557	32.669 min, 3.897 s	0.12	857
5-Ethyldecane	1.49	57.09	XIC(57.09Â±500ppm)	288043	105	104	32.7523 min, 1.845 s	0.064	872
Benzene, octyl-	0.98	91.06	XIC(91.06Â±500ppm)	407298	151	109	33.3357 min, 2.513 s	0.076	883
2-Pyrrolidinone, 5-(ethoxymethyl)-	1.19	84.05	XIC(84.05Â±500ppm)	924249	496	544	33.5024 min, 2.640 s	0.087	745
Acenaphthene	1.07	153.07	XIC(153.07Â±500ppm)	1197343	413	731	33.8358 min, 4.243 s	0.137	926
1,1'-Biphenyl, 4-methyl-	1.1	168.1	XIC(168.10Â±500ppm)	2064099	887	1702	34.0024 min, 3.660 s	0.114	905
Ethanone, 1-(3-hydroxy-4-methoxyphenyl)-	1.1	151.04	XIC(151.04Â±500ppm)	759156	255	523	34.0858 min, 4.422 s	0.141	884
1-Naphthalenecarbonitrile	1.54	153.06	XIC(153.06Â±500ppm)	3823817	1298	1049	34.2525 min, 4.774 s	0.162	939
1-Naphthalenecarboxaldehyde	1.09	128.06	XIC(128.06Â±500ppm)	319997	114	126	34.5858 min, 4.860 s	0.14	859
Naphthalene, 2-(1-methylethyl)-	1.13	155.09	XIC(155.09Â±500ppm)	556961	364	390	34.6692 min, 3.475 s	0.114	839
2-Naphthalenecarboxaldehyde	1.37	127.06	XIC(127.06Â±500ppm)	337995	246	216	34.7525 min, 4.725 s	0.151	842
1-Isopropenylnaphthalene	1.04	153.08	XIC(153.08Â±500ppm)	268010	142	158	34.9192 min, 3.956 s	0.128	738
2-Naphthalenecarbonitrile	1.49	153.06	XIC(153.06Â±500ppm)	1722435	124	590	35.3359 min, 4.808 s	0.164	916
1,1,4,5,6-Pentamethyl-2,3-dihydro-1H-indene	1.04	173.14	XIC(173.14Â±500ppm)	250953	155	299	35.4192 min, 3.194 s	0.111	737
Naphthalene, 2,3,6-trimethyl-	1.14	170.11	XIC(170.11Â±500ppm)	961281	280	741	35.6692 min, 3.568 s	0.114	870
Naphthalene, 1,6,7-trimethyl-	1.14	170.11	XIC(170.11Â±500ppm)	827214	274	641	36.336 min, 3.642 s	0.132	882
4-Nitroguaiacol	1.33	169.04	XIC(169.03Â±500ppm)	504514	154	302	36.336 min, 4.565 s	0.142	846
1H-Phenalene	1.1	165.08	XIC(165.08Â±500ppm)	1024073	417	655	36.9193 min, 4.218 s	0.131	876
Fluorene	1.11	165.08	XIC(165.08Â±500ppm)	578389	263	392	37.4194 min, 4.306 s	0.132	851
Benzyl alcohol, 5-methoxy-a-methyl-2-nitro-	1.12	77.05	XIC(77.05Â±500ppm)	991416	421	180	38.5028 min, 3.682 s	0.116	710
9H-Fluorene, 9-methyl-	1.02	165.08	XIC(165.08Â±500ppm)	578841	249	432	38.5028 min, 4.014 s	0.125	883
9H-Xanthene	0.98	182.08	XIC(182.08Â±500ppm)	907200	431	892	39.1695 min, 3.946 s	0.126	866
Dibenzofuran, 4-methyl-	1.06	182.08	XIC(182.08Â±500ppm)	1839703	520	1600	39.5862 min, 3.961 s	0.126	887
2,4,6-Cycloheptatrien-1-one, 2-phenyl-	1.13	182.08	XIC(182.08Â±500ppm)	377242	169	367	40.0029 min, 4.118 s	0.118	834
Benzaldehyde, 4-hydroxy-3,5-dimethoxy-	1.05	182.06	XIC(182.06Â±500ppm)	275404	127	260	40.8363 min, 4.759 s	0.125	841
Hexadecane, 3-methyl-	0.9	57.09	XIC(57.09Â±500ppm)	220754	105	86	41.253 min, 1.863 s	0.062	889
9H-Fluorene, 2-methyl-	1.1	165.08	XIC(165.08Â±500ppm)	284396	119	213	41.8364 min, 4.027 s	0.125	895
9H-Fluorene, 4-methyl-	0.92	165.08	XIC(165.08Â±500ppm)	460376	177	301	41.9197 min, 4.072 s	0.156	872
9H-Fluoren-9-one	1.35	180.06	XIC(180.05Â±500ppm)	603117	441	405	43.2532 min, 4.865 s	0.153	933
1-Dodecanol, 3,7,11-trimethyl-	1.05	57.09	XIC(57.09Â±500ppm)	1828475	389	452	43.4199 min, 1.865 s	0.061	853
Naphtho[2,1-b]furan, 1,2-dimethyl-	1.01	196.1	XIC(196.10Â±500ppm)	250909	115	316	43.4199 min, 3.802 s	0.104	758
Phenanthrene	1.11	178.08	XIC(178.08Â±500ppm)	620845	216	411	45.0033 min, 4.730 s	0.149	916
2-Methylthio-5-nitro anisole	1.03	199.05	XIC(199.05Â±500ppm)	1588275	373	1154	45.5034 min, 4.720 s	0.14	702
Bis(1-chloro-2-propyl)(3-chloro-1-propyl)phosphate	1.81	41.06	XIC(41.06Â±500ppm)	1680464	332	151	45.8367 min, 3.505 s	0.149	708
Hexadecane, 2,6,10,14-tetramethyl-	1.79	57.09	XIC(57.09Â±500ppm)	563702	314	176	46.0867 min, 1.809 s	0.072	904
2-Pentadecanone, 6,10,14-trimethyl-	1	43.05	XIC(43.05Â±500ppm)	299490	110	45	47.2535 min, 2.194 s	0.071	854
1,2-Benzenedicarboxylic acid, butyl 2-ethylhexyl ester	1.09	149.03	XIC(149.03Â±500ppm)	15089222	1736	4699	49.587 min, 3.281 s	0.107	900
Phthalic acid, decyl isobutyl ester	1.15	149.03	XIC(149.03Â±500ppm)	4046172	1135	2350	50.2537 min, 3.137 s	0.11	801
1,2-Benzenedicarboxylic acid, butyl octyl ester	1.13	149.03	XIC(149.03Â±500ppm)	5887643	2918	2871	51.7539 min, 3.186 s	0.107	857
Phthalic acid, di(2-methylbutyl) ester	1.17	149.03	XIC(149.03Â±500ppm)	524499	278	578	52.4206 min, 3.054 s	0.106	772

## Sheet: Eucalyptus spp (SPE8) 
Name	Tailing.Factor	Base.Mass	Quant.Masses	Area	Peak.S.N	Quant.S.N	R.T...min.	FWHH..s.	Similarity
1-Butanol	1.13	56.08	XIC(56.08Â±500ppm)	11159092	1111	1248	3.66668 min, 1.665 s	0.085	829
Pyrazine	1.38	80.04	XIC(80.04Â±500ppm)	129670101	4647	8690	3.75002 min, 2.126 s	0.116	965
1-Butanol, 3-methyl-	0.08	43.06	XIC(43.06Â±500ppm)	3346760	565	92	3.83336 min, 1.691 s	0.105	848
Propane, 1-(1-methylethoxy)-	0.58	43.06	XIC(43.06Â±500ppm)	99271178	3461	1965	3.9167 min, 1.527 s	0.115	849
1,3,5-Hexatriene, 2-methyl-	8.37	44	XIC(44.00Â±500ppm)	2035770	474	64	3.9167 min, 1.648 s	0.093	763
3-Penten-2-one	1.28	69.04	XIC(69.04Â±500ppm)	29544972	3549	3992	3.9167 min, 1.959 s	0.104	878
Furan, 3-methyl-	1.54	53.06	XIC(53.06Â±500ppm)	18131531	1489	2009	4.08338 min, 2.091 s	0.098	832
Pyridine	2.5	79.04	XIC(79.04Â±500ppm)	36645811	1827	2492	4.08338 min, 2.122 s	0.14	905
Furan, 2,3-dihydro-4-methyl-	2.97	55.07	XIC(55.07Â±500ppm)	6128076	744	1148	4.16672 min, 2.010 s	0.094	832
Pyrrole	1.16	67.05	XIC(67.05Â±500ppm)	16253607	2755	3129	4.16672 min, 2.136 s	0.103	765
1,4-Cyclohexadiene, 1-methyl-	1.16	79.06	XIC(79.06Â±500ppm)	818418	163	142	4.25006 min, 1.707 s	0.113	741
2-Butenoic acid, methyl ester	1.4	69.04	XIC(69.04Â±500ppm)	7230872	1421	1844	4.3334 min, 1.945 s	0.1	809
Oxazolidine, 3-methyl-2-propyl-	1.15	86.04	XIC(86.04Â±500ppm)	15474574	3319	6498	4.3334 min, 2.413 s	0.121	827
1-Hydroxy-2-butanone	1.45	57.05	XIC(57.05Â±500ppm)	108437923	5681	6847	4.41674 min, 2.193 s	0.116	944
Heptane, 3-methyl-	0.8	43.07	XIC(43.07Â±500ppm)	24960541	804	826	4.41674 min, 6.487 s	0.09	898
4-Hexen-3-one	0.88	41.06	XIC(41.06Â±500ppm)	4553673	435	269	4.50008 min, 1.901 s	0.107	844
Butanoic acid	1.15	60.03	XIC(60.03Â±500ppm)	90652601	3985	3492	4.7501 min, 1.803 s	0.098	931
2-Butene-1,4-diol, (Z)-	0.51	42.06	XIC(42.06Â±500ppm)	17711379	517	314	4.7501 min, 2.148 s	0.134	805
3-Hexanone	0.71	43.07	XIC(43.07Â±500ppm)	11695591	628	506	4.83344 min, 1.930 s	0.105	832
Cyclopentanone	1.24	55.04	XIC(55.04Â±500ppm)	66278381	3936	3919	4.91678 min, 2.435 s	0.131	917
Ethanol	7.32	45.05	XIC(45.05Â±500ppm)	1652720	112	91	4.91678 min, 6.249 s	0.067	829
Cyclohexane, 1,2-dimethyl-, trans-	1.32	55.07	XIC(55.07Â±500ppm)	7308231	1056	821	5.08346 min, 1.650 s	0.146	861
Propanenitrile, 3,3'-oxybis-	1.34	84.02	XIC(84.02Â±500ppm)	99481285	1966	8110	5.08346 min, 2.835 s	0.142	754
3(2H)-Furanone, dihydro-5-methyl-	0.73	42.06	XIC(42.06Â±500ppm)	3179447	220	80	5.33348 min, 2.436 s	0.127	747
Pyridine, 2-methyl-	2.43	93.06	XIC(93.06Â±500ppm)	4778109	584	1000	5.75018 min, 2.384 s	0.16	882
Pyrazine, methyl-	1.7	94.05	XIC(94.05Â±500ppm)	104914417	6131	8245	5.83352 min, 2.532 s	0.145	923
Methyl valerate	2.28	74.04	XIC(74.04Â±500ppm)	2003156	288	315	5.91686 min, 1.989 s	0.105	729
2-Furanmethanol, tetrahydro-	1.63	71.06	XIC(71.06Â±500ppm)	44979941	2475	5741	6.0002 min, 2.619 s	0.145	854
Maleic anhydride	1.25	54.03	XIC(54.03Â±500ppm)	29456365	2926	3734	6.0002 min, 2.762 s	0.162	736
Butanoic acid, 2-hydroxy-, methyl ester	1.37	59.06	XIC(59.06Â±500ppm)	3725429	1104	1086	6.08354 min, 2.204 s	0.147	767
2-Cyclopenten-1-one	1.57	82.04	XIC(82.04Â±500ppm)	182883353	3910	8988	6.08354 min, 3.051 s	0.163	834
Cyclopentanone, 2-methyl-	0.7	55.05	XIC(55.05Â±500ppm)	9501968	204	1167	6.33356 min, 2.499 s	0.158	751
Acetone	1.32	43.04	XIC(43.04Â±500ppm)	561065761	2655	7670	6.4169 min, 2.384 s	0.213	850
3-Pentenoic acid, methyl ester	4.62	55.07	XIC(55.07Â±500ppm)	1418791	243	241	6.58358 min, 2.224 s	0.14	825
1,2-Ethanediol, monoacetate	1.25	43.03	XIC(43.03Â±500ppm)	21393636	1723	905	6.66692 min, 2.692 s	0.142	941
2-Furanmethanol	1.22	98.03	XIC(98.03Â±500ppm)	118002197	4375	8375	6.8336 min, 2.675 s	0.148	882
2-Butanone	1.12	43.04	XIC(43.04Â±500ppm)	6311190	226	214	6.91694 min, 3.269 s	0.159	742
Furan, 2-ethyl-	1.3	81.04	XIC(81.04Â±500ppm)	9865692	1054	1004	7.2503 min, 2.928 s	0.164	771
2-Propanone, 1-(acetyloxy)-	1.18	43.04	XIC(43.04Â±500ppm)	345938104	3644	5913	7.33364 min, 2.962 s	0.182	963
Cyclohexene, 3-methyl-	1.24	81.04	XIC(81.04Â±500ppm)	4377230	597	732	7.58366 min, 2.970 s	0.156	777
2H-Pyran-3(4H)-one, dihydro-	2.52	42.05	XIC(42.05Â±500ppm)	13061733	905	504	7.75034 min, 3.203 s	0.174	901
4-Cyclopentene-1,3-dione	1.13	96.02	XIC(96.02Â±500ppm)	34566656	2198	4420	7.83368 min, 3.433 s	0.145	883
o-Xylene	1.14	91.06	XIC(91.06Â±500ppm)	18513298	3841	3603	8.0837 min, 2.394 s	0.14	909
2,6-Lutidine	2.12	107.07	XIC(107.07Â±500ppm)	1045907	322	364	8.16704 min, 2.528 s	0.17	717
1-Penten-3-one, 2,4-dimethyl-	1.19	69.05	XIC(69.05Â±500ppm)	1996931	534	431	8.41706 min, 2.896 s	0.15	738
Glutaraldehyde	1.1	44.04	XIC(44.04Â±500ppm)	6965148	198	121	8.41706 min, 3.353 s	0.162	708
Ethanone, 1-(2-furanyl)-	1.3	95.01	XIC(95.01Â±500ppm)	106252266	2324	8347	8.75042 min, 3.184 s	0.159	881
1,3-Cyclopentanedione	1	42.03	XIC(42.03Â±500ppm)	3540823	568	109	8.75042 min, 3.669 s	0.143	771
Methyl acetoxyacetate	1.73	43.04	XIC(43.04Â±500ppm)	42391709	1066	1377	8.83376 min, 2.981 s	0.152	946
2-Amino-4-methyl-oxazole	1.02	42.03	XIC(42.03Â±500ppm)	3952509	309	132	8.83376 min, 3.708 s	0.16	804
Butanoic acid, 4-hydroxy-	1.33	42.06	XIC(42.06Â±500ppm)	105662891	2462	2514	8.83376 min, 4.484 s	0.168	930
Pyrazine, ethyl-	1.86	107.06	XIC(107.06Â±500ppm)	36806696	1334	3364	8.9171 min, 2.876 s	0.153	928
2(5H)-Furanone	1.19	55.03	XIC(55.02Â±500ppm)	266510793	4961	10782	8.9171 min, 4.581 s	0.195	925
2H-Tetrazole, 2,5-dimethyl-	1.27	42.05	XIC(42.05Â±500ppm)	3783386	442	80	9.08378 min, 3.669 s	0.163	722
p-Benzoquinone	0.57	54.03	XIC(54.03Â±500ppm)	4272475	400	595	9.08378 min, 3.873 s	0.152	923
2-Cyclopenten-1-one, 2-hydroxy-	1.18	98.04	XIC(98.04Â±500ppm)	9131574	3631	2030	9.25046 min, 3.352 s	0.145	910
Pyrazine, ethenyl-	1.48	106.05	XIC(106.05Â±500ppm)	4764573	1038	1187	9.50048 min, 3.159 s	0.151	877
2,5-Hexanedione	0.61	43.04	XIC(43.04Â±500ppm)	15918061	580	727	9.58382 min, 3.436 s	0.146	890
2-Cyclohexen-1-one	1.22	68.04	XIC(68.04Â±500ppm)	15888752	2734	1652	9.58382 min, 3.539 s	0.172	824
Pyridine, 2,3-dimethyl-	2.64	107.07	XIC(107.07Â±500ppm)	2371053	463	513	9.83384 min, 2.786 s	0.159	819
2-Cyclopenten-1-one, 3,4-dimethyl-	1.18	67.07	XIC(67.07Â±500ppm)	7746736	974	1164	9.91718 min, 2.949 s	0.158	848
2(5H)-Furanone, 5-methyl-	1.2	55.04	XIC(55.04Â±500ppm)	27850844	3261	2013	10.0005 min, 4.121 s	0.177	864
1,4-Cyclohexadiene, 1-ethyl-	1.01	79.06	XIC(79.06Â±500ppm)	1147464	187	162	10.2505 min, 3.059 s	0.138	759
Cyclopentanone, 3,4-bis(methylene)-	1.24	79.06	XIC(79.06Â±500ppm)	3657329	853	505	10.5839 min, 3.111 s	0.148	836
3-Pentenoic acid, 4-methyl-, methyl ester	0.98	69.04	XIC(69.04Â±500ppm)	3832643	420	832	10.8339 min, 3.240 s	0.15	754
2,3-Pentanedione	1.09	57.05	XIC(57.05Â±500ppm)	36945360	3488	5658	11.0006 min, 3.222 s	0.143	819
2-Butanone, 1-(acetyloxy)-	1.25	43.03	XIC(43.03Â±500ppm)	33625047	2570	1033	11.1673 min, 3.224 s	0.149	896
2H-Pyran-2-one	1.32	68.04	XIC(68.04Â±500ppm)	9164568	4688	1490	11.2506 min, 4.518 s	0.178	835
Methyl 2-furoate	1.17	95.01	XIC(95.01Â±500ppm)	49873169	4101	6806	11.5006 min, 3.397 s	0.151	941
4(3H)-Pyrimidinone, 3-methyl-	1.13	110.04	XIC(110.04Â±500ppm)	28868813	3496	4818	11.584 min, 4.191 s	0.166	707
4-Methyl-5H-furan-2-one	1.1	41.06	XIC(41.06Â±500ppm)	32534834	3540	1478	11.584 min, 4.409 s	0.181	823
Carbamic acid, monoammonium salt	1.3	44	XIC(44.00Â±500ppm)	3251051	123	86	11.834 min, 3.677 s	0.048	891
Pentanoic acid, 4-oxo-, methyl ester	0.97	43.04	XIC(43.04Â±500ppm)	9649769	518	334	12.084 min, 3.490 s	0.185	826
Benzofuran	1.08	118.04	XIC(118.04Â±500ppm)	15783790	874	6803	12.334 min, 3.215 s	0.14	932
2-Furanmethanol, acetate	2.61	81.04	XIC(81.04Â±500ppm)	2998873	780	551	12.4174 min, 3.145 s	0.139	881
Pyridine, 3-methoxy-	2.98	109.05	XIC(109.05Â±500ppm)	5430118	983	919	12.5841 min, 3.617 s	0.174	845
2-Furanone, 2,5-dihydro-3,5-dimethyl	1.27	69.04	XIC(69.04Â±500ppm)	22158132	1724	2264	12.6674 min, 3.903 s	0.172	850
1H-Pyrrole-2-carboxaldehyde, 1-methyl-	0.69	109.05	XIC(109.05Â±500ppm)	2365919	274	527	12.7507 min, 3.812 s	0.183	801
Propanoic acid, 2-methyl-, anhydride	1.33	71.06	XIC(71.06Â±500ppm)	31534225	916	3760	12.9174 min, 3.455 s	0.17	815
Benzene, 1-methoxy-2-methyl-	1.1	122.07	XIC(122.07Â±500ppm)	2189538	440	1001	13.0008 min, 2.956 s	0.138	898
Benzene, 1,3-dichloro-	1.1	145.97	XIC(145.97Â±500ppm)	10785388	2067	9018	13.0008 min, 3.022 s	0.121	949
3,4,5,6-Tetrahydrophthalic anhydride	1.22	79.06	XIC(79.06Â±500ppm)	1386921	196	234	13.0841 min, 3.836 s	0.15	775
3-Ethenyl-3-methylcyclopentanone	1.08	68.04	XIC(68.04Â±500ppm)	3952024	632	554	13.2508 min, 3.803 s	0.196	717
Benzene, 1-methoxy-3-methyl-	1.09	122.07	XIC(122.07Â±500ppm)	13325688	1575	5370	13.4175 min, 3.029 s	0.133	926
3(2H)-Pyridazinone, 6-methyl-	1.14	110.04	XIC(110.04Â±500ppm)	3450767	469	1230	13.4175 min, 4.041 s	0.146	709
2-Cyclopenten-1-one, 3,4,5-trimethyl-	1.08	81.08	XIC(81.08Â±500ppm)	810693	164	199	13.6675 min, 3.062 s	0.137	782
1,2-Cyclopentanedione, 3-methyl-	1.13	112.05	XIC(112.05Â±500ppm)	24392563	1779	3522	13.6675 min, 3.584 s	0.14	896
1,4-Cyclohex-2-enedione	1.11	54.04	XIC(54.04Â±500ppm)	3890202	1050	772	13.8342 min, 4.046 s	0.153	836
Benzyl alcohol	1.22	79.06	XIC(79.06Â±500ppm)	7397208	761	687	14.0842 min, 3.610 s	0.187	857
4-Oxohex-2-enal	1.19	83.04	XIC(83.04Â±500ppm)	3636492	1385	966	14.2509 min, 4.249 s	0.166	860
1H-Indene, 1-chloro-2,3-dihydro-	1.09	115.06	XIC(115.06Â±500ppm)	13949206	2058	3675	14.4175 min, 3.301 s	0.14	927
Benzaldehyde, 2-hydroxy-	1.1	122.04	XIC(122.04Â±500ppm)	4790184	814	1520	14.4175 min, 3.653 s	0.148	936
2-Cyclopenten-1-one, 3-ethyl-2-hydroxy-	2.15	43.05	XIC(43.05Â±500ppm)	1784002	242	114	15.0009 min, 3.254 s	0.135	745
2H-Pyran-2-one, tetrahydro-	1.17	42.03	XIC(42.03Â±500ppm)	4202605	208	164	15.0009 min, 5.194 s	0.195	832
(1R,5R)-2-Methyl-5-((R)-6-methylhept-5-en-2-yl)bicyclo[3.1.0]hex-2-ene	1.18	93.07	XIC(93.07Â±500ppm)	416054	164	170	15.2509 min, 2.377 s	0.109	728
Acetic acid, phenyl ester	1.04	94.04	XIC(94.04Â±500ppm)	1264931	287	278	15.3343 min, 3.423 s	0.133	769
2,3,5-Trimethylcyclopent-2-enone	1.29	109.07	XIC(109.07Â±500ppm)	2684449	1506	817	15.4176 min, 3.250 s	0.161	819
Benzaldehyde, 2-methyl-	1.25	91.06	XIC(91.06Â±500ppm)	9169197	1765	950	15.5843 min, 3.620 s	0.146	897
2,3-Dimethyl-4-hydroxy-2-butenoic lactone	1.22	55.07	XIC(55.07Â±500ppm)	3081421	650	421	15.8343 min, 4.351 s	0.168	761
2-Cyclopenten-1-one, 3-ethyl-	1.62	81.04	XIC(81.04Â±500ppm)	4367474	945	780	15.9177 min, 3.846 s	0.156	833
Phenol, 3-methyl-	1.18	107.05	XIC(107.05Â±500ppm)	75736766	3559	4789	16.0843 min, 3.217 s	0.127	931
Benzofuran, 2,3-dihydro-	1.03	91.06	XIC(91.06Â±500ppm)	6407788	472	763	16.0843 min, 3.756 s	0.145	789
2-Norcaranone, 3-methyl-	1.17	124.05	XIC(124.05Â±500ppm)	3447858	968	1407	16.251 min, 4.150 s	0.161	725
Benzene, 1-methyl-3-(1-methylethenyl)-	1.03	117.07	XIC(117.07Â±500ppm)	385565	178	179	16.5844 min, 2.840 s	0.12	858
Phenol, 2-methoxy-	1.14	109.03	XIC(109.03Â±500ppm)	125240422	3414	5805	16.5844 min, 3.607 s	0.144	905
2,5-Pyrrolidinedione, 1-methyl-	1.45	113.05	XIC(113.05Â±500ppm)	5754490	806	1674	16.6677 min, 5.392 s	0.201	827
Cyclopropyl carbinol	1.26	44.04	XIC(44.04Â±500ppm)	20204666	775	287	16.7511 min, 5.162 s	0.201	773
Benzoic acid, methyl ester	1.11	105.03	XIC(105.03Â±500ppm)	2772008	851	744	16.8344 min, 3.471 s	0.142	925
4-Hepten-3-one, 4-methyl-	1.24	97.04	XIC(97.04Â±500ppm)	3934136	893	1237	16.9177 min, 3.880 s	0.154	813
Benzofuran, 2-methyl-	1.04	131.05	XIC(131.05Â±500ppm)	7303090	754	2767	17.0011 min, 3.313 s	0.136	905
2-Ethyl-3-methylcyclopent-2-en-1-one	3.07	81.07	XIC(81.07Â±500ppm)	1406891	377	314	17.2511 min, 3.452 s	0.162	783
Phenol, 2,3-dimethyl-	1.16	122.07	XIC(122.07Â±500ppm)	5010055	687	1022	17.4178 min, 3.395 s	0.137	747
2,5-Dimethylanisole	1.57	136.09	XIC(136.09Â±500ppm)	4761087	1152	1992	17.5845 min, 2.961 s	0.136	889
Pentane, 1-propoxy-	1.21	43.04	XIC(43.04Â±500ppm)	20295915	1836	785	17.5845 min, 4.068 s	0.17	727
Benzene, 1-ethyl-4-methoxy-	1.01	121.07	XIC(121.07Â±500ppm)	1701858	391	462	17.7511 min, 3.099 s	0.12	717
Levoglucosenone	1.09	98.04	XIC(98.04Â±500ppm)	1276621	676	515	17.7511 min, 4.750 s	0.177	897
Cyclopentane, 1,3-dimethyl-, cis-	0.78	41.06	XIC(41.06Â±500ppm)	549601	270	51	18.0012 min, 1.889 s	0.172	775
3,5-Dimethylanisole	1.18	136.09	XIC(136.09Â±500ppm)	2089666	389	862	18.0012 min, 3.068 s	0.134	837
Hexanoic acid, 2-ethyl-	1.27	73.04	XIC(73.04Â±500ppm)	316766	197	129	18.1678 min, 2.280 s	0.099	727
2(3H)-Furanone, 5-acetyldihydro-	1.11	85.03	XIC(85.03Â±500ppm)	4080895	1123	1221	18.5012 min, 5.376 s	0.191	878
Ethanone, 1-(2-methylphenyl)-	1.97	91.06	XIC(91.06Â±500ppm)	700162	335	118	18.8346 min, 3.600 s	0.148	759
Benzyl nitrile	1.3	117.06	XIC(117.06Â±500ppm)	1388382	469	519	18.9179 min, 4.436 s	0.157	908
Phenol, 2-ethyl-	1.12	107.05	XIC(107.05Â±500ppm)	3966692	1144	1250	19.0012 min, 3.224 s	0.125	910
Pentanedioic acid, dimethyl ester	1.15	59.05	XIC(59.05Â±500ppm)	444124	239	194	19.0012 min, 3.288 s	0.122	769
Pyrrolidine, 1-methyl-	0.61	84.05	XIC(84.05Â±500ppm)	1910386	558	585	19.0846 min, 3.848 s	0.166	726
Benzene, 1-methyl-2-(2-propenyl)-	1.07	117.07	XIC(117.07Â±500ppm)	1796968	569	799	19.3346 min, 3.146 s	0.132	833
1H-Indene, 1-methyl-	0.95	130.08	XIC(130.08Â±500ppm)	5472491	776	2416	19.3346 min, 3.314 s	0.124	926
Benzene, 1,2-dimethoxy-	1.41	138.07	XIC(138.07Â±500ppm)	3030979	907	1245	19.4179 min, 3.778 s	0.155	867
Phenol, 2,6-dimethyl-	1.13	107.05	XIC(107.05Â±500ppm)	18379872	1263	2546	19.5013 min, 3.254 s	0.122	914
Acetic acid, 2-ethylhexyl ester	1.24	43.04	XIC(43.04Â±500ppm)	3317932	426	158	19.5846 min, 2.303 s	0.115	889
1H-Indene, 3-methyl-	1.14	130.08	XIC(130.08Â±500ppm)	3982773	1507	2025	19.5846 min, 3.354 s	0.174	905
1,4-Dioxaspiro[2.4]heptan-5-one, 7-methyl-	1.1	42.06	XIC(42.06Â±500ppm)	12241838	595	440	19.5846 min, 5.627 s	0.208	710
Benzaldehyde, 2-hydroxy-4-methyl-	1.16	136.05	XIC(136.05Â±500ppm)	1069448	269	531	19.668 min, 3.632 s	0.131	820
Benzene, 1,3-dimethoxy-	1.09	138.07	XIC(138.07Â±500ppm)	1287241	477	1043	20.2513 min, 3.686 s	0.135	852
Ethanone, 1-(4-methylphenyl)-	1.26	119.05	XIC(119.05Â±500ppm)	1715243	382	608	20.5014 min, 3.682 s	0.137	915
Naphthalene, 1,2-dihydro-4-methyl-	0.93	129.07	XIC(129.07Â±500ppm)	453488	227	280	20.7514 min, 3.144 s	0.132	816
Phenol, 3,5-dimethyl-	1.14	107.05	XIC(107.05Â±500ppm)	3073498	514	938	20.8347 min, 3.419 s	0.129	864
Creosol	1.1	123.05	XIC(123.05Â±500ppm)	5444518	702	1960	20.8347 min, 3.457 s	0.127	778
Ethyl-2-benzofuran	1.03	131.05	XIC(131.05Â±500ppm)	1140059	408	535	20.9181 min, 3.317 s	0.131	819
2-Methoxy-5-methylphenol	1.04	123.05	XIC(123.05Â±500ppm)	1508147	249	608	21.1681 min, 3.501 s	0.12	889
1-Octanol	1.04	55.06	XIC(55.06Â±500ppm)	1369560	129	198	21.4181 min, 5.439 s	0.199	742
Phenol, 3,4-dimethyl-	1.21	107.05	XIC(107.05Â±500ppm)	4803328	688	895	21.5014 min, 3.441 s	0.133	746
cis-3-Decene	1.01	55.07	XIC(55.07Â±500ppm)	3136826	288	373	21.7515 min, 2.165 s	0.093	903
Benzofuran, 4,7-dimethyl-	1.08	146.08	XIC(146.08Â±500ppm)	2559041	1050	2414	21.8348 min, 3.301 s	0.126	840
Phenol, 2,4,6-trimethyl-	1.17	121.07	XIC(121.07Â±500ppm)	1672543	329	652	21.9181 min, 3.367 s	0.128	851
Tricyclo[4.2.1.1(2,5)]deca-3,7-diene-9,10-dione, (1a,2ÃŸ,5ÃŸ,6a)-	1.09	131.05	XIC(131.05Â±500ppm)	4700550	1994	1363	22.5849 min, 4.590 s	0.164	862
2,3-Anhydro-d-galactosan	0.27	43.04	XIC(43.04Â±500ppm)	734930	201	52	22.5849 min, 4.976 s	0.172	818
1H-Indazole, 5,7-dimethyl-	0.98	131.05	XIC(131.05Â±500ppm)	1093842	385	462	22.6682 min, 3.379 s	0.12	788
2,3-Anhydro-d-mannosan	1.08	71.02	XIC(71.02Â±500ppm)	1008587	232	458	22.9182 min, 4.849 s	0.164	818
Phenol, 2-(1-methylethyl)-	1.12	121.07	XIC(121.07Â±500ppm)	1911027	406	602	23.1682 min, 3.212 s	0.117	885
Benzofuran, 2-ethenyl-	0.99	144.06	XIC(144.06Â±500ppm)	746182	358	682	23.1682 min, 3.591 s	0.125	777
m-Guaiacol	1.16	124.05	XIC(124.05Â±500ppm)	614057	200	292	23.1682 min, 3.825 s	0.125	781
Furan, 2-butyltetrahydro-	1.26	71.06	XIC(71.06Â±500ppm)	4057900	614	864	23.1682 min, 3.970 s	0.155	760
1H-Benzimidazole, 5,6-dimethyl-	0.93	131.05	XIC(131.05Â±500ppm)	444447	161	199	23.4183 min, 3.459 s	0.14	774
5-(Hydroxymethyl)dihydrofuran-2(3H)-one	1.16	85.03	XIC(85.03Â±500ppm)	2334040	696	839	23.5016 min, 5.166 s	0.178	775
Phenol, 2-ethyl-5-methyl-	1.13	121.07	XIC(121.07Â±500ppm)	4209620	1416	1312	23.5849 min, 3.277 s	0.115	873
1-Dodecanol	0.5	69.08	XIC(69.08Â±500ppm)	335571	111	119	23.6683 min, 2.074 s	0.079	841
3,4-Dimethoxytoluene	1.39	152.09	XIC(152.09Â±500ppm)	5114207	1433	1643	23.6683 min, 3.577 s	0.137	905
Phenol, 2-ethyl-4-methyl-	1.13	121.07	XIC(121.07Â±500ppm)	1754844	309	505	23.835 min, 3.240 s	0.111	810
2,5-Diethylphenol	2.28	135.05	XIC(135.05Â±500ppm)	912513	335	280	24.0016 min, 3.483 s	0.124	720
2(3H)-Benzofuranone, 3-methyl-	1.04	120.06	XIC(120.06Â±500ppm)	511154	177	243	24.0016 min, 4.205 s	0.134	898
Phenol, 4-propyl-	1.16	107.05	XIC(107.05Â±500ppm)	1641032	841	685	24.5017 min, 3.229 s	0.113	884
1H-1,2,4-Triazol-5-amine, 1-methyl-	1.54	43.04	XIC(43.04Â±500ppm)	2164443	387	151	24.5017 min, 3.591 s	0.161	728
Phenol, 2-ethyl-6-methyl-	1.98	121.07	XIC(121.07Â±500ppm)	2749060	566	1136	24.585 min, 3.262 s	0.118	847
Phenol, 4-ethyl-2-methoxy-	0.59	137.06	XIC(137.06Â±500ppm)	617439	163	416	24.585 min, 3.420 s	0.119	775
Benzofuran, 5-methoxy-	1.13	148.05	XIC(148.05Â±500ppm)	1214165	316	964	24.585 min, 4.051 s	0.142	809
2-Methyl-5-hydroxybenzofuran	1.11	148.06	XIC(148.06Â±500ppm)	461068	222	391	24.7517 min, 3.772 s	0.117	785
1,3-Dioxolane, 2-hexyl-	1.53	73.04	XIC(73.04Â±500ppm)	958232	114	476	24.7517 min, 6.140 s	0.048	743
3,5-Dimethoxytoluene	1.18	152.09	XIC(152.09Â±500ppm)	4486612	1173	1745	24.835 min, 3.518 s	0.127	889
1H-Inden-1-one, 2,3-dihydro-	1.27	104.06	XIC(104.06Â±500ppm)	5290400	853	1045	25.2517 min, 4.667 s	0.164	898
1H-Inden-1-one, 2,3-dihydro-3-methyl-	1.15	131.05	XIC(131.05Â±500ppm)	1169353	860	377	25.6684 min, 4.240 s	0.162	820
Ehtyl 2-piperonyl carbazate	1.06	135.08	XIC(135.08Â±500ppm)	431248	126	155	26.0018 min, 3.299 s	0.117	731
3-Undecene, (Z)-	0.9	55.07	XIC(55.07Â±500ppm)	1171817	201	203	26.2518 min, 2.157 s	0.08	909
Ethanone, 1-[4-(1-methylethenyl)phenyl]-	1.12	145.07	XIC(145.07Â±500ppm)	1184401	553	879	26.2518 min, 3.239 s	0.135	807
1-Nonene, 4,6,8-trimethyl-	0.4	71.09	XIC(71.09Â±500ppm)	266948	105	139	26.5018 min, 2.025 s	0.1	780
Naphthalene, 1-methyl-	1.06	142.08	XIC(142.08Â±500ppm)	16201662	2309	6080	26.5852 min, 3.898 s	0.134	924
Naphthalene, 1,2-dihydro-7-methoxy-	1.16	145.07	XIC(145.07Â±500ppm)	3666248	910	1518	26.7519 min, 3.249 s	0.115	763
Cyclopropane, 1-pentyl-2-propyl-	1.03	55.07	XIC(55.07Â±500ppm)	881595	120	151	26.9185 min, 2.194 s	0.076	912
1-Methylindan-2-one	1.36	131.05	XIC(131.05Â±500ppm)	647923	270	259	26.9185 min, 4.289 s	0.196	845
1,2,3-Trimethoxybenzene	1.34	168.08	XIC(168.08Â±500ppm)	715902	272	584	27.0019 min, 3.881 s	0.145	815
3-Methoxy-5-methylphenol	1.13	138.07	XIC(138.07Â±500ppm)	914056	180	478	27.3352 min, 3.751 s	0.114	857
Benzene, 4-ethyl-1,2-dimethoxy-	1.34	151.08	XIC(151.08Â±500ppm)	873607	597	551	27.4186 min, 3.450 s	0.123	817
2,5,6-Trimethylbenzimidazole	0.96	160.09	XIC(160.09Â±500ppm)	540706	282	684	27.5019 min, 3.286 s	0.121	752
1-Naphthalenol	1.19	115.06	XIC(115.06Â±500ppm)	376244	181	122	27.5019 min, 4.308 s	0.156	809
Octane, 2,4,6-trimethyl-	1.63	57.09	XIC(57.09Â±500ppm)	430777	151	126	28.0853 min, 1.850 s	0.086	777
7-Methylindan-1-one	1.37	146.08	XIC(146.08Â±500ppm)	754571	248	514	28.3353 min, 4.304 s	0.152	815
Phenol, 3-methoxy-2,4,5-trimethyl-	2.17	166.1	XIC(166.10Â±500ppm)	2767449	324	1603	28.5853 min, 3.266 s	0.132	797
Phenol, 2,6-dimethoxy-	1.1	154.07	XIC(154.07Â±500ppm)	33483722	1674	4048	28.5853 min, 4.213 s	0.139	888
Phenol, 2-methoxy-3-(2-propenyl)-	1.14	164.09	XIC(164.09Â±500ppm)	4215136	1430	2172	28.8354 min, 3.445 s	0.119	920
p-Cymene-2,5-diol	1.1	151.08	XIC(151.08Â±500ppm)	908023	460	395	29.002 min, 3.221 s	0.113	757
6-Methoxy-3-methylbenzofuran	1.09	162.07	XIC(162.07Â±500ppm)	1698088	490	1252	29.002 min, 3.818 s	0.129	792
Phenol, 2-methoxy-4-propyl-	1.12	137.06	XIC(137.06Â±500ppm)	6316230	2166	2070	29.2521 min, 3.259 s	0.112	891
Benzeneethanamine, 4-methoxy-N-[2-(4-methoxyphenyl)ethyl]-	1.08	164.09	XIC(164.09Â±500ppm)	346813	208	321	29.8354 min, 3.597 s	0.11	725
Naphthalene, 2-ethyl-	1.09	141.07	XIC(141.07Â±500ppm)	1678826	648	1112	30.1688 min, 3.616 s	0.115	872
1,1'-Biphenyl, 2-methyl-	1.21	168.1	XIC(168.10Â±500ppm)	264241	153	303	30.5022 min, 3.553 s	0.109	850
Vanillin	1.14	151.04	XIC(151.04Â±500ppm)	5755204	4360	1863	30.5022 min, 4.566 s	0.149	933
Naphthalene, 1,7-dimethyl-	1.06	156.1	XIC(156.10Â±500ppm)	2447167	898	2115	30.5855 min, 3.613 s	0.121	901
Acenaphthylene	1.11	152.07	XIC(152.07Â±500ppm)	851718	261	349	30.5855 min, 4.049 s	0.134	852
Benzimidazole, 4,5,6,7-tetramethyl-	1.05	159.09	XIC(159.09Â±500ppm)	266323	235	236	30.7522 min, 3.129 s	0.109	712
Benzene, 1,2,3-trimethoxy-5-methyl-	1.31	167.08	XIC(167.08Â±500ppm)	1971237	447	1019	30.9189 min, 3.641 s	0.13	856
Ethanone, 1-(2,3-dihydro-1H-inden-5-yl)-	1.17	145.07	XIC(145.07Â±500ppm)	334001	154	200	31.2522 min, 4.207 s	0.136	739
1H-Isoindole-1,3(2H)-dione, 2-methyl-	1.5	161.05	XIC(161.05Â±500ppm)	411642	261	272	31.4189 min, 4.781 s	0.154	902
Naphthalene, 2,6-dimethyl-	1.07	156.1	XIC(156.10Â±500ppm)	429419	197	467	32.169 min, 3.877 s	0.12	884
3,5-Dimethoxy-4-hydroxytoluene	1.1	168.09	XIC(168.09Â±500ppm)	11154017	1827	3531	32.5857 min, 3.937 s	0.131	797
Benzene, ethylpentamethyl-	1.03	161.06	XIC(161.06Â±500ppm)	529299	265	492	32.669 min, 3.684 s	0.12	738
5-Ethyldecane	1.34	57.09	XIC(57.09Â±500ppm)	320136	107	105	32.7523 min, 1.846 s	0.069	841
Furan, 2,2'-methylenebis[5-methyl-	1.13	176.09	XIC(176.09Â±500ppm)	546466	333	503	33.4191 min, 3.731 s	0.124	724
Azetidine, 1,1'-methylenebis[2-methyl-	1.11	84.05	XIC(84.05Â±500ppm)	795143	437	479	33.5024 min, 2.643 s	0.084	772
Acenaphthene	1.02	153.07	XIC(153.07Â±500ppm)	737374	329	435	33.8358 min, 4.243 s	0.134	921
1,1'-Biphenyl, 4-methyl-	1.1	168.1	XIC(168.10Â±500ppm)	1012076	425	985	34.0024 min, 3.655 s	0.115	912
Ethanone, 1-(3-hydroxy-4-methoxyphenyl)-	1.16	151.04	XIC(151.04Â±500ppm)	1871081	462	871	34.0858 min, 4.425 s	0.137	869
1-Naphthalenecarbonitrile	1.64	153.06	XIC(153.06Â±500ppm)	1699090	877	612	34.2525 min, 4.773 s	0.165	921
Naphthalene, 2-(1-methylethyl)-	1.04	155.09	XIC(155.09Â±500ppm)	369536	253	324	34.6692 min, 3.477 s	0.112	833
2-Naphthalenecarbonitrile	1.56	153.06	XIC(153.06Â±500ppm)	960272	424	435	35.3359 min, 4.801 s	0.165	898
Homovanillyl alcohol	1.07	137.06	XIC(137.06Â±500ppm)	3603281	984	1826	35.9193 min, 4.290 s	0.136	783
Naphthalene, 1,6,7-trimethyl-	1.04	170.11	XIC(170.11Â±500ppm)	361083	190	314	36.336 min, 3.651 s	0.131	874
4-Nitroguaiacol	1.26	169.04	XIC(169.03Â±500ppm)	311651	137	191	36.336 min, 4.578 s	0.147	822
n-Nonylcyclohexane	0.86	83.09	XIC(83.09Â±500ppm)	217272	118	111	36.6693 min, 2.113 s	0.069	853
1H-Phenalene	1.13	165.08	XIC(165.08Â±500ppm)	639125	291	405	36.9193 min, 4.219 s	0.129	859
2,6-Dimethoxybenzoquinone	1.49	69.02	XIC(69.02Â±500ppm)	592276	165	177	37.2527 min, 5.840 s	0.165	754
Fluorene	1.16	166.08	XIC(166.08Â±500ppm)	3137748	588	1693	37.6694 min, 4.234 s	0.131	919
9H-Fluorene, 9-methyl-	1.14	165.08	XIC(165.08Â±500ppm)	382214	159	319	38.5028 min, 4.014 s	0.121	835
Phenol, 2,6-dimethoxy-4-(2-propenyl)-	1.06	194.1	XIC(194.10Â±500ppm)	1324165	749	1097	38.7528 min, 3.763 s	0.123	907
Homosyringaldehyde	1.37	44	XIC(44.00Â±500ppm)	1952358	1003	51	39.0028 min, 3.559 s	0.117	735
Dibenzofuran, 4-methyl-	1.07	182.08	XIC(182.08Â±500ppm)	649995	259	709	39.1695 min, 3.949 s	0.115	861
6H-Dibenzo[b,d]-pyran	1.02	182.08	XIC(182.08Â±500ppm)	1323020	453	1032	39.5862 min, 3.963 s	0.126	866
Benzaldehyde, 4-hydroxy-3,5-dimethoxy-	1.12	182.06	XIC(182.06Â±500ppm)	1428575	626	768	40.8363 min, 4.758 s	0.151	870
9H-Fluorene, 4-methyl-	1.28	165.08	XIC(165.08Â±500ppm)	304103	132	228	42.1698 min, 4.141 s	0.123	874
9H-Fluoren-9-one	1.31	180.06	XIC(180.05Â±500ppm)	535772	180	370	43.2532 min, 4.865 s	0.148	923
1-Dodecanol, 3,7,11-trimethyl-	1	56.08	XIC(56.08Â±500ppm)	1309461	329	310	43.4199 min, 1.865 s	0.061	868
Decane, 5-propyl-	1.43	57.09	XIC(57.09Â±500ppm)	611061	116	149	43.8366 min, 1.842 s	0.069	871
Phenanthrene	1.17	178.08	XIC(178.08Â±500ppm)	8295910	2980	3355	44.67 min, 4.772 s	0.151	939
Hexadecane, 2,6,10,14-tetramethyl-	1.88	57.09	XIC(57.09Â±500ppm)	530050	281	186	46.0867 min, 1.809 s	0.077	905
1,2-Benzenedicarboxylic acid, butyl 2-ethylhexyl ester	1.11	149.03	XIC(149.03Â±500ppm)	14553026	5438	4309	49.587 min, 3.284 s	0.109	911
3-methoxy-4-hydroxy-methyl-nitrostyrene	2.49	41.04	XIC(41.04Â±500ppm)	780981	350	73	49.6704 min, 4.416 s	0.149	848
1,2-Benzenedicarboxylic acid, butyl octyl ester	1.14	149.03	XIC(149.03Â±500ppm)	4092278	1343	2068	50.2537 min, 3.140 s	0.108	802
Dibutyl phthalate	1.13	149.03	XIC(149.03Â±500ppm)	10599453	3607	3864	51.0871 min, 3.333 s	0.108	950
Phthalic acid, di(2-methylbutyl) ester	1.13	149.03	XIC(149.03Â±500ppm)	519674	299	436	52.4206 min, 3.053 s	0.109	750

## Sheet: Charcoal (SPE9) 
Name	Tailing.Factor	Base.Mass	Quant.Masses	Area	Peak.S.N	Quant.S.N	R.T...min.	FWHH..s.	Similarity
Acetamide, N,N'-ethylenebis(N-nitro-	0.1	43.03	XIC(43.03Â±500ppm)	30083613	443	662	3.75002 min, 1.609 s	0.149	843
Pyrazine	1.37	80.04	XIC(80.04Â±500ppm)	74431764	3977	6643	3.75002 min, 2.128 s	0.112	952
1-Butanol, 3-methyl-	2.84	55.07	XIC(55.07Â±500ppm)	5038137	409	803	3.83336 min, 1.690 s	0.108	843
Propane, 1-(1-methylethoxy)-	1.47	43.06	XIC(43.06Â±500ppm)	75170340	1730	1481	3.9167 min, 1.514 s	0.101	807
1-Methylcyclohexa-1,3-diene	1.21	79.06	XIC(79.06Â±500ppm)	10174626	2007	1303	3.9167 min, 1.647 s	0.093	884
1-[(1-Oxo-2-propenyl)oxy]-2,5-pyrrolidinedione	0.44	55.07	XIC(55.07Â±500ppm)	9030953	384	1020	3.9167 min, 1.937 s	0.095	743
3-Penten-2-one, (E)-	1.3	69.04	XIC(69.04Â±500ppm)	99539381	2573	7790	3.9167 min, 1.959 s	0.103	884
Pyridine	2.72	79.04	XIC(79.03Â±500ppm)	210713068	4356	6828	4.00004 min, 2.124 s	0.14	937
Furan, 2-methyl-	1.83	53.06	XIC(53.06Â±500ppm)	11048539	1853	1125	4.08338 min, 2.093 s	0.104	831
2-Pentenal, (E)-	2.13	55.07	XIC(55.07Â±500ppm)	6642401	592	1314	4.16672 min, 2.012 s	0.091	836
2-Butenoic acid, methyl ester	1.26	69.04	XIC(69.04Â±500ppm)	18279844	3274	3664	4.3334 min, 1.945 s	0.101	841
(CH3)2C=CHCN	0.14	41.06	XIC(41.06Â±500ppm)	4985000	278	270	4.3334 min, 2.278 s	0.108	848
Oxazolidine, 2-ethyl-3-methyl-	1.18	86.04	XIC(86.04Â±500ppm)	5319234	1520	2345	4.3334 min, 2.413 s	0.119	821
1-Hydroxy-2-butanone	1.41	57.05	XIC(57.05Â±500ppm)	41522137	3000	2894	4.41674 min, 2.190 s	0.106	923
4-Hexen-3-one	0.93	41.06	XIC(41.06Â±500ppm)	10333901	579	563	4.50008 min, 1.901 s	0.109	856
3-Pentenenitrile	1.24	41.05	XIC(41.05Â±500ppm)	4292615	405	177	4.58342 min, 2.217 s	0.108	744
2(5H)-Furanone	1.21	55.04	XIC(55.04Â±500ppm)	1983792	783	215	4.58342 min, 2.569 s	0.121	805
Ethanol	7.37	45.05	XIC(45.05Â±500ppm)	3203982	109	143	4.58342 min, 6.251 s	0.068	848
Cyclohexane, 1,4-dimethyl-	1.32	55.07	XIC(55.07Â±500ppm)	48988801	2666	5219	4.66676 min, 1.582 s	0.126	883
Methyl isovalerate	1.28	74.04	XIC(74.04Â±500ppm)	9601884	1114	1764	4.66676 min, 1.793 s	0.119	744
Butanoic acid	1.16	60.03	XIC(60.03Â±500ppm)	110545107	3713	3977	4.7501 min, 1.805 s	0.098	927
2-Furanol, tetrahydro-	1.34	42.06	XIC(42.06Â±500ppm)	32745273	846	562	4.7501 min, 2.151 s	0.132	822
3-Hexanone	0.62	43.07	XIC(43.07Â±500ppm)	34643136	1343	1339	4.83344 min, 1.925 s	0.103	936
Furan, 2,3-dihydro-4-methyl-	1.17	84.06	XIC(84.06Â±500ppm)	4900673	742	1243	4.83344 min, 2.231 s	0.113	835
Cyclopentanone	1.27	55.04	XIC(55.04Â±500ppm)	208442659	24162	9516	4.91678 min, 2.438 s	0.155	920
Propanoic acid, 2-oxo-, methyl ester	0.99	43.03	XIC(43.03Â±500ppm)	49276227	1343	1075	4.91678 min, 2.576 s	0.121	864
Propanenitrile, 3,3'-oxybis-	1.32	84.02	XIC(84.02Â±500ppm)	78963583	2574	6421	5.08346 min, 2.837 s	0.131	758
Thiocyanic acid, ethyl ester	1.93	59.01	XIC(59.01Â±500ppm)	1127367	221	350	5.33348 min, 2.476 s	0.11	722
4-Pentenoic acid, methyl ester	1.68	55.07	XIC(55.07Â±500ppm)	9984322	691	807	5.50016 min, 2.034 s	0.122	829
2-Pentenoic acid, methyl ester, (E)-	1.7	83.05	XIC(83.05Â±500ppm)	1402834	533	437	5.75018 min, 2.055 s	0.126	842
Pyridine, 2-methyl-	2.8	93.06	XIC(93.06Â±500ppm)	117085377	2568	4737	5.75018 min, 2.362 s	0.157	933
Pyrazine, methyl-	1.7	94.05	XIC(94.05Â±500ppm)	41519820	5841	3926	5.83352 min, 2.534 s	0.142	950
Methyl valerate	1.3	74.04	XIC(74.04Â±500ppm)	18257303	2215	2346	5.91686 min, 1.988 s	0.109	834
4-Penten-2-one, 3-methyl-	0.73	43.04	XIC(43.04Â±500ppm)	11162901	150	409	5.91686 min, 2.020 s	0.187	758
2-Furanol, tetrahydro-2-methyl-	1.77	71.06	XIC(71.06Â±500ppm)	21235485	2261	3139	6.0002 min, 2.621 s	0.144	850
2-Hydroxy-2,5-dimethyl-hept-6-en-3-one	1.33	59.06	XIC(59.06Â±500ppm)	4064684	893	1250	6.08354 min, 2.204 s	0.143	724
2-Cyclopenten-1-one	1.62	82.04	XIC(82.04Â±500ppm)	344806483	17613	16646	6.08354 min, 3.042 s	0.191	841
3-Hexanone, 5-methyl-	1.27	57.07	XIC(57.07Â±500ppm)	2164544	547	490	6.16688 min, 2.014 s	0.133	730
2,3-Hexanedione	0.75	43.07	XIC(43.07Â±500ppm)	6133973	150	314	6.25022 min, 2.022 s	0.148	836
Furan, 2-methoxy-	2.67	55.07	XIC(55.07Â±500ppm)	15939973	747	2608	6.33356 min, 2.352 s	0.207	781
1,4-Cyclohexadiene, 1,2-dimethyl-	1.08	93.07	XIC(93.07Â±500ppm)	4911251	775	1070	6.4169 min, 1.924 s	0.109	839
3-Pentenoic acid, methyl ester	4.98	55.07	XIC(55.07Â±500ppm)	6486137	996	994	6.4169 min, 2.212 s	0.109	791
Cyclopentanone, 3-methyl-	1.24	69.05	XIC(69.05Â±500ppm)	19677783	1872	2211	6.50024 min, 2.594 s	0.154	871
Butanoic acid, 2-methyl-	1.42	74.04	XIC(74.04Â±500ppm)	3764553	1087	614	6.66692 min, 1.931 s	0.121	832
1,2-Ethanediol, monoacetate	1.26	43.04	XIC(43.04Â±500ppm)	20492260	1389	781	6.66692 min, 2.693 s	0.142	969
2-Furanmethanol	1.24	98.03	XIC(98.03Â±500ppm)	80484300	2942	6523	6.8336 min, 2.669 s	0.131	882
1,3-Cyclohexadiene, 5,6-dimethyl-	1.28	93.07	XIC(93.07Â±500ppm)	974946	298	377	6.91694 min, 2.008 s	0.127	772
2-Hexanone, 5-methyl-	0.65	43.04	XIC(43.04Â±500ppm)	8417558	234	333	6.91694 min, 2.145 s	0.147	765
Pyridine, 3-methyl-	3.17	93.06	XIC(93.06Â±500ppm)	63750315	1704	2470	7.08362 min, 2.702 s	0.165	886
2-Methylcyclopropane-1-carboxylic acid methyl ester	1.13	83.05	XIC(83.05Â±500ppm)	8632180	1084	1510	7.2503 min, 2.343 s	0.119	834
Methylenecyclopropanecarboxylic acid	1.18	98.04	XIC(98.04Â±500ppm)	1123522	300	206	7.2503 min, 2.567 s	0.115	790
Cyclohexene, 3-methyl-	1.29	81.04	XIC(81.04Â±500ppm)	29313891	2366	2720	7.2503 min, 2.930 s	0.163	806
2-Propanone, 1-(acetyloxy)-	1.14	43.03	XIC(43.03Â±500ppm)	149114460	4220	4416	7.33364 min, 2.961 s	0.164	972
5-Hepten-2-one	0.26	43.03	XIC(43.03Â±500ppm)	6196532	206	322	7.41698 min, 2.299 s	0.138	713
1,4-Hexadiene, 2-methyl-	1.24	81.04	XIC(81.04Â±500ppm)	19263802	989	2166	7.58366 min, 2.970 s	0.156	824
4-Cyclopentene-1,3-dione	1.14	96.02	XIC(96.02Â±500ppm)	8852325	1640	1136	7.58366 min, 3.953 s	0.167	934
Pentanoic acid	1.23	60.04	XIC(60.04Â±500ppm)	9567808	1539	1201	7.75034 min, 2.066 s	0.105	908
2H-Pyran-3(4H)-one, dihydro-	2.32	42.05	XIC(42.05Â±500ppm)	12299964	1187	461	7.75034 min, 3.201 s	0.168	873
Pentanoic acid, 3-methyl-, methyl ester	1.25	74.04	XIC(74.04Â±500ppm)	4972211	1080	826	7.83368 min, 2.119 s	0.138	887
2,6-Lutidine	2.21	107.07	XIC(107.07Â±500ppm)	37983054	1644	3313	7.91702 min, 2.560 s	0.165	889
2-Butenal, 2-ethenyl-	1.11	67.07	XIC(67.07Â±500ppm)	2812557	491	570	8.00036 min, 2.931 s	0.158	793
Pentanoic acid, 4-methyl-, methyl ester	1.36	74.04	XIC(74.04Â±500ppm)	3522372	795	849	8.0837 min, 2.153 s	0.131	829
2-Heptanone	0.85	43.04	XIC(43.04Â±500ppm)	13839009	1007	521	8.0837 min, 2.275 s	0.14	920
4-Octene, (E)-	3.41	55.06	XIC(55.06Â±500ppm)	2400227	421	326	8.16704 min, 2.587 s	0.213	798
2-Furanone, 2,5-dihydro-3,5-dimethyl	1.18	69.05	XIC(69.05Â±500ppm)	1839560	287	386	8.41706 min, 2.899 s	0.144	730
Ethanone, 1-(2-furanyl)-	1.25	95.01	XIC(95.01Â±500ppm)	10779125	1510	2353	8.5004 min, 3.072 s	0.147	890
Pyridine, 2-ethyl-	2.77	106.07	XIC(106.07Â±500ppm)	10630451	1438	993	8.66708 min, 2.685 s	0.165	791
Methane, dipropoxy-	5.06	43.04	XIC(43.04Â±500ppm)	5787080	234	368	8.75042 min, 3.001 s	0.157	709
1,3-Cyclopentanedione	0.79	42.03	XIC(42.03Â±500ppm)	12470355	580	241	8.75042 min, 3.681 s	0.142	808
5-Hexenoic acid, methyl ester	7.79	74.04	XIC(74.04Â±500ppm)	1233873	181	157	8.83376 min, 2.341 s	0.115	794
Butanoic acid, 4-hydroxy-	1.31	42.06	XIC(42.06Â±500ppm)	222588711	7170	3448	8.83376 min, 4.493 s	0.21	936
Pyrazine, ethyl-	1.74	107.06	XIC(107.06Â±500ppm)	7156516	787	1297	8.9171 min, 2.887 s	0.16	895
Vinyl butyrate	1.98	43.06	XIC(43.06Â±500ppm)	9193256	487	412	8.9171 min, 2.987 s	0.215	800
Anisole	1.18	108.06	XIC(108.06Â±500ppm)	17128031	5121	3279	9.00044 min, 2.844 s	0.14	866
p-Benzoquinone	0.62	54.03	XIC(54.03Â±500ppm)	4782941	492	682	9.08378 min, 3.872 s	0.156	916
3-Hexen-2-one, 3-methyl-	0.55	41.06	XIC(41.06Â±500ppm)	1778029	220	134	9.25046 min, 2.481 s	0.127	784
3-Furancarboxylic acid, methyl ester	1.29	95.01	XIC(95.01Â±500ppm)	4628298	1303	1301	9.25046 min, 2.777 s	0.135	859
3,4,5,6-Tetrahydrophthalic anhydride	1.25	79.06	XIC(79.06Â±500ppm)	6507472	1214	584	9.25046 min, 3.027 s	0.17	781
Hexanoic acid, methyl ester	1.51	74.04	XIC(74.04Â±500ppm)	5216510	691	522	9.41714 min, 2.247 s	0.116	851
2,5-Hexanedione	1.26	43.04	XIC(43.04Â±500ppm)	42233939	3050	1558	9.50048 min, 3.468 s	0.175	835
Furan, 2-ethyl-	3.93	96.06	XIC(96.06Â±500ppm)	3569856	448	519	9.50048 min, 3.499 s	0.225	711
2-Cyclohexen-1-one	1.27	68.04	XIC(68.04Â±500ppm)	29219697	4466	2615	9.58382 min, 3.546 s	0.174	842
Pyridine, 2,5-dimethyl-	2.98	107.07	XIC(107.07Â±500ppm)	26031423	1614	2050	9.66716 min, 2.810 s	0.163	927
2-Cyclopenten-1-one, 3,4-dimethyl-	1.19	67.07	XIC(67.07Â±500ppm)	33787779	5868	2561	9.83384 min, 2.972 s	0.165	838
2(5H)-Furanone, 5-methyl-	1.21	55.04	XIC(55.04Â±500ppm)	25253290	2974	1897	10.0005 min, 4.120 s	0.175	875
Pyridine, 2,3-dimethyl-	2.64	107.07	XIC(107.07Â±500ppm)	6347855	676	837	10.2505 min, 2.929 s	0.179	764
Cyclohexanone, 2-methyl-	3.99	68.07	XIC(68.07Â±500ppm)	1537473	134	349	10.2505 min, 2.981 s	0.158	728
Cyclohexanone, 3-methyl-	2.67	69.04	XIC(69.04Â±500ppm)	2041449	479	468	10.3339 min, 3.055 s	0.188	823
Pentanoic acid, 4-methyl-	1.22	57.09	XIC(57.09Â±500ppm)	675418	145	141	10.4172 min, 2.160 s	0.119	781
trans,trans-3,5-Heptadien-2-one	1.39	67.07	XIC(67.07Â±500ppm)	2199245	472	359	10.4172 min, 2.816 s	0.181	780
2(3H)-Furanone, dihydro-5-methyl-	1.25	56.06	XIC(56.06Â±500ppm)	15423537	1615	1409	10.5006 min, 4.182 s	0.185	959
Cyclopentanone, 3,4-bis(methylene)-	1.24	79.06	XIC(79.06Â±500ppm)	16827270	1284	1304	10.5839 min, 3.114 s	0.149	820
Pyridine, 3-ethyl-	2.87	92.05	XIC(92.05Â±500ppm)	3199884	799	536	10.7506 min, 3.031 s	0.171	913
3-Hexene-2,5-dione	1.11	43.04	XIC(43.04Â±500ppm)	5473912	371	297	10.8339 min, 3.622 s	0.143	722
2,3-Pentanedione	1.08	57.05	XIC(57.05Â±500ppm)	58426035	1746	7806	11.0006 min, 3.229 s	0.144	810
Pyridine, 2-ethyl-6-methyl-	0.78	120.08	XIC(120.08Â±500ppm)	9871513	367	1393	11.0839 min, 2.722 s	0.134	895
2-Butanone, 1-(acetyloxy)-	1.18	43.03	XIC(43.03Â±500ppm)	39223239	2437	1369	11.1673 min, 3.227 s	0.148	873
2-Cyclopenten-1-one, 2,3,4-trimethyl-	3.28	81.08	XIC(81.08Â±500ppm)	1361479	738	265	11.2506 min, 2.762 s	0.171	786
2H-Pyran-2-one	1.35	68.04	XIC(68.04Â±500ppm)	14590748	2798	1828	11.2506 min, 4.520 s	0.179	835
2-Acetyl-5-methylfuran	2.52	109.03	XIC(109.03Â±500ppm)	5903201	697	1892	11.334 min, 3.129 s	0.156	864
Methyl 2-furoate	1.18	95.01	XIC(95.01Â±500ppm)	58839040	3082	6638	11.5006 min, 3.396 s	0.152	941
4(1H)-Pyrimidinone, 2-methyl-	1.12	110.04	XIC(110.04Â±500ppm)	51665722	4993	6264	11.584 min, 4.194 s	0.173	707
3-Octanone	5.34	43.07	XIC(43.07Â±500ppm)	1470159	501	140	12.0007 min, 2.411 s	0.116	883
Pentanoic acid, 4-oxo-, methyl ester	1.18	43.04	XIC(43.04Â±500ppm)	26628425	1656	842	12.084 min, 3.496 s	0.161	911
Benzene, 2-propenyl-	1.11	117.07	XIC(117.07Â±500ppm)	21578337	1401	5044	12.2507 min, 2.757 s	0.13	926
Benzofuran	1.09	118.04	XIC(118.04Â±500ppm)	51547584	2538	16877	12.334 min, 3.213 s	0.142	938
1,3-Benzodioxole	1.03	121.03	XIC(121.03Â±500ppm)	3489176	425	1398	12.5841 min, 3.346 s	0.138	885
Pyridine, 3-methoxy-	2.81	109.05	XIC(109.05Â±500ppm)	40549515	2220	2087	12.5841 min, 3.613 s	0.172	880
Pentane, 3-bromo-	1.48	71.06	XIC(71.06Â±500ppm)	372355227	13446	14651	12.8341 min, 3.495 s	0.188	819
3-Pyridinecarbonitrile	1.73	104.04	XIC(104.04Â±500ppm)	3864370	336	707	12.8341 min, 4.188 s	0.181	962
1-Propanone, 1-(2-furanyl)-	1.53	95.02	XIC(95.02Â±500ppm)	23608328	1891	2974	12.9174 min, 3.366 s	0.144	911
Pyridine, 2,3,6-trimethyl-	2.73	121.09	XIC(121.09Â±500ppm)	4508522	410	907	13.0008 min, 2.926 s	0.171	770
Benzene, 1-methoxy-2-methyl-	1.14	122.07	XIC(122.07Â±500ppm)	6231127	465	1932	13.0008 min, 2.953 s	0.145	854
Benzene, 1,3-dichloro-	1.13	145.97	XIC(145.97Â±500ppm)	7824389	1918	6697	13.0008 min, 3.021 s	0.121	927
2,2-Dimethyl-3-vinylcyclopentanone	1.18	138.07	XIC(138.07Â±500ppm)	1419528	776	982	13.0008 min, 3.258 s	0.185	705
p-Benzoquinone, 2-methyl-	1.02	54.03	XIC(54.03Â±500ppm)	1484834	649	296	13.0841 min, 3.984 s	0.167	896
3-Ethenyl-3-methylcyclopentanone	1.1	68.04	XIC(68.04Â±500ppm)	8663717	1358	862	13.2508 min, 3.806 s	0.166	723
5,6,7,8-Tetrahydroindolizine	3.72	120.08	XIC(120.08Â±500ppm)	3561888	902	1026	13.3341 min, 2.932 s	0.162	764
Benzoxazole	1.9	119.04	XIC(119.04Â±500ppm)	3342308	664	869	13.3341 min, 3.589 s	0.17	953
Benzene, 1-methoxy-4-methyl-	1.09	122.07	XIC(122.07Â±500ppm)	57951754	3441	11866	13.4175 min, 3.035 s	0.137	935
4,4-Dimethyl-2-cyclopenten-1-one	1.48	95.05	XIC(95.05Â±500ppm)	12869213	1090	1304	13.4175 min, 3.634 s	0.174	774
Cyclohexene, 1-methyl-4-(1-methylethyl)-, (R)-	0.68	95.09	XIC(95.09Â±500ppm)	661011	124	145	13.5008 min, 2.149 s	0.106	862
Benzene, 1-propenyl-	1.09	117.07	XIC(117.07Â±500ppm)	5206670	1308	1890	13.6675 min, 2.881 s	0.122	947
2-Cyclopenten-1-one, 3,4,5-trimethyl-	1.32	81.08	XIC(81.08Â±500ppm)	3864460	832	716	13.6675 min, 3.063 s	0.151	827
1,2-Cyclopentanedione, 3-methyl-	1.14	112.05	XIC(112.05Â±500ppm)	28598320	1698	3866	13.6675 min, 3.584 s	0.14	916
Heptanoic acid, methyl ester	1.23	74.04	XIC(74.04Â±500ppm)	1687699	450	358	13.7508 min, 2.366 s	0.108	820
Pyridine, 2-ethyl-5-methyl-	2.36	106.07	XIC(106.07Â±500ppm)	1353177	255	301	13.7508 min, 2.983 s	0.151	796
1,4-Cyclohex-2-enedione	1.14	54.04	XIC(54.04Â±500ppm)	4152135	651	590	13.8342 min, 4.051 s	0.145	857
2-Cyclopenten-1-one, 3,4,4-trimethyl-	2.53	81.08	XIC(81.08Â±500ppm)	2220171	338	555	13.9175 min, 3.079 s	0.173	785
Benzene, 1-ethyl-4-methoxy-	0.51	121.03	XIC(121.03Â±500ppm)	4460401	373	1513	13.9175 min, 3.194 s	0.137	732
Ethylidenecycloheptane	1.3	96.06	XIC(96.06Â±500ppm)	5392305	474	1083	14.0008 min, 3.098 s	0.155	753
1,3-Cyclohexadiene, 5-ethyl-	1.14	79.06	XIC(79.06Â±500ppm)	8301957	907	766	14.0842 min, 3.629 s	0.191	741
3(2H)-Pyridazinone, 6-methyl-	1.36	110.04	XIC(110.04Â±500ppm)	1603465	427	404	14.0842 min, 4.261 s	0.174	783
Amyl cyclopentenone	1.29	84.06	XIC(84.06Â±500ppm)	1713320	580	494	14.1675 min, 2.978 s	0.146	737
2-Furancarboxylic acid, 3-methyl-, methyl ester	1.16	109.03	XIC(109.03Â±500ppm)	5616014	773	937	14.1675 min, 3.008 s	0.127	753
4-Oxohex-2-enal	1.19	83.04	XIC(83.04Â±500ppm)	3774831	1229	988	14.2509 min, 4.255 s	0.169	868
1H-Indene, 1-chloro-2,3-dihydro-	1.07	115.05	XIC(115.05Â±500ppm)	93874588	4619	13607	14.4175 min, 3.306 s	0.145	933
Benzaldehyde, 2-hydroxy-	1.16	121.03	XIC(121.03Â±500ppm)	7610818	1127	1902	14.4175 min, 3.657 s	0.149	853
Benzene, 3-butenyl-	1.14	91.06	XIC(91.06Â±500ppm)	2912335	298	321	14.5009 min, 2.700 s	0.123	808
4-Methyl-5H-furan-2-one	1.31	69.04	XIC(69.04Â±500ppm)	14569639	3603	1825	14.5009 min, 5.047 s	0.186	869
4,4-Dimethylcyclohexadienone	2.71	79.06	XIC(79.06Â±500ppm)	1981440	414	308	14.5842 min, 3.200 s	0.152	792
Cyclohexene, 1-methyl-3-(1-methylethyl)-	1.14	95.05	XIC(95.05Â±500ppm)	3979856	564	850	14.7509 min, 3.280 s	0.138	735
1H-Indene, octahydro-, trans-	1.43	96.07	XIC(96.07Â±500ppm)	2657376	362	504	14.8342 min, 3.169 s	0.155	742
2H-Pyran-2-one, tetrahydro-	1.28	42.03	XIC(42.03Â±500ppm)	44388967	4639	947	14.9176 min, 5.240 s	0.21	885
2-Cyclopenten-1-one, 3-ethyl-2-hydroxy-	1.72	43.05	XIC(43.05Â±500ppm)	2794944	200	163	15.0009 min, 3.259 s	0.165	726
2(3H)-Furanone, 5-ethyldihydro-	1.28	85.03	XIC(85.03Â±500ppm)	3031583	1065	953	15.0009 min, 4.261 s	0.169	902
5-Ethyl-2-furaldehyde	1.22	124.05	XIC(124.05Â±500ppm)	1312125	302	654	15.1676 min, 3.569 s	0.131	840
Ethanone, 1-(1H-pyrrol-2-yl)-	1.29	94.03	XIC(94.03Â±500ppm)	1588594	735	181	15.2509 min, 3.957 s	0.156	874
Benzene, 1,3-diethyl-	0.86	105.07	XIC(105.07Â±500ppm)	1320223	236	307	15.3343 min, 2.669 s	0.134	813
Acetic acid, phenyl ester	1.12	94.04	XIC(94.04Â±500ppm)	5882238	1163	705	15.3343 min, 3.427 s	0.145	890
Bicyclo[3.2.0]hept-3-en-2-one	1.37	79.06	XIC(79.06Â±500ppm)	2003667	307	233	15.4176 min, 4.076 s	0.172	850
Benzaldehyde, 2-methyl-	1.41	91.06	XIC(91.06Â±500ppm)	31861735	2573	2117	15.5843 min, 3.623 s	0.149	874
Benzyl nitrile	1.46	117.06	XIC(117.06Â±500ppm)	15975870	1327	2747	15.5843 min, 3.761 s	0.161	794
1-Phenyl-1-butene	1.16	117.07	XIC(117.07Â±500ppm)	630127	196	228	15.6676 min, 2.774 s	0.113	760
Cyclohexanone, 3-ethenyl-	1.18	124.05	XIC(124.05Â±500ppm)	1418275	330	466	15.751 min, 4.072 s	0.141	789
2,3-Dimethyl-4-hydroxy-2-butenoic lactone	1.23	55.07	XIC(55.07Â±500ppm)	3294584	1811	326	15.8343 min, 4.350 s	0.172	762
2,4-Dimethylstyrene	1.13	117.07	XIC(117.07Â±500ppm)	1251358	581	464	15.9177 min, 2.835 s	0.153	815
2,4-Heptadienal, (E,E)-	1.47	81.04	XIC(81.04Â±500ppm)	16186791	2421	1863	15.9177 min, 3.848 s	0.153	839
Phenol, 3-methyl-	1.57	108.05	XIC(108.05Â±500ppm)	411505791	6141	9140	16.0843 min, 3.230 s	0.164	934
Benzofuran, 2,3-dihydro-	0.24	91.06	XIC(91.06Â±500ppm)	20237121	719	1242	16.0843 min, 3.765 s	0.141	848
Heptanoic acid	1.28	60.04	XIC(60.04Â±500ppm)	1816339	290	312	16.1677 min, 2.344 s	0.095	903
2-Methylindene	1.11	130.08	XIC(130.08Â±500ppm)	4488509	282	1886	16.1677 min, 3.141 s	0.135	858
1,2,4-Triazin-3-amine, 5,6-dimethyl-	1.14	124.05	XIC(124.05Â±500ppm)	13978111	761	3030	16.251 min, 4.155 s	0.161	723
Benzene, 1-methyl-3-(1-methylethenyl)-	1.1	117.07	XIC(117.07Â±500ppm)	4412429	779	1189	16.3344 min, 2.809 s	0.131	883
Naphthalene, 1,2-dihydro-4-methyl-	1.3	129.08	XIC(129.08Â±500ppm)	880389	218	359	16.3344 min, 2.858 s	0.162	756
1,10-Undecadiene	0.39	41.06	XIC(41.06Â±500ppm)	742257	123	59	16.4177 min, 1.994 s	0.088	854
Benzene, 1-ethyl-2,3-dimethyl-	1.11	119.09	XIC(119.09Â±500ppm)	22822595	3509	4496	16.4177 min, 2.692 s	0.124	903
Furan, 2,2'-methylenebis-	0.5	91.06	XIC(91.06Â±500ppm)	2227131	198	292	16.4177 min, 3.180 s	0.117	877
3-Acetyl-2,5-dimethyl furan	2.06	43.04	XIC(43.04Â±500ppm)	5809316	498	296	16.4177 min, 3.284 s	0.214	822
2-Cyclohexen-1-one, 3,4-dimethyl-	1.42	96.06	XIC(96.06Â±500ppm)	5187324	659	969	16.501 min, 3.418 s	0.154	765
3,4-Dimethylbenzyl alcohol	1.17	93.07	XIC(93.07Â±500ppm)	392279	129	108	16.5844 min, 2.444 s	0.108	756
3-Nonanone	1.86	43.07	XIC(43.07Â±500ppm)	786866	156	65	16.5844 min, 2.483 s	0.11	851
Benzene, 1-methyl-4-(1-methylethenyl)-	1.06	117.07	XIC(117.07Â±500ppm)	14271033	1330	1929	16.5844 min, 2.845 s	0.119	921
p-Cresyl formate	0.45	107.05	XIC(107.05Â±500ppm)	9394608	285	489	16.5844 min, 3.109 s	0.118	852
Phenol, 2-methoxy-	1.16	109.03	XIC(109.03Â±500ppm)	249688462	3216	6907	16.5844 min, 3.615 s	0.154	904
Benzonitrile, 3-methyl-	1.53	117.06	XIC(117.06Â±500ppm)	14707377	1743	2227	16.5844 min, 3.790 s	0.146	905
2,5-Pyrrolidinedione, 1-methyl-	1.47	113.05	XIC(113.05Â±500ppm)	43644466	2101	4092	16.6677 min, 5.406 s	0.207	933
Cyclopropyl carbinol	1.33	44.04	XIC(44.04Â±500ppm)	11481240	469	165	16.7511 min, 5.166 s	0.218	763
Benzoic acid, methyl ester	1.19	105.03	XIC(105.03Â±500ppm)	23439102	4315	3075	16.8344 min, 3.481 s	0.14	938
4-Hepten-3-one, 4-methyl-	1.28	97.04	XIC(97.04Â±500ppm)	6550129	1178	1578	16.9177 min, 3.887 s	0.155	813
1,2-Ethanediol, 1,2-diphenyl-, [R-(R*,R*)]-	0.42	107.05	XIC(107.05Â±500ppm)	1046987	144	170	17.0011 min, 3.007 s	0.114	707
Benzofuran, 2-methyl-	1.06	131.05	XIC(131.05Â±500ppm)	37090140	2060	10618	17.0011 min, 3.318 s	0.139	916
Hexanoic acid, 5-oxo-, methyl ester	1.75	43.04	XIC(43.04Â±500ppm)	2783169	328	172	17.0011 min, 3.520 s	0.171	875
3-Undecene, (E)-	2.53	69.08	XIC(69.08Â±500ppm)	691002	102	158	17.0844 min, 1.910 s	0.089	816
2-Methyl-1-octen-3-yne	0.89	79.06	XIC(79.06Â±500ppm)	4057462	519	426	17.0844 min, 3.535 s	0.179	737
Benzene, (1,2-dimethylpropyl)-	1.16	105.07	XIC(105.07Â±500ppm)	2789289	611	710	17.1678 min, 2.501 s	0.129	825
2-Ethyl-3-methylcyclopent-2-en-1-one	1.58	81.08	XIC(81.08Â±500ppm)	7075521	1673	1215	17.2511 min, 3.460 s	0.166	793
2-Cyclohexen-1-one, 4,4-dimethyl-	1.14	68.05	XIC(68.05Â±500ppm)	2655457	312	476	17.2511 min, 3.792 s	0.135	745
Benzonitrile, 4-methyl-	1.47	117.06	XIC(117.06Â±500ppm)	5684319	1976	1107	17.2511 min, 3.844 s	0.146	959
3-Undecene, (Z)-	0.98	55.07	XIC(55.07Â±500ppm)	829179	113	107	17.4178 min, 1.927 s	0.083	870
Phenol, 2,4-dimethyl-	1.07	107.05	XIC(107.05Â±500ppm)	20922608	746	1588	17.4178 min, 3.402 s	0.142	775
Pyrazine, 2,6-diethyl-	0.99	135.05	XIC(135.05Â±500ppm)	3269527	805	1001	17.4178 min, 3.434 s	0.126	744
2,5-Cyclohexadiene-1,4-dione, 2,6-dimethyl-	1.02	68.04	XIC(68.04Â±500ppm)	3075009	322	402	17.4178 min, 3.828 s	0.139	833
2,5-Dimethylanisole	1.87	136.09	XIC(136.09Â±500ppm)	11717494	878	3277	17.5845 min, 2.967 s	0.2	894
2,2-Dimethylindene, 2,3-dihydro-	1.1	131.09	XIC(131.09Â±500ppm)	589944	211	249	17.7511 min, 2.657 s	0.13	777
Levoglucosenone	1.09	98.04	XIC(98.04Â±500ppm)	962970	372	370	17.7511 min, 4.755 s	0.177	898
Benzene, 1-ethyl-4-(1-methylethyl)-	2.1	133.1	XIC(133.10Â±500ppm)	1277859	212	421	17.8345 min, 2.589 s	0.133	749
3,5-Dimethylanisole	1.11	136.09	XIC(136.09Â±500ppm)	6099913	746	1893	18.0012 min, 3.074 s	0.134	808
5-Oxotetrahydrofuran-2-carboxylic acid	1.24	85.02	XIC(85.02Â±500ppm)	5994141	2596	1628	18.0012 min, 4.795 s	0.164	739
2-Cyclopenten-1-one, 2,3,4,5-tetramethyl-	1.35	123.08	XIC(123.08Â±500ppm)	2032464	523	625	18.0845 min, 3.114 s	0.158	755
Benzene, 1,3-diethenyl-	0.94	130.08	XIC(130.08Â±500ppm)	1328224	429	698	18.2512 min, 3.150 s	0.115	833
Octanoic acid, methyl ester	1.16	74.04	XIC(74.04Â±500ppm)	1885337	404	352	18.4179 min, 2.406 s	0.102	889
Benzyl methyl ketone	1.13	43.04	XIC(43.04Â±500ppm)	4213772	1466	271	18.4179 min, 3.825 s	0.176	817
Benzonitrile, 4-chloro-	1.35	137.01	XIC(137.01Â±500ppm)	1813631	1030	1029	18.4179 min, 3.986 s	0.144	910
Benzene, 2-ethenyl-1,4-dimethyl-	1.06	117.07	XIC(117.07Â±500ppm)	4812098	972	1470	18.5012 min, 2.916 s	0.115	924
2(3H)-Furanone, 5-acetyldihydro-	1.13	85.03	XIC(85.03Â±500ppm)	5682470	1531	1468	18.5012 min, 5.386 s	0.188	832
3-(4-Pyridyl)acrylaldehyde	2.13	133.06	XIC(133.06Â±500ppm)	2221176	689	512	18.6679 min, 3.832 s	0.166	856
Benzene, 1,3-dimethyl-5-(1-methylethyl)-	1.09	133.11	XIC(133.11Â±500ppm)	4215596	821	1188	18.7512 min, 2.635 s	0.129	849
2-Methoxy-5-methylphenol	1.01	123.05	XIC(123.05Â±500ppm)	852486	200	405	18.7512 min, 3.486 s	0.145	783
2,5-Pyrrolidinedione, 1-ethyl-	1.36	56.04	XIC(56.04Â±500ppm)	2007284	467	371	18.7512 min, 4.808 s	0.195	873
1H-Indene, 2,3-dihydro-1,3-dimethyl-	1.79	131.09	XIC(131.09Â±500ppm)	1109813	189	530	18.8346 min, 2.815 s	0.125	769
Ethanone, 1-(2-methylphenyl)-	1.3	91.06	XIC(91.06Â±500ppm)	4608037	1642	436	18.8346 min, 3.604 s	0.147	905
3-Methylene-2-norbornanone	0.33	79.06	XIC(79.06Â±500ppm)	895715	116	149	18.8346 min, 3.844 s	0.131	737
Phenol, 2-ethyl-	1.15	107.05	XIC(107.05Â±500ppm)	26060886	2689	2649	19.0012 min, 3.227 s	0.124	909
Pentanedioic acid, dimethyl ester	1.14	59.05	XIC(59.05Â±500ppm)	1564262	501	571	19.0012 min, 3.293 s	0.126	903
3-Hexen-2-one, 3,4-dimethyl-	1.15	55.07	XIC(55.07Â±500ppm)	7168616	1699	585	19.0846 min, 4.210 s	0.17	766
Benzene, 1,4-diethyl-2-methyl-	1.02	133.11	XIC(133.11Â±500ppm)	3978085	711	1228	19.1679 min, 2.635 s	0.133	880
1H-Indene, 1-methyl-	0.99	130.08	XIC(130.08Â±500ppm)	58397880	2519	11471	19.3346 min, 3.318 s	0.129	925
Benzene, 1,2-dimethoxy-	1.52	138.07	XIC(138.07Â±500ppm)	10809304	1562	2132	19.4179 min, 3.781 s	0.155	897
1H-Pyrrole-2-carbonitrile	1.23	92.04	XIC(92.04Â±500ppm)	2275648	563	442	19.4179 min, 4.067 s	0.145	794
Phenol, 2,6-dimethyl-	1.16	107.05	XIC(107.05Â±500ppm)	103224727	2461	4997	19.5013 min, 3.257 s	0.127	917
1H-Indene, 3-methyl-	1.1	130.08	XIC(130.08Â±500ppm)	62832128	1120	10588	19.5846 min, 3.364 s	0.169	922
Benzene, 1-ethenyl-4-methoxy-	1.06	134.08	XIC(134.08Â±500ppm)	1061430	311	425	19.5846 min, 3.415 s	0.119	778
Azulene	0.95	128.06	XIC(128.06Â±500ppm)	18032235	767	3469	19.5846 min, 3.702 s	0.135	887
1,4-Dioxaspiro[2.4]heptan-5-one, 7-methyl-	1.07	42.06	XIC(42.06Â±500ppm)	11575539	498	418	19.5846 min, 5.630 s	0.201	716
Benzene, (1-methylene-2-propenyl)-	0.65	91.06	XIC(91.06Â±500ppm)	1530974	236	202	19.8346 min, 3.404 s	0.194	734
Benzaldehyde, 2-hydroxy-6-methyl-	1.05	135.05	XIC(135.05Â±500ppm)	986515	219	290	19.8346 min, 3.703 s	0.129	796
Naphthalene, 1,2-dihydro-	1.12	128.06	XIC(128.06Â±500ppm)	9208847	936	2045	20.0013 min, 3.543 s	0.137	846
Ethanone, 1-(3-hydroxyphenyl)-	1.11	121.03	XIC(121.03Â±500ppm)	2790344	370	523	20.0013 min, 3.827 s	0.135	835
Benzene, (2-methyl-1-butenyl)-	0.47	91.06	XIC(91.06Â±500ppm)	1326210	216	171	20.0847 min, 2.818 s	0.12	780
Benzoic acid	1.42	44	XIC(105.03Â±500ppm)	6251364	127	922	20.168 min, 3.634 s	0.049	800
2H-1-Benzopyran, 3,4-dihydro-	1.01	134.07	XIC(134.07Â±500ppm)	848254	222	410	20.2513 min, 3.651 s	0.137	761
Benzene, 1,3-dimethoxy-	1.07	138.07	XIC(138.07Â±500ppm)	1828856	120	1069	20.2513 min, 3.689 s	0.136	780
4-Ethyl-2-hydroxycyclopent-2-en-1-one	1.32	97.03	XIC(97.03Â±500ppm)	1361650	433	440	20.2513 min, 4.383 s	0.168	751
Phenol, 3,5-dimethyl-	1.18	107.05	XIC(107.05Â±500ppm)	160475253	2634	5773	20.418 min, 3.281 s	0.129	884
4,4-Dimethyl-2-propenylcyclopentanone	0.96	152.09	XIC(152.09Â±500ppm)	1801681	154	587	20.5847 min, 3.470 s	0.132	748
Benzaldehyde, 2,5-dimethyl-	1.19	133.07	XIC(133.07Â±500ppm)	1705444	534	452	20.5847 min, 3.586 s	0.143	870
3-Amino-s-triazole	1.24	84.05	XIC(84.05Â±500ppm)	4317948	2053	949	20.5847 min, 3.813 s	0.145	732
Creosol	1.15	123.05	XIC(123.05Â±500ppm)	11232577	928	2437	20.7514 min, 3.483 s	0.13	825
Benzene, 2-ethenyl-1,3,5-trimethyl-	1.68	131.09	XIC(131.09Â±500ppm)	1978333	780	565	20.8347 min, 2.813 s	0.122	877
Benzoic acid, 2-methyl-, methyl ester	2.17	119.05	XIC(119.05Â±500ppm)	2588599	373	594	20.8347 min, 3.388 s	0.138	749
1H-Indene, 2,3-dihydro-4,7-dimethyl-	0.71	131.09	XIC(131.09Â±500ppm)	4589940	442	1022	20.9181 min, 2.904 s	0.115	871
Ethyl-2-benzofuran	1.07	131.05	XIC(131.05Â±500ppm)	7602450	1132	2815	20.9181 min, 3.319 s	0.128	867
Furan, 2-(2-furanylmethyl)-5-methyl-	1.03	162.07	XIC(162.07Â±500ppm)	1462016	697	1644	21.0014 min, 3.191 s	0.112	916
Phenol, 2-ethyl-5-methyl-	1.19	121.07	XIC(121.07Â±500ppm)	6909256	617	1282	21.0014 min, 3.388 s	0.128	835
Ethanone, 1-(4-methylphenyl)-	1.67	119.05	XIC(119.05Â±500ppm)	8282843	444	1185	21.0014 min, 3.745 s	0.142	776
1,11-Dodecadiene	0.94	55.07	XIC(55.07Â±500ppm)	1040328	144	158	21.0847 min, 2.030 s	0.086	877
1,2-Naphthalenedione	1.1	102.05	XIC(102.05Â±500ppm)	1636806	195	534	21.0847 min, 4.286 s	0.143	885
2-Propenal, 3-(4-methylphenyl)-	1.16	131.05	XIC(131.05Â±500ppm)	1501609	401	529	21.2514 min, 3.948 s	0.182	772
Benzo[c]thiophene	1.05	134.02	XIC(134.02Â±500ppm)	8080886	1088	3885	21.2514 min, 4.113 s	0.141	933
3-Methyl-2,3-dihydro-benzofuran	0.44	134.08	XIC(134.08Â±500ppm)	1432605	235	735	21.4181 min, 3.775 s	0.134	726
Pyrrolidine, 2,5-dimethyl-1-nitroso-	1.09	55.06	XIC(55.06Â±500ppm)	5038235	265	409	21.4181 min, 5.441 s	0.172	731
Phenol, 3,4-dimethyl-	1.22	107.05	XIC(107.05Â±500ppm)	28451135	3368	2196	21.5014 min, 3.434 s	0.131	828
Benzene, pentamethyl-	1.05	133.11	XIC(133.11Â±500ppm)	4742869	738	1230	21.6681 min, 2.765 s	0.115	837
Benzofuran, 4,7-dimethyl-	1.05	146.08	XIC(146.08Â±500ppm)	15692972	2542	7260	21.8348 min, 3.304 s	0.128	845
Phenol, 2,4,5-trimethyl-	1.1	121.07	XIC(121.07Â±500ppm)	7261467	913	1347	21.9181 min, 3.368 s	0.129	884
Benzoic acid, 3-methyl-, methyl ester	1.17	119.05	XIC(119.05Â±500ppm)	4800582	643	1390	22.0015 min, 3.449 s	0.125	940
2-Dodecene, (Z)-	1.27	55.07	XIC(55.07Â±500ppm)	1005411	135	140	22.0848 min, 1.959 s	0.078	900
Benzene, 1-ethyl-2,4,5-trimethyl-	1.09	133.1	XIC(133.10Â±500ppm)	1191399	532	453	22.1682 min, 2.832 s	0.113	854
Benzene, 1-methoxy-4-(1-methylethyl)-	1.13	135.08	XIC(135.08Â±500ppm)	1863621	367	376	22.1682 min, 3.030 s	0.121	791
Benzoic acid, 4-methyl-, methyl ester	0.74	119.05	XIC(119.05Â±500ppm)	2795010	230	748	22.3348 min, 3.487 s	0.126	748
N-Benzyl-2-phenethylamine	1.15	120.06	XIC(120.06Â±500ppm)	5757364	1065	1388	22.3348 min, 3.510 s	0.123	732
2-Propenal, 3-(2-furanyl)-	1.29	122.04	XIC(122.04Â±500ppm)	1534749	676	412	22.3348 min, 5.074 s	0.171	744
Tricyclo[4.2.1.1(2,5)]deca-3,7-diene-9,10-dione, (1a,2ÃŸ,5ÃŸ,6a)-	1.05	131.05	XIC(131.05Â±500ppm)	19251728	7094	3027	22.5849 min, 4.598 s	0.177	862
3,4-Anhydro-d-galactosan	0.97	43.04	XIC(43.04Â±500ppm)	811416	458	68	22.5849 min, 4.986 s	0.22	829
1H-Indazole, 5,7-dimethyl-	1.01	131.05	XIC(131.05Â±500ppm)	13585473	1858	2950	22.6682 min, 3.380 s	0.122	818
3-Cyclohexen-1-one, 3,5,5-trimethyl-	1.44	123.09	XIC(123.09Â±500ppm)	646375	259	254	22.7515 min, 3.402 s	0.148	790
Mequinol	1.15	109.03	XIC(109.03Â±500ppm)	1852864	423	550	22.7515 min, 3.874 s	0.13	883
Benzothiazole	2.41	135.02	XIC(135.02Â±500ppm)	1339304	199	340	22.7515 min, 4.625 s	0.182	794
Phenol, 4-propyl-	1.12	107.05	XIC(107.05Â±500ppm)	1941973	442	431	22.8349 min, 3.178 s	0.115	752
2H-Inden-2-one, 1,3-dihydro-	1.35	104.07	XIC(104.07Â±500ppm)	1660251	345	402	22.8349 min, 4.280 s	0.141	902
2,5-Pyrrolidinedione, 1-propyl-	3.77	56.05	XIC(56.05Â±500ppm)	365891	232	81	22.8349 min, 4.541 s	0.163	739
Benzofuran, 2-ethenyl-	1.91	144.06	XIC(144.06Â±500ppm)	5146119	993	2112	22.9182 min, 3.521 s	0.137	919
2,3-Anhydro-d-mannosan	1.03	71.02	XIC(71.02Â±500ppm)	2213729	736	681	22.9182 min, 4.855 s	0.177	809
Nonanoic acid, methyl ester	1.21	74.04	XIC(74.04Â±500ppm)	786225	321	223	23.0016 min, 2.403 s	0.089	852
Phenol, 2-ethyl-6-methyl-	1.14	121.07	XIC(121.07Â±500ppm)	16426311	880	2363	23.1682 min, 3.215 s	0.117	877
Phenol, 2,4,6-trimethyl-	0.34	121.07	XIC(121.07Â±500ppm)	5190050	533	1353	23.1682 min, 3.503 s	0.122	898
m-Guaiacol	1.19	124.05	XIC(124.05Â±500ppm)	2464397	648	698	23.1682 min, 3.827 s	0.133	824
2-Ethyl-2,3-dihydro-1H-indene	1.19	117.07	XIC(117.07Â±500ppm)	3849271	859	923	23.2516 min, 3.105 s	0.135	771
2-Coumaranone	1.04	78.06	XIC(78.06Â±500ppm)	2763223	225	162	23.2516 min, 4.649 s	0.14	844
Quinoline	2.58	129.06	XIC(129.05Â±500ppm)	15490751	1892	1912	23.3349 min, 4.436 s	0.175	956
1H-Indene, 2,3-dihydro-1,1,3-trimethyl-	3.59	145.11	XIC(145.11Â±500ppm)	552342	176	354	23.5016 min, 2.784 s	0.125	813
2-Ethyl-1-H-indene	1.12	129.07	XIC(129.07Â±500ppm)	1205205	210	218	23.5016 min, 3.368 s	0.126	806
2(3H)-Furanone, dihydro-5-propyl-	1.16	85.03	XIC(85.03Â±500ppm)	3384748	884	1043	23.5016 min, 5.173 s	0.178	773
1-Benzofuran-5-ol	1.17	134.04	XIC(134.04Â±500ppm)	4726076	898	1342	23.5849 min, 3.952 s	0.134	886
Benzenepropanenitrile	1.43	91.06	XIC(91.06Â±500ppm)	3610303	708	347	23.5849 min, 4.562 s	0.168	830
3,4-Dimethoxytoluene	1.49	152.09	XIC(152.09Â±500ppm)	11743959	2204	2084	23.6683 min, 3.579 s	0.141	911
Phenol, 3-ethyl-5-methyl-	1.17	121.07	XIC(121.07Â±500ppm)	9460616	917	1327	23.835 min, 3.239 s	0.112	883
Phenol, 2-ethyl-4,5-dimethyl-	2.3	135.05	XIC(135.05Â±500ppm)	2394378	187	575	24.0016 min, 3.488 s	0.224	770
2(3H)-Benzofuranone, 3-methyl-	1.16	120.06	XIC(120.06Â±500ppm)	999497	252	359	24.0016 min, 4.205 s	0.157	877
2,3-Dimethyl-pyrrolo(2,3-b)pyrazine	1.94	147.07	XIC(147.07Â±500ppm)	996154	362	415	24.085 min, 3.808 s	0.146	724
Benzene, (1,3-dimethylbutyl)-	1.07	105.07	XIC(105.07Â±500ppm)	971014	289	252	24.1683 min, 2.586 s	0.097	809
Isoquinoline	2.17	129.06	XIC(129.06Â±500ppm)	1351885	448	315	24.335 min, 4.435 s	0.17	897
Benzene, hexyl-	1.06	91.06	XIC(91.06Â±500ppm)	5527842	1177	727	24.5017 min, 2.582 s	0.092	895
Resorcinol, 2-acetyl-	0.51	137.07	XIC(137.07Â±500ppm)	1487341	225	755	24.585 min, 3.423 s	0.121	752
Benzofuran, 7-methoxy-	1.09	148.06	XIC(148.06Â±500ppm)	3135019	642	1828	24.585 min, 4.054 s	0.139	901
1,2-Benzenedicarbonitrile	3.36	128.04	XIC(128.04Â±500ppm)	3626809	602	1100	24.7517 min, 5.264 s	0.192	949
1H-Indene, 2,3-dimethyl-	2.06	129.07	XIC(129.07Â±500ppm)	6484871	514	1352	24.835 min, 3.327 s	0.141	874
3,5-Dimethoxytoluene	1.16	152.09	XIC(152.09Â±500ppm)	5727608	935	1552	24.835 min, 3.522 s	0.128	905
4'-Methylpropiophenone	1.22	119.05	XIC(119.05Â±500ppm)	1228033	324	376	25.0017 min, 3.492 s	0.119	849
1-Naphthalenol	0.93	115.06	XIC(115.06Â±500ppm)	1540056	251	467	25.0017 min, 3.971 s	0.126	866
Phenol, 2,3,5-trimethyl-	1.11	121.07	XIC(121.07Â±500ppm)	8497320	1606	1566	25.0851 min, 3.366 s	0.12	921
N-[2-Hydroxyethyl]succinimide	1.31	100.04	XIC(100.04Â±500ppm)	1129009	492	465	25.0851 min, 4.234 s	0.167	716
1H-Inden-1-one, 2,3-dihydro-	1.3	104.06	XIC(104.06Â±500ppm)	20993756	1776	2401	25.2517 min, 4.664 s	0.167	897
Phenol, 4-ethyl-2-methoxy-	1.07	137.06	XIC(137.06Â±500ppm)	51153344	2040	5852	25.3351 min, 3.393 s	0.124	864
1H-Pyrrole, 1-phenyl-	1.2	143.08	XIC(143.08Â±500ppm)	887592	252	500	25.3351 min, 3.789 s	0.121	779
1,2,3-Trimethylindene	1.4	143.09	XIC(143.09Â±500ppm)	866337	360	478	25.4184 min, 3.070 s	0.114	794
Benzocycloheptatriene	1.17	141.07	XIC(141.07Â±500ppm)	2562205	691	951	25.5018 min, 3.606 s	0.126	775
Ethanone, 1-[4-(1-methylethenyl)phenyl]-	1.06	145.07	XIC(145.07Â±500ppm)	8056709	1007	1859	25.6684 min, 3.241 s	0.12	805
1H-Inden-1-one, 2,3-dihydro-3-methyl-	1.19	117.08	XIC(117.08Â±500ppm)	7258818	623	1059	25.6684 min, 4.233 s	0.152	827
Naphthalene, 1-methyl-	1.06	142.08	XIC(142.08Â±500ppm)	150098066	6803	18131	25.8351 min, 3.751 s	0.134	928
Thymol	1.11	135.08	XIC(135.08Â±500ppm)	1659921	331	464	26.0018 min, 3.300 s	0.113	755
Indole	1.17	117.06	XIC(117.05Â±500ppm)	7622523	1738	1372	26.0018 min, 4.656 s	0.157	933
6-Benzofuranylacetaldehyde	1.08	131.05	XIC(131.05Â±500ppm)	2844318	856	1120	26.1685 min, 3.217 s	0.11	895
2-Allylphenol	1.18	134.08	XIC(134.08Â±500ppm)	1530085	387	518	26.5018 min, 3.487 s	0.121	766
1H-Inden-1-one, 2,3-dihydro-3,3-dimethyl-	1.16	145.07	XIC(145.07Â±500ppm)	35933172	4934	7327	26.7519 min, 3.253 s	0.118	786
Benzofuran-2-carboxaldehyde	1.24	145.03	XIC(145.03Â±500ppm)	804228	208	260	26.8352 min, 4.481 s	0.151	810
1-Methylindan-2-one	1.44	131.05	XIC(131.05Â±500ppm)	4865030	436	945	26.9185 min, 4.295 s	0.2	830
Phenol, 3,4,5-trimethyl-	1.08	121.07	XIC(121.07Â±500ppm)	1288061	302	442	27.0019 min, 3.568 s	0.124	831
1H-Inden-5-ol, 2,3-dihydro-	2.05	134.07	XIC(134.07Â±500ppm)	1111604	281	424	27.0852 min, 3.889 s	0.13	808
3-Methoxy-5-methylphenol	1.19	138.07	XIC(138.07Â±500ppm)	2003325	478	886	27.3352 min, 3.750 s	0.126	873
Benzo[1,2-b:4,3-b']difuran	1.03	158.04	XIC(158.04Â±500ppm)	1848932	638	1245	27.3352 min, 4.026 s	0.131	891
Benzene, 4-ethyl-1,2-dimethoxy-	1.43	151.08	XIC(151.08Â±500ppm)	2607576	1014	946	27.4186 min, 3.453 s	0.129	852
Naphthalene, 1,2-dihydro-7-methoxy-	1.09	160.09	XIC(160.09Â±500ppm)	7704574	1118	4127	27.5019 min, 3.281 s	0.118	787
Benzene, 1-ethenyl-4-methyl-	1.18	118.08	XIC(118.08Â±500ppm)	540667	212	227	27.5853 min, 4.045 s	0.129	729
1-Naphthalenol, 4-methyl-	0.93	158.08	XIC(158.08Â±500ppm)	2064479	372	1291	27.6686 min, 3.488 s	0.126	829
2-Propenal, 3-phenyl-	1.21	132.06	XIC(132.06Â±500ppm)	1679560	349	575	27.6686 min, 4.094 s	0.131	867
3-Buten-2-one, 3-methyl-4-phenyl-	1.09	160.09	XIC(160.09Â±500ppm)	3171654	833	1771	27.9186 min, 3.334 s	0.11	742
Octane, 2,4,6-trimethyl-	1.57	57.09	XIC(57.09Â±500ppm)	765237	242	161	28.0853 min, 1.848 s	0.09	742
1,4-Benzenedicarboxaldehyde, 2-methyl-	1.26	148.06	XIC(148.06Â±500ppm)	603696	259	315	28.0853 min, 3.889 s	0.153	746
1-Methyl-4-(1-pentyn-1-yl)benzene	1.1	143.09	XIC(143.09Â±500ppm)	351860	176	187	28.1686 min, 3.206 s	0.142	736
1-Naphthalenol, 2-methyl-	0.97	158.08	XIC(158.08Â±500ppm)	922293	322	804	28.252 min, 3.519 s	0.109	774
1(3H)-Isobenzofuranone	1.29	105.04	XIC(105.02Â±500ppm)	1836002	462	456	28.252 min, 5.404 s	0.185	915
2,5,6-Trimethylbenzimidazole	1.02	160.09	XIC(160.09Â±500ppm)	5250548	783	2947	28.3353 min, 3.393 s	0.123	770
7-Methylindan-1-one	1.35	146.08	XIC(146.08Â±500ppm)	4888863	1925	1103	28.3353 min, 4.303 s	0.154	842
2-Methyl-6-propylphenol	2.61	121.07	XIC(121.07Â±500ppm)	1006471	356	422	28.4187 min, 3.182 s	0.126	751
2-Methyl-5-hydroxybenzofuran	1.11	148.06	XIC(148.06Â±500ppm)	3686029	538	1209	28.502 min, 3.930 s	0.128	836
Phenol, 2,6-dimethoxy-	1.15	154.07	XIC(154.07Â±500ppm)	26177721	1546	4103	28.5853 min, 4.210 s	0.142	886
Naphthalene, 1,2,3,4-tetrahydro-1,1,6-trimethyl-	1.07	159.12	XIC(159.12Â±500ppm)	6124265	1432	2369	28.752 min, 3.017 s	0.117	901
Eugenol	1.07	164.09	XIC(164.09Â±500ppm)	2347500	711	1255	28.8354 min, 3.452 s	0.119	885
Benzene, heptyl-	1.08	91.06	XIC(91.06Â±500ppm)	2323753	818	401	29.002 min, 2.556 s	0.085	903
Naphthalene, 1,2,3,4-tetrahydro-6,7-dimethyl-	1.17	145.07	XIC(145.07Â±500ppm)	1104418	427	571	29.002 min, 3.480 s	0.114	738
6-Methoxy-3-methylbenzofuran	0.93	162.07	XIC(162.07Â±500ppm)	3187795	513	2045	29.002 min, 3.819 s	0.13	801
1H-Indole, 1,3-dimethyl-	1.08	144.08	XIC(144.08Â±500ppm)	567208	194	268	29.002 min, 4.080 s	0.13	702
Benzene, 1,3,5-trimethyl-2-(1,2-propadienyl)-	1.68	143.09	XIC(143.09Â±500ppm)	775796	241	370	29.0854 min, 3.214 s	0.125	798
Phenol, 3,5-diethyl-	1.06	135.08	XIC(135.08Â±500ppm)	902992	258	287	29.0854 min, 3.323 s	0.116	817
1-Methyl-2-n-hexylbenzene	1.04	105.07	XIC(105.07Â±500ppm)	1676943	553	477	29.2521 min, 2.604 s	0.091	875
Phenol, 2-methoxy-4-propyl-	1.12	137.06	XIC(137.06Â±500ppm)	12679667	3113	3092	29.2521 min, 3.256 s	0.112	874
3(2H)-Benzofuranone, 2,5-dimethyl-	1.15	162.07	XIC(162.07Â±500ppm)	2989000	635	1845	29.2521 min, 3.936 s	0.132	737
Quinoline, 2,7-dimethyl-	1.37	157.09	XIC(157.09Â±500ppm)	1206576	379	576	29.5021 min, 3.780 s	0.132	860
1,2,4-Metheno-1H-cyclobuta[b]cyclopenta[d]furan, 2,2a,3a,4,6a,6b-hexahydro-3a-methyl-	1.18	145.07	XIC(145.07Â±500ppm)	2134079	183	548	29.5021 min, 3.992 s	0.135	712
Hydrocoumarin	1.17	148.05	XIC(148.05Â±500ppm)	604347	329	339	29.8354 min, 5.027 s	0.162	852
1H-Inden-1-one, 2,3-dihydro-3,4,7-trimethyl-	1.16	145.07	XIC(145.07Â±500ppm)	1953219	369	590	29.9188 min, 3.148 s	0.115	738
1H-Indole, 4-methyl-	1.1	130.07	XIC(130.07Â±500ppm)	6180224	693	1489	29.9188 min, 4.506 s	0.144	912
1,12-Tridecadiene	0.66	55.07	XIC(55.07Â±500ppm)	554337	127	120	30.0021 min, 2.031 s	0.071	901
Benzene, 1-(1-methylethenyl)-2-(1-methylethyl)-	1.1	145.07	XIC(145.07Â±500ppm)	992459	146	330	30.0855 min, 4.067 s	0.131	703
Naphthalene, 2-ethyl-	1.06	141.07	XIC(141.07Â±500ppm)	10676595	2368	3507	30.1688 min, 3.615 s	0.118	883
Phenol, 2-(2-pentyn-4-yl)-4-methyl-	1.09	159.09	XIC(159.09Â±500ppm)	1264576	446	673	30.3355 min, 3.195 s	0.116	824
1,1'-Biphenyl, 2-methyl-	1.06	168.1	XIC(168.10Â±500ppm)	2187591	981	1972	30.5022 min, 3.560 s	0.123	913
1-Naphthalenecarboxaldehyde	1.03	156.06	XIC(156.06Â±500ppm)	531894	173	472	30.5022 min, 4.049 s	0.126	708
Vanillin	1.13	151.04	XIC(151.04Â±500ppm)	3987260	2701	1291	30.5022 min, 4.570 s	0.151	913
Naphthalene, 1,7-dimethyl-	1.06	156.1	XIC(156.10Â±500ppm)	16005363	1961	5918	30.5855 min, 3.612 s	0.122	927
Biphenylene	1.11	152.07	XIC(152.07Â±500ppm)	3012518	624	1106	30.5855 min, 4.052 s	0.131	937
Benzene, 1,2,3-trimethoxy-5-methyl-	1.38	167.08	XIC(167.08Â±500ppm)	1610290	401	816	30.9189 min, 3.637 s	0.137	844
Naphthalene, 1,2,3,4-tetrahydro-1,6,8-trimethyl-	1.93	159.09	XIC(159.09Â±500ppm)	4304478	1209	1361	31.0022 min, 3.156 s	0.109	811
1H-Isoindole-1,3(2H)-dione, 2-methyl-	1.43	161.05	XIC(161.05Â±500ppm)	3506665	1131	900	31.4189 min, 4.781 s	0.166	922
Ethanone, 1-(2,3-dihydro-1H-inden-5-yl)-	1.13	145.07	XIC(145.07Â±500ppm)	2054213	211	647	31.8356 min, 4.062 s	0.136	730
4-Hydroxy-1-naphthaldehyde	1	171.05	XIC(171.05Â±500ppm)	1437248	502	1438	32.3356 min, 3.914 s	0.127	852
Acenaphthylene	1.08	152.06	XIC(152.06Â±500ppm)	75969031	2551	9949	32.3356 min, 4.428 s	0.144	965
3,5-Dimethoxy-4-hydroxytoluene	1.11	168.08	XIC(168.08Â±500ppm)	6679999	1304	2481	32.5857 min, 3.933 s	0.129	708
Ethanone, 1-[4-(1,1-dimethylethyl)phenyl]-	1.13	161.07	XIC(161.07Â±500ppm)	977354	240	628	32.669 min, 3.677 s	0.13	749
Benzo[b]thiophene, 3,5-dimethyl-	0.9	161.07	XIC(161.07Â±500ppm)	885643	173	656	32.8357 min, 3.848 s	0.131	727
Dimethyl phthalate	1.3	163.04	XIC(163.04Â±500ppm)	950704	554	540	32.919 min, 4.243 s	0.141	779
Benzene, octyl-	1.06	92.06	XIC(92.06Â±500ppm)	1395400	545	447	33.3357 min, 2.514 s	0.08	915
1H-Inden-1-one, 2,3-dihydro-5,7-dimethyl-	2.57	160.1	XIC(160.10Â±500ppm)	458253	100	287	33.3357 min, 4.138 s	0.125	778
3-Benzofurancarboxaldehyde, 2-methoxy-	1.32	176.09	XIC(176.09Â±500ppm)	1970795	755	1232	33.4191 min, 3.731 s	0.133	769
Benzene, (1-methylheptyl)-	1.21	105.07	XIC(105.07Â±500ppm)	623117	205	214	33.5024 min, 2.567 s	0.085	780
Piperidine, 2-(tetrahydro-2-furanyl)-	1.19	84.05	XIC(84.05Â±500ppm)	1280167	671	649	33.5024 min, 2.643 s	0.087	772
Naphthalene, 2,6-dimethyl-	0.94	156.09	XIC(156.09Â±500ppm)	265086	107	142	33.5024 min, 4.055 s	0.13	721
1H-Inden-1-one, 2,3-dihydro-4,7-dimethyl-	1.28	160.09	XIC(160.09Â±500ppm)	711951	167	382	33.7524 min, 4.176 s	0.133	841
Acenaphthene	1.08	153.07	XIC(153.07Â±500ppm)	3990913	730	1361	33.8358 min, 4.247 s	0.136	935
Benzonitrile, 2,4,6-trimethyl-	1.08	130.07	XIC(130.07Â±500ppm)	1986109	884	888	33.9191 min, 4.333 s	0.137	819
Naphthalene, 1-propyl-	1.16	141.07	XIC(141.07Â±500ppm)	578462	247	315	34.0858 min, 3.476 s	0.113	748
Apocynin	1.12	151.04	XIC(151.04Â±500ppm)	1803747	411	771	34.0858 min, 4.422 s	0.138	870
Cyclopropane, 1-(1-methylethyl)-2-nonyl-	4.16	55.07	XIC(55.07Â±500ppm)	189517	142	42	34.2525 min, 1.963 s	0.132	840
1-Naphthalenecarbonitrile	1.74	153.06	XIC(153.06Â±500ppm)	5834882	1507	1212	34.2525 min, 4.775 s	0.167	929
1,1'-Biphenyl, 4-methyl-	1.08	168.1	XIC(168.10Â±500ppm)	2722953	785	1626	34.3358 min, 3.705 s	0.115	911
Naphthalene, 1,2,3,4-tetrahydro-5,6,7,8-tetramethyl-	1.26	173.1	XIC(173.10Â±500ppm)	247027	181	167	34.4191 min, 3.061 s	0.107	733
Naphthalene, 2-(1-methylethyl)-	1.05	155.09	XIC(155.09Â±500ppm)	372067	128	248	34.5025 min, 3.603 s	0.12	782
Naphthalene, 1,4,5-trimethyl-	1.08	155.09	XIC(155.09Â±500ppm)	2088407	740	1202	34.6692 min, 3.476 s	0.114	860
2-Naphthalenecarboxaldehyde	1.25	127.06	XIC(127.06Â±500ppm)	881002	233	270	34.7525 min, 4.729 s	0.155	791
1-Isopropenylnaphthalene	1.13	153.07	XIC(153.07Â±500ppm)	866843	208	332	34.9192 min, 3.953 s	0.126	704
1H-Indole-2,3-dione, 1-methyl-, 3-hydrazone	1.29	175.07	XIC(175.07Â±500ppm)	488249	266	316	34.9192 min, 4.430 s	0.143	708
Naphthalene, 2,3,6-trimethyl-	1.36	170.11	XIC(170.11Â±500ppm)	1675694	494	1080	35.5026 min, 3.559 s	0.113	900
Dodecanoic acid, methyl ester	1.15	74.04	XIC(74.04Â±500ppm)	281411	125	125	35.7526 min, 2.305 s	0.072	868
Naphthalene, 1,6,7-trimethyl-	1.2	170.11	XIC(170.11Â±500ppm)	1461087	139	1034	35.7526 min, 3.548 s	0.121	762
Homovanillyl alcohol	1.09	137.06	XIC(137.06Â±500ppm)	3261301	910	1451	35.9193 min, 4.290 s	0.137	705
1(2H)-Acenaphthylenone	1.03	168.06	XIC(168.06Â±500ppm)	3164231	516	1524	36.1693 min, 4.424 s	0.136	868
4-Nitroguaiacol	0.44	169.04	XIC(169.04Â±500ppm)	1180579	146	403	36.2526 min, 4.606 s	0.135	810
Decane, 5-propyl-	1.68	57.09	XIC(57.09Â±500ppm)	300827	162	90	36.586 min, 1.850 s	0.067	867
1H-Phenalene	1.12	165.07	XIC(165.07Â±500ppm)	3245570	773	1632	36.9193 min, 4.219 s	0.133	872
1-Naphthalenecarboxaldehyde, 4-methoxy-	0.91	186.07	XIC(186.07Â±500ppm)	598506	211	747	37.086 min, 3.808 s	0.123	757
Dodecanoic acid	1.1	73.04	XIC(73.04Â±500ppm)	451002	135	161	37.2527 min, 2.357 s	0.069	811
Benzene, nonyl-	1.07	92.06	XIC(92.06Â±500ppm)	809737	359	269	37.4194 min, 2.483 s	0.079	911
Fluorene	1.16	166.08	XIC(166.08Â±500ppm)	14295663	3849	4915	37.6694 min, 4.235 s	0.134	921
1-Propanone, 1-(4-hydroxy-3-methoxyphenyl)-	1.34	151.04	XIC(151.04Â±500ppm)	577031	214	393	37.9194 min, 4.129 s	0.138	747
9H-Fluorene, 9-methyl-	1.12	165.07	XIC(165.07Â±500ppm)	1284503	470	819	38.5028 min, 4.015 s	0.132	877
(E)-2,6-Dimethoxy-4-(prop-1-en-1-yl)phenol	1.17	194.1	XIC(194.10Â±500ppm)	366448	234	309	38.7528 min, 3.767 s	0.119	807
Dibenzofuran, 4-methyl-	1.06	182.08	XIC(182.08Â±500ppm)	3926971	702	2320	39.1695 min, 3.943 s	0.123	894
6H-Dibenzo[b,d]-pyran	1.1	182.08	XIC(182.08Â±500ppm)	5320553	968	2646	39.5862 min, 3.961 s	0.126	899
Cyclopentane, undecyl-	1.17	69.08	XIC(69.08Â±500ppm)	293483	107	103	40.5863 min, 2.068 s	0.065	753
2,3-Dihydro-1-oxo-1H-phenalene	1.05	182.08	XIC(182.08Â±500ppm)	457313	143	349	40.5863 min, 4.183 s	0.136	819
[1,1'-Biphenyl]-4-carboxaldehyde	0.98	182.08	XIC(182.08Â±500ppm)	913985	170	553	40.753 min, 4.240 s	0.129	862
Hexadecane, 3-methyl-	0.86	57.09	XIC(57.09Â±500ppm)	276359	123	112	41.253 min, 1.864 s	0.062	876
1,4,5,8-Tetramethylnaphthalene	1.24	169.1	XIC(169.10Â±500ppm)	200384	111	151	41.5864 min, 3.615 s	0.116	765
cis-2-Methyl-7-octadecene	1.06	56.08	XIC(56.08Â±500ppm)	279686	104	84	41.8364 min, 1.940 s	0.06	876
9H-Fluorene, 4-methyl-	0.94	165.07	XIC(165.07Â±500ppm)	2810468	988	1036	41.9197 min, 4.073 s	0.169	906
Dodecyl acrylate	1.13	55.05	XIC(55.05Â±500ppm)	293068	106	79	42.0864 min, 2.295 s	0.073	892
9H-Fluorene, 2-methyl-	1.05	165.08	XIC(165.08Â±500ppm)	1199199	262	581	42.5865 min, 4.235 s	0.133	897
Tridecanoic acid, methyl ester	1.29	74.04	XIC(74.04Â±500ppm)	194167	119	88	43.1698 min, 2.259 s	0.068	735
Naphtho[2,1-b]furan, 1,2-dimethyl-	1.05	196.09	XIC(196.09Â±500ppm)	449864	194	394	43.2532 min, 3.791 s	0.11	767
9H-Fluoren-9-one	1.38	180.06	XIC(180.05Â±500ppm)	1147417	563	541	43.2532 min, 4.866 s	0.16	932
1-Dodecanol, 3,7,11-trimethyl-	1.23	57.09	XIC(57.09Â±500ppm)	1684756	441	428	43.4199 min, 1.865 s	0.063	870
Anthracene	1.2	178.08	XIC(178.08Â±500ppm)	18845747	4353	5185	44.67 min, 4.775 s	0.152	937
9-Eicosene, (E)-	1.16	55.07	XIC(55.07Â±500ppm)	723307	297	171	45.17 min, 1.955 s	0.06	917
Hexadecane, 2,6,10,14-tetramethyl-	1.82	57.09	XIC(57.09Â±500ppm)	978560	251	264	46.0867 min, 1.811 s	0.075	908
9H-Carbazole-9-methanol	1.13	167.08	XIC(167.08Â±500ppm)	1033841	253	691	46.7535 min, 5.280 s	0.149	878
Anthracene, 2-methyl-	1.11	192.1	XIC(192.10Â±500ppm)	465343	280	423	48.5869 min, 4.464 s	0.14	921
Anthracene, 1-methyl-	1.17	192.1	XIC(192.10Â±500ppm)	582046	174	492	48.7536 min, 4.534 s	0.14	910
4H-Cyclopenta[def]phenanthrene	1.15	190.08	XIC(190.08Â±500ppm)	488775	391	500	49.2537 min, 4.858 s	0.154	917
1,2-Benzenedicarboxylic acid, butyl 2-ethylhexyl ester	1.11	149.03	XIC(149.03Â±500ppm)	13179727	2079	4360	49.587 min, 3.284 s	0.109	901
Phthalic acid, isobutyl octyl ester	1.16	149.03	XIC(149.03Â±500ppm)	3612579	1185	2107	50.2537 min, 3.140 s	0.108	801
Dibutyl phthalate	1.1	149.03	XIC(149.03Â±500ppm)	9527357	1848	2992	51.0871 min, 3.333 s	0.108	915
1,2-Benzenedicarboxylic acid, butyl octyl ester	1.14	149.03	XIC(149.03Â±500ppm)	4968286	2494	3120	51.7539 min, 3.187 s	0.109	858
5-Eicosene, (E)-	1.03	70.09	XIC(70.09Â±500ppm)	703405	267	214	51.9205 min, 1.939 s	0.058	847
Phthalic acid, di(2-methylbutyl) ester	1.09	149.03	XIC(149.03Â±500ppm)	460158	259	492	52.4206 min, 3.059 s	0.102	775
2-Methyl-2-decanol	0.52	59.06	XIC(59.06Â±500ppm)	5331136	349	1701	53.3373 min, 2.110 s	0.065	837
Fluoranthene	1.19	202.08	XIC(202.08Â±500ppm)	974029	686	582	53.6707 min, 5.053 s	0.157	935
Cyclopentane, heneicosyl-	1	69.08	XIC(69.08Â±500ppm)	875520	234	238	54.3374 min, 2.045 s	0.061	882

## Sheet: Azadirachta indica (SPE10)
Name	Tailing.Factor	Base.Mass	Quant.Masses	Area	Peak.S.N	Quant.S.N	R.T...min.	FWHH..s.	Similarity
Pyrazine	1.34	80.04	XIC(80.04Â±500ppm)	120045099	5770	12145	3.75002 min, 2.125 s	0.116	954
Thioacetic acid	0.96	43.11	XIC(43.11Â±500ppm)	35163273	326	1712	3.75002 min, 6.395 s	0.026	785
Propanoic acid, 2-hydroxy-, ethyl ester	1.31	45.05	XIC(45.05Â±500ppm)	21646511	410	401	3.83336 min, 1.867 s	0.105	857
1,4-Cyclohexadiene, 1-methyl-	1.18	79.06	XIC(79.06Â±500ppm)	2656852	542	417	3.9167 min, 1.644 s	0.094	842
2-Hexanone, 4-hydroxy-5-methyl-3-propyl-	1.98	43.03	XIC(43.03Â±500ppm)	28848216	510	655	3.9167 min, 1.739 s	0.107	773
3-Penten-2-one	1.29	69.04	XIC(69.04Â±500ppm)	53476828	2006	5133	3.9167 min, 1.955 s	0.096	861
Pyridine	2.25	79.04	XIC(79.03Â±500ppm)	89062663	6230	3822	4.00004 min, 2.129 s	0.139	946
N-Acetylethylenediamine	0.96	43.07	XIC(43.07Â±500ppm)	29332298	303	1073	4.08338 min, 1.683 s	0.122	741
2-Propanol, 1-ethoxy-	0.53	45.05	XIC(45.05Â±500ppm)	16822670	913	487	4.08338 min, 1.762 s	0.101	748
Furan, 3-methyl-	1.72	53.06	XIC(53.06Â±500ppm)	14617037	1766	1892	4.08338 min, 2.089 s	0.095	831
1-Penten-3-one	1.29	55.03	XIC(55.03Â±500ppm)	47122612	2790	3487	4.08338 min, 2.176 s	0.105	774
2-Pentenal, (E)-	0.67	55.07	XIC(55.07Â±500ppm)	8986035	354	1353	4.16672 min, 2.010 s	0.083	816
Pyrrole	1.17	67.05	XIC(67.05Â±500ppm)	71765304	4988	8143	4.16672 min, 2.137 s	0.107	862
2-Butenoic acid, methyl ester	1.26	69.04	XIC(69.04Â±500ppm)	11085981	1300	1864	4.3334 min, 1.942 s	0.098	885
N-tert-Butylethylamine	1.16	86.04	XIC(86.04Â±500ppm)	36809725	3036	4882	4.3334 min, 2.410 s	0.119	827
1-Hydroxy-2-butanone	1.52	57.05	XIC(57.05Â±500ppm)	174837923	4248	7379	4.41674 min, 2.197 s	0.125	934
Sulfurous acid, 2-pentyl pentyl ester	0.92	71.06	XIC(71.06Â±500ppm)	8029913	881	1637	4.50008 min, 1.806 s	0.114	756
4-Hexen-3-one	1.24	69.04	XIC(69.04Â±500ppm)	4205229	643	831	4.50008 min, 1.898 s	0.107	725
Acetamide	2.05	59.05	XIC(59.05Â±500ppm)	19025168	3742	2002	4.50008 min, 2.693 s	0.144	957
2(5H)-Furanone	1.26	55.04	XIC(55.04Â±500ppm)	6655206	1383	450	4.58342 min, 2.569 s	0.116	834
Pentane, 2,2,4-trimethyl-4-nitro-	8.75	57.05	XIC(57.05Â±500ppm)	11128544	1088	902	4.66676 min, 1.582 s	0.117	751
Butanoic acid, 2-methyl-, methyl ester	2.06	57.08	XIC(57.08Â±500ppm)	19275403	1123	2217	4.66676 min, 1.793 s	0.129	864
Butanoic acid	1.23	60.03	XIC(60.03Â±500ppm)	58931344	2634	2055	4.7501 min, 1.798 s	0.095	907
2-Butene-1,4-diol, (Z)-	1.26	42.06	XIC(42.06Â±500ppm)	22376583	767	485	4.7501 min, 2.152 s	0.118	788
3-Hexanone	1.19	43.07	XIC(43.07Â±500ppm)	53776194	3000	1846	4.83344 min, 1.922 s	0.11	944
Furan, 2,3-dihydro-4-methyl-	1.19	84.06	XIC(84.06Â±500ppm)	5227480	796	1231	4.83344 min, 2.230 s	0.112	831
1-Octene	1.34	55.07	XIC(55.07Â±500ppm)	8338246	1049	802	4.91678 min, 1.574 s	0.091	862
Butanoic acid, 2-oxo-, ethyl ester	4.17	57.09	XIC(57.09Â±500ppm)	8366893	288	1455	4.91678 min, 1.727 s	0.124	728
Cyclopentanone	1.16	55.04	XIC(55.04Â±500ppm)	122543996	4482	5231	4.91678 min, 2.434 s	0.131	919
Crotonic acid	0.69	41.06	XIC(41.06Â±500ppm)	9262299	114	348	5.00012 min, 1.916 s	0.207	760
Propanenitrile, 3,3'-oxybis-	1.33	84.02	XIC(84.02Â±500ppm)	185041366	2419	12425	5.08346 min, 2.835 s	0.148	767
Pyridine, 2-methyl-	2.49	93.06	XIC(93.06Â±500ppm)	43239800	3166	2987	5.75018 min, 2.367 s	0.155	915
Methyl valerate	1.64	74.04	XIC(74.04Â±500ppm)	13377179	1195	1581	5.83352 min, 1.994 s	0.109	788
2-Butenoic acid, (E)-	0.58	41.06	XIC(41.06Â±500ppm)	26417651	1354	681	5.83352 min, 2.041 s	0.103	807
anti-2-Acetoxyacetaldoxime	0.22	43.04	XIC(43.04Â±500ppm)	16267817	656	532	5.83352 min, 2.388 s	0.122	701
Pyrazine, methyl-	1.66	94.05	XIC(94.05Â±500ppm)	133888604	5792	9262	5.83352 min, 2.534 s	0.149	932
2-Amino-4-methyl-oxazole	1.02	42.05	XIC(42.05Â±500ppm)	4128558	444	100	5.91686 min, 2.560 s	0.136	753
Cyclopentane, propyl-	0.79	69.08	XIC(69.08Â±500ppm)	2382998	234	374	6.0002 min, 1.707 s	0.124	855
2-Furanmethanol, tetrahydro-	1.81	71.06	XIC(71.06Â±500ppm)	47096496	870	4454	6.0002 min, 2.621 s	0.147	832
2-Hydroxy-2,5-dimethyl-hept-6-en-3-one	1.39	59.06	XIC(59.06Â±500ppm)	5791665	1496	1521	6.08354 min, 2.206 s	0.148	729
2-Cyclopenten-1-one	1.58	82.04	XIC(82.04Â±500ppm)	270933884	10120	14874	6.08354 min, 3.055 s	0.171	851
3-Hepten-1-ol, (E)-	0.89	55.06	XIC(55.06Â±500ppm)	30754446	1248	3040	6.33356 min, 2.467 s	0.242	704
N-Methyl-N'-nitroguanidine	0.29	43.04	XIC(43.04Â±500ppm)	18440650	284	439	6.33356 min, 2.846 s	0.153	754
3-Pentenoic acid, methyl ester	6.16	55.08	XIC(55.08Â±500ppm)	3245026	404	468	6.4169 min, 2.211 s	0.109	778
1,3-Cyclohexadiene, 5,6-dimethyl-	1.07	93.07	XIC(93.07Â±500ppm)	740235	230	259	6.50024 min, 1.917 s	0.114	786
2-Butenoic acid, ethyl ester, (E)-	5.4	69.04	XIC(69.04Â±500ppm)	3018974	421	516	6.50024 min, 2.225 s	0.118	767
(R)-(+)-3-Methylcyclopentanone	1.05	69.04	XIC(69.04Â±500ppm)	9089797	861	1164	6.50024 min, 2.593 s	0.161	861
1,2-Ethanediol, monoacetate	1.28	43.03	XIC(43.03Â±500ppm)	98231526	6800	1973	6.66692 min, 2.708 s	0.142	950
Butanoic acid, 3-methyl-, ethyl ester	1.38	88.05	XIC(88.05Â±500ppm)	82944169	5375	8285	6.75026 min, 1.998 s	0.156	927
2-Furanmethanol	1.26	98.03	XIC(98.03Â±500ppm)	171624151	5181	8586	6.8336 min, 2.677 s	0.155	893
Furan, 2,3-dihydro-2,5-dimethyl-	1.17	43.04	XIC(43.04Â±500ppm)	9770014	480	272	6.91694 min, 3.266 s	0.144	721
Pyridine, 3-methyl-	3.28	93.06	XIC(93.06Â±500ppm)	29793861	1561	1775	7.08362 min, 2.709 s	0.168	885
2-Butenoic acid, 2-methyl-, methyl ester	1.17	55.07	XIC(55.07Â±500ppm)	2857478	295	346	7.16696 min, 2.306 s	0.125	856
Furan, 2-ethyl-	1.41	81.04	XIC(81.04Â±500ppm)	16578763	1884	1382	7.2503 min, 2.931 s	0.171	796
4-Pentenoic acid	0.76	55.07	XIC(55.07Â±500ppm)	3446137	222	314	7.58366 min, 2.078 s	0.118	716
1,4-Hexadiene, 2-methyl-	1.26	81.04	XIC(81.04Â±500ppm)	9809051	968	1084	7.58366 min, 2.965 s	0.155	807
4-Cyclopentene-1,3-dione	1.12	96.02	XIC(96.02Â±500ppm)	16528377	2742	2050	7.58366 min, 3.948 s	0.167	922
Pentanoic acid	1.27	60.03	XIC(60.03Â±500ppm)	6659968	1026	702	7.75034 min, 2.061 s	0.104	902
2H-Pyran-3(4H)-one, dihydro-	2.69	42.05	XIC(42.05Â±500ppm)	15281445	2660	544	7.75034 min, 3.201 s	0.162	872
Cyclohexane, 1-ethyl-2-methyl-, cis-	1.24	55.07	XIC(55.07Â±500ppm)	6706232	530	490	7.83368 min, 1.795 s	0.145	741
o-Xylene	1.24	91.06	XIC(91.06Â±500ppm)	2634331	258	347	7.83368 min, 2.152 s	0.117	822
2-Butenal, 2-ethenyl-	1.01	96.06	XIC(96.06Â±500ppm)	3639350	440	694	8.00036 min, 2.989 s	0.211	747
Methyl 1-methylcyclopropyl ketone	6.01	43.03	XIC(43.03Â±500ppm)	1782909	169	99	8.25038 min, 2.418 s	0.127	727
Pentanoic acid, ethyl ester	1.3	88.05	XIC(88.05Â±500ppm)	32464863	5081	4219	8.41706 min, 2.163 s	0.119	936
1-Penten-3-one, 2,4-dimethyl-	1.13	69.05	XIC(69.05Â±500ppm)	3684225	480	520	8.41706 min, 2.898 s	0.142	750
Glutaraldehyde	1.11	44.04	XIC(44.04Â±500ppm)	8764376	271	141	8.41706 min, 3.357 s	0.195	727
Ethanone, 1-(2-furanyl)-	1.22	95.01	XIC(95.01Â±500ppm)	9101560	1422	2024	8.5004 min, 3.068 s	0.146	871
3,5-Dimethylpyrazole	1.18	96.02	XIC(96.02Â±500ppm)	1784523	443	342	8.83376 min, 2.371 s	0.104	702
Methyl acetoxyacetate	1.46	43.03	XIC(43.03Â±500ppm)	46873535	1216	1536	8.83376 min, 2.981 s	0.169	932
2H-Tetrazole, 2,5-dimethyl-	1.09	42.03	XIC(42.03Â±500ppm)	9791382	422	206	8.83376 min, 3.713 s	0.156	774
Butanoic acid, 4-hydroxy-	1.31	42.06	XIC(42.06Â±500ppm)	209485739	6440	3175	8.83376 min, 4.485 s	0.199	930
Pyrazine, ethyl-	1.83	107.06	XIC(107.06Â±500ppm)	49378293	2275	3621	8.9171 min, 2.879 s	0.159	921
1,3-Butadiene-1-carboxylic acid	1.23	42.05	XIC(42.05Â±500ppm)	6760257	940	155	9.00044 min, 3.696 s	0.164	743
1,4-Cyclohex-2-enedione	2.13	82.02	XIC(82.02Â±500ppm)	4642311	413	674	9.00044 min, 3.745 s	0.296	777
Pyrazine, 2,3-dimethyl-	1.92	67.05	XIC(67.05Â±500ppm)	4102607	495	638	9.08378 min, 2.956 s	0.186	886
p-Benzoquinone	0.62	54.03	XIC(54.03Â±500ppm)	6699490	293	809	9.08378 min, 3.869 s	0.16	922
Bicyclo[2.2.1]heptane, 2-ethyl-	1.12	67.07	XIC(67.07Â±500ppm)	9774776	1139	908	9.16712 min, 2.031 s	0.158	889
2-Butenoic acid, 2-methyl-	0.26	55.07	XIC(55.07Â±500ppm)	3575805	710	321	9.16712 min, 2.349 s	0.113	888
Cyclopentanone, 3,4-bis(methylene)-	1.34	79.06	XIC(79.06Â±500ppm)	3373651	484	387	9.25046 min, 3.022 s	0.177	766
2-Cyclopenten-1-one, 2-hydroxy-	1.26	98.04	XIC(98.04Â±500ppm)	38596798	1956	4212	9.25046 min, 3.368 s	0.143	901
Hexanoic acid, methyl ester	1.48	74.04	XIC(74.04Â±500ppm)	1934698	261	242	9.41714 min, 2.243 s	0.111	730
Cyclohexane, propyl-	1.13	83.09	XIC(83.09Â±500ppm)	2479901	573	732	9.50048 min, 1.924 s	0.117	930
Pyrazine, ethenyl-	1.49	106.05	XIC(106.05Â±500ppm)	2638196	574	756	9.50048 min, 3.158 s	0.151	743
2,5-Hexanedione	1.18	43.04	XIC(43.04Â±500ppm)	32599174	1801	1066	9.50048 min, 3.467 s	0.179	836
2-Cyclohexen-1-one	1.26	68.04	XIC(68.04Â±500ppm)	26898494	1318	2561	9.58382 min, 3.547 s	0.179	850
Octane, 2,6-dimethyl-	2.53	57.09	XIC(57.09Â±500ppm)	3062063	573	476	9.66716 min, 1.691 s	0.112	833
Cyclopentane, butyl-	0.48	69.08	XIC(69.08Â±500ppm)	1357842	178	238	9.66716 min, 1.889 s	0.104	871
Pyridine, 3,4-dimethyl-	2.96	107.07	XIC(107.07Â±500ppm)	12154730	783	1326	9.7505 min, 2.801 s	0.171	891
2-Cyclopenten-1-one, 3,4-dimethyl-	1.22	67.07	XIC(67.07Â±500ppm)	16264152	1842	1618	9.83384 min, 2.973 s	0.161	851
N-Methylmaleimide	1.17	54.03	XIC(54.03Â±500ppm)	2544934	412	472	9.83384 min, 3.893 s	0.18	806
Pentanoic acid, 2-methyl-, ethyl ester	1.09	43.07	XIC(43.07Â±500ppm)	654882	294	41	10.0005 min, 2.134 s	0.135	794
2(5H)-Furanone, 5-methyl-	1.19	55.04	XIC(55.04Â±500ppm)	38689966	4964	2407	10.0005 min, 4.118 s	0.179	875
Pyridine, 2,3-dimethyl-	2.5	107.07	XIC(107.07Â±500ppm)	3333538	378	758	10.2505 min, 2.933 s	0.176	782
2(3H)-Furanone, dihydro-5-methyl-	1.24	56.06	XIC(56.06Â±500ppm)	4569291	2031	509	10.5839 min, 4.151 s	0.187	935
Octane, 2,2,6-trimethyl-	1.05	57.09	XIC(57.09Â±500ppm)	4730729	533	704	10.8339 min, 1.714 s	0.118	829
3-Pentenoic acid, 4-methyl-, methyl ester	0.97	69.04	XIC(69.04Â±500ppm)	4286219	328	730	10.8339 min, 3.238 s	0.155	782
2,3-Pentanedione	1.08	57.05	XIC(57.05Â±500ppm)	55168443	2482	6803	11.0006 min, 3.229 s	0.144	801
2-Butanone, 1-(acetyloxy)-	1.4	43.03	XIC(43.03Â±500ppm)	49787958	2617	1639	11.1673 min, 3.230 s	0.145	915
2,3-Dimethyl-4-hydroxy-2-butenoic lactone	1.04	55.04	XIC(55.04Â±500ppm)	5535523	436	655	11.2506 min, 3.357 s	0.135	733
2H-Pyran-2-one	1.34	68.04	XIC(68.04Â±500ppm)	15931538	3454	1989	11.2506 min, 4.519 s	0.18	830
2-Acetyl-5-methylfuran	2.81	109.03	XIC(109.03Â±500ppm)	2857709	396	1033	11.334 min, 3.125 s	0.155	783
Methyl 2-furoate	1.18	95.01	XIC(95.01Â±500ppm)	64235609	5453	8639	11.5006 min, 3.396 s	0.153	915
4(3H)-Pyrimidinone, 3-methyl-	1.13	110.04	XIC(110.04Â±500ppm)	42273118	4691	4811	11.584 min, 4.192 s	0.168	715
4-Methyl-5H-furan-2-one	1.08	41.06	XIC(41.06Â±500ppm)	41903751	4713	1806	11.584 min, 4.410 s	0.184	829
Cyclopentane, pentylidene-	1.88	95.09	XIC(95.09Â±500ppm)	2496726	210	370	11.9173 min, 2.102 s	0.165	754
1H-Indene, octahydro-	0.38	81.07	XIC(81.07Â±500ppm)	2117172	257	450	11.9173 min, 2.299 s	0.135	849
2-Hydroxy-gamma-butyrolactone	1.19	57.06	XIC(57.06Â±500ppm)	5046729	1408	784	12.0007 min, 4.862 s	0.188	892
Ether, hexyl pentyl	1.26	71.09	XIC(71.09Â±500ppm)	1742216	510	574	12.084 min, 1.771 s	0.147	802
Bicyclo[2.2.1]heptane, 2-(1-methylpropyl)-	0.97	95.09	XIC(95.09Â±500ppm)	7315087	897	892	12.084 min, 2.119 s	0.135	793
Pentanoic acid, 4-oxo-, methyl ester	1.13	43.04	XIC(43.04Â±500ppm)	16606502	968	468	12.084 min, 3.495 s	0.167	856
N'-(Diaminomethylidene)formohydrazide	1.19	84.05	XIC(84.05Â±500ppm)	10812102	750	1591	12.2507 min, 3.507 s	0.157	719
(Z)-5-Decene	1.66	55.07	XIC(55.07Â±500ppm)	1805973	210	201	12.334 min, 1.856 s	0.094	875
Benzofuran	1.1	118.04	XIC(118.04Â±500ppm)	11222005	1045	4035	12.334 min, 3.212 s	0.143	931
Tetracyclo[3.3.1.0(2,8).0(4,6)]-non-2-ene	0.51	44.01	XIC(44.01Â±500ppm)	1564623	247	26	12.4174 min, 2.764 s	0.121	778
2-Furanmethanol, acetate	2.77	81.04	XIC(81.04Â±500ppm)	3988722	821	833	12.4174 min, 3.145 s	0.142	895
cis-4-Decene	1.6	41.06	XIC(41.06Â±500ppm)	2141942	233	133	12.5007 min, 1.862 s	0.251	811
1,2-Ethanediol, diacetate	1.43	43.04	XIC(43.04Â±500ppm)	4092851	169	193	12.5007 min, 3.132 s	0.142	741
2-Thiophenecarboxaldehyde	1.1	110.99	XIC(110.99Â±500ppm)	2285303	371	730	12.5007 min, 4.159 s	0.155	787
Pyridine, 3-methoxy-	2.71	109.05	XIC(109.05Â±500ppm)	17375026	1357	1241	12.5841 min, 3.615 s	0.171	892
2-Furanone, 2,5-dihydro-3,5-dimethyl	1.24	69.04	XIC(69.04Â±500ppm)	35606532	2068	2920	12.5841 min, 3.935 s	0.175	837
1H-Pyrrole-2-carboxaldehyde, 1-methyl-	0.66	109.05	XIC(109.05Â±500ppm)	3989798	841	637	12.7507 min, 3.814 s	0.177	841
3-Decene	1.12	55.07	XIC(55.07Â±500ppm)	1228851	136	158	12.8341 min, 1.870 s	0.089	794
Ethanol, 2-(2-ethoxyethoxy)-	1.19	45.05	XIC(45.05Â±500ppm)	10082826	625	397	12.8341 min, 2.973 s	0.129	907
Propanoic acid, 2-methyl-, anhydride	1.35	71.05	XIC(71.05Â±500ppm)	81379247	1223	5375	12.8341 min, 3.484 s	0.175	799
3-Pyridinecarbonitrile	1.88	104.04	XIC(104.04Â±500ppm)	2543924	598	594	12.8341 min, 4.178 s	0.17	920
1-Propanone, 1-(2-furanyl)-	1.38	95.01	XIC(95.01Â±500ppm)	11582298	1934	1956	12.9174 min, 3.364 s	0.146	919
1H-Pyrrole-2-carboxaldehyde	1.24	95.04	XIC(95.04Â±500ppm)	9964458	1693	1398	12.9174 min, 3.920 s	0.151	899
3,4,5,6-Tetrahydrophthalic anhydride	1.19	79.06	XIC(79.06Â±500ppm)	2711008	546	324	13.0841 min, 3.838 s	0.171	779
p-Benzoquinone, 2-methyl-	1.01	54.03	XIC(54.03Â±500ppm)	2055417	314	385	13.0841 min, 3.987 s	0.146	892
2,3-Epoxybutane	1.08	43.05	XIC(43.05Â±500ppm)	13156757	1362	543	13.0841 min, 4.372 s	0.199	813
Cyclodecene	1.13	67.07	XIC(67.07Â±500ppm)	2191533	236	259	13.3341 min, 2.148 s	0.121	838
5,6,7,8-Tetrahydroindolizine	3.22	120.08	XIC(120.08Â±500ppm)	467008	124	216	13.3341 min, 3.010 s	0.174	716
Benzene, 1-methoxy-4-methyl-	1.1	122.07	XIC(122.07Â±500ppm)	20972147	2041	5915	13.4175 min, 3.029 s	0.133	927
2-Propen-1-amine	1.25	56.08	XIC(56.08Â±500ppm)	7305441	440	1302	13.5841 min, 1.713 s	0.117	762
Benzene, 2-propenyl-	1.05	117.07	XIC(117.07Â±500ppm)	1469473	439	683	13.6675 min, 2.883 s	0.121	896
2-Cyclopenten-1-one, 3,4,5-trimethyl-	1.3	81.08	XIC(81.08Â±500ppm)	1822515	897	345	13.6675 min, 3.060 s	0.157	795
1,2-Cyclopentanedione, 3-methyl-	1.14	112.05	XIC(112.05Â±500ppm)	34567110	1580	3272	13.6675 min, 3.587 s	0.142	913
Limonene	1.12	68.07	XIC(68.07Â±500ppm)	4235386	693	678	13.8342 min, 2.269 s	0.113	889
Benzene, 1-ethyl-4-methoxy-	0.91	121.03	XIC(121.03Â±500ppm)	1517398	225	634	13.9175 min, 3.189 s	0.134	737
1-Methylcyclooctene	1.23	96.06	XIC(96.06Â±500ppm)	2374270	356	515	14.0008 min, 3.100 s	0.155	735
Benzenemethanol, a-(1-aminoethyl)-, [R-(R*,R*)]-	1.75	44	XIC(44.00Â±500ppm)	4148848	110	90	14.0008 min, 3.664 s	0.05	723
Octane, 6-ethyl-2-methyl-	1.25	57.08	XIC(57.08Â±500ppm)	75580295	7514	6869	14.0842 min, 1.777 s	0.135	846
Benzyl alcohol	1.14	79.06	XIC(79.06Â±500ppm)	3135249	810	377	14.0842 min, 3.627 s	0.191	774
2-Decen-1-ol, (E)-	1.31	57.09	XIC(57.09Â±500ppm)	687165	122	147	14.1675 min, 2.268 s	0.111	775
(2-Aziridinylethyl)amine	2.14	44	XIC(44.00Â±500ppm)	3096672	107	78	14.2509 min, 3.664 s	0.052	813
4-Oxohex-2-enal	1.21	83.04	XIC(83.04Â±500ppm)	5577381	742	1402	14.2509 min, 4.252 s	0.168	855
2,5-Furandione, 3,4-dimethyl-	1.08	54.07	XIC(54.07Â±500ppm)	3051760	359	503	14.3342 min, 4.101 s	0.146	863
3-Methylphenylacetylene	1.08	115.05	XIC(115.05Â±500ppm)	11103099	1005	2506	14.4175 min, 3.300 s	0.14	922
Benzaldehyde, 2-hydroxy-	1.66	44	XIC(44.00Â±500ppm)	3326947	149	79	14.4175 min, 3.663 s	0.051	820
2,5-Furandicarboxaldehyde	1.33	123.05	XIC(123.05Â±500ppm)	1359626	374	642	14.5009 min, 3.495 s	0.151	757
Decane, 5,6-dimethyl-	1.34	43.07	XIC(43.07Â±500ppm)	20522403	2320	741	14.5842 min, 1.745 s	0.113	869
2H-Pyran-2-one, tetrahydro-	1.29	42.03	XIC(42.03Â±500ppm)	22855227	1537	493	14.9176 min, 5.240 s	0.218	886
2-Cyclopenten-1-one, 3-ethyl-2-hydroxy-	2.01	43.05	XIC(43.05Â±500ppm)	2912229	226	166	15.0009 min, 3.256 s	0.157	735
2-Cyclohexen-1-one, 3-methyl-	1.32	82.05	XIC(82.05Â±500ppm)	2893268	576	538	15.0009 min, 3.882 s	0.171	828
Sulfurous acid, nonyl pentyl ester	1.42	43.07	XIC(43.07Â±500ppm)	15941826	1365	1052	15.0843 min, 1.775 s	0.152	735
Ethanone, 1-(1H-pyrrol-2-yl)-	1.21	94.03	XIC(94.03Â±500ppm)	3432547	1225	541	15.2509 min, 3.958 s	0.151	873
cis-Decalin, 2-syn-methyl-	0.4	81.07	XIC(81.07Â±500ppm)	664203	123	165	15.3343 min, 2.125 s	0.129	745
Benzene, propoxy-	1.06	94.04	XIC(94.04Â±500ppm)	3079012	491	474	15.3343 min, 3.427 s	0.139	783
2,3,5-Trimethylcyclopent-2-enone	1.4	109.07	XIC(109.07Â±500ppm)	6084472	1138	1315	15.4176 min, 3.249 s	0.159	832
Oxirane, phenyl-	1.11	104.06	XIC(104.06Â±500ppm)	2561070	740	571	15.4176 min, 3.646 s	0.163	738
2-Furancarboxamide, N-methyl-N-isobutyl-	1.11	95.01	XIC(95.01Â±500ppm)	5387593	1359	1371	15.4176 min, 3.917 s	0.152	730
Bicyclo[3.2.0]hept-3-en-2-one	1.13	79.06	XIC(79.06Â±500ppm)	2626138	203	241	15.4176 min, 4.076 s	0.144	795
2,3-Butanediol, diacetate	1.33	43.04	XIC(43.04Â±500ppm)	11710699	1195	581	15.501 min, 2.727 s	0.183	878
Benzaldehyde, 2-methyl-	1.31	91.06	XIC(91.06Â±500ppm)	18058474	2051	1211	15.5843 min, 3.619 s	0.15	914
1,6:2,3-Dianhydro-4-deoxy-ÃŸ-d-ribo-hexopyranose	1.16	81.04	XIC(81.04Â±500ppm)	3237038	973	658	15.6676 min, 4.077 s	0.179	713
2-Oxepanone	1.06	42.06	XIC(42.06Â±500ppm)	4120932	434	147	15.6676 min, 5.334 s	0.172	707
Cyclohexanone, 3-ethenyl-	1.12	124.05	XIC(124.05Â±500ppm)	1577478	809	550	15.751 min, 4.068 s	0.152	789
2-Cyclopenten-1-one, 2-hydroxy-3,4-dimethyl-	1.38	55.07	XIC(55.07Â±500ppm)	586572	145	70	15.9177 min, 3.374 s	0.138	741
2-Cyclopenten-1-one, 3-ethyl-	1.48	81.04	XIC(81.04Â±500ppm)	9249618	1839	1156	15.9177 min, 3.848 s	0.156	842
Decane, 2,3,4-trimethyl-	1.13	71.09	XIC(71.09Â±500ppm)	122427254	5771	13176	16.001 min, 1.803 s	0.12	862
Heptanoic acid	1.27	60.04	XIC(60.04Â±500ppm)	1631606	440	304	16.0843 min, 2.352 s	0.095	747
Phenol, 3-methyl-	1.24	108.05	XIC(108.05Â±500ppm)	154326081	4626	5296	16.0843 min, 3.221 s	0.135	939
Benzofuran, 2,3-dihydro-	1.02	120.06	XIC(120.06Â±500ppm)	10665540	954	2411	16.0843 min, 3.761 s	0.143	801
1-Cyclohexyl-1-(4-methylcyclohexyl)ethane	0.4	55.07	XIC(55.07Â±500ppm)	1096818	144	162	16.1677 min, 2.042 s	0.11	732
1H-Indene, 2,3-dihydro-2-methyl-	1.06	117.07	XIC(117.07Â±500ppm)	6506562	1032	2330	16.1677 min, 2.886 s	0.129	881
1,2,4-Triazin-3-amine, 5,6-dimethyl-	1.16	124.05	XIC(124.05Â±500ppm)	8208208	1041	2052	16.251 min, 4.146 s	0.163	720
4,5-Nonadiene	1.4	96.06	XIC(96.06Â±500ppm)	2266932	370	456	16.501 min, 3.419 s	0.158	748
Hexanoic acid, 4-oxo-, methyl ester	0.93	57.05	XIC(57.05Â±500ppm)	720574	146	136	16.501 min, 3.478 s	0.129	798
6-Hydroxy-2,6-dihydropyran-3-one	1.03	84.03	XIC(84.03Â±500ppm)	1304653	357	414	16.501 min, 4.069 s	0.146	742
Pentane, 2,2,4-trimethyl-	1.33	57.09	XIC(57.09Â±500ppm)	61580813	5154	6940	16.5844 min, 1.797 s	0.136	777
Benzene, 1-methyl-3-(1-methylethenyl)-	1.06	117.07	XIC(117.07Â±500ppm)	1469658	446	520	16.5844 min, 2.844 s	0.121	887
Phenol, 2-methoxy-	1.17	109.03	XIC(109.03Â±500ppm)	205639029	4349	6162	16.5844 min, 3.610 s	0.151	910
Benzonitrile, 3-methyl-	1.47	117.06	XIC(117.06Â±500ppm)	6306938	1444	1494	16.5844 min, 3.785 s	0.147	908
Cyclobutanol	1.19	44.04	XIC(44.04Â±500ppm)	73035028	792	592	16.6677 min, 5.209 s	0.168	743
2,5-Pyrrolidinedione, 1-methyl-	1.41	113.05	XIC(113.05Â±500ppm)	17851708	1369	3942	16.6677 min, 5.409 s	0.2	851
Sulfurous acid, isobutyl pentyl ester	1.37	57.09	XIC(57.09Â±500ppm)	8447699	307	1175	16.7511 min, 1.818 s	0.232	753
cis-3-Methyl-endo-tricyclo[5.2.1.0(2.6)]decane	1.24	81.07	XIC(81.07Â±500ppm)	19155830	1267	1367	16.7511 min, 2.412 s	0.149	834
Pentane, 3-methylene-	2.03	69.08	XIC(69.08Â±500ppm)	7742259	365	946	16.8344 min, 1.869 s	0.14	727
Benzoic acid, methyl ester	1.15	105.03	XIC(105.03Â±500ppm)	11959455	1014	1840	16.8344 min, 3.476 s	0.136	933
Naphthalene, decahydro-	2.1	67.07	XIC(67.07Â±500ppm)	1324557	274	172	16.9177 min, 2.526 s	0.15	857
2-Butoxyethyl acetate	1.28	43.04	XIC(43.04Â±500ppm)	21536918	1216	906	16.9177 min, 2.688 s	0.114	902
4-Hepten-3-one, 4-methyl-	1.3	97.04	XIC(97.04Â±500ppm)	11593634	1673	2246	16.9177 min, 3.882 s	0.155	846
Benzofuran, 2-methyl-	1.06	131.05	XIC(131.05Â±500ppm)	7957121	861	2726	17.0011 min, 3.316 s	0.137	916
3-Methylene-2-norbornanone	0.87	79.06	XIC(79.06Â±500ppm)	1925617	218	253	17.0844 min, 3.535 s	0.146	785
2-Cyclopenten-1-one, 2-hydroxy-3-methyl-	1.43	112.05	XIC(112.05Â±500ppm)	1568105	514	485	17.0844 min, 4.597 s	0.176	744
Benzene, (1-methylbutyl)-	1.07	105.07	XIC(105.07Â±500ppm)	2255746	444	532	17.1678 min, 2.507 s	0.134	808
2-Ethyl-3-methylcyclopent-2-en-1-one	3.03	81.07	XIC(81.07Â±500ppm)	3051825	551	527	17.2511 min, 3.456 s	0.161	777
3-Ethenyl-3-methylcyclopentanone	1.18	68.05	XIC(68.05Â±500ppm)	4483831	375	550	17.2511 min, 3.791 s	0.133	768
Benzonitrile, 4-methyl-	1.49	117.06	XIC(117.06Â±500ppm)	2342167	702	588	17.2511 min, 3.841 s	0.146	905
Benzene, 1-ethyl-3-(1-methylethyl)-	1	133.1	XIC(133.10Â±500ppm)	433885	185	205	17.3344 min, 2.541 s	0.126	810
Bicyclo[8.2.0]dodecane, 11,11-dimethyl-	1.3	138.07	XIC(138.07Â±500ppm)	842435	299	471	17.3344 min, 3.664 s	0.141	739
Phenol, 2,4-dimethyl-	1.17	122.07	XIC(122.07Â±500ppm)	7756405	919	1252	17.4178 min, 3.394 s	0.141	763
3,4-(Methylenedioxy)toluene	1.07	135.05	XIC(135.05Â±500ppm)	1797453	493	468	17.4178 min, 3.424 s	0.13	761
2,5-Dimethylanisole	1.86	136.09	XIC(136.09Â±500ppm)	5943492	1874	1973	17.5845 min, 2.962 s	0.143	897
Pentane, 1-propoxy-	1.26	43.04	XIC(43.04Â±500ppm)	19399526	1353	655	17.5845 min, 4.069 s	0.17	750
2,5-Cyclohexadiene-1,4-dione, 2,6-dimethyl-	1.08	68.04	XIC(68.04Â±500ppm)	841375	163	126	17.6678 min, 3.910 s	0.148	703
Levoglucosenone	1.02	98.04	XIC(98.04Â±500ppm)	2697798	396	846	17.7511 min, 4.753 s	0.16	887
1,3-Benzodioxol-2-one	1.05	64.04	XIC(64.04Â±500ppm)	3428070	776	280	17.9178 min, 3.990 s	0.135	902
3,5-Dimethylanisole	1.13	136.09	XIC(136.09Â±500ppm)	2886313	467	779	18.0012 min, 3.072 s	0.134	787
Methane, isocyanato-	1.47	57.09	XIC(57.09Â±500ppm)	15647200	2643	2536	18.0845 min, 1.768 s	0.139	817
2H-Pyran-3(4H)-one, dihydro-6-methyl-	0.87	56.04	XIC(56.04Â±500ppm)	5513562	981	914	18.1678 min, 6.449 s	0.22	709
1-Methyldecahydronaphthalene	2.13	67.07	XIC(67.07Â±500ppm)	7795418	1224	987	18.2512 min, 2.370 s	0.144	870
Benzene, 1-ethoxy-4-ethyl-	1	107.09	XIC(107.09Â±500ppm)	1166480	146	271	18.2512 min, 2.865 s	0.147	779
o-Isopropenyltoluene	1.27	117.07	XIC(117.07Â±500ppm)	1870448	875	663	18.2512 min, 2.919 s	0.142	878
Sulfurous acid, hexyl 2-pentyl ester	1.56	43.07	XIC(43.07Â±500ppm)	21347671	954	1021	18.3345 min, 1.776 s	0.126	770
cis-3-Methyl-exo-tricyclo[5.2.1.0(2.6)]decane	0.21	67.07	XIC(67.07Â±500ppm)	606381	112	120	18.3345 min, 2.466 s	0.126	825
Octanoic acid, methyl ester	1.17	74.04	XIC(74.04Â±500ppm)	1259531	219	206	18.4179 min, 2.402 s	0.099	788
Benzyl methyl ketone	1.03	43.04	XIC(43.04Â±500ppm)	3177225	217	189	18.4179 min, 3.822 s	0.143	881
Decane, 2,9-dimethyl-	1.36	57.09	XIC(57.09Â±500ppm)	43064577	2967	4698	18.5012 min, 1.797 s	0.123	839
Benzene, 1-methyl-4-(2-propenyl)-	1.09	117.07	XIC(117.07Â±500ppm)	939181	385	350	18.5012 min, 2.912 s	0.113	888
Cis-4-methyl-exo-tricyclo[5.2.1.0(2.6)]decane	0.41	81.07	XIC(81.07Â±500ppm)	11055024	690	1941	18.5845 min, 2.520 s	0.142	875
7-Methyl-1,2,3,5,8,8a-hexahydronaphthalene	0.95	105.07	XIC(105.07Â±500ppm)	2470848	274	459	18.5845 min, 2.553 s	0.14	839
Cyclohexane, pentyl-	1.23	83.09	XIC(83.09Â±500ppm)	9037399	343	2087	18.6679 min, 2.088 s	0.093	823
Ethanone, 1-(2-methylphenyl)-	2.08	91.06	XIC(91.06Â±500ppm)	1795329	656	224	18.8346 min, 3.602 s	0.148	845
Cyclohexene, 1-pentyl-	0.83	81.07	XIC(81.07Â±500ppm)	2814765	110	456	18.9179 min, 2.325 s	0.139	743
Benzyl nitrile	1.28	117.06	XIC(117.06Â±500ppm)	6750905	1296	1794	18.9179 min, 4.438 s	0.161	934
6-Dodecene, (Z)-	2.76	55.07	XIC(55.07Â±500ppm)	7679420	220	701	19.0012 min, 1.974 s	0.309	742
Tricyclo[5.2.1.0(2,6)]dec-4-ene, 4-methyl-	0.9	81.07	XIC(81.07Â±500ppm)	16065857	1127	2177	19.0012 min, 2.606 s	0.147	843
Phenol, 2-ethyl-	1.17	107.05	XIC(107.05Â±500ppm)	10322563	1634	1543	19.0012 min, 3.223 s	0.122	905
Pentanedioic acid, dimethyl ester	1.17	59.05	XIC(59.05Â±500ppm)	977850	401	385	19.0012 min, 3.290 s	0.119	895
Cyclohexane, 3-ethyl-5-methyl-1-propyl-	0.98	69.08	XIC(69.08Â±500ppm)	6349600	214	846	19.0846 min, 1.985 s	0.131	732
2-Hepten-4-one, 2-methyl-	0.87	55.07	XIC(55.07Â±500ppm)	2761272	586	302	19.0846 min, 4.203 s	0.182	732
Cyclohexane, 1-methyl-2-pentyl-	2.36	55.07	XIC(55.07Â±500ppm)	4425037	481	667	19.3346 min, 2.000 s	0.108	791
2-Hydroxy-5-ethyl-5-methylcyclopent-2-en-1-one	1.13	94.04	XIC(94.04Â±500ppm)	605953	133	125	19.3346 min, 3.186 s	0.122	713
Benzene, (1-methyl-2-cyclopropen-1-yl)-	0.55	130.08	XIC(130.08Â±500ppm)	11962305	769	3717	19.3346 min, 3.317 s	0.126	931
Benzene, 1,2-dimethoxy-	1.55	138.07	XIC(138.07Â±500ppm)	5903480	1074	1595	19.4179 min, 3.782 s	0.161	879
1H-Pyrrole-3-carbonitrile	1.26	92.04	XIC(92.04Â±500ppm)	2063255	487	430	19.4179 min, 4.069 s	0.143	882
Decalin, anti-1-methyl-, cis-	0.4	81.07	XIC(81.07Â±500ppm)	7095656	1394	1112	19.5013 min, 2.441 s	0.15	829
Acetic acid, butoxyhydroxy-, butyl ester	1.09	57.08	XIC(57.08Â±500ppm)	8656616	1248	1142	19.5013 min, 2.822 s	0.112	783
Spiro[4.4]nonan-2-one	0.77	109.07	XIC(109.07Â±500ppm)	657373	146	148	19.5013 min, 3.183 s	0.156	704
Phenol, 2,6-dimethyl-	1.18	107.05	XIC(107.05Â±500ppm)	36836631	2284	3357	19.5013 min, 3.253 s	0.122	919
Piperidine, 4-methyl-1-nitroso-	1.09	42.06	XIC(42.06Â±500ppm)	16348894	704	517	19.5013 min, 5.672 s	0.209	710
2-Methylindene	1.16	130.08	XIC(130.08Â±500ppm)	12060773	2361	3824	19.5846 min, 3.353 s	0.174	918
N-Methyl-9-aza-tricyclo[6.2.2.0(2,7)]dodec-2,4,6,11-tetraene-10-one	0.26	128.06	XIC(128.06Â±500ppm)	1169077	225	422	19.5846 min, 3.699 s	0.133	738
(3aR,3bS,6S,6aR,6bS)-6-Isopropyl-3b-methyloctahydrocyclobuta[1,2:3,4]di[5]annulen-1(2H)-one	0.38	81.07	XIC(81.07Â±500ppm)	2543551	387	544	19.668 min, 2.392 s	0.221	721
Cyclohexane, 1-methyl-4-(1-methylbutyl)-	0.88	55.07	XIC(55.07Â±500ppm)	10562441	273	924	19.7513 min, 2.038 s	0.125	707
Cyclopentane, 1,1,3-trimethyl-3-(2-methyl-2-propenyl)-	0.81	69.08	XIC(69.08Â±500ppm)	8819707	391	1166	19.8346 min, 2.024 s	0.108	753
Spiro[5.5]undecane	0.26	81.07	XIC(81.07Â±500ppm)	4084408	505	608	20.0013 min, 2.521 s	0.132	875
Cycloprop[a]indene, 1,1a,6,6a-tetrahydro-	1.11	128.06	XIC(128.06Â±500ppm)	1133546	356	382	20.0013 min, 3.544 s	0.136	870
Ethanone, 1-(3-hydroxyphenyl)-	1.2	121.03	XIC(121.03Â±500ppm)	1144436	392	308	20.0013 min, 3.828 s	0.139	749
Naphthalene, decahydro-2,6-dimethyl-	1.39	81.07	XIC(81.07Â±500ppm)	6905823	773	1089	20.0847 min, 2.245 s	0.111	793
Heptanediamide, N,N'-di-benzoyloxy-	1.29	105.04	XIC(105.04Â±500ppm)	737300	212	205	20.0847 min, 3.238 s	0.116	873
1-Propanone, 1-phenyl-	1.2	105.03	XIC(105.03Â±500ppm)	2059448	358	526	20.168 min, 3.644 s	0.131	860
Hexane, 1,1'-oxybis-	0.81	43.07	XIC(43.07Â±500ppm)	13929758	876	959	20.2513 min, 1.809 s	0.121	741
L-Alanine, N-(trifluoroacetyl)-, butyl ester	0.79	140.16	XIC(140.16Â±500ppm)	807887	201	653	20.2513 min, 1.836 s	0.096	726
cis,trans-1,6-Dimethylspiro[4.5]decane	0.56	81.07	XIC(81.07Â±500ppm)	2892414	136	461	20.2513 min, 2.180 s	0.134	726
Benzene, 1,3-dimethoxy-	1.15	138.07	XIC(138.07Â±500ppm)	1559138	300	946	20.2513 min, 3.686 s	0.133	851
Phenol, 2,3-dimethyl-	1.16	107.05	XIC(107.05Â±500ppm)	61833048	1865	4254	20.418 min, 3.273 s	0.123	901
2-Ethyltetrahydrofuran	1.44	71.06	XIC(71.06Â±500ppm)	2968480	899	701	20.418 min, 4.261 s	0.17	790
Naphthalene, decahydro-1,6-dimethyl-	2.22	81.07	XIC(81.07Â±500ppm)	21113512	519	1942	20.7514 min, 2.304 s	0.116	820
Naphthalene, 1,2-dihydro-4-methyl-	1.06	129.07	XIC(129.07Â±500ppm)	909565	287	456	20.7514 min, 3.138 s	0.126	793
Cyclododecanemethanol	0.75	69.08	XIC(69.08Â±500ppm)	7852749	290	1193	20.8347 min, 2.089 s	0.115	788
Phenol, 4-methoxy-3-methyl-	1.12	123.05	XIC(123.05Â±500ppm)	6615790	678	1582	20.8347 min, 3.456 s	0.131	786
1H-Indene, 2,3-dihydro-4,7-dimethyl-	0.64	131.09	XIC(131.09Â±500ppm)	1103241	249	324	20.9181 min, 2.903 s	0.112	823
Ethyl-2-benzofuran	1.07	131.05	XIC(131.05Â±500ppm)	1890724	507	828	20.9181 min, 3.316 s	0.13	842
Phenol, 2-ethyl-4-methyl-	1.14	121.07	XIC(121.07Â±500ppm)	1295124	315	404	21.0014 min, 3.386 s	0.124	783
Hexane, 1-(isopropylidenecyclopropyl)-	0.69	81.07	XIC(81.07Â±500ppm)	18940630	526	1806	21.0847 min, 2.187 s	0.103	774
Butanedioic acid, diethyl ester	1.3	101.02	XIC(101.02Â±500ppm)	8322741	2816	1941	21.0847 min, 3.055 s	0.115	934
1,2-Naphthalenedione	1.14	102.05	XIC(102.05Â±500ppm)	1957685	426	515	21.0847 min, 4.286 s	0.155	873
1-Methyl-2-(4-methylpentyl)cyclopentane	2.1	55.07	XIC(55.07Â±500ppm)	14408780	448	1948	21.1681 min, 2.004 s	0.095	806
1H-Indene, 1-ethyloctahydro-7a-methyl-, (1a,3aÃŸ,7aa)-	0.57	81.07	XIC(81.07Â±500ppm)	14254079	257	1391	21.1681 min, 2.309 s	0.102	755
Cyclopentylcyclohexane	0.2	82.08	XIC(82.08Â±500ppm)	3178934	366	893	21.1681 min, 2.456 s	0.112	809
Creosol	1.12	123.05	XIC(123.05Â±500ppm)	2953946	428	823	21.1681 min, 3.503 s	0.125	870
1-Octanol	1.2	42.06	XIC(42.06Â±500ppm)	7368770	385	220	21.1681 min, 5.324 s	0.196	706
Benzo[c]thiophene	1.1	134.02	XIC(134.02Â±500ppm)	2504280	565	1438	21.2514 min, 4.107 s	0.141	937
trans-1-Phenyl-1-pentene	0.93	117.07	XIC(117.07Â±500ppm)	989776	218	366	21.4181 min, 2.972 s	0.123	786
Cyclodecane	3.52	55.07	XIC(55.07Â±500ppm)	7274675	520	936	21.5014 min, 1.941 s	0.118	841
Cycloundecene, 1-methyl-	0.35	95.09	XIC(95.09Â±500ppm)	15517046	731	1708	21.5014 min, 2.343 s	0.153	832
Phenol, 3,4-dimethyl-	1.22	107.05	XIC(107.05Â±500ppm)	10106302	1834	1277	21.5014 min, 3.436 s	0.132	789
Cyclohexane, 1-methyl-3-pentyl-	0.77	97.1	XIC(97.10Â±500ppm)	8987520	797	3028	21.5848 min, 2.078 s	0.101	831
Ethyl 4-acetoxybutanoate	3.75	43.04	XIC(43.04Â±500ppm)	1107138	409	94	21.7515 min, 3.083 s	0.116	842
Cyclopentane, 1-hydroxymethyl-1,3-dimethyl-	0.46	97.1	XIC(97.10Â±500ppm)	3574854	294	1389	21.8348 min, 2.075 s	0.101	775
Benzofuran, 4,7-dimethyl-	1.06	146.07	XIC(146.07Â±500ppm)	4481369	1478	2412	21.8348 min, 3.306 s	0.127	831
Phenol, 3-(1-methylethyl)-	1.11	121.07	XIC(121.07Â±500ppm)	2509403	332	616	21.9181 min, 3.362 s	0.126	755
1,1'-Bicyclohexyl, 2-(2-methylpropyl)-, cis-	0.65	83.09	XIC(83.09Â±500ppm)	5170679	371	1638	22.0015 min, 2.091 s	0.101	736
1-Propanol, 2-methyl-	1.09	43.04	XIC(43.04Â±500ppm)	39500285	2711	1859	22.0848 min, 2.978 s	0.111	739
2-Hydroxy-3-propyl-2-cyclopenten-1-one	0.74	55.06	XIC(55.06Â±500ppm)	537558	119	66	22.0848 min, 3.421 s	0.117	762
Cyclohexane, (3-methylpentyl)-	1.61	83.09	XIC(83.09Â±500ppm)	3504115	136	988	22.2515 min, 2.050 s	0.102	723
(4-Methoxy-phenyl)-(2-nitrocyclohexyl)-methanol	1	137.13	XIC(137.13Â±500ppm)	2218391	411	952	22.2515 min, 2.320 s	0.117	740
Trans-tricyclo[6.2.1.0(2.6)]undecane	0.98	67.07	XIC(67.07Â±500ppm)	681524	235	90	22.2515 min, 2.805 s	0.136	777
Cyclopentane, 1-pentyl-2-propyl-	1.75	69.08	XIC(69.08Â±500ppm)	9598705	164	1167	22.3348 min, 1.990 s	0.109	715
(3aS,8aR)-2,3,5,6,7,8-hexahydro-3a,8a-methano-1H,4H-azulen-1-one	0.53	79.06	XIC(79.06Â±500ppm)	435250	164	88	22.3348 min, 2.547 s	0.197	766
2-Propenal, 3-(2-furanyl)-	1.38	122.04	XIC(122.04Â±500ppm)	1771016	403	485	22.3348 min, 5.070 s	0.181	769
Tetracyclo[5.2.1.0(2,6).0(3,5)]decane, 4,4-dimethyl-	0.18	95.08	XIC(95.08Â±500ppm)	1762036	116	435	22.4182 min, 2.538 s	0.131	792
1,4-Cyclohexadiene-1,2-dicarboxylic anhydride	2.84	78.05	XIC(78.05Â±500ppm)	1023449	277	81	22.5015 min, 3.826 s	0.136	741
Tricyclo[4.2.1.1(2,5)]deca-3,7-diene-9,10-dione, (1a,2ÃŸ,5ÃŸ,6a)-	1.12	131.05	XIC(131.05Â±500ppm)	6864084	620	1548	22.5849 min, 4.593 s	0.155	849
2,3-Anhydro-d-galactosan	0.47	43.04	XIC(43.04Â±500ppm)	1487716	205	85	22.5849 min, 4.983 s	0.206	822
5-Cyclohexyl-1-pentene	0.14	67.07	XIC(67.07Â±500ppm)	1155474	178	213	22.6682 min, 2.685 s	0.129	844
2,5-Dimethylbenzoxazole	1.96	147.07	XIC(147.07Â±500ppm)	763519	277	298	22.8349 min, 3.670 s	0.14	805
Indan, epoxide	1.36	104.07	XIC(104.07Â±500ppm)	1017909	255	274	22.8349 min, 4.280 s	0.135	889
3,4-Anhydro-d-galactosan	1.13	71.02	XIC(71.02Â±500ppm)	1910044	744	584	22.9182 min, 4.849 s	0.177	806
Cyclohexene, 3-(1-hexenyl)-, (E)-	0.78	107.09	XIC(107.09Â±500ppm)	3643170	389	620	23.0016 min, 2.636 s	0.139	796
1H-Benzimidazole, 5,6-dimethyl-	1.07	131.05	XIC(131.05Â±500ppm)	1130843	323	457	23.0016 min, 3.420 s	0.123	768
Cyclodecane, octyl-	2.28	69.08	XIC(69.08Â±500ppm)	4472226	389	876	23.0849 min, 1.995 s	0.191	758
Furan, 3-phenyl-	1.05	144.06	XIC(144.06Â±500ppm)	2480189	437	1208	23.0849 min, 3.613 s	0.117	831
Phenol, 2-ethyl-5-methyl-	1.11	121.07	XIC(121.07Â±500ppm)	5388189	804	955	23.1682 min, 3.213 s	0.118	840
Phenol, 2,4,5-trimethyl-	0.33	121.07	XIC(121.07Â±500ppm)	1727782	254	566	23.1682 min, 3.503 s	0.127	856
m-Guaiacol	1.23	124.05	XIC(124.05Â±500ppm)	1556306	433	438	23.1682 min, 3.825 s	0.133	718
2-Coumaranone	1.19	78.06	XIC(78.06Â±500ppm)	2864473	221	145	23.1682 min, 4.681 s	0.142	828
cis,trans-2-Ethylbicyclo[4.4.0]decane	0.46	81.07	XIC(81.07Â±500ppm)	19288776	849	2057	23.2516 min, 2.421 s	0.125	860
2-Ethyl-2,3-dihydro-1H-indene	1.15	117.07	XIC(117.07Â±500ppm)	1848347	374	491	23.2516 min, 3.101 s	0.127	735
1,7-Dimethyl-4-(1-methylethyl)cyclodecane	1.33	69.08	XIC(69.08Â±500ppm)	12630653	814	1617	23.3349 min, 2.018 s	0.24	796
Tricyclo[5.2.1.0(2,6)]dec-3-ene, 4-ethyl-	0.16	95.08	XIC(95.08Â±500ppm)	5324339	235	950	23.3349 min, 2.620 s	0.122	809
Quinoline	2.48	129.06	XIC(129.05Â±500ppm)	4865841	834	916	23.3349 min, 4.435 s	0.173	941
Undecane, 2,9-dimethyl-	2.25	57.09	XIC(57.09Â±500ppm)	13874208	1552	1759	23.4183 min, 1.831 s	0.092	875
Cis-3-ethyl-endo-tricyclo[5.2.1.0(2.6)]decane	0.27	95.09	XIC(95.09Â±500ppm)	4331650	186	1024	23.4183 min, 2.557 s	0.133	714
Cyclohexane, 1,5-dimethyl-2,3-divinyl-	0.81	107.08	XIC(107.08Â±500ppm)	1875991	447	434	23.5016 min, 2.679 s	0.136	800
2(3H)-Furanone, dihydro-5-propyl-	1.18	85.03	XIC(85.03Â±500ppm)	5065409	1259	1449	23.5016 min, 5.169 s	0.175	794
1,2-Benzenediol, O-(2-furoyl)-O'-pentadedecafluorooctanoyl-	0.87	95.09	XIC(95.09Â±500ppm)	8748980	216	1508	23.5849 min, 2.331 s	0.216	743
Cyclohexane, (cyclopentylmethyl)-	0.32	55.07	XIC(55.07Â±500ppm)	8979650	604	1027	23.5849 min, 2.369 s	0.12	804
1-Benzofuran-5-ol	1.17	134.04	XIC(134.04Â±500ppm)	2188006	1003	948	23.5849 min, 3.954 s	0.135	893
Benzenepropanenitrile	1.43	91.06	XIC(91.06Â±500ppm)	8717646	1894	851	23.5849 min, 4.566 s	0.167	892
3,4-Dimethoxytoluene	1.53	152.09	XIC(152.09Â±500ppm)	8753605	2372	1684	23.6683 min, 3.581 s	0.14	904
cis,cis-1,6-Dimethylspiro[4.5]decane	0.38	95.09	XIC(95.09Â±500ppm)	2124793	122	729	23.7516 min, 2.547 s	0.105	790
2-Ethyl-1-H-indene	1.14	129.07	XIC(129.07Â±500ppm)	1491857	260	321	23.7516 min, 3.302 s	0.117	823
Phenol, 2-ethyl-6-methyl-	1.16	121.07	XIC(121.07Â±500ppm)	3410110	449	641	23.835 min, 3.237 s	0.111	842
2-Cyclohexen-1-one, 4-(1-methylethyl)-	1.17	43.04	XIC(43.04Â±500ppm)	2104906	280	159	23.9183 min, 4.797 s	0.201	736
Phenol, 2-methyl-5-(1-methylethyl)-, acetate	2.07	135.05	XIC(135.05Â±500ppm)	1638385	363	433	24.0016 min, 3.489 s	0.125	730
2(3H)-Benzofuranone, 3-methyl-	1.04	120.06	XIC(120.06Â±500ppm)	1011464	287	376	24.0016 min, 4.213 s	0.143	919
Undecane, 4-ethyl-	2.7	57.09	XIC(57.09Â±500ppm)	7070311	622	1441	24.085 min, 1.838 s	0.102	888
Pentadec-7-ene, 7-bromomethyl-	1.53	69.08	XIC(69.08Â±500ppm)	20467381	403	2468	24.2517 min, 2.043 s	0.112	801
Naphthalene, decahydro-2,6-dimethyl-3-octyl-	1.19	95.09	XIC(95.09Â±500ppm)	7490245	1064	2118	24.335 min, 2.346 s	0.121	750
Cyclooctane, tetradecyl-	1.84	69.08	XIC(69.08Â±500ppm)	17037008	325	2493	24.5017 min, 2.041 s	0.154	759
Benzene, hexyl-	0.68	91.06	XIC(91.06Â±500ppm)	3413294	506	466	24.5017 min, 2.581 s	0.091	846
Phenol, 4-propyl-	1.18	107.05	XIC(107.05Â±500ppm)	2892321	741	786	24.5017 min, 3.227 s	0.112	827
Phenol, 3-ethyl-5-methyl-	1.93	121.07	XIC(121.07Â±500ppm)	5510972	614	1371	24.585 min, 3.268 s	0.119	859
Phenol, 4-ethyl-2-methoxy-	0.58	137.06	XIC(137.06Â±500ppm)	975828	163	405	24.585 min, 3.424 s	0.12	777
Benzofuran, 7-methoxy-	1.07	148.05	XIC(148.05Â±500ppm)	1847405	407	1158	24.585 min, 4.056 s	0.138	824
2-Methyl-5-hydroxybenzofuran	1.21	148.05	XIC(148.05Â±500ppm)	950363	249	476	24.7517 min, 3.768 s	0.119	707
1,2-Benzenedicarbonitrile	3.32	128.04	XIC(128.04Â±500ppm)	2277353	523	691	24.7517 min, 5.261 s	0.191	884
trans, cis-2-Ethylbicyclo[4.4.0]decane	0.22	81.07	XIC(81.07Â±500ppm)	7824283	463	1144	24.835 min, 2.546 s	0.121	845
Phenol, 3,4,5-trimethyl-	1.63	121.07	XIC(121.07Â±500ppm)	2474658	389	566	24.835 min, 3.370 s	0.142	788
3,5-Dimethoxytoluene	1.18	152.09	XIC(152.09Â±500ppm)	4520026	1078	1579	24.835 min, 3.520 s	0.132	874
Cyclohexane, 1,1'-(1,2-dimethyl-1,2-ethanediyl)bis-	1.59	69.08	XIC(69.08Â±500ppm)	18353933	806	2053	25.0017 min, 2.052 s	0.176	749
Propiophenone, 2'-methyl-	1.3	119.06	XIC(119.06Â±500ppm)	712564	174	231	25.0017 min, 3.483 s	0.122	754
1-Naphthalenol	1.03	115.06	XIC(115.06Â±500ppm)	833223	176	236	25.0017 min, 3.971 s	0.128	859
Ethanone, 1-(2,4-dihydroxyphenyl)-	1.01	137.03	XIC(137.03Â±500ppm)	770732	293	389	25.1684 min, 3.883 s	0.128	802
1H-Inden-1-one, 2,3-dihydro-	1.35	104.06	XIC(104.06Â±500ppm)	10083797	1351	1538	25.2517 min, 4.664 s	0.167	897
Cyclohexane, (2-ethyl-1-methylbutylidene)-	0.63	95.09	XIC(95.09Â±500ppm)	19682858	569	2369	25.3351 min, 2.304 s	0.115	782
Benzene, pentamethyl-	1.14	133.1	XIC(133.10Â±500ppm)	2839882	835	952	25.3351 min, 3.019 s	0.117	864
1H-Pyrrole, 1-phenyl-	1.14	143.08	XIC(143.08Â±500ppm)	703074	339	325	25.3351 min, 3.787 s	0.124	812
2(3H)-Furanone, 3-acetyldihydro-3-methyl-	1.15	43.04	XIC(43.04Â±500ppm)	2871923	376	190	25.3351 min, 5.451 s	0.212	813
Formamide, N-methyl-N-phenyl-	1.96	106.07	XIC(106.07Â±500ppm)	8940935	1213	1140	25.4184 min, 4.470 s	0.165	924
Cyclopentane, 1,2-dibutyl-	2.42	55.07	XIC(55.07Â±500ppm)	11975630	658	1125	25.5851 min, 2.028 s	0.133	811
Cyclodecene, 1-ethyl-2-methyl-	0.41	95.09	XIC(95.09Â±500ppm)	26252256	435	2506	25.5851 min, 2.335 s	0.132	809
Tricyclo[6.4.0.0(2,7)]dodecane	0.14	67.07	XIC(67.07Â±500ppm)	2206678	165	278	25.5851 min, 2.723 s	0.133	743
Cyclohexene, 3-octyl-	1.27	81.07	XIC(81.07Â±500ppm)	4035661	319	967	25.6684 min, 2.294 s	0.197	706
Ethanone, 1-[4-(1-methylethenyl)phenyl]-	1.05	145.07	XIC(145.07Â±500ppm)	819461	356	405	25.6684 min, 3.243 s	0.113	806
1H-Inden-1-one, 2,3-dihydro-3-methyl-	1.19	117.07	XIC(117.07Â±500ppm)	2263602	1040	424	25.6684 min, 4.236 s	0.162	819
Cyclotridecane	3.13	55.07	XIC(55.07Â±500ppm)	44129341	2063	3043	25.8351 min, 2.029 s	0.098	851
Cyclohexene, 1-nonyl-	0.6	55.07	XIC(55.07Â±500ppm)	13220496	258	1108	25.9185 min, 2.247 s	0.119	701
2-Propenenitrile, 3-phenyl-, (E)-	1.72	129.06	XIC(129.06Â±500ppm)	879665	292	319	25.9185 min, 4.410 s	0.152	900
Pentane, 2,2,3,4-tetramethyl-	0.93	43.07	XIC(43.07Â±500ppm)	3943174	385	441	26.0018 min, 1.953 s	0.128	745
1H-Indene, 2,3-dihydro-1,1,3-trimethyl-	1.08	145.11	XIC(145.11Â±500ppm)	431461	127	226	26.0018 min, 2.946 s	0.119	719
Indole	1.11	117.06	XIC(117.05Â±500ppm)	3592214	957	957	26.0018 min, 4.660 s	0.157	935
5-Eicosyne	0.83	81.07	XIC(81.07Â±500ppm)	5096027	270	922	26.1685 min, 2.294 s	0.165	723
1,3-Cyclopentadiene, 5,5-dimethyl-1,2-Dipropyl-	0.35	149.14	XIC(149.14Â±500ppm)	2291296	134	750	26.2518 min, 2.599 s	0.14	705
1,3-Di-O-acetyl-a-ÃŸ-d-ribopyranose	1.17	43.04	XIC(43.04Â±500ppm)	4321938	537	299	26.2518 min, 4.078 s	0.164	738
1,1'-Bicyclohexyl	1.03	82.08	XIC(82.08Â±500ppm)	24658262	1856	4126	26.3352 min, 2.546 s	0.103	877
Cyclohexanemethanol	1.05	55.07	XIC(55.07Â±500ppm)	8890210	158	404	26.4185 min, 2.100 s	0.035	735
Cyclopentane, 1,2,3-trimethyl-, (1a,2a,3ÃŸ)-	9.87	55.07	XIC(55.07Â±500ppm)	951553	588	143	26.5852 min, 1.840 s	0.482	735
Naphthalene, 1-methyl-	1.08	142.08	XIC(142.08Â±500ppm)	49934789	3027	10108	26.5852 min, 3.896 s	0.137	924
Cyclopentadecane	1.51	69.08	XIC(69.08Â±500ppm)	19524524	370	2484	26.6685 min, 2.099 s	0.147	789
(4aS,8R)-4a,8-Dimethyl-4,4a,5,6,7,8-hexahydronaphthalen-2(3H)-one	0.36	135.12	XIC(135.12Â±500ppm)	1683541	426	467	26.6685 min, 2.655 s	0.159	793
Cyclopentane, 1,2-dimethyl-3-(1-methylethyl)-	2.88	55.07	XIC(55.07Â±500ppm)	2040878	141	506	26.7519 min, 1.971 s	0.091	717
1H-Inden-1-one, 2,3-dihydro-3,3-dimethyl-	1.2	145.07	XIC(145.07Â±500ppm)	10968581	2257	2898	26.7519 min, 3.246 s	0.117	791
5-Acetoxymethyl-2-furaldehyde	1.07	126.03	XIC(126.03Â±500ppm)	1028420	372	666	26.7519 min, 4.238 s	0.132	843
9-Eicosene, (E)-	1.44	69.08	XIC(69.08Â±500ppm)	8340498	333	1324	26.9185 min, 2.052 s	0.154	786
2,5,6-Trimethylbenzimidazole	1.07	145.07	XIC(145.07Â±500ppm)	4910053	832	1336	26.9185 min, 3.238 s	0.113	748
2-Methoxy-4-vinylphenol	1.07	135.05	XIC(135.05Â±500ppm)	1886111	436	472	26.9185 min, 3.663 s	0.123	889
Cyclohexane, 1-ethyl-2-propyl-	0.92	69.08	XIC(69.08Â±500ppm)	7521970	378	1698	27.0019 min, 2.122 s	0.114	783
1,2,3-Trimethoxybenzene	1.45	168.08	XIC(168.08Â±500ppm)	1028691	301	574	27.0019 min, 3.884 s	0.147	788
1H-Inden-5-ol, 2,3-dihydro-	2.19	134.07	XIC(134.07Â±500ppm)	535215	166	198	27.0852 min, 3.890 s	0.14	752
Cyclopentane, 1,2-dipropyl-	0.99	69.08	XIC(69.08Â±500ppm)	13057533	958	1614	27.1686 min, 2.056 s	0.17	730
1,4-Benzodioxin, 2,3-dihydro-	1.81	108.02	XIC(108.02Â±500ppm)	785280	236	251	27.1686 min, 5.194 s	0.172	740
4a(2H)-Naphthalenemethanol, octahydro-	0.65	81.07	XIC(81.07Â±500ppm)	11902308	398	1915	27.2519 min, 2.371 s	0.139	717
Cyclohexane, (1,2-dimethylpropyl)-	2.72	69.08	XIC(69.08Â±500ppm)	10466037	468	1492	27.3352 min, 1.991 s	0.096	810
3-Methoxy-5-methylphenol	1.18	138.07	XIC(138.07Â±500ppm)	898311	370	454	27.3352 min, 3.748 s	0.125	878
Benzene, 4-ethyl-1,2-dimethoxy-	1.51	151.08	XIC(151.08Â±500ppm)	1637202	907	656	27.4186 min, 3.451 s	0.134	828
3-Buten-2-one, 3-methyl-4-phenyl-	1.09	160.09	XIC(160.09Â±500ppm)	2034329	482	1409	27.5019 min, 3.286 s	0.12	754
Tetradecane, 6,9-dimethyl-	2.68	57.09	XIC(57.09Â±500ppm)	7377725	1195	1472	27.5853 min, 1.835 s	0.087	889
3-Eicosene, (E)-	3.85	55.07	XIC(55.07Â±500ppm)	10991145	950	1008	27.6686 min, 1.972 s	0.143	821
2-Propenal, 3-phenyl-	1.07	132.06	XIC(132.06Â±500ppm)	533809	232	228	27.6686 min, 4.095 s	0.129	776
Cyclopentane, 1,1'-[4-(3-cyclopentylpropyl)-1,7-heptanediyl]bis-	2.59	69.08	XIC(69.08Â±500ppm)	10885419	297	1642	27.8353 min, 2.010 s	0.121	750
1H-Indene, 2-butyl-5-hexyloctahydro-	0.32	81.07	XIC(81.07Â±500ppm)	6309211	522	1015	27.8353 min, 2.443 s	0.132	756
4-Octene, 2,6-dimethyl-, [S-(Z)]-	1.17	69.08	XIC(69.08Â±500ppm)	3784026	148	980	27.9186 min, 2.129 s	0.11	713
1-{4-Propylbicyclo[2.2.2]octan-1-yl}ethanone	1.6	95.09	XIC(95.09Â±500ppm)	3987412	126	919	28.0853 min, 2.223 s	0.171	703
1(3H)-Isobenzofuranone	1.24	105.03	XIC(105.02Â±500ppm)	1944996	576	476	28.252 min, 5.398 s	0.19	922
7-Methylindan-1-one	1.4	146.07	XIC(146.07Â±500ppm)	1686883	968	685	28.3353 min, 4.303 s	0.155	833
Perhydrophenalene, (3aa, 6aa, 9aa, 9bÃŸ)-	0.45	178.17	XIC(178.17Â±500ppm)	622027	175	488	28.4187 min, 2.749 s	0.135	787
1,4-Benzenedicarboxaldehyde, 2-methyl-	1.15	148.06	XIC(148.06Â±500ppm)	1689157	320	692	28.502 min, 3.934 s	0.123	817
Phenol, 2,6-dimethoxy-	1.12	154.07	XIC(154.07Â±500ppm)	36672774	1764	3654	28.502 min, 4.244 s	0.14	889
Dodecane, 2,5-dimethyl-	1.08	57.09	XIC(57.09Â±500ppm)	46670591	3212	4837	28.5853 min, 1.846 s	0.072	898
1,1'-Bicyclohexyl, 2-methyl-, cis-	0.19	55.07	XIC(55.07Â±500ppm)	16415402	820	1287	28.5853 min, 2.441 s	0.104	853
2,2,4-Trimethyl-1,3-pentanediol diisobutyrate	1.94	43.07	XIC(43.07Â±500ppm)	1238549	158	72	28.5853 min, 2.713 s	0.133	742
Phenol, 3-methoxy-2,4,5-trimethyl-	2.61	166.1	XIC(166.10Â±500ppm)	1690405	186	945	28.5853 min, 3.253 s	0.131	767
Phenol, 2-(1,1-dimethylethyl)-5-methyl-	1.09	149.1	XIC(149.10Â±500ppm)	1585264	301	426	28.752 min, 2.991 s	0.112	816
Naphthalene, 1,2,3,4-tetrahydro-1,1,6-trimethyl-	1.04	159.12	XIC(159.12Â±500ppm)	996796	356	648	28.752 min, 3.018 s	0.115	823
Sulfurous acid, cyclohexylmethyl ethyl ester	0.96	97.1	XIC(97.10Â±500ppm)	10538185	727	2483	28.8354 min, 2.048 s	0.102	724
1-Heptylcyclohexene	0.31	81.07	XIC(81.07Â±500ppm)	7451664	496	1067	28.8354 min, 2.460 s	0.1	772
Phenol, 2-methoxy-3-(2-propenyl)-	1.13	164.09	XIC(164.09Â±500ppm)	4554545	1511	1737	28.8354 min, 3.450 s	0.117	922
Benzene, heptyl-	0.93	91.06	XIC(91.06Â±500ppm)	2046229	391	304	29.002 min, 2.554 s	0.087	859
Ethanone, 1-[4-(methylthio)phenyl]-	1.16	151.08	XIC(151.08Â±500ppm)	849972	249	303	29.002 min, 3.221 s	0.113	727
6-Methoxy-3-methylbenzofuran	1.06	162.07	XIC(162.07Â±500ppm)	2074284	428	1069	29.002 min, 3.818 s	0.129	787
7-Tetradecyne	1.25	95.09	XIC(95.09Â±500ppm)	12031986	171	1686	29.1687 min, 2.296 s	0.145	744
1,8,11-Heptadecatriene, (Z,Z)-	0.18	67.07	XIC(67.07Â±500ppm)	2323782	163	320	29.1687 min, 2.692 s	0.132	746
Cyclohexane, 1,1'-methylenebis-	0.29	55.07	XIC(55.07Â±500ppm)	1754179	166	210	29.2521 min, 2.508 s	0.108	705
Phenol, 2-methoxy-4-propyl-	1.15	137.06	XIC(137.06Â±500ppm)	8685766	2336	2428	29.2521 min, 3.258 s	0.113	899
N-[2-(4-Chloro-phenoxy)-ethyl]-4-methyl-benzamide	1.19	162.07	XIC(162.07Â±500ppm)	1292822	295	779	29.2521 min, 3.938 s	0.133	724
1-Hexadecanol	1.95	69.08	XIC(69.08Â±500ppm)	10857694	1155	1583	29.3354 min, 2.023 s	0.167	807
Naphthalene, 1,2,3,4-tetrahydro-5,7-dimethyl-	3.16	145.07	XIC(145.07Â±500ppm)	879528	219	323	29.3354 min, 3.878 s	0.179	728
1,2,3-Trimethylindene	1.28	143.09	XIC(143.09Â±500ppm)	501520	150	240	29.4187 min, 3.237 s	0.118	744
1-Tetracosene	1.32	69.08	XIC(69.08Â±500ppm)	13533791	274	1705	29.5021 min, 2.080 s	0.103	786
Copaene	1.65	105.07	XIC(105.07Â±500ppm)	765414	203	183	29.5854 min, 2.377 s	0.108	753
1-Octadecanol	1.2	69.08	XIC(69.08Â±500ppm)	6323005	165	1132	29.6688 min, 2.089 s	0.103	759
2-Hexylbicyclo[2.2.2]octane	0.67	95.09	XIC(95.09Â±500ppm)	16591268	416	1953	29.6688 min, 2.301 s	0.168	763
(2-Methylbutyl)cyclohexane	1.22	69.08	XIC(69.08Â±500ppm)	4074085	226	734	29.8354 min, 2.101 s	0.258	754
4-Iodo-3-methoxyamphetamine	1.23	44	XIC(44.00Â±500ppm)	2271603	180	50	29.8354 min, 3.606 s	0.115	710
1H-2-Benzopyran-1-one, 3,4-dihydro-	1.14	120.06	XIC(120.06Â±500ppm)	498848	148	214	29.8354 min, 5.031 s	0.143	815
Cyclohexane, 1,1,3-trimethyl-2-(3-methylpentyl)-	0.7	69.08	XIC(69.08Â±500ppm)	16066525	836	2465	29.9188 min, 2.102 s	0.102	856
Naphthalene, decahydro-1,6-dimethyl-4-(1-methylethyl)-	0.65	95.09	XIC(95.09Â±500ppm)	2295707	143	733	30.0021 min, 2.381 s	0.157	735
1-Cyclohexyl-2-cyclohexylidenethane	0.14	55.07	XIC(55.07Â±500ppm)	1897086	494	341	30.0021 min, 2.575 s	0.106	780
Naphthalene, 2-ethyl-	1.06	141.07	XIC(141.07Â±500ppm)	4126141	1274	1574	30.1688 min, 3.617 s	0.116	841
Bicyclo[10.1.0]tridec-1-ene	0.23	135.12	XIC(135.12Â±500ppm)	1170721	137	305	30.2521 min, 2.776 s	0.112	736
3-Methylene-1-oxa-spiro[4.5]decan-2-one	1.17	55.04	XIC(55.04Â±500ppm)	1363231	522	261	30.2521 min, 3.360 s	0.109	757
Cyclopentane, 1-hexyl-3-methyl-	1.94	55.07	XIC(55.07Â±500ppm)	18584975	458	1647	30.4188 min, 2.027 s	0.14	784
1,1'-Biphenyl, 2-methyl-	1.09	168.1	XIC(168.10Â±500ppm)	917852	457	721	30.5022 min, 3.559 s	0.122	879
Vanillin	1.13	151.04	XIC(151.04Â±500ppm)	7575999	4617	1762	30.5022 min, 4.569 s	0.151	933
Naphthalene, 1,7-dimethyl-	1.07	156.1	XIC(156.10Â±500ppm)	10607502	1807	4886	30.5855 min, 3.614 s	0.122	925
1H-Inden-1-one, 2,3-dihydro-3,4,7-trimethyl-	1.04	159.08	XIC(159.08Â±500ppm)	2023078	418	815	30.6688 min, 3.149 s	0.119	753
Tricyclo[3.3.1.1<3,7>]decane, 2-ethyl-	0.15	135.12	XIC(135.12Â±500ppm)	414272	106	116	30.8355 min, 2.923 s	0.114	720
Benzene, 1,2,3-trimethoxy-5-methyl-	1.39	167.07	XIC(167.07Â±500ppm)	1579606	481	784	30.9189 min, 3.642 s	0.136	844
Toluene, 4-(1,1-dimethyl-2-propynyloxy)-	1.77	159.08	XIC(159.08Â±500ppm)	692275	391	447	31.0022 min, 3.156 s	0.105	730
Cyclododecanone, 2-methylene-	0.54	55.07	XIC(55.07Â±500ppm)	3923662	139	350	31.1689 min, 2.359 s	0.23	746
Spiro[4.5]decan-7-one, 1,8-dimethyl-8,9-epoxy-4-isopropyl-	1.61	43.04	XIC(43.04Â±500ppm)	3994561	684	205	31.4189 min, 2.421 s	0.12	776
1H-Isoindole-1,3(2H)-dione, 2-methyl-	1.47	161.05	XIC(161.05Â±500ppm)	1124841	360	482	31.4189 min, 4.790 s	0.172	916
Decane, 2,8,8-trimethyl-	4.06	57.09	XIC(57.09Â±500ppm)	9203666	623	1376	31.5856 min, 1.837 s	0.079	857
Benzene, [(cyclohex-1-en-1-yl)methyl]-	1.01	104.06	XIC(104.06Â±500ppm)	9424594	1915	1918	31.5856 min, 3.386 s	0.128	794
1-Hexacosene	1.97	55.07	XIC(55.07Â±500ppm)	10272532	300	850	31.6689 min, 2.050 s	0.137	799
Naphthalene, 2-butyldecahydro-	0.68	81.07	XIC(81.07Â±500ppm)	1527289	202	444	31.6689 min, 2.390 s	0.105	811
9-Octadecyne	0.43	55.07	XIC(55.07Â±500ppm)	1421515	233	271	31.9189 min, 2.432 s	0.122	777
Perhydrophenanthrene, (4aa, 4bÃŸ, 8aa, 10aÃŸ)-	0.29	81.07	XIC(81.07Â±500ppm)	515355	128	131	31.9189 min, 2.613 s	0.201	791
Tridecane, 5-propyl-	3.2	57.09	XIC(57.09Â±500ppm)	5525089	814	1234	32.0856 min, 1.844 s	0.08	870
10-Heneicosene (c,t)	3.34	55.07	XIC(55.07Â±500ppm)	10656948	729	790	32.169 min, 1.987 s	0.163	854
Cyclohexane, 1-(cyclohexylmethyl)-4-methyl-, cis-	0.46	55.07	XIC(55.07Â±500ppm)	2301363	140	292	32.169 min, 2.410 s	0.096	742
1H-Fluorene, dodecahydro-	1.05	97.1	XIC(97.10Â±500ppm)	362015	146	120	32.169 min, 2.913 s	0.103	817
Acenaphthylene	1.09	152.06	XIC(152.06Â±500ppm)	19122061	1436	4393	32.3356 min, 4.424 s	0.142	964
Anthracene, 1,2,3,4,4a,9,9a,10-octahydro-	1.06	81.07	XIC(81.07Â±500ppm)	3918793	518	589	32.419 min, 3.196 s	0.114	761
Cyclohexane, octyl-	0.95	83.09	XIC(83.09Â±500ppm)	24760225	2606	4681	32.5023 min, 2.122 s	0.073	866
3,5-Dimethoxy-4-hydroxytoluene	1.11	168.08	XIC(168.08Â±500ppm)	4286208	888	1785	32.5857 min, 3.936 s	0.13	741
Phenol, 2-methoxy-4-(2-propenyl)-, acetate	1.3	164.09	XIC(164.09Â±500ppm)	214756	108	158	32.669 min, 3.604 s	0.114	804
Dispiro[4.2.4.2]tetradecane	0.42	41.06	XIC(41.06Â±500ppm)	931636	133	73	32.7523 min, 2.703 s	0.224	738
Tetradecane, 5-methyl-	0.92	43.07	XIC(43.07Â±500ppm)	6984253	1727	618	32.8357 min, 1.854 s	0.069	932
1,4-Benzenedicarboxaldehyde, 2,5-dimethyl-	1.02	161.06	XIC(161.06Â±500ppm)	485767	180	241	32.8357 min, 3.843 s	0.132	755
1-Docosene	2.44	55.07	XIC(55.07Â±500ppm)	4263637	329	603	32.919 min, 2.023 s	0.102	858
1-(2-Hydroxyethyl)-1,2,5,5-tetramethyl-cis-decalin(1R,2S,4as,8as)	1.1	69.08	XIC(69.08Â±500ppm)	2074222	540	228	32.919 min, 2.502 s	0.104	785
1,1'-Bicyclohexyl, 2-ethyl-, cis-	0.31	69.08	XIC(69.08Â±500ppm)	3409616	119	368	33.169 min, 2.441 s	0.095	769
Cycloundecane, (1-methylethyl)-	2.31	55.07	XIC(55.07Â±500ppm)	9144494	187	883	33.2524 min, 2.012 s	0.089	734
Decahydro-1,1,4a,5,6-pentamethylnaphthalene	0.8	123.12	XIC(123.12Â±500ppm)	2180944	387	993	33.2524 min, 2.576 s	0.11	712
1-Phenyl-5-methylheptane	1.11	92.06	XIC(92.06Â±500ppm)	970586	261	287	33.3357 min, 2.511 s	0.08	872
Benzofuran, 5-methoxy-6,7-dimethyl-	1.25	176.08	XIC(176.08Â±500ppm)	881366	408	727	33.4191 min, 3.730 s	0.131	710
Dichloroacetic acid, 4-hexadecyl ester	0.95	69.08	XIC(69.08Â±500ppm)	8445942	116	1225	33.5857 min, 2.083 s	0.087	801
1H-Inden-1-one, 2,3-dihydro-4,7-dimethyl-	1.33	160.09	XIC(160.09Â±500ppm)	302740	104	218	33.7524 min, 4.175 s	0.126	779
Acenaphthene	1.07	153.07	XIC(153.07Â±500ppm)	1152091	526	523	33.8358 min, 4.245 s	0.137	916
7-Pentadecyne	1.56	95.09	XIC(95.09Â±500ppm)	2328597	157	409	34.0024 min, 2.226 s	0.353	740
1,1'-Biphenyl, 4-methyl-	1.07	168.1	XIC(168.10Â±500ppm)	2983014	890	1909	34.0024 min, 3.657 s	0.117	926
Perhydrophenanthrene, (4aa, 4bÃŸ, 8aa, 10a.alpha)-	0.2	81.07	XIC(81.07Â±500ppm)	286553	122	78	34.0858 min, 2.823 s	0.154	722
Apocynin	1.07	151.04	XIC(151.04Â±500ppm)	2170643	596	875	34.0858 min, 4.422 s	0.137	868
1-Naphthalenecarbonitrile	1.82	153.06	XIC(153.06Â±500ppm)	2469757	1269	728	34.2525 min, 4.777 s	0.167	925
(Z)-10-Pentadecene-1-ol	1.15	55.07	XIC(55.07Â±500ppm)	1399685	102	156	34.3358 min, 2.263 s	0.319	739
Cyclohexane, 1,1'-(1,2-ethanediyl)bis-	0.17	82.08	XIC(82.08Â±500ppm)	1043207	283	355	34.4191 min, 2.459 s	0.088	852
Naphthalene, 2-(1-methylethyl)-	1.09	155.09	XIC(155.09Â±500ppm)	1084359	473	592	34.6692 min, 3.477 s	0.117	838
n-Nonylcyclohexane	1.21	55.07	XIC(55.07Â±500ppm)	1695707	182	312	35.1692 min, 2.093 s	0.087	742
2,4-Di-tert-butylphenol	1.12	191.15	XIC(191.15Â±500ppm)	973870	436	625	35.2525 min, 2.786 s	0.108	784
2H-1-Benzopyran-2-one, 3,4-dihydro-6-hydroxy-	1.09	122.04	XIC(122.04Â±500ppm)	583687	312	272	35.2525 min, 5.067 s	0.159	752
2-Naphthalenecarbonitrile	1.74	153.06	XIC(153.06Â±500ppm)	1442963	864	477	35.3359 min, 4.809 s	0.163	922
3-(2-Methyl-propenyl)-1H-indene	3.09	44	XIC(44.00Â±500ppm)	3161387	372	51	35.5026 min, 3.550 s	0.124	712
Naphthalene, 1,2,3,5,6,8a-hexahydro-4,7-dimethyl-1-(1-methylethyl)-, (1S-cis)-	1.07	161.14	XIC(161.14Â±500ppm)	231478	132	177	35.6692 min, 2.618 s	0.092	763
Naphthalene, 2,3,6-trimethyl-	1.36	44	XIC(44.00Â±500ppm)	4957658	434	61	35.6692 min, 3.565 s	0.117	773
Oxalic acid, butyl cyclohexylmethyl ester	0.38	97.1	XIC(97.10Â±500ppm)	1942671	302	928	35.9193 min, 2.138 s	0.073	817
Homovanillyl alcohol	1.07	137.06	XIC(137.06Â±500ppm)	5980402	1132	1980	35.9193 min, 4.289 s	0.139	796
Benzene, (1-butylhexyl)-	1.09	91.06	XIC(91.06Â±500ppm)	6677075	1323	928	36.1693 min, 2.352 s	0.088	884
Naphthalene, 1,6,7-trimethyl-	1.11	170.11	XIC(170.11Â±500ppm)	1801840	485	1066	36.336 min, 3.647 s	0.134	891
4-Nitroguaiacol	1.41	169.04	XIC(169.03Â±500ppm)	946496	238	388	36.336 min, 4.581 s	0.148	836
Nonacos-1-ene	2.58	55.07	XIC(55.07Â±500ppm)	577951	140	113	36.4193 min, 2.018 s	0.212	802
Benzene, (1-propylheptyl)-	1.08	91.06	XIC(91.06Â±500ppm)	4386021	970	849	36.5026 min, 2.359 s	0.088	883
Decahydro-8a-ethyl-1,1,4a,6-tetramethylnaphthalene	0.96	123.12	XIC(123.12Â±500ppm)	678731	276	402	36.6693 min, 2.554 s	0.102	725
1H-Phenalene	1.14	165.07	XIC(165.07Â±500ppm)	935729	369	520	36.9193 min, 4.222 s	0.132	849
Pentadecane, 4-methyl-	0.99	43.07	XIC(43.07Â±500ppm)	4988065	838	352	37.0027 min, 1.857 s	0.062	887
1-Tricosene	2.44	55.07	XIC(55.07Â±500ppm)	1871274	129	253	37.0027 min, 2.001 s	0.099	852
Dodecanoic acid	1.37	43.07	XIC(43.07Â±500ppm)	280432	140	37	37.1694 min, 2.371 s	0.077	734
Benzene, (1-ethyloctyl)-	1.18	91.06	XIC(91.06Â±500ppm)	3530656	607	520	37.1694 min, 2.392 s	0.086	874
Pentadecane, 2-methyl-	1.07	57.09	XIC(57.09Â±500ppm)	7061207	1147	1216	37.2527 min, 1.844 s	0.065	912
Phenol, 4-ethenyl-2,6-dimethoxy-	1.09	180.08	XIC(180.08Â±500ppm)	226314	142	183	37.2527 min, 3.996 s	0.122	736
2,6-Dimethoxybenzoquinone	1.1	69.02	XIC(69.02Â±500ppm)	3499357	999	669	37.2527 min, 5.831 s	0.187	877
4-Undecene, 5-methyl-, (Z)-	3.38	55.07	XIC(55.07Â±500ppm)	676049	219	107	37.5861 min, 1.955 s	0.185	811
Fluorene	1.14	166.08	XIC(166.08Â±500ppm)	5189666	847	2379	37.6694 min, 4.234 s	0.132	922
Dodecane, 1-cyclopentyl-4-(3-cyclopentylpropyl)-	1.97	55.07	XIC(55.07Â±500ppm)	621084	166	104	37.7527 min, 2.059 s	0.203	766
4,4'-Dimethylbiphenyl	1.15	182.11	XIC(182.11Â±500ppm)	238682	198	260	38.0861 min, 3.530 s	0.111	836
Cyclohexadecane	2	55.07	XIC(55.07Â±500ppm)	830293	236	171	38.4195 min, 2.010 s	0.09	891
9H-Fluorene, 9-methyl-	1.07	165.07	XIC(165.07Â±500ppm)	475182	194	314	38.5028 min, 4.015 s	0.125	843
Phenol, 2,6-dimethoxy-4-(2-propenyl)-	1.09	194.1	XIC(194.10Â±500ppm)	718925	485	612	38.7528 min, 3.763 s	0.119	885
1-Hexyl-2-nitrocyclohexane	1.9	55.07	XIC(55.07Â±500ppm)	356137	123	74	39.0028 min, 2.064 s	0.133	711
Dibenzofuran, 4-methyl-	1.01	182.08	XIC(182.08Â±500ppm)	1711901	354	1268	39.1695 min, 3.947 s	0.12	878
7-Hexadecene, (Z)-	2.83	55.07	XIC(55.07Â±500ppm)	383183	160	68	39.2529 min, 1.966 s	0.187	814
Benzene, (1-pentylhexyl)-	1.13	91.06	XIC(91.06Â±500ppm)	4013465	1068	756	39.7529 min, 2.315 s	0.085	898
9H-Xanthene	1.06	182.08	XIC(182.08Â±500ppm)	544734	229	421	40.0029 min, 4.123 s	0.129	833
Benzene, (1-propyloctyl)-	1.09	91.06	XIC(91.06Â±500ppm)	8188378	1866	1217	40.2529 min, 2.334 s	0.082	911
Cyclopentane, undecyl-	0.99	69.08	XIC(69.08Â±500ppm)	411910	133	149	40.5863 min, 2.070 s	0.074	736
(Z)-Hex-3-enyl (E)-2-methylbut-2-enoate	0.84	83.09	XIC(83.09Â±500ppm)	862441	312	376	40.5863 min, 2.104 s	0.08	782
Hexadecane, 4-methyl-	1.29	43.07	XIC(43.07Â±500ppm)	395034	171	55	40.753 min, 1.852 s	0.065	894
Benzaldehyde, 4-hydroxy-3,5-dimethoxy-	1.07	182.06	XIC(182.06Â±500ppm)	1199257	216	650	40.753 min, 4.793 s	0.138	853
Benzene, (1-ethylnonyl)-	1.15	91.06	XIC(91.06Â±500ppm)	5140613	1335	1114	41.003 min, 2.364 s	0.081	860
Hexadecane, 3-methyl-	0.77	57.09	XIC(57.09Â±500ppm)	421506	158	127	41.253 min, 1.862 s	0.062	934
Sulfurous acid, 2-propyl tridecyl ester	1.05	57.09	XIC(57.09Â±500ppm)	3717786	174	521	41.5864 min, 2.015 s	0.433	768
Dodecyl acrylate	0.93	55.05	XIC(55.05Â±500ppm)	303841	110	87	42.0864 min, 2.293 s	0.072	851
Benzene, (1-methyldecyl)-	1.1	105.07	XIC(105.07Â±500ppm)	7474132	2560	1874	42.3364 min, 2.399 s	0.077	933
9H-Fluorene, 4-methyl-	1.02	165.07	XIC(165.07Â±500ppm)	343815	139	231	42.5865 min, 4.241 s	0.129	888
13-Methyltetradecanal	4.43	43.07	XIC(43.07Â±500ppm)	1033902	302	114	42.7531 min, 2.331 s	0.074	897
Naphtho[2,1-b]furan, 1,2-dimethyl-	1.04	196.09	XIC(196.09Â±500ppm)	206811	109	186	43.2532 min, 3.790 s	0.108	710
9H-Fluoren-9-one	1.42	180.06	XIC(180.05Â±500ppm)	665436	477	444	43.2532 min, 4.862 s	0.151	914
1-Dodecanol, 3,7,11-trimethyl-	1.03	57.09	XIC(57.09Â±500ppm)	1180273	243	266	43.3365 min, 1.871 s	0.066	849
Benzene, (1-pentylheptyl)-	1.11	91.06	XIC(91.06Â±500ppm)	9924947	1642	1276	43.3365 min, 2.282 s	0.079	942
Benzene, (1-butyloctyl)-	1.08	91.06	XIC(91.06Â±500ppm)	6255703	1752	1271	43.5032 min, 2.296 s	0.08	940
Benzene, (1-propylnonyl)-	1.09	91.06	XIC(91.06Â±500ppm)	5724747	1048	903	43.9199 min, 2.306 s	0.078	924
3,4-Dimethoxy-ÃŸ-nitrostyrene	1.11	91.06	XIC(91.06Â±500ppm)	763946	121	123	44.1699 min, 3.751 s	0.114	718
Tetradecanoic acid	1.19	43.07	XIC(43.07Â±500ppm)	237479	159	37	44.4199 min, 2.340 s	0.072	810
Heptadecane, 2-methyl-	1.18	57.09	XIC(57.09Â±500ppm)	321432	107	114	44.5033 min, 1.848 s	0.059	855
Benzene, (1-ethyldecyl)-	1.13	91.06	XIC(91.06Â±500ppm)	4055585	701	608	44.5866 min, 2.347 s	0.077	923
Anthracene	1.19	178.08	XIC(178.08Â±500ppm)	9674915	3433	3367	44.67 min, 4.774 s	0.152	941
Phenanthrene	1.02	178.08	XIC(178.08Â±500ppm)	798247	232	538	45.0033 min, 4.735 s	0.145	944
Bis(1-chloro-2-propyl)(3-chloro-1-propyl)phosphate	1.92	41.06	XIC(41.06Â±500ppm)	1732152	227	162	45.8367 min, 3.501 s	0.147	703
Benzene, (1-methylundecyl)-	1.1	105.07	XIC(105.07Â±500ppm)	5178186	2245	1438	45.9201 min, 2.378 s	0.074	926
Hexadecane, 2,6,10,14-tetramethyl-	1.69	57.09	XIC(57.09Â±500ppm)	1456042	411	306	46.0867 min, 1.805 s	0.068	926
Benzene, (1-hexylheptyl)-	1.09	91.06	XIC(91.06Â±500ppm)	7192422	1142	1088	46.6701 min, 2.269 s	0.078	860
Benzene, (1-propyldecyl)-	1.1	91.06	XIC(91.06Â±500ppm)	2996772	893	644	47.3368 min, 2.296 s	0.075	911
Benzene, (1-ethylundecyl)-	1.12	91.06	XIC(91.06Â±500ppm)	2076424	618	469	48.0869 min, 2.328 s	0.075	885
4-Hydroxy-3-methoxy-ÃŸ-nitrostyrene	1.08	148.06	XIC(148.06Â±500ppm)	702609	153	519	48.5869 min, 4.657 s	0.127	837
Benzene, (1-methyldodecyl)-	1.13	105.07	XIC(105.07Â±500ppm)	4099505	1330	1047	49.337 min, 2.361 s	0.074	902
1,2-Benzenedicarboxylic acid, butyl 2-ethylhexyl ester	1.14	149.03	XIC(149.03Â±500ppm)	8505991	2052	2971	49.587 min, 3.283 s	0.109	916
3-methoxy-4-hydroxy-methyl-nitrostyrene	2.57	41.04	XIC(41.04Â±500ppm)	1571228	132	101	49.6704 min, 4.419 s	0.156	858
Phthalic acid, 8-bromoctyl isobutyl ester	1.13	149.03	XIC(149.03Â±500ppm)	2324333	803	1326	50.2537 min, 3.141 s	0.108	795
4b,8-Dimethyl-2-isopropylphenanthrene, 4b,5,6,7,8,8a,9,10-octahydro-	1.22	159.12	XIC(159.12Â±500ppm)	423523	372	493	51.5872 min, 3.198 s	0.102	793
Benzoic acid, 4-(4-ethylcyclohexyl)-, 2,3-dicyano-4-(pentyloxy)phenyl ester	1.06	215.19	XIC(215.19Â±500ppm)	312615	252	372	51.6705 min, 2.820 s	0.089	710
1,2-Benzenedicarboxylic acid, butyl octyl ester	1.15	149.03	XIC(149.03Â±500ppm)	2604285	1053	1531	51.7539 min, 3.187 s	0.109	853
1-Hexadecanol, acetate	1.07	43.06	XIC(43.06Â±500ppm)	744677	114	74	52.5873 min, 2.166 s	0.082	900
10,18-Bisnorabieta-8,11,13-triene	1.13	227.19	XIC(227.19Â±500ppm)	4393852	2041	3126	53.504 min, 3.322 s	0.106	831

## Sheet: Mangifera indica (SPE11
Name	Tailing.Factor	Base.Mass	Quant.Masses	Area	Peak.S.N	Quant.S.N	R.T...min.	FWHH..s.	Similarity
3,4-Dimethyldihydrofuran-2,5-dione	1.17	56.07	XIC(56.07Â±500ppm)	22934237	2189	2354	3.66668 min, 1.678 s	0.088	864
Pyrazine	1.28	80.03	XIC(80.03Â±500ppm)	90647827	4842	8737	3.75002 min, 2.141 s	0.11	961
Methyl vinyl ketone	0.65	43.04	XIC(43.04Â±500ppm)	6177172	293	133	3.83336 min, 1.704 s	0.105	738
1,4-Cyclohexadiene, 1-methyl-	1.23	79.05	XIC(79.05Â±500ppm)	8986872	918	617	3.9167 min, 1.658 s	0.094	906
3-Penten-2-one, (E)-	1.19	69.04	XIC(69.04Â±500ppm)	54303385	3997	4317	3.9167 min, 1.973 s	0.102	896
3-Hexanol, 3-methyl-	0.65	45.05	XIC(45.05Â±500ppm)	47948051	543	1019	4.00004 min, 1.531 s	0.098	741
1,3,5-Hexatriene, 2-methyl-	1.18	79.05	XIC(79.05Â±500ppm)	6940721	592	475	4.08338 min, 1.695 s	0.106	866
Furan, 2-methyl-	1.61	53.05	XIC(53.05Â±500ppm)	18211603	1742	1545	4.08338 min, 2.108 s	0.101	818
Pyridine	2.1	79.04	XIC(79.04Â±500ppm)	72185938	4542	2608	4.08338 min, 2.136 s	0.142	942
2,2'-Bioxirane	0.62	55.03	XIC(55.03Â±500ppm)	4015810	424	417	4.25006 min, 2.168 s	0.098	727
2-Butenoic acid, methyl ester	1.32	69.04	XIC(69.04Â±500ppm)	5094097	714	904	4.3334 min, 1.962 s	0.101	784
3-Diethylamino-2,2-dimethylpropionaldehyde	1.14	86.03	XIC(86.03Â±500ppm)	40002689	3330	4880	4.3334 min, 2.438 s	0.123	825
1-Hydroxy-2-butanone	1.67	57.05	XIC(57.05Â±500ppm)	197176622	4430	7781	4.41674 min, 2.223 s	0.13	943
4-Hexen-3-one	3.81	41.06	XIC(41.06Â±500ppm)	4046277	529	208	4.50008 min, 1.921 s	0.108	768
2(5H)-Furanone	1.2	55.03	XIC(55.03Â±500ppm)	11078507	1864	735	4.58342 min, 2.603 s	0.12	834
Butanoic acid	1.2	60.03	XIC(60.03Â±500ppm)	106665452	2015	3557	4.7501 min, 1.817 s	0.095	931
2-Butene-1,4-diol, (Z)-	1.86	42.06	XIC(42.06Â±500ppm)	39269155	788	662	4.7501 min, 2.175 s	0.12	821
Furan, 2,3-dihydro-4-methyl-	1.17	84.05	XIC(84.05Â±500ppm)	3753797	771	1046	4.83344 min, 2.257 s	0.115	832
Cyclopentanone	1.18	55.03	XIC(55.03Â±500ppm)	67442041	3498	4127	4.91678 min, 2.461 s	0.128	879
Crotonic acid	0.62	86.03	XIC(86.03Â±500ppm)	3405032	452	756	5.00012 min, 1.914 s	0.089	820
4-Methyl-2,4-bis(p-hydroxyphenyl)pent-1-ene, 2TMS derivative	1.72	207.03	XIC(207.03Â±500ppm)	39900915	217	7916	5.00012 min, 6.498 s	0.051	792
Propanenitrile, 3,3'-oxybis-	1.27	84.02	XIC(84.02Â±500ppm)	195675545	38052	11875	5.08346 min, 2.862 s	0.142	760
trans-4,4-Dimethyl-2-hexene	0.93	55.07	XIC(55.07Â±500ppm)	1722024	193	183	5.1668 min, 1.604 s	0.118	739
3(2H)-Furanone, dihydro-5-methyl-	0.53	42.06	XIC(42.06Â±500ppm)	4293865	240	166	5.33348 min, 2.454 s	0.127	734
Pentane, 2-nitro-	1.18	43.07	XIC(43.07Â±500ppm)	13870473	301	488	5.75018 min, 2.351 s	0.134	825
Pyridine, 2-methyl-	2.2	93.05	XIC(93.05Â±500ppm)	22496117	1875	2000	5.75018 min, 2.394 s	0.155	905
2-Butenoic acid, (E)-	0.68	41.06	XIC(41.06Â±500ppm)	5287813	554	234	5.83352 min, 2.047 s	0.092	806
Pyrazine, methyl-	1.49	94.05	XIC(94.05Â±500ppm)	96022650	30688	5433	5.83352 min, 2.564 s	0.146	930
2-Furanmethanol, tetrahydro-	1.83	71.05	XIC(71.05Â±500ppm)	46995776	1440	5104	6.0002 min, 2.655 s	0.149	845
Maleic anhydride	1.19	54.03	XIC(54.03Â±500ppm)	47974153	4715	4921	6.0002 min, 2.800 s	0.162	711
Butanoic acid, 2-hydroxy-, methyl ester	2.54	59.06	XIC(59.06Â±500ppm)	5006201	1085	1318	6.08354 min, 2.234 s	0.153	728
2-Cyclopenten-1-one	1.5	82.04	XIC(82.04Â±500ppm)	276139955	7337	12099	6.08354 min, 3.098 s	0.174	843
Furan, 2-ethyl-	1.07	53.06	XIC(53.06Â±500ppm)	7906709	490	972	6.33356 min, 2.482 s	0.124	714
Cyclopentanone, 2-methyl-	1.09	42.06	XIC(42.06Â±500ppm)	11642282	528	455	6.33356 min, 2.538 s	0.172	882
1,4-Cyclohexadiene, 1,2-dimethyl-	1.15	93.07	XIC(93.07Â±500ppm)	3081582	339	632	6.50024 min, 1.935 s	0.118	739
1,2-Ethanediol, monoacetate	1.24	43.03	XIC(43.03Â±500ppm)	32382186	2661	1397	6.66692 min, 2.719 s	0.139	971
2-Hexenal, (E)-	0.79	41.06	XIC(41.06Â±500ppm)	1596530	100	128	6.75026 min, 2.396 s	0.107	811
Nitrous acid, ethyl ester	1.35	60.03	XIC(60.03Â±500ppm)	1378274	251	182	6.75026 min, 6.338 s	0.075	839
2-Furanmethanol	1.27	98.03	XIC(98.03Â±500ppm)	196312306	7338	9491	6.8336 min, 2.703 s	0.168	902
2-Butanone	1.17	43.03	XIC(43.03Â±500ppm)	47595667	2302	1101	6.91694 min, 3.300 s	0.158	781
Pyridine, 3-methyl-	2.89	93.05	XIC(93.05Â±500ppm)	12084183	1065	1442	7.16696 min, 2.728 s	0.168	906
3-Heptyne	1.21	81.03	XIC(81.03Â±500ppm)	10505862	716	1119	7.58366 min, 3.011 s	0.161	829
4-Cyclopentene-1,3-dione	1.1	96.02	XIC(96.02Â±500ppm)	19300903	990	1674	7.58366 min, 4.006 s	0.189	939
4-Pentenoic acid	3.92	55.07	XIC(55.07Â±500ppm)	2038233	173	197	7.667 min, 2.106 s	0.122	778
2H-Pyran-3(4H)-one, dihydro-	2.61	42.05	XIC(42.05Â±500ppm)	18816734	3710	876	7.75034 min, 3.246 s	0.164	876
2-Amino-oxazole	1.31	84.04	XIC(84.04Â±500ppm)	3044230	477	683	7.91702 min, 3.151 s	0.206	821
1H-1,2,4-Triazole	0.8	42.06	XIC(42.06Â±500ppm)	1468462	116	72	8.00036 min, 2.520 s	0.211	708
2-Heptanone	0.45	43.04	XIC(43.04Â±500ppm)	4457793	329	206	8.0837 min, 2.290 s	0.115	852
o-Xylene	1.19	91.05	XIC(91.05Â±500ppm)	10100098	1897	1664	8.0837 min, 2.416 s	0.144	869
3-Furanmethanol	10.73	43.04	XIC(43.04Â±500ppm)	3791242	187	155	8.33372 min, 2.446 s	0.212	726
1-Penten-3-one, 2,4-dimethyl-	1.16	69.04	XIC(69.04Â±500ppm)	3529793	491	668	8.41706 min, 2.927 s	0.147	744
Glutaraldehyde	1.22	44.04	XIC(44.04Â±500ppm)	25824565	763	323	8.41706 min, 3.392 s	0.182	732
Furan, 2-ethyl-5-methyl-	1.14	95.01	XIC(95.01Â±500ppm)	11091081	994	2516	8.5004 min, 3.104 s	0.141	844
Pyridine, 2-ethyl-	2.28	106.06	XIC(106.06Â±500ppm)	5961287	680	1055	8.66708 min, 2.713 s	0.165	799
Pyrazine, 2,5-dimethyl-	3.79	42.05	XIC(42.05Â±500ppm)	15888267	3825	728	8.75042 min, 2.887 s	0.173	840
Ethanone, 1-(2-furanyl)-	1.24	95.01	XIC(95.01Â±500ppm)	188375613	8681	10455	8.75042 min, 3.229 s	0.163	900
Aminocyanoacetic acid	1.67	44	XIC(44.00Â±500ppm)	4692626	132	120	8.75042 min, 3.709 s	0.055	711
Methyl acetoxyacetate	1.76	43.03	XIC(43.03Â±500ppm)	29228428	1690	1215	8.83376 min, 3.026 s	0.169	912
2-Amino-4-methyl-oxazole	1.11	42.03	XIC(42.03Â±500ppm)	25239805	694	624	8.83376 min, 3.765 s	0.156	772
Butanoic acid, 4-hydroxy-	1.29	42.06	XIC(42.06Â±500ppm)	233664087	7651	3902	8.83376 min, 4.541 s	0.191	944
Pyrazine, ethyl-	1.62	107.06	XIC(107.06Â±500ppm)	40902249	3575	3717	8.9171 min, 2.916 s	0.156	943
1,4-Cyclohex-2-enedione	1.69	54.04	XIC(54.04Â±500ppm)	7576121	961	775	9.08378 min, 3.786 s	0.296	811
Pyrazine, 2,3-dimethyl-	0.95	67.05	XIC(67.05Â±500ppm)	4336748	640	579	9.16712 min, 2.962 s	0.219	730
Cyclopentanone, 3,4-bis(methylene)-	1.24	79.06	XIC(79.06Â±500ppm)	5137461	767	426	9.25046 min, 3.065 s	0.174	720
2-Cyclopenten-1-one, 2-hydroxy-	2.24	98.03	XIC(98.03Â±500ppm)	36466231	1607	5611	9.25046 min, 3.408 s	0.144	909
2(3H)-Furanone, dihydro-3-methylene-	1.27	40.05	XIC(40.05Â±500ppm)	12292950	860	500	9.3338 min, 3.608 s	0.165	704
Pyrazine, ethenyl-	1.37	106.05	XIC(106.05Â±500ppm)	13612702	1974	3031	9.50048 min, 3.190 s	0.151	894
2,5-Hexanedione	1.22	43.03	XIC(43.03Â±500ppm)	35299634	3015	1280	9.50048 min, 3.501 s	0.176	821
2-Cyclohexen-1-one	1.19	68.03	XIC(68.03Â±500ppm)	29452718	2445	2629	9.58382 min, 3.581 s	0.175	842
(1R)-2,6,6-Trimethylbicyclo[3.1.1]hept-2-ene	1.32	93.07	XIC(93.07Â±500ppm)	3056089	1236	639	9.66716 min, 2.015 s	0.18	873
Pyrazole, 1,4-dimethyl-	1.31	96.02	XIC(96.02Â±500ppm)	2301759	335	344	9.7505 min, 2.279 s	0.101	712
Pyridine, 3,4-dimethyl-	2.73	107.07	XIC(107.07Â±500ppm)	7561413	671	1163	9.7505 min, 2.831 s	0.174	922
2-Cyclopenten-1-one, 3,4-dimethyl-	1.13	67.06	XIC(67.06Â±500ppm)	16138051	653	1327	9.91718 min, 2.987 s	0.149	828
2(5H)-Furanone, 5-methyl-	1.19	55.03	XIC(55.03Â±500ppm)	84650783	3314	4190	9.91718 min, 4.201 s	0.178	872
2(3H)-Furanone, dihydro-5-methyl-	1.18	56.06	XIC(56.06Â±500ppm)	9051799	897	704	10.5839 min, 4.196 s	0.183	942
Oxazole, 4,5-dihydro-2,4,4-trimethyl-	4.37	42.05	XIC(42.05Â±500ppm)	2378417	297	117	10.7506 min, 3.164 s	0.19	729
4(1H)-Pyrimidinone, 2-methyl-	1.09	110.03	XIC(110.03Â±500ppm)	16074420	758	3200	10.7506 min, 3.559 s	0.152	702
3-Pentenoic acid, 3-methyl-, methyl ester	0.91	69.04	XIC(69.04Â±500ppm)	6526812	462	1129	10.8339 min, 3.270 s	0.154	733
2,3-Pentanedione	1.08	57.05	XIC(57.05Â±500ppm)	110516326	2790	10799	11.0006 min, 3.261 s	0.149	799
2-Butanone, 1-(acetyloxy)-	1.34	43.03	XIC(43.03Â±500ppm)	87779188	6562	2025	11.1673 min, 3.262 s	0.156	895
3-Ethyl-3-hexene	0.99	55.04	XIC(55.04Â±500ppm)	7770828	496	808	11.2506 min, 3.395 s	0.136	705
2H-Pyran-2-one	1.29	68.04	XIC(68.04Â±500ppm)	43647345	4548	3247	11.2506 min, 4.561 s	0.179	827
Methyl 2-furoate	1.15	95.01	XIC(95.01Â±500ppm)	66516878	2601	11167	11.5006 min, 3.437 s	0.144	936
1-Penten-3-one, 2-methyl-	0.78	41.05	XIC(41.05Â±500ppm)	81131705	7721	2627	11.584 min, 4.461 s	0.184	810
2-Butanone, 4-(1-piperidinyl)-	0.85	98.05	XIC(98.05Â±500ppm)	3911787	443	800	12.0007 min, 3.537 s	0.208	737
2-Hydroxy-gamma-butyrolactone	1.2	57.05	XIC(57.05Â±500ppm)	13986800	1407	1606	12.0007 min, 4.915 s	0.189	899
Propanedioic acid, propyl-	1.17	60.03	XIC(60.03Â±500ppm)	596974	152	114	12.084 min, 2.225 s	0.102	764
Pentanoic acid, 4-oxo-, methyl ester	1.06	43.04	XIC(43.04Â±500ppm)	17573237	713	657	12.084 min, 3.528 s	0.148	852
Benzene, 1,1'-(1-ethenyl-1,3-propanediyl)bis-	0.76	117.07	XIC(117.07Â±500ppm)	3152388	414	913	12.2507 min, 2.790 s	0.13	857
4,4-Dimethylcyclohexadienone	1.18	79.06	XIC(79.06Â±500ppm)	2698525	443	366	12.2507 min, 3.031 s	0.174	712
Benzofuran	1.09	118.04	XIC(118.04Â±500ppm)	13458385	1053	4517	12.334 min, 3.247 s	0.139	898
2-Furanmethanol, acetate	3.19	81.04	XIC(81.04Â±500ppm)	3651351	785	726	12.4174 min, 3.177 s	0.147	881
Carbamic acid, monoammonium salt	1.93	44.01	XIC(44.01Â±500ppm)	4225438	107	94	12.5007 min, 3.689 s	0.057	832
Pyridine, 3-methoxy-	2.66	109.05	XIC(109.05Â±500ppm)	25368228	996	1894	12.5841 min, 3.649 s	0.17	899
2-Furanone, 2,5-dihydro-3,5-dimethyl	1.24	69.04	XIC(69.04Â±500ppm)	58507345	4704	4568	12.5841 min, 3.974 s	0.182	874
Pyrazine, trimethyl-	2.99	42.05	XIC(42.05Â±500ppm)	8497067	386	283	12.6674 min, 3.092 s	0.178	822
1H-Pyrrole-2-carboxaldehyde, 1-methyl-	0.59	109.05	XIC(109.05Â±500ppm)	4530715	1136	617	12.7507 min, 3.851 s	0.167	845
Furan-2-carbonyl chloride, tetrahydro-	1.35	71.05	XIC(71.05Â±500ppm)	49798074	6319	5262	12.9174 min, 3.495 s	0.171	792
1H-Pyrrole-2-carboxaldehyde	1.23	95.03	XIC(95.03Â±500ppm)	12524181	1657	1509	12.9174 min, 3.960 s	0.147	922
Benzene, 1-methoxy-2-methyl-	1.07	122.07	XIC(122.07Â±500ppm)	2039915	181	676	13.0008 min, 2.993 s	0.144	756
3,4,5,6-Tetrahydrophthalic anhydride	1.23	79.06	XIC(79.06Â±500ppm)	4097815	1459	509	13.0841 min, 3.874 s	0.164	780
p-Benzoquinone, 2-methyl-	0.97	54.03	XIC(54.03Â±500ppm)	2140004	348	378	13.0841 min, 4.029 s	0.149	839
3-Ethenyl-3-methylcyclopentanone	1.19	68.04	XIC(68.04Â±500ppm)	12792990	2503	1391	13.1674 min, 3.871 s	0.185	747
Pyrazine, 2-ethenyl-6-methyl-	1.64	120.06	XIC(120.06Â±500ppm)	3047046	535	759	13.2508 min, 3.305 s	0.153	719
Pyridine, 2-ethyl-6-methyl-	5.74	120.08	XIC(120.08Â±500ppm)	1724533	451	575	13.3341 min, 2.963 s	0.156	765
Benzene, 1-methoxy-3-methyl-	1.11	122.07	XIC(122.07Â±500ppm)	18740853	2406	4317	13.4175 min, 3.061 s	0.135	926
Benzene, 1-ethenyl-2-methyl-	1.11	117.07	XIC(117.07Â±500ppm)	1231021	412	544	13.6675 min, 2.910 s	0.121	882
2-Cyclopenten-1-one, 2,3,4-trimethyl-	1.16	81.07	XIC(81.07Â±500ppm)	1749082	379	281	13.6675 min, 3.089 s	0.149	766
1,2-Cyclopentanedione, 3-methyl-	1.12	112.04	XIC(112.04Â±500ppm)	70698056	2498	5023	13.6675 min, 3.623 s	0.151	919
Cyclopentene, 3-methyl-1-(1-methylethyl)-	2.65	81.08	XIC(81.08Â±500ppm)	1283100	324	285	13.9175 min, 3.111 s	0.188	814
4(3H)-Pyrimidinone, 6-amino-2-methyl-	1.17	40.05	XIC(40.05Â±500ppm)	3585876	845	224	13.9175 min, 3.952 s	0.162	722
4-Methyl-2H-pyran	1.22	96.06	XIC(96.06Â±500ppm)	2550283	360	475	14.0008 min, 3.129 s	0.154	714
Benzyl alcohol	1.14	79.06	XIC(79.06Â±500ppm)	12582027	835	824	14.0842 min, 3.660 s	0.187	793
Resorcinol	1.41	110.03	XIC(110.03Â±500ppm)	6109857	489	849	14.0842 min, 4.297 s	0.172	779
2-Furancarboxylic acid, 3-methyl-, methyl ester	1.17	109.03	XIC(109.03Â±500ppm)	1581308	411	351	14.1675 min, 3.031 s	0.124	760
4-Oxohex-2-enal	1.17	83.04	XIC(83.04Â±500ppm)	15132462	3154	1914	14.2509 min, 4.293 s	0.167	881
2,5-Furandione, 3,4-dimethyl-	1.12	54.07	XIC(54.07Â±500ppm)	6442095	966	814	14.3342 min, 4.144 s	0.161	865
Benzene, 1-propynyl-	1.07	116.06	XIC(116.06Â±500ppm)	14684773	1601	3888	14.4175 min, 3.344 s	0.141	894
Benzaldehyde, 2-hydroxy-	1.15	122.03	XIC(122.03Â±500ppm)	8823888	1629	1833	14.4175 min, 3.701 s	0.149	924
2,5-Furandicarboxaldehyde	1.28	123.04	XIC(123.04Â±500ppm)	2125929	704	1047	14.5009 min, 3.536 s	0.154	742
4-Methyl-5H-furan-2-one	1.31	69.04	XIC(69.04Â±500ppm)	48321408	11062	4402	14.5009 min, 5.093 s	0.193	862
Ethylidenecycloheptane	2.9	96.06	XIC(96.06Â±500ppm)	992723	213	211	14.8342 min, 3.203 s	0.167	727
2H-Pyran-2-one, 4,6-dimethyl-	4	43.04	XIC(43.04Â±500ppm)	3160393	846	192	14.8342 min, 3.535 s	0.182	721
2-Cyclohexen-1-one, 4-hydroxy-	3.23	55.05	XIC(55.05Â±500ppm)	2553471	971	392	14.9176 min, 5.013 s	0.183	763
2H-Pyran-2-one, tetrahydro-	1.27	42.03	XIC(42.03Â±500ppm)	23868452	1744	835	14.9176 min, 5.283 s	0.206	891
2-Cyclopenten-1-one, 3-ethyl-2-hydroxy-	2.27	43.05	XIC(43.05Â±500ppm)	4994007	774	300	15.0009 min, 3.279 s	0.185	756
2-Cyclohexen-1-one, 3-methyl-	1.3	82.04	XIC(82.04Â±500ppm)	3846151	634	644	15.0009 min, 3.913 s	0.169	828
5-Ethyl-2-furaldehyde	1.13	124.05	XIC(124.05Â±500ppm)	1238505	315	626	15.1676 min, 3.595 s	0.128	826
Ethanone, 1-(1H-pyrrol-2-yl)-	1.27	94.03	XIC(94.03Â±500ppm)	7639290	1076	669	15.2509 min, 3.988 s	0.152	879
Acetic acid, phenyl ester	1.12	94.04	XIC(94.04Â±500ppm)	5127544	922	701	15.3343 min, 3.452 s	0.145	818
2,3,5-Trimethylcyclopent-2-enone	1.36	109.06	XIC(109.06Â±500ppm)	7633275	1163	1169	15.4176 min, 3.284 s	0.16	841
2-Furancarboxamide, N-methyl-N-isobutyl-	1.14	95.01	XIC(95.01Â±500ppm)	8730816	1938	1703	15.4176 min, 3.954 s	0.151	721
Bicyclo[3.2.0]hept-3-en-2-one	1.23	79.06	XIC(79.06Â±500ppm)	5108126	794	485	15.4176 min, 4.115 s	0.164	828
Benzoic acid, 4-amino-, 4-hydroximino-2,2,6,6-tetramethyl-1-piperidinyl ester	1.05	120.05	XIC(120.05Â±500ppm)	13392302	549	3543	15.501 min, 3.779 s	0.212	803
Ethanone, 2,2-dihydroxy-1-phenyl-	1.23	105.03	XIC(105.03Â±500ppm)	32237758	1355	4023	15.501 min, 3.813 s	0.147	870
Benzaldehyde, 2-methyl-	1.23	91.05	XIC(91.05Â±500ppm)	21993271	1751	1715	15.5843 min, 3.657 s	0.147	892
1H-Pyrazole, 3-methyl-	1.13	81.04	XIC(81.04Â±500ppm)	7369555	1446	881	15.6676 min, 4.112 s	0.178	715
2-Piperidinone, 6-methyl-	1.03	42.06	XIC(42.06Â±500ppm)	5948324	1642	296	15.6676 min, 5.375 s	0.208	751
Cyclohexanone, 3-ethenyl-	1.06	124.05	XIC(124.05Â±500ppm)	4369437	583	1173	15.751 min, 4.110 s	0.144	814
2,3-Dimethyl-4-hydroxy-2-butenoic lactone	1.23	55.07	XIC(55.07Â±500ppm)	10520600	466	809	15.8343 min, 4.396 s	0.169	737
2-Hydroxy-3,5-dimethylcyclopent-2-en-1-one	1.19	55.07	XIC(55.07Â±500ppm)	1871366	591	170	15.9177 min, 3.404 s	0.156	752
2-Cyclopenten-1-one, 3-ethyl-	1.52	81.04	XIC(81.04Â±500ppm)	15279709	1514	1633	15.9177 min, 3.883 s	0.156	827
Phenol, 3-methyl-	1.26	107.04	XIC(107.04Â±500ppm)	206418006	5018	6151	16.0843 min, 3.255 s	0.142	941
Benzofuran, 2,3-dihydro-	1.02	120.05	XIC(120.05Â±500ppm)	10878359	752	2452	16.0843 min, 3.797 s	0.141	773
Heptanoic acid	1.24	60.03	XIC(60.03Â±500ppm)	1117794	338	264	16.1677 min, 2.365 s	0.095	907
Benzene, 1-methyl-3-(1-methylethenyl)-	1.06	117.07	XIC(117.07Â±500ppm)	708738	276	252	16.3344 min, 2.845 s	0.144	837
4,5-Nonadiene	1.69	96.06	XIC(96.06Â±500ppm)	2706787	368	493	16.501 min, 3.450 s	0.158	747
Hexanoic acid, 4-oxo-, methyl ester	1	57.05	XIC(57.05Â±500ppm)	999903	194	197	16.501 min, 3.511 s	0.155	755
Phenol, 2-methoxy-	1.22	109.02	XIC(109.02Â±500ppm)	229168468	3064	6862	16.5844 min, 3.644 s	0.153	910
Cyclopropyl carbinol	1.2	44.04	XIC(44.04Â±500ppm)	113834850	1403	1007	16.6677 min, 5.257 s	0.169	759
2,5-Pyrrolidinedione, 1-methyl-	1.39	113.04	XIC(113.04Â±500ppm)	15590384	5339	3720	16.6677 min, 5.455 s	0.207	864
Benzoic acid, methyl ester	1.16	105.03	XIC(105.03Â±500ppm)	12892361	938	1814	16.8344 min, 3.508 s	0.139	935
3(2H)-Pyridazinone, 6-methyl-	1.55	82.05	XIC(82.05Â±500ppm)	3290251	1100	441	16.8344 min, 4.780 s	0.193	781
4-Hepten-3-one, 4-methyl-	1.29	97.03	XIC(97.03Â±500ppm)	13896087	1983	2334	16.9177 min, 3.924 s	0.158	825
Cinnamaldehyde, (E)-	1.06	131.05	XIC(131.05Â±500ppm)	9921620	789	2547	17.0011 min, 3.349 s	0.139	862
2-Cyclopenten-1-one, 3,4,5-trimethyl-	1.46	109.05	XIC(109.05Â±500ppm)	2642926	379	363	17.0844 min, 3.487 s	0.153	786
2-Ethyl-3-methylcyclopent-2-en-1-one	3.08	81.07	XIC(81.07Â±500ppm)	3635393	581	622	17.2511 min, 3.494 s	0.163	783
2-Cyclohexen-1-one, 4,4-dimethyl-	1.17	68.04	XIC(68.04Â±500ppm)	7284456	518	680	17.2511 min, 3.830 s	0.135	755
Benzene, 1-isocyano-4-methyl-	1.38	117.05	XIC(117.05Â±500ppm)	1869907	509	547	17.2511 min, 3.884 s	0.145	850
2-Methyl-1-octen-3-yne	3.75	79.06	XIC(79.06Â±500ppm)	2987146	612	419	17.3344 min, 3.490 s	0.139	705
Bicyclo[5.3.0]decane (cis)	1.09	138.06	XIC(138.06Â±500ppm)	1488946	211	613	17.3344 min, 3.713 s	0.18	736
Benzofuran, 2-methyl-	1.05	131.05	XIC(131.05Â±500ppm)	35765353	2558	5771	17.4178 min, 3.386 s	0.131	902
Phenol, 2,4-dimethyl-	1.14	107.05	XIC(107.05Â±500ppm)	13610191	894	1161	17.4178 min, 3.428 s	0.144	807
3-Furonitrile, 2-amino-4,5-dimethyl-	1.04	135.04	XIC(135.04Â±500ppm)	2550130	285	115	17.4178 min, 3.461 s	0.131	764
Benzocyclobuten-1(2H)-one	1.11	90.05	XIC(90.05Â±500ppm)	1641117	682	532	17.4178 min, 4.128 s	0.151	845
2,5-Dimethylanisole	1.73	136.09	XIC(136.09Â±500ppm)	7258954	973	657	17.5845 min, 2.994 s	0.143	908
Pentane, 1-propoxy-	1.31	43.04	XIC(43.04Â±500ppm)	75132508	6686	2267	17.5845 min, 4.107 s	0.169	745
2,5-Cyclohexadiene-1,4-dione, 2,6-dimethyl-	0.83	68.04	XIC(68.04Â±500ppm)	1191346	263	175	17.6678 min, 3.956 s	0.166	749
Phenol, 2-ethyl-5-methyl-	1.06	121.06	XIC(121.06Â±500ppm)	5009939	662	646	17.7511 min, 3.133 s	0.119	748
Levoglucosenone	1.09	68.04	XIC(68.04Â±500ppm)	4979426	887	602	17.7511 min, 4.801 s	0.189	884
1,3-Benzodioxol-2-one	1.07	64.04	XIC(64.04Â±500ppm)	2846584	653	247	17.9178 min, 4.031 s	0.135	892
3,5-Dimethylanisole	1.12	136.09	XIC(136.09Â±500ppm)	3331170	528	1124	18.0012 min, 3.100 s	0.134	785
Furan, 2-propyl-	1.21	81.03	XIC(81.03Â±500ppm)	1507636	461	293	18.1678 min, 4.987 s	0.17	711
2H-Pyran-3(4H)-one, dihydro-6-methyl-	1.07	56.04	XIC(56.04Â±500ppm)	27769619	1395	2843	18.1678 min, 6.496 s	0.219	748
o-Isopropenyltoluene	1.21	117.07	XIC(117.07Â±500ppm)	1714282	647	664	18.2512 min, 2.954 s	0.146	885
Benzyl methyl ketone	0.86	43.04	XIC(43.04Â±500ppm)	4345494	401	286	18.4179 min, 3.854 s	0.195	808
2(3H)-Furanone, 5-acetyldihydro-	1.08	85.03	XIC(85.03Â±500ppm)	24195862	2307	3859	18.4179 min, 5.476 s	0.19	889
1-Propanone, 1-(5-methyl-2-furanyl)-	1.52	109.04	XIC(109.04Â±500ppm)	3492404	444	704	18.5845 min, 3.538 s	0.184	763
2-Ethylidenecyclohexanone	0.94	67.06	XIC(67.06Â±500ppm)	737470	208	121	18.7512 min, 4.763 s	0.163	735
Ethanone, 1-(3-methylphenyl)-	2.39	91.05	XIC(91.05Â±500ppm)	2174088	356	340	18.8346 min, 3.637 s	0.159	801
3-Methylene-2-norbornanone	0.52	79.06	XIC(79.06Â±500ppm)	2832462	238	307	18.8346 min, 3.886 s	0.169	752
Benzyl nitrile	1.22	117.06	XIC(117.06Â±500ppm)	5280790	386	1380	18.9179 min, 4.488 s	0.162	943
Phenol, 2-ethyl-	1.16	107.05	XIC(107.05Â±500ppm)	16480650	1945	2070	19.0012 min, 3.258 s	0.125	904
Pentanedioic acid, dimethyl ester	1.1	59.05	XIC(59.05Â±500ppm)	1156068	322	348	19.0012 min, 3.324 s	0.119	905
2-Hepten-4-one, 2-methyl-	0.79	55.07	XIC(55.07Â±500ppm)	5245540	818	514	19.0846 min, 4.247 s	0.185	771
Benzene, pentamethyl-	1.06	133.1	XIC(133.10Â±500ppm)	1074420	260	387	19.1679 min, 2.653 s	0.134	755
1-Methylenespiro[2.4]heptan-4-one	1.43	79.06	XIC(79.06Â±500ppm)	1540957	283	207	19.1679 min, 4.074 s	0.18	705
1H-Indene, 3-methyl-	0.97	130.08	XIC(130.08Â±500ppm)	12829718	1129	4695	19.3346 min, 3.348 s	0.126	922
Benzene, 1,2-dimethoxy-	1.37	138.07	XIC(138.07Â±500ppm)	8289379	1270	2228	19.4179 min, 3.821 s	0.157	885
Phenol, 2,6-dimethyl-	1.18	107.05	XIC(107.05Â±500ppm)	52277198	3342	3754	19.5013 min, 3.287 s	0.126	916
4-Hexen-3-one, 5-methyl-	1.33	83.05	XIC(83.05Â±500ppm)	5091471	735	690	19.5013 min, 4.906 s	0.172	820
1,4-Dioxaspiro[2.4]heptan-5-one, 6-methyl-	1.08	42.06	XIC(42.06Â±500ppm)	72229637	3628	2589	19.5013 min, 5.727 s	0.204	729
1H-Indene, 1-methyl-	1.15	130.07	XIC(130.07Â±500ppm)	12782808	1283	3557	19.5846 min, 3.385 s	0.178	916
Benzaldehyde, 2-hydroxy-4-methyl-	1.11	136.05	XIC(136.05Â±500ppm)	2754269	374	885	19.668 min, 3.668 s	0.13	799
1,4-Dihydronaphthalene	1.05	128.06	XIC(128.06Â±500ppm)	2161333	335	589	20.0013 min, 3.581 s	0.139	851
Benzaldehyde, 3-ethyl-	1.25	134.07	XIC(134.07Â±500ppm)	947629	351	474	20.0013 min, 3.609 s	0.136	803
Ethanone, 1-(2-hydroxyphenyl)-	1.03	121.03	XIC(121.03Â±500ppm)	1811327	397	563	20.0013 min, 3.874 s	0.141	745
N(N'-Methyl-N'-nitroso(aminomethyl))benzamide	1.2	105.03	XIC(105.03Â±500ppm)	2927707	667	627	20.168 min, 3.680 s	0.14	855
Benzene, 1,3-dimethoxy-	1.16	138.06	XIC(138.06Â±500ppm)	3475371	521	1922	20.2513 min, 3.724 s	0.139	882
Benzene, 1,4-diethyl-2-methyl-	0.2	44.01	XIC(44.01Â±500ppm)	1984803	233	40	20.3347 min, 2.757 s	0.12	717
1-Methylcyclooctene	1.42	81.05	XIC(81.05Â±500ppm)	1297218	208	272	20.3347 min, 3.727 s	0.134	777
Phenol, 3,4-dimethyl-	1.2	107.05	XIC(107.05Â±500ppm)	89896023	2572	4855	20.418 min, 3.306 s	0.125	900
Ethanone, 1-(4-methylphenyl)-	1.25	119.05	XIC(119.05Â±500ppm)	5957367	1262	1486	20.5014 min, 3.716 s	0.14	874
Benzaldehyde, 2,4-dimethyl-	1	133.06	XIC(133.06Â±500ppm)	1529732	214	511	20.5847 min, 3.625 s	0.141	875
2-Cyclohexen-1-one, 4,5-dimethyl-	1.27	82.01	XIC(82.01Â±500ppm)	1463326	334	364	20.668 min, 4.374 s	0.154	795
Naphthalene, 1,2-dihydro-4-methyl-	0.98	129.07	XIC(129.07Â±500ppm)	1387014	258	644	20.7514 min, 3.175 s	0.132	843
2-Methoxy-6-methylphenol	1.17	123.04	XIC(123.04Â±500ppm)	10961536	2677	2384	20.7514 min, 3.516 s	0.132	874
Phenol, 2,3-dimethyl-	1.19	107.05	XIC(107.05Â±500ppm)	11520728	1077	1462	20.8347 min, 3.450 s	0.13	869
1H-Indene, 2,3-dihydro-4,7-dimethyl-	0.63	131.08	XIC(131.08Â±500ppm)	1218513	221	353	20.9181 min, 2.926 s	0.122	809
Ethyl-2-benzofuran	1.04	131.05	XIC(131.05Â±500ppm)	3081985	852	1310	20.9181 min, 3.350 s	0.129	808
Phenol, 2-ethyl-6-methyl-	1.25	121.06	XIC(121.06Â±500ppm)	4098977	504	867	21.0847 min, 3.394 s	0.132	830
2-Methoxy-5-methylphenol	1.04	123.04	XIC(123.04Â±500ppm)	3567020	403	883	21.1681 min, 3.539 s	0.125	900
Cyclopropane, pentyl-	1.12	42.06	XIC(42.06Â±500ppm)	7005772	1638	335	21.1681 min, 5.377 s	0.197	705
2-Propenal, 3-(4-methylphenyl)-	1.02	131.05	XIC(131.05Â±500ppm)	854052	112	295	21.2514 min, 3.993 s	0.133	723
Benzo[c]thiophene	1.06	134.02	XIC(134.02Â±500ppm)	1818221	463	944	21.2514 min, 4.156 s	0.142	926
3(2H)-Furanone, dihydro-5-isopropyl-	1.06	55.06	XIC(55.06Â±500ppm)	4962612	825	342	21.3348 min, 5.533 s	0.229	746
2-Ethyl-2,3-dihydro-1H-indene	0.79	117.07	XIC(117.07Â±500ppm)	441129	125	170	21.4181 min, 3.005 s	0.132	761
Creosol	1.16	123.04	XIC(123.04Â±500ppm)	71411190	2100	5357	21.4181 min, 3.542 s	0.137	915
1H-Indene, 2,3-dihydro-1,1-dimethyl-	0.98	131.08	XIC(131.08Â±500ppm)	1049598	282	362	21.5848 min, 3.038 s	0.132	781
Benzofuran, 4,7-dimethyl-	1.07	146.07	XIC(146.07Â±500ppm)	5409067	1454	2973	21.8348 min, 3.331 s	0.13	845
Phenol, 2,4,6-trimethyl-	1.17	121.06	XIC(121.06Â±500ppm)	4153002	545	1026	21.9181 min, 3.397 s	0.128	882
4-Hexen-3-one, 4,5-dimethyl-	2.9	41.06	XIC(41.06Â±500ppm)	899598	179	78	21.9181 min, 4.427 s	0.176	742
Benzoic acid, 3-methyl-, methyl ester	1.15	119.05	XIC(119.05Â±500ppm)	2950215	677	829	22.0015 min, 3.479 s	0.127	907
2-Ethyl-4-methylanisole	1.1	135.08	XIC(135.08Â±500ppm)	1149627	268	231	22.1682 min, 3.054 s	0.118	807
2-Hydroxy-3-propyl-2-cyclopenten-1-one	0.84	55.06	XIC(55.06Â±500ppm)	1404113	111	132	22.1682 min, 3.426 s	0.113	723
p-Toluidine, N-methyl-N-nitroso-	1.15	120.05	XIC(120.05Â±500ppm)	3335904	864	1053	22.3348 min, 3.543 s	0.123	763
2-Propenal, 3-(2-furanyl)-	1.33	122.03	XIC(122.03Â±500ppm)	2882220	1105	739	22.3348 min, 5.118 s	0.178	736
1,4-Cyclohexadiene-1,2-dicarboxylic anhydride	1.17	78.05	XIC(78.05Â±500ppm)	1380911	177	101	22.5015 min, 3.862 s	0.129	754
Tricyclo[4.2.1.1(2,5)]deca-3,7-diene-9,10-dione, (1a,2ÃŸ,5ÃŸ,6a)-	1.09	131.05	XIC(131.05Â±500ppm)	9539546	1866	1828	22.5849 min, 4.634 s	0.169	860
3,4-Anhydro-d-galactosan	0.58	43.04	XIC(43.04Â±500ppm)	3898699	477	186	22.5849 min, 5.025 s	0.182	810
Benzothiazole	2.2	135.01	XIC(135.01Â±500ppm)	1008450	209	242	22.7515 min, 4.660 s	0.178	749
Indan, epoxide	1.31	104.06	XIC(104.06Â±500ppm)	1479539	326	324	22.8349 min, 4.321 s	0.142	864
2,3-Anhydro-d-mannosan	1.1	71.02	XIC(71.02Â±500ppm)	6584671	1116	1307	22.9182 min, 4.894 s	0.179	840
Nonanoic acid, methyl ester	1.13	74.04	XIC(74.04Â±500ppm)	451811	136	104	23.0016 min, 2.424 s	0.085	782
1H-Benzimidazole, 5,6-dimethyl-	1.03	131.05	XIC(131.05Â±500ppm)	1481266	412	598	23.0016 min, 3.455 s	0.121	769
Valeric acid, 2-tetrahydrofurylmethyl ester	1.32	71.06	XIC(71.06Â±500ppm)	6914305	1204	1218	23.0849 min, 4.033 s	0.158	778
Benzofuran, 2-ethenyl-	1.06	144.05	XIC(144.05Â±500ppm)	4641161	685	1793	23.1682 min, 3.628 s	0.12	843
m-Guaiacol	1.22	124.05	XIC(124.05Â±500ppm)	3656685	842	667	23.1682 min, 3.860 s	0.134	786
2-Coumaranone	1.12	78.05	XIC(78.05Â±500ppm)	6168606	510	290	23.2516 min, 4.688 s	0.146	772
2-Ethyltetrahydrofuran	1.24	71.06	XIC(71.06Â±500ppm)	3655468	610	695	23.3349 min, 4.124 s	0.165	784
Quinoline	2.65	129.05	XIC(129.05Â±500ppm)	5981346	991	1236	23.3349 min, 4.470 s	0.174	938
1H-Indazole, 5,7-dimethyl-	1.03	131.05	XIC(131.05Â±500ppm)	2033280	319	483	23.4183 min, 3.487 s	0.135	773
1,4-Benzenedicarboxaldehyde, 2-methyl-	1.07	148.05	XIC(148.05Â±500ppm)	681332	215	339	23.5016 min, 3.758 s	0.122	722
5-(Hydroxymethyl)dihydrofuran-2(3H)-one	1.15	85.03	XIC(85.03Â±500ppm)	12326943	2198	2206	23.5016 min, 5.212 s	0.175	787
Phenol, 4-ethyl-3-methyl-	1.15	121.06	XIC(121.06Â±500ppm)	16513904	2127	1997	23.5849 min, 3.303 s	0.118	884
1-Benzofuran-5-ol	1.17	134.03	XIC(134.03Â±500ppm)	3355362	757	1060	23.5849 min, 3.985 s	0.136	898
Benzenepropanenitrile	1.45	91.05	XIC(91.05Â±500ppm)	5274973	929	594	23.5849 min, 4.599 s	0.164	862
3,4-Dimethoxytoluene	1.46	152.08	XIC(152.08Â±500ppm)	11383783	2527	2095	23.6683 min, 3.611 s	0.141	895
4-Acetyl-1-methylcyclohexene	1.16	43.04	XIC(43.04Â±500ppm)	2414888	283	166	23.6683 min, 4.531 s	0.152	715
Naphthalene, 1,2-dihydro-2-methyl-	1.11	129.07	XIC(129.07Â±500ppm)	2074772	311	476	23.7516 min, 3.330 s	0.123	759
Phenol, 3-ethyl-5-methyl-	1.21	121.06	XIC(121.06Â±500ppm)	2926171	724	688	23.835 min, 3.269 s	0.114	868
Furan, 2,5-dimethyl-	1.27	43.04	XIC(43.04Â±500ppm)	4810366	743	348	23.9183 min, 4.852 s	0.198	746
Phenol, 2-ethyl-4,5-dimethyl-	2.14	135.04	XIC(135.04Â±500ppm)	2813952	1489	764	24.0016 min, 3.519 s	0.129	765
2,3-Methylenedioxyanisole	0.95	151.04	XIC(151.04Â±500ppm)	1708649	184	746	24.0016 min, 4.123 s	0.252	701
2(3H)-Benzofuranone, 3-methyl-	1.08	120.06	XIC(120.06Â±500ppm)	1978833	539	696	24.0016 min, 4.247 s	0.144	894
2,6-Dimethoxytoluene	1.15	152.08	XIC(152.08Â±500ppm)	1431164	183	490	24.335 min, 3.516 s	0.124	863
1H-1,2,4-Triazol-3-amine, 1-methyl-	2.51	43.05	XIC(43.05Â±500ppm)	16032023	1026	887	24.4183 min, 3.649 s	0.129	729
Benzene, hexyl-	1.06	91.05	XIC(91.05Â±500ppm)	2654911	716	327	24.5017 min, 2.607 s	0.094	920
Phenol, 4-propyl-	1.17	107.05	XIC(107.05Â±500ppm)	3780424	652	918	24.5017 min, 3.261 s	0.113	858
1H-1,2,4-Triazol-5-amine, 1-methyl-	1.58	43.05	XIC(43.05Â±500ppm)	7256671	1339	466	24.5017 min, 3.623 s	0.132	717
Phenol, 4-ethyl-2-methoxy-	0.55	137.06	XIC(137.06Â±500ppm)	1476580	208	596	24.585 min, 3.448 s	0.117	767
2-Methyl-5-hydroxybenzofuran	1.12	148.05	XIC(148.05Â±500ppm)	1194222	386	630	24.7517 min, 3.803 s	0.126	733
Benzene, (1,3-dimethylbutyl)-	1.14	105.07	XIC(105.07Â±500ppm)	1280857	349	326	24.835 min, 2.665 s	0.1	850
Phenol, 3,4,5-trimethyl-	1.51	121.06	XIC(121.06Â±500ppm)	2534739	289	814	24.835 min, 3.406 s	0.118	772
3,5-Dimethoxytoluene	1.16	152.08	XIC(152.08Â±500ppm)	13282199	2952	2908	24.835 min, 3.551 s	0.131	912
2H-Pyran-2-one, 5,6-dihydro-6-propyl-	1.24	68.03	XIC(68.03Â±500ppm)	2537396	550	493	24.835 min, 4.315 s	0.154	904
o-Toluic acid, 4-nitrophenyl ester	1.22	119.05	XIC(119.05Â±500ppm)	819020	212	248	25.0017 min, 3.519 s	0.118	770
1-Naphthalenol	1.01	115.06	XIC(115.06Â±500ppm)	1293390	198	372	25.0017 min, 4.005 s	0.123	786
Benzofuran-2-carboxaldehyde	1.27	146.03	XIC(146.03Â±500ppm)	707719	397	397	25.0017 min, 4.484 s	0.147	736
Ethanone, 1-(2,5-dihydroxyphenyl)-	1.06	137.02	XIC(137.02Â±500ppm)	1048844	325	475	25.1684 min, 3.915 s	0.129	776
1H-Inden-1-one, 2,3-dihydro-	1.31	104.06	XIC(104.06Â±500ppm)	18344324	2979	2585	25.2517 min, 4.707 s	0.165	894
2(3H)-Furanone, 3-acetyldihydro-3-methyl-	1.21	43.04	XIC(43.04Â±500ppm)	4902066	555	285	25.3351 min, 5.507 s	0.203	774
Ethanone, 1-[4-(1-methylethenyl)phenyl]-	1.06	145.06	XIC(145.06Â±500ppm)	2740888	438	883	25.6684 min, 3.271 s	0.125	782
1H-Inden-1-one, 2,3-dihydro-3-methyl-	1.25	117.07	XIC(117.07Â±500ppm)	3785865	999	609	25.6684 min, 4.271 s	0.162	824
1H-Indene, 2,3-dihydro-1,1,3-trimethyl-	1.08	145.06	XIC(145.06Â±500ppm)	2235333	545	1255	26.0018 min, 3.277 s	0.123	823
Phenol, 2,3,4,6-tetramethyl-	1.16	135.08	XIC(135.08Â±500ppm)	1463061	326	431	26.0018 min, 3.329 s	0.117	742
1,3-Di-O-acetyl-a-ÃŸ-d-ribopyranose	1.1	43.04	XIC(43.04Â±500ppm)	17207827	633	703	26.2518 min, 4.119 s	0.14	738
Phenol, 3,4,5-trimethyl-, methylcarbamate	1.12	121.06	XIC(121.06Â±500ppm)	990862	286	316	26.4185 min, 3.576 s	0.122	845
Benzaldehyde, 2-hydroxy-3-methoxy-	1.07	152.05	XIC(152.05Â±500ppm)	530560	192	210	26.5852 min, 4.342 s	0.132	820
1H-Inden-1-one, 2,3-dihydro-3,3-dimethyl-	1.17	145.06	XIC(145.06Â±500ppm)	10593578	1320	2392	26.7519 min, 3.278 s	0.118	793
5-Acetoxymethyl-2-furaldehyde	1.04	126.03	XIC(126.03Â±500ppm)	2214485	615	806	26.7519 min, 4.277 s	0.134	849
Naphthalene, 1,2-dihydro-7-methoxy-	1.08	145.06	XIC(145.06Â±500ppm)	3884824	745	953	26.9185 min, 3.266 s	0.118	740
2-Methoxy-4-vinylphenol	1.14	150.07	XIC(150.07Â±500ppm)	4884769	892	1226	26.9185 min, 3.695 s	0.126	907
1,2,3-Trimethoxybenzene	1.5	168.08	XIC(168.08Â±500ppm)	2156878	750	954	27.0019 min, 3.915 s	0.154	797
2,5,6-Trimethylbenzimidazole	0.9	160.08	XIC(160.08Â±500ppm)	896068	229	693	27.0852 min, 3.316 s	0.115	778
3,4-Dimethylanisole	1.18	121.06	XIC(121.06Â±500ppm)	663510	184	213	27.0852 min, 3.571 s	0.116	719
2-Furanol, tetrahydro-2-methyl-	1.44	71.06	XIC(71.06Â±500ppm)	2846500	853	680	27.0852 min, 3.817 s	0.168	735
1H-Inden-5-ol, 2,3-dihydro-	2.34	134.07	XIC(134.07Â±500ppm)	1017369	174	351	27.0852 min, 3.924 s	0.135	757
1,4-Benzodioxin, 2,3-dihydro-	2.54	52.05	XIC(52.05Â±500ppm)	955857	412	115	27.1686 min, 5.232 s	0.179	718
Muco-Inositol	2.45	73.04	XIC(73.04Â±500ppm)	756337	173	242	27.1686 min, 6.139 s	0.048	710
3-Methoxy-5-methylphenol	1.13	138.07	XIC(138.07Â±500ppm)	4016347	829	1134	27.3352 min, 3.786 s	0.129	903
Benzo[1,2-b:4,3-b']difuran	1.03	158.03	XIC(158.03Â±500ppm)	630514	354	496	27.3352 min, 4.065 s	0.132	812
Acetic acid, 3-[1,3]dioxolan-2-ylpropyl ester	2.36	73.05	XIC(73.05Â±500ppm)	924761	219	224	27.3352 min, 6.139 s	0.046	703
Benzene, 4-ethyl-1,2-dimethoxy-	1.36	151.07	XIC(151.07Â±500ppm)	2056239	1116	789	27.4186 min, 3.482 s	0.132	854
2,5-Dimethoxyethylbenzene	1.23	151.07	XIC(151.07Â±500ppm)	645381	256	292	27.6686 min, 3.237 s	0.114	707
1-Naphthalenol, 2-methyl-	0.96	158.07	XIC(158.07Â±500ppm)	1189679	361	754	27.6686 min, 3.520 s	0.124	748
3,5-Dimethoxy-4-hydroxytoluene	1.18	153.06	XIC(153.06Â±500ppm)	644092	210	256	28.0853 min, 3.639 s	0.125	722
1(3H)-Isobenzofuranone	1.35	105.03	XIC(105.02Â±500ppm)	3864887	837	708	28.252 min, 5.448 s	0.186	951
7-Methylindan-1-one	1.33	146.07	XIC(146.07Â±500ppm)	2789137	981	1019	28.3353 min, 4.340 s	0.158	826
Benzaldehyde, 4-ethoxy-	2.79	121.06	XIC(121.06Â±500ppm)	606190	267	227	28.4187 min, 3.214 s	0.127	702
1,4-Dioxane, 2,3-dimethoxy-	1.09	61.02	XIC(61.02Â±500ppm)	961289	122	446	28.4187 min, 6.132 s	0.047	723
Phenol, 2,6-dimethoxy-	1.13	154.06	XIC(154.06Â±500ppm)	133253735	2783	6870	28.502 min, 4.283 s	0.148	899
Phenol, 3-methoxy-2,4,5-trimethyl-	2.42	166.1	XIC(166.10Â±500ppm)	6087640	497	2343	28.5853 min, 3.290 s	0.121	809
Durohydroquinone	0.51	166.1	XIC(166.10Â±500ppm)	1807054	145	905	28.5853 min, 3.441 s	0.119	727
Phenol, 2-methoxy-3-(2-propenyl)-	1.13	164.08	XIC(164.08Â±500ppm)	11815199	1910	3069	28.8354 min, 3.483 s	0.119	911
Ethanone, 1-(3,4-dimethylphenyl)-	1.54	105.03	XIC(105.03Â±500ppm)	1959069	368	411	28.9187 min, 4.915 s	0.173	763
Benzene, heptyl-	1.06	92.06	XIC(92.06Â±500ppm)	1501891	508	384	29.002 min, 2.577 s	0.084	901
Phenol, 4-methoxy-2,3,6-trimethyl-	1.18	151.07	XIC(151.07Â±500ppm)	2807524	538	437	29.002 min, 3.250 s	0.116	728
6-Methoxy-3-methylbenzofuran	1.06	162.06	XIC(162.06Â±500ppm)	4826839	730	2383	29.002 min, 3.852 s	0.131	792
1-Methyl-2-n-hexylbenzene	1.08	105.07	XIC(105.07Â±500ppm)	972315	331	247	29.2521 min, 2.626 s	0.097	842
Phenol, 2-methoxy-4-propyl-	1.12	137.06	XIC(137.06Â±500ppm)	16465225	2083	3022	29.2521 min, 3.286 s	0.112	886
Benzene, 4-ethenyl-1,2-dimethoxy-	1.25	164.08	XIC(164.08Â±500ppm)	919985	253	514	29.3354 min, 3.737 s	0.128	860
1,2,3-Trimethylindene	1.19	143.08	XIC(143.08Â±500ppm)	594641	265	346	29.4187 min, 3.269 s	0.11	703
1,4-Benzenediol, 2,3,5-trimethyl-	2.28	152.08	XIC(152.08Â±500ppm)	904788	192	259	29.7521 min, 3.623 s	0.123	737
Benzeneethanamine, 4-methoxy-N-[2-(4-methoxyphenyl)ethyl]-	1.09	164.08	XIC(164.08Â±500ppm)	1430164	430	920	29.8354 min, 3.636 s	0.125	741
Propanoic acid, 2-methyl-, anhydride	2.61	71.06	XIC(71.06Â±500ppm)	2201519	308	415	29.8354 min, 3.866 s	0.147	735
Hydrocoumarin	1.2	148.05	XIC(148.05Â±500ppm)	1032946	236	356	29.8354 min, 5.070 s	0.157	840
3-Tetradecene, (E)-	1.25	55.07	XIC(55.07Â±500ppm)	1346359	248	153	30.0855 min, 1.990 s	0.074	918
Naphthalene, 2-ethyl-	1.05	141.07	XIC(141.07Â±500ppm)	4847687	1207	1846	30.1688 min, 3.649 s	0.118	857
m-Cresol, TMS derivative	1.2	165.09	XIC(165.09Â±500ppm)	667547	264	362	30.2521 min, 3.164 s	0.116	704
Naphthalene, 1-ethyl-	1.06	141.07	XIC(141.07Â±500ppm)	3545624	619	1642	30.3355 min, 3.789 s	0.128	880
Propanoic acid, 2-mercapto-, methyl ester	1.19	61.03	XIC(61.03Â±500ppm)	2040497	122	674	30.3355 min, 6.119 s	0.043	702
1,1'-Biphenyl, 2-methyl-	1.11	168.09	XIC(168.09Â±500ppm)	853786	529	609	30.5022 min, 3.589 s	0.119	863
Vanillin	1.13	151.04	XIC(151.04Â±500ppm)	17857854	3849	2614	30.5022 min, 4.609 s	0.152	934
Coumarin	1.53	118.04	XIC(118.04Â±500ppm)	962327	381	217	30.5022 min, 5.098 s	0.185	827
Naphthalene, 1,7-dimethyl-	1.05	156.09	XIC(156.09Â±500ppm)	7608026	1290	3020	30.5855 min, 3.645 s	0.121	922
Biphenylene	1.14	152.06	XIC(152.06Â±500ppm)	1029586	242	217	30.5855 min, 4.086 s	0.13	752
1H-Inden-1-one, 2,3-dihydro-3,4,7-trimethyl-	1.12	159.08	XIC(159.08Â±500ppm)	2265362	475	812	30.7522 min, 3.158 s	0.107	736
Benzene, 1,2,3-trimethoxy-5-methyl-	1.5	167.07	XIC(167.07Â±500ppm)	5818652	853	1576	30.9189 min, 3.670 s	0.14	902
Naphthalene, 1,2,3,4-tetrahydro-6,7-dimethyl-	0.51	145.06	XIC(145.06Â±500ppm)	497241	114	253	31.1689 min, 4.010 s	0.132	749
1H-Isoindole-1,3(2H)-dione, 2-methyl-	1.29	161.04	XIC(161.04Â±500ppm)	1321713	509	468	31.4189 min, 4.827 s	0.166	893
Methyl glyoxal	1.27	43.04	XIC(43.04Â±500ppm)	50239516	1038	1876	31.4189 min, 6.107 s	0.036	786
Phenol, 2-(2-pentyn-4-yl)-4-methyl-	2.08	159.08	XIC(159.08Â±500ppm)	500776	270	249	31.5022 min, 3.211 s	0.116	777
Naphthalene, 2,6-dimethyl-	1.01	156.09	XIC(156.09Â±500ppm)	1330861	365	805	32.169 min, 3.911 s	0.128	893
3-Penten-2-one, 4-phenyl-	0.55	145.06	XIC(145.06Â±500ppm)	382551	164	188	32.2523 min, 4.258 s	0.148	706
Acenaphthylene	1.08	152.06	XIC(152.06Â±500ppm)	26679207	1772	5150	32.3356 min, 4.462 s	0.144	965
Phenol, 2-methoxy-4-(1-propenyl)-	1.14	164.08	XIC(164.08Â±500ppm)	839633	333	510	32.669 min, 3.636 s	0.115	873
3-Buten-2-one, 4-(4-methoxyphenyl)-	1.06	161.06	XIC(161.06Â±500ppm)	1699342	554	995	32.669 min, 3.711 s	0.127	726
Benzene, 1,2-dimethoxy-4-(1-propenyl)-	1.56	178.1	XIC(178.10Â±500ppm)	476759	365	371	33.0857 min, 3.368 s	0.117	713
Benzene, octyl-	1.08	92.06	XIC(92.06Â±500ppm)	1076753	414	345	33.3357 min, 2.540 s	0.082	898
3-Benzofurancarboxaldehyde, 2-methoxy-	1.15	176.08	XIC(176.08Â±500ppm)	1620554	472	1010	33.4191 min, 3.756 s	0.127	771
1H-Inden-1-one, 2,3-dihydro-4,7-dimethyl-	1.24	160.09	XIC(160.09Â±500ppm)	490834	238	285	33.7524 min, 4.209 s	0.149	794
Acenaphthene	1.06	153.07	XIC(153.07Â±500ppm)	1701900	913	596	33.8358 min, 4.277 s	0.149	933
1,1'-Biphenyl, 4-methyl-	1.06	168.09	XIC(168.09Â±500ppm)	3358974	762	1563	34.0024 min, 3.688 s	0.121	916
7-Methoxy-1-naphthol	1.07	174.07	XIC(174.07Â±500ppm)	599906	201	589	34.0858 min, 3.962 s	0.123	809
Apocynin	1.13	151.04	XIC(151.04Â±500ppm)	3697904	535	1121	34.0858 min, 4.456 s	0.137	848
6-Tridecene, (Z)-	1.43	55.07	XIC(55.07Â±500ppm)	451778	128	84	34.1691 min, 1.987 s	0.087	901
1-Naphthalenecarbonitrile	1.77	153.06	XIC(153.06Â±500ppm)	3038676	1147	793	34.2525 min, 4.814 s	0.175	928
1-Naphthalenecarboxaldehyde	1.26	127.05	XIC(127.05Â±500ppm)	406035	136	171	34.5858 min, 4.899 s	0.155	903
Naphthalene, 1,4,6-trimethyl-	1.1	155.08	XIC(155.08Â±500ppm)	1068137	528	612	34.6692 min, 3.507 s	0.118	845
2-Naphthalenecarboxaldehyde	1.29	127.05	XIC(127.05Â±500ppm)	884419	325	277	34.7525 min, 4.766 s	0.161	800
Naphthalene, 1,6,7-trimethyl-	0.73	155.09	XIC(155.09Â±500ppm)	336695	122	160	34.8358 min, 3.614 s	0.116	769
Naphthalene, 2-(1-methylethyl)-	1.01	155.08	XIC(155.08Â±500ppm)	305977	145	181	35.1692 min, 3.620 s	0.102	749
Menadione	1	172.05	XIC(172.05Â±500ppm)	336579	129	240	35.1692 min, 4.698 s	0.14	857
1,2-Dimethoxy-4-(2-methoxyethenyl)benzene	1.26	194.09	XIC(194.09Â±500ppm)	611124	279	474	35.4192 min, 3.717 s	0.127	734
Homovanillyl alcohol	1.1	137.06	XIC(137.06Â±500ppm)	9067911	1408	2576	35.9193 min, 4.326 s	0.136	781
4-Nitroguaiacol	1.37	169.04	XIC(169.03Â±500ppm)	711001	149	358	36.336 min, 4.613 s	0.138	789
1H-Phenalene	1.09	165.07	XIC(165.07Â±500ppm)	1713259	360	516	36.9193 min, 4.254 s	0.133	895
1(2H)-Acenaphthylenone	1.1	168.05	XIC(168.05Â±500ppm)	672016	272	447	37.1694 min, 4.504 s	0.13	815
Phenol, 4-ethenyl-2,6-dimethoxy-	1.07	180.08	XIC(180.08Â±500ppm)	822168	272	454	37.2527 min, 4.030 s	0.117	762
Benzene, nonyl-	1.06	92.06	XIC(92.06Â±500ppm)	767363	288	257	37.4194 min, 2.504 s	0.077	884
Fluorene	1.13	166.08	XIC(166.08Â±500ppm)	7593682	1163	2650	37.6694 min, 4.269 s	0.133	929
Naphthalene, 2,3,6-trimethyl-	1.01	155.08	XIC(155.08Â±500ppm)	767988	163	321	37.9194 min, 3.876 s	0.117	851
7-Hexadecene, (Z)-	1.74	55.07	XIC(55.07Â±500ppm)	328893	135	69	38.0861 min, 1.979 s	0.073	879
3,3'-Dimethylbiphenyl	1.25	182.11	XIC(182.11Â±500ppm)	262386	119	115	38.0861 min, 3.555 s	0.106	819
1-Isopropenylnaphthalene	1.07	168.09	XIC(168.09Â±500ppm)	371748	163	258	38.3361 min, 4.142 s	0.137	741
9H-Fluorene, 9-methyl-	1.07	165.07	XIC(165.07Â±500ppm)	1021374	236	393	38.5028 min, 4.042 s	0.125	867
Phenol, 2,6-dimethoxy-4-(2-propenyl)-	1.11	194.09	XIC(194.09Â±500ppm)	5227445	1183	1824	38.7528 min, 3.793 s	0.123	916
Homosyringaldehyde	1.64	44.01	XIC(44.01Â±500ppm)	4776773	142	69	39.0028 min, 3.571 s	0.049	755
Dibenzofuran, 4-methyl-	1.06	182.07	XIC(182.07Â±500ppm)	2605119	500	1307	39.1695 min, 3.976 s	0.123	877
9H-Xanthene	1.09	182.07	XIC(182.07Â±500ppm)	3542733	787	1798	39.5862 min, 3.991 s	0.128	834
Benzaldehyde, 4-hydroxy-3,5-dimethoxy-	1.08	182.06	XIC(182.06Â±500ppm)	3272112	1209	1064	40.8363 min, 4.791 s	0.151	889
Benzene, decyl-	1.14	92.06	XIC(92.06Â±500ppm)	343805	138	116	41.253 min, 2.482 s	0.073	842
2-Methylhexadec-1-ene	1.06	56.08	XIC(56.08Â±500ppm)	2321426	342	391	41.7531 min, 1.962 s	0.061	908
9H-Fluoren-9-one	1.43	180.06	XIC(180.05Â±500ppm)	1158348	267	509	43.2532 min, 4.899 s	0.152	919
2-Hexadecene, 3,7,11,15-tetramethyl-, [R-[R*,R*-(E)]]-	0.98	56.08	XIC(56.08Â±500ppm)	1198023	245	235	43.4199 min, 1.880 s	0.063	861
Naphtho[2,1-b]furan, 1,2-dimethyl-	1.06	196.09	XIC(196.09Â±500ppm)	407137	227	338	43.4199 min, 3.824 s	0.117	773
3,4-Dimethoxy-ÃŸ-nitrostyrene	1.11	91.06	XIC(91.06Â±500ppm)	856382	154	146	44.2533 min, 3.755 s	0.104	717
Drim-7-en-11-ol	1.33	109.1	XIC(109.10Â±500ppm)	201800	117	124	44.5033 min, 3.438 s	0.101	746
Cyclopropane, 1-(1-methylethyl)-2-nonyl-	0.96	56.08	XIC(56.08Â±500ppm)	300382	109	89	44.5866 min, 1.952 s	0.061	826
Phenanthrene	1.16	178.08	XIC(178.08Â±500ppm)	13682918	5068	4198	44.67 min, 4.809 s	0.152	950
Syringylacetone	1.09	167.07	XIC(167.07Â±500ppm)	646305	284	501	44.8366 min, 4.487 s	0.133	855
Anthracene, 1-methyl-	1.25	192.09	XIC(192.09Â±500ppm)	345945	119	273	48.7536 min, 4.565 s	0.135	916
1,2-Benzenedicarboxylic acid, butyl 2-ethylhexyl ester	1.12	149.02	XIC(149.02Â±500ppm)	6932108	3151	2918	49.587 min, 3.305 s	0.111	910
3-methoxy-4-hydroxy-methyl-nitrostyrene	2.59	41.04	XIC(41.04Â±500ppm)	1809612	237	131	49.6704 min, 4.441 s	0.191	860
Dibutyl phthalate	1.16	149.02	XIC(149.02Â±500ppm)	3564336	2083	1931	51.0871 min, 3.351 s	0.109	929
1,2-Benzenedicarboxylic acid, butyl octyl ester	1.16	149.02	XIC(149.02Â±500ppm)	1970529	1067	1473	51.7539 min, 3.200 s	0.107	818

## Sheet: Cocos nucifera (SPE13)
Name	Tailing.Factor	Base.Mass	Quant.Masses	Area	Peak.S.N	Quant.S.N	R.T...min.	FWHH..s.	Similarity
Butanenitrile, 3-methyl-	1.05	43.06	XIC(43.06Â±500ppm)	22754642	1111	528	3.75002 min, 1.968 s	0.127	774
3-Penten-2-one, (E)-	1.29	69.04	XIC(69.04Â±500ppm)	223181333	6514	12315	3.83336 min, 1.964 s	0.112	881
Thiazole	0.17	43.04	XIC(43.04Â±500ppm)	2972470	1025	81	3.83336 min, 2.176 s	0.114	729
Propanoic acid, 2,2-dimethyl-, methyl ester	3.47	41.06	XIC(41.06Â±500ppm)	41367695	358	2012	3.9167 min, 1.506 s	0.08	750
Butane, 2-ethoxy-	0.65	45.05	XIC(45.05Â±500ppm)	140635277	1325	3071	3.9167 min, 1.530 s	0.119	740
1-Methylcyclohexa-1,3-diene	1.23	79.06	XIC(79.06Â±500ppm)	24255832	3024	2867	3.9167 min, 1.646 s	0.091	877
Pyridine	2.82	79.04	XIC(79.03Â±500ppm)	328397418	4895	9255	4.00004 min, 2.121 s	0.157	933
Furan, 2-methyl-	1.82	53.06	XIC(53.06Â±500ppm)	25218724	3692	2697	4.08338 min, 2.086 s	0.098	822
2,2'-Bioxirane	1.27	55.03	XIC(55.03Â±500ppm)	43884455	3127	3949	4.08338 min, 2.176 s	0.105	764
2-Pentenal, (E)-	2.76	55.07	XIC(55.07Â±500ppm)	16204488	882	2233	4.16672 min, 2.008 s	0.093	814
2-Pentanone, 3-methylene-	0.53	43.04	XIC(43.04Â±500ppm)	12581989	480	296	4.3334 min, 1.902 s	0.115	776
2-Butenoic acid, methyl ester	1.34	69.04	XIC(69.04Â±500ppm)	13030017	1805	2452	4.3334 min, 1.940 s	0.102	813
N-tert-Butylethylamine	1.17	86.04	XIC(86.04Â±500ppm)	65062901	5643	15041	4.3334 min, 2.410 s	0.127	822
1-Hydroxy-2-butanone	1.63	57.05	XIC(57.05Â±500ppm)	215432440	5205	5774	4.41674 min, 2.199 s	0.13	925
Heptane, 3-methyl-	0.77	43.07	XIC(43.07Â±500ppm)	38734868	891	1285	4.41674 min, 6.485 s	0.089	911
4-Hexen-3-one	0.88	41.06	XIC(41.06Â±500ppm)	10653200	1006	533	4.50008 min, 1.899 s	0.107	833
Diethylcyanamide	1.42	55.04	XIC(55.04Â±500ppm)	15597315	678	1101	4.58342 min, 1.959 s	0.11	782
Butanenitrile, 2-methylene-	1.33	41.05	XIC(41.05Â±500ppm)	9239247	440	317	4.58342 min, 2.216 s	0.111	833
2(5H)-Furanone	1.22	55.04	XIC(55.04Â±500ppm)	9880236	2640	537	4.58342 min, 2.565 s	0.119	810
2-Furanol, tetrahydro-	1.4	42.06	XIC(42.06Â±500ppm)	115335827	2015	1718	4.7501 min, 2.157 s	0.133	822
Butanoic acid	1.13	60.04	XIC(60.04Â±500ppm)	198573100	4441	5571	4.83344 min, 1.808 s	0.103	852
3-Hexanone	2.11	43.07	XIC(43.07Â±500ppm)	56483452	1406	1795	4.83344 min, 1.926 s	0.101	926
Furan, 2,3-dihydro-4-methyl-	1.01	84.06	XIC(84.06Â±500ppm)	17928201	1158	2855	4.83344 min, 2.232 s	0.111	819
Crotonic acid	0.96	86.04	XIC(86.04Â±500ppm)	10977027	973	1733	5.00012 min, 1.901 s	0.103	745
1,4-Cyclohexadiene, 1,2-dimethyl-	1.18	93.07	XIC(93.07Â±500ppm)	1982810	582	731	5.25014 min, 1.778 s	0.128	865
3(2H)-Furanone, dihydro-2-methyl-	0.34	43.04	XIC(43.04Â±500ppm)	24050638	661	656	5.33348 min, 2.502 s	0.151	840
4-Penten-2-one, 3-methyl-	2.89	43.03	XIC(43.03Â±500ppm)	35662816	1612	1141	5.41682 min, 2.189 s	0.178	784
Thiazole, 2-methyl-	1.84	58	XIC(58.00Â±500ppm)	10363813	1593	1474	5.41682 min, 2.454 s	0.145	831
2-Butenoic acid, 2-methyl-, methyl ester, (Z)-	3.29	55.07	XIC(55.07Â±500ppm)	3146896	372	309	5.50016 min, 2.038 s	0.145	753
1H-Pyrazole, 1,3,5-trimethyl-	1.34	110.07	XIC(110.07Â±500ppm)	801458	515	437	5.5835 min, 1.913 s	0.12	748
Propanedioic acid, oxo-, bis(1-methylethyl) ester	0.24	43.04	XIC(43.04Â±500ppm)	11868802	200	300	5.5835 min, 2.448 s	0.124	750
Furan, 2,5-dihydro-3,4-dimethyl-	1.34	43.04	XIC(43.04Â±500ppm)	4900305	179	201	5.66684 min, 2.182 s	0.097	747
Pyridine, 2-methyl-	2.78	93.06	XIC(93.06Â±500ppm)	226167623	7168	8131	5.66684 min, 2.368 s	0.163	897
Pyrazine, methyl-	1.17	94.05	XIC(94.05Â±500ppm)	33652878	921	3201	5.66684 min, 2.476 s	0.139	772
Pentane, 2-nitro-	0.66	43.07	XIC(43.07Â±500ppm)	21786165	320	629	5.75018 min, 2.316 s	0.151	828
Methyl valerate	1.83	74.04	XIC(74.04Â±500ppm)	3239822	614	532	5.91686 min, 1.986 s	0.111	846
6-Oxa-bicyclo[3.1.0]hexan-3-one	0.2	42.05	XIC(42.05Â±500ppm)	5208677	656	139	5.91686 min, 2.561 s	0.132	706
2-Furanmethanol, tetrahydro-	1.81	71.06	XIC(71.06Â±500ppm)	79476869	2596	5730	6.0002 min, 2.627 s	0.149	895
Dibutyltin maleate	3.07	54.03	XIC(54.03Â±500ppm)	114292462	6056	11718	6.0002 min, 2.767 s	0.157	702
1-Methyltricyclo[2.2.1.0(2,6)]heptane	1.2	93.07	XIC(93.07Â±500ppm)	2240811	479	456	6.16688 min, 1.903 s	0.124	804
1,1-Di(isobutyl)acetone	0.92	43.07	XIC(43.07Â±500ppm)	8321323	603	360	6.25022 min, 2.015 s	0.141	793
Neopentane	1.26	57.09	XIC(57.09Â±500ppm)	29819633	2476	4021	6.25022 min, 2.453 s	0.156	736
Furan, 2-ethyl-	1.22	81.04	XIC(81.04Â±500ppm)	16186110	808	2255	6.25022 min, 2.473 s	0.131	756
Furan, 2-methoxy-	1.81	83.05	XIC(83.05Â±500ppm)	51374370	893	4707	6.33356 min, 2.370 s	0.612	898
Isoamyl cyanide	0.69	55.07	XIC(55.07Â±500ppm)	167442856	510	8689	6.33356 min, 2.491 s	0.148	709
1,3-Cyclopentanedione	0.85	42.06	XIC(42.06Â±500ppm)	56947298	790	1525	6.33356 min, 2.518 s	0.149	755
(R)-(+)-3-Methylcyclopentanone	1.19	69.05	XIC(69.05Â±500ppm)	40438247	1814	4233	6.50024 min, 2.595 s	0.151	869
3-Pentenoic acid, methyl ester	2.4	55.07	XIC(55.07Â±500ppm)	4672970	440	542	6.58358 min, 2.224 s	0.149	768
Pyrrole	0.27	41.04	XIC(41.04Â±500ppm)	1800499	101	100	6.58358 min, 2.808 s	0.139	737
Butanoic acid, 2-methyl-	1.33	74.04	XIC(74.04Â±500ppm)	15180366	1218	2070	6.66692 min, 1.945 s	0.121	910
1,2-Ethanediol, monoacetate	1.3	43.03	XIC(43.03Â±500ppm)	38200229	2768	1409	6.66692 min, 2.698 s	0.139	971
2-Hexenal, (E)-	1.47	41.06	XIC(41.06Â±500ppm)	2629896	104	195	6.75026 min, 2.371 s	0.102	758
2-Furanmethanol	1.57	98.03	XIC(98.03Â±500ppm)	383864608	12472	11759	6.8336 min, 2.692 s	0.194	918
2-Hexanone, 5-methyl-	1.42	43.04	XIC(43.04Â±500ppm)	15744701	893	500	6.91694 min, 2.152 s	0.176	832
3-Ethyl-3-hexene	1.71	55.07	XIC(55.07Â±500ppm)	2985348	324	242	6.91694 min, 2.190 s	0.149	731
2-Butanone	1.19	43.03	XIC(43.03Â±500ppm)	74561747	2439	1153	6.91694 min, 3.275 s	0.165	780
1H-Pyrazole, 3-methyl-	3.49	82.05	XIC(82.05Â±500ppm)	10168386	540	444	6.91694 min, 3.308 s	0.234	714
Furan, 2-(methoxymethyl)-	4.96	53.06	XIC(53.06Â±500ppm)	2071587	274	225	7.08362 min, 2.417 s	0.12	814
Pyridine, 3-methyl-	3.73	93.06	XIC(93.06Â±500ppm)	131957292	1654	4274	7.08362 min, 2.707 s	0.173	895
Propanamide	1.46	44.04	XIC(44.04Â±500ppm)	13607780	138	194	7.16696 min, 3.174 s	0.155	716
2-Butenoic acid, 2-methyl-, methyl ester	1.17	83.05	XIC(83.05Â±500ppm)	4926421	1023	674	7.2503 min, 2.345 s	0.12	793
2-Propanone, 1-(acetyloxy)-	1.69	43.04	XIC(43.04Â±500ppm)	1059189803	23064	9625	7.2503 min, 2.995 s	0.365	963
3-Hexen-2-one, 5-methyl-	0.55	43.04	XIC(43.04Â±500ppm)	26407311	358	489	7.41698 min, 2.307 s	0.142	745
Cyclohexene, 3-methyl-	1.26	81.04	XIC(81.04Â±500ppm)	52252568	2517	2981	7.50032 min, 2.989 s	0.165	827
4-Pentenoic acid	2.67	55.07	XIC(55.07Â±500ppm)	6988966	593	518	7.58366 min, 2.104 s	0.113	899
4-Cyclopentene-1,3-dione	1.13	96.02	XIC(96.02Â±500ppm)	39514599	1403	2805	7.58366 min, 3.957 s	0.188	913
5-Hepten-2-one	0.22	43.04	XIC(43.04Â±500ppm)	6659789	168	256	7.667 min, 2.362 s	0.136	757
Pentanoic acid	1.23	60.04	XIC(60.04Â±500ppm)	17261893	1871	1120	7.75034 min, 2.073 s	0.106	894
2H-Pyran-3(4H)-one, dihydro-	2.87	42.05	XIC(42.05Â±500ppm)	42456155	1580	1510	7.75034 min, 3.207 s	0.153	914
Pentanoic acid, 3-methyl-, methyl ester	1.19	74.04	XIC(74.04Â±500ppm)	5246142	1007	797	7.83368 min, 2.119 s	0.141	840
2,6-Lutidine	2.09	107.08	XIC(107.08Â±500ppm)	43514341	2070	3190	7.91702 min, 2.562 s	0.165	867
3(2H)-Pyridazinone	1.09	96.06	XIC(96.06Â±500ppm)	11564975	260	1450	8.00036 min, 2.978 s	0.224	709
2-Heptanone	0.9	43.04	XIC(43.04Â±500ppm)	27461536	924	647	8.0837 min, 2.272 s	0.114	890
Methylenecyclopropanecarboxylic acid	9.1	98.04	XIC(98.04Â±500ppm)	1273753	227	302	8.0837 min, 2.438 s	0.11	748
3,5-Dimethylpyrazole	1.23	96.02	XIC(96.02Â±500ppm)	19164877	775	1391	8.16704 min, 2.481 s	0.111	765
Cyclopentane, 1-ethyl-2-methyl-	2.36	55.06	XIC(55.06Â±500ppm)	4499415	234	446	8.16704 min, 2.585 s	0.157	745
Thiazole, 2-ethyl-	1.14	58	XIC(58.00Â±500ppm)	2941679	229	618	8.25038 min, 2.816 s	0.139	893
s-Triazole, 3-acetamido-	1.11	84.02	XIC(84.02Â±500ppm)	7270194	1031	1666	8.33372 min, 2.645 s	0.124	726
Di(3-Methylbutyl)amine	1.21	44.05	XIC(44.05Â±500ppm)	27336866	1018	362	8.33372 min, 3.386 s	0.185	715
1-Penten-3-one, 2,4-dimethyl-	1.18	69.05	XIC(69.05Â±500ppm)	8154633	1034	1303	8.41706 min, 2.897 s	0.15	738
2H-Pyran-2-one, 5,6-dihydro-	1.1	68.04	XIC(68.04Â±500ppm)	9099280	1237	1178	8.41706 min, 3.549 s	0.163	827
4,4-Dimethyl-2-cyclopenten-1-one	1.74	67.06	XIC(67.06Â±500ppm)	4748615	199	719	8.5004 min, 2.796 s	0.166	739
Ethanone, 1-(2-furanyl)-	1.42	95.01	XIC(95.01Â±500ppm)	30381573	1095	3571	8.5004 min, 3.071 s	0.149	824
Pyridine, 2-ethyl-	2.54	106.07	XIC(106.07Â±500ppm)	35034589	2407	2715	8.58374 min, 2.704 s	0.17	795
Pyrazine, 2,5-dimethyl-	1.69	108.07	XIC(108.07Â±500ppm)	10453969	455	2257	8.75042 min, 2.873 s	0.21	739
Fumaronitrile	0.17	78.05	XIC(78.05Â±500ppm)	14135081	244	379	8.75042 min, 4.188 s	0.19	720
Butyrolactone	1.28	42.06	XIC(42.06Â±500ppm)	437435375	10939	5545	8.75042 min, 4.539 s	0.231	951
Methyl acetoxyacetate	2.25	43.04	XIC(43.04Â±500ppm)	39435695	701	1106	8.83376 min, 2.991 s	0.154	931
Pyrazine, ethyl-	1.7	107.06	XIC(107.06Â±500ppm)	37151518	1670	3057	8.9171 min, 2.886 s	0.158	935
2,3-Hexanedione	1.99	43.07	XIC(43.07Â±500ppm)	26641774	729	1122	8.9171 min, 3.000 s	0.249	851
1,2-Benzenediol, O-(2-furoyl)-O'-(pentafluoropropionyl)-	1.21	95.02	XIC(95.02Â±500ppm)	11031853	988	803	8.9171 min, 3.154 s	0.165	753
Anisole	1.15	108.06	XIC(108.06Â±500ppm)	25686316	1439	3464	9.00044 min, 2.844 s	0.137	880
1,4-Cyclohex-2-enedione	1.52	54.04	XIC(54.04Â±500ppm)	8265220	499	616	9.00044 min, 3.768 s	0.211	780
3-Hexen-2-one, 3-methyl-	1.65	69.08	XIC(69.08Â±500ppm)	5829489	599	730	9.25046 min, 2.487 s	0.136	839
Cyclopentanone, 3,4-bis(methylene)-	1.29	79.06	XIC(79.06Â±500ppm)	16604960	1879	1444	9.25046 min, 3.027 s	0.166	765
2-Cyclopenten-1-one, 2-hydroxy-	2.93	98.04	XIC(98.04Â±500ppm)	34350797	1724	5146	9.25046 min, 3.372 s	0.143	918
2(3H)-Furanone, dihydro-3-methylene-	1.43	40.05	XIC(40.05Â±500ppm)	52746919	2515	1463	9.3338 min, 3.577 s	0.159	733
3,3-Dimethyl-6-methylenecyclohexene	1.14	107.09	XIC(107.09Â±500ppm)	400121	154	131	9.50048 min, 2.082 s	0.119	785
Pyrazine, ethenyl-	1.54	106.06	XIC(106.06Â±500ppm)	12625482	548	1979	9.50048 min, 3.162 s	0.162	851
2,5-Hexanedione	1.27	43.04	XIC(43.04Â±500ppm)	126955719	4118	3252	9.50048 min, 3.474 s	0.175	915
2-Cyclohexen-1-one	1.27	68.04	XIC(68.04Â±500ppm)	119432329	7422	6895	9.58382 min, 3.547 s	0.181	868
Pyridine, 2-ethenyl-	1.94	105.06	XIC(105.06Â±500ppm)	13275583	1600	1477	9.66716 min, 3.102 s	0.159	925
N-Cyanomethyl-N-methylacetamide	0.73	43.04	XIC(43.04Â±500ppm)	7319093	289	241	9.7505 min, 3.340 s	0.286	701
3-Hexene, 2,2-dimethyl-, (E)-	5.25	55.05	XIC(55.05Â±500ppm)	4752504	610	584	9.83384 min, 2.589 s	0.123	829
Pyridine, 2,4-dimethyl-	3.3	107.08	XIC(107.08Â±500ppm)	66455759	2763	2441	9.83384 min, 2.776 s	0.163	905
2-Cyclopenten-1-one, 3,4-dimethyl-	1.21	67.07	XIC(67.07Â±500ppm)	67068262	1866	3757	9.83384 min, 2.978 s	0.167	850
N-Methylmaleimide	1.23	54.03	XIC(54.03Â±500ppm)	2666640	356	381	9.83384 min, 3.896 s	0.174	934
2(5H)-Furanone, 5-methyl-	1.24	55.04	XIC(55.04Â±500ppm)	162846198	5128	6040	9.91718 min, 4.163 s	0.19	885
Cyclohexanone, 3-methyl-	3.31	69.05	XIC(69.05Â±500ppm)	3519119	333	608	10.3339 min, 3.056 s	0.201	804
3(2H)-Furanone, 2-(1-hydroxy-1-methyl-2-oxopropyl)-2,5-dimethyl-	1.5	40.05	XIC(40.05Â±500ppm)	31760540	1948	1054	10.3339 min, 3.304 s	0.197	710
2(3H)-Furanone, dihydro-3-methyl-	1.18	41.06	XIC(41.06Â±500ppm)	9780275	801	386	10.3339 min, 4.129 s	0.208	870
Furan, 2-ethyl-5-methyl-	1.51	67.07	XIC(67.07Â±500ppm)	4684695	350	683	10.4172 min, 2.824 s	0.179	821
Pyridine, 2,5-dimethyl-	3.06	107.08	XIC(107.08Â±500ppm)	16114213	1436	1470	10.4172 min, 2.909 s	0.224	907
3,4,5,6-Tetrahydrophthalic anhydride	1.7	79.06	XIC(79.06Â±500ppm)	45773411	1355	2659	10.5006 min, 3.136 s	0.155	831
Ethanone, 1-cyclobutyl-	1.04	55.04	XIC(55.04Â±500ppm)	14638419	1016	1043	10.5006 min, 3.385 s	0.148	739
2(3H)-Furanone, dihydro-5-methyl-	1.3	56.06	XIC(56.06Â±500ppm)	76305758	3827	3518	10.5006 min, 4.186 s	0.188	945
Pyridine, 2-(1-methylethyl)-	2.85	106.07	XIC(106.07Â±500ppm)	5502327	278	657	10.5839 min, 2.693 s	0.182	840
3-Ethylcyclopentanone	10.17	55.06	XIC(55.06Â±500ppm)	4533905	476	425	10.5839 min, 2.981 s	0.152	763
2-n-Butyl furan	1.98	43.04	XIC(43.04Â±500ppm)	13269308	723	528	10.5839 min, 3.178 s	0.183	757
2-Methylidenecyclohexan-1-one	0.88	67.07	XIC(67.07Â±500ppm)	3845860	332	560	10.6672 min, 2.884 s	0.131	751
4(1H)-Pyrimidinone, 1-methyl-	1.02	110.04	XIC(110.04Â±500ppm)	28642937	2692	4685	10.7506 min, 3.545 s	0.196	740
3-Pentenoic acid, 4-methyl-, methyl ester	2.91	69.05	XIC(69.05Â±500ppm)	4272049	322	631	10.8339 min, 3.234 s	0.158	741
1-Methylimidazole-4-carboxaldehyde	1.26	110.04	XIC(110.04Â±500ppm)	4963653	520	1054	10.8339 min, 3.528 s	0.191	706
3-Hexene-2,5-dione	1.15	43.04	XIC(43.04Â±500ppm)	17474116	1215	622	10.8339 min, 3.621 s	0.164	727
Pyridine, 3-ethyl-	3.14	92.05	XIC(92.05Â±500ppm)	5732489	543	576	11.0006 min, 2.982 s	0.173	925
2,3-Pentanedione	1.08	57.05	XIC(57.05Â±500ppm)	168820073	5199	21512	11.0006 min, 3.242 s	0.156	831
2-Butanone, 1-(acetyloxy)-	1.26	43.04	XIC(43.04Â±500ppm)	198786504	9397	4176	11.1673 min, 3.235 s	0.157	933
2-Cyclopenten-1-one, 2,3,4-trimethyl-	7.08	81.08	XIC(81.08Â±500ppm)	2242490	497	279	11.2506 min, 2.763 s	0.189	805
2H-Pyran-2-one	1.38	68.04	XIC(68.04Â±500ppm)	90752067	6508	5043	11.2506 min, 4.520 s	0.185	836
Pyridine, 2-ethyl-6-methyl-	2.23	120.09	XIC(120.09Â±500ppm)	16716376	1475	1905	11.334 min, 2.678 s	0.159	873
2-Acetyl-5-methylfuran	2.39	109.03	XIC(109.03Â±500ppm)	26709183	1710	4985	11.334 min, 3.132 s	0.16	795
4-Octanone	2.48	41.06	XIC(41.06Â±500ppm)	1816150	263	141	11.4173 min, 2.326 s	0.202	732
2,4,6-Cycloheptatrien-1-one	1.23	106.04	XIC(106.04Â±500ppm)	2658409	245	453	11.4173 min, 3.635 s	0.169	790
Phenol, 2-methoxy-	1.49	109.03	XIC(109.03Â±500ppm)	14109558	1226	2974	11.5006 min, 3.050 s	0.154	837
Methyl 2-furoate	1.18	95.01	XIC(95.01Â±500ppm)	100038305	6290	10389	11.5006 min, 3.397 s	0.152	905
4(1H)-Pyrimidinone, 2-methyl-	1.14	110.04	XIC(110.04Â±500ppm)	183600362	3180	7617	11.584 min, 4.199 s	0.166	737
1-Penten-3-one, 2-methyl-	0.8	41.06	XIC(41.06Â±500ppm)	136348203	6909	3479	11.584 min, 4.417 s	0.186	808
Benzene, propoxy-	2.17	94.19	XIC(94.19Â±500ppm)	227724404	1418	19408	11.834 min, 3.111 s	0.157	805
Pyrimidine, 4-butyl-3,4-dihydro-5-methyl-	3.27	95	XIC(95.00Â±500ppm)	117806738	414	7904	11.834 min, 3.112 s	0.441	770
Bromonitromethane	2.22	95.07	XIC(95.07Â±500ppm)	88963939	193	2308	11.834 min, 3.289 s	0.111	717
Allophanic acid, phenyl ester	0.2	94.04	XIC(94.04Â±500ppm)	1083789	120	45	11.834 min, 6.140 s	0.103	800
4H-Pyran-4-one	2.47	96.02	XIC(96.02Â±500ppm)	27976068	2036	1128	11.9173 min, 4.462 s	0.198	948
Phenol, 2-chloro-	1.3	128.01	XIC(128.01Â±500ppm)	2886905	816	970	12.0007 min, 3.100 s	0.142	822
3a-Methyl-cis-hexahydrophthalide	1.6	82.05	XIC(82.05Â±500ppm)	11169340	1037	1326	12.0007 min, 3.350 s	0.188	717
3-Pentenoic acid, 4-methyl-	1.21	43.04	XIC(43.04Â±500ppm)	6303364	473	268	12.0007 min, 3.834 s	0.167	881
2-Hydroxy-gamma-butyrolactone	1.21	57.06	XIC(57.06Â±500ppm)	8384535	3092	1056	12.0007 min, 4.867 s	0.188	763
2,4-Nonadiene, (E,E)-	1.15	81.04	XIC(81.04Â±500ppm)	3839040	517	430	12.084 min, 3.385 s	0.174	709
Pentanoic acid, 4-oxo-, methyl ester	1.19	43.04	XIC(43.04Â±500ppm)	74841992	1585	1683	12.084 min, 3.502 s	0.147	917
Benzene, 1-ethenyl-3-methyl-	1.14	118.08	XIC(118.08Â±500ppm)	29823976	4409	5671	12.2507 min, 2.758 s	0.134	928
Trifluoroacetamidine	0.99	43.04	XIC(43.04Â±500ppm)	19182664	579	770	12.2507 min, 3.529 s	0.146	750
Benzofuran	1.09	118.04	XIC(118.04Â±500ppm)	120309449	2180	25671	12.334 min, 3.217 s	0.143	945
2-Furanmethanol, acetate	3.56	81.04	XIC(81.04Â±500ppm)	5821294	408	841	12.4174 min, 3.156 s	0.137	866
2-Thiophenecarboxaldehyde	0.95	110.99	XIC(110.99Â±500ppm)	4901948	536	1364	12.5007 min, 4.169 s	0.152	786
1,3-Benzodioxole	1.06	121.03	XIC(121.03Â±500ppm)	8158530	765	2546	12.5841 min, 3.346 s	0.141	894
Pyridine, 3-methoxy-	3.03	109.06	XIC(109.06Â±500ppm)	34496660	1373	1484	12.5841 min, 3.622 s	0.174	873
2-Furanone, 2,5-dihydro-3,5-dimethyl	1.32	69.04	XIC(69.04Â±500ppm)	122510549	6179	5501	12.5841 min, 3.942 s	0.186	887
1H-Pyrrole-2-carboxaldehyde, 1-methyl-	1.34	109.06	XIC(109.06Â±500ppm)	8645328	1331	836	12.7507 min, 3.819 s	0.17	877
3-Pyridinecarbonitrile	1.9	104.04	XIC(104.04Â±500ppm)	7359355	1122	1264	12.8341 min, 4.179 s	0.169	945
1-Propanone, 1-(2-furanyl)-	1.38	95.01	XIC(95.01Â±500ppm)	50436237	3816	4421	12.9174 min, 3.364 s	0.147	901
Propanoic acid, 2-methyl-, anhydride	1.38	71.06	XIC(71.06Â±500ppm)	129177084	1958	5965	12.9174 min, 3.463 s	0.181	825
1H-Pyrrole-2-carboxaldehyde	1.15	95.04	XIC(95.04Â±500ppm)	20492528	1247	1197	12.9174 min, 3.920 s	0.152	923
2-Butene-1,4-diol, (Z)-	0.2	42.06	XIC(42.06Â±500ppm)	1965026	139	85	12.9174 min, 4.132 s	0.158	739
Benzene, 1-methoxy-4-methyl-	1.16	122.08	XIC(122.08Â±500ppm)	13561678	3479	2801	13.0008 min, 2.952 s	0.146	867
Benzene, 1,3-dichloro-	1.11	145.97	XIC(145.97Â±500ppm)	13575100	2856	12721	13.0008 min, 3.021 s	0.124	921
Norephedrine, (Â±)-	1.31	44	XIC(44.00Â±500ppm)	3114038	101	81	13.0008 min, 3.671 s	0.05	703
p-Benzoquinone, 2-methyl-	0.99	54.03	XIC(54.03Â±500ppm)	3023382	975	414	13.0841 min, 3.987 s	0.158	837
2-Cyclohexen-1-one, 4,4-dimethyl-	1.14	68.04	XIC(68.04Â±500ppm)	24412949	3320	1625	13.1674 min, 3.837 s	0.174	755
2-Propanamine	0.22	44.01	XIC(44.01Â±500ppm)	3778178	110	85	13.1674 min, 6.138 s	0.102	715
Pyrazole, 1,4-dimethyl-	1.27	96.02	XIC(96.02Â±500ppm)	2808378	340	363	13.2508 min, 1.897 s	0.076	781
5,6,7,8-Tetrahydroindolizine	5.91	120.09	XIC(120.09Â±500ppm)	12162146	1038	1823	13.2508 min, 2.948 s	0.168	808
Benzoxazole	0.88	119.04	XIC(119.04Â±500ppm)	8180615	758	1292	13.3341 min, 3.595 s	0.172	936
4(3H)-Pyrimidinone, 3-methyl-	1.14	110.04	XIC(110.04Â±500ppm)	43258746	1613	3997	13.3341 min, 4.081 s	0.165	725
Benzene, 2-propenyl-	1.09	117.07	XIC(117.07Â±500ppm)	11378064	2030	3172	13.6675 min, 2.884 s	0.122	938
2-Cyclopenten-1-one, 3,4,5-trimethyl-	1.31	81.08	XIC(81.08Â±500ppm)	7766408	1177	956	13.6675 min, 3.066 s	0.153	825
1,2-Cyclopentanedione, 3-methyl-	1.15	112.05	XIC(112.05Â±500ppm)	80276044	2248	5163	13.6675 min, 3.600 s	0.153	877
Heptanoic acid, methyl ester	1.2	74.04	XIC(74.04Â±500ppm)	1124727	231	193	13.7508 min, 2.364 s	0.111	803
Propanoic acid, 3-hydroxy-	1.39	45.02	XIC(45.02Â±500ppm)	3972651	852	229	13.7508 min, 2.898 s	0.108	747
2,5-pyrrolidinedione, 3-octadecyl-	0.45	43.04	XIC(43.04Â±500ppm)	11672009	519	519	13.7508 min, 3.568 s	0.139	704
1,4-Cyclohexanedione	1.59	56.05	XIC(56.05Â±500ppm)	6265895	572	789	13.8342 min, 3.949 s	0.237	801
Benzene, 1-ethyl-4-methoxy-	0.89	121.04	XIC(121.04Â±500ppm)	13035121	740	2624	13.9175 min, 3.192 s	0.137	781
2,5-Furandicarboxaldehyde	0.44	124.06	XIC(124.06Â±500ppm)	4132788	367	1354	13.9175 min, 3.377 s	0.135	769
1-Methylcyclooctene	1.29	96.06	XIC(96.06Â±500ppm)	13974157	773	1267	14.0008 min, 3.101 s	0.157	740
Hydroquinone	1.58	110.04	XIC(110.04Â±500ppm)	10856033	1066	1226	14.0008 min, 4.296 s	0.178	814
2-Butylcyclopenanone	1.36	84.06	XIC(84.06Â±500ppm)	2522145	1634	470	14.1675 min, 2.979 s	0.151	803
2-Furancarboxylic acid, 3-methyl-, methyl ester	1.14	109.03	XIC(109.03Â±500ppm)	3039781	407	502	14.1675 min, 3.008 s	0.127	766
2(5H)-Furanone, 5-ethyl-	1.19	83.04	XIC(83.04Â±500ppm)	22590970	448	2454	14.1675 min, 4.289 s	0.17	867
2,5-Furandione, 3,4-dimethyl-	1.09	54.07	XIC(54.07Â±500ppm)	8147363	644	815	14.3342 min, 4.099 s	0.148	829
Pyridine, 2-ethyl-4,6-dimethyl-	2.24	134.1	XIC(134.10Â±500ppm)	920943	198	345	14.4175 min, 2.778 s	0.161	745
2-Cyclopenten-1-one, 3,4,4-trimethyl-	2.95	109.07	XIC(109.07Â±500ppm)	4561141	610	602	14.4175 min, 3.278 s	0.202	708
Benzene, 1-propynyl-	1.09	115.05	XIC(115.05Â±500ppm)	157553567	2365	20335	14.4175 min, 3.309 s	0.15	930
Benzaldehyde, 2-hydroxy-	1.19	122.04	XIC(122.04Â±500ppm)	32080126	1805	3337	14.4175 min, 3.664 s	0.152	923
Benzene, 3-butenyl-	1.16	91.06	XIC(91.06Â±500ppm)	5476034	440	440	14.5009 min, 2.698 s	0.122	806
Orcinol	1.43	123.05	XIC(123.05Â±500ppm)	5089440	743	1311	14.5009 min, 3.499 s	0.156	756
4-Methyl-5H-furan-2-one	1.38	69.04	XIC(69.04Â±500ppm)	66076452	2837	4619	14.5009 min, 5.045 s	0.191	864
2-Methyl-1-octen-3-yne	1.66	79.06	XIC(79.06Â±500ppm)	6546699	765	612	14.5842 min, 3.205 s	0.147	777
Pyridine, 2-(2-methylpropyl)-	5.82	93.06	XIC(93.06Â±500ppm)	3758841	750	633	14.6676 min, 2.824 s	0.169	797
Cyclohexene, 1-methyl-3-(1-methylethyl)-	1.22	95.05	XIC(95.05Â±500ppm)	9627604	1316	1125	14.7509 min, 3.278 s	0.145	719
1H-Indene, octahydro-, trans-	3.87	96.07	XIC(96.07Â±500ppm)	5327787	483	622	14.8342 min, 3.170 s	0.15	793
Cyclohexanone, 3-ethenyl-	0.33	124.06	XIC(124.06Â±500ppm)	3620180	418	1157	14.8342 min, 3.529 s	0.151	754
2-Butenal, 2-methyl-	5.08	55.06	XIC(55.06Â±500ppm)	1726879	533	202	14.9176 min, 4.967 s	0.183	704
2H-Pyran-2-one, tetrahydro-	1.31	42.03	XIC(42.03Â±500ppm)	58442239	3563	1093	14.9176 min, 5.237 s	0.213	884
1,3-Cyclopentanedione, 2,4-dimethyl-	1.04	126.07	XIC(126.07Â±500ppm)	3527684	359	1449	15.0009 min, 3.253 s	0.188	733
2-Cyclohexen-1-one, 3-methyl-	1.43	82.05	XIC(82.05Â±500ppm)	18399433	982	1393	15.0009 min, 3.887 s	0.168	870
Benzene, isocyanato-	2.99	119.04	XIC(119.04Â±500ppm)	5533241	576	775	15.0009 min, 3.999 s	0.181	874
5-Ethyl-2-furaldehyde	1.25	124.06	XIC(124.06Â±500ppm)	3910500	983	1129	15.1676 min, 3.568 s	0.139	783
Pentanoic acid, 4-oxo-	2.67	43.04	XIC(43.04Â±500ppm)	6963571	403	384	15.2509 min, 3.312 s	0.151	807
Ethanone, 1-(1H-pyrrol-2-yl)-	1.26	94.03	XIC(94.03Â±500ppm)	7292143	638	386	15.2509 min, 3.959 s	0.177	879
Benzene, 1,3-diethyl-	0.82	105.07	XIC(105.07Â±500ppm)	1388144	201	220	15.3343 min, 2.670 s	0.131	770
Acetic acid, phenyl ester	1.11	94.04	XIC(94.04Â±500ppm)	216549367	4290	7266	15.3343 min, 3.431 s	0.146	938
3-Hydroxypyridine monoacetate	1.15	95.02	XIC(95.02Â±500ppm)	20664524	1367	2155	15.4176 min, 3.920 s	0.146	726
Bicyclo[3.2.0]hept-3-en-2-one	1.35	79.06	XIC(79.06Â±500ppm)	13793481	842	650	15.4176 min, 4.079 s	0.165	832
2-Pyridinecarbonitrile	1.39	104.04	XIC(104.04Â±500ppm)	11954886	1254	1308	15.4176 min, 4.637 s	0.171	930
Butanoic acid, 3-hydroxy-	1.2	45.05	XIC(45.05Â±500ppm)	1220326	197	92	15.501 min, 2.794 s	0.116	738
Benzaldehyde, 2-methyl-	1.34	91.06	XIC(91.06Â±500ppm)	99020629	16822	3906	15.5843 min, 3.621 s	0.151	908
Benzonitrile, 2-methyl-	1.39	117.06	XIC(117.06Â±500ppm)	40456840	2107	4381	15.5843 min, 3.761 s	0.161	793
Benzene, 2-butenyl-	1.06	117.08	XIC(117.08Â±500ppm)	1251530	335	336	15.6676 min, 2.774 s	0.116	815
4-Pyridazinamine	1.29	95.04	XIC(95.04Â±500ppm)	2574183	398	344	15.751 min, 4.450 s	0.169	737
4,4-Dimethylcyclohexadienone	0.44	79.07	XIC(79.07Â±500ppm)	2537372	155	257	15.8343 min, 3.485 s	0.181	711
2,3-Dimethyl-4-hydroxy-2-butenoic lactone	1.28	55.07	XIC(55.07Â±500ppm)	14359548	1206	891	15.8343 min, 4.352 s	0.169	778
4-Nonanone	1.35	43.08	XIC(43.08Â±500ppm)	2757929	366	158	15.9177 min, 2.431 s	0.119	844
Benzene, (2-methyl-1-propenyl)-	1.1	117.07	XIC(117.07Â±500ppm)	1378456	612	436	15.9177 min, 2.844 s	0.154	766
Nona-3,5-dien-2-one	1.17	43.04	XIC(43.04Â±500ppm)	13557712	623	498	15.9177 min, 3.429 s	0.138	766
2-Cyclopenten-1-one, 3-ethyl-	1.7	81.04	XIC(81.04Â±500ppm)	48444393	5301	3436	15.9177 min, 3.850 s	0.167	836
1-(1H-Imidazol-2-yl)-ethanone	1.87	82.05	XIC(82.05Â±500ppm)	8726906	979	859	15.9177 min, 4.621 s	0.184	713
4-Undecene, 4-methyl-, (Z)-	1.22	69.08	XIC(69.08Â±500ppm)	2053571	403	362	16.0843 min, 1.860 s	0.109	808
Heptanoic acid	1.28	60.04	XIC(60.04Â±500ppm)	3385547	412	386	16.0843 min, 2.367 s	0.099	893
Benzofuran, 2,3-dihydro-	1.05	120.06	XIC(120.06Â±500ppm)	63948997	1859	6378	16.0843 min, 3.773 s	0.144	859
2-Methylindene	1.34	130.08	XIC(130.08Â±500ppm)	8928184	799	2719	16.1677 min, 3.122 s	0.134	870
2-Norcaranone, 3-methyl-	1.19	124.06	XIC(124.06Â±500ppm)	48521797	978	5823	16.251 min, 4.156 s	0.154	716
Naphthalene, 1,2-dihydro-4-methyl-	1.2	129.08	XIC(129.08Â±500ppm)	2032047	314	732	16.3344 min, 2.864 s	0.169	810
1,12-Tridecadiene	0.51	41.06	XIC(41.06Â±500ppm)	1018820	137	73	16.4177 min, 1.992 s	0.089	893
Benzene, 1-ethyl-2,3-dimethyl-	1.11	119.09	XIC(119.09Â±500ppm)	43373592	4117	5772	16.4177 min, 2.691 s	0.127	904
Benzene, 1-ethenyl-4-ethyl-	0.93	117.07	XIC(117.07Â±500ppm)	31879167	1746	4901	16.4177 min, 2.854 s	0.204	840
Furan, 2,2'-methylenebis-	0.41	91.06	XIC(91.06Â±500ppm)	5080551	482	471	16.4177 min, 3.179 s	0.122	867
3-Acetyl-2,5-dimethyl furan	3.43	43.04	XIC(43.04Â±500ppm)	19258401	1030	877	16.4177 min, 3.268 s	0.172	865
6-Hydroxy-2,6-dihydropyran-3-one	1.11	84.03	XIC(84.03Â±500ppm)	2664687	877	619	16.501 min, 4.069 s	0.148	737
1,3-Cyclohexadiene, 1-methyl-4-(1-methylethyl)-	1.08	93.07	XIC(93.07Â±500ppm)	396165	116	89	16.5844 min, 2.439 s	0.11	761
Benzene, 1-methyl-3-(1-methylethenyl)-	1.06	117.08	XIC(117.08Â±500ppm)	5529427	1375	1264	16.5844 min, 2.843 s	0.123	913
Ethanone, 1-(1-methylcyclopentyl)-	0.6	55.07	XIC(55.07Â±500ppm)	13499888	512	1120	16.5844 min, 3.853 s	0.137	733
2,5-Pyrrolidinedione, 1-methyl-	1.48	113.05	XIC(113.05Â±500ppm)	36350799	1983	6044	16.6677 min, 5.409 s	0.206	852
Cyclopropyl carbinol	1.25	44.05	XIC(44.05Â±500ppm)	79629350	2615	824	16.7511 min, 5.166 s	0.194	781
1-Undecene	1.2	55.07	XIC(55.07Â±500ppm)	11479391	1007	639	16.8344 min, 1.899 s	0.082	928
Benzoic acid, methyl ester	1.19	105.04	XIC(105.04Â±500ppm)	95376321	3005	7697	16.8344 min, 3.481 s	0.144	960
1,2,4-Triazin-3-amine, 5,6-dimethyl-	1.1	43.04	XIC(43.04Â±500ppm)	11938479	589	610	16.8344 min, 3.754 s	0.139	714
3(2H)-Pyridazinone, 6-methyl-	1.83	82.05	XIC(82.05Â±500ppm)	5286337	940	522	16.8344 min, 4.747 s	0.187	778
2,4-Dimethylstyrene	1.1	117.08	XIC(117.08Â±500ppm)	10730572	1129	2044	16.9177 min, 2.836 s	0.133	866
Propiolonitrile	0.9	51.05	XIC(51.05Â±500ppm)	15682780	873	1155	16.9177 min, 3.426 s	0.218	746
4-Hepten-3-one, 4-methyl-	1.38	97.04	XIC(97.04Â±500ppm)	19407185	3047	2950	16.9177 min, 3.887 s	0.164	824
Benzofuran, 2-methyl-	1.09	131.05	XIC(131.05Â±500ppm)	68414753	2189	15621	17.0011 min, 3.318 s	0.14	908
4-Undecene, (Z)-	1.39	69.08	XIC(69.08Â±500ppm)	1097310	148	191	17.0844 min, 1.914 s	0.09	873
2-Cyclopenten-1-one, 2-hydroxy-3-methyl-	1.57	112.06	XIC(112.06Â±500ppm)	2748428	434	581	17.0844 min, 4.597 s	0.239	729
Benzene, 2-ethenyl-1,3-dimethyl-	1.04	117.08	XIC(117.08Â±500ppm)	3901158	770	1035	17.1678 min, 2.885 s	0.126	891
2-Ethyl-3-methylcyclopent-2-en-1-one	2.86	81.08	XIC(81.08Â±500ppm)	23311099	1184	1422	17.2511 min, 3.467 s	0.163	764
3-Ethenyl-3-methylcyclopentanone	1.2	68.05	XIC(68.05Â±500ppm)	12345900	1023	1157	17.2511 min, 3.795 s	0.143	768
Benzonitrile, 4-methyl-	1.44	117.06	XIC(117.06Â±500ppm)	15602907	3205	2770	17.2511 min, 3.849 s	0.145	942
Spiro[4.5]decane	1.62	138.07	XIC(138.07Â±500ppm)	2618844	491	1040	17.3344 min, 3.669 s	0.146	751
2,5-Cyclohexadiene-1,4-dione, 2,6-dimethyl-	0.72	68.05	XIC(68.05Â±500ppm)	5150868	626	454	17.3344 min, 3.846 s	0.185	783
3-Undecene, (Z)-	0.91	55.07	XIC(55.07Â±500ppm)	2821707	231	232	17.4178 min, 1.929 s	0.082	909
Phenol, 3,4-dimethyl-	1.11	122.07	XIC(122.07Â±500ppm)	43401603	647	2892	17.4178 min, 3.420 s	0.142	807
2-Cyclopenten-1-one, 3,4,5,5-tetramethyl-	2.64	123.09	XIC(123.09Â±500ppm)	2331514	284	520	17.5011 min, 3.094 s	0.178	737
p-Mentha-1,5,8-triene	0.81	134.08	XIC(134.08Â±500ppm)	3583618	524	1582	17.5011 min, 3.446 s	0.135	713
1H-Imidazole, 1-methyl-4-nitro-	1.49	42.06	XIC(42.06Â±500ppm)	26176861	1081	649	17.5011 min, 4.567 s	0.189	705
2,5-Dimethylanisole	1.81	136.09	XIC(136.09Â±500ppm)	24883181	3328	6188	17.5845 min, 2.964 s	0.149	894
Pentane, 1-propoxy-	1.26	43.04	XIC(43.04Â±500ppm)	36119799	2684	1203	17.5845 min, 4.070 s	0.174	734
Levoglucosenone	1.02	98.04	XIC(98.04Â±500ppm)	6056238	1636	1169	17.7511 min, 4.758 s	0.177	892
2-Undecene, (E)-	1.43	55.07	XIC(55.07Â±500ppm)	979298	166	154	17.8345 min, 1.946 s	0.084	933
2-tert-Butyltoluene	2.17	133.11	XIC(133.11Â±500ppm)	1846198	221	366	17.8345 min, 2.588 s	0.128	775
2-Cyclohexen-1-one, 3,5-dimethyl-	1.12	82.01	XIC(82.01Â±500ppm)	7760370	888	1365	17.8345 min, 3.923 s	0.136	790
1-(2,3-Dimethylphenyl)ethanone	1.1	133.07	XIC(133.07Â±500ppm)	1237627	218	237	17.9178 min, 3.142 s	0.142	749
1H-Indene, 1-methyl-	0.91	130.08	XIC(130.08Â±500ppm)	791927	222	389	17.9178 min, 3.169 s	0.126	783
1,3-Benzodioxol-2-one	1.05	64.05	XIC(64.05Â±500ppm)	12990332	1489	1083	17.9178 min, 3.991 s	0.133	884
3,5-Dimethylanisole	1.16	136.09	XIC(136.09Â±500ppm)	10507627	1507	1788	18.0012 min, 3.075 s	0.138	812
2-Cyclopenten-1-one, 3-ethyl-2-hydroxy-	1.71	55.07	XIC(55.07Â±500ppm)	14004906	2620	831	18.0012 min, 3.516 s	0.135	896
Valeric anhydride	1.21	85.02	XIC(85.02Â±500ppm)	10614183	2228	1740	18.0012 min, 4.806 s	0.165	762
4-Methoxy-o-phenylenediamine	1.47	123.09	XIC(123.09Â±500ppm)	3586974	310	808	18.0845 min, 3.117 s	0.165	749
Ethanone, 1-(2-hydroxy-5-methylphenyl)-	1.04	135.05	XIC(135.05Â±500ppm)	3392517	410	1003	18.1678 min, 3.200 s	0.134	779
2,4(3H,5H)-Furandione, 3-methyl-	1.07	56.05	XIC(56.05Â±500ppm)	12617541	1639	1367	18.1678 min, 6.445 s	0.213	705
1-Phenyl-1-butene	1.15	117.08	XIC(117.08Â±500ppm)	18189378	3649	3107	18.2512 min, 2.930 s	0.149	909
Benzene, 1,3-diethenyl-	0.98	130.08	XIC(130.08Â±500ppm)	3175436	680	1193	18.2512 min, 3.150 s	0.114	906
Cyclopentanone, 2,2,4-trimethyl-	1.1	56.05	XIC(56.05Â±500ppm)	1473685	630	197	18.2512 min, 5.031 s	0.204	745
3-Cyclohexene-1-carboxaldehyde, 4-methyl-	1.12	109.07	XIC(109.07Â±500ppm)	2575949	350	379	18.3345 min, 3.619 s	0.168	760
4H-Pyran-4-one, 3,5-dimethyl-	1.56	124.06	XIC(124.06Â±500ppm)	2073619	324	364	18.3345 min, 4.076 s	0.169	725
1,4-Undecadiene, (E)-	1.18	54.07	XIC(54.07Â±500ppm)	1169807	119	163	18.4179 min, 2.082 s	0.091	762
Benzyl methyl ketone	1.17	43.04	XIC(43.04Â±500ppm)	30879377	4292	877	18.4179 min, 3.829 s	0.16	868
2(3H)-Furanone, 5-acetyldihydro-	1.13	85.03	XIC(85.03Â±500ppm)	24204183	2566	3539	18.4179 min, 5.436 s	0.192	897
Benzene, 2-ethenyl-1,4-dimethyl-	1.05	117.08	XIC(117.08Â±500ppm)	12059964	1554	2246	18.5012 min, 2.915 s	0.115	902
Cyclohexene, 1-butyl-	1.51	96.06	XIC(96.06Â±500ppm)	2205814	335	292	18.5012 min, 3.115 s	0.132	734
1-Propanone, 1-(5-methyl-2-furanyl)-	1.57	109.04	XIC(109.04Â±500ppm)	12758590	975	1680	18.5845 min, 3.502 s	0.182	861
Spiro[2.3]hexan-5-one, 4,4-diethyl-	1.65	124.09	XIC(124.09Â±500ppm)	16022332	1444	1486	18.5845 min, 3.553 s	0.153	752
2,3-Dimethylanisole	3.6	136.09	XIC(136.09Â±500ppm)	2220014	220	806	18.6679 min, 3.184 s	0.214	810
Benzene, 1,3-dimethyl-5-(1-methylethyl)-	1.16	133.11	XIC(133.11Â±500ppm)	2008889	517	572	18.7512 min, 2.630 s	0.131	826
Phenol, 2-methoxy-3-methyl-	1.1	123.05	XIC(123.05Â±500ppm)	1424858	354	534	18.7512 min, 3.477 s	0.15	731
4-Ethylbenzoic acid, 2-formyl-4,6-dichlorophenyl ester	1.06	133.11	XIC(133.11Â±500ppm)	1038784	245	335	18.8346 min, 2.614 s	0.125	835
m-Cresyl acetate	1.14	108.06	XIC(108.06Â±500ppm)	4660514	756	508	18.8346 min, 3.401 s	0.153	875
Ethanone, 1-(2-methylphenyl)-	1.25	119.05	XIC(119.05Â±500ppm)	11494435	3824	1791	18.8346 min, 3.606 s	0.151	891
1-Methylenespiro[2.4]heptan-4-one	0.33	79.06	XIC(79.06Â±500ppm)	3268650	227	375	18.8346 min, 3.852 s	0.14	705
Benzene, (3-chloro-3-methylbutyl)-	0.71	91.06	XIC(91.06Â±500ppm)	1614899	264	160	18.9179 min, 2.753 s	0.119	723
Benzene, 1-ethenyl-3-methoxy-	1.3	134.08	XIC(134.08Â±500ppm)	1518961	240	621	18.9179 min, 3.366 s	0.116	742
Benzyl nitrile	1.33	117.06	XIC(117.06Â±500ppm)	42660157	2640	5231	18.9179 min, 4.447 s	0.164	945
Phenol, 2-ethyl-	1.21	107.05	XIC(107.05Â±500ppm)	113361268	4557	5144	19.0012 min, 3.231 s	0.13	917
Pentanedioic acid, dimethyl ester	0.97	59.05	XIC(59.05Â±500ppm)	1657900	204	489	19.0012 min, 3.295 s	0.128	771
Naphthalene, 1,2,3,4-tetrahydro-1-methyl-	2	131.09	XIC(131.09Â±500ppm)	1861676	291	510	19.0846 min, 2.780 s	0.202	809
Cyclopentane, 1-acetyl-1,2-epoxy-	1.2	55.08	XIC(55.08Â±500ppm)	17237302	2140	1071	19.0846 min, 4.212 s	0.174	806
Benzene, 1,4-diethyl-2-methyl-	1.06	133.11	XIC(133.11Â±500ppm)	7384612	1019	1876	19.1679 min, 2.633 s	0.136	859
o-Ethylbenzonitrile	1.41	116.05	XIC(116.05Â±500ppm)	3446119	574	963	19.2513 min, 3.684 s	0.157	847
1H-Indene, 3-methyl-	1.02	130.08	XIC(130.08Â±500ppm)	123064048	2834	16327	19.3346 min, 3.323 s	0.132	922
Benzene, 1,2-dimethoxy-	1.51	138.07	XIC(138.07Â±500ppm)	20003827	2441	2817	19.4179 min, 3.788 s	0.159	899
1H-Pyrrole-2-carbonitrile	1.21	92.04	XIC(92.04Â±500ppm)	6596681	763	940	19.4179 min, 4.074 s	0.14	931
2-Isobutyl-4-methylpyridine	11.03	107.08	XIC(107.08Â±500ppm)	4718636	463	367	19.5013 min, 2.869 s	0.146	731
Phenol, 2,6-dimethyl-	1.24	107.05	XIC(107.05Â±500ppm)	217402821	3255	5208	19.5013 min, 3.259 s	0.134	916
2H-Pyran-2-carboxaldehyde, 3,4-dihydro-	1.44	83.05	XIC(83.05Â±500ppm)	21932832	4288	2222	19.5013 min, 4.863 s	0.176	821
1,4-Dioxaspiro[2.4]heptan-5-one, 6-methyl-	1.09	42.06	XIC(42.06Â±500ppm)	44707927	1928	1356	19.5013 min, 5.677 s	0.198	727
2,4-Dihydroxybenzaldehyde, 2TMS derivative	0.49	267.02	XIC(267.02Â±500ppm)	1119483	214	768	19.668 min, 1.574 s	0.18	768
2,2-Dimethylindene, 2,3-dihydro-	1.24	131.09	XIC(131.09Â±500ppm)	1257707	337	340	19.668 min, 2.786 s	0.126	855
Benzaldehyde, 2-hydroxy-4-methyl-	1.52	44.01	XIC(44.01Â±500ppm)	3122196	142	78	19.668 min, 3.635 s	0.048	783
Propanoic acid, phenyl ester	1.12	94.04	XIC(94.04Â±500ppm)	17139363	1127	1078	19.8346 min, 3.359 s	0.123	890
Benzaldehyde, 2-hydroxy-6-methyl-	1.16	135.05	XIC(135.05Â±500ppm)	2360057	598	516	19.8346 min, 3.700 s	0.137	817
Naphthalene, 1,2-dihydro-	1.13	128.07	XIC(128.07Â±500ppm)	19767353	1475	2919	20.0013 min, 3.541 s	0.137	884
Benzaldehyde, 4-ethyl-	1.4	134.08	XIC(134.08Â±500ppm)	3300990	971	1187	20.0013 min, 3.573 s	0.136	758
Ethanone, 1-(2-hydroxyphenyl)-	1.19	121.04	XIC(121.04Â±500ppm)	12812026	964	1355	20.0013 min, 3.826 s	0.137	886
Pyrrolo[1,2-a]pyrazine, 1,2,3,4-tetrahydro-	1.24	121.06	XIC(121.06Â±500ppm)	7329720	433	692	20.0013 min, 4.483 s	0.169	717
Cyclohexene, 3-pentyl-	1.15	68.07	XIC(68.07Â±500ppm)	424978	106	101	20.0847 min, 2.155 s	0.093	704
Benzoic acid	1.27	105.04	XIC(105.04Â±500ppm)	7073781	986	937	20.0847 min, 3.247 s	0.117	922
Sucrose	1.14	57.05	XIC(57.05Â±500ppm)	1235177	600	259	20.0847 min, 5.027 s	0.19	712
1-Propanone, 1-phenyl-	1.31	105.04	XIC(105.04Â±500ppm)	23149689	1402	2191	20.168 min, 3.642 s	0.138	906
Spiro[3.4]octan-5-one	1.44	68.05	XIC(68.05Â±500ppm)	3740167	692	506	20.168 min, 4.221 s	0.158	711
Benzofuran, 2,3-dihydro-2-methyl-	1.02	134.08	XIC(134.08Â±500ppm)	2100570	380	753	20.2513 min, 3.650 s	0.133	719
Benzene, 1,3-dimethoxy-	1.13	138.07	XIC(138.07Â±500ppm)	3177099	317	1411	20.2513 min, 3.687 s	0.134	781
Benzeneacetonitrile, a-methyl-	1.39	116.05	XIC(116.05Â±500ppm)	6456109	1098	1352	20.2513 min, 4.112 s	0.16	889
1,4-Benzodioxin, 2,3-dihydro-	1.21	80.04	XIC(80.04Â±500ppm)	1228762	228	230	20.2513 min, 4.185 s	0.14	707
2H-Pyran-2-one, 4,6-dimethyl-	1.76	81.05	XIC(81.05Â±500ppm)	4641490	374	556	20.3347 min, 3.696 s	0.148	736
Ethanone, 1-(4-methylphenyl)-	1.38	119.05	XIC(119.05Â±500ppm)	46160736	3234	4845	20.5014 min, 3.689 s	0.147	884
4-Decanone	1.87	43.07	XIC(43.07Â±500ppm)	1513859	317	115	20.5847 min, 2.443 s	0.105	736
Benzaldehyde, 2,5-dimethyl-	1.18	133.07	XIC(133.07Â±500ppm)	6158592	892	1209	20.5847 min, 3.593 s	0.143	866
Karahanaenone	0.63	152.09	XIC(152.09Â±500ppm)	3388161	164	825	20.668 min, 3.457 s	0.135	763
2-Cyclohexen-1-one, 4,5-dimethyl-	1.34	82.01	XIC(82.01Â±500ppm)	2384179	853	637	20.668 min, 4.339 s	0.158	784
O-Methoxy-a-methylbenzyl alcohol	4	43.04	XIC(43.04Â±500ppm)	2780858	331	165	20.7514 min, 3.185 s	0.13	724
Creosol	1.2	123.05	XIC(123.05Â±500ppm)	21713780	1674	3048	20.7514 min, 3.485 s	0.133	826
Cyclohexanone, 2-ethyl-2-propyl-	0.3	41.06	XIC(41.06Â±500ppm)	1589949	173	101	20.7514 min, 4.327 s	0.149	707
Phenol, 2,3-dimethyl-	1.21	107.05	XIC(107.05Â±500ppm)	37165841	3267	2381	20.8347 min, 3.423 s	0.137	880
Ethyl-2-benzofuran	1.07	131.06	XIC(131.06Â±500ppm)	19714999	2392	5789	20.9181 min, 3.313 s	0.128	880
2-Ethyl-4-methylanisole	1.07	135.09	XIC(135.09Â±500ppm)	2315178	311	349	21.0014 min, 2.929 s	0.124	731
Furan, 2-(2-furanylmethyl)-5-methyl-	1.05	162.08	XIC(162.08Â±500ppm)	1856700	894	1739	21.0014 min, 3.187 s	0.116	928
Phenol, 2-ethyl-5-methyl-	1.19	121.07	XIC(121.07Â±500ppm)	19500980	990	2002	21.0014 min, 3.386 s	0.129	871
1H-Inden-5-ol, 2,3-dihydro-	2.56	134.08	XIC(134.08Â±500ppm)	16265672	576	2773	21.0014 min, 3.696 s	0.145	725
Cyclohexane, bromo-	1	83.05	XIC(83.05Â±500ppm)	4905097	382	744	21.0014 min, 4.400 s	0.152	734
1,11-Dodecadiene	0.92	55.07	XIC(55.07Â±500ppm)	1477082	241	199	21.0847 min, 2.030 s	0.085	895
2-Acetoxyindane	1.46	116.05	XIC(116.05Â±500ppm)	7450071	517	1364	21.0847 min, 3.708 s	0.22	710
1,2-Naphthalenedione	1.09	102.05	XIC(102.05Â±500ppm)	6689883	595	1160	21.0847 min, 4.289 s	0.145	900
1H-Indene, 2,3-dihydro-1,3-dimethyl-	1.04	131.09	XIC(131.09Â±500ppm)	15666583	1191	2218	21.1681 min, 2.935 s	0.123	893
2-Methoxy-5-methylphenol	1.16	123.05	XIC(123.05Â±500ppm)	12326490	918	1750	21.1681 min, 3.506 s	0.127	888
3-Buten-2-one, 4-(2-furanyl)-	1.31	121.04	XIC(121.04Â±500ppm)	2420455	305	449	21.1681 min, 3.810 s	0.129	851
2-Propenal, 3-(4-methylphenyl)-	1.18	131.06	XIC(131.06Â±500ppm)	4835886	339	886	21.2514 min, 3.945 s	0.156	782
Benzo[c]thiophene	1.07	134.02	XIC(134.02Â±500ppm)	22429404	1885	6818	21.2514 min, 4.108 s	0.141	934
Benzaldehyde, 4-(1-phenyl-2-propenyloxy)-	0.83	117.08	XIC(117.08Â±500ppm)	2395873	421	742	21.4181 min, 2.965 s	0.134	713
2H-1-Benzopyran, 3,4-dihydro-	0.34	134.08	XIC(134.08Â±500ppm)	3750703	324	1382	21.4181 min, 3.771 s	0.133	710
1-Octanol	1.08	55.06	XIC(55.06Â±500ppm)	6141598	1165	330	21.4181 min, 5.437 s	0.22	726
1H-Indene, 2,3-dihydro-4,7-dimethyl-	1.09	131.09	XIC(131.09Â±500ppm)	680408	174	180	21.5014 min, 2.885 s	0.116	824
Phosphonic acid, (p-hydroxyphenyl)-	1.27	94.04	XIC(94.04Â±500ppm)	2537916	240	244	21.5848 min, 1.786 s	0.073	865
Benzene, 1-methoxy-4-(1-methylethyl)-	1.08	135.09	XIC(135.09Â±500ppm)	3137843	307	332	21.5848 min, 2.923 s	0.119	830
1H-Indene, 2,3-dihydro-1,2-dimethyl-	0.98	131.09	XIC(131.09Â±500ppm)	6934256	750	1236	21.5848 min, 3.013 s	0.126	839
2,5-Dimethylbenzoxazole	1.96	147.08	XIC(147.08Â±500ppm)	1336461	295	467	21.5848 min, 3.600 s	0.153	741
Benzene, 1-ethyl-2,4,5-trimethyl-	1.05	133.11	XIC(133.11Â±500ppm)	8023488	988	1544	21.6681 min, 2.765 s	0.119	851
Cinnamaldehyde, (E)-	0.18	131.06	XIC(131.06Â±500ppm)	1792421	303	452	21.6681 min, 3.961 s	0.13	877
Benzaldehyde, 3-methoxy-	1.26	136.06	XIC(136.06Â±500ppm)	1466138	345	242	21.6681 min, 4.122 s	0.155	797
6-Dodecene, (Z)-	0.88	55.07	XIC(55.07Â±500ppm)	2113575	200	197	21.7515 min, 1.944 s	0.093	822
Thymol	1.13	135.09	XIC(135.09Â±500ppm)	2617473	523	403	21.7515 min, 2.995 s	0.117	707
2-Propenenitrile, 3-phenyl-, (E)-	1.33	129.06	XIC(129.06Â±500ppm)	2041768	588	491	21.7515 min, 3.925 s	0.141	859
5H-Benzocycloheptene,6,7,8,9-tetrahydro-	0.24	131.06	XIC(131.06Â±500ppm)	2630098	120	449	21.7515 min, 3.972 s	0.155	733
Benzofuran, 4,7-dimethyl-	1.07	146.08	XIC(146.08Â±500ppm)	31731532	3629	10952	21.8348 min, 3.304 s	0.13	847
Phenol, 2,4,6-trimethyl-	1.15	121.07	XIC(121.07Â±500ppm)	16000643	930	1720	21.9181 min, 3.370 s	0.125	872
Catechol	1.07	110.04	XIC(110.04Â±500ppm)	52424050	2726	5152	21.9181 min, 3.533 s	0.12	879
2,6-Dimethylbenzaldehyde	1.25	134.08	XIC(134.08Â±500ppm)	1427891	205	416	21.9181 min, 3.838 s	0.143	845
Benzoic acid, 3-methyl-, methyl ester	1.12	119.05	XIC(119.05Â±500ppm)	6589115	698	1240	22.0015 min, 3.450 s	0.124	891
Ethanone, 1-(1-ethyl-1H-pyrazol-4-yl)-	0.25	43.04	XIC(43.04Â±500ppm)	1962674	118	106	22.0015 min, 4.697 s	0.191	701
3(2H)-Benzofuranone	1.3	76.04	XIC(76.04Â±500ppm)	1762661	534	308	22.0848 min, 4.511 s	0.174	744
2-Propenal, 3-(2-furanyl)-	1.35	122.04	XIC(122.04Â±500ppm)	3579595	783	562	22.3348 min, 5.076 s	0.181	787
Benzaldehyde, 2,4-dimethyl-	1.25	133.07	XIC(133.07Â±500ppm)	3461781	1254	935	22.4182 min, 3.794 s	0.138	891
3-Dodecene, (E)-	0.33	55.08	XIC(55.08Â±500ppm)	1074660	191	198	22.5015 min, 1.976 s	0.077	924
1-Naphthalenol	0.99	144.06	XIC(144.06Â±500ppm)	1290376	364	583	22.5015 min, 3.554 s	0.122	828
1,4-Cyclohexadiene-1,2-dicarboxylic anhydride	1.25	78.06	XIC(78.06Â±500ppm)	2727774	236	172	22.5015 min, 3.828 s	0.125	742
Benzene, 1-ethyl-4-(1-methylethyl)-	1.06	133.11	XIC(133.11Â±500ppm)	1473468	403	437	22.5849 min, 2.894 s	0.123	770
Tricyclo[4.2.1.1(2,5)]deca-3,7-diene-9,10-dione, (1a,2ÃŸ,5ÃŸ,6a)-	1.15	131.05	XIC(131.05Â±500ppm)	56570968	9454	4587	22.5849 min, 4.594 s	0.179	872
3,4-Anhydro-d-galactosan	0.63	43.04	XIC(43.04Â±500ppm)	2519578	644	131	22.5849 min, 4.983 s	0.178	796
1H-Indazole, 5,7-dimethyl-	1.05	131.05	XIC(131.05Â±500ppm)	63605920	3634	7358	22.6682 min, 3.382 s	0.128	820
Bicyclo[4.1.0]heptane, 3,7,7-trimethyl-	2.43	67.07	XIC(67.07Â±500ppm)	1220389	354	187	22.7515 min, 3.401 s	0.168	768
Furan, 3-phenyl-	0.95	115.06	XIC(115.06Â±500ppm)	1954185	682	402	22.7515 min, 3.643 s	0.125	804
trans-1-Phenyl-1-pentene	1.09	117.08	XIC(117.08Â±500ppm)	3291554	649	678	22.8349 min, 2.866 s	0.101	901
Formic acid, 2-propylphenyl ester	1.21	107.05	XIC(107.05Â±500ppm)	10100359	1147	896	22.8349 min, 3.182 s	0.115	809
Indan, epoxide	1.25	104.07	XIC(104.07Â±500ppm)	5534363	1247	836	22.8349 min, 4.282 s	0.15	927
Benzofuran, 2-ethenyl-	1.66	144.06	XIC(144.06Â±500ppm)	18992869	1508	5406	22.9182 min, 3.520 s	0.123	917
Oxepine, 2,7-dimethyl-	1.2	43.04	XIC(43.04Â±500ppm)	3640223	134	205	22.9182 min, 4.147 s	0.217	704
2,3-Anhydro-d-mannosan	1.08	71.03	XIC(71.03Â±500ppm)	5551139	471	1193	22.9182 min, 4.853 s	0.157	808
Cyclododecene, (E)-	1.04	54.07	XIC(54.07Â±500ppm)	975731	263	211	23.0016 min, 2.102 s	0.074	811
1H-Benzimidazole, 5,6-dimethyl-	1	131.06	XIC(131.06Â±500ppm)	7680516	1059	1531	23.0016 min, 3.425 s	0.123	819
4-Methylphenyl acetone	0.96	105.08	XIC(105.08Â±500ppm)	2776641	328	498	23.0016 min, 3.797 s	0.14	728
Valeric acid, 2-tetrahydrofurylmethyl ester	1.4	71.06	XIC(71.06Â±500ppm)	12924520	1722	1772	23.0849 min, 4.001 s	0.159	746
Phenol, 2-ethyl-4-methyl-	1.17	121.07	XIC(121.07Â±500ppm)	43525073	2736	3649	23.1682 min, 3.213 s	0.119	867
5-Hydroxymethylfurfural	1.12	41.06	XIC(41.06Â±500ppm)	3047325	288	136	23.1682 min, 4.644 s	0.145	712
2-Coumaranone	1.07	78.06	XIC(78.06Â±500ppm)	20314624	630	686	23.1682 min, 4.682 s	0.162	904
2-Ethyl-2,3-dihydro-1H-indene	1.25	117.08	XIC(117.08Â±500ppm)	7433963	1586	1326	23.2516 min, 3.100 s	0.134	757
(1R,2R)-(-)-1,2-Diaminocyclohexane	1.22	56.07	XIC(56.07Â±500ppm)	2096740	376	298	23.2516 min, 3.876 s	0.162	708
Benzene, pentamethyl-	1.08	133.11	XIC(133.11Â±500ppm)	2488606	720	889	23.3349 min, 2.944 s	0.118	845
1H-Pyrrole-2,5-dione, 3-ethyl-4-methyl-	1.05	44.01	XIC(44.01Â±500ppm)	258642	126	9	23.3349 min, 3.808 s	0.115	763
Furan, 2-butyltetrahydro-	1.36	71.06	XIC(71.06Â±500ppm)	12539845	1637	1131	23.3349 min, 4.088 s	0.163	798
Quinoline	2.94	129.06	XIC(129.05Â±500ppm)	25807768	1846	1681	23.3349 min, 4.433 s	0.18	958
Benzonitrile, 3,4-dimethyl-	1.52	116.06	XIC(116.06Â±500ppm)	1899674	442	510	23.4183 min, 3.906 s	0.144	729
2-Ethyl-1-H-indene	1	129.08	XIC(129.08Â±500ppm)	2734265	372	385	23.5016 min, 3.365 s	0.128	823
2-Methyl-5-hydroxybenzofuran	1.03	148.06	XIC(148.06Â±500ppm)	1397386	425	864	23.5016 min, 3.727 s	0.125	752
2(3H)-Furanone, dihydro-5-propyl-	1.16	85.03	XIC(85.03Â±500ppm)	5086359	742	1178	23.5016 min, 5.171 s	0.178	756
Phenol, 4-ethyl-3-methyl-	1.17	121.07	XIC(121.07Â±500ppm)	50947732	2173	4312	23.5849 min, 3.277 s	0.114	892
1-Benzofuran-5-ol	1.21	134.04	XIC(134.04Â±500ppm)	9882308	3048	1794	23.5849 min, 3.954 s	0.139	903
Benzenepropanenitrile	1.51	91.06	XIC(91.06Â±500ppm)	46826165	5214	1936	23.5849 min, 4.567 s	0.169	899
3,4-Dimethoxytoluene	1.58	152.09	XIC(152.09Â±500ppm)	25240802	2556	2559	23.6683 min, 3.582 s	0.145	892
Benzene, 1,4-dimethyl-2-(2-methylpropyl)-	1.78	119.09	XIC(119.09Â±500ppm)	1746560	440	314	23.7516 min, 2.626 s	0.12	779
2-Butanone, 4-phenyl-	1.24	43.04	XIC(43.04Â±500ppm)	2830533	269	185	23.7516 min, 3.787 s	0.151	825
Naphthalene, decahydro-	1.6	138.07	XIC(138.07Â±500ppm)	1293065	677	387	23.835 min, 3.909 s	0.152	755
Furan, 2,5-dimethyl-	1.21	43.04	XIC(43.04Â±500ppm)	6911986	726	337	23.9183 min, 4.810 s	0.182	742
Phenol, 2-ethyl-4,5-dimethyl-	2.35	135.05	XIC(135.05Â±500ppm)	6556318	892	1120	24.0016 min, 3.486 s	0.14	798
2,3-Methylenedioxyanisole	1	152.06	XIC(152.06Â±500ppm)	2125761	362	486	24.0016 min, 4.082 s	0.488	719
2(3H)-Benzofuranone, 3-methyl-	1.12	120.07	XIC(120.07Â±500ppm)	8330463	1299	1406	24.0016 min, 4.209 s	0.147	908
5,6,7,8,9,10-Hexahydrobenzocyclooctene	0.52	91.06	XIC(91.06Â±500ppm)	609283	138	91	24.085 min, 2.764 s	0.1	789
Ethanone, 1-(2,5-dimethylphenyl)-	1.05	133.07	XIC(133.07Â±500ppm)	2069295	272	604	24.085 min, 3.520 s	0.137	818
Benzene, (1,3-dimethylbutyl)-	1.14	105.08	XIC(105.08Â±500ppm)	1254686	357	298	24.1683 min, 2.585 s	0.097	809
1-Butanone, 1-phenyl-	1.51	105.04	XIC(105.04Â±500ppm)	3891006	588	806	24.1683 min, 3.488 s	0.127	879
1H-Indene, 2,3-dimethyl-	1.39	129.08	XIC(129.08Â±500ppm)	28092424	3830	3293	24.335 min, 3.278 s	0.155	874
2-Allylphenol	1.13	134.08	XIC(134.08Â±500ppm)	1523906	414	452	24.335 min, 3.408 s	0.117	793
2-Naphthalenamine	1.26	143.04	XIC(143.04Â±500ppm)	1948500	708	751	24.335 min, 4.002 s	0.132	761
1H-1,2,4-Triazol-5-amine, 1-methyl-	2.78	43.05	XIC(43.05Â±500ppm)	15558708	712	656	24.4183 min, 3.625 s	0.133	722
Benzene, hexyl-	1.07	91.06	XIC(91.06Â±500ppm)	13603803	2490	1208	24.5017 min, 2.582 s	0.093	927
Phenol, 4-propyl-	1.18	107.05	XIC(107.05Â±500ppm)	20665122	1288	1865	24.5017 min, 3.232 s	0.112	914
1,2-Benzenediol, 3-methoxy-	1.07	125.03	XIC(125.03Â±500ppm)	2516222	494	967	24.5017 min, 4.011 s	0.136	871
Fenazaquin	2.05	145.07	XIC(145.07Â±500ppm)	6438489	570	2028	24.585 min, 3.165 s	0.113	776
Phenol, 3-ethyl-5-methyl-	1.91	121.07	XIC(121.07Â±500ppm)	22857893	1092	3437	24.585 min, 3.263 s	0.118	889
Phenol, 4-ethyl-2-methoxy-	0.52	137.07	XIC(137.07Â±500ppm)	3739240	316	1039	24.585 min, 3.418 s	0.115	737
Ethanone, 1-(2,4-dimethylphenyl)-	0.88	133.07	XIC(133.07Â±500ppm)	10054999	411	1619	24.585 min, 3.668 s	0.181	881
Benzofuran, 7-methoxy-	1.09	148.06	XIC(148.06Â±500ppm)	7010737	616	2653	24.585 min, 4.047 s	0.138	851
2-Methyl-6-propylphenol	2.71	121.07	XIC(121.07Â±500ppm)	1170848	300	270	24.7517 min, 3.265 s	0.152	706
Phenol, 2-methoxy-, acetate	1.09	124.06	XIC(124.06Â±500ppm)	4530655	477	1073	24.7517 min, 4.068 s	0.144	729
Phenol, 3,4,5-trimethyl-	1.32	121.07	XIC(121.07Â±500ppm)	11137953	700	1382	24.835 min, 3.373 s	0.117	849
3,5-Dimethoxytoluene	1.16	152.09	XIC(152.09Â±500ppm)	10100012	1132	2267	24.835 min, 3.519 s	0.128	866
3-Amino-s-triazole	1.22	84.05	XIC(84.05Â±500ppm)	2562748	516	535	24.835 min, 3.641 s	0.131	707
Methylphosphonic acid, 2TMS derivative	0.98	225.05	XIC(225.05Â±500ppm)	460274	317	590	24.9184 min, 2.391 s	0.123	701
2-Propenal, 3-phenyl-	1.27	131.06	XIC(131.06Â±500ppm)	1880097	345	290	24.9184 min, 4.244 s	0.147	799
1H-Indene, 1,1,3-trimethyl-	1.22	143.09	XIC(143.09Â±500ppm)	688268	232	269	25.0017 min, 3.104 s	0.138	765
Propiophenone, 2'-methyl-	1.35	119.06	XIC(119.06Â±500ppm)	5032065	805	902	25.0017 min, 3.493 s	0.124	848
Benzofuran-2-carboxaldehyde	1.2	145.04	XIC(145.04Â±500ppm)	1860973	740	675	25.0017 min, 4.453 s	0.156	778
Phenol, 2,3,6-trimethyl-	1.16	121.07	XIC(121.07Â±500ppm)	11788926	1732	1709	25.0851 min, 3.366 s	0.12	902
Octane, 2,6-dimethyl-	1.26	57.09	XIC(57.09Â±500ppm)	1717959	312	298	25.1684 min, 1.793 s	0.08	882
Ethanone, 1-(2,5-dihydroxyphenyl)-	1.02	137.03	XIC(137.03Â±500ppm)	4661678	627	1579	25.1684 min, 3.884 s	0.127	818
1H-Inden-1-one, 2,3-dihydro-	1.4	104.07	XIC(104.07Â±500ppm)	62823140	3144	3803	25.2517 min, 4.666 s	0.178	908
1H-Pyrrole, 1-phenyl-	1.09	143.08	XIC(143.08Â±500ppm)	2375623	426	690	25.3351 min, 3.794 s	0.123	806
2(3H)-Furanone, 3-acetyldihydro-3-methyl-	1.23	43.04	XIC(43.04Â±500ppm)	3597654	403	216	25.3351 min, 5.460 s	0.214	777
1,2,3-Trimethylindene	1.37	143.09	XIC(143.09Â±500ppm)	1869978	925	791	25.4184 min, 3.070 s	0.12	826
Naphthalene, 1-methyl-	1	141.08	XIC(141.08Â±500ppm)	1743487	167	743	25.4184 min, 3.656 s	0.112	711
o-Toluic acid, 4-nitrophenyl ester	1.28	119.05	XIC(119.05Â±500ppm)	3032645	752	699	25.5018 min, 3.560 s	0.128	922
Benzocycloheptatriene	1.21	141.08	XIC(141.08Â±500ppm)	4200549	1395	1596	25.5018 min, 3.600 s	0.129	742
3-Buten-2-one, 4-phenyl-	1.14	131.06	XIC(131.06Â±500ppm)	1397684	298	323	25.5851 min, 3.802 s	0.131	802
1H-Indene, 2,3-dihydro-1,1,3-trimethyl-	1.04	145.11	XIC(145.11Â±500ppm)	542218	189	183	25.6684 min, 2.902 s	0.11	746
1H-Inden-1-one, 2,3-dihydro-3,3-dimethyl-	1.04	145.07	XIC(145.07Â±500ppm)	18658148	1790	3292	25.6684 min, 3.242 s	0.12	821
1H-Inden-1-one, 2,3-dihydro-3-methyl-	1.26	117.08	XIC(117.08Â±500ppm)	13855351	2000	1322	25.6684 min, 4.237 s	0.163	832
6-Benzofuranylacetaldehyde	1.12	131.06	XIC(131.06Â±500ppm)	4901089	971	1413	25.9185 min, 3.218 s	0.111	864
Benzene, 1-(2-butenyl)-2,3-dimethyl-	4.23	145.11	XIC(145.11Â±500ppm)	1573464	278	470	26.0018 min, 2.949 s	0.123	739
Phenol, 2-methyl-5-(1-methylethyl)-	1.15	135.09	XIC(135.09Â±500ppm)	3199327	487	729	26.0018 min, 3.304 s	0.118	731
Benzene, 1,3,5-trimethyl-2-(1,2-propadienyl)-	3	143.09	XIC(143.09Â±500ppm)	570037	201	334	26.0851 min, 3.166 s	0.127	776
1,3-Di-O-acetyl-a-ÃŸ-d-ribopyranose	1.17	43.04	XIC(43.04Â±500ppm)	16739335	1613	798	26.2518 min, 4.081 s	0.154	751
1H-Indol-3-amine	1.31	132.07	XIC(132.07Â±500ppm)	1541886	165	414	26.4185 min, 4.133 s	0.222	783
2-Tridecene, (Z)-	0.83	55.08	XIC(55.08Â±500ppm)	1191083	232	179	26.5852 min, 1.965 s	0.068	894
5-Acetoxymethyl-2-furaldehyde	1.1	126.04	XIC(126.04Â±500ppm)	3393889	656	1503	26.7519 min, 4.239 s	0.135	860
Phenol, 3,5-diethyl-	1.21	135.09	XIC(135.09Â±500ppm)	3472352	630	710	26.9185 min, 3.175 s	0.111	753
Ethanone, 1-[4-(1-methylethenyl)phenyl]-	1.08	145.07	XIC(145.07Â±500ppm)	38644169	3377	5277	26.9185 min, 3.237 s	0.115	825
2-Methoxy-4-vinylphenol	1.1	135.05	XIC(135.05Â±500ppm)	5150234	820	1131	26.9185 min, 3.665 s	0.125	892
Phenol, 3,4,5-trimethyl-, methylcarbamate	1.08	121.07	XIC(121.07Â±500ppm)	1995265	304	482	27.0019 min, 3.565 s	0.126	782
2,5,6-Trimethylbenzimidazole	1.01	160.1	XIC(160.10Â±500ppm)	11155637	1132	3780	27.0852 min, 3.290 s	0.117	781
3-Heptanone, 2,4-dimethyl-	1.47	71.06	XIC(71.06Â±500ppm)	3483459	757	824	27.0852 min, 3.796 s	0.175	713
2-Methyl-1,3-oxazole-4-carbonitrile	1.1	108.05	XIC(108.05Â±500ppm)	5762194	931	944	27.0852 min, 4.035 s	0.129	746
1-Methyl-2-n-hexylbenzene	1.05	105.08	XIC(105.08Â±500ppm)	684057	219	168	27.1686 min, 2.560 s	0.101	752
3-Methoxy-5-methylphenol	1.19	138.08	XIC(138.08Â±500ppm)	2554216	391	725	27.2519 min, 3.773 s	0.128	816
Benzo[1,2-b:4,3-b']difuran	1.08	158.05	XIC(158.05Â±500ppm)	9643304	1094	3279	27.3352 min, 4.024 s	0.132	887
Benzene, 4-ethyl-1,2-dimethoxy-	1.47	151.08	XIC(151.08Â±500ppm)	5023785	1380	1196	27.4186 min, 3.452 s	0.131	839
Naphthalene, 1-azido-	1.23	141.06	XIC(141.06Â±500ppm)	893836	385	263	27.4186 min, 4.371 s	0.15	701
Naphthalene, 1,2-dihydro-7-methoxy-	1.04	160.1	XIC(160.10Â±500ppm)	34301471	3443	9987	27.5019 min, 3.286 s	0.122	780
Hex-1-enylbenzene	1.1	117.08	XIC(117.08Â±500ppm)	612838	256	175	27.5853 min, 2.813 s	0.089	872
Benzene, 1-methoxy-4-propyl-	1.19	121.07	XIC(121.07Â±500ppm)	2565988	610	631	27.5853 min, 3.186 s	0.109	769
Benzylcyclobutane	1.11	118.09	XIC(118.09Â±500ppm)	1789199	404	382	27.5853 min, 4.047 s	0.129	726
1-Naphthalenol, 4-methyl-	0.95	158.08	XIC(158.08Â±500ppm)	4427482	580	2055	27.6686 min, 3.494 s	0.127	816
1H-Indenol	1.15	132.06	XIC(132.06Â±500ppm)	2945681	860	914	27.6686 min, 4.096 s	0.139	865
1-Methyl-4-(1-pentyn-1-yl)benzene	3.23	129.08	XIC(129.08Â±500ppm)	732975	166	286	27.8353 min, 3.220 s	0.119	787
Phenol, 4-(2-propenyl)-, acetate	1.15	134.08	XIC(134.08Â±500ppm)	567013	169	175	28.002 min, 3.563 s	0.115	787
Benzoic acid, 4-methoxy-, methyl ester	1.34	135.05	XIC(135.05Â±500ppm)	2675621	554	650	28.002 min, 3.805 s	0.137	883
1,3-Benzodioxole, 5-propyl-	1.1	135.05	XIC(135.05Â±500ppm)	728271	211	225	28.0853 min, 3.336 s	0.11	711
1,4-Benzenedicarboxaldehyde, 2-methyl-	1.17	148.06	XIC(148.06Â±500ppm)	2167460	246	594	28.0853 min, 3.895 s	0.155	828
Cyclobuta[de]naphthalene	1.09	140.07	XIC(140.07Â±500ppm)	1252071	326	670	28.0853 min, 4.218 s	0.135	908
Phenol, 4-(2-propenyl)-	1.34	134.08	XIC(134.08Â±500ppm)	1590954	427	564	28.1686 min, 3.587 s	0.118	872
Naphthalene, 5-ethyl-1,2,3,4-tetrahydro-	1.05	131.07	XIC(131.07Â±500ppm)	827283	265	222	28.252 min, 3.090 s	0.106	739
1(3H)-Isobenzofuranone	1.32	105.04	XIC(105.02Â±500ppm)	4311422	837	836	28.252 min, 5.403 s	0.184	948
3-Penten-2-one, 4-phenyl-	1.04	160.1	XIC(160.10Â±500ppm)	10582321	1155	4604	28.3353 min, 3.393 s	0.123	779
1,4-Benzenediol, 2-methyl-	1.2	124.06	XIC(124.06Â±500ppm)	825829	301	289	28.3353 min, 4.148 s	0.129	732
7-Methylindan-1-one	1.4	146.08	XIC(146.08Â±500ppm)	10602988	2384	1855	28.3353 min, 4.305 s	0.156	864
Phenol, 3-methyl-6-propyl-	3.06	121.07	XIC(121.07Â±500ppm)	1351106	363	391	28.4187 min, 3.185 s	0.131	728
Phenol, 2,6-dimethoxy-	1.14	154.07	XIC(154.07Â±500ppm)	64365820	2231	4724	28.502 min, 4.243 s	0.143	880
2,5-Dimethoxyethylbenzene	2.57	166.11	XIC(166.11Â±500ppm)	2741770	234	1159	28.5853 min, 3.261 s	0.136	758
4-Hydroxy-3-methylacetophenone	1.42	135.09	XIC(135.09Â±500ppm)	1560652	390	331	28.5853 min, 3.292 s	0.145	742
7-Hydroxy-1-indanone	1.04	148.06	XIC(148.06Â±500ppm)	2200674	440	653	28.5853 min, 4.435 s	0.152	818
Eugenol	1.14	164.09	XIC(164.09Â±500ppm)	8779793	2257	2694	28.8354 min, 3.450 s	0.121	904
2H-1-Benzopyran-2-one, 3,4-dihydro-6-methyl-	1.16	134.08	XIC(134.08Â±500ppm)	1024680	290	355	28.9187 min, 3.997 s	0.133	781
3-Butylisobenzofuran-1(3H)-one	1.53	105.04	XIC(105.04Â±500ppm)	4819082	568	707	28.9187 min, 4.874 s	0.174	780
Benzene, heptyl-	1.05	92.07	XIC(92.07Â±500ppm)	7100588	2000	1154	29.002 min, 2.557 s	0.087	898
6-Methoxy-3-methylbenzofuran	1.06	162.08	XIC(162.08Â±500ppm)	7643427	846	3361	29.002 min, 3.821 s	0.132	802
2,5-Diethylphenol	1.51	135.09	XIC(135.09Â±500ppm)	1404342	320	292	29.0854 min, 3.324 s	0.116	772
Benzaldehyde, 4-hydroxy-	1.12	121.04	XIC(121.04Â±500ppm)	799928	186	199	29.0854 min, 4.222 s	0.124	828
2(3H)-Naphthalenone, 4,4a,5,6-tetrahydro-7-methyl-	1.07	134.08	XIC(134.08Â±500ppm)	750265	155	284	29.1687 min, 4.153 s	0.136	807
Phenol, 2-methoxy-4-propyl-	1.14	137.07	XIC(137.07Â±500ppm)	26712698	2541	3879	29.2521 min, 3.263 s	0.113	884
Propanoic acid, 3-chloro-	4.32	73.05	XIC(73.05Â±500ppm)	1358728	143	560	29.2521 min, 6.118 s	0.049	713
Toluene, 4-(1,1-dimethyl-2-propynyloxy)-	2.13	159.09	XIC(159.09Â±500ppm)	1860472	609	751	29.3354 min, 3.058 s	0.119	821
1(2H)-Naphthalenone, 3,4-dihydro-	1.29	118.05	XIC(118.05Â±500ppm)	757779	279	243	29.3354 min, 4.603 s	0.168	806
1-Naphthalenol, 2-methyl-	0.28	158.08	XIC(158.08Â±500ppm)	1057241	235	575	29.4187 min, 3.518 s	0.113	747
Naphthalene, 1,2,3,4-tetrahydro-1,4-dimethyl-	2.4	145.08	XIC(145.08Â±500ppm)	985921	146	367	29.4187 min, 3.989 s	0.203	754
Hydrocoumarin	1.12	120.07	XIC(120.07Â±500ppm)	4633365	1809	1075	29.8354 min, 5.031 s	0.165	890
1H-Inden-1-one, 2,3-dihydro-3,4,7-trimethyl-	1.09	145.07	XIC(145.07Â±500ppm)	3976461	749	889	29.9188 min, 3.147 s	0.113	787
1H-Indole, 4-methyl-	1.12	130.07	XIC(130.07Â±500ppm)	8674281	998	1786	29.9188 min, 4.508 s	0.145	920
11-Hexadecen-1-ol, (Z)-	0.69	55.08	XIC(55.08Â±500ppm)	679638	119	124	30.0021 min, 2.032 s	0.072	903
Benzene, 1-(1-methylethenyl)-2-(1-methylethyl)-	1.78	145.08	XIC(145.08Â±500ppm)	1542092	165	426	30.0855 min, 4.078 s	0.132	753
Naphthalene, 2-ethyl-	1.05	141.08	XIC(141.08Â±500ppm)	26075059	3025	5049	30.1688 min, 3.619 s	0.119	874
2-Acetylbenzofuran	1.31	145.04	XIC(145.04Â±500ppm)	1142795	287	387	30.1688 min, 4.403 s	0.153	727
Naphthalene, 1-ethyl-	1.05	141.08	XIC(141.08Â±500ppm)	28445472	1610	7396	30.3355 min, 3.760 s	0.126	908
1,1'-Biphenyl, 2-methyl-	1.08	168.1	XIC(168.10Â±500ppm)	4010272	1477	2547	30.5022 min, 3.557 s	0.124	913
1-Naphthalenecarboxaldehyde	1.04	156.07	XIC(156.07Â±500ppm)	1714705	349	862	30.5022 min, 4.048 s	0.13	761
Vanillin	1.15	151.05	XIC(151.05Â±500ppm)	12207741	4419	1939	30.5022 min, 4.566 s	0.151	878
Naphthalene, 1,7-dimethyl-	1.06	156.1	XIC(156.10Â±500ppm)	32752335	3304	9524	30.5855 min, 3.615 s	0.122	924
Biphenylene	1.14	152.07	XIC(152.07Â±500ppm)	9543592	2001	2256	30.5855 min, 4.052 s	0.133	918
2-Tetradecene, (E)-	0.99	55.08	XIC(55.08Â±500ppm)	601775	142	120	30.9189 min, 1.960 s	0.068	927
Benzene, 1,2,3-trimethoxy-5-methyl-	1.43	167.08	XIC(167.08Â±500ppm)	1678265	457	723	30.9189 min, 3.643 s	0.134	815
Naphthalene, 1,2,3,4-tetrahydro-1,6,8-trimethyl-	1.54	159.09	XIC(159.09Â±500ppm)	4848007	597	2086	31.0022 min, 3.160 s	0.106	806
Phenol, 2-(2-pentyn-4-yl)-4-methyl-	1.76	159.09	XIC(159.09Â±500ppm)	2179162	714	749	31.1689 min, 3.149 s	0.112	794
6-Methyl-4-indanol	0.49	133.07	XIC(133.07Â±500ppm)	698712	125	226	31.1689 min, 3.789 s	0.118	789
1H-Inden-1-one, 2,3-dihydro-5,7-dimethyl-	2.85	160.1	XIC(160.10Â±500ppm)	1504845	219	582	31.4189 min, 4.104 s	0.184	743
1H-Isoindole-1,3(2H)-dione, 2-methyl-	1.46	161.06	XIC(161.06Â±500ppm)	1595435	529	513	31.4189 min, 4.787 s	0.168	921
1H-Indene, 2,3-dihydro-1,4,7-trimethyl-	1.11	145.08	XIC(145.08Â±500ppm)	3490588	213	821	31.8356 min, 4.058 s	0.14	706
1-Naphthalenol, 5,8-dihydro-	1.12	131.06	XIC(131.06Â±500ppm)	800486	202	300	31.9189 min, 4.028 s	0.128	744
Benzofurane-3-carboxaldehyde, 2-methyl-	1.5	159.05	XIC(159.05Â±500ppm)	795791	298	294	31.9189 min, 4.253 s	0.155	793
Coumarin	1.6	118.05	XIC(118.05Â±500ppm)	3893484	1166	1007	32.0023 min, 5.288 s	0.181	905
4-Hydroxy-1-naphthaldehyde	1.06	171.06	XIC(171.06Â±500ppm)	8277273	1200	3859	32.3356 min, 3.910 s	0.126	852
Acenaphthylene	1.07	152.07	XIC(152.07Â±500ppm)	215530129	4918	16790	32.3356 min, 4.423 s	0.149	958
Naphthalene, 2-methoxy-	0.38	115.07	XIC(115.07Â±500ppm)	961669	228	249	32.5023 min, 4.158 s	0.137	773
Phenol, 4-methoxy-3-(methoxymethyl)-	1.14	168.09	XIC(168.09Â±500ppm)	9977180	1388	2971	32.5857 min, 3.938 s	0.132	733
Phenol, 2-methoxy-4-(1-propenyl)-	0.7	44.01	XIC(44.01Â±500ppm)	1888176	323	44	32.669 min, 3.607 s	0.117	757
Benzofuran, 5-methoxy-6,7-dimethyl-	1.02	161.07	XIC(161.07Â±500ppm)	2479779	459	1284	32.669 min, 3.679 s	0.125	775
Naphthalene, 2-(1-methylethyl)-	1.06	155.1	XIC(155.10Â±500ppm)	908556	290	424	32.7523 min, 3.443 s	0.116	852
5H-1-Pyrindine, 6,7-dihydro-4-amino-2,3-dimethyl-, hydrate	0.49	161.07	XIC(161.07Â±500ppm)	931531	164	513	32.8357 min, 3.848 s	0.133	743
Benzene, octyl-	1.09	92.07	XIC(92.07Â±500ppm)	4017594	1149	855	33.3357 min, 2.513 s	0.082	920
1H-Inden-1-one, 2,3-dihydro-4,7-dimethyl-	2.48	160.1	XIC(160.10Â±500ppm)	820065	178	442	33.3357 min, 4.140 s	0.151	843
Guaiacol, 4-butyl-	1.1	137.07	XIC(137.07Â±500ppm)	720492	337	332	33.4191 min, 3.173 s	0.102	704
Benzene, (1-methylheptyl)-	1.11	105.08	XIC(105.08Â±500ppm)	1940181	418	414	33.5024 min, 2.566 s	0.085	810
Azetidine, 1,1'-methylenebis[2-methyl-	1.14	84.05	XIC(84.05Â±500ppm)	1158035	482	420	33.5024 min, 2.644 s	0.087	791
1H-Inden-1-one, 2,3-dihydro-3,3,5,6-tetramethyl-	1.2	173.11	XIC(173.11Â±500ppm)	551344	280	418	33.5857 min, 3.028 s	0.1	756
Acenaphthene	1.09	153.08	XIC(153.08Â±500ppm)	10008722	1224	2824	33.8358 min, 4.241 s	0.137	951
Benzonitrile, 2,4,6-trimethyl-	1.09	130.07	XIC(130.07Â±500ppm)	1170684	278	489	33.9191 min, 4.332 s	0.136	721
1,1'-Biphenyl, 3-methyl-	1.1	168.1	XIC(168.10Â±500ppm)	14687533	2690	5800	34.0024 min, 3.658 s	0.118	921
Naphthalene, 1-propyl-	1.11	141.08	XIC(141.08Â±500ppm)	1192372	401	512	34.0858 min, 3.475 s	0.11	731
Apocynin	1.12	151.05	XIC(151.05Â±500ppm)	1832824	450	708	34.0858 min, 4.419 s	0.139	854
1,13-Tetradecadiene	1.24	55.08	XIC(55.08Â±500ppm)	516275	114	91	34.1691 min, 1.989 s	0.112	840
[truncated: 58 more rows]

[truncated: 20 more sheets: Morus spp (SPE14), Pithecellobium spp (SPE15), Shorea spp (SPE16), Solanum melongena (SPE17), Ficus religiosa (SPE18), Syzygium spp (SPE21), Ficus spp (SPE22), Vachellia spp (SPE23), Dalbergia sissoo (SPE24), Ricinus spp (SPE25), Holoptelea spp (SPE26), Sawdust (SPE29), Saraca indica (SPE30), Cow dung cake kikar mix (SPE31), Cow dung cake (SPE32), Cow dung cake (SPE33), MSW (SPE34), MSW (SPE35), MSW (SPE36), Sheet28]
