# Supplementary material for: Emissions of intermediate-volatility and semi-volatile organic compounds from domestic fuels used in Delhi, India
Source: Copernicus journal article supplement (doi:10.5194/acp-21-2407-2021), 2021-02-18
Supplement: Supplementary file 2 [file S8 - PTFE supplment blank corrected table.xlsx]

## Sheet: Notes
Key
	Wood
	Crop residue
	Charocal
	Sawdust
	Cow dung cake
	Municiapal solid waste
Notes on data processing
These peak tables have been complied by taking peak with unique mass spectra with NIST similarity > 700 and removing all peaks with the same identities as peaks in blank samples. Due to the nature of the large dataset presented, there may occasionally be rogue peaks with inccorect mass spectral assignments, which do not meet the above criteria and are concequently presented in the tables. Users a…
NIST Hit	Descriptor	Ref
>900	Excellent match	S. E. Stein, National Institute and Standards and Technology (NIST) Mass Spectral Search Program, Version 2.0g, 2011.
800-900	Good match	S. E. Stein, National Institute and Standards and Technology (NIST) Mass Spectral Search Program, Version 2.0g, 2011.
700-800	Fair match	S. E. Stein, National Institute and Standards and Technology (NIST) Mass Spectral Search Program, Version 2.0g, 2011.
Notes on sum of cow dung cake peaks by functionality
The peaks for cow dung cake (sample 32) have been manually assigned a functionality. The approach is approximate, intended to give an approximate idea of the types of functionalities present. The absolute number of peaks is not vitally important to the interpretation/analysis provided and should be treated as approximate due to a. Certain peaks may contain multiple functionalities b. Possibility …

## Sheet: Brassica spp (PTFE3)
Name	Tailing.Factor	Base.Mass	Quant.Masses	Area	Peak.S.N	Quant.S.N	R.T...min.	FWHH..s.	Similarity
2-Propanol, 1-(1-methylethoxy)-	1.34	43.14	XIC(43.14Â±500ppm)	479719596	793	7758	3.75002 min, 1.588 s	0.059	740
2-Methyl-2,4-pentanediol	1.69	59.05	XIC(59.05Â±500ppm)	313336144	145908	9465	3.83336 min, 1.665 s	0.591	768
2-Butanol	1.38	45.03	XIC(45.03Â±500ppm)	213274940	2697	3550	4.00004 min, 1.539 s	0.1	731
Propyl pyruvate	0.26	43.04	XIC(43.04Â±500ppm)	78384530	815	657	4.25006 min, 1.945 s	0.109	867
Borane, trimethyl-	2.15	41.03	XIC(41.03Â±500ppm)	63640164	943	1504	4.3334 min, 6.499 s	0.187	797
Oxalic acid, butyl propyl ester	1.06	43.07	XIC(43.07Â±500ppm)	204958607	637	5003	4.41674 min, 1.513 s	0.087	759
Ethanone, 1-cyclopropyl-	0.64	43.04	XIC(43.04Â±500ppm)	18418167	655	299	4.41674 min, 1.921 s	0.101	741
1H-Pyrrole, 1-methyl-	1.14	81.05	XIC(81.05Â±500ppm)	3146006	670	676	4.41674 min, 1.971 s	0.1	863
1-(2-Methoxyethoxy)-2-methyl-2-propanol, methyl ether	1.97	73.06	XIC(73.06Â±500ppm)	19278513	233	1881	4.66676 min, 6.467 s	0.105	781
Pyrrole	1.15	67.04	XIC(67.04Â±500ppm)	4902642	891	908	4.7501 min, 2.091 s	0.096	792
1-Oxa-3,4-diazacyclopentadiene	0.58	70.06	XIC(70.06Â±500ppm)	22469313	398	1659	4.91678 min, 1.577 s	0.05	804
2(5H)-Furanone	1.23	55.03	XIC(55.03Â±500ppm)	11366942	3244	1118	5.00012 min, 2.538 s	0.117	835
Cyclohexane, 1,2-dimethyl-, trans-	1.32	55.06	XIC(55.06Â±500ppm)	366319688	15124	16229	5.08346 min, 1.598 s	0.148	875
Furan, 2-methoxy-	1.25	83.04	XIC(83.04Â±500ppm)	4661827	1311	1291	5.50016 min, 2.087 s	0.117	751
Carbonocyanidic acid, ethyl ester	1.24	84.01	XIC(84.01Â±500ppm)	9724541	2833	2128	5.50016 min, 2.769 s	0.129	743
Isoamyl cyanide	0.95	55.05	XIC(55.05Â±500ppm)	12670267	709	959	6.75026 min, 2.416 s	0.171	712
1,4-Cyclohexadiene, 1,2-dimethyl-	1.08	93.06	XIC(93.06Â±500ppm)	1092838	238	340	7.08362 min, 2.001 s	0.119	780
Maleic anhydride	1.12	54.02	XIC(54.02Â±500ppm)	10347706	3218	1979	7.16696 min, 3.614 s	0.143	970
4-Cyclopentene-1,3-dione	1.12	96.01	XIC(96.01Â±500ppm)	7070916	1658	2262	8.0837 min, 3.377 s	0.144	870
o-Xylene	1.18	91.04	XIC(91.04Â±500ppm)	4602152	1141	801	8.33372 min, 2.368 s	0.138	863
Carbonic acid, butyl 2-pentyl ester	1.26	57.07	XIC(57.07Â±500ppm)	1314374	285	270	8.9171 min, 2.270 s	0.112	756
p-Benzoquinone	1.06	54.02	XIC(54.02Â±500ppm)	34690007	2048	4130	9.25046 min, 3.844 s	0.154	941
Bicyclo[3.1.1]hept-2-ene, 3,6,6-trimethyl-	1.21	93.06	XIC(93.06Â±500ppm)	8812331	4310	1834	9.83384 min, 1.989 s	0.166	899
1,2-Propadiene-1,3-dione	1.09	68.03	XIC(68.03Â±500ppm)	5449761	773	1131	10.3339 min, 3.972 s	0.146	824
Cyclopentene, 1-butyl-	1.54	67.05	XIC(67.05Â±500ppm)	622076	162	155	10.4172 min, 1.995 s	0.096	841
2-Ethynyl pyridine	1.29	103.03	XIC(103.03Â±500ppm)	2184021	614	576	12.0007 min, 3.659 s	0.155	877
Cyclopropane, 1-hexyl-2-methyl-	0.97	41.05	XIC(41.05Â±500ppm)	4304843	547	180	12.334 min, 1.840 s	0.084	869
1H-Pyrrole-2,5-dione	1.19	97	XIC(97.00Â±500ppm)	2836268	414	1281	12.334 min, 4.094 s	0.145	919
1,3,8-p-Menthatriene	0.94	91.04	XIC(91.04Â±500ppm)	6212029	600	656	12.8341 min, 2.341 s	0.122	867
Butanamide, 3-methyl-	1.25	59.04	XIC(59.04Â±500ppm)	2153937	655	537	12.8341 min, 3.445 s	0.159	801
p-Benzoquinone, 2-methyl-	1.05	54.02	XIC(54.02Â±500ppm)	4489718	488	755	13.1674 min, 3.963 s	0.148	893
1,3-Cyclohexadiene, 1-methyl-4-(1-methylethyl)-	0.76	93.06	XIC(93.06Â±500ppm)	251780	112	99	13.3341 min, 2.256 s	0.11	746
Benzoxazole	1.5	119.02	XIC(119.02Â±500ppm)	1242562	578	430	13.4175 min, 3.568 s	0.167	808
Cyclohexane, 1,3-butadienylidene-	1.05	91.04	XIC(91.04Â±500ppm)	5052274	787	1031	13.6675 min, 2.472 s	0.148	797
Benzene, 1-propenyl-	1.1	117.06	XIC(117.06Â±500ppm)	898172	239	424	13.7508 min, 2.870 s	0.116	875
Benzeneacetaldehyde	1.13	91.04	XIC(91.04Â±500ppm)	4263861	621	725	14.5842 min, 3.739 s	0.142	882
Benzene, n-butyl-	1.18	91.04	XIC(91.04Â±500ppm)	1951029	541	445	15.1676 min, 2.549 s	0.114	881
Carbamic acid, methyl-, 3-methylphenyl ester	1.2	108.05	XIC(108.05Â±500ppm)	1141385	385	517	15.2509 min, 3.179 s	0.126	720
2,5-Furandicarboxaldehyde	1.1	124	XIC(124.00Â±500ppm)	2523466	1115	1710	16.1677 min, 4.768 s	0.159	922
Oxalic acid, 2-ethylhexyl hexyl ester	1.31	57.08	XIC(57.08Â±500ppm)	1280847	238	305	16.6677 min, 1.831 s	0.141	817
Benzene, 1-methyl-4-(1-methylethenyl)-	1.08	117.06	XIC(117.06Â±500ppm)	3425337	867	1265	16.6677 min, 2.826 s	0.117	906
4-Pyridinone	1.17	95.04	XIC(95.04Â±500ppm)	2342160	762	1133	17.5011 min, 3.525 s	0.122	874
2,6-Dimethyl-1,3,5,7-octatetraene, E,E-	1.18	91.06	XIC(91.06Â±500ppm)	227579	136	112	17.7511 min, 2.699 s	0.118	832
Levoglucosenone	1.09	68.04	XIC(68.04Â±500ppm)	863163	520	319	17.8345 min, 4.721 s	0.177	853
Benzene, 1-chloro-2-isocyanato-	1.16	153	XIC(153.00Â±500ppm)	573849	388	498	18.8346 min, 3.241 s	0.114	865
Benzyl nitrile	1.18	117.05	XIC(117.05Â±500ppm)	720066	348	443	19.0012 min, 4.413 s	0.153	892
Phenol, 2,4-dimethyl-	1.05	107.03	XIC(107.03Â±500ppm)	740777	454	360	19.5013 min, 3.272 s	0.121	758
Methyl-a-d-ribofuranoside	1.04	57.04	XIC(57.04Â±500ppm)	18997385	780	2448	20.0013 min, 5.073 s	0.165	747
Benzoic acid	1.17	105.02	XIC(105.02Â±500ppm)	5489905	997	1041	20.168 min, 3.230 s	0.115	908
Phenol, 2,4-dichloro-	1.12	161.95	XIC(161.95Â±500ppm)	283642	189	373	20.2513 min, 3.429 s	0.12	779
Phenol, 4-ethyl-	1.18	107.04	XIC(107.04Â±500ppm)	7494579	830	1332	20.418 min, 3.267 s	0.116	913
Cyclobutane-1,1-dicarboxamide, N,N'-di-benzoyloxy-	0.82	122.04	XIC(122.04Â±500ppm)	1713312	136	695	20.5014 min, 3.295 s	0.181	706
Benzene, 1,2,4-trichloro-	0.98	105.02	XIC(179.94Â±500ppm)	446289	230	528	20.5847 min, 3.335 s	0.112	734
Ethanone, 1-(4-methylphenyl)-	1.29	119.04	XIC(119.04Â±500ppm)	11237073	1667	2029	21.0847 min, 3.724 s	0.135	862
Benzenemethanol, a,a,4-trimethyl-	1.11	43.03	XIC(43.03Â±500ppm)	6095440	515	314	21.1681 min, 3.269 s	0.126	825
1,2-Naphthalenedione	1.17	102.04	XIC(102.04Â±500ppm)	1689669	1110	609	21.1681 min, 4.262 s	0.145	902
3,5-Nonadien-7-yn-2-ol, (E,E)-	1.28	43.03	XIC(43.03Â±500ppm)	2901002	594	223	21.9181 min, 3.604 s	0.158	815
5-Methyl-1,3-cyclohexanedione	1.16	69	XIC(69.00Â±500ppm)	3530491	869	755	21.9181 min, 5.664 s	0.189	747
Catechol	1.08	110.02	XIC(110.02Â±500ppm)	1080775	448	494	22.0015 min, 3.516 s	0.116	827
1,4:3,6-Dianhydro-a-d-glucopyranose	1.11	69.04	XIC(69.04Â±500ppm)	8944226	1286	959	22.1682 min, 4.826 s	0.178	872
1,3-Butadiene, 1,1,2,3,4,4-hexachloro-:2	1.11	44	XIC(224.85Â±500ppm)	161848	133	230	22.5015 min, 2.758 s	0.128	807
2,3-Anhydro-d-galactosan	0.54	43.03	XIC(43.03Â±500ppm)	500120	158	36	22.6682 min, 4.950 s	0.194	776
Benzofuran, 2,3-dihydro-	1.14	120.05	XIC(120.05Â±500ppm)	20392864	2579	2738	22.7515 min, 3.553 s	0.119	839
2,3-Anhydro-d-mannosan	0.51	44.03	XIC(44.03Â±500ppm)	2243612	260	40	22.9182 min, 4.852 s	0.155	813
m-Guaiacol	1.67	94.03	XIC(124.05Â±500ppm)	474826	142	228	23.1682 min, 3.809 s	0.142	NA
5-Hydroxymethylfurfural	1.09	41.05	XIC(41.05Â±500ppm)	583528	187	53	23.1682 min, 4.656 s	0.147	767
2-Coumaranone	1.13	78.05	XIC(78.05Â±500ppm)	909330	169	71	23.2516 min, 4.652 s	0.145	862
1H-Pyrrole-2,5-dione, 3-ethyl-4-methyl-	1.13	67.06	XIC(67.06Â±500ppm)	422933	241	98	23.3349 min, 3.815 s	0.13	790
Benzenepropanenitrile	1.6	91.05	XIC(91.05Â±500ppm)	3320788	765	484	23.5849 min, 4.572 s	0.17	799
Pentadecafluorooctanoic acid, 2-ethylhexyl ester	1.13	57.05	XIC(57.05Â±500ppm)	612502	188	186	23.6683 min, 2.299 s	0.102	722
Heptane, 3,5-dimethyl-	2.17	57.08	XIC(57.08Â±500ppm)	3853480	526	764	23.835 min, 1.818 s	0.13	842
2,3-Dioxabicyclo[2.2.1]heptane	1.06	56.04	XIC(56.04Â±500ppm)	771682	118	140	24.1683 min, 5.528 s	0.164	742
Octane, 2,6,6-trimethyl-	2.05	57.08	XIC(57.08Â±500ppm)	2375074	576	389	24.5017 min, 1.859 s	0.19	785
Decane, 2,2,7-trimethyl-	1.42	57.08	XIC(57.08Â±500ppm)	8117341	952	1099	24.835 min, 1.824 s	0.105	814
1-Naphthalenol	1.13	115.05	XIC(115.05Â±500ppm)	1171887	195	296	25.0851 min, 3.957 s	0.126	845
Hydroquinone	1.13	110.03	XIC(110.03Â±500ppm)	12537355	1355	2216	25.2517 min, 4.156 s	0.137	886
1H-Inden-1-one, 2,3-dihydro-	1.26	104.05	XIC(104.05Â±500ppm)	808212	319	229	25.2517 min, 4.676 s	0.164	852
Resorcinol	1.12	110.03	XIC(110.03Â±500ppm)	20607714	1889	2788	25.8351 min, 3.981 s	0.13	938
2-Propenenitrile, 3-phenyl-, (E)-	1.6	129.05	XIC(129.05Â±500ppm)	3063176	1011	951	25.9185 min, 4.424 s	0.153	910
2-Tridecene, (Z)-	0.92	55.07	XIC(55.07Â±500ppm)	3199690	369	363	26.0018 min, 1.955 s	0.071	903
2-Allylphenol	1.1	134.06	XIC(134.06Â±500ppm)	988067	225	470	26.0018 min, 3.528 s	0.114	754
Indole	1.1	117.05	XIC(117.05Â±500ppm)	4031879	1018	1297	26.0018 min, 4.667 s	0.154	922
1,3-Di-O-acetyl-a-ÃŸ-d-ribopyranose	1.17	43.03	XIC(43.03Â±500ppm)	3169393	275	212	26.2518 min, 4.086 s	0.141	741
1,1'-Bicyclohexyl	1.09	82.07	XIC(82.07Â±500ppm)	418447	143	151	26.3352 min, 2.548 s	0.105	851
Ethyl 2,3-epoxybutyrate	1.07	45.05	XIC(45.05Â±500ppm)	8967368	717	398	26.4185 min, 5.322 s	0.184	716
Benzene, 1,2-dichloro-4-isocyanato-	1.27	186.95	XIC(186.95Â±500ppm)	301889	180	398	26.5018 min, 3.386 s	0.102	899
Benzaldehyde, 3-hydroxy-	1.17	122.02	XIC(122.02Â±500ppm)	5831914	1712	1349	26.6685 min, 4.093 s	0.133	947
1H-Inden-1-one, 2,3-dihydro-3-methyl-	1.57	131.04	XIC(131.04Â±500ppm)	711035	213	217	26.9185 min, 4.286 s	0.164	750
1-Benzofuran-5-ol	1.17	134.02	XIC(134.02Â±500ppm)	842054	273	403	27.1686 min, 4.018 s	0.128	851
3-Methoxy-5-methylphenol	1.15	138.06	XIC(138.06Â±500ppm)	1708707	274	712	27.3352 min, 3.760 s	0.124	890
1,3-Benzenediol, 2-methyl-	1.15	124.04	XIC(124.04Â±500ppm)	3701164	539	1319	27.6686 min, 4.070 s	0.137	874
2-Propenal, 3-phenyl-	1.06	132.05	XIC(132.05Â±500ppm)	523238	269	250	27.6686 min, 4.103 s	0.135	750
1,2-Cyclohexanediol, 1-methyl-4-(1-methylethenyl)-	2.52	43.03	XIC(43.03Â±500ppm)	868656	103	71	28.002 min, 3.451 s	0.141	825
6-APDB	1.38	44	XIC(44.00Â±500ppm)	3153867	113	78	28.1686 min, 3.604 s	0.05	761
1,4-Benzenediol, 2-methyl-	1.3	124.04	XIC(124.04Â±500ppm)	569947	185	315	28.3353 min, 4.157 s	0.13	821
Phenol, 2,4,6-trichloro-	1	44	XIC(195.93Â±500ppm)	147655	114	168	28.502 min, 3.602 s	0.048	845
1,4-Benzenedicarboxaldehyde, 2-methyl-	1.17	148.04	XIC(148.04Â±500ppm)	453509	212	298	28.502 min, 3.940 s	0.128	839
Orcinol	1.19	124.04	XIC(124.04Â±500ppm)	5721335	1800	1713	28.5853 min, 4.064 s	0.131	862
Phenol, 2,4,5-trichloro-	1.3	44	XIC(195.93Â±500ppm)	320894	113	282	28.6687 min, 3.601 s	0.048	752
Eugenol	1.11	164.07	XIC(164.07Â±500ppm)	654611	407	454	28.8354 min, 3.455 s	0.117	857
Sulfurous acid, 2-ethylhexyl isobutyl ester	0.99	57.08	XIC(57.08Â±500ppm)	19474630	770	1927	29.1687 min, 1.891 s	0.137	760
Benzonitrile, 4-hydroxy-	1.25	119.03	XIC(119.03Â±500ppm)	1090510	362	360	29.1687 min, 3.989 s	0.124	804
Naphthalene, 2-chloro-	1.06	162.01	XIC(162.03Â±500ppm)	459857	210	443	29.3354 min, 3.982 s	0.121	716
1,6-Anhydro-3,4-dideoxy-ÃŸ-D-gluco-hexopyranose	4.13	44.01	XIC(44.01Â±500ppm)	479516	170	14	29.3354 min, 5.677 s	0.167	808
Phenol, 4-propyl-	0.65	107.04	XIC(107.04Â±500ppm)	2291427	524	644	29.4187 min, 4.440 s	0.154	848
L-Proline, 5-oxo-, methyl ester	1.14	84.04	XIC(84.04Â±500ppm)	11280067	1777	1940	29.5021 min, 5.157 s	0.165	867
1,3-Benzenediol, 2,5-dimethyl-	1.67	138.06	XIC(138.06Â±500ppm)	637844	220	323	29.7521 min, 4.145 s	0.13	822
4-Undecene, 3-methyl-, (E)-	0.95	55.07	XIC(55.07Â±500ppm)	1635711	325	247	30.0855 min, 1.937 s	0.163	713
4,5,6-Trimethyl-2-pyrimidone	1.16	42.05	XIC(42.05Â±500ppm)	2024135	367	117	30.0855 min, 4.849 s	0.166	709
Benzeneacetamide	1.31	91.05	XIC(91.05Â±500ppm)	1763386	819	231	30.2521 min, 5.260 s	0.192	823
3-Hydroxy-2-methylbenzaldehyde	1.11	135.03	XIC(135.03Â±500ppm)	2911952	420	575	30.4188 min, 4.118 s	0.126	857
Ethanone, 1-(3-hydroxyphenyl)-	1.12	121.02	XIC(121.02Â±500ppm)	4425480	1615	1471	30.5022 min, 4.220 s	0.137	909
Vanillin	1.12	151.03	XIC(151.03Â±500ppm)	15365831	4106	3132	30.5022 min, 4.581 s	0.151	930
Benzene, (cyclohexylmethyl)-	1.14	92.05	XIC(92.05Â±500ppm)	295380	109	82	30.5855 min, 3.068 s	0.098	786
1,3-Isobenzofurandione, 4-methyl-	1.12	90.04	XIC(90.04Â±500ppm)	849594	234	323	30.6688 min, 4.701 s	0.138	904
1H-Inden-1-ol, 2,3-dihydro-2-methyl-	0.56	148.04	XIC(148.04Â±500ppm)	643041	165	354	30.8355 min, 4.083 s	0.17	705
1,4-Naphthalenedione	1.1	158.03	XIC(158.03Â±500ppm)	1038215	258	545	30.8355 min, 5.085 s	0.153	897
2-Methyl-5-hydroxybenzofuran	0.96	147.03	XIC(147.03Â±500ppm)	1133996	245	455	30.9189 min, 3.959 s	0.139	745
Phenol, 5-methoxy-2,3-dimethyl-	1.18	152.07	XIC(152.07Â±500ppm)	1091564	392	410	31.0855 min, 3.701 s	0.122	790
5-Methyl-2-allylphenol	1.22	148.08	XIC(148.08Â±500ppm)	267579	126	133	31.3356 min, 3.531 s	0.11	786
Benzoic acid, 3-hydroxy-, methyl ester	1.18	121.02	XIC(121.02Â±500ppm)	3773536	531	880	31.7523 min, 3.897 s	0.124	875
Acetate, (2,4a,5,8a-tetramethyl-1,2,3,4,4a,7,8,8a-octahydro-1-naphthalenyl) ester	1	105.06	XIC(105.06Â±500ppm)	285854	187	87	31.9189 min, 2.843 s	0.104	704
1-Naphthalenol, 5,8-dihydro-	1.07	131.04	XIC(131.04Â±500ppm)	745044	243	239	31.9189 min, 4.040 s	0.128	801
4-Hydroxy-3-methylbenzaldehyde	1.14	135.04	XIC(135.04Â±500ppm)	2564719	972	634	31.9189 min, 4.255 s	0.139	894
1,3-Benzenediol, 4-ethyl-	1.13	123.04	XIC(123.04Â±500ppm)	1638929	408	574	32.0023 min, 3.971 s	0.125	831
3,5-Dimethoxybenzaldehyde	1.07	166.05	XIC(166.05Â±500ppm)	441518	160	297	32.0856 min, 4.205 s	0.131	786
4-Methylphthalic anhydride	1.13	118.04	XIC(118.04Â±500ppm)	1641852	309	595	32.0856 min, 4.724 s	0.139	888
Acetophenone, 4'-hydroxy-	1.15	121.02	XIC(121.02Â±500ppm)	8036091	1426	1638	32.3356 min, 4.346 s	0.141	907
Acenaphthylene	1.08	152.05	XIC(152.06Â±500ppm)	6317686	775	1494	32.3356 min, 4.434 s	0.141	927
6-Methyl-4-indanol	2.81	133.06	XIC(133.06Â±500ppm)	588702	218	251	32.5023 min, 3.858 s	0.123	830
5-Isopropyl-2,4-imidazolidinedione	1.11	100.02	XIC(100.02Â±500ppm)	16511786	2080	3279	32.5023 min, 4.940 s	0.163	911
Tridecane, 1-iodo-	0.89	57.08	XIC(57.08Â±500ppm)	10662039	205	1174	32.5857 min, 1.952 s	0.081	806
Phenol, 2-methoxy-4-(1-propenyl)-	1.13	164.07	XIC(164.07Â±500ppm)	4161089	1390	1601	32.669 min, 3.616 s	0.119	927
p-Hydroxyphenylacetone	1.14	107.04	XIC(107.04Â±500ppm)	4143256	1207	1177	32.669 min, 4.406 s	0.141	896
4-Hydroxy-2-methylbenzaldehyde	1.13	135.04	XIC(135.04Â±500ppm)	585090	136	174	32.8357 min, 4.275 s	0.137	738
5-Hydroxy-3-methyl-1-indanone	1.09	162.06	XIC(162.06Â±500ppm)	475341	145	300	33.0024 min, 3.881 s	0.127	701
Methylparaben	1.32	121.02	XIC(121.02Â±500ppm)	2939751	1003	885	33.0024 min, 4.022 s	0.136	849
Phenol, 2-methoxy-4-propyl-	1.57	137.05	XIC(137.05Â±500ppm)	4006516	615	1501	33.0024 min, 4.412 s	0.154	851
1H-Isoindole-1,3(2H)-dione, 2-(hydroxymethyl)-	1.16	76.03	XIC(76.03Â±500ppm)	4513127	713	750	33.0024 min, 5.220 s	0.171	950
ÃŸ-D-Glucopyranoside, methyl 3,6-anhydro-	0.91	73.03	XIC(73.03Â±500ppm)	2647532	327	423	33.0024 min, 5.290 s	0.184	736
Guanidineacetic acid	0.51	43.04	XIC(43.04Â±500ppm)	1560784	188	103	33.0857 min, 4.917 s	0.154	702
1,3-2H-Isobenzofuranone, 3,3,7-trimethyl-	1.52	161.05	XIC(161.05Â±500ppm)	2654934	570	973	33.3357 min, 4.153 s	0.15	782
2H-Indol-2-one, 1,3-dihydro-	1.21	104.04	XIC(104.04Â±500ppm)	1055229	396	250	33.3357 min, 5.304 s	0.173	843
1,3-Benzenediol, 4,5-dimethyl-	1.08	123.04	XIC(123.04Â±500ppm)	3240566	445	1014	33.4191 min, 3.980 s	0.124	821
Tridecane, 6-propyl-	1.33	57.08	XIC(57.08Â±500ppm)	2781490	260	415	33.5857 min, 1.874 s	0.091	863
ÃŸ-D-Glucopyranose, 1,6-anhydro-	0.98	60.03	XIC(60.03Â±500ppm)	179582175	11466	8248	33.5857 min, 5.546 s	0.193	908
6-Methoxy-3-methylbenzofuran	1.02	162.08	XIC(162.08Â±500ppm)	25045363	1223	3223	33.6691 min, 4.197 s	0.145	723
Benzeneacetonitrile, 4-hydroxy-	1.16	133.04	XIC(133.04Â±500ppm)	1014383	372	328	33.7524 min, 4.963 s	0.162	887
Benzene, 1-(1,5-dimethyl-4-hexenyl)-4-methyl-	0.41	44	XIC(44.00Â±500ppm)	502385	228	13	34.0024 min, 2.618 s	0.089	879
4-Hydroxy-3-methylacetophenone	1.15	135.04	XIC(135.04Â±500ppm)	2148851	390	600	34.0858 min, 4.141 s	0.131	860
Apocynin	1.12	151.03	XIC(151.03Â±500ppm)	14088755	2729	2546	34.0858 min, 4.432 s	0.143	886
Naphthalene, 1-isocyano-	1.79	153.05	XIC(153.05Â±500ppm)	1148481	544	383	34.2525 min, 4.789 s	0.17	820
1-Propanone, 1-(4-hydroxyphenyl)-2-methyl-	1.09	121.02	XIC(121.02Â±500ppm)	1771778	446	569	34.3358 min, 4.052 s	0.128	797
1-Pentadecene	1.09	55.07	XIC(55.07Â±500ppm)	4428190	583	408	34.4191 min, 1.952 s	0.064	936
3-Methoxy-5-propylphenol	1.22	138.06	XIC(138.06Â±500ppm)	758528	279	338	34.6692 min, 3.553 s	0.112	853
2-Naphthalenecarboxaldehyde	1.33	127.04	XIC(127.04Â±500ppm)	529953	155	184	34.6692 min, 4.778 s	0.138	745
5H-1-Pyrindine, 6,7-dihydro-4-amino-2,3-dimethyl-, hydrate	1.09	161.05	XIC(161.05Â±500ppm)	462804	144	237	34.7525 min, 3.960 s	0.118	720
1,4-Benzenediol, 2,3,5-trimethyl-	1.12	137.05	XIC(137.05Â±500ppm)	409209	149	196	34.8358 min, 4.156 s	0.128	737
Ethanone, 1-(2,5-dihydroxyphenyl)-	1.04	137.02	XIC(137.02Â±500ppm)	1969072	271	649	35.0025 min, 4.357 s	0.129	822
Menadione	1.14	104.03	XIC(104.03Â±500ppm)	683992	162	166	35.0859 min, 4.680 s	0.16	819
2-Hexanol, acetate	0.24	43.03	XIC(43.03Â±500ppm)	1834687	123	127	35.0859 min, 4.951 s	0.224	729
Phenylpropanamide	3.34	91.05	XIC(91.05Â±500ppm)	3278718	318	356	35.1692 min, 5.155 s	0.196	776
4-Hydroxy-3-methylbenzoic acid, methyl ester	3.63	135.03	XIC(135.03Â±500ppm)	1088318	225	321	35.2525 min, 3.878 s	0.123	855
2H-1-Benzopyran-2-one, 3,4-dihydro-6-hydroxy-	1.1	122.03	XIC(122.03Â±500ppm)	6197976	2141	1366	35.2525 min, 5.084 s	0.163	786
Benzoic acid, 4-hydroxy-3-methoxy-, methyl ester	1.08	151.03	XIC(151.03Â±500ppm)	2103005	313	695	35.3359 min, 4.116 s	0.134	853
2-Naphthalenol	1.14	144.05	XIC(144.05Â±500ppm)	14171930	1021	2666	35.3359 min, 4.534 s	0.141	931
Carbonic acid, decyl undecyl ester	1.69	57.08	XIC(57.08Â±500ppm)	1534782	278	238	35.6692 min, 1.859 s	0.168	843
Benzene, 1,2,3-trimethoxy-5-methyl-	1.11	167.06	XIC(167.06Â±500ppm)	18413899	3399	4295	35.7526 min, 3.754 s	0.126	769
2-Propanone, 1-(4-hydroxy-3-methoxyphenyl)-	1.1	137.05	XIC(137.05Â±500ppm)	28130519	1587	4802	35.9193 min, 4.305 s	0.135	844
Benzoic acid, 2-(cyanomethyl)-	1.16	161.04	XIC(161.04Â±500ppm)	2001470	301	613	36.2526 min, 4.909 s	0.15	732
2,4-Imidazolidinedione, 5-(2-methylpropyl)-, (S)-	1.1	100.02	XIC(100.02Â±500ppm)	11354066	825	2761	36.336 min, 4.639 s	0.149	822
1-Phthalanol, 1,3,3-trimethyl-	1.27	145.05	XIC(145.05Â±500ppm)	1018667	309	334	36.586 min, 3.993 s	0.16	745
Undecylenic acid	0.96	55.07	XIC(55.07Â±500ppm)	438010	102	79	36.9193 min, 2.498 s	0.08	801
1,3-Benzenediol, 5-pentyl-	1.11	124.04	XIC(124.04Â±500ppm)	4321076	963	1246	36.9193 min, 3.852 s	0.122	779
2H-1-Benzopyran-2-one, 8-hydroxy-	1.07	134.03	XIC(134.03Â±500ppm)	4814011	1487	1118	36.9193 min, 5.235 s	0.166	901
1H-Inden-1-one, 2,3-dihydro-3,3-dimethyl-	1.24	145.06	XIC(145.06Â±500ppm)	1428399	244	364	37.086 min, 4.000 s	0.13	770
3-(4-Hydroxyphenyl)propionitrile	1.11	107.04	XIC(107.04Â±500ppm)	6845787	1972	1506	37.1694 min, 5.079 s	0.159	907
Ethanone, 1-(3,4-dimethoxyphenyl)-	0.36	165.05	XIC(165.05Â±500ppm)	1443178	196	549	37.2527 min, 4.409 s	0.14	884
2,6-Dimethoxybenzoquinone	1.06	69.01	XIC(69.01Â±500ppm)	10878149	2422	1397	37.2527 min, 5.852 s	0.186	925
1,6-Anhydro-ÃŸ-D-glucofuranose	1.09	73.03	XIC(73.03Â±500ppm)	3800926	728	630	37.5027 min, 5.399 s	0.175	862
Fluorene	1.07	166.07	XIC(166.07Â±500ppm)	1392265	365	722	37.5861 min, 4.271 s	0.134	824
4-(1-Hydroxyallyl)-2-methoxyphenol	1.03	137.05	XIC(137.05Â±500ppm)	3709308	606	988	37.5861 min, 4.352 s	0.135	885
5-Methyl-2H-isoindole-1,3-dione	1.14	161.04	XIC(161.04Â±500ppm)	1967244	303	503	37.5861 min, 4.977 s	0.146	833
Oxirane, dodecyl-	1.28	43.07	XIC(43.07Â±500ppm)	376622	106	48	37.6694 min, 2.331 s	0.078	884
Tyramine, N-pentafluoropropionyl-	1.28	107.04	XIC(107.04Â±500ppm)	2773753	499	703	37.8361 min, 4.111 s	0.126	746
Ethanone, 1-(3-hydroxy-4-methoxyphenyl)-	1.39	151.03	XIC(151.03Â±500ppm)	6795810	355	1744	37.8361 min, 4.172 s	0.148	710
Nonane, 4,5-dimethyl-	1.13	57.08	XIC(57.08Â±500ppm)	787615	206	155	38.0028 min, 1.913 s	0.204	717
Butyrovanillone	1.07	151.03	XIC(151.03Â±500ppm)	4296301	662	1577	38.0861 min, 4.175 s	0.13	896
1,6:2,3-Dianhydro-4-O-acetyl-ÃŸ-d-gulopyranose	1.07	43.03	XIC(43.03Â±500ppm)	28708915	1451	948	38.0861 min, 4.759 s	0.17	706
4-Hydroxy-1-indanone	1.09	91.05	XIC(91.05Â±500ppm)	4646262	740	393	38.6695 min, 5.117 s	0.168	881
Phenol, 2,6-dimethoxy-4-(2-propenyl)-	1.11	194.08	XIC(194.08Â±500ppm)	7842551	1340	2751	38.7528 min, 3.770 s	0.124	906
Benzaldehyde, 3,4,5-trimethoxy-	1.21	196.06	XIC(196.06Â±500ppm)	1022176	342	557	38.7528 min, 4.313 s	0.146	756
7-Methyl-1-naphthol	1.05	158.06	XIC(158.06Â±500ppm)	5572873	516	1329	38.9195 min, 4.381 s	0.143	895
Homosyringaldehyde	1.52	44	XIC(44.00Â±500ppm)	4792968	118	85	39.0028 min, 3.563 s	0.047	722
3,4,5-Trimethoxyphenol	1.17	169.04	XIC(169.04Â±500ppm)	5377722	1014	1463	39.0028 min, 4.422 s	0.144	894
2(3H)-Benzofuranone, 3-methyl-	1.09	120.05	XIC(120.05Â±500ppm)	5928033	1035	1165	39.0862 min, 5.034 s	0.159	838
1-Naphthalenol, 4-methyl-	1.17	158.06	XIC(158.06Â±500ppm)	6812208	748	1368	39.2529 min, 4.400 s	0.141	832
1H-Inden-1-one, 2,3-dihydro-7-hydroxy-3-methyl-	1.07	147.04	XIC(147.04Â±500ppm)	2638851	279	550	39.3362 min, 4.673 s	0.146	806
6-Hydroxy-4-methylcoumarin	1.05	176.04	XIC(176.04Â±500ppm)	2082416	252	738	39.6696 min, 4.766 s	0.138	815
Disulfide, di-tert-dodecyl	3.47	57.08	XIC(57.08Â±500ppm)	987488	179	167	39.7529 min, 1.870 s	0.143	808
1-Naphthalenol, 2-methyl-	1.11	158.06	XIC(158.06Â±500ppm)	802318	209	338	39.7529 min, 4.529 s	0.134	730
Benzaldehyde, 2-hydroxy-3-(2-propenyl)-	1.13	162.06	XIC(162.06Â±500ppm)	3403416	733	918	39.7529 min, 4.933 s	0.159	826
Benzenepropanol, 4-hydroxy-3-methoxy-	1.09	137.05	XIC(137.05Â±500ppm)	11400698	1150	2158	40.3363 min, 4.175 s	0.128	884
Ethanone, 1-(3,4,5-trimethylphenyl)-	0.87	147.04	XIC(147.04Â±500ppm)	1182975	141	273	40.3363 min, 4.648 s	0.131	730
trans Cinnamic acid amide	1.27	103.05	XIC(103.05Â±500ppm)	489743	160	112	40.3363 min, 5.379 s	0.17	806
1(2H)-Acenaphthylenone	1.19	140.05	XIC(140.05Â±500ppm)	4071003	930	1122	40.4196 min, 5.140 s	0.169	861
2-Naphthalenol, 3-methoxy-	1.55	131.04	XIC(131.04Â±500ppm)	1073515	376	262	40.6696 min, 4.556 s	0.159	845
2(3H)-Naphthalenone, 4,4a,5,6-tetrahydro-7-methyl-	1.27	162.06	XIC(162.06Â±500ppm)	1540991	320	464	40.8363 min, 4.867 s	0.161	710
Tridecanoic acid	1.16	60.03	XIC(60.03Â±500ppm)	1010143	220	198	40.9197 min, 2.356 s	0.071	826
7-Hydroxy-1-indanone	1.12	148.04	XIC(148.04Â±500ppm)	1447378	1020	452	41.0863 min, 5.173 s	0.168	829
1,6:2,3-Dianhydro-4-O-acetyl-ÃŸ-d-talopyranose	1.48	43.03	XIC(43.03Â±500ppm)	1512548	114	119	41.1697 min, 4.066 s	0.127	711
4-((1E)-3-Hydroxy-1-propenyl)-2-methoxyphenol	0.64	137.05	XIC(137.05Â±500ppm)	777803	173	277	41.1697 min, 4.330 s	0.127	724
2-Piperidinone, N-[4-bromo-n-butyl]-	2.62	57.08	XIC(57.08Â±500ppm)	524607	110	150	41.3364 min, 2.216 s	0.083	783
2-Allyl-1,4-dimethoxy-3-methyl-benzene	1.14	192.07	XIC(192.07Â±500ppm)	3746141	796	1383	41.3364 min, 4.334 s	0.139	731
n-Nonadecanol-1	1.13	43.07	XIC(43.07Â±500ppm)	1513257	213	119	41.4197 min, 2.301 s	0.07	871
Methyl 3-(4-hydroxy-3-methoxyphenyl)propanoate	1.11	137.05	XIC(137.05Â±500ppm)	3940924	444	1020	41.503 min, 3.923 s	0.124	791
Ethanone, 1-(3,4,5-trimethoxyphenyl)-	1.36	195.06	XIC(195.06Â±500ppm)	1331214	779	663	41.5864 min, 4.114 s	0.137	808
a-Bisabolol	1.39	43.03	XIC(43.03Â±500ppm)	354383	102	39	41.6697 min, 2.748 s	0.094	883
2-Methylhexadec-1-ene	1.1	56.07	XIC(56.07Â±500ppm)	2078957	465	319	41.7531 min, 1.940 s	0.06	886
9H-Fluorene, 9-methyl-	1.86	165.06	XIC(165.06Â±500ppm)	558430	166	248	41.8364 min, 3.993 s	0.141	845
9H-Fluorene, 4-methyl-	1.17	165.06	XIC(165.06Â±500ppm)	658211	254	269	41.9197 min, 4.048 s	0.138	867
2H-1-Benzopyran-2-one, 8-methoxy-	1.59	176.04	XIC(176.04Â±500ppm)	957484	101	262	41.9197 min, 5.333 s	0.185	837
ÃŸ-D-Glucopyranose, 1,6-anhydro-, triacetate	1.16	43.03	XIC(43.03Â±500ppm)	6062405	783	467	42.0864 min, 4.160 s	0.149	734
trans-Dodec-5-enal	0.51	41.05	XIC(41.05Â±500ppm)	535217	155	52	42.1698 min, 2.422 s	0.07	852
3-Hydroxybiphenyl	1.2	170.06	XIC(170.06Â±500ppm)	3980017	1261	1277	42.2531 min, 4.364 s	0.135	815
1,4-diazabicyclo[4.3.0]nonan-2,5-dione, 3-methyl	1.08	70.07	XIC(70.07Â±500ppm)	9617410	1156	1344	42.2531 min, 6.345 s	0.206	912
Cyclooctane, 1,2-diethyl-	2.19	55.07	XIC(55.07Â±500ppm)	745746	130	112	42.4198 min, 1.915 s	0.156	782
1-Cyclopropene-1-pentanol, a,e,e,2-tetramethyl-3-(1-methylethenyl)-	1.1	135.07	XIC(135.07Â±500ppm)	1150679	381	330	42.4198 min, 2.918 s	0.103	724
p-Hydroxybiphenyl	1.12	170.06	XIC(170.06Â±500ppm)	4235168	1035	1399	42.5865 min, 4.431 s	0.137	872
1-Naphthol, 6,7-dimethyl-	1.14	172.08	XIC(172.08Â±500ppm)	3682829	349	953	42.6698 min, 4.157 s	0.141	777
1,4-Methanonaphthalene-5,8-diol, 1,2,3,4-tetrahydro-	1.18	147.04	XIC(147.04Â±500ppm)	1247211	178	402	42.7531 min, 4.375 s	0.145	701
9H-Fluorene, 9-methylene-	1.07	178.07	XIC(178.07Â±500ppm)	1021732	261	364	42.8365 min, 4.416 s	0.138	871
1-Decanol, 2-octyl-	2.39	57.08	XIC(57.08Â±500ppm)	2730595	274	332	42.9198 min, 1.856 s	0.12	808
methyl 4-methylnaphthalen-1-yl ether	1.06	157.06	XIC(157.06Â±500ppm)	1500201	230	477	42.9198 min, 4.282 s	0.176	715
3,4,5-trimethoxyphenyl-2-propanone	1.21	181.08	XIC(181.08Â±500ppm)	1322204	564	525	43.0032 min, 4.051 s	0.14	793
p-n-Butylacetophenone	0.79	161.05	XIC(161.05Â±500ppm)	715599	128	249	43.0032 min, 4.380 s	0.14	737
Dihydrofuranno(3,2-f)coumaran	1.16	162.06	XIC(162.06Â±500ppm)	1095973	218	408	43.0032 min, 4.762 s	0.143	747
9H-Fluoren-9-one	1.51	180.05	XIC(180.05Â±500ppm)	22076377	3065	2837	43.2532 min, 4.753 s	0.16	946
2-Hexadecene, 3,7,11,15-tetramethyl-, [R-[R*,R*-(E)]]-	1.1	56.07	XIC(56.07Â±500ppm)	5552499	1743	825	43.3365 min, 1.853 s	0.063	857
Naphtho[2,1-b]furan, 1,2-dimethyl-	1.12	196.08	XIC(196.08Â±500ppm)	674243	282	265	43.4199 min, 3.718 s	0.117	739
(E)-4-(3-Hydroxyprop-1-en-1-yl)-2-methoxyphenol	1.12	137.05	XIC(137.05Â±500ppm)	2258519	302	563	43.5032 min, 4.368 s	0.138	720
Isoquinoline, 1,2,3,4-tetrahydro-1-[2-nitrobenzyl]-6,7-dimethoxy-	1.31	192.07	XIC(192.07Â±500ppm)	3699436	454	1052	43.5865 min, 4.633 s	0.152	714
Pyrrolo[1,2-a]pyrazine-1,4-dione, hexahydro-	0.81	41.05	XIC(41.05Â±500ppm)	6395341	1469	274	43.8366 min, 2.081 s	0.236	873
Decane, 1-iodo-	4.24	57.08	XIC(57.08Â±500ppm)	2441737	605	440	43.9199 min, 1.821 s	0.073	791
2-Propenoic acid, 3-(4-hydroxyphenyl)-, methyl ester	1.16	147.04	XIC(147.04Â±500ppm)	1559805	287	442	43.9199 min, 4.205 s	0.128	822
Phenol, pentachloro-	1.15	265.83	XIC(265.85Â±500ppm)	678932	434	645	44.0032 min, 3.921 s	0.118	897
Cyclo-(glycyl-l-leucyl)	1.14	114.03	XIC(114.03Â±500ppm)	1533699	283	494	44.0866 min, 5.497 s	0.16	828
2-Dibenzofuranol	1.16	184.04	XIC(184.04Â±500ppm)	1986369	393	884	44.1699 min, 4.456 s	0.137	843
6-Ethyl-4,7-dimethyl-2,3-benzofurandione	1.12	176.07	XIC(176.07Â±500ppm)	1027534	303	410	44.1699 min, 4.657 s	0.154	720
Benzofuran, 3-methyl-2-(1-methylethenyl)-	0.55	172.08	XIC(172.08Â±500ppm)	733122	156	309	44.2533 min, 4.284 s	0.13	720
6-Methoxy-4-methylcoumarin	1.44	190.05	XIC(190.05Â±500ppm)	602124	137	271	44.2533 min, 4.747 s	0.14	786
Naphthalene, 2,3-dimethoxy-	1.16	188.07	XIC(188.07Â±500ppm)	643535	186	75	44.5866 min, 4.166 s	0.129	706
3-Allyl-6-methoxyphenol	1.02	137.05	XIC(137.05Â±500ppm)	1080001	286	327	44.7533 min, 3.627 s	0.111	712
Syringylacetone	1.07	167.06	XIC(167.06Â±500ppm)	116850140	3297	8143	44.7533 min, 4.318 s	0.139	851
Benzoic acid, 4-hydroxy-3,5-dimethoxy-, hydrazide	1.15	181.04	XIC(181.04Â±500ppm)	5271354	485	1367	44.8366 min, 4.199 s	0.132	822
2-Methyl-1-undecanol	1.47	43.07	XIC(43.07Â±500ppm)	547459	117	74	45.0033 min, 2.226 s	0.078	825
Phthalic acid, ethyl pentyl ester	1.24	149.02	XIC(149.02Â±500ppm)	1525425	408	556	45.0867 min, 3.417 s	0.113	708
5-Undecene, 3-methyl-, (Z)-	0.49	70.08	XIC(70.08Â±500ppm)	1198016	286	355	45.3367 min, 1.905 s	0.06	822
4-Cyclohepta-2,4,6-trienyl-phenol	1.48	184.08	XIC(184.08Â±500ppm)	1291264	411	527	45.3367 min, 4.157 s	0.137	773
Tetradecanoic acid, 12-methyl-, methyl ester, (S)-	1.05	74.04	XIC(74.04Â±500ppm)	266052	112	97	45.42 min, 2.156 s	0.067	752
Undecanoic acid, ethyl ester	1.14	88.05	XIC(88.05Â±500ppm)	246750	189	174	45.5867 min, 2.149 s	0.067	776
4-Methyl-7-ethoxycoumarin	1.1	147.04	XIC(147.04Â±500ppm)	4217752	1206	775	45.67 min, 3.356 s	0.104	732
4-Benzylphenol, acetate	1.29	184.08	XIC(184.08Â±500ppm)	1122964	275	416	45.67 min, 4.062 s	0.126	703
1H-Indole-3-acetonitrile	1.37	155.05	XIC(155.05Â±500ppm)	747572	312	277	45.7534 min, 5.776 s	0.184	844
Caryophyllene oxide	1.03	55.06	XIC(55.06Â±500ppm)	1041763	265	144	45.9201 min, 3.479 s	0.119	794
Cyclo(L-prolyl-L-valine)	1.1	70.07	XIC(70.07Â±500ppm)	7832419	1014	855	45.9201 min, 5.172 s	0.164	921
Benzen, 2-acetate-1,3-dimethoxy-5-(1-propenyl)-	1.34	194.09	XIC(194.09Â±500ppm)	1873532	449	746	46.1701 min, 3.716 s	0.139	757
Anthracene, 9-(4-bromobutyl)-9,10-dihydro-	1	179.08	XIC(179.08Â±500ppm)	734638	131	252	46.1701 min, 3.769 s	0.148	737
Anthrone	1.59	194.06	XIC(194.06Â±500ppm)	2164257	322	629	46.1701 min, 4.377 s	0.143	876
Benzo[f]isoquinoline	2.3	179.06	XIC(179.06Â±500ppm)	3961825	396	532	46.1701 min, 4.926 s	0.215	870
cis-Sinapyl alcohol	1.17	167.07	XIC(167.07Â±500ppm)	3908522	315	922	46.3368 min, 4.286 s	0.123	749
1,4,5,7-Tetramethyl-furo[3,4-d]pyridazine	1.25	176.07	XIC(176.07Â±500ppm)	893336	200	322	46.4201 min, 4.599 s	0.146	741
Phthalic acid, isobutyl propyl ester	1.22	149.02	XIC(149.02Â±500ppm)	1868839	893	715	46.5034 min, 3.228 s	0.111	851
1-Propanone, 1-(4-hydroxy-3,5-dimethoxyphenyl)-	1.25	181.04	XIC(181.04Â±500ppm)	32231636	2331	4432	46.5868 min, 4.057 s	0.15	847
Pentadecanoic acid, methyl ester	1.05	74.04	XIC(74.04Â±500ppm)	605141	192	200	46.6701 min, 2.160 s	0.063	732
Tyrosol, acetate	1.04	120.05	XIC(120.05Â±500ppm)	2039758	381	476	46.6701 min, 4.927 s	0.156	792
9H-Carbazole-9-methanol	1.15	167.06	XIC(167.08Â±500ppm)	15184668	887	2486	46.7535 min, 4.989 s	0.147	917
Docosane	2.04	57.08	XIC(57.08Â±500ppm)	2187086	476	432	46.9201 min, 1.804 s	0.069	777
2-Propenoic acid, 3-(4-hydroxy-3-methoxyphenyl)-, methyl ester	1.13	208.06	XIC(208.06Â±500ppm)	1327431	234	449	47.0035 min, 3.923 s	0.124	865
Neophytadiene	1.04	68.07	XIC(68.07Â±500ppm)	2966611	1028	699	47.0868 min, 1.898 s	0.06	920
Caffeine	1.76	194.07	XIC(194.07Â±500ppm)	1666409	201	552	47.0868 min, 5.249 s	0.142	778
2-Azafluorene	1.1	167.06	XIC(167.06Â±500ppm)	712494	163	235	47.2535 min, 5.138 s	0.146	723
4-Hydroxy-9-fluorenone	1.7	196.04	XIC(196.04Â±500ppm)	1898532	406	555	47.4202 min, 4.684 s	0.154	791
1H-Indene, 1-(phenylmethylene)-	1.2	204.08	XIC(204.08Â±500ppm)	2358391	878	1113	47.5035 min, 4.177 s	0.14	928
1,2-Acenaphthylenedione	1.04	126.04	XIC(126.04Â±500ppm)	2019168	213	498	47.8369 min, 5.520 s	0.157	917
2,3-Dihydro-1-oxo-1H-phenalene	1.67	153.07	XIC(153.07Â±500ppm)	734116	256	179	47.9202 min, 5.117 s	0.158	764
1,2-Benzenedicarboxylic acid, dipropyl ester	0.6	149.01	XIC(149.01Â±500ppm)	3488087	187	605	48.0869 min, 3.225 s	0.082	881
4-Phenoxybenzaldehyde	0.93	198.06	XIC(198.06Â±500ppm)	422739	116	200	48.0869 min, 4.122 s	0.119	726
(3S,3aS,6R,7R,9aS)-1,1,7-Trimethyldecahydro-3a,7-methanocyclopenta[8]annulene-3,6-diol	0.83	41.05	XIC(41.05Â±500ppm)	1492097	104	71	48.1702 min, 3.664 s	0.119	831
2-Fluorenecarboxaldehyde	1.37	165.06	XIC(165.06Â±500ppm)	1846611	426	475	48.3369 min, 4.523 s	0.152	874
[1,1'-Biphenyl]-2,2'-diol	1.29	157.06	XIC(157.06Â±500ppm)	707344	322	255	48.4203 min, 5.474 s	0.173	721
3,7,11,15-Tetramethyl-2-hexadecen-1-ol	1.13	81.07	XIC(81.07Â±500ppm)	1241126	494	265	48.5036 min, 1.911 s	0.062	916
Phenanthrene, 2-methyl-	1.27	192.08	XIC(192.08Â±500ppm)	6747584	1332	1843	48.5869 min, 4.173 s	0.135	908
1H-Phenalen-1-one	1.21	152.06	XIC(152.06Â±500ppm)	25786515	2568	2897	48.6703 min, 5.440 s	0.173	912
Phthalic acid, 2-methylbutyl propyl ester	1.15	149.02	XIC(149.02Â±500ppm)	1097178	485	426	48.7536 min, 3.074 s	0.1	755
Phenanthrene, 1-methyl-	1.32	192.08	XIC(192.08Â±500ppm)	9271497	2959	2356	48.7536 min, 4.231 s	0.136	915
5-(3-Hydroxypropyl)-2,3-dimethoxyphenol	1.1	168.07	XIC(168.07Â±500ppm)	7960799	1163	1688	48.837 min, 4.061 s	0.123	848
Anthracene, 2-methyl-	1.29	192.08	XIC(192.08Â±500ppm)	2819988	583	884	49.0036 min, 4.190 s	0.128	891
2-Hydroxyfluorene	1.13	182.06	XIC(182.06Â±500ppm)	1625495	393	508	49.0036 min, 4.546 s	0.138	793
Hexadecanenitrile	1.06	43.07	XIC(43.07Â±500ppm)	2111490	405	195	49.087 min, 2.378 s	0.071	902
3-Isobutyl-4,5-dimethyl-3H-isobenzofuran-1-one	1.1	161.05	XIC(161.05Â±500ppm)	2327308	1141	789	49.087 min, 3.207 s	0.096	754
Pyrrolo[1,2-a]pyrazine-1,4-dione, hexahydro-3-(2-methylpropyl)-	1.1	70.07	XIC(70.07Â±500ppm)	5068146	1479	669	49.1703 min, 4.733 s	0.152	820
2-Decylfuran	1.06	81.03	XIC(81.03Â±500ppm)	1025852	251	313	49.2537 min, 2.127 s	0.065	787
4H-Cyclopenta[def]phenanthrene	1.24	190.07	XIC(190.07Â±500ppm)	9981435	1618	2065	49.2537 min, 4.507 s	0.147	879
4aH-carbazole, 6-methyl-	1.2	181.08	XIC(181.08Â±500ppm)	2200882	499	683	49.2537 min, 4.533 s	0.143	870
Hexadecanal, 2-methyl-	1.08	58.05	XIC(58.05Â±500ppm)	1897682	701	552	49.587 min, 2.019 s	0.063	814
3-methoxy-4-hydroxy-methyl-nitrostyrene	1.49	41.04	XIC(41.04Â±500ppm)	683206	154	32	49.587 min, 4.090 s	0.137	743
Phytol	1.59	43.07	XIC(43.07Â±500ppm)	5603632	735	330	49.7537 min, 2.095 s	0.07	806
Norharmane, N-methyl-	1.43	182.07	XIC(182.07Â±500ppm)	2387762	763	399	49.7537 min, 5.060 s	0.164	861
5,10-Diethoxy-2,3,7,8-tetrahydro-1H,6H-dipyrrolo[1,2-a:1',2'-d]pyrazine	1.52	70.07	XIC(70.07Â±500ppm)	42379970	4108	2953	50.0037 min, 5.802 s	0.186	838
Benzeneacetic acid, 2-propenyl ester	1.1	91.05	XIC(91.05Â±500ppm)	1717713	238	209	50.0871 min, 5.240 s	0.155	750
2-Pentene, (Z)-	3.38	55.07	XIC(55.07Â±500ppm)	31401900	1620	1456	50.2537 min, 2.937 s	0.209	726
9H-Carbazole, 9-methyl-	1.24	181.08	XIC(181.08Â±500ppm)	1581010	525	502	50.4204 min, 4.570 s	0.146	885
2-Hydroxy-5-methoxybenzaldehyde, 2-methylpropyl ether	1.14	152.04	XIC(152.04Â±500ppm)	1761829	603	551	50.5038 min, 3.226 s	0.096	711
1-Hexadecen-3-ol, 3,5,11,15-tetramethyl-	1.01	71.05	XIC(71.05Â±500ppm)	1268498	272	454	50.6704 min, 1.965 s	0.062	864
9,10-Anthracenedione	1.29	152.06	XIC(152.06Â±500ppm)	3780573	485	598	50.9205 min, 4.860 s	0.164	887
9H-Pyrido[3,4-b]indole	1.35	168.06	XIC(168.06Â±500ppm)	1494341	351	459	51.1705 min, 5.381 s	0.174	843
1H-1,2,3-Triazole	1.06	69.04	XIC(69.04Â±500ppm)	3826666	543	660	51.5038 min, 2.152 s	0.067	771
Phenanthrene, 4,5-dimethyl-	1.19	191.07	XIC(191.07Â±500ppm)	625416	118	219	51.5872 min, 3.885 s	0.117	759
trans-Sinapaldehyde	1.09	208.06	XIC(208.06Â±500ppm)	13205527	1406	2773	51.5872 min, 4.199 s	0.131	866
Cannabichromene	1.13	231.13	XIC(231.13Â±500ppm)	1815476	1218	1108	51.6705 min, 3.081 s	0.097	770
2-Pentene, (E)-	4.26	55.07	XIC(55.07Â±500ppm)	67089568	987	2085	51.7539 min, 2.935 s	0.151	747
Benzene, tridecyl-	1.18	92.06	XIC(92.06Â±500ppm)	695243	241	187	51.8372 min, 2.233 s	0.067	900
Phthalic acid, di(2-methylbutyl) ester	1.2	149.02	XIC(149.02Â±500ppm)	3867302	944	810	52.0039 min, 2.824 s	0.101	806
Pyridine, 3,4-diphenyl-	1.47	231.09	XIC(231.09Â±500ppm)	488334	225	281	52.0039 min, 4.018 s	0.142	759
Anthracene, 9-ethyl-	1.63	191.08	XIC(191.08Â±500ppm)	1236881	262	478	52.0872 min, 3.962 s	0.181	706
Fluoranthene	0.36	202.07	XIC(202.07Â±500ppm)	591681	125	282	52.0872 min, 4.275 s	0.121	850
Phenanthrene, 2,7-dimethyl-	3.47	206.1	XIC(206.10Â±500ppm)	586483	227	285	52.1706 min, 3.841 s	0.142	826
Diamyl phthalate	1.18	149.02	XIC(149.02Â±500ppm)	27388703	4081	4808	52.4206 min, 2.793 s	0.097	804
Phenanthrene, 1,7-dimethyl-	1.77	206.1	XIC(206.10Â±500ppm)	1513661	406	540	52.4206 min, 3.888 s	0.125	856
Cyclopropane, 1,2-dimethyl-, cis-	3.3	55.07	XIC(55.07Â±500ppm)	6243215	152	453	52.5039 min, 2.810 s	0.098	751
Naphthalic anhydride	1.26	126.04	XIC(126.04Â±500ppm)	5507996	1881	1138	52.9206 min, 5.510 s	0.175	941
Phenanthrene, 2,3-dimethyl-	1.39	206.1	XIC(206.10Â±500ppm)	3727562	815	973	53.004 min, 3.955 s	0.134	846
Naphthalene, 1,8-di-1-propynyl-	1.26	204.08	XIC(204.08Â±500ppm)	1272228	225	476	53.004 min, 4.198 s	0.134	784
Heptadecanoic acid, methyl ester	1.13	74.04	XIC(74.04Â±500ppm)	1061705	208	263	53.0873 min, 2.056 s	0.06	849
Cannabispiran	1.11	176.08	XIC(176.08Â±500ppm)	15442310	2283	1977	53.1706 min, 3.979 s	0.124	723
Cyclopenta(def)phenanthrenone	1.47	204.05	XIC(204.05Â±500ppm)	14580507	1888	1842	53.1706 min, 4.809 s	0.158	899
Tricyclo[8.2.2.2(4,7)]hexadeca-2,4,6,8,10,12,13,15-octaene	1.49	204.08	XIC(204.08Â±500ppm)	1375789	154	385	53.504 min, 4.233 s	0.131	767
1H-inden-1-one, 2-(2-furanylmethylene)-2,3-dihydro-	1.53	210.06	XIC(210.06Â±500ppm)	1231680	252	481	54.2541 min, 4.442 s	0.184	746
9-(Cyanomethylene)fluorene	1.36	203.06	XIC(203.06Â±500ppm)	892944	244	282	54.2541 min, 4.728 s	0.153	814
2-((Pent-4-enyloxy)carbonyl)benzoic acid	1.14	149.02	XIC(149.02Â±500ppm)	6095713	1332	1380	54.3374 min, 3.244 s	0.105	771
1,1'-Biphenyl, 5-hydroxy-3,4'-dimethoxy-	1.15	230.09	XIC(230.09Â±500ppm)	2251264	666	1210	54.4207 min, 3.967 s	0.121	716
4H-Benz[de]anthracene, 5,6-dihydro-	1.88	218.1	XIC(218.10Â±500ppm)	984143	381	447	54.5041 min, 3.819 s	0.128	779
Allyl undecanoate	2.64	41.05	XIC(41.05Â±500ppm)	866949	199	100	54.6708 min, 2.043 s	0.067	786
3,6-Dibutyl-2,3-dihydro-1H-inden-1-one	1.14	187.07	XIC(187.07Â±500ppm)	7155478	1190	1921	54.6708 min, 4.328 s	0.136	705
Naphthalene, 2-(phenylmethyl)-	1.81	218.1	XIC(218.10Â±500ppm)	863903	290	418	54.7541 min, 3.811 s	0.156	724
Acenaphtho(1,2-b)pyridine	1.62	203.06	XIC(203.06Â±500ppm)	847968	214	277	54.8374 min, 4.842 s	0.159	877
9-Anthracenecarbonitrile	1.83	203.06	XIC(203.06Â±500ppm)	2809002	373	653	55.0041 min, 4.649 s	0.167	843
Phthalic acid, bis(2-pentyl) ester	1.14	149.02	XIC(149.02Â±500ppm)	3342609	696	1078	55.0875 min, 2.674 s	0.089	834
9,12-Octadecadienoic acid, methyl ester	1.07	67.06	XIC(67.06Â±500ppm)	2782076	448	414	55.1708 min, 2.208 s	0.067	905
Pyrene	1.53	202.06	XIC(202.08Â±500ppm)	170427806	7042	6629	55.2541 min, 4.717 s	0.159	936
Octadecanenitrile	0.32	43.07	XIC(43.07Â±500ppm)	1313059	158	125	55.5042 min, 2.230 s	0.067	867
Benzo[b]naphtho[2,3-d]furan	1.68	218.06	XIC(218.06Â±500ppm)	17045373	965	2216	55.5042 min, 4.187 s	0.139	874
Hexacosylamine, N,N-dimethyl-	1.08	58.08	XIC(58.08Â±500ppm)	6271122	2143	1602	55.5875 min, 1.830 s	0.054	895
(4-Acetylphenyl)phenylmethane	1.04	195.07	XIC(195.07Â±500ppm)	559206	114	238	55.7542 min, 3.998 s	0.137	707
Phthalic acid, butyl pent-4-enyl ester	1.11	149.02	XIC(149.02Â±500ppm)	10938900	2303	2479	55.8375 min, 3.244 s	0.103	808
Phenanthrene-9-carboxaldehyde	1.36	206.07	XIC(206.07Â±500ppm)	977560	308	321	55.8375 min, 4.746 s	0.172	848
1-Phenanthrenol	1.08	165.07	XIC(165.07Â±500ppm)	1721549	168	307	55.8375 min, 4.785 s	0.139	741
9,12-Octadecadienoic acid (Z,Z)-	1.08	67.06	XIC(67.06Â±500ppm)	20494172	1889	1377	56.2542 min, 2.298 s	0.07	920
17-Octadecynoic acid	1.25	55.06	XIC(55.06Â±500ppm)	1671276	206	150	56.2542 min, 2.785 s	0.089	797
Cannabidivarol	1.14	203.1	XIC(203.10Â±500ppm)	2224749	751	718	56.2542 min, 3.234 s	0.106	755
Phenanthrene, 2,3,5-trimethyl-	1.65	220.12	XIC(220.12Â±500ppm)	454685	182	237	56.3376 min, 3.670 s	0.144	759
trans-13-Octadecenoic acid	1.92	55.07	XIC(55.07Â±500ppm)	19736706	664	1084	56.4209 min, 2.200 s	0.067	891
9,12,15-Octadecatrienoic acid, (Z,Z,Z)-	0.32	79.05	XIC(79.05Â±500ppm)	1171664	230	224	56.4209 min, 2.389 s	0.073	895
2-((3-Methylbut-3-enyloxy)carbonyl)benzoic acid	1.1	149.02	XIC(149.02Â±500ppm)	2999243	927	959	56.5042 min, 3.087 s	0.098	741
Naphtho(2,1,8-def)quinoline	0.51	203.06	XIC(203.06Â±500ppm)	2132032	144	420	56.5042 min, 5.005 s	0.143	869
1-Hexadecyn-3-ol, 3,7,11,15-tetramethyl-	2.37	84.05	XIC(84.05Â±500ppm)	2493122	342	870	56.5876 min, 2.094 s	0.065	762
(Z)-18-Octadec-9-enolide	1.17	55.07	XIC(55.07Â±500ppm)	4954873	1111	422	56.5876 min, 2.793 s	0.093	907
m-Terphenyl	1.6	230.1	XIC(230.10Â±500ppm)	702163	282	360	56.5876 min, 3.736 s	0.117	795
10(E),12(Z)-Conjugated linoleic acid	1.12	67.06	XIC(67.06Â±500ppm)	2756325	238	320	56.6709 min, 2.246 s	0.101	745
4,9(11)-Androstadiene-3,17-dione	1.14	284.17	XIC(284.17Â±500ppm)	495530	367	505	56.6709 min, 3.071 s	0.094	728
9-Octadecenal	0.61	43.06	XIC(43.06Â±500ppm)	3123704	738	231	56.9209 min, 2.214 s	0.067	750
7-Nonenamide	1.01	59.05	XIC(59.05Â±500ppm)	1676043	569	521	56.9209 min, 2.747 s	0.084	743
3,4,5-Trimethoxy-B-Nitrostyrene	2.72	41.04	XIC(41.04Â±500ppm)	4887732	373	218	56.9209 min, 3.836 s	0.17	748
6ÃŸBicyclo[4.3.0]nonane, 5ÃŸ-iodomethyl-1ÃŸ-isopropenyl-4a,5a-dimethyl-,	1.7	41.05	XIC(41.05Â±500ppm)	470213	167	38	57.0876 min, 3.079 s	0.108	759
Phthalic acid, dodecyl pentyl ester	1.05	149.02	XIC(149.02Â±500ppm)	736584	272	363	57.2543 min, 2.680 s	0.084	774
1-Hydroxypyrene	1.17	218.06	XIC(218.06Â±500ppm)	1229917	184	410	57.2543 min, 4.415 s	0.158	774
Pyrene, 2-methyl-	1.38	216.08	XIC(216.08Â±500ppm)	7139249	827	1489	57.3376 min, 4.140 s	0.14	889
1H-Trindene, 2,3,4,5,6,7,8,9-octahydro-1,1,4,4,7,7-hexamethyl-	1.11	267.13	XIC(267.13Â±500ppm)	3838168	1374	1995	57.421 min, 3.219 s	0.102	766
Benzo[c]phenanthrene	0.63	228.08	XIC(228.08Â±500ppm)	593152	126	311	57.5043 min, 4.215 s	0.123	878
1,13-Tetradecadiene	0.58	55.07	XIC(55.07Â±500ppm)	1249069	151	202	57.921 min, 1.816 s	0.06	838
Benzene, pentadecyl-	1.15	92.06	XIC(92.06Â±500ppm)	835783	248	269	58.0877 min, 2.126 s	0.064	834
2H-Phenanthro[9,10-b]pyran	1.46	232.07	XIC(232.07Â±500ppm)	568075	151	371	58.2544 min, 3.861 s	0.116	738
Retinal, 9-cis-	1.06	165.08	XIC(165.08Â±500ppm)	1844434	738	520	58.3377 min, 3.165 s	0.102	726
6,7-Dimethoxy-4-ethylcoumarin	1.05	234.08	XIC(234.08Â±500ppm)	729297	267	293	58.3377 min, 4.479 s	0.132	702
7H-Benzo[c]fluorene	1.75	216.08	XIC(216.08Â±500ppm)	564422	171	213	58.4211 min, 4.291 s	0.152	840
Chrysene	1.17	228.08	XIC(228.08Â±500ppm)	1044499	316	487	58.5877 min, 4.214 s	0.138	893
N-Methyldodecanamide	1.09	73.05	XIC(73.05Â±500ppm)	3364515	566	651	58.6711 min, 2.443 s	0.071	807
Eicosanal-	0.46	43.07	XIC(43.07Â±500ppm)	2554292	578	350	58.9211 min, 2.011 s	0.058	921
8-Heptadecyne, 1-bromo-	2.21	41.05	XIC(41.05Â±500ppm)	617936	137	59	59.5045 min, 2.141 s	0.075	765
Triphenylene	1.27	228.08	XIC(228.08Â±500ppm)	1229782	364	563	59.5045 min, 4.108 s	0.122	901
Hexadecanoic acid, 2-hydroxy-1-(hydroxymethyl)ethyl ester	1.2	43.05	XIC(43.05Â±500ppm)	3726139	563	279	59.6712 min, 2.204 s	0.066	775
N,N-Dimethyldodecanamide	1.06	87.06	XIC(87.06Â±500ppm)	1208832	421	583	59.7545 min, 2.318 s	0.067	821
Anthra[1,9-cd]pyrazol-6(2H)-one	1.48	220.04	XIC(220.04Â±500ppm)	2031492	801	666	60.1712 min, 4.985 s	0.165	767
.DELTA.8-Tetrahydrocannabinol	1.07	231.13	XIC(231.13Â±500ppm)	5780391	1836	1636	60.3379 min, 2.944 s	0.093	834
5,6-Dihydrochrysene	2.17	230.1	XIC(230.10Â±500ppm)	766054	267	330	60.8379 min, 3.843 s	0.131	748
(E)-3,3'-Dimethoxy-4,4'-dihydroxystilbene	1	272.1	XIC(272.10Â±500ppm)	389874	195	343	60.8379 min, 3.972 s	0.111	703
Glycidyl palmitate	0.17	57.06	XIC(57.06Â±500ppm)	662879	166	160	60.9213 min, 2.207 s	0.073	792
Nonadecanenitrile	1.04	57.07	XIC(57.07Â±500ppm)	455761	128	93	61.338 min, 2.123 s	0.062	895
13-Octadecenal, (Z)-	1.18	83.04	XIC(83.04Â±500ppm)	5981957	1377	968	61.338 min, 2.428 s	0.074	782
4-(2-Methoxyethyl)phenol	1.12	107.04	XIC(107.04Â±500ppm)	1747030	461	454	61.338 min, 3.833 s	0.113	742
d9-Tetrahydrocannabivarin	1.06	203.1	XIC(203.10Â±500ppm)	18970541	3061	3187	61.4213 min, 3.160 s	0.103	889
Pyrrolo[1,2-a]pyrazine-1,4-dione, hexahydro-3-(phenylmethyl)-	1.1	125.07	XIC(125.07Â±500ppm)	4716459	443	1501	61.4213 min, 5.177 s	0.148	843
Pyrene, 1,3-dimethyl-	1.25	230.1	XIC(230.10Â±500ppm)	2919088	273	830	61.5046 min, 3.966 s	0.137	752
2-Propanone, 1-hydroxy-3-(4-hydroxy-3-methoxyphenyl)-	1.05	137.05	XIC(137.05Â±500ppm)	13128214	1873	3756	61.588 min, 3.848 s	0.116	762
Eicosanoic acid, methyl ester	1.05	74.04	XIC(74.04Â±500ppm)	2957045	1193	813	61.838 min, 1.932 s	0.056	906
Cannabidiol	1.11	231.13	XIC(231.13Â±500ppm)	5879883	2019	1621	61.9213 min, 2.989 s	0.095	835
Cyclopentadecanone	0.69	55.06	XIC(55.06Â±500ppm)	1418622	229	145	61.9213 min, 3.090 s	0.101	725
11H-Benzo[a]fluoren-11-one	1.3	230.06	XIC(230.06Â±500ppm)	3944069	891	1038	62.0047 min, 4.507 s	0.143	865
1,3-Dimethyl-(3,7-dimethyloctyl)cyclohexane	1.05	111.04	XIC(111.04Â±500ppm)	285638	136	115	62.088 min, 2.406 s	0.071	720
Cyclobutanecarboxylic acid, undec-2-enyl ester	1.04	83.03	XIC(83.03Â±500ppm)	1790994	546	548	62.2547 min, 2.391 s	0.071	748
phenol, 4,4'-[dithiobis(methylene)]bis[2-methoxy-	0.98	137.05	XIC(137.05Â±500ppm)	6605452	899	1840	62.2547 min, 3.796 s	0.111	740
1,10-Decanediol	1.07	97.05	XIC(97.05Â±500ppm)	605936	125	170	62.6714 min, 2.352 s	0.069	711
2-Methyltetracosane	2.51	57.08	XIC(57.08Â±500ppm)	1447843	350	256	62.7547 min, 1.666 s	0.092	859
Eicosanoic acid	0.15	43.07	XIC(43.07Â±500ppm)	1184415	236	111	62.7547 min, 2.008 s	0.062	848
Benzo[ghi]fluoranthene	0.48	226.07	XIC(226.07Â±500ppm)	1296450	249	549	62.7547 min, 4.469 s	0.132	893
7H-Benz[de]anthracen-7-one	1.28	230.06	XIC(230.06Â±500ppm)	1763331	309	520	62.9214 min, 4.516 s	0.143	835
Cannabinol	1.1	295.16	XIC(295.16Â±500ppm)	6977113	2193	3156	63.0881 min, 2.961 s	0.094	809
Cyclododecanemethanol	0.44	55.07	XIC(55.07Â±500ppm)	1023843	171	180	63.4215 min, 1.760 s	0.072	820
Ethisterone	1.11	193.11	XIC(193.11Â±500ppm)	4817969	1411	1171	63.7548 min, 2.929 s	0.092	707
1-Tetracosene	1.76	55.07	XIC(55.07Â±500ppm)	664850	122	119	63.8382 min, 1.733 s	0.054	795
Eicosyl acetate	1.83	85.07	XIC(85.07Â±500ppm)	522656	136	240	64.0048 min, 1.883 s	0.051	788
Naphtho[2,1,8,7-klmn]xanthene	1.22	242.06	XIC(242.06Â±500ppm)	528333	254	253	64.2549 min, 4.205 s	0.128	838
9,12-Octadecadienoyl chloride, (Z,Z)-	1.11	67.06	XIC(67.06Â±500ppm)	1499489	200	197	64.3382 min, 2.293 s	0.068	859
Benz[a]anthracene	1.74	228.08	XIC(228.10Â±500ppm)	27354790	1414	2396	64.5882 min, 4.381 s	0.14	937
Resorcinol, 2-p-mentha-1,8-dien-3-yl-5-pentyl-, (-)-(E)-	0.95	231.13	XIC(231.13Â±500ppm)	8997792	803	1264	64.6716 min, 2.874 s	0.091	844
L-4-Hydroxy-3-methoxyphenylalanine	1.06	137.05	XIC(137.05Â±500ppm)	32049395	2950	5169	64.7549 min, 3.628 s	0.108	731
Oxalic acid, cyclobutyl octadecyl ester	13	43.07	XIC(43.07Â±500ppm)	1115508	212	99	64.8382 min, 1.660 s	0.283	732
Benz[a]anthracene:2	1.94	228.08	XIC(228.10Â±500ppm)	46349886	2490	2134	64.8382 min, 4.508 s	0.153	945
11H-Benzo[a]carbazole	1.36	217.08	XIC(217.08Â±500ppm)	522448	146	206	65.0049 min, 4.637 s	0.127	877
1,3-Benzenediol, 5-pentyl-2-(4,6,6-trimethylbicyclo[3.1.1]hept-3-en-2-yl)-, (1a,2a,5a)-	1.1	231.13	XIC(231.13Â±500ppm)	1802344	842	573	65.2549 min, 2.994 s	0.091	809
Isothiourea, 1-(2-chloro-6-methylphenyl)-2-methyl-3-(1,1-dimethyl-2-propynyl)-	1.14	265.09	XIC(265.09Â±500ppm)	291364	210	187	65.5883 min, 2.790 s	0.082	705
1H-Indene, 1,1'-(1,2-ethanediylidene)bis-	0.93	254.1	XIC(254.10Â±500ppm)	843638	209	377	65.6716 min, 4.136 s	0.146	873
Bis(2-ethylhexyl)hydrogen phosphate	1.04	98.98	XIC(98.98Â±500ppm)	1058549	592	789	65.755 min, 1.910 s	0.062	871
Dronabinol	1.84	231.13	XIC(231.13Â±500ppm)	519536	174	175	65.9217 min, 2.984 s	0.092	733
Benzaldehyde, 2-butoxy-5-(4-methylphenyl)-	1.01	211.07	XIC(211.07Â±500ppm)	1693646	394	522	65.9217 min, 3.144 s	0.091	720
1,1'-Binaphthalene	1.25	254.1	XIC(254.10Â±500ppm)	644337	165	278	65.9217 min, 4.081 s	0.121	856
1,6-Dibenzofurandiol, 5a,6,7,8,9,9a-hexahydro-6-methyl-9-(1-methylethenyl)-3-pentyl-, (5aa,6a,9a,9aa)-	1.12	43.04	XIC(43.04Â±500ppm)	18192413	3872	907	66.005 min, 3.075 s	0.099	762
Chrysene, 5-methyl-	0.71	239.08	XIC(239.08Â±500ppm)	347598	100	152	66.9217 min, 4.261 s	0.196	735
Bisphenol G	1.11	297.18	XIC(297.18Â±500ppm)	8318101	1678	2941	67.0884 min, 2.897 s	0.088	734
Cannabinol, acetate	1.08	337.17	XIC(337.17Â±500ppm)	392996	328	549	67.3384 min, 2.761 s	0.083	838
6H-Benz[de]anthracen-6-one	1.07	202.08	XIC(202.08Â±500ppm)	729096	222	284	67.6718 min, 5.008 s	0.145	855
Chrysene, 1-methyl-	1.36	242.1	XIC(242.10Â±500ppm)	1538269	693	650	67.8385 min, 4.121 s	0.142	928
Cannabinol, TMS derivative	1.13	367.16	XIC(367.16Â±500ppm)	709490	844	1009	67.9218 min, 2.544 s	0.082	809
Benzoic acid, 4-butyl-, 4-cyanophenyl ester	1.1	161.05	XIC(161.05Â±500ppm)	2792262	648	883	68.0052 min, 3.652 s	0.111	790
n-Dodecanoylpyrrolidine	1.08	113.08	XIC(113.08Â±500ppm)	800737	428	375	68.1718 min, 2.413 s	0.07	827
5,12-Naphthacenedione	0.94	258.06	XIC(258.06Â±500ppm)	262531	106	117	68.1718 min, 4.538 s	0.116	812
2,2'-Binaphthalene	1.46	254.1	XIC(254.10Â±500ppm)	1606499	460	628	68.8386 min, 4.021 s	0.125	865
1-Acetoxynonadecane	2.1	43.06	XIC(43.06Â±500ppm)	1160469	234	210	69.0886 min, 1.828 s	0.05	905
Benzene, nonadecyl-	1.1	92.06	XIC(92.06Â±500ppm)	576554	224	157	69.0886 min, 1.971 s	0.056	824
Hexadecanoic acid, 2,3-bis(acetyloxy)propyl ester	1.12	43.04	XIC(43.04Â±500ppm)	3445497	460	286	69.1719 min, 2.164 s	0.066	711
Eicosanenitrile	1.11	57.08	XIC(57.08Â±500ppm)	1022878	272	194	69.2553 min, 1.998 s	0.059	846
Hexadecanoic acid, 2-hydroxy-, methyl ester	0.49	43.07	XIC(43.07Â±500ppm)	532162	178	87	70.2553 min, 1.953 s	0.061	829
Nordazepam, TMS derivative	1	341.01	XIC(341.01Â±500ppm)	922063	407	580	70.3387 min, 6.487 s	0.047	709
1,3,6,10-Cyclotetradecatetraene, 3,7,11-trimethyl-14-(1-methylethyl)-, [S-(E,Z,E,E)]-	1.08	107.08	XIC(107.08Â±500ppm)	1966986	273	404	70.5054 min, 3.205 s	0.098	768
3-(3,4-Dimethoxyphenyl)-7-hydroxychromen-2-one	1.13	298.11	XIC(298.11Â±500ppm)	3555747	1569	1676	70.5054 min, 3.538 s	0.104	757
Allyl nonanoate	0.38	43.07	XIC(43.07Â±500ppm)	568274	157	88	70.7554 min, 1.837 s	0.057	761
9,19-Cyclolanostan-3-ol, acetate, (3ÃŸ)-	0.97	43.07	XIC(43.07Â±500ppm)	409973	174	54	71.2554 min, 2.327 s	0.07	717
Butanoic acid, anhydride	0.97	71.05	XIC(71.05Â±500ppm)	1358166	444	532	71.5888 min, 1.864 s	0.067	719
Benzo(a)pyrene-4,5-dione	1.15	254.06	XIC(254.06Â±500ppm)	571625	201	286	71.7555 min, 4.667 s	0.137	736
Phenol, 4,4'-methylenebis[2,6-dimethoxy-	1.04	320.12	XIC(320.12Â±500ppm)	605090	436	725	71.8388 min, 3.768 s	0.111	754
Tetracosanoic acid, methyl ester	1.08	74.04	XIC(74.04Â±500ppm)	12519338	2317	1957	71.9221 min, 1.821 s	0.054	885
Benzo[k]fluoranthene	1.39	252.09	XIC(252.10Â±500ppm)	12098256	1433	1928	72.2555 min, 4.395 s	0.136	927
Perylene	0.87	252.09	XIC(252.09Â±500ppm)	16059793	1033	1716	72.3388 min, 4.484 s	0.176	929
Allylescaline	1.04	167.06	XIC(167.06Â±500ppm)	3845551	1156	1734	73.0056 min, 3.725 s	0.11	781
9,12-Octadecadien-1-ol, (Z,Z)-	0.68	43.04	XIC(43.04Â±500ppm)	922852	116	112	73.2556 min, 2.260 s	0.085	717
Dinaphtho[1,2-b:1',2'-d]furan	1.22	268.08	XIC(268.08Â±500ppm)	784187	372	337	73.7556 min, 4.224 s	0.137	800
Deoxycubebin	1.09	136.05	XIC(136.05Â±500ppm)	3772720	817	1122	73.839 min, 3.804 s	0.11	878
Benzo[j]fluoranthene	1.25	252.09	XIC(252.11Â±500ppm)	12555734	2713	2004	74.2557 min, 4.678 s	0.14	926
7-Hexadecenal, (Z)-	0.51	43.07	XIC(43.07Â±500ppm)	470391	189	70	74.4223 min, 2.207 s	0.063	745
Ergost-5-en-3-ol, acetate, (3ÃŸ,24R)-	2.57	43.07	XIC(43.07Â±500ppm)	334818	126	47	74.9224 min, 2.308 s	0.07	788
a-Tocospiro B	1.31	43.06	XIC(43.06Â±500ppm)	385593	114	52	75.1724 min, 2.064 s	0.071	724
Stigmastan-6,22-dien, 3,5-dedihydro-	1.1	55.07	XIC(55.07Â±500ppm)	435149	130	66	75.6724 min, 2.272 s	0.071	868
3,4-Divanillyltetrahydrofuran	1.05	137.06	XIC(137.06Â±500ppm)	2530345	526	852	75.7558 min, 3.599 s	0.104	825
17-Noranthiaergostan-1,5,7,9-tetraen, 17-acetyl-	1.16	294.22	XIC(294.22Â±500ppm)	983889	936	655	75.8391 min, 2.784 s	0.088	704
Hexacosanoic acid, methyl ester	1.07	74.04	XIC(74.04Â±500ppm)	7625019	2632	1434	76.5058 min, 1.784 s	0.052	871
d-Tocopherol	1.02	137.06	XIC(137.06Â±500ppm)	4552428	1286	1564	76.6725 min, 2.249 s	0.067	906
5a-Ergost-8(14)-ene	0.74	81.07	XIC(81.07Â±500ppm)	702971	101	188	76.6725 min, 2.332 s	0.071	761
Stigmasta-3,5-diene	1.01	43.07	XIC(43.07Â±500ppm)	2818048	677	225	76.9225 min, 2.270 s	0.07	807
Cholesta-4,6-dien-3-ol, (3ÃŸ)-	0.4	43.07	XIC(43.07Â±500ppm)	1482448	410	146	77.3392 min, 2.438 s	0.073	795
ÃŸ-SITOSTANYL ACETATE	0.68	43.07	XIC(43.07Â±500ppm)	693093	305	106	77.4226 min, 2.279 s	0.082	772
Isoneoergosterol acetate	0.18	55.07	XIC(55.07Â±500ppm)	385266	105	54	77.7559 min, 2.697 s	0.114	757
Cyclopentadecane	2.74	55.07	XIC(55.07Â±500ppm)	840267	134	151	78.006 min, 1.660 s	0.059	783
Retinol, acetate	1.44	55.07	XIC(55.07Â±500ppm)	1940920	272	236	78.006 min, 2.431 s	0.064	748
Heptacosyl acetate	1.13	43.06	XIC(43.06Â±500ppm)	6137291	1404	553	78.1726 min, 1.793 s	0.054	908
Olean-12-en-3-ol, acetate, (3ÃŸ)-	1.14	218.2	XIC(218.20Â±500ppm)	9254709	2386	2230	78.1726 min, 2.651 s	0.081	874
Cholesta-6,22,24-triene, 4,4-dimethyl-	0.53	55.07	XIC(55.07Â±500ppm)	3418038	406	365	78.506 min, 2.490 s	0.075	868
9,19-Cycloergost-24(28)-en-3-ol, 4,14-dimethyl-, acetate, (3ÃŸ,4a,5a)-	0.42	69.08	XIC(69.08Â±500ppm)	3688863	371	434	78.5893 min, 2.529 s	0.076	815
?-Tocopherol	1.05	151.07	XIC(151.07Â±500ppm)	7229858	1909	2084	78.6727 min, 2.343 s	0.07	878
24-Norursa-3,12-diene	1.15	218.2	XIC(218.20Â±500ppm)	15860414	1374	3069	79.0894 min, 2.829 s	0.09	864
Indeno[1,2,3-cd]fluoranthene	1.41	276.09	XIC(276.09Â±500ppm)	374081	236	236	79.5061 min, 4.996 s	0.148	915
ÃŸ-Sitosterol acetate	2.32	43.07	XIC(43.07Â±500ppm)	2031489	672	173	79.5894 min, 2.559 s	0.089	804
Oxirane, [(hexadecyloxy)methyl]-	1.75	43.07	XIC(43.07Â±500ppm)	2068465	189	165	79.6728 min, 1.886 s	0.058	760
Glutinol	0.59	95.08	XIC(95.08Â±500ppm)	729526	148	158	79.8394 min, 2.964 s	0.086	750
2-Nonadecanone	1.04	59.06	XIC(59.06Â±500ppm)	5229375	2583	1727	80.4228 min, 1.969 s	0.059	871
Octacosanoic acid, methyl ester	1.07	74.04	XIC(74.04Â±500ppm)	5664704	1320	917	80.7562 min, 1.963 s	0.058	825
Lupeol, trifluoroacetate	0.96	121.1	XIC(121.10Â±500ppm)	1124255	197	353	80.8395 min, 3.110 s	0.151	784
Naphthalene, 1,2,3,5,6,7,8,8a-octahydro-1,8a-dimethyl-7-(1-methylethenyl)-, [1R-(1a,7ÃŸ,8aa)]-	0.43	55.07	XIC(55.07Â±500ppm)	659216	117	79	81.0062 min, 3.214 s	0.207	737
Benzo[b]triphenylene	1.07	278.1	XIC(278.10Â±500ppm)	656775	141	342	81.2562 min, 5.570 s	0.173	891
Benzo[ghi]perylene	1.22	276.09	XIC(276.10Â±500ppm)	6645970	1358	1576	82.3396 min, 1.589 s	0.198	930
1,6,10,14,18,22-Tetracosahexaen-3-ol, 2,6,10,15,19,23-hexamethyl-, (all-E)-(Â±)-	6.55	55.07	XIC(55.07Â±500ppm)	1168685	108	137	82.3396 min, 3.091 s	0.107	753
Campesterol	1.08	43.07	XIC(43.07Â±500ppm)	8648735	619	552	82.423 min, 3.261 s	0.1	900
Neoergosterol	0.38	55.07	XIC(55.07Â±500ppm)	406555	171	63	82.5897 min, 3.799 s	0.127	778
1,1,6-trimethyl-3-methylene-2-(3,6,9,13-tetramethyl-6-ethenye-10,14-dimethylene-pentadec-4-enyl)cyclohexane	0.31	95.08	XIC(95.08Â±500ppm)	3443364	286	583	82.673 min, 3.581 s	0.108	797
Octatriacontanoic acid, 34,36-dimethyl-, methyl ester	1.12	74.04	XIC(74.04Â±500ppm)	378487	203	108	82.7563 min, 2.140 s	0.06	748
1-Hexacosanol	0.16	57.08	XIC(57.08Â±500ppm)	540857	111	151	82.7563 min, 2.318 s	0.071	740
Stigmasterol	1.1	55.07	XIC(55.07Â±500ppm)	12251120	1203	765	83.0897 min, 3.345 s	0.102	919
1-Decanol, 2-methyl-	2.37	43.06	XIC(43.06Â±500ppm)	428909	124	64	83.3397 min, 2.431 s	0.071	729
Stigmastanol	4.79	43.07	XIC(43.07Â±500ppm)	848388	247	106	83.4231 min, 3.321 s	0.121	828
Nonacosan-14-one	2.78	43.07	XIC(43.07Â±500ppm)	1106469	174	133	83.7564 min, 2.236 s	0.068	771
22,23-Dibromostigmasterol acetate	1.97	55.07	XIC(55.07Â±500ppm)	937920	138	120	83.9231 min, 3.610 s	0.211	718
ÃŸ-Sitosterol	1.1	43.07	XIC(43.07Â±500ppm)	30861309	1944	1226	84.1731 min, 3.596 s	0.115	920
ÃŸ-Amyrone	1.17	218.2	XIC(218.20Â±500ppm)	3875927	727	1244	84.3398 min, 4.220 s	0.13	888
Fucosterol	0.73	55.07	XIC(55.07Â±500ppm)	1098518	163	135	84.5898 min, 3.816 s	0.109	801
Triacontanoic acid, methyl ester	1.1	74.04	XIC(74.04Â±500ppm)	5294500	2219	851	84.6732 min, 2.365 s	0.074	849
ÃŸ-Amyrin	1.13	218.2	XIC(218.20Â±500ppm)	15092631	3739	3138	84.7565 min, 4.330 s	0.135	895
9,19-Cyclolanost-24-en-3-ol, (3ÃŸ)-	0.64	69.08	XIC(69.08Â±500ppm)	5828643	349	651	84.9232 min, 4.081 s	0.122	803
4-Campestene-3-one	1.31	43.07	XIC(43.07Â±500ppm)	1775961	428	167	85.0065 min, 4.121 s	0.135	762
Stigmastane, 3-oxo-	1.08	43.07	XIC(43.07Â±500ppm)	3102748	424	225	85.1732 min, 3.976 s	0.12	818
Lup-20(29)-en-3-one	1.16	95.08	XIC(95.08Â±500ppm)	3161733	387	498	85.2565 min, 4.634 s	0.14	892
4,22-Stigmastadiene-3-one	1.44	55.07	XIC(55.07Â±500ppm)	3284339	244	302	85.6732 min, 4.248 s	0.126	836
Lupeol	1.03	55.07	XIC(55.07Â±500ppm)	7786216	820	512	85.6732 min, 4.763 s	0.146	888
Stigmasta-3,5-dien-7-one	1.08	174.1	XIC(174.10Â±500ppm)	4194381	888	1510	86.0066 min, 4.435 s	0.133	844
Triacontyl acetate	1.12	43.06	XIC(43.06Â±500ppm)	16072574	2047	998	86.1733 min, 2.534 s	0.08	933
Lup-20(29)-en-3-ol, acetate, (3ÃŸ)-	1.08	43.06	XIC(43.06Â±500ppm)	1933286	364	135	86.59 min, 4.424 s	0.171	746
?-Sitostenone	1	124.08	XIC(124.08Â±500ppm)	6289328	847	2184	86.7567 min, 4.603 s	0.135	767
Lanosta-8,24-dien-3-ol, acetate, (3ÃŸ)-	3.46	69.08	XIC(69.08Â±500ppm)	21159824	1558	2178	86.84 min, 4.160 s	0.131	822
Germanicol acetate	5	43.05	XIC(43.05Â±500ppm)	976048	110	74	87.0067 min, 4.412 s	0.206	791
Friedelan-3-one	0.84	69.08	XIC(69.08Â±500ppm)	2971801	227	299	87.2567 min, 5.667 s	0.164	882
Thunbergol	0.27	95.08	XIC(95.08Â±500ppm)	890560	185	170	87.34 min, 5.552 s	0.194	753
D:A-Friedooleanan-3-ol, (3a)-	1.14	95.08	XIC(95.08Â±500ppm)	9863693	1388	876	87.6734 min, 5.689 s	0.184	827
1-Propanone, 2,2-dimethyl-1-(4-phenoxyphenyl)-	1.75	197.07	XIC(197.07Â±500ppm)	2003582	201	661	90.8403 min, 6.146 s	0.067	710
Tetracosyl benzoate	1.12	123.04	XIC(123.04Â±500ppm)	1074088	304	662	91.9237 min, 4.650 s	0.139	872
4-Methoxybenzoic acid, 2,3-dichlorophenyl ester	1.59	135.07	XIC(135.07Â±500ppm)	12018939	136	1700	94.8406 min, 6.168 s	0.066	710
p-Anisic acid, 3,4-dichlorophenyl ester	1.77	135.05	XIC(135.05Â±500ppm)	11801172	264	1796	95.5074 min, 6.164 s	0.057	799
2-Oxo-4-phenyl-6-(4-chlorophenyl)-1,2-dihydropyrimidine	2.46	281.12	XIC(281.12Â±500ppm)	50996320	459	7961	96.2574 min, 5.997 s	0.035	817

## Sheet: Melia azedarach (PTFE4)
Name	Tailing.Factor	Base.Mass	Quant.Masses	Area	Peak.S.N	Quant.S.N	R.T...min.	FWHH..s.	Similarity
2-Propanol, 2-methyl-	1.1	59.06	XIC(59.06±500ppm)	83806716	3141	4225	4.00004 min, 1.522 s	0.099	731
Acetoin	0.92	45.03	XIC(45.03±500ppm)	249872035	1722	3815	4.00004 min, 6.484 s	0.231	753
D-Allothreonine	0.56	57.08	XIC(57.08±500ppm)	51982035	2249	5966	4.25006 min, 1.606 s	0.143	733
1H-Pyrrole, 3-methyl-	1.08	81.05	XIC(81.05±500ppm)	1234176	279	319	4.41674 min, 1.957 s	0.1	827
2,2-Dimethyl-3-heptanone	2.55	57.08	XIC(57.08±500ppm)	55755402	1168	6692	4.7501 min, 6.480 s	0.114	701
2,2'-Bipyrrolidine	0.69	70.08	XIC(70.08±500ppm)	19782059	210	1868	4.91678 min, 1.555 s	0.099	729
3-Butene-1,2-diol, 1-(2-furanyl)-	1.19	97.09	XIC(97.09±500ppm)	40924133	227	10906	4.91678 min, 1.594 s	0.048	748
Cyclohexane, 1,2-dimethyl- (cis/trans)	1.32	55.06	XIC(55.06±500ppm)	317348045	19770	11513	5.08346 min, 1.592 s	0.148	888
2(5H)-Furanone	1.24	55.03	XIC(55.03±500ppm)	3286264	1064	409	5.08346 min, 2.523 s	0.117	789
Thiophene, 3-ethyl-	0.95	97.09	XIC(97.09±500ppm)	18450901	1015	6449	5.50016 min, 1.643 s	0.141	730
2-Thiopheneacetic acid, hex-4-yn-3-yl ester	0.62	97.09	XIC(97.09±500ppm)	6905559	462	2322	5.66684 min, 1.653 s	0.181	703
Cyclopentane, 1-ethyl-2-methyl-, cis-	2.67	55.07	XIC(55.07±500ppm)	33510007	840	1644	5.75018 min, 1.586 s	0.128	893
Maleic anhydride	1.15	54.03	XIC(54.03±500ppm)	8071015	1391	1452	7.16696 min, 3.611 s	0.139	955
Cyclopropane, 1-butyl-2-pentyl-, cis-	1.25	56.07	XIC(56.07±500ppm)	1634759	214	220	8.0837 min, 1.762 s	0.145	732
4-Cyclopentene-1,3-dione	1.1	96.01	XIC(96.01±500ppm)	4197386	1213	1380	8.0837 min, 3.376 s	0.14	865
o-Xylene	1.13	91.05	XIC(91.05±500ppm)	4251734	602	633	8.33372 min, 2.370 s	0.132	861
N-Benzyl-2-phenethylamine	1.16	91.05	XIC(91.05±500ppm)	2716549	473	413	10.6672 min, 2.420 s	0.119	879
Benzene, 1,3-dichloro-	1.18	145.96	XIC(145.96±500ppm)	430326	308	535	13.0841 min, 3.011 s	0.12	733
1,3-Propanediol, 2-ethyl-2-(hydroxymethyl)-	1.06	43.04	XIC(43.04±500ppm)	1064953	209	78	14.4175 min, 1.760 s	0.124	708
Oxalic acid, dodecyl isobutyl ester	1	57.08	XIC(57.08±500ppm)	982161	222	244	14.8342 min, 1.807 s	0.133	737
Benzene, n-butyl-	1.1	91.05	XIC(91.05±500ppm)	1643494	359	303	15.1676 min, 2.553 s	0.115	919
Phenol, 2-methyl-	1.18	108.05	XIC(108.05±500ppm)	737032	263	357	15.2509 min, 3.179 s	0.129	799
Benzene, 1-methyl-4-(1-methylethenyl)-	1.03	117.07	XIC(117.07±500ppm)	518798	369	241	16.6677 min, 2.824 s	0.121	894
Phenol, 2-methoxy-	1.08	109.03	XIC(109.03±500ppm)	1209110	373	611	16.6677 min, 3.579 s	0.138	891
2-Tridecene, (Z)-	0.83	41.05	XIC(41.05±500ppm)	6240670	418	228	16.8344 min, 1.901 s	0.085	909
Levoglucosenone	1.04	68.04	XIC(68.04±500ppm)	2335044	397	473	17.8345 min, 4.725 s	0.184	896
Benzene, 1-chloro-2-isocyanato-	1.09	153	XIC(153.00±500ppm)	333175	228	274	18.8346 min, 3.247 s	0.111	864
Methyl-a-d-ribofuranoside	1.11	57.06	XIC(57.06±500ppm)	705874	578	400	20.0847 min, 5.031 s	0.173	745
1,4:3,6-Dianhydro-a-d-glucopyranose	1.24	69.05	XIC(69.05±500ppm)	447477	244	225	22.1682 min, 4.820 s	0.152	777
Benzofuran, 2,3-dihydro-	1.08	120.06	XIC(120.06±500ppm)	2004423	869	1057	22.7515 min, 3.553 s	0.123	825
Dodecane, 5-methyl-	1.67	57.08	XIC(57.08±500ppm)	289704	150	124	22.8349 min, 1.833 s	0.127	747
Pentadecafluorooctanoic acid, 2-ethylhexyl ester	1.07	57.05	XIC(57.05±500ppm)	1176241	222	301	23.6683 min, 2.301 s	0.102	784
1H-Inden-1-one, 2,3-dihydro-	1.22	104.06	XIC(104.06±500ppm)	397644	301	136	25.2517 min, 4.680 s	0.165	841
Resorcinol	1.12	110.03	XIC(110.03±500ppm)	2800472	555	840	25.8351 min, 3.982 s	0.134	883
Benzaldehyde, 3-hydroxy-	1.13	122.04	XIC(122.04±500ppm)	598881	240	337	26.7519 min, 4.069 s	0.121	882
Eugenol	1.15	164.09	XIC(164.09±500ppm)	398487	191	379	28.8354 min, 3.458 s	0.118	861
Benzaldehyde, 4-hydroxy-	1.22	121.03	XIC(121.03±500ppm)	2345553	1096	1008	29.0854 min, 4.226 s	0.138	913
Vanillin	1.15	151.04	XIC(151.04±500ppm)	5867153	941	2250	30.5022 min, 4.583 s	0.145	917
Naphthalene, 2,6-dimethyl-	1.04	156.09	XIC(156.09±500ppm)	249963	157	239	30.5855 min, 3.618 s	0.115	854
Acenaphthylene	1.12	152.06	XIC(152.06±500ppm)	1250045	358	501	32.3356 min, 4.437 s	0.138	905
Phenol, 2-methoxy-4-(1-propenyl)-	1.1	164.09	XIC(164.09±500ppm)	1470487	560	889	32.669 min, 3.615 s	0.115	915
Phenol, 2-methoxy-4-propyl-	1.16	137.06	XIC(137.06±500ppm)	1700773	621	855	33.0024 min, 4.410 s	0.143	850
1,3-Benzenediol, 4-ethyl-	1.08	123.04	XIC(123.04±500ppm)	432079	183	284	33.4191 min, 3.980 s	0.118	788
1-(4-Hydroxybenzylidene)acetone	1.06	147.05	XIC(147.05±500ppm)	3427150	418	1046	34.0024 min, 4.140 s	0.131	732
Apocynin	1.16	151.04	XIC(151.04±500ppm)	3481849	1349	1347	34.0858 min, 4.433 s	0.145	906
1-Pentadecene	0.94	43.07	XIC(43.07±500ppm)	1762768	488	207	34.4191 min, 1.954 s	0.062	929
1-Naphthalenol	1.18	115.06	XIC(115.06±500ppm)	717635	374	244	35.0025 min, 4.484 s	0.144	797
2H-1-Benzopyran-2-one, 3,4-dihydro-6-hydroxy-	1.1	122.04	XIC(122.04±500ppm)	957413	865	433	35.2525 min, 5.083 s	0.158	758
Benzene, 1,2,3-trimethoxy-5-methyl-	1.08	167.07	XIC(167.07±500ppm)	2810981	830	1451	35.7526 min, 3.756 s	0.122	752
2-Propanone, 1-(4-hydroxy-3-methoxyphenyl)-	1.09	137.06	XIC(137.06±500ppm)	6587583	1087	2360	35.9193 min, 4.306 s	0.137	836
5-n-Propylhydantoin	1.03	43.05	XIC(43.05±500ppm)	1395094	394	108	36.336 min, 4.633 s	0.144	743
2H-1-Benzopyran-2-one, 8-hydroxy-	1.13	134.04	XIC(134.04±500ppm)	894642	254	527	36.9193 min, 5.238 s	0.155	879
2,6-Dimethoxybenzoquinone	1.04	69.01	XIC(69.01±500ppm)	3257092	1082	742	37.2527 min, 5.851 s	0.181	898
4-(1-Hydroxyallyl)-2-methoxyphenol	1.02	137.06	XIC(137.06±500ppm)	1470744	452	701	37.5861 min, 4.356 s	0.135	865
3-Allyl-6-methoxyphenol	1.26	164.09	XIC(164.09±500ppm)	403334	181	293	37.9194 min, 3.876 s	0.117	707
Butyrovanillone	1.11	151.04	XIC(151.04±500ppm)	1375875	405	774	38.0861 min, 4.173 s	0.127	829
1,6:2,3-Dianhydro-4-O-acetyl-ß-d-talopyranose	1.08	43.04	XIC(43.04±500ppm)	7320653	457	345	38.1694 min, 4.727 s	0.182	716
4-Hydroxy-1-indanone	1.2	91.06	XIC(91.06±500ppm)	831509	334	130	38.6695 min, 5.117 s	0.157	866
Phenol, 2,6-dimethoxy-4-(2-propenyl)-	1.02	194.1	XIC(194.10±500ppm)	1222409	467	814	38.7528 min, 3.772 s	0.118	877
1-Naphthalenol, 2-methyl-	0.91	158.07	XIC(158.07±500ppm)	671558	199	426	38.9195 min, 4.381 s	0.139	845
Phenol, 3,4,5-trimethoxy-	1.14	169.05	XIC(169.05±500ppm)	516571	179	307	39.0028 min, 4.419 s	0.137	822
2(3H)-Benzofuranone, 3-methyl-	1.09	120.06	XIC(120.06±500ppm)	820256	324	353	39.0862 min, 5.026 s	0.162	845
6-Hydroxy-4-methylcoumarin	1.08	176.05	XIC(176.05±500ppm)	338605	129	244	39.6696 min, 4.769 s	0.141	819
2H-1-Benzopyran-2-one, 3,4-dihydro-6-methyl-	1.06	162.07	XIC(162.07±500ppm)	693287	185	387	39.7529 min, 4.939 s	0.141	806
Benzenepropanol, 4-hydroxy-3-methoxy-	1.06	137.06	XIC(137.06±500ppm)	2299156	506	848	40.3363 min, 4.177 s	0.129	841
1(2H)-Acenaphthylenone	1.2	140.06	XIC(140.06±500ppm)	578161	320	365	40.4196 min, 5.132 s	0.158	866
2-Propenal, 3-(3,4-dimethoxyphenyl)-	1.07	192.08	XIC(192.08±500ppm)	1062349	396	708	41.3364 min, 4.329 s	0.132	702
n-Nonadecanol-1	0.94	43.07	XIC(43.07±500ppm)	548415	133	68	41.4197 min, 2.298 s	0.069	898
Methyl 3-(4-hydroxy-3-methoxyphenyl)propanoate	0.94	137.06	XIC(137.06±500ppm)	456241	167	225	41.503 min, 3.921 s	0.115	790
Cyclopropane, 1-(1-methylethyl)-2-nonyl-	1.13	56.08	XIC(56.08±500ppm)	1024761	299	273	41.7531 min, 1.939 s	0.062	861
ß-D-Glucopyranose, 1,6-anhydro-, triacetate	1.18	43.04	XIC(43.04±500ppm)	1887081	195	183	42.0864 min, 4.159 s	0.137	709
3-Hydroxybiphenyl	1.24	170.07	XIC(170.07±500ppm)	602866	308	416	42.2531 min, 4.362 s	0.128	801
1,4-diazabicyclo[4.3.0]nonan-2,5-dione, 3-methyl	0.62	70.07	XIC(70.07±500ppm)	1564347	438	396	42.2531 min, 6.342 s	0.198	766
Homosyringaldehyde	1.05	167.07	XIC(167.07±500ppm)	1183607	434	696	42.4198 min, 4.512 s	0.137	814
p-Hydroxybiphenyl	1.11	170.08	XIC(170.08±500ppm)	971588	323	578	42.5865 min, 4.431 s	0.132	858
Benzaldehyde, 2-hydroxy-3-(2-propenyl)-	1.09	134.07	XIC(134.07±500ppm)	338648	154	188	42.6698 min, 4.806 s	0.148	726
9H-Fluoren-9-one	1.37	180.06	XIC(180.06±500ppm)	3136698	1225	917	43.2532 min, 4.749 s	0.155	944
2-Hexadecene, 3,7,11,15-tetramethyl-, [R-[R*,R*-(E)]]-	1.57	57.09	XIC(57.09±500ppm)	4280687	953	594	43.3365 min, 1.850 s	0.066	853
Coniferyl aldehyde	1.09	178.06	XIC(178.06±500ppm)	4840003	3025	1640	43.3365 min, 4.475 s	0.141	834
2-Propenoic acid, 3-(4-hydroxyphenyl)-, methyl ester	1.26	147.05	XIC(147.05±500ppm)	306048	127	138	43.9199 min, 4.201 s	0.14	738
Syringylacetone	1.08	167.07	XIC(167.07±500ppm)	31834203	2654	6789	44.7533 min, 4.318 s	0.137	872
Benzoic acid, 4-hydroxy-3,5-dimethoxy-, hydrazide	1.11	181.05	XIC(181.05±500ppm)	739747	249	421	44.8366 min, 4.198 s	0.126	823
9H-Fluorene, 9-methylene-	1.16	178.08	XIC(178.08±500ppm)	2151625	204	1091	45.0033 min, 4.556 s	0.147	918
5-Undecene, 3-methyl-, (Z)-	0.91	70.08	XIC(70.08±500ppm)	715097	262	265	45.3367 min, 1.904 s	0.059	805
Cyclo(L-prolyl-L-valine)	1.07	70.07	XIC(70.07±500ppm)	1381563	493	306	45.9201 min, 5.170 s	0.165	896
cis-Sinapyl alcohol	1.09	167.07	XIC(167.07±500ppm)	1495659	282	641	46.3368 min, 4.283 s	0.132	704
1-Propanone, 1-(4-hydroxy-3,5-dimethoxyphenyl)-	1.21	181.05	XIC(181.05±500ppm)	10168458	1440	2549	46.5868 min, 4.056 s	0.15	865
9H-Carbazole-9-methanol	1.1	167.07	XIC(167.08±500ppm)	2786838	375	948	46.7535 min, 4.986 s	0.147	909
Neophytadiene	1.09	68.07	XIC(68.07±500ppm)	656502	292	224	47.0868 min, 1.897 s	0.059	904
9-Phenanthrenol	1.29	165.08	XIC(165.08±500ppm)	393026	139	194	48.3369 min, 4.523 s	0.137	822
2-Hydroxyfluorene	1.19	182.08	XIC(182.08±500ppm)	340761	295	212	48.5036 min, 4.550 s	0.138	854
Anthracene, 2-methyl-	1.28	192.1	XIC(192.10±500ppm)	1201242	258	616	48.5869 min, 4.170 s	0.124	902
1H-Phenalen-1-one	1.14	152.07	XIC(152.07±500ppm)	4206350	874	1076	48.6703 min, 5.439 s	0.169	926
Anthracene, 1-methyl-	1.18	192.1	XIC(192.10±500ppm)	1696481	348	826	48.7536 min, 4.227 s	0.128	898
5-(3-Hydroxypropyl)-2,3-dimethoxyphenol	1.05	168.08	XIC(168.08±500ppm)	2017147	451	773	48.837 min, 4.062 s	0.123	836
Pyrrolo[1,2-a]pyrazine-1,4-dione, hexahydro-3-(2-methylpropyl)-	1.04	70.07	XIC(70.07±500ppm)	686947	208	174	49.1703 min, 4.731 s	0.134	747
2-n-Octylfuran	1.11	81.04	XIC(81.04±500ppm)	505797	178	204	49.2537 min, 2.125 s	0.064	781
4H-Cyclopenta[def]phenanthrene	1.07	190.08	XIC(190.08±500ppm)	724874	685	492	49.2537 min, 4.505 s	0.146	765
Hexadecanal, 2-methyl-	1.1	58.06	XIC(58.06±500ppm)	381795	139	119	49.587 min, 2.019 s	0.063	768
5,10-Diethoxy-2,3,7,8-tetrahydro-1H,6H-dipyrrolo[1,2-a:1',2'-d]pyrazine	1.66	70.07	XIC(70.07±500ppm)	8817751	1217	1409	50.0037 min, 5.805 s	0.183	834
4-Hydroxy-9-fluorenone	1.56	196.06	XIC(196.06±500ppm)	511409	163	289	50.3371 min, 4.912 s	0.156	860
9,10-Anthracenedione	1.16	180.06	XIC(180.06±500ppm)	718789	265	296	50.9205 min, 4.851 s	0.15	858
Phthalic acid, 4-methylpent-2-yl nonyl ester	2.42	149.03	XIC(149.03±500ppm)	650576	257	279	51.4205 min, 2.801 s	0.094	768
trans-Sinapaldehyde	1.1	208.08	XIC(208.08±500ppm)	4877455	1121	1452	51.5872 min, 4.199 s	0.127	864
Diamyl phthalate	1.15	149.02	XIC(149.02±500ppm)	9633046	2531	2616	52.4206 min, 2.792 s	0.096	801
Naphthalic anhydride	1.21	126.05	XIC(126.05±500ppm)	961875	515	472	52.9206 min, 5.507 s	0.165	930
Phthalic acid, hex-3-yl isobutyl ester	1.19	149.03	XIC(149.03±500ppm)	4683602	984	1267	53.004 min, 2.789 s	0.093	850
Phenanthrene, 3,6-dimethyl-	1.62	206.11	XIC(206.11±500ppm)	379725	208	261	53.004 min, 3.947 s	0.13	804
1-Propene-1-thiol	2.35	73.04	XIC(73.04±500ppm)	957888	126	364	53.004 min, 6.018 s	0.047	766
Cyclopenta(def)phenanthrenone	1.22	204.06	XIC(204.06±500ppm)	1630987	591	696	53.1706 min, 4.807 s	0.149	914
Phenanthrene, 2,5-dimethyl-	1.47	206.11	XIC(206.11±500ppm)	365000	171	233	53.3373 min, 4.030 s	0.119	829
Fluoranthene	1.34	202.08	XIC(202.08±500ppm)	18965789	4348	2958	53.6707 min, 4.507 s	0.144	961
Phthalic acid, isobutyl pent-4-enyl ester	1.15	149.03	XIC(149.03±500ppm)	2517734	1004	939	54.3374 min, 3.241 s	0.103	756
Allyl heptanoate	0.59	43.07	XIC(43.07±500ppm)	268155	118	45	54.6708 min, 2.040 s	0.071	707
Phthalic acid, monooctyl ester	1.07	149.03	XIC(149.03±500ppm)	1489452	450	794	55.0875 min, 2.676 s	0.084	805
9,12-Octadecadienoic acid, methyl ester	0.97	67.07	XIC(67.07±500ppm)	429948	129	132	55.1708 min, 2.208 s	0.065	875
Pyrene	1.3	202.08	XIC(202.08±500ppm)	19875013	4077	3407	55.2541 min, 4.716 s	0.152	925
Benzo[b]naphtho[2,3-d]furan	1.42	218.07	XIC(218.07±500ppm)	2253757	477	963	55.5042 min, 4.186 s	0.133	902
Dimethyl palmitamine	1.06	58.08	XIC(58.08±500ppm)	10870281	3775	2162	55.5875 min, 1.830 s	0.054	899
Phthalic acid, 2-methylbutyl pentyl ester	1.05	149.03	XIC(149.03±500ppm)	764378	418	490	55.5875 min, 2.820 s	0.091	844
Phthalic acid, butyl pent-4-enyl ester	1.13	149.02	XIC(149.02±500ppm)	4710928	2863	2238	55.8375 min, 3.239 s	0.103	814
1-Phenanthrenol	1.03	194.08	XIC(194.08±500ppm)	601189	188	333	56.1709 min, 4.766 s	0.157	754
Phthalic acid, cyclohexyl 2-pentyl ester	1.09	149.03	XIC(149.03±500ppm)	1266539	577	771	56.5042 min, 3.089 s	0.1	760
Oxacycloheptadec-8-en-2-one, (8Z)-	1.2	55.07	XIC(55.07±500ppm)	665115	276	113	56.5876 min, 2.791 s	0.089	889
2-Piperidinone, N-[4-bromo-n-butyl]-	0.77	43.06	XIC(43.06±500ppm)	1087226	409	131	56.9209 min, 2.213 s	0.067	740
7H-Benzo[c]fluorene	1.23	216.1	XIC(216.10±500ppm)	1054106	332	592	57.3376 min, 4.143 s	0.136	906
Eicosyl acetate	1.22	43.06	XIC(43.06±500ppm)	1038895	224	111	58.5044 min, 1.948 s	0.06	812
Cannabidivarol	1.05	203.11	XIC(203.11±500ppm)	11781893	4935	4191	58.7544 min, 3.099 s	0.098	885
Pyrene, 2-methyl-	1.14	216.1	XIC(216.10±500ppm)	903970	246	510	58.7544 min, 4.363 s	0.144	905
Phenanthrene, 2,3,5-trimethyl-	1.34	220.13	XIC(220.13±500ppm)	214185	110	160	58.8378 min, 3.909 s	0.106	772
1H,4H-Pyrazolo[3,4-b]pyran-5-carbonitrile, 6-amino-4-(3,4-dichlorophenyl)-3-propyl-	1.1	203.11	XIC(203.11±500ppm)	1442204	615	763	59.2545 min, 2.877 s	0.089	708
Hexadecanoic acid, 2-hydroxy-1-(hydroxymethyl)ethyl ester	1.16	43.06	XIC(43.06±500ppm)	1026378	293	123	59.6712 min, 2.200 s	0.063	774
Pyrene, 1-methyl-	1.19	216.09	XIC(216.09±500ppm)	839049	362	429	59.6712 min, 4.442 s	0.14	929
N,N-Dimethyldodecanamide	1.03	87.07	XIC(87.07±500ppm)	238019	177	186	59.7545 min, 2.317 s	0.066	704
(E)-Dodec-5-en-4-olide	0.22	41.06	XIC(41.06±500ppm)	154817	199	19	61.0879 min, 2.570 s	0.094	771
6,11-Dimethyl-2,6,10-dodecatrien-1-ol	0.99	69.08	XIC(69.08±500ppm)	368859	116	101	61.2546 min, 2.266 s	0.068	762
13-Octadecenal, (Z)-	2.03	55.07	XIC(55.07±500ppm)	1473475	603	182	61.338 min, 2.427 s	0.088	797
d9-Tetrahydrocannabivarin	1.02	203.11	XIC(203.11±500ppm)	689236	325	436	61.4213 min, 3.158 s	0.09	875
Pyrrolo[1,2-a]pyrazine-1,4-dione, hexahydro-3-(phenylmethyl)-	1.04	125.07	XIC(125.07±500ppm)	617595	469	393	61.4213 min, 5.174 s	0.147	807
phenol, 4,4'-[dithiobis(methylene)]bis[2-methoxy-	1.02	137.06	XIC(137.06±500ppm)	2903399	979	1830	61.588 min, 3.850 s	0.112	769
Eicosanoic acid, methyl ester	1.08	74.04	XIC(74.04±500ppm)	801930	403	293	61.838 min, 1.929 s	0.053	878
11H-Benzo[a]fluoren-11-one	1.01	230.08	XIC(230.08±500ppm)	596769	165	340	62.0047 min, 4.500 s	0.134	839
Oxalic acid, cyclohexyl decyl ester	1.04	83.04	XIC(83.04±500ppm)	363631	160	181	62.2547 min, 2.388 s	0.071	749
Cannabichromene	1.14	231.14	XIC(231.14±500ppm)	891003	410	544	62.8381 min, 2.889 s	0.088	827
Benzo[ghi]fluoranthene	1.27	226.08	XIC(226.08±500ppm)	4072221	534	1190	63.0048 min, 4.515 s	0.14	909
Cannabinol	1.07	295.18	XIC(295.18±500ppm)	397668	323	683	63.0881 min, 2.960 s	0.092	786
1H-Trindene, 2,3,4,5,6,7,8,9-octahydro-1,1,4,4,7,7-hexamethyl-	1.08	267.15	XIC(267.15±500ppm)	4404854	3239	2677	63.0881 min, 3.230 s	0.097	775
Cannabidiol	1.07	231.14	XIC(231.14±500ppm)	22526150	8256	6753	64.3382 min, 2.866 s	0.09	918
Benz[a]anthracene	1.42	228.1	XIC(228.10±500ppm)	3891558	712	1151	64.5882 min, 4.374 s	0.134	941
1H-4-Oxabenzo(f)cyclobut(cd)inden-8-ol, 1a-a,2,3,3a,8b-a,8c-a-hexahydro-1,1,3a-trimethyl-6-pentyl-	1	231.14	XIC(231.14±500ppm)	600852	305	433	64.6716 min, 2.871 s	0.091	773
Benz[a]anthracene:2	1.54	228.1	XIC(228.10±500ppm)	5535435	1076	1409	64.8382 min, 4.500 s	0.146	945
7H-Benz[de]anthracen-7-one	1.35	230.07	XIC(230.07±500ppm)	940016	311	524	65.755 min, 4.873 s	0.144	883
1,6-Dibenzofurandiol, 5a,6,7,8,9,9a-hexahydro-6-methyl-9-(1-methylethenyl)-3-pentyl-, (5aa,6a,9a,9aa)-	1.09	43.04	XIC(43.04±500ppm)	1219684	412	133	66.005 min, 3.070 s	0.097	749
Naphtho[2,1,8,7-klmn]xanthene	1.37	242.08	XIC(242.08±500ppm)	478665	181	288	66.1717 min, 4.451 s	0.124	793
Benzoic acid, octadecyl ester	1.04	123.04	XIC(123.04±500ppm)	126704	102	105	66.5884 min, 2.220 s	0.06	782
Dronabinol	1.09	41.06	XIC(41.06±500ppm)	691215	409	77	66.8384 min, 2.925 s	0.087	917
Docosanoic acid, methyl ester	1.09	74.04	XIC(74.04±500ppm)	2525211	1082	955	67.0884 min, 1.867 s	0.054	711
Chrysene, 1-methyl-	1.06	242.11	XIC(242.11±500ppm)	408038	190	335	67.8385 min, 4.114 s	0.142	910
Pyrrolidine, 1-(1-oxopentyl)-	1.05	113.08	XIC(113.08±500ppm)	354113	258	255	68.1718 min, 2.409 s	0.069	793
Undecanoic acid, ethyl ester	1.48	43.07	XIC(43.07±500ppm)	4185753	321	279	68.7552 min, 1.825 s	0.053	704
(E)-3,3'-Dimethoxy-4,4'-dihydroxystilbene	1.13	272.11	XIC(272.11±500ppm)	1006448	301	938	69.8386 min, 3.745 s	0.107	845
3-(3,4-Dimethoxyphenyl)-7-hydroxychromen-2-one	1.12	298.13	XIC(298.13±500ppm)	1264358	498	1162	70.5054 min, 3.537 s	0.104	733
Octane-3,6-dimethyl-1,8-bis-(2-oxytetrahydro-2H-pyranyl)	1.24	85.07	XIC(85.07±500ppm)	522822	197	203	71.5888 min, 1.812 s	0.055	719
Tetracosanoic acid, methyl ester	1.07	74.04	XIC(74.04±500ppm)	2920187	1017	710	71.9221 min, 1.821 s	0.053	867
Benzo[k]fluoranthene	1.33	252.1	XIC(252.10±500ppm)	2075989	538	1052	72.2555 min, 4.394 s	0.129	925
Perylene	1.26	252.1	XIC(252.10±500ppm)	1105358	330	521	72.9222 min, 4.472 s	0.136	904
Benzo(a)pyrene-4,5-dione	1.15	254.08	XIC(254.08±500ppm)	472832	194	328	74.1723 min, 5.015 s	0.138	747
Benzo[j]fluoranthene	1.21	252.1	XIC(252.11±500ppm)	2354432	904	859	74.2557 min, 4.676 s	0.142	925
Phthalic acid, heptadecyl 6-methylhept-2-yl ester	1.14	149.03	XIC(149.03±500ppm)	452369	156	286	74.4223 min, 2.083 s	0.063	710
Eicosane, 2,4-dimethyl-	1.01	43.07	XIC(43.07±500ppm)	5950127	1139	406	74.6724 min, 1.617 s	0.048	865
3a,5-Cyclo-5a-ergosta-6,8(14).22t-triene	1.01	55.07	XIC(55.07±500ppm)	176534	101	31	74.6724 min, 2.397 s	0.074	772
d-Tocopherol	1.02	137.06	XIC(137.06±500ppm)	941187	440	444	76.6725 min, 2.251 s	0.066	869
2-Hexyl-1-octanol	0.6	43.07	XIC(43.07±500ppm)	331920	117	57	76.7559 min, 2.175 s	0.078	798
ß-Sitosterol acetate	0.8	43.07	XIC(43.07±500ppm)	785331	231	77	76.9225 min, 2.268 s	0.073	794
Citronellol epoxide (R or S)	5.53	55.07	XIC(55.07±500ppm)	210732	125	44	77.5893 min, 2.240 s	0.066	719
Ergost-5-en-3-ol, acetate, (3ß,24R)-	1	43.07	XIC(43.07±500ppm)	573562	176	72	77.7559 min, 2.421 s	0.071	829
24-Noroleana-3,12-diene	1.14	218.2	XIC(218.20±500ppm)	2281261	929	1301	78.1726 min, 2.652 s	0.08	866
2-Tetradecanone	0.32	43.06	XIC(43.06±500ppm)	359397	247	48	78.3393 min, 1.846 s	0.068	734
9,19-Cycloergost-24(28)-en-3-ol, 4,14-dimethyl-, acetate, (3ß,4a,5a)-	0.47	69.08	XIC(69.08±500ppm)	727452	171	172	78.5893 min, 2.529 s	0.077	790
?-Tocopherol	1.04	151.08	XIC(151.08±500ppm)	429941	265	277	78.6727 min, 2.342 s	0.067	866
Oxalic acid, cyclohexylmethyl decyl ester	0.36	97.1	XIC(97.10±500ppm)	895135	309	390	79.006 min, 1.794 s	0.052	832
24-Norursa-3,12-diene	1.12	218.2	XIC(218.20±500ppm)	5486724	1640	2037	79.0894 min, 2.831 s	0.087	856
Stigmasta-3,5-diene	1.09	43.07	XIC(43.07±500ppm)	2043280	518	222	79.6728 min, 2.590 s	0.076	868
(Z)-(Z)-Hex-3-en-1-yl 2-methylbut-2-enoate	1.76	82.08	XIC(82.08±500ppm)	9581145	675	2031	80.0895 min, 1.890 s	0.056	766
1,3,6,10-Cyclotetradecatetraene, 3,7,11-trimethyl-14-(1-methylethyl)-, [S-(E,Z,E,E)]-	1.4	121.1	XIC(121.10±500ppm)	477686	188	189	80.8395 min, 3.078 s	0.169	739
Indeno[1,2,3-cd]pyrene	1.18	276.1	XIC(276.10±500ppm)	557031	241	446	80.9229 min, 5.667 s	0.165	914
Benzo[ghi]perylene	1.11	276.1	XIC(276.10±500ppm)	867836	387	506	82.3396 min, 1.584 s	0.197	917
Campesterol	1.12	43.07	XIC(43.07±500ppm)	1647852	210	157	82.423 min, 3.259 s	0.099	874
Stigmasterol	1.02	55.07	XIC(55.07±500ppm)	938596	257	163	83.0897 min, 3.344 s	0.1	882
1,3-Dimethyl-(3,7-dimethyloctyl)cyclohexane	0.57	69.08	XIC(69.08±500ppm)	411888	108	113	83.173 min, 2.118 s	0.094	719
Lanosta-8,24-dien-3-one	1.16	69.08	XIC(69.08±500ppm)	3006947	276	481	84.3398 min, 3.865 s	0.118	795
ß-Amyrone	1.1	218.21	XIC(218.21±500ppm)	3514368	904	1588	84.3398 min, 4.218 s	0.129	891
Androstane-3,17-diol, 17-methyl-, (3a,5a,17ß)-	1.85	43.07	XIC(43.07±500ppm)	526999	384	52	84.4231 min, 3.600 s	0.171	768
2-Nonadecanone	0.98	59.06	XIC(59.06±500ppm)	1807418	541	752	84.5065 min, 2.374 s	0.071	846
Triacontanoic acid, methyl ester	1.11	74.04	XIC(74.04±500ppm)	477482	152	131	84.6732 min, 2.361 s	0.068	813
ß-Amyrin	1.12	218.21	XIC(218.21±500ppm)	4415477	1056	1635	84.7565 min, 4.327 s	0.129	884
9,19-Cyclolanost-24-en-3-ol, (3ß)-	0.64	69.08	XIC(69.08±500ppm)	3680852	357	487	84.9232 min, 4.078 s	0.123	813
4-Campestene-3-one	1	43.07	XIC(43.07±500ppm)	1192747	454	123	85.0065 min, 4.120 s	0.133	752
Stigmastane, 3-oxo-	1.21	43.07	XIC(43.07±500ppm)	815138	102	81	85.1732 min, 3.980 s	0.134	724
9,19-Cyclolanostan-3-ol, acetate, (3ß)-	0.55	43.07	XIC(43.07±500ppm)	870204	338	89	85.5899 min, 4.426 s	0.152	705
Lupeol	1.16	218.2	XIC(218.20±500ppm)	6493339	1011	1953	85.6732 min, 4.763 s	0.147	862
D:B-Friedo-B':A'-neogammacer-5-en-3-ol, (3ß)-	0.92	95.09	XIC(95.09±500ppm)	554740	142	133	85.8399 min, 4.834 s	0.237	756
Stigmasta-3,5-dien-7-one	1.12	174.11	XIC(174.11±500ppm)	1185917	545	809	86.0066 min, 4.432 s	0.129	810
Triacontyl acetate	1.06	43.07	XIC(43.07±500ppm)	3792954	375	344	86.1733 min, 2.527 s	0.083	841
?-Sitostenone	1.03	124.09	XIC(124.09±500ppm)	4703723	628	2122	86.7567 min, 4.603 s	0.133	810
Lanosta-8,24-dien-3-ol, acetate, (3ß)-	1.11	69.08	XIC(69.08±500ppm)	15168713	1511	1944	86.84 min, 4.158 s	0.129	821
Olean-12-en-3-ol, acetate, (3ß)-	1.17	218.21	XIC(218.21±500ppm)	18262574	2584	3531	86.84 min, 4.427 s	0.14	904
Germanicol acetate	1.62	43.05	XIC(43.05±500ppm)	304420	135	32	87.0067 min, 4.416 s	0.134	743
11-Hexadecynal	0.22	43.97	XIC(43.97±500ppm)	8676237	101	308	87.6734 min, 5.679 s	0.154	711
Heneicosanoic acid, methyl ester	1.22	74.04	XIC(74.04±500ppm)	278175	121	64	88.4235 min, 2.944 s	0.087	760
Ethane, 1,1-dimethoxy-	1.29	59.03	XIC(59.03±500ppm)	2884574	716	1738	94.924 min, 6.011 s	0.064	733
3,4-Methylenedioxy-N,N-diethylbenzylamine	1.99	135.09	XIC(135.09±500ppm)	13073528	201	1680	97.4242 min, 6.162 s	0.057	733

## Sheet: Plywood (PTFE5)
Name	Tailing.Factor	Base.Mass	Quant.Masses	Area	Peak.S.N	Quant.S.N	R.T...min.	FWHH..s.	Similarity
Acetic acid, 1,1-dimethylethyl ester	2.25	43	XIC(43.00Â±500ppm)	278695147	1101	1894	3.83336 min, 1.593 s	0.062	777
Formamide, N,N-dimethyl-	0.39	72.99	XIC(72.99Â±500ppm)	43249227	159	1554	4.00004 min, 1.768 s	0.119	711
(SS)- or (RR)-4-methyl-2,3-pentanediol	1.29	73.08	XIC(73.08Â±500ppm)	790336362	892	11242	4.08338 min, 1.524 s	0.13	714
Neopentane	3	57.02	XIC(57.02Â±500ppm)	32744947	189	3431	4.08338 min, 1.629 s	0.043	829
ÃŸ-Alanine	1.16	42.97	XIC(42.97Â±500ppm)	7564796	1119	1543	4.16672 min, 6.395 s	0.045	775
2-Pentene, (Z)-	0.92	42.06	XIC(42.06Â±500ppm)	14211658	464	343	4.3334 min, 1.659 s	0.12	747
1H-Pyrrole, 1-methyl-	1.14	81.06	XIC(81.06Â±500ppm)	8278168	1616	1898	4.41674 min, 1.959 s	0.101	846
Pentane, 2-methoxy-2,4,4-trimethyl-	1.44	73.06	XIC(73.06Â±500ppm)	45906901	476	3591	4.58342 min, 6.469 s	0.147	750
Pyrrole	1.16	67.05	XIC(67.05Â±500ppm)	24145181	2665	2423	4.7501 min, 2.083 s	0.098	876
2-Pyrazoline, 1-isobutyl-3-methyl-	1.13	97.09	XIC(97.09Â±500ppm)	50713303	288	9219	4.91678 min, 1.599 s	0.053	706
Acetamide	2	59.05	XIC(59.05Â±500ppm)	37328679	461	2892	5.00012 min, 2.622 s	0.143	963
Acetylacetone	1.09	43.03	XIC(43.03Â±500ppm)	4499911	174	161	5.25014 min, 2.001 s	0.096	727
Furan, 2-methoxy-	0.22	55.07	XIC(55.07Â±500ppm)	4811292	702	532	5.50016 min, 2.081 s	0.116	837
Acetamide, N-ethyl-	0.24	43.03	XIC(43.03Â±500ppm)	11148536	218	267	5.91686 min, 2.540 s	0.129	781
2-Phenyl-3-methyl-pyrrolo(2,3-b)pyrazine	1.22	208.04	XIC(208.04Â±500ppm)	200017682	265	20408	6.16688 min, 1.514 s	0.23	777
2-Ethoxytetrahydrofuran	0.45	71.05	XIC(71.05Â±500ppm)	1578025	250	475	6.25022 min, 2.046 s	0.118	820
2-Cyclopenten-1-one	1.19	82.04	XIC(82.04Â±500ppm)	3884591	711	911	6.50024 min, 2.957 s	0.133	840
Acetamide, N-methyl-	1.68	43.03	XIC(43.03Â±500ppm)	12284410	294	239	6.58358 min, 3.047 s	0.164	927
1-Octanol	2.02	43.08	XIC(43.08Â±500ppm)	3301043	151	214	6.66692 min, 1.649 s	0.145	751
Maleic anhydride	1.08	54.03	XIC(54.03Â±500ppm)	11847732	1415	1974	7.16696 min, 3.610 s	0.135	967
2-Mercapto-4,6-dimethylnicotinonitrile, TBDMS derivative	1.84	221.08	XIC(221.08Â±500ppm)	4270746	1286	3639	8.00036 min, 6.435 s	0.144	745
4-Cyclopentene-1,3-dione	1.13	96.02	XIC(96.02Â±500ppm)	6190076	2431	1902	8.0837 min, 3.370 s	0.143	872
Benzene, 1,3-dimethyl-	1.13	91.05	XIC(91.05Â±500ppm)	7048605	1034	1237	8.33372 min, 2.366 s	0.132	874
2H-Pyran, 2-(bromomethyl)tetrahydro-	1.68	85.06	XIC(85.06Â±500ppm)	808331	399	382	8.58374 min, 2.049 s	0.127	734
Butanoic acid, 4-hydroxy-	1.23	42.06	XIC(42.06Â±500ppm)	14036356	1078	344	9.08378 min, 4.396 s	0.184	973
p-Benzoquinone	1.07	54.03	XIC(54.03Â±500ppm)	105486427	3552	7818	9.25046 min, 3.850 s	0.159	933
N-Methylmaleimide	0.96	54.03	XIC(54.03Â±500ppm)	3122366	471	726	10.0005 min, 3.832 s	0.152	923
1,2-Propadiene-1,3-dione	1.11	68.04	XIC(68.04Â±500ppm)	8344276	3281	1621	10.3339 min, 3.969 s	0.154	761
Bicyclo[3.1.0]hex-2-ene, 4-methyl-1-(1-methylethyl)-	1.23	93.07	XIC(93.07Â±500ppm)	1231480	482	393	11.584 min, 2.206 s	0.17	858
4(3H)-Pyrimidinone, 3-methyl-	1.11	110.03	XIC(110.03Â±500ppm)	3411497	1068	1039	11.7507 min, 4.128 s	0.162	772
Cyclopentane, 1-hexyl-3-methyl-	1.16	55.07	XIC(55.07Â±500ppm)	604854	101	90	11.9173 min, 1.890 s	0.148	808
Carbon dioxide	1.88	44.01	XIC(44.01Â±500ppm)	4206341	139	99	11.9173 min, 3.680 s	0.054	771
2-Ethynyl pyridine	1.27	103.04	XIC(103.04Â±500ppm)	1836154	541	475	12.0007 min, 3.656 s	0.15	857
1H-Pyrrole-2,5-dione	1.13	97.01	XIC(97.01Â±500ppm)	4126447	2483	1409	12.334 min, 4.091 s	0.147	918
Benzofuran	1.08	118.04	XIC(118.04Â±500ppm)	4960464	1248	1868	12.4174 min, 3.202 s	0.137	934
p-Benzoquinone, 2-methyl-	1.09	54.03	XIC(54.03Â±500ppm)	27115820	1665	3038	13.1674 min, 3.969 s	0.149	891
Benzoxazole	1.69	119.04	XIC(119.04Â±500ppm)	3287741	825	933	13.4175 min, 3.566 s	0.164	903
Benzaldehyde, 2-hydroxy-	1.06	122.04	XIC(122.04Â±500ppm)	1208550	326	723	14.5009 min, 3.634 s	0.14	867
Benzeneacetaldehyde	1.13	91.05	XIC(91.05Â±500ppm)	1562132	278	284	14.5842 min, 3.734 s	0.143	875
Benzene, n-butyl-	1.12	91.05	XIC(91.05Â±500ppm)	1462028	361	305	15.1676 min, 2.550 s	0.115	905
Phenol, 2-methyl-	1.11	108.06	XIC(108.06Â±500ppm)	2120224	468	753	15.2509 min, 3.181 s	0.127	913
Undecane, 5,7-dimethyl-	0.37	43.08	XIC(43.08Â±500ppm)	351605	300	76	17.0011 min, 1.812 s	0.153	859
3-Pyridinol	1.16	95.06	XIC(95.06Â±500ppm)	4252180	1046	1506	17.4178 min, 3.557 s	0.124	888
2,5-Cyclohexadiene-1,4-dione, 2-ethyl-	1.06	108.08	XIC(108.08Â±500ppm)	1270434	308	947	17.4178 min, 3.841 s	0.132	827
Levoglucosenone	1.12	68.05	XIC(68.05Â±500ppm)	1122118	310	341	17.7511 min, 4.761 s	0.195	836
2,5-Cyclohexadiene-1,4-dione, 2,3-dimethyl-	1.07	54.04	XIC(54.04Â±500ppm)	461412	172	181	18.0845 min, 3.967 s	0.13	810
3-Pyridinol, 2-methyl-	1.16	80.06	XIC(80.06Â±500ppm)	2279749	162	800	18.2512 min, 3.566 s	0.132	881
Benzene, 1-chloro-3-isocyanato-	1.08	153	XIC(153.00Â±500ppm)	1011929	354	549	18.8346 min, 3.244 s	0.108	880
Octane, 2,5,6-trimethyl-	1.38	57.08	XIC(57.08Â±500ppm)	1544869	218	254	19.1679 min, 1.837 s	0.14	807
Phenol, 2,4-dimethyl-	1.31	107.05	XIC(107.05Â±500ppm)	3025182	950	702	19.5013 min, 3.269 s	0.125	906
1,2,3,4-Tetrahydronaphthalene-d12	1.03	112.11	XIC(112.11Â±500ppm)	578888	208	277	19.5846 min, 3.281 s	0.129	745
Benzofuran, 2,3-dihydro-	1.14	91.06	XIC(91.06Â±500ppm)	630699	213	110	19.8346 min, 3.431 s	0.122	756
3-Pyridinol, 6-methyl-	1.31	109.05	XIC(109.05Â±500ppm)	3031060	472	807	19.918 min, 3.515 s	0.125	893
3,4-Dihydroxyphenylglycol, 4TMS derivative	0.93	355.09	XIC(355.09Â±500ppm)	256935508	1065	41394	20.0013 min, 1.557 s	0.328	753
4-Methyl-2,4-bis(p-hydroxyphenyl)pent-1-ene, 2TMS derivative	2.74	207.08	XIC(207.08Â±500ppm)	51255461	200	3121	20.0013 min, 1.612 s	0.228	720
Methyl-a-d-ribofuranoside	1.07	57.05	XIC(57.05Â±500ppm)	20936267	2338	2146	20.0847 min, 5.039 s	0.185	754
Benzoic acid	1.2	105.03	XIC(105.03Â±500ppm)	6811867	955	1154	20.168 min, 3.231 s	0.115	915
Phenol, 4-ethyl-	1.15	107.05	XIC(107.05Â±500ppm)	6789437	620	1236	20.3347 min, 3.289 s	0.116	826
2(1H)-Pyridinone, 1,3-dimethyl-	1.46	123.07	XIC(123.07Â±500ppm)	1710480	268	543	20.3347 min, 3.830 s	0.146	853
Benzene, 1,2,4-trichloro-	1	44.01	XIC(179.94Â±500ppm)	280710	221	303	20.5847 min, 3.337 s	0.106	720
3-Pyridinol, 2,6-dimethyl-	1.34	123.07	XIC(123.07Â±500ppm)	2554675	1392	741	20.7514 min, 3.487 s	0.121	860
1,2-Naphthalenedione	1.23	102.05	XIC(102.05Â±500ppm)	3164409	795	947	21.1681 min, 4.262 s	0.152	894
D-Fucose	1.08	71.05	XIC(71.05Â±500ppm)	2403665	528	583	21.1681 min, 4.475 s	0.158	727
(S)-(+)-2',3'-Dideoxyribonolactone	1.12	85.03	XIC(85.03Â±500ppm)	56864309	1290	8159	21.1681 min, 5.656 s	0.165	941
Phenol, o-amino-	1.28	109.05	XIC(109.05Â±500ppm)	1954375	359	449	21.2514 min, 3.689 s	0.135	717
Phenol, 3-amino-4-methyl-	1.43	122.06	XIC(122.06Â±500ppm)	1473611	545	435	21.7515 min, 3.506 s	0.129	753
5-Methyl-1,3-cyclohexanedione	1.16	69.01	XIC(69.01Â±500ppm)	6570550	1281	1115	21.9181 min, 5.665 s	0.188	768
Catechol	1.01	110.04	XIC(110.04Â±500ppm)	11336020	754	1866	22.0848 min, 3.492 s	0.122	884
2(1H)-Pyridinone, 5-methyl-	1.31	109.05	XIC(109.05Â±500ppm)	1518887	395	359	22.0848 min, 3.706 s	0.136	822
1,4:3,6-Dianhydro-a-d-glucopyranose	1.11	69.04	XIC(69.04Â±500ppm)	35692604	3194	2772	22.0848 min, 4.866 s	0.182	893
1,3-Butadiene, 1,1,2,3,4,4-hexachloro-:2	1.21	44.01	XIC(224.85Â±500ppm)	162629	159	231	22.5015 min, 2.756 s	0.129	782
2,3-Anhydro-d-galactosan	0.35	43.04	XIC(43.04Â±500ppm)	1041867	408	72	22.5849 min, 4.992 s	0.186	789
2,3-Anhydro-d-mannosan	1.05	71.02	XIC(71.02Â±500ppm)	2154785	664	683	22.9182 min, 4.861 s	0.184	825
m-Guaiacol	1.19	124.06	XIC(124.05Â±500ppm)	1626526	562	473	23.1682 min, 3.835 s	0.129	718
5-Hydroxymethylfurfural	1.05	41.06	XIC(41.06Â±500ppm)	2475071	221	127	23.1682 min, 4.659 s	0.138	820
1-Benzofuran-5-ol	1.15	134.04	XIC(134.04Â±500ppm)	2786052	882	1066	23.5849 min, 3.963 s	0.134	910
Pentadecane, 6-methyl-	1.43	57.09	XIC(57.09Â±500ppm)	2259924	771	462	23.7516 min, 1.825 s	0.138	860
1,3-Cyclopentanedione, 2-methyl-	0.99	112.05	XIC(112.05Â±500ppm)	770979	152	213	23.835 min, 4.790 s	0.149	782
2,3-Dioxabicyclo[2.2.1]heptane	1.19	56.05	XIC(56.05Â±500ppm)	2969640	639	409	24.1683 min, 5.531 s	0.207	742
3-Methoxybenzylamine	1.24	136.08	XIC(136.08Â±500ppm)	1072481	475	336	24.2517 min, 3.443 s	0.124	711
1,2-Benzenediol, 3-methoxy-	1.07	125.03	XIC(125.03Â±500ppm)	1701786	373	731	24.5017 min, 4.021 s	0.132	846
1,3-Cyclopentanedione, 2,4-dimethyl-	1.01	111.05	XIC(111.05Â±500ppm)	903278	121	253	24.5017 min, 4.400 s	0.133	722
Benzofuran, 7-methoxy-	1.16	148.05	XIC(148.05Â±500ppm)	1013598	597	722	24.585 min, 4.057 s	0.145	837
2,4(1H,3H)-Pyrimidinedione, dihydro-3-methyl-	1.26	43.06	XIC(43.06Â±500ppm)	5818672	1443	222	24.7517 min, 5.254 s	0.211	731
Methylphosphonic acid, 2TMS derivative	1.09	225.05	XIC(225.05Â±500ppm)	2996019	814	3049	24.9184 min, 2.393 s	0.133	736
1-Naphthalenol	1.13	115.06	XIC(115.06Â±500ppm)	2030500	347	454	25.0017 min, 3.983 s	0.13	864
2,4-Imidazolidinedione, 5,5-dimethyl-	1.11	42.05	XIC(42.05Â±500ppm)	5708670	223	174	25.1684 min, 5.000 s	0.182	725
1H-Inden-1-one, 2,3-dihydro-	1.29	104.06	XIC(104.06Â±500ppm)	1834372	663	492	25.2517 min, 4.677 s	0.163	899
2(3H)-Furanone, 3-acetyldihydro-3-methyl-	1.15	43.04	XIC(43.04Â±500ppm)	8931790	643	314	25.2517 min, 5.516 s	0.206	771
Hydroquinone	1.13	110.04	XIC(110.04Â±500ppm)	61996012	2061	5322	25.3351 min, 4.126 s	0.135	889
Isosorbide	0.55	57.05	XIC(57.05Â±500ppm)	4091714	457	525	25.5018 min, 4.671 s	0.188	722
2-Ethyl-2,3-dihydro-1H-indene	1.21	117.08	XIC(117.08Â±500ppm)	351980	220	124	25.6684 min, 4.238 s	0.168	779
Tetrahydropyran Z-10-dodecenoate	0.91	85.1	XIC(85.10Â±500ppm)	2162441	961	704	25.8351 min, 1.849 s	0.174	766
4-Heptanone, 5,5-diethyl-2,2,3,3-tetramethyl-	0.77	57.09	XIC(57.09Â±500ppm)	18110313	314	1859	25.8351 min, 1.872 s	0.104	790
Resorcinol	1.13	110.04	XIC(110.04Â±500ppm)	53991107	2591	3901	25.8351 min, 3.979 s	0.13	917
Phenol, 4-chloro-3-methyl-	1.12	134.08	XIC(107.05Â±500ppm)	696220	437	198	25.9185 min, 3.552 s	0.116	774
Quinoline	1.72	129.06	XIC(129.06Â±500ppm)	846115	262	304	25.9185 min, 4.422 s	0.16	799
2-Tridecene, (Z)-	0.49	41.06	XIC(41.06Â±500ppm)	4049717	326	193	26.0018 min, 1.956 s	0.073	926
Indolizine	1.1	117.06	XIC(117.06Â±500ppm)	3202668	394	836	26.0018 min, 4.670 s	0.145	752
1,2-Benzenediol, 4-methyl-	1.11	124.06	XIC(124.06Â±500ppm)	2284373	286	561	26.0851 min, 3.547 s	0.113	808
1,3-Di-O-acetyl-a-ÃŸ-d-ribopyranose	1.14	43.04	XIC(43.04Â±500ppm)	8355103	924	466	26.2518 min, 4.090 s	0.158	744
1,2,4-Cyclopentanetriol	1.27	57.05	XIC(57.05Â±500ppm)	1431919	288	285	26.3352 min, 4.816 s	0.182	724
2-Allylphenol	1.15	134.08	XIC(134.08Â±500ppm)	962691	378	439	26.5018 min, 3.510 s	0.126	722
Ethyl 2,3-epoxybutyrate	1.05	45.05	XIC(45.05Â±500ppm)	18238515	625	686	26.5018 min, 5.291 s	0.182	728
Benzaldehyde, 3-hydroxy-	1.18	122.04	XIC(122.04Â±500ppm)	18972022	2059	2650	26.6685 min, 4.099 s	0.133	931
1H-Inden-1-one, 2,3-dihydro-3-methyl-	1.73	131.05	XIC(131.05Â±500ppm)	1568577	494	511	26.9185 min, 4.286 s	0.167	814
3-Methoxy-5-methylphenol	1.16	138.07	XIC(138.07Â±500ppm)	3955766	623	1350	27.2519 min, 3.781 s	0.128	876
2,4-Imidazolidinedione, 5-methyl-	0.84	43.06	XIC(43.06Â±500ppm)	4946531	405	257	27.5019 min, 5.437 s	0.158	916
2-Methylresorcinol, acetate	4.28	124.06	XIC(124.06Â±500ppm)	1015928	272	391	27.6686 min, 3.786 s	0.123	726
Benzofuran, 2-methyl-	1.12	132.06	XIC(132.06Â±500ppm)	1957242	425	561	27.6686 min, 4.107 s	0.133	801
Benzamide, N-hydroxy-	1.34	77.04	XIC(77.04Â±500ppm)	1920076	895	212	27.6686 min, 5.314 s	0.191	715
1,3-Benzenediol, 2-methyl-	1.15	124.05	XIC(124.05Â±500ppm)	9663568	810	1924	27.7519 min, 4.048 s	0.134	920
Argon	0.38	39.97	XIC(39.97Â±500ppm)	727119	372	103	27.7519 min, 6.194 s	0.067	766
Phenol, 4-(2-propenyl)-	1.06	134.08	XIC(134.08Â±500ppm)	610217	201	247	28.002 min, 3.573 s	0.118	810
6-Methyl-4-indanol	1.22	133.07	XIC(133.07Â±500ppm)	1165324	252	277	28.002 min, 3.872 s	0.13	735
2(3H)-Furanone, 5-acetyldihydro-	1.21	85.03	XIC(85.03Â±500ppm)	7372604	1899	1482	28.0853 min, 5.097 s	0.17	804
1(3H)-Isobenzofuranone	1.31	105.04	XIC(105.04Â±500ppm)	2990628	530	535	28.252 min, 5.417 s	0.181	886
1,4-Benzenediol, 2-methyl-	1.16	124.06	XIC(124.06Â±500ppm)	4752023	1139	1201	28.3353 min, 4.158 s	0.135	934
3,7-Dimethyloctyl ethylphosphonofluoridoate	1.68	41.06	XIC(41.06Â±500ppm)	2738982	195	139	28.4187 min, 1.866 s	0.177	703
7-Hydroxy-1-indanone	1.14	148.06	XIC(148.06Â±500ppm)	1600835	451	779	28.502 min, 3.943 s	0.13	771
Benzene, 2,4-diisocyanato-1-methyl-	1.21	174.05	XIC(174.05Â±500ppm)	392197	297	403	28.5853 min, 3.061 s	0.098	866
Orcinol	1.39	124.05	XIC(124.05Â±500ppm)	15911599	1251	2997	28.5853 min, 4.064 s	0.132	841
Ethyne, fluoro-	1.77	44.01	XIC(44.01Â±500ppm)	4051573	118	82	28.6687 min, 3.600 s	0.051	771
1H-Indenol	1.21	132.06	XIC(132.06Â±500ppm)	4238744	605	1025	28.6687 min, 4.139 s	0.135	868
Hydroquinone, 2TMS derivative	1.1	239.06	XIC(239.06Â±500ppm)	875784	447	948	28.8354 min, 2.393 s	0.112	707
Phenol, 2-methoxy-3-(2-propenyl)-	1.09	164.09	XIC(164.09Â±500ppm)	1928493	576	852	28.8354 min, 3.455 s	0.118	878
1,6-Anhydro-3,4-dideoxy-ÃŸ-D-gluco-hexopyranose	1.01	41.06	XIC(41.06Â±500ppm)	4546723	334	205	28.8354 min, 5.626 s	0.215	762
Benzaldehyde, 4-hydroxy-	1.14	121.03	XIC(121.03Â±500ppm)	31330230	1304	3280	29.0854 min, 4.231 s	0.134	913
Benzonitrile, 4-hydroxy-	1.2	119.04	XIC(119.04Â±500ppm)	4091576	619	857	29.1687 min, 3.991 s	0.123	833
Ethanone, 1-(4-ethylphenyl)-	1.17	133.07	XIC(133.07Â±500ppm)	575104	184	177	29.3354 min, 3.415 s	0.112	771
3-Hydroxy-2-methylbenzaldehyde	1.79	136.05	XIC(136.05Â±500ppm)	2925122	495	745	29.4187 min, 4.283 s	0.146	897
L-Proline, 5-oxo-, methyl ester	1.16	84.05	XIC(84.05Â±500ppm)	11915962	1582	1839	29.5021 min, 5.158 s	0.167	827
2-Methoxyresorcinol	0.4	125.03	XIC(125.03Â±500ppm)	502097	124	255	29.6688 min, 4.226 s	0.122	709
Vinyl 2-ethylhexanoate	1.17	57.05	XIC(57.05Â±500ppm)	8447490	1380	1007	29.6688 min, 5.043 s	0.174	701
1,3-Benzenediol, 2,5-dimethyl-	1.18	138.07	XIC(138.07Â±500ppm)	3317909	416	930	29.7521 min, 4.147 s	0.133	848
7-Methyl-1-naphthol	1.34	158.08	XIC(158.08Â±500ppm)	408757	179	276	29.8354 min, 4.182 s	0.141	797
1,3,5-Triazine-2,4,6(1H,3H,5H)-trione, 1,3,5-trimethyl-	1.47	58.05	XIC(58.05Â±500ppm)	76672612	5665	3802	29.8354 min, 4.614 s	0.168	942
1H-2-Benzopyran-1-one, 3,4-dihydro-	1.12	148.06	XIC(148.06Â±500ppm)	506096	265	203	29.8354 min, 5.038 s	0.165	719
Hydroquinone, acetate	1.19	110.04	XIC(110.04Â±500ppm)	5391583	716	1043	29.9188 min, 4.080 s	0.128	847
Methyl-2-O-methylÃŸl-arabinopyranoside	1.1	74.04	XIC(74.04Â±500ppm)	2524777	485	552	29.9188 min, 4.872 s	0.176	733
1,1,4,5,6-Pentamethyl-2,3-dihydro-1H-indene	1.02	173.1	XIC(173.10Â±500ppm)	518654	266	566	30.0855 min, 2.997 s	0.108	744
4-Ethylcatechol	1.12	123.05	XIC(123.05Â±500ppm)	2832076	394	723	30.1688 min, 3.536 s	0.112	796
Naphthalene, 2-ethyl-	0.94	141.07	XIC(141.07Â±500ppm)	506436	223	249	30.1688 min, 3.630 s	0.116	718
4-Hydroxy-3-methylbenzaldehyde	1.19	135.05	XIC(135.05Â±500ppm)	10847435	1312	1652	30.4188 min, 4.117 s	0.13	864
Ethanone, 1-(3-hydroxyphenyl)-	1.14	121.03	XIC(121.03Â±500ppm)	16128002	1955	2793	30.5022 min, 4.222 s	0.138	885
Vanillin	1.14	151.05	XIC(151.05Â±500ppm)	43382562	1715	4324	30.5022 min, 4.583 s	0.148	936
Benzene, (cyclohexylmethyl)-	1.06	92.06	XIC(92.06Â±500ppm)	495521	153	120	30.5855 min, 3.070 s	0.108	778
1,3-Isobenzofurandione, 4-methyl-	1.1	90.05	XIC(90.05Â±500ppm)	1129570	294	422	30.6688 min, 4.698 s	0.142	895
1,4-Naphthalenedione	1.15	158.04	XIC(158.04Â±500ppm)	1345466	287	616	30.8355 min, 5.077 s	0.154	775
5-(2-Aminopropyl)-2-methylphenol	1.5	44.01	XIC(44.01Â±500ppm)	3876673	120	83	30.9189 min, 3.591 s	0.05	740
2-Methyl-5-hydroxybenzofuran	1.02	147.05	XIC(147.05Â±500ppm)	3083102	550	836	30.9189 min, 3.958 s	0.16	735
5-Hydroxy-2-methylbenzaldehyde	1.15	107.05	XIC(107.05Â±500ppm)	2088539	309	496	31.0022 min, 4.177 s	0.124	890
Phenol, 5-methoxy-2,3-dimethyl-	1.25	152.09	XIC(152.09Â±500ppm)	2219638	533	578	31.0855 min, 3.701 s	0.125	821
5-Methyl-2-allylphenol	1.18	148.09	XIC(148.09Â±500ppm)	419931	182	174	31.3356 min, 3.531 s	0.11	791
1H-Isoindole-1,3(2H)-dione, 2-methyl-	1.3	161.05	XIC(161.05Â±500ppm)	1061234	559	342	31.3356 min, 4.835 s	0.167	816
Benzoic acid, 4-methoxy-	1.14	135.05	XIC(135.05Â±500ppm)	10931471	1071	1335	31.4189 min, 3.861 s	0.122	775
4-Hydroxy-2-methylacetophenone	0.41	135.05	XIC(135.05Â±500ppm)	1057808	156	236	31.5856 min, 4.174 s	0.13	780
Benzoic acid, 3-hydroxy-, methyl ester	1.22	121.03	XIC(121.03Â±500ppm)	13740444	1038	1976	31.6689 min, 3.925 s	0.128	885
Ethyl-2-benzofuran	1.07	131.05	XIC(131.05Â±500ppm)	2051549	424	444	31.9189 min, 4.042 s	0.133	783
Coumarin	1.58	118.05	XIC(118.05Â±500ppm)	2241020	874	516	32.0023 min, 5.304 s	0.186	863
3,5-Dimethoxybenzaldehyde	1.05	166.07	XIC(166.07Â±500ppm)	541888	238	285	32.0856 min, 4.202 s	0.141	750
4-Methylphthalic anhydride	1.08	118.05	XIC(118.05Â±500ppm)	2399975	401	514	32.0856 min, 4.725 s	0.15	839
Orcinol, 2TMS derivative	1.04	253.08	XIC(253.08Â±500ppm)	640106	379	589	32.169 min, 2.374 s	0.101	758
Acetophenone, 4'-hydroxy-	1.16	121.03	XIC(121.03Â±500ppm)	15806542	1793	2203	32.3356 min, 4.347 s	0.139	909
Acenaphthylene	1.09	152.07	XIC(152.06Â±500ppm)	4122944	487	893	32.3356 min, 4.434 s	0.142	902
5-Isopropyl-2,4-imidazolidinedione	1.12	100.03	XIC(100.03Â±500ppm)	21154239	1754	3443	32.5023 min, 4.940 s	0.164	910
Phenol, 2-methoxy-4-(1-propenyl)-	1.16	164.09	XIC(164.09Â±500ppm)	8675426	1860	2338	32.669 min, 3.617 s	0.119	919
p-Hydroxyphenylacetone	1.12	107.05	XIC(107.05Â±500ppm)	8013336	1622	1778	32.669 min, 4.408 s	0.14	900
Methylparaben	1.19	121.03	XIC(121.03Â±500ppm)	103743271	2705	6144	33.0024 min, 4.022 s	0.128	941
1-Naphthalenol, 5,8-dihydro-	1.22	146.08	XIC(146.08Â±500ppm)	1819375	329	484	33.0024 min, 4.062 s	0.148	763
Phenol, 2-methoxy-4-propyl-	1.19	137.06	XIC(137.06Â±500ppm)	4572264	754	1233	33.0024 min, 4.412 s	0.146	837
o-Cyanobenzoic acid	1.16	76.04	XIC(76.04Â±500ppm)	8827369	804	1074	33.0024 min, 5.219 s	0.17	938
Phenol, TMS derivative	1.98	151.08	XIC(151.08Â±500ppm)	451720	262	165	33.2524 min, 3.499 s	0.112	763
Benzene, octyl-	1.13	92.06	XIC(92.06Â±500ppm)	635762	202	180	33.3357 min, 2.521 s	0.079	854
3,5-Dimethyl-4-hydroxybenzaldehyde	1.28	149.06	XIC(149.06Â±500ppm)	1889760	593	572	33.3357 min, 4.438 s	0.149	884
1,3-Benzenediol, 4,5-dimethyl-	1.06	123.05	XIC(123.05Â±500ppm)	6980170	681	1491	33.5024 min, 3.957 s	0.125	818
Oxalic acid, bis(2-ethylhexyl) ester	0.36	57.09	XIC(57.09Â±500ppm)	2501718	410	589	33.5857 min, 2.014 s	0.086	778
6-Methoxy-3-methylbenzofuran	1.11	162.08	XIC(162.08Â±500ppm)	43829502	4080	4093	33.6691 min, 4.190 s	0.153	736
ÃŸ-D-Glucopyranose, 1,6-anhydro-	0.98	60.04	XIC(60.04Â±500ppm)	251978602	8930	9616	33.6691 min, 5.513 s	0.193	900
Acenaphthene	1.05	154.08	XIC(153.07Â±500ppm)	677314	369	246	33.8358 min, 4.253 s	0.17	779
1,1'-Biphenyl, 3-methyl-	0.99	168.1	XIC(168.10Â±500ppm)	527193	203	278	33.9191 min, 3.697 s	0.119	779
3-Pyrazolidinone, 1,4-dimethyl	1.23	114.04	XIC(114.04Â±500ppm)	2319106	773	699	33.9191 min, 4.305 s	0.148	702
4-Hydroxy-3-methylacetophenone	1.16	135.05	XIC(135.05Â±500ppm)	4729192	676	849	34.0858 min, 4.142 s	0.138	863
Apocynin	1.14	151.05	XIC(151.05Â±500ppm)	48382277	1911	4482	34.0858 min, 4.436 s	0.142	881
1-Naphthalenecarbonitrile	1.76	153.06	XIC(153.06Â±500ppm)	2853233	562	674	34.2525 min, 4.788 s	0.171	848
Paroxypropione	1.18	121.03	XIC(121.03Â±500ppm)	4985400	825	1119	34.3358 min, 4.050 s	0.13	919
2-Methoxy-4-formyl-5-methylphenol	1.1	166.07	XIC(166.07Â±500ppm)	2611111	350	670	34.5025 min, 4.305 s	0.134	793
2H-1-Benzopyran-2-one, 3-methyl-	1.56	131.06	XIC(131.06Â±500ppm)	826498	232	208	34.5858 min, 4.788 s	0.169	729
3-Methoxy-5-propylphenol	1.26	138.07	XIC(138.07Â±500ppm)	1856197	292	505	34.6692 min, 3.548 s	0.117	824
Ethanone, 1-(2,5-dihydroxyphenyl)-	1.1	137.03	XIC(137.03Â±500ppm)	4262270	442	1017	34.9192 min, 4.391 s	0.137	846
3-Hydroxybenzhydrazide	1.09	121.03	XIC(121.03Â±500ppm)	1917525	296	454	35.0025 min, 4.080 s	0.128	715
Menadione	1.08	172.06	XIC(172.06Â±500ppm)	1261957	442	664	35.0859 min, 4.707 s	0.152	867
4-Hydroxy-3-methylbenzoic acid, methyl ester	2.3	135.05	XIC(135.05Â±500ppm)	4286231	342	784	35.2525 min, 3.877 s	0.124	901
Naphthalene, 1-isocyano-	1.82	153.06	XIC(153.06Â±500ppm)	3077623	483	681	35.2525 min, 4.857 s	0.17	921
2H-1-Benzopyran-2-one, 3,4-dihydro-6-hydroxy-	1.12	122.04	XIC(122.04Â±500ppm)	11325040	2954	1852	35.2525 min, 5.086 s	0.163	811
Resorcinol, 2-acetyl-	1.18	137.06	XIC(137.06Â±500ppm)	2965614	591	833	35.3359 min, 3.905 s	0.124	784
Benzoic acid, 4-hydroxy-3-methoxy-, methyl ester	1.12	151.04	XIC(151.04Â±500ppm)	6990447	717	1312	35.3359 min, 4.115 s	0.13	887
2-Propanone, 1-(4-methoxyphenyl)-	0.98	121.07	XIC(121.07Â±500ppm)	3211441	408	659	35.3359 min, 4.268 s	0.132	748
4-Chromanol	1.08	150.07	XIC(150.07Â±500ppm)	832778	151	341	35.5859 min, 4.204 s	0.139	741
2(3H)-Benzoxazolone	1.19	135.04	XIC(135.04Â±500ppm)	3337443	580	604	35.5859 min, 5.086 s	0.165	906
1,3,5-Triazine-2,4,6-triamine	1.23	43.05	XIC(43.05Â±500ppm)	34246649	687	1131	35.5859 min, 5.671 s	0.197	928
Dodecanoic acid, methyl ester	1.23	74.04	XIC(74.04Â±500ppm)	402259	157	114	35.7526 min, 2.312 s	0.075	853
Benzene, 1,2,3-trimethoxy-5-methyl-	1.13	167.08	XIC(167.08Â±500ppm)	40718315	2732	5870	35.7526 min, 3.750 s	0.127	766
2,4(1H,3H)-Pyrimidinedione, dihydro-6-(hydroxymethyl)-1,3-dimethyl-	1.33	42.05	XIC(42.05Â±500ppm)	7211865	330	239	35.9193 min, 2.174 s	0.186	775
2-Propanone, 1-(4-hydroxy-3-methoxyphenyl)-	1.12	137.06	XIC(137.06Â±500ppm)	98733170	3450	7704	35.9193 min, 4.302 s	0.142	853
Benzoic acid, 2-(cyanomethyl)-	1.22	161.05	XIC(161.05Â±500ppm)	3077166	669	727	36.2526 min, 4.909 s	0.162	720
2,4-Imidazolidinedione, 5-(2-methylpropyl)-, (S)-	2.02	100.03	XIC(100.03Â±500ppm)	17732318	1950	3252	36.4193 min, 4.603 s	0.161	870
Tetradecane, 4-ethyl-	2.42	57.09	XIC(57.09Â±500ppm)	1797710	977	270	36.5026 min, 1.860 s	0.132	830
1H-Indene, 2,3-dihydro-1,4,7-trimethyl-	1.27	145.07	XIC(145.07Â±500ppm)	2257340	193	510	36.586 min, 3.990 s	0.163	763
Cyclohexane, propyl-	0.25	83.09	XIC(83.09Â±500ppm)	968558	217	327	36.6693 min, 2.120 s	0.074	787
Benzofuran, 5-methoxy-6,7-dimethyl-	1.2	161.07	XIC(161.07Â±500ppm)	1024293	433	358	36.6693 min, 3.700 s	0.129	761
2H-1-Benzopyran-2-one, 6-methyl-	2.93	132.06	XIC(132.06Â±500ppm)	677527	182	185	36.7527 min, 4.980 s	0.183	798
6H-Purin-6-one, 1,7-dihydro-1,7-dimethyl-	2.1	164.07	XIC(164.07Â±500ppm)	18250550	676	1583	36.836 min, 5.419 s	0.187	767
1H-Tetrazole	1.53	42.05	XIC(42.05Â±500ppm)	7691512	322	302	36.836 min, 6.103 s	0.214	734
1,4-Benzenediol, 2,3,5-trimethyl-	0.41	123.05	XIC(123.05Â±500ppm)	733050	126	260	36.9193 min, 4.085 s	0.132	754
2H-1-Benzopyran-2-one, 8-hydroxy-	1.09	134.04	XIC(134.04Â±500ppm)	10480502	1750	1481	36.9193 min, 5.239 s	0.167	910
1,3-Benzenediol, 5-pentyl-	1.18	124.06	XIC(124.06Â±500ppm)	2178179	411	640	37.0027 min, 3.824 s	0.122	738
1H-Inden-1-one, 2,3-dihydro-3,3-dimethyl-	1.34	145.07	XIC(145.07Â±500ppm)	2190939	482	468	37.086 min, 4.000 s	0.137	761
Ethanone, 1-(3,4-dimethoxyphenyl)-	0.4	165.06	XIC(165.06Â±500ppm)	6870614	406	1119	37.2527 min, 4.407 s	0.141	905
2,6-Dimethoxybenzoquinone	1.05	69.02	XIC(69.02Â±500ppm)	20548658	3878	1582	37.2527 min, 5.851 s	0.186	924
3-Methoxy-4,5-methylenedioxybenzaldehyde	0.43	43.04	XIC(43.04Â±500ppm)	1203538	207	80	37.4194 min, 4.776 s	0.15	781
Fluorene	1.14	166.08	XIC(166.08Â±500ppm)	3217755	366	915	37.5861 min, 4.273 s	0.13	787
4-(1-Hydroxyallyl)-2-methoxyphenol	1.08	137.06	XIC(137.06Â±500ppm)	3803041	612	784	37.5861 min, 4.357 s	0.14	867
Homophthalimide	1.19	161.05	XIC(161.05Â±500ppm)	3010113	707	577	37.5861 min, 4.987 s	0.162	819
Phenol, 4-[(5,6,7,8-tetrahydro-6-methyl-1,3-dioxolo[4,5-g]isoquinolin-5-yl)methyl]-, (R)-	1.81	190.06	XIC(190.06Â±500ppm)	637466	168	447	37.6694 min, 2.809 s	0.084	702
1-Propanone, 1-(4-hydroxy-3-methoxyphenyl)-	1.43	151.04	XIC(151.04Â±500ppm)	18807051	552	2734	37.8361 min, 4.178 s	0.164	770
Butyrovanillone	1.1	151.04	XIC(151.04Â±500ppm)	8898546	833	1337	38.0861 min, 4.176 s	0.132	882
2H-1-Benzopyran-2-one, 4-methyl-	1.37	131.06	XIC(131.06Â±500ppm)	1276049	204	273	38.0861 min, 5.264 s	0.176	840
1,6:2,3-Dianhydro-4-O-acetyl-ÃŸ-d-gulopyranose	1.02	43.04	XIC(43.04Â±500ppm)	19486544	556	627	38.1694 min, 4.728 s	0.146	711
1-Methylenespiro[2.4]heptan-4-one	1.21	79.06	XIC(79.06Â±500ppm)	2304345	332	283	38.2528 min, 6.307 s	0.208	744
Benzoic acid, 3,4-dimethoxy-, methyl ester	2.97	165.06	XIC(165.06Â±500ppm)	794730	182	304	38.3361 min, 4.134 s	0.151	718
Cyclohexane, 1,2,3,4,5,6-hexaethyl-	0.55	57.09	XIC(57.09Â±500ppm)	1745701	154	257	38.5028 min, 1.975 s	0.109	713
2',4'-Dihydroxy-3'-methylacetophenone	1.03	151.05	XIC(151.05Â±500ppm)	962084	205	319	38.5028 min, 4.300 s	0.13	728
Oxazole, 2,4-dimethyl-	0.84	97.06	XIC(97.06Â±500ppm)	2923413	350	498	38.6695 min, 2.129 s	0.236	749
4-Hydroxy-1-indanone	1.11	91.06	XIC(91.06Â±500ppm)	8275906	1837	597	38.6695 min, 5.122 s	0.169	891
3H-Imidazo[4,5-b]pyridine-2-ethanamine, 3-methyl-	1.82	147.08	XIC(147.08Â±500ppm)	4934373	607	796	38.6695 min, 5.970 s	0.204	748
[1,4']Bipiperidinyl-4'-carboxamide, 1'-(4-chlorobenzenesulfonyl)-	1.03	341.03	XIC(341.03Â±500ppm)	327927	104	455	38.7528 min, 1.504 s	0.089	740
4-Undecene, 3-methyl-, (Z)-	2.98	55.07	XIC(55.07Â±500ppm)	1230297	121	109	38.7528 min, 1.935 s	0.184	711
Phenol, 2,6-dimethoxy-4-(2-propenyl)-	1.14	194.1	XIC(194.10Â±500ppm)	20001398	2650	3599	38.7528 min, 3.776 s	0.126	912
Benzaldehyde, 3,4,5-trimethoxy-	1.29	196.08	XIC(196.08Â±500ppm)	4445140	686	1566	38.7528 min, 4.318 s	0.147	850
1-Naphthalenol, 2-methyl-	1.06	158.08	XIC(158.08Â±500ppm)	12999154	583	2106	38.9195 min, 4.381 s	0.145	913
3H,4H-3-Methylpyrro(1,2-D)(1,2,4)triazin-4-one	1.26	149.06	XIC(149.06Â±500ppm)	2410208	480	568	38.9195 min, 5.507 s	0.176	711
p-Methoxybenzamide	1.39	135.05	XIC(135.05Â±500ppm)	1110468	298	236	38.9195 min, 5.595 s	0.182	771
Homosyringaldehyde	1.12	167.08	XIC(167.08Â±500ppm)	17284545	1804	3247	39.0028 min, 3.567 s	0.117	811
Phenol, 3,4,5-trimethoxy-	1.27	169.05	XIC(169.05Â±500ppm)	922096	338	370	39.0028 min, 4.422 s	0.149	773
1-Naphthalenecarboxamide, 8-hydroxy-N,N-dimethyl-	0.64	44.01	XIC(44.01Â±500ppm)	1336779	191	38	39.0862 min, 5.157 s	0.153	701
1H-Inden-1-one, 2,3-dihydro-7-hydroxy-3-methyl-	1.09	147.05	XIC(147.05Â±500ppm)	5534050	625	801	39.3362 min, 4.676 s	0.158	823
2H-1-Benzopyran-2-one, 4,7-dihydroxy-	1.12	136.06	XIC(136.06Â±500ppm)	1423055	288	472	39.3362 min, 4.848 s	0.149	712
Ethanone, 1,1'-(1,4-phenylene)bis-	1.17	147.05	XIC(147.05Â±500ppm)	3715508	255	549	39.5029 min, 4.671 s	0.165	804
6-Hydroxy-4-methylcoumarin	1.19	176.05	XIC(176.05Â±500ppm)	4111387	365	972	39.6696 min, 4.771 s	0.141	831
3(2H)-Benzofuranone, 4,7-dimethyl-	1.1	162.07	XIC(162.07Â±500ppm)	8718034	1019	1498	39.7529 min, 4.940 s	0.161	814
Benzene, 3-ethyl-1,2,4,5-tetramethyl-	1.07	158.08	XIC(158.08Â±500ppm)	19949751	680	2259	39.9196 min, 4.579 s	0.142	705
Methyleugenol	1.31	178.1	XIC(178.10Â±500ppm)	535817	193	221	40.0029 min, 3.709 s	0.119	734
2H-Benzimidazol-2-one, 1,3-dihydro-1-methyl-	1.39	148.07	XIC(148.07Â±500ppm)	7092496	1836	1448	40.0863 min, 5.582 s	0.181	870
3-Ethoxybenzhydrazide	2.77	149.06	XIC(149.06Â±500ppm)	1050828	206	297	40.1696 min, 3.959 s	0.122	749
1,5-Benzoxazepine, 2,3,4,5-tetrahydro-	1.52	149.06	XIC(149.06Â±500ppm)	4596702	609	739	40.2529 min, 5.593 s	0.182	731
Benzenepropanol, 4-hydroxy-3-methoxy-	1.1	137.06	XIC(137.06Â±500ppm)	26889846	1970	3153	40.3363 min, 4.175 s	0.131	893
2-Pyrrolidinophenol	1.78	163.08	XIC(163.08Â±500ppm)	54091833	3234	2626	40.3363 min, 5.854 s	0.201	751
1(2H)-Acenaphthylenone	1.16	140.07	XIC(140.07Â±500ppm)	4423570	1842	1120	40.4196 min, 5.138 s	0.171	856
Benzene, 1,2,3-trimethoxy-5-(1-propenyl)-, (E)-	1.4	193.09	XIC(193.09Â±500ppm)	570592	233	278	40.503 min, 3.610 s	0.12	796
Benzofuran, 2,3-dihydro-2,2,4,6-tetramethyl-	1.95	161.07	XIC(161.07Â±500ppm)	3543382	602	737	40.503 min, 4.491 s	0.147	718
2,6-Dimethoxyhydroquinone	1.13	170.06	XIC(170.06Â±500ppm)	1014948	402	457	40.5863 min, 4.854 s	0.153	825
2-Naphthalenol, 3-methoxy-	1.31	131.06	XIC(131.06Â±500ppm)	2289457	762	435	40.6696 min, 4.561 s	0.156	900
Propiophenone, 3',4'-dimethoxy-	1.22	165.06	XIC(165.06Â±500ppm)	1761988	785	339	40.753 min, 4.116 s	0.135	864
Dodecane, 2-methyl-	3.2	57.09	XIC(57.09Â±500ppm)	2725051	351	415	40.9197 min, 1.860 s	0.076	822
Tridecanoic acid	1.13	60.04	XIC(60.04Â±500ppm)	776219	155	153	40.9197 min, 2.354 s	0.071	809
(E)-4-(3-Hydroxyprop-1-en-1-yl)-2-methoxyphenol	0.93	137.06	XIC(137.06Â±500ppm)	4198410	467	788	41.1697 min, 4.332 s	0.132	878
Benzo[b]thiophene, 2,5,7-trimethyl-	2.49	176.1	XIC(176.10Â±500ppm)	2937002	368	718	41.253 min, 4.637 s	0.165	706
2-Allyl-1,4-dimethoxy-3-methyl-benzene	1.13	192.08	XIC(192.08Â±500ppm)	12256028	2249	2348	41.3364 min, 4.335 s	0.143	739
1,3-Propanediol, 2-dodecyl	1.03	43.07	XIC(43.07Â±500ppm)	1477576	165	113	41.4197 min, 2.298 s	0.068	885
Anthracene, 1,2,3,4-tetrahydro-9,10-dimethyl-	1.04	195.12	XIC(195.12Â±500ppm)	638623	140	253	41.4197 min, 3.468 s	0.113	775
Methyl 3-(4-hydroxy-3-methoxyphenyl)propanoate	1.11	137.06	XIC(137.06Â±500ppm)	5177509	507	1010	41.503 min, 3.922 s	0.12	795
Ethanone, 1-(3,4,5-trimethoxyphenyl)-	1.37	195.07	XIC(195.07Â±500ppm)	6232267	3259	1447	41.5864 min, 4.120 s	0.14	889
2-Propenal, 3-(3,4-dimethoxyphenyl)-	1.15	192.08	XIC(192.08Â±500ppm)	4525582	1096	1053	41.5864 min, 4.343 s	0.144	713
9H-Fluorene, 4-methyl-	1.79	165.08	XIC(165.08Â±500ppm)	924585	231	270	41.8364 min, 3.995 s	0.126	878
5,6,7,8-Tetrahydro-6-oxopteridine	1.14	150.06	XIC(150.06Â±500ppm)	2469408	381	431	41.8364 min, 5.692 s	0.186	753
2H-1-Benzopyran-2-one, 8-methoxy-	1.6	176.05	XIC(176.05Â±500ppm)	3409958	529	472	41.9197 min, 5.343 s	0.184	837
Benzo[f]quinoline	0.7	179.08	XIC(179.08Â±500ppm)	1339554	134	365	42.2531 min, 4.336 s	0.159	747
3-Hydroxybiphenyl	1.24	170.08	XIC(170.08Â±500ppm)	8064482	917	1590	42.2531 min, 4.365 s	0.139	879
6-Ethyl-4,7-dimethyl-2,3-benzofurandione	2.76	176.09	XIC(176.09Â±500ppm)	1639172	180	539	42.3364 min, 4.774 s	0.16	711
2(3H)-Benzofuranone, 3,3-dimethyl-	0.98	162.07	XIC(162.07Â±500ppm)	2358195	249	590	42.3364 min, 4.838 s	0.156	777
1,4-diazabicyclo[4.3.0]nonan-2,5-dione, 3-methyl	0.75	70.07	XIC(70.07Â±500ppm)	1733070	329	308	42.3364 min, 6.290 s	0.209	841
9H-Fluorene, 9-methyl-	0.93	165.07	XIC(165.07Â±500ppm)	574705	106	158	42.5031 min, 4.200 s	0.119	733
Sulfurous acid, 2-ethylhexyl hexadecyl ester	1.08	57.09	XIC(57.09Â±500ppm)	2582551	162	464	42.5865 min, 1.856 s	0.083	842
p-Hydroxybiphenyl	1.15	170.08	XIC(170.08Â±500ppm)	7012788	822	1544	42.5865 min, 4.433 s	0.137	847
Benzaldehyde, 2-hydroxy-3-(2-propenyl)-	1.18	134.08	XIC(134.08Â±500ppm)	3063891	932	809	42.6698 min, 4.812 s	0.157	808
1,4-Methanonaphthalene-5,8-diol, 1,2,3,4-tetrahydro-	1.23	148.06	XIC(148.06Â±500ppm)	1824918	365	498	42.7531 min, 4.399 s	0.145	758
2-Hydrazino-6-methoxymethyl-4-methyl-nicotinonitrile	1.25	162.08	XIC(162.08Â±500ppm)	1886054	367	430	42.7531 min, 5.142 s	0.167	748
methyl 4-methylnaphthalen-1-yl ether	1.07	157.07	XIC(157.07Â±500ppm)	3737367	410	603	42.9198 min, 4.280 s	0.177	720
3,4,5-trimethoxyphenyl-2-propanone	1.24	181.09	XIC(181.09Â±500ppm)	5481578	1423	1355	43.0032 min, 4.049 s	0.137	884
Benzene, ethylpentamethyl-	0.85	161.06	XIC(161.06Â±500ppm)	1322217	164	348	43.0032 min, 4.376 s	0.137	733
1H-Inden-1-one, 2,3-dihydro-5-methoxy-	1.25	162.07	XIC(162.07Â±500ppm)	1701999	359	448	43.0032 min, 4.761 s	0.16	767
Benzoic acid, 3,4,5-trimethoxy-, methyl ester	1.43	226.09	XIC(226.09Â±500ppm)	646871	480	584	43.0865 min, 3.901 s	0.131	757
4-Cyclohepta-2,4,6-trienyl-phenol	1.08	184.09	XIC(184.09Â±500ppm)	590393	213	224	43.0865 min, 4.112 s	0.153	717
Methyl tetradecanoate	1.32	74.04	XIC(74.04Â±500ppm)	692525	240	199	43.1698 min, 2.231 s	0.067	802
Decanamide, N-(2-hydroxyethyl)-	1.04	85.06	XIC(85.06Â±500ppm)	757376	336	312	43.2532 min, 2.604 s	0.08	785
9H-Fluoren-9-one	1.42	180.06	XIC(180.06Â±500ppm)	19161343	2935	2459	43.2532 min, 4.756 s	0.156	947
Naphtho[2,1-b]furan, 1,2-dimethyl-	1.11	196.09	XIC(196.09Â±500ppm)	746195	261	231	43.4199 min, 3.720 s	0.116	731
Benzofuran, 3-methyl-2-(1-methylethenyl)-	2.68	172.09	XIC(172.09Â±500ppm)	9109402	584	1255	43.5032 min, 4.239 s	0.144	780
4-((1E)-3-Hydroxy-1-propenyl)-2-methoxyphenol	1.09	137.06	XIC(137.06Â±500ppm)	10411158	1060	1571	43.5032 min, 4.370 s	0.134	831
1-Naphthol, 6,7-dimethyl-	2.65	172.09	XIC(172.09Â±500ppm)	3956243	422	950	43.7532 min, 4.250 s	0.141	758
Pyrrolo[1,2-a]pyrazine-1,4-dione, hexahydro-	0.78	83.08	XIC(83.08Â±500ppm)	3742624	140	487	43.8366 min, 2.074 s	0.259	838
5,6-Dimethyl-2-benzimidazolinone	1.06	162.08	XIC(162.08Â±500ppm)	2476044	304	449	43.8366 min, 5.085 s	0.181	732
Phenol, pentachloro-	1.26	265.85	XIC(265.85Â±500ppm)	325605	193	393	44.0032 min, 3.921 s	0.115	803
2,5-Dimethoxy-ÃŸ-nitrostyrene	1.3	91.06	XIC(91.06Â±500ppm)	995234	703	110	44.1699 min, 3.642 s	0.114	718
2-Dibenzofuranol	1.15	184.06	XIC(184.06Â±500ppm)	5095274	984	1497	44.1699 min, 4.453 s	0.139	871
3,4-Dihydrocoumarin, 7,8-dimethyl-	1.12	176.09	XIC(176.09Â±500ppm)	2041170	441	657	44.1699 min, 4.656 s	0.155	756
6-Methoxy-4-methylcoumarin	1.56	190.07	XIC(190.07Â±500ppm)	1646204	430	569	44.2533 min, 4.749 s	0.161	727
3-Allyl-6-methoxyphenol	1.14	137.07	XIC(137.07Â±500ppm)	1354609	244	207	44.7533 min, 3.627 s	0.112	724
Syringylacetone	1.09	167.07	XIC(167.07Â±500ppm)	312132675	5523	10269	44.7533 min, 4.326 s	0.155	860
5-acenaphthylenecarbonitrile	0.41	177.06	XIC(177.06Â±500ppm)	1759758	320	416	44.7533 min, 4.938 s	0.169	812
1-(2,4,5-Trimethoxyphenyl)propan-1-one	2.02	195.07	XIC(195.07Â±500ppm)	3940205	871	1013	44.8366 min, 3.750 s	0.129	779
Benzoic acid, 4-hydroxy-3,5-dimethoxy-, hydrazide	1.28	181.06	XIC(181.06Â±500ppm)	13983546	1369	1694	44.8366 min, 4.199 s	0.136	809
9H-Fluorene, 9-methylene-	1.24	178.08	XIC(178.08Â±500ppm)	13435525	3750	2260	45.0033 min, 4.556 s	0.147	935
Acridine	0.59	179.08	XIC(179.08Â±500ppm)	3642410	229	700	45.0033 min, 4.866 s	0.136	865
2-Methylthio-5-nitro anisole	1.06	199.05	XIC(199.05Â±500ppm)	12099163	1274	3103	45.42 min, 4.534 s	0.138	716
6-Methoxychroman-2-one	0.94	136.05	XIC(136.05Â±500ppm)	1144395	168	315	45.5867 min, 5.061 s	0.145	708
3,5-Dimethoxycinnamic acid	1.22	208.12	XIC(208.12Â±500ppm)	705340	244	275	45.67 min, 3.550 s	0.116	713
4-Methyl-2-phenylphenol	1.37	184.09	XIC(184.09Â±500ppm)	1541732	466	597	45.67 min, 4.066 s	0.132	760
2-Methyltetradecan-2-ol	1.1	59.07	XIC(59.07Â±500ppm)	2179887	299	597	45.8367 min, 2.132 s	0.063	746
Phenol, 2-(phenylmethyl)-	1.25	184.09	XIC(184.09Â±500ppm)	1413022	980	470	45.9201 min, 4.029 s	0.136	709
Cyclo(L-prolyl-L-valine)	1.05	70.07	XIC(70.07Â±500ppm)	2930615	288	376	45.9201 min, 5.174 s	0.152	864
Naphtho[1,2-b]furan-4,5-dione	0.49	44.01	XIC(44.01Â±500ppm)	1342195	375	33	46.0034 min, 5.316 s	0.166	743
Pyrazolo[3,4-b]pyridin-6-one, 1,7-dihydro-1,3,4-trimethyl-	1.58	177.09	XIC(177.09Â±500ppm)	35938904	2343	2303	46.0867 min, 5.493 s	0.184	817
Benzen, 2-acetate-1,3-dimethoxy-5-(1-propenyl)-	1.42	194.1	XIC(194.10Â±500ppm)	2274136	602	767	46.1701 min, 3.712 s	0.133	784
Anthrone	1.45	194.08	XIC(194.08Â±500ppm)	1294119	343	502	46.1701 min, 4.377 s	0.147	861
Benzo[g]isoquinoline	2.87	179.08	XIC(179.08Â±500ppm)	5415732	443	678	46.1701 min, 4.935 s	0.223	881
2H-1-Benzopyran-2-one, 6-hydroxy-	0.91	134.04	XIC(134.04Â±500ppm)	1849916	190	333	46.2534 min, 5.478 s	0.165	836
1,4,5,7-Tetramethyl-furo[3,4-d]pyridazine	1.31	176.09	XIC(176.09Â±500ppm)	2111494	158	354	46.4201 min, 4.603 s	0.161	725
Benzeneacetic acid, 4-hydroxy-3,5-dimethoxy-, methyl ester	1.15	167.08	XIC(167.08Â±500ppm)	2906217	486	808	46.5034 min, 4.146 s	0.133	765
1-Propanone, 1-(4-hydroxy-3,5-dimethoxyphenyl)-	1.27	181.06	XIC(181.06Â±500ppm)	66038090	2144	5522	46.5868 min, 4.050 s	0.147	848
1H-[1]Pyrindine-3-carbonitrile, 4-ethyl-2-oxo-2,5,6,7-tetrahydro-	1.48	188.07	XIC(188.07Â±500ppm)	1129348	333	297	46.5868 min, 5.460 s	0.177	765
9H-Carbazole-9-methanol	1.15	167.08	XIC(167.08Â±500ppm)	13420100	1559	1911	46.7535 min, 4.987 s	0.157	887
Neophytadiene	1.04	68.07	XIC(68.07Â±500ppm)	549603	168	156	47.0868 min, 1.899 s	0.062	870
Caffeine	1.56	194.08	XIC(194.08Â±500ppm)	1220495	372	291	47.0868 min, 5.258 s	0.178	792
Butylsyringone	1.46	181.06	XIC(181.06Â±500ppm)	617316	194	198	47.3368 min, 3.752 s	0.13	725
Xanthone	1.69	196.06	XIC(196.06Â±500ppm)	3010137	712	823	47.4202 min, 4.682 s	0.158	827
1H-Indene, 1-(phenylmethylene)-	1.21	204.1	XIC(204.10Â±500ppm)	1618874	286	558	47.5035 min, 4.177 s	0.128	905
2-Butanone,4-(2,4,6-trimethoxyphenyl)	1.26	181.09	XIC(181.09Â±500ppm)	1643720	402	583	47.8369 min, 3.627 s	0.12	739
2,3-Dihydro-1-oxo-1H-phenalene	1.28	153.08	XIC(153.08Â±500ppm)	887755	276	220	47.9202 min, 5.115 s	0.163	800
1,2-Benzenedicarboxylic acid, dipropyl ester	0.52	149.03	XIC(149.03Â±500ppm)	2629050	158	520	48.0869 min, 3.229 s	0.076	799
[1,1'-Biphenyl]-4,4'-diol	1.37	157.07	XIC(157.07Â±500ppm)	1153192	395	264	48.4203 min, 5.477 s	0.174	754
2-Hydroxyfluorene	1.15	182.08	XIC(182.08Â±500ppm)	3171064	941	774	48.5036 min, 4.554 s	0.144	824
Anthracene, 2-methyl-	1.27	192.1	XIC(192.10Â±500ppm)	5377913	742	1338	48.5869 min, 4.174 s	0.133	889
1H-Phenalen-1-one	1.21	152.07	XIC(152.07Â±500ppm)	14449505	1736	1745	48.6703 min, 5.439 s	0.171	940
Phthalic acid, 2-pentyl 2-propyl ester	1.16	149.03	XIC(149.03Â±500ppm)	899408	393	294	48.7536 min, 3.074 s	0.106	775
5-(3-Hydroxypropyl)-2,3-dimethoxyphenol	1.08	168.08	XIC(168.08Â±500ppm)	22854506	2214	3270	48.837 min, 4.066 s	0.127	850
Scyllo-Inositol	2.7	73.05	XIC(73.05Â±500ppm)	1243145	190	441	49.0036 min, 6.031 s	0.064	740
Hexadecanenitrile	0.15	43.07	XIC(43.07Â±500ppm)	585009	152	74	49.087 min, 2.375 s	0.072	870
4H-Cyclopenta[def]phenanthrene	1.17	190.08	XIC(190.08Â±500ppm)	8172459	843	1684	49.1703 min, 4.536 s	0.146	784
Pyrrolo[1,2-a]pyrazine-1,4-dione, hexahydro-3-(2-methylpropyl)-	1.14	70.08	XIC(70.08Â±500ppm)	1541171	404	325	49.1703 min, 4.734 s	0.157	769
5-Nonadecen-1-ol	1.12	81.04	XIC(81.04Â±500ppm)	592437	162	173	49.2537 min, 2.124 s	0.064	735
Phenanthrene, 2-methyl-	1.34	192.1	XIC(192.10Â±500ppm)	5760884	1698	1314	49.5037 min, 4.340 s	0.142	908
Hexadecanal, 2-methyl-	1.1	58.06	XIC(58.06Â±500ppm)	347368	118	109	49.587 min, 2.019 s	0.06	725
3-methoxy-4-hydroxy-methyl-nitrostyrene	2.16	41.04	XIC(41.04Â±500ppm)	2821013	236	115	49.587 min, 4.095 s	0.137	822
Norharmane, N-methyl-	1.36	182.09	XIC(182.09Â±500ppm)	1320456	347	370	49.7537 min, 5.061 s	0.164	870
5,10-Diethoxy-2,3,7,8-tetrahydro-1H,6H-dipyrrolo[1,2-a:1',2'-d]pyrazine	1.61	70.07	XIC(70.07Â±500ppm)	10689273	1502	1316	50.0037 min, 5.808 s	0.186	824
Benzeneacetic acid, 2-propenyl ester	1.1	91.06	XIC(91.06Â±500ppm)	2044277	242	226	50.0871 min, 5.242 s	0.151	730
9H-Fluoren-9-one, 1-hydroxy-	1.79	196.06	XIC(196.06Â±500ppm)	6052544	510	979	50.3371 min, 4.911 s	0.167	859
1,3,5-Triazine-2,4-diamine, 6-phenyl-	1.56	187.08	XIC(187.08Â±500ppm)	1578858	554	444	50.3371 min, 5.499 s	0.177	731
9H-Carbazole, 9-methyl-	1.18	181.09	XIC(181.09Â±500ppm)	1203394	362	350	50.4204 min, 4.571 s	0.142	846
1-Phenanthrenol	1.25	165.08	XIC(165.08Â±500ppm)	1385782	424	261	50.7538 min, 4.819 s	0.157	773
Phenanthrene-9-carboxaldehyde	0.86	206.07	XIC(206.07Â±500ppm)	536039	101	254	50.8371 min, 4.267 s	0.125	742
9,10-Anthracenedione	0.99	180.07	XIC(180.07Â±500ppm)	3564785	302	699	50.9205 min, 4.859 s	0.151	877
9H-Pyrido[3,4-b]indole	1.26	168.07	XIC(168.07Â±500ppm)	734463	221	231	51.1705 min, 5.380 s	0.174	710
Phenol, 2,2'-methylenebis-	1.05	107.05	XIC(107.05Â±500ppm)	3874943	464	704	51.4205 min, 4.381 s	0.133	838
trans-Sinapaldehyde	1.08	208.08	XIC(208.08Â±500ppm)	17461300	1653	2783	51.5872 min, 4.205 s	0.132	868
Phthalic acid, di(2-methylbutyl) ester	1.3	149.03	XIC(149.03Â±500ppm)	2885554	532	510	52.0039 min, 2.824 s	0.102	802
trans-Sinapyl alcohol	0.93	167.08	XIC(167.08Â±500ppm)	2223602	263	438	52.0039 min, 4.173 s	0.128	793
Anthracene, 2-ethyl-	1.66	191.09	XIC(191.09Â±500ppm)	1431512	217	269	52.0872 min, 3.973 s	0.191	719
Phenol, 2-[(4-hydroxyphenyl)methyl]-	1.04	107.05	XIC(107.05Â±500ppm)	4622697	436	776	52.0872 min, 4.596 s	0.14	851
Diamyl phthalate	1.2	149.03	XIC(149.03Â±500ppm)	21157314	2885	3729	52.4206 min, 2.790 s	0.097	814
Phenanthrene, 2,7-dimethyl-	1.71	206.11	XIC(206.11Â±500ppm)	1148495	344	397	52.4206 min, 3.883 s	0.128	766
Benzene, 1,2-dimethyl-4-(phenylmethyl)-	1.05	196.09	XIC(196.09Â±500ppm)	3955167	339	842	52.4206 min, 4.279 s	0.138	749
Naphthalic anhydride	1.24	126.05	XIC(126.05Â±500ppm)	2467508	1264	693	52.9206 min, 5.513 s	0.171	942
Phthalic acid, isobutyl octyl ester	1.26	149.03	XIC(149.03Â±500ppm)	9781021	1808	1627	53.004 min, 2.790 s	0.093	855
Phenanthrene, 3,6-dimethyl-	1.55	206.11	XIC(206.11Â±500ppm)	2888159	620	804	53.004 min, 3.949 s	0.13	816
Naphthalene, 1,8-di-1-propynyl-	1.42	204.1	XIC(204.10Â±500ppm)	1492614	229	500	53.004 min, 4.199 s	0.133	767
Cyclopenta(def)phenanthrenone	1.34	204.06	XIC(204.06Â±500ppm)	5003893	862	1130	53.1706 min, 4.814 s	0.159	904
5-Ethylnonadecane	1.25	57.09	XIC(57.09Â±500ppm)	3202016	582	448	53.3373 min, 1.749 s	0.056	858
Fluoranthene	1.52	202.08	XIC(202.08Â±500ppm)	84636300	14829	4470	53.6707 min, 4.511 s	0.153	964
Benzo[c]cinnoline, 4-methyl-	1.2	165.08	XIC(165.08Â±500ppm)	581308	143	164	53.9207 min, 5.089 s	0.139	839
1H-inden-1-one, 2-(2-furanylmethylene)-2,3-dihydro-	1.58	210.07	XIC(210.07Â±500ppm)	1719990	289	569	54.2541 min, 4.451 s	0.176	761
9-(Cyanomethylene)fluorene	1.63	203.08	XIC(203.08Â±500ppm)	866266	148	295	54.2541 min, 4.719 s	0.147	839
Tridecane, 4-methyl-	4.36	43.07	XIC(43.07Â±500ppm)	512661	147	70	54.3374 min, 1.751 s	0.083	782
1,1'-Biphenyl, 5-hydroxy-3,4'-dimethoxy-	1.11	230.1	XIC(230.10Â±500ppm)	3743035	865	1441	54.4207 min, 3.965 s	0.122	706
1H-Cyclopenta[l]phenanthrene, 2,3-dihydro-	4.76	218.11	XIC(218.11Â±500ppm)	752980	280	403	54.5041 min, 3.824 s	0.13	784
Acenaphtho(1,2-b)pyridine	1.54	203.08	XIC(203.08Â±500ppm)	1037230	242	301	54.8374 min, 4.843 s	0.161	834
Phthalic acid, bis(2-pentyl) ester	1.11	149.03	XIC(149.03Â±500ppm)	2781980	608	829	55.0875 min, 2.673 s	0.088	822
9,12-Octadecadienoic acid, methyl ester	1.03	67.07	XIC(67.07Â±500ppm)	1212115	206	184	55.1708 min, 2.208 s	0.067	902
Pyrene	1.42	202.08	XIC(202.08Â±500ppm)	83926967	6756	4253	55.1708 min, 4.748 s	0.156	923
Benzo[b]naphtho[2,3-d]furan	1.72	218.08	XIC(218.08Â±500ppm)	9459795	1159	1684	55.5042 min, 4.190 s	0.138	858
Hentetracontanoic acid	1.73	57.09	XIC(57.09Â±500ppm)	3370368	218	435	55.6708 min, 1.742 s	0.068	772
Pyrene, 4,5-dihydro-	0.96	204.1	XIC(204.10Â±500ppm)	387810	104	163	55.7542 min, 4.476 s	0.135	794
Phthalic acid, butyl pent-4-enyl ester	1.12	149.03	XIC(149.03Â±500ppm)	10502450	2177	2884	55.8375 min, 3.238 s	0.104	831
9H-Fluoren-9-one, hydrazone	1.06	165.08	XIC(165.08Â±500ppm)	2035453	245	329	55.8375 min, 4.779 s	0.136	715
9,12-Octadecadienoic acid (Z,Z)-	1.07	67.07	XIC(67.07Â±500ppm)	6525368	893	715	56.2542 min, 2.295 s	0.07	919
Phthalic acid, cyclohexyl 2-pentyl ester	1.12	149.03	XIC(149.03Â±500ppm)	2511043	999	883	56.5042 min, 3.091 s	0.096	790
Oxacycloheptadec-8-en-2-one, (8Z)-	1.53	41.06	XIC(41.06Â±500ppm)	565936	179	58	56.5876 min, 2.789 s	0.095	831
Phenanthrene, 2,3,5-trimethyl-	2.86	220.13	XIC(220.13Â±500ppm)	1487208	214	435	56.5876 min, 3.675 s	0.156	723
m-Terphenyl	2.04	230.11	XIC(230.11Â±500ppm)	1499736	224	616	56.5876 min, 3.740 s	0.124	731
9-Octadecenal	0.52	43.06	XIC(43.06Â±500ppm)	900627	136	96	56.9209 min, 2.219 s	0.071	731
3,4,5-Trimethoxy-B-Nitrostyrene	2.77	41.04	XIC(41.04Â±500ppm)	5518251	430	260	56.9209 min, 3.840 s	0.164	743
1,3-Dioxolane, 2-(6-heptynyl)-	4.18	73.05	XIC(73.05Â±500ppm)	1446742	104	387	57.0043 min, 6.010 s	0.06	725
Sulfurous acid, pentadecyl pentyl ester	1.68	57.09	XIC(57.09Â±500ppm)	2773692	210	348	57.171 min, 1.716 s	0.135	843
Pyrene, 2-methyl-	1.37	216.1	XIC(216.10Â±500ppm)	5628254	703	1246	57.3376 min, 4.142 s	0.145	900
Eicosane, 1-iodo-	0.63	57.09	XIC(57.09Â±500ppm)	4016954	464	502	57.421 min, 1.729 s	0.059	842
7H-Benzo[c]fluorene	1.1	216.1	XIC(216.10Â±500ppm)	14356499	489	2353	58.171 min, 4.293 s	0.134	928
6,7-Dimethoxy-4-ethylcoumarin	1.1	234.1	XIC(234.10Â±500ppm)	2693579	665	685	58.3377 min, 4.482 s	0.137	750
Retene	1.69	44.01	XIC(44.01Â±500ppm)	1631108	318	40	58.4211 min, 3.504 s	0.108	739
Arachidamide, N-methyl-	1.1	73.06	XIC(73.06Â±500ppm)	3907943	775	644	58.5877 min, 2.453 s	0.072	879
Cannabidivarol	1.1	203.12	XIC(203.12Â±500ppm)	2748800	973	833	58.7544 min, 3.101 s	0.098	852
E-2-Tetradecen-1-ol	0.38	43.07	XIC(43.07Â±500ppm)	519770	140	77	58.9211 min, 2.009 s	0.059	910
Chrysene	1.18	228.1	XIC(228.10Â±500ppm)	721505	195	417	59.5045 min, 4.114 s	0.122	787
Hexadecanoic acid, 2-hydroxy-1-(hydroxymethyl)ethyl ester	0.98	43.06	XIC(43.06Â±500ppm)	558615	149	77	59.6712 min, 2.199 s	0.063	728
N,N-Dimethyldodecanamide	1.13	87.07	XIC(87.07Â±500ppm)	813392	448	392	59.7545 min, 2.318 s	0.066	893
Anthra[1,9-cd]pyrazol-6(2H)-one	1.49	220.06	XIC(220.06Â±500ppm)	1073814	423	368	60.1712 min, 4.984 s	0.16	735
(E)-3,3'-Dimethoxy-4,4'-dihydroxystilbene	1.11	272.11	XIC(272.11Â±500ppm)	767197	359	643	60.8379 min, 3.966 s	0.12	763
2-Nonadecanone	0.92	43.05	XIC(43.05Â±500ppm)	429019	285	51	61.2546 min, 1.974 s	0.058	840
2H-Phenanthro[9,10-b]pyran	1.18	232.09	XIC(232.09Â±500ppm)	600075	219	357	61.2546 min, 4.165 s	0.163	718
Pyrrolo[1,2-a]pyrazine-1,4-dione, hexahydro-3-(phenylmethyl)-	1.08	125.08	XIC(125.08Â±500ppm)	3740481	1192	1115	61.4213 min, 5.182 s	0.156	861
o-Terphenyl	1.57	230.11	XIC(230.11Â±500ppm)	878107	197	443	61.5046 min, 3.969 s	0.143	746
2-Propanone, 1-hydroxy-3-(4-hydroxy-3-methoxyphenyl)-	1.07	137.06	XIC(137.06Â±500ppm)	11515585	1512	3580	61.588 min, 3.850 s	0.115	770
Eicosanoic acid, methyl ester	1.09	74.04	XIC(74.04Â±500ppm)	700219	322	228	61.838 min, 1.927 s	0.056	827
11H-Benzo[a]fluoren-11-one	0.96	230.08	XIC(230.08Â±500ppm)	1320677	202	492	62.0047 min, 4.502 s	0.132	744
Docosane, 1-iodo-	0.49	85.1	XIC(85.10Â±500ppm)	1468108	290	457	62.6714 min, 1.731 s	0.053	824
Cyclopenta[cd]pyrene	1.45	226.08	XIC(226.08Â±500ppm)	11148891	1435	1702	63.0048 min, 4.521 s	0.145	887
6H-Dibenzo[b,d]pyran-1-ol, 6,6,9-trimethyl-3-propyl-	1.11	267.15	XIC(267.15Â±500ppm)	991761	466	514	63.0881 min, 3.230 s	0.101	779
Benzo[ghi]fluoranthene	1.07	226.08	XIC(226.08Â±500ppm)	1283715	377	510	63.2548 min, 4.503 s	0.141	896
1-Hydroxypyrene	1.14	218.08	XIC(218.08Â±500ppm)	559176	181	262	63.3381 min, 4.738 s	0.131	843
N-Methyldodecanamide	1.13	73.06	XIC(73.06Â±500ppm)	723166	361	163	63.5048 min, 2.444 s	0.071	793
Phenol, 4-[[2-(3,4-dimethoxyphenyl)ethylamino]methyl]-2-methoxy-	1.08	137.06	XIC(137.06Â±500ppm)	2512862	741	1099	63.9215 min, 3.567 s	0.105	706
1-Hexyl-1-nitrocyclohexane	3.59	55.07	XIC(55.07Â±500ppm)	705951	104	97	64.0882 min, 1.744 s	0.285	715
Cannabidiol	1.05	231.15	XIC(231.15Â±500ppm)	5573791	2048	2089	64.3382 min, 2.869 s	0.088	866
Benz[a]anthracene	1.61	228.1	XIC(228.10Â±500ppm)	11045939	905	1598	64.5882 min, 4.376 s	0.136	931
Allogibberic acid	1.12	284.12	XIC(284.12Â±500ppm)	2500450	729	1075	64.7549 min, 3.660 s	0.111	711
Benz[a]anthracene:2	1.8	228.1	XIC(228.10Â±500ppm)	14839059	1815	1798	64.8382 min, 4.504 s	0.148	941
1,3-Benzodioxole, 2-acetyl-4-methoxy-2-methyl-	0.49	165.06	XIC(165.06Â±500ppm)	1106188	213	487	65.5883 min, 3.606 s	0.104	702
7H-Benz[de]anthracen-7-one	1.17	230.08	XIC(230.08Â±500ppm)	2097002	425	669	65.6716 min, 4.906 s	0.15	890
1,6-Dibenzofurandiol, 5a,6,7,8,9,9a-hexahydro-6-methyl-9-(1-methylethenyl)-3-pentyl-, (5aa,6a,9a,9aa)-	1.44	43.04	XIC(43.04Â±500ppm)	311972	168	37	66.005 min, 3.077 s	0.092	718
Naphtho[2,1,8,7-klmn]xanthene	1.33	242.08	XIC(242.08Â±500ppm)	930529	410	443	66.1717 min, 4.457 s	0.137	739
2,6-Bis(1,1-dimethylethyl)-4-(imidazoline-2,4-dion-5-yl)phenol	1.15	289.12	XIC(289.12Â±500ppm)	617584	237	1007	66.505 min, 3.613 s	0.102	796
Dronabinol	0.81	41.06	XIC(41.06Â±500ppm)	185924	228	21	66.8384 min, 2.929 s	0.075	817
Docosanoic acid, methyl ester	1.07	74.04	XIC(74.04Â±500ppm)	2894977	908	711	67.0884 min, 1.867 s	0.055	715
Chrysene, 1-methyl-	1.33	242.11	XIC(242.11Â±500ppm)	1102531	460	526	67.8385 min, 4.116 s	0.149	874
(3-Methyl-oxiran-2-yl)-methanol	1.32	43.03	XIC(43.03Â±500ppm)	36792127	1474	1911	68.1718 min, 5.972 s	0.037	729
4-(4-Hydroxy-3-methoxystyryl)-2,6-dimethoxyphenol	1.16	302.13	XIC(302.13Â±500ppm)	537243	259	501	68.2552 min, 3.948 s	0.111	706
Cannabinol	1.13	295.18	XIC(295.18Â±500ppm)	1784719	924	911	68.5052 min, 2.971 s	0.092	880
Allylescaline	0.93	167.07	XIC(167.07Â±500ppm)	9355222	1345	2581	68.5052 min, 3.713 s	0.111	751
Eicosanenitrile	1.11	57.08	XIC(57.08Â±500ppm)	283331	101	69	69.2553 min, 1.998 s	0.059	819
Henicosanal	0.67	57.09	XIC(57.09Â±500ppm)	1767869	327	449	69.5886 min, 1.872 s	0.054	786
Tridecane, 2,2,4,10,12,12-hexamethyl-7-(3,5,5-trimethylhexyl)-	2.01	57.09	XIC(57.09Â±500ppm)	2380551	293	393	70.172 min, 1.622 s	0.085	739
Butane, 2-iodo-3-methyl-	1.59	71.09	XIC(71.09Â±500ppm)	952743	135	353	70.172 min, 1.626 s	0.142	800
3-(3,4-Dimethoxyphenyl)-7-hydroxychromen-2-one	1.11	298.13	XIC(298.13Â±500ppm)	2202587	742	1103	70.5054 min, 3.537 s	0.106	725
Succinic acid, 3-methylbut-2-en-1-yl diphenylmethyl ester	1.07	167.07	XIC(167.07Â±500ppm)	3381528	848	1188	71.2554 min, 3.385 s	0.102	744
Phenol, 4,4'-methylenebis[2,6-dimethoxy-	1.14	320.14	XIC(320.14Â±500ppm)	2865544	1056	1906	71.8388 min, 3.765 s	0.113	774
Tetracosanoic acid, methyl ester	1.04	74.04	XIC(74.04Â±500ppm)	4891368	1296	967	71.9221 min, 1.821 s	0.053	879
Oxalic acid, cyclobutyl octadecyl ester	1.19	43.07	XIC(43.07Â±500ppm)	1062891	180	134	72.0055 min, 1.832 s	0.074	778
3,3',4,4'-Tetramethoxystilbene	1.1	300.11	XIC(300.11Â±500ppm)	1256000	664	920	72.2555 min, 3.782 s	0.114	713
Benzo[k]fluoranthene	1.49	252.1	XIC(252.10Â±500ppm)	4481657	845	1194	72.2555 min, 4.394 s	0.135	916
Perylene	0.8	252.1	XIC(252.10Â±500ppm)	6215430	293	1175	72.3388 min, 4.491 s	0.129	938
Hexadecanoic acid, 2-hydroxy-, methyl ester	0.99	43.07	XIC(43.07Â±500ppm)	293480	119	46	72.6722 min, 1.923 s	0.059	802
Benzo[b]fluoranthene	1.09	252.1	XIC(252.10Â±500ppm)	384978	123	195	73.1722 min, 4.477 s	0.127	888
Decanedioic acid, bis(2-ethylhexyl) ester	0.15	57.09	XIC(57.09Â±500ppm)	386434	204	124	73.6723 min, 1.921 s	0.059	869
Benzo(a)pyrene-4,5-dione	1.13	254.08	XIC(254.08Â±500ppm)	911308	246	397	74.1723 min, 5.016 s	0.142	764
Heneicosanoic acid, methyl ester	1.05	74.04	XIC(74.04Â±500ppm)	1574512	804	432	74.2557 min, 1.803 s	0.053	825
Benzo[j]fluoranthene	1.2	252.1	XIC(252.11Â±500ppm)	5230941	1541	1277	74.2557 min, 4.682 s	0.146	928
2-Octanamine	0.08	44.01	XIC(44.01Â±500ppm)	5118059	170	246	74.7557 min, 6.153 s	0.07	739
3,4-Divanillyltetrahydrofuran	1.03	137.06	XIC(137.06Â±500ppm)	4107941	728	1236	75.7558 min, 3.599 s	0.103	833
5-formyl-2,3,3',4'-tetramethoxystilbene	1.03	44	XIC(44.00Â±500ppm)	1817772	448	29	76.1725 min, 3.458 s	0.101	710
Hexacosanoic acid, methyl ester	1.06	74.04	XIC(74.04Â±500ppm)	1809097	527	403	76.5058 min, 1.782 s	0.051	833
d-Tocopherol	1.12	137.06	XIC(137.06Â±500ppm)	304675	184	152	76.6725 min, 2.248 s	0.066	754
ÃŸ-Sitosterol acetate	1.05	43.07	XIC(43.07Â±500ppm)	980058	319	95	76.9225 min, 2.270 s	0.07	802
Dehydroergosterol 3,5-dinitrobenzoate	1.09	251.19	XIC(251.19Â±500ppm)	312086	321	245	76.9225 min, 2.535 s	0.074	727
(E)-Hex-3-enyl (E)-2-methylbut-2-enoate	1.57	82.08	XIC(82.08Â±500ppm)	938520	158	240	78.006 min, 1.765 s	0.054	776
24-Noroleana-3,12-diene	1.14	218.21	XIC(218.21Â±500ppm)	742055	470	484	78.1726 min, 2.648 s	0.078	839
ÃŸ-SITOSTANYL ACETATE	0.99	43.07	XIC(43.07Â±500ppm)	518520	269	72	78.5893 min, 2.409 s	0.068	772
Stigmasta-3,5-diene	1.12	43.07	XIC(43.07Â±500ppm)	1419033	297	132	79.006 min, 2.485 s	0.073	811
Lupeol, trifluoroacetate	1.07	93.07	XIC(93.07Â±500ppm)	1979269	620	396	79.1727 min, 2.811 s	0.087	853
Cholesta-4,6-dien-3-ol, (3ÃŸ)-	1	43.07	XIC(43.07Â±500ppm)	2815895	620	264	79.2561 min, 2.569 s	0.076	808
2-Hydrazinoethanol	1.6	45.03	XIC(45.03Â±500ppm)	1516028	154	244	79.4227 min, 5.968 s	0.053	724
Oxirane, [(hexadecyloxy)methyl]-	0.63	43.06	XIC(43.06Â±500ppm)	307202	423	41	80.4228 min, 1.964 s	0.066	828
Benzo[ghi]perylene	1.12	276.1	XIC(276.10Â±500ppm)	518780	156	330	80.5062 min, 5.423 s	0.147	871
9,19-Cycloergost-24(28)-en-3-ol, 4,14-dimethyl-, acetate, (3ÃŸ,4a,5a)-	1.33	55.07	XIC(55.07Â±500ppm)	619909	457	94	80.6728 min, 2.711 s	0.104	775
24-Norursa-3,12-diene	0.23	55.07	XIC(55.07Â±500ppm)	266612	145	50	80.6728 min, 3.087 s	0.093	814
Triacontanoic acid, methyl ester	1.1	74.04	XIC(74.04Â±500ppm)	902822	220	155	80.7562 min, 1.959 s	0.057	792
Methyltartronic acid	1.76	45.04	XIC(45.04Â±500ppm)	2015113	155	308	81.5062 min, 5.968 s	0.059	766
Propyl tetracosyl ether	1.18	43.07	XIC(43.07Â±500ppm)	868307	315	112	82.3396 min, 2.075 s	0.063	858
Campesterol	1.09	43.07	XIC(43.07Â±500ppm)	1444229	168	138	82.423 min, 3.262 s	0.098	873
Neoergosterol	0.16	55.07	XIC(55.07Â±500ppm)	207972	157	42	82.5897 min, 3.795 s	0.105	774
Stigmasterol	1.22	55.07	XIC(55.07Â±500ppm)	554964	162	101	83.0897 min, 3.340 s	0.107	831
Nonacosan-14-one	1.09	43.07	XIC(43.07Â±500ppm)	1132121	316	122	83.7564 min, 2.236 s	0.068	813
ÃŸ-Sitosterol	1.08	43.07	XIC(43.07Â±500ppm)	24021550	2417	1117	84.1731 min, 3.595 s	0.114	924
6ÃŸBicyclo[4.3.0]nonane, 5ÃŸ-iodomethyl-1ÃŸ-isopropenyl-4a,5a-dimethyl-,	1.16	109.1	XIC(109.10Â±500ppm)	1307303	297	366	84.1731 min, 4.211 s	0.13	753
ÃŸ-Amyrone	1.12	218.21	XIC(218.21Â±500ppm)	1466647	587	841	84.3398 min, 4.223 s	0.13	888
Cholest-5-en-3-ol, 24-propylidene-, (3ÃŸ)-	0.63	55.07	XIC(55.07Â±500ppm)	816350	126	124	84.5898 min, 3.825 s	0.11	754
ÃŸ-Amyrin	1.08	218.21	XIC(218.21Â±500ppm)	4348230	875	1535	84.7565 min, 4.333 s	0.133	878
9,19-Cyclolanost-24-en-3-ol, (3ÃŸ)-	0.6	69.08	XIC(69.08Â±500ppm)	2326628	255	334	84.9232 min, 4.082 s	0.124	805
Sulfurous acid, butyl tetradecyl ester	1.18	57.09	XIC(57.09Â±500ppm)	455460	112	118	85.1732 min, 2.111 s	0.074	774
4,8,13-Cyclotetradecatriene-1,3-diol, 1,5,9-trimethyl-12-(1-methylethyl)-	1.26	55.07	XIC(55.07Â±500ppm)	4695314	1113	357	85.1732 min, 3.949 s	0.153	755
Lup-20(29)-en-3-one	1	95.09	XIC(95.09Â±500ppm)	4320881	444	697	85.2565 min, 4.634 s	0.135	897
Ergosta-4,6,8(14),22-tetraen-3-one	1.24	69.08	XIC(69.08Â±500ppm)	853764	267	165	85.4232 min, 4.590 s	0.136	802
Lupeol	1.2	218.21	XIC(218.21Â±500ppm)	7933555	834	2178	85.6732 min, 4.764 s	0.144	884
Stigmasta-3,5-dien-7-one	1.08	174.11	XIC(174.11Â±500ppm)	8874951	1318	2714	86.0066 min, 4.434 s	0.133	856
Triacontyl acetate	1.35	43.07	XIC(43.07Â±500ppm)	528788	217	74	86.1733 min, 2.528 s	0.079	888
Propanenitrile, 3-methoxy-	1.05	45.05	XIC(45.05Â±500ppm)	2645705	117	432	86.1733 min, 5.990 s	0.064	749
?-Sitostenone	0.68	43.07	XIC(43.07Â±500ppm)	9081124	542	568	86.7567 min, 4.575 s	0.2	786
Lanosta-8,24-dien-3-ol, acetate, (3ÃŸ)-	1.14	69.08	XIC(69.08Â±500ppm)	3294158	566	678	86.84 min, 4.157 s	0.129	817
9,19-Cyclolanostan-3-ol, acetate, (3ÃŸ)-	1.07	43.07	XIC(43.07Â±500ppm)	8736998	857	506	87.34 min, 4.933 s	0.149	789
Olean-12-en-3-ol, acetate, (3ÃŸ)-	1.15	43.05	XIC(43.05Â±500ppm)	6824125	1275	346	87.5901 min, 4.852 s	0.147	860
p-Anisic acid, 3,4-dichlorophenyl ester	1.74	135.07	XIC(135.07Â±500ppm)	5280832	143	963	88.9235 min, 6.153 s	0.074	769
Sulfurous acid, decyl 2-propyl ester	1.01	57.09	XIC(57.09Â±500ppm)	457041	191	101	94.674 min, 3.892 s	0.169	702
Succinic acid, 1,1,1-trifluoroprop-2-yl 2-methylpent-3-yl ester	2	197.06	XIC(197.06Â±500ppm)	3108100	167	737	96.1741 min, 6.147 s	0.072	753
Pyrazolo[1,5-a]pyrimidine, 2-methyl-7-phenyl-	4.2	208.04	XIC(208.04Â±500ppm)	33950823	257	4200	97.0075 min, 5.975 s	0.051	759
2-Methoxybenzoic acid, 3,4-dimethylphenyl ester	1.9	135.07	XIC(135.07Â±500ppm)	35382064	279	3066	97.0908 min, 6.160 s	0.056	738
p-Anisic acid, 4-nitrophenyl ester	1.98	135.06	XIC(135.06Â±500ppm)	11399176	253	1696	97.8409 min, 6.159 s	0.056	718

## Sheet: Prosopis spp (PTFE7)
Name	Tailing.Factor	Base.Mass	Quant.Masses	Area	Peak.S.N	Quant.S.N	R.T...min.	FWHH..s.	Similarity
Acetic acid, 1,1-dimethylethyl ester	1.91	43	XIC(43.00±500ppm)	248219025	1194	1710	3.83336 min, 1.591 s	0.061	759
4-Chloro-4-methylpentane-2,3-dione	2.11	43.09	XIC(43.09±500ppm)	383736651	1124	2382	3.83336 min, 1.652 s	0.091	758
Phenol, 4-[2-(methylamino)ethyl]-	0.16	44	XIC(44.00±500ppm)	6905093	164	204	4.16672 min, 6.268 s	0.112	732
Oxetane, 3-(1-methylethyl)-	0.42	55.07	XIC(55.07±500ppm)	11007363	402	1043	4.3334 min, 1.672 s	0.107	726
2-Propanone, 1,1,1-trifluoro-	0.1	43.03	XIC(43.03±500ppm)	5491070	361	118	4.41674 min, 1.907 s	0.104	737
Pentane, 2,2,4,4-tetramethyl-	4.57	57.08	XIC(57.08±500ppm)	17922127	726	3820	4.66676 min, 6.477 s	0.119	733
2,2'-Bipyrrolidine	0.73	70.08	XIC(70.08±500ppm)	31117896	325	2858	5.00012 min, 1.548 s	0.062	780
Cyclohexane, 1,2-dimethyl- (cis/trans)	1.31	55.07	XIC(55.07±500ppm)	357608247	12012	15707	5.08346 min, 1.590 s	0.143	876
Z-3,4,4-Trimethyl-2-pentene	1.65	55.07	XIC(55.07±500ppm)	55201361	2440	3342	5.50016 min, 1.606 s	0.157	752
Furan, 2-methoxy-	1.26	83.05	XIC(83.05±500ppm)	8635508	1213	2322	5.50016 min, 2.080 s	0.115	839
Carbonocyanidic acid, ethyl ester	1.27	84.02	XIC(84.02±500ppm)	6349777	2112	1605	5.50016 min, 2.762 s	0.128	740
o-Allylhydroxylamine	0.39	41.08	XIC(41.08±500ppm)	12899151	109	726	5.5835 min, 1.929 s	0.184	710
Pentanoic acid	2.4	60.03	XIC(60.03±500ppm)	8405531	696	511	5.66684 min, 1.727 s	0.082	701
Cyclopentane, 1-ethyl-3-methyl-, cis-	7.96	55.07	XIC(55.07±500ppm)	317233	1357	59	5.66684 min, 6.361 s	0.294	872
Hexyl octyl ether	2.94	43.07	XIC(43.07±500ppm)	11754752	713	484	6.08354 min, 1.549 s	0.116	797
1-Butoxy-2-propanol acetate	1.57	43.04	XIC(43.04±500ppm)	2012655	102	54	6.08354 min, 2.401 s	0.129	716
2-Ethoxytetrahydrofuran	0.18	71.06	XIC(71.06±500ppm)	2448974	278	747	6.16688 min, 2.049 s	0.117	827
2-Propenal	0.96	56.08	XIC(56.08±500ppm)	1094634	175	234	8.00036 min, 1.797 s	0.124	713
2-Mercapto-4,6-dimethylnicotinonitrile, TBDMS derivative	1.91	221.09	XIC(221.09±500ppm)	3292357	592	3596	8.00036 min, 6.434 s	0.145	811
2-Ethyl-tetrahydropyran	1.39	85.07	XIC(85.07±500ppm)	1227485	356	532	8.58374 min, 2.047 s	0.121	741
2(5H)-Furanone	1.13	55.04	XIC(55.04±500ppm)	16068572	3431	1956	9.16712 min, 4.495 s	0.179	917
Bicyclo[3.1.0]hex-2-ene, 4-methyl-1-(1-methylethyl)-	1.42	93.07	XIC(93.07±500ppm)	1016175	359	347	11.584 min, 2.208 s	0.168	809
3,4-Hexanedione, 2,2,5-trimethyl-	0.48	57.09	XIC(57.09±500ppm)	1281039	137	318	12.4174 min, 1.820 s	0.106	713
Propanedioic acid, propyl-	1.35	44.01	XIC(44.01±500ppm)	2215295	100	47	12.4174 min, 2.159 s	0.091	887
2-Oxo-4-phenyl-6-(4-chlorophenyl)-1,2-dihydropyrimidine	0.7	281.07	XIC(281.07±500ppm)	673893671	744	36044	12.8341 min, 1.619 s	0.151	822
2,6-Dimethyldecane	0.4	43.07	XIC(43.07±500ppm)	2092355	216	151	16.6677 min, 1.818 s	0.131	809
1,5-Heptadien-4-ol, 3,3,6-trimethyl-	1.26	85.06	XIC(85.06±500ppm)	694525	355	362	17.2511 min, 2.277 s	0.108	790
Levoglucosenone	0.99	68.04	XIC(68.04±500ppm)	2720375	328	513	17.8345 min, 4.723 s	0.155	892
Octane, 2,6,6-trimethyl-	1.76	43.07	XIC(43.07±500ppm)	6033619	459	231	17.9178 min, 1.793 s	0.096	792
2-Octene, 4-ethyl-	4.13	55.07	XIC(55.07±500ppm)	764559	144	130	18.0012 min, 1.862 s	0.214	708
Cyclohexane, pentyl-	0.63	83.09	XIC(83.09±500ppm)	490266	159	219	18.7512 min, 2.085 s	0.095	781
Methyl-a-d-ribofuranoside	1.12	57.05	XIC(57.05±500ppm)	2256528	260	453	20.0847 min, 5.032 s	0.163	745
Heptanediamide, N,N'-di-benzoyloxy-	1.31	105.04	XIC(105.04±500ppm)	625198	232	212	20.168 min, 3.226 s	0.11	851
Undecane, 2,4-dimethyl-	1.16	57.09	XIC(57.09±500ppm)	5094568	1289	736	20.2513 min, 1.832 s	0.155	863
dl-Menthol	0.87	81.08	XIC(81.08±500ppm)	343667	112	109	20.5847 min, 2.660 s	0.117	873
1,4:3,6-Dianhydro-a-d-glucopyranose	1.08	69.05	XIC(69.05±500ppm)	1627022	449	341	22.1682 min, 4.831 s	0.177	831
2,3-Anhydro-d-mannosan	1.12	71.02	XIC(71.02±500ppm)	442261	287	270	22.9182 min, 4.861 s	0.157	797
4-(Prop-2-enoyloxy)octane	1.43	55.06	XIC(55.06±500ppm)	727695	164	123	23.2516 min, 2.390 s	0.109	786
Eugenol	1.1	164.09	XIC(164.09±500ppm)	252183	175	251	28.8354 min, 3.456 s	0.118	879
1-Methylpentyl isobutyrate	1.32	43.07	XIC(43.07±500ppm)	2452000	172	204	29.0854 min, 1.870 s	0.145	737
Naphthalene, 1-ethyl-	0.99	141.08	XIC(141.08±500ppm)	245604	122	156	30.1688 min, 3.634 s	0.106	758
Vanillin	1.14	151.05	XIC(151.05±500ppm)	7705674	3508	2420	30.5022 min, 4.582 s	0.148	940
Naphthalene, 2,7-dimethyl-	1.02	156.1	XIC(156.10±500ppm)	347736	205	306	31.3356 min, 3.741 s	0.112	875
Sulfurous acid, nonyl 2-pentyl ester	0.73	71.09	XIC(71.09±500ppm)	1426359	264	494	32.0856 min, 1.938 s	0.253	708
Tetradecane, 2,5-dimethyl-	2.04	57.09	XIC(57.09±500ppm)	9742881	356	1276	32.2523 min, 1.859 s	0.092	803
Acenaphthylene	1.09	152.07	XIC(152.06±500ppm)	605656	226	326	32.3356 min, 4.433 s	0.141	893
Phenol, 2-methoxy-4-(1-propenyl)-	1.1	164.09	XIC(164.09±500ppm)	811736	391	594	32.669 min, 3.619 s	0.115	908
Pentane, 3-ethyl-2,3-dimethyl-	2.23	57.09	XIC(57.09±500ppm)	4670117	255	784	32.8357 min, 1.860 s	0.114	814
Phenol, 2-methoxy-4-propyl-	1.12	137.07	XIC(137.07±500ppm)	1680265	519	988	33.0024 min, 4.409 s	0.141	854
Oxalic acid, bis(2-ethylhexyl) ester	0.38	57.09	XIC(57.09±500ppm)	720724	175	209	33.5857 min, 2.008 s	0.094	741
6-Methoxy-3-methylbenzofuran	1.13	162.08	XIC(162.08±500ppm)	2363006	358	916	34.0024 min, 4.132 s	0.131	739
Apocynin	1.13	151.05	XIC(151.05±500ppm)	1670298	832	869	34.0858 min, 4.433 s	0.14	895
Benzene, 1,2,3-trimethoxy-5-methyl-	0.92	167.08	XIC(167.08±500ppm)	649735	243	471	35.7526 min, 3.749 s	0.122	719
2-Propanone, 1-(4-hydroxy-3-methoxyphenyl)-	1.09	137.07	XIC(137.07±500ppm)	1924362	650	1024	35.9193 min, 4.303 s	0.137	808
Hexane, 1-(hexyloxy)-3-methyl-	0.44	43.07	XIC(43.07±500ppm)	755348	107	73	36.2526 min, 1.924 s	0.195	720
4-Octene, 2,6-dimethyl-, [S-(E)]-	4.2	55.08	XIC(55.08±500ppm)	624517	144	101	36.9193 min, 1.910 s	0.255	738
2,6-Dimethoxybenzoquinone	1.06	69.02	XIC(69.02±500ppm)	4371579	1534	748	37.2527 min, 5.847 s	0.18	907
1,6-Anhydro-ß-D-glucofuranose	1.15	73.04	XIC(73.04±500ppm)	593221	260	178	37.5027 min, 5.402 s	0.172	820
4-(1-Hydroxyallyl)-2-methoxyphenol	1.09	137.07	XIC(137.07±500ppm)	878350	331	421	37.5861 min, 4.353 s	0.132	882
Butyrovanillone	1.2	151.05	XIC(151.05±500ppm)	965716	437	583	38.0861 min, 4.175 s	0.136	803
Phenol, 2,6-dimethoxy-4-(2-propenyl)-	1.03	194.11	XIC(194.11±500ppm)	182659	132	160	38.7528 min, 3.769 s	0.114	709
Benzenepropanol, 4-hydroxy-3-methoxy-	1.09	137.07	XIC(137.07±500ppm)	668238	283	447	40.3363 min, 4.177 s	0.129	860
Homosyringaldehyde	1.08	167.08	XIC(167.08±500ppm)	891607	619	595	42.4198 min, 4.506 s	0.143	795
Tridecanoic acid, methyl ester	1.05	74.04	XIC(74.04±500ppm)	244022	111	93	43.1698 min, 2.234 s	0.071	741
9H-Fluoren-9-one	1.24	180.07	XIC(180.07±500ppm)	878914	378	519	43.2532 min, 4.752 s	0.149	906
6,10,14-Trimethyl-pentadecan-2-ol	1.85	57.09	XIC(57.09±500ppm)	4215304	492	600	43.3365 min, 1.850 s	0.079	843
Coniferyl aldehyde	1.09	178.07	XIC(178.07±500ppm)	6895673	1312	2371	43.3365 min, 4.477 s	0.137	873
Syringylacetone	1.07	167.08	XIC(167.08±500ppm)	18272069	2024	5297	44.7533 min, 4.321 s	0.136	875
Benzoic acid, 4-hydroxy-3,5-dimethoxy-, hydrazide	1.06	181.06	XIC(181.06±500ppm)	564624	217	342	44.8366 min, 4.201 s	0.13	805
9H-Fluorene, 9-methylene-	1.16	178.09	XIC(178.08±500ppm)	715700	302	432	45.0033 min, 4.560 s	0.139	920
5-Undecene, 3-methyl-, (E)-	0.94	70.09	XIC(70.09±500ppm)	1253662	297	372	45.3367 min, 1.905 s	0.058	830
Cyclo(L-prolyl-L-valine)	1.03	70.08	XIC(70.08±500ppm)	563901	136	156	45.9201 min, 5.175 s	0.147	871
cis-Sinapyl alcohol	1.12	167.08	XIC(167.08±500ppm)	1426011	367	732	46.3368 min, 4.285 s	0.13	751
1-Propanone, 1-(4-hydroxy-3,5-dimethoxyphenyl)-	1.2	181.06	XIC(181.06±500ppm)	6628386	2923	2277	46.5868 min, 4.061 s	0.153	862
Benzene, (1-hexylheptyl)-	1.13	91.06	XIC(91.06±500ppm)	528237	154	144	46.6701 min, 2.192 s	0.075	738
9H-Carbazole-9-methanol	1.1	167.08	XIC(167.08±500ppm)	514856	134	331	46.7535 min, 4.993 s	0.134	836
1H-Phenalen-1-one	1.05	152.08	XIC(152.08±500ppm)	767993	277	398	48.6703 min, 5.446 s	0.169	924
Anthracene, 9-methyl-	1.14	192.1	XIC(192.10±500ppm)	293315	132	237	48.7536 min, 4.226 s	0.121	887
Dihydrosyringenin	0.97	168.09	XIC(168.09±500ppm)	540333	249	400	48.837 min, 4.067 s	0.119	802
Undecanoic acid, ethyl ester	1.03	88.06	XIC(88.06±500ppm)	187050	173	155	48.9203 min, 2.090 s	0.064	757
2-n-Octylfuran	1.11	81.04	XIC(81.04±500ppm)	357325	145	182	49.2537 min, 2.124 s	0.061	742
Phenanthrene, 9-methyl-	1.34	192.1	XIC(192.10±500ppm)	309803	144	223	49.337 min, 4.332 s	0.152	763
Pyrrolo[1,2-a]pyrazine-1,4-dione, hexahydro-3-(2-methylpropyl)-	0.97	70.08	XIC(70.08±500ppm)	820726	225	235	49.7537 min, 4.561 s	0.133	865
Norharmane, N-methyl-	1.12	182.1	XIC(182.10±500ppm)	394468	130	266	49.7537 min, 5.062 s	0.152	795
5,10-Diethoxy-2,3,7,8-tetrahydro-1H,6H-dipyrrolo[1,2-a:1',2'-d]pyrazine	1.83	70.08	XIC(70.08±500ppm)	3241875	304	647	50.0037 min, 5.808 s	0.167	781
9H-Pyrido[3,4-b]indole, 1-methyl-	1.26	182.1	XIC(182.10±500ppm)	655952	398	382	51.0038 min, 4.808 s	0.147	761
trans-Sinapaldehyde	1.06	208.09	XIC(208.09±500ppm)	6635022	1987	1692	51.5872 min, 4.197 s	0.13	868
Phthalic acid, 2-methylbutyl pentyl ester	1.14	149.03	XIC(149.03±500ppm)	2643435	1519	1394	52.4206 min, 2.793 s	0.095	788
Naphthalic anhydride	1.11	126.06	XIC(126.06±500ppm)	469505	327	317	52.9206 min, 5.508 s	0.159	923
Phthalic acid, decyl isobutyl ester	1.2	149.03	XIC(149.03±500ppm)	1278216	517	686	53.004 min, 2.786 s	0.092	758
Phthalic acid, di(2-methylbutyl) ester	1.06	149.03	XIC(149.03±500ppm)	879783	406	629	53.4207 min, 2.805 s	0.093	821
Fluoranthene	1.25	202.09	XIC(202.08±500ppm)	3201766	612	1338	53.6707 min, 4.509 s	0.14	947
Phthalic acid, isobutyl 3-methylbut-3-enyl ester	1.24	149.03	XIC(149.03±500ppm)	625924	462	346	54.3374 min, 3.243 s	0.103	714
Pyrene	1.14	202.09	XIC(202.09±500ppm)	862199	402	625	54.4207 min, 4.576 s	0.133	930
Diamyl phthalate	1.02	149.03	XIC(149.03±500ppm)	2316426	708	1254	54.6708 min, 2.792 s	0.092	837
Cyclopentene	2.41	67.07	XIC(67.07±500ppm)	1225631	171	250	55.8375 min, 3.267 s	0.119	735
Phthalic acid, cyclohexyl 2-pentyl ester	1.01	149.03	XIC(149.03±500ppm)	399355	282	286	56.5042 min, 3.093 s	0.097	778
3,4,5-Trimethoxy-B-Nitrostyrene	2.42	41.04	XIC(41.04±500ppm)	990486	192	96	56.9209 min, 3.836 s	0.172	742
1-Heptanol, 2,4-dimethyl-,	0.54	57.09	XIC(57.09±500ppm)	973842	143	281	57.8377 min, 1.787 s	0.07	783
Eicosyl acetate	1.06	43.06	XIC(43.06±500ppm)	1185924	180	130	58.5044 min, 1.950 s	0.059	848
Pyrene, 1-methyl-	1.19	216.11	XIC(216.11±500ppm)	313483	219	275	59.4211 min, 4.463 s	0.136	904
2-Propanone, 1-hydroxy-3-(4-hydroxy-3-methoxyphenyl)-	1.03	137.07	XIC(137.07±500ppm)	4761098	1148	2300	61.588 min, 3.851 s	0.114	775
Oxalic acid, cyclohexyl decyl ester	0.99	83.04	XIC(83.04±500ppm)	226045	120	121	62.2547 min, 2.389 s	0.062	770
phenol, 4,4'-[dithiobis(methylene)]bis[2-methoxy-	0.99	137.07	XIC(137.07±500ppm)	1444112	536	1003	62.2547 min, 3.793 s	0.109	752
(3-Methyl-oxiran-2-yl)-methanol	1.77	43.04	XIC(43.04±500ppm)	7305151	279	942	62.5047 min, 5.980 s	0.036	756
Benzo[ghi]fluoranthene	1.19	226.09	XIC(226.09±500ppm)	1073817	219	604	63.0048 min, 4.520 s	0.134	905
Sulfurous acid, isohexyl hexyl ester	1.06	85.07	XIC(85.07±500ppm)	566694	243	239	64.2549 min, 1.885 s	0.056	800
Benz[a]anthracene:2	1.51	228.1	XIC(228.10±500ppm)	1749626	643	669	64.8382 min, 4.502 s	0.151	935
5-Methyloxazolidine	2.07	45.04	XIC(45.04±500ppm)	2485831	192	275	66.8384 min, 5.972 s	0.053	730
Oxirane, [(hexadecyloxy)methyl]-	0.43	43.08	XIC(43.08±500ppm)	291157	121	49	68.4219 min, 1.837 s	0.053	722
(E)-3,3'-Dimethoxy-4,4'-dihydroxystilbene	1.13	272.12	XIC(272.12±500ppm)	197444	131	236	69.8386 min, 3.748 s	0.108	734
3-(3,4-Dimethoxyphenyl)-7-hydroxychromen-2-one	1.11	298.14	XIC(298.14±500ppm)	1669037	942	1648	70.5054 min, 3.538 s	0.105	749
1-Heneicosanol	0.25	57.09	XIC(57.09±500ppm)	698359	129	175	71.0887 min, 1.860 s	0.057	904
Octane-3,6-dimethyl-1,8-bis-(2-oxytetrahydro-2H-pyranyl)	1.15	85.07	XIC(85.07±500ppm)	698055	266	283	71.5888 min, 1.811 s	0.056	705
Tetracosanoic acid, methyl ester	1.06	74.04	XIC(74.04±500ppm)	948147	446	375	71.9221 min, 1.821 s	0.052	823
Benzo[k]fluoranthene	1.63	252.1	XIC(252.10±500ppm)	814446	347	497	72.2555 min, 4.387 s	0.133	929
Benzo[k]fluoranthene:2	1.49	252.11	XIC(252.11±500ppm)	535739	228	297	72.4222 min, 4.405 s	0.18	932
n-Tetracosanol-1	0.81	83.09	XIC(83.09±500ppm)	6793865	1500	2569	73.4223 min, 1.659 s	0.058	773
Perylene	1.38	252.1	XIC(252.10±500ppm)	817886	341	499	73.9223 min, 4.678 s	0.134	933
Squalene	1.03	69.08	XIC(69.08±500ppm)	17432439	2054	2587	74.1723 min, 1.895 s	0.056	921
Benzo[j]fluoranthene	1.27	252.11	XIC(252.11±500ppm)	708359	361	450	74.2557 min, 4.678 s	0.134	917
2-Tetradecanone	0.3	43.06	XIC(43.06±500ppm)	341321	110	46	76.0891 min, 1.803 s	0.076	719
1-Decanol, 10-[(tetrahydro-2H-pyran-2-yl)oxy]-	0.7	85.07	XIC(85.07±500ppm)	475382	155	221	76.1725 min, 1.780 s	0.056	721
2-Nonanone, 9-hydroxy-	0.19	43.06	XIC(43.06±500ppm)	425639	181	64	76.1725 min, 1.810 s	0.053	716
Hexacosanoic acid, methyl ester	1.06	74.04	XIC(74.04±500ppm)	2476017	1118	519	76.5058 min, 1.782 s	0.052	814
Heneicosyl acetate	0.38	43.07	XIC(43.07±500ppm)	694036	175	111	78.256 min, 1.796 s	0.053	833
Decanoic acid, 2-propenyl ester	0.26	43.07	XIC(43.07±500ppm)	1052773	346	116	79.6728 min, 1.889 s	0.057	771
ß-Sitosterol acetate	1.1	43.08	XIC(43.08±500ppm)	258568	173	41	79.6728 min, 2.589 s	0.077	877
Heptacosyl acetate	1.09	43.07	XIC(43.07±500ppm)	13032630	1441	1050	82.3396 min, 2.075 s	0.063	923
Stigmasterol	1.09	55.07	XIC(55.07±500ppm)	1562360	391	211	83.0897 min, 3.340 s	0.101	890
22-Stigmasten-3-one	0.73	55.07	XIC(55.07±500ppm)	1060319	120	128	84.0064 min, 3.686 s	0.106	835
Olean-12-en-3-ol, acetate, (3ß)-	1.09	218.21	XIC(218.21±500ppm)	181081	133	169	84.7565 min, 4.331 s	0.119	784
Germanicol	0.47	95.09	XIC(95.09±500ppm)	462533	127	186	84.9232 min, 4.306 s	0.117	847
4-Campestene-3-one	1.01	124.09	XIC(124.09±500ppm)	812493	358	637	85.0065 min, 4.135 s	0.124	792
Lup-20(29)-en-3-one	1.03	81.08	XIC(81.08±500ppm)	2376458	514	410	85.2565 min, 4.631 s	0.139	915
Ergosta-4,6,8(14),22-tetraen-3-one	1.1	69.08	XIC(69.08±500ppm)	398100	123	76	85.4232 min, 4.591 s	0.137	718
4,22-Stigmastadiene-3-one	1.05	55.07	XIC(55.07±500ppm)	2803414	305	304	85.6732 min, 4.248 s	0.13	871
Lupeol	1.06	81.08	XIC(81.08±500ppm)	7949278	1142	1074	85.6732 min, 4.759 s	0.144	926
1-Heptatriacotanol	1	55.07	XIC(55.07±500ppm)	1378448	357	218	86.1733 min, 4.529 s	0.133	716
Stigmast-4-en-3-one	0.76	43.07	XIC(43.07±500ppm)	1060350	404	87	86.7567 min, 4.600 s	0.136	815
9,19-Cyclolanostan-3-ol, acetate, (3ß)-	1.12	43.08	XIC(43.08±500ppm)	888725	242	98	87.34 min, 4.932 s	0.16	783
Urs-12-en-24-oic acid, 3-oxo-, methyl ester, (+)-	0.57	43.05	XIC(43.05±500ppm)	138558	129	17	87.5901 min, 4.843 s	0.153	710
Octatetracontane, 1-iodo-	0.89	57.09	XIC(57.09±500ppm)	2416352	219	312	93.4239 min, 3.499 s	0.114	829
Benzene, 1,1',1''-[1-(bromomethyl)-2-methoxy-1-ethanyl-2-ylidene]tris-	2	197.06	XIC(197.06±500ppm)	3029217	155	842	96.3408 min, 6.148 s	0.067	727

## Sheet: Eucalyptus spp (PTFE8) 
Name	Tailing.Factor	Base.Mass	Quant.Masses	Area	Peak.S.N	Quant.S.N	R.T...min.	FWHH..s.	Similarity
Propanedioic acid, oxo-, bis(1-methylethyl) ester	0.23	43.07	XIC(43.07Â±500ppm)	88368876	689	1237	3.66668 min, 6.163 s	0.147	765
2-Hydrazinoethanol	0.2	45.04	XIC(45.04Â±500ppm)	13416474	133	451	3.75002 min, 6.287 s	0.082	766
(R)-(-)-2-Amino-1-propanol	0.12	44.02	XIC(44.02Â±500ppm)	6376372	130	329	3.83336 min, 6.344 s	0.048	731
Butanoic acid, 3-amino-	13.39	44	XIC(44.00Â±500ppm)	332894022	356	2849	4.00004 min, 2.039 s	0.484	722
CH3C(O)OCH(CH3)C(O)CH3	1.37	43.08	XIC(43.08Â±500ppm)	109095923	847	2331	4.16672 min, 6.480 s	0.129	776
Methyl formate	0.51	60.04	XIC(60.04Â±500ppm)	5890610	204	228	4.3334 min, 6.425 s	0.158	774
Aminoacetonitrile	1.03	55.07	XIC(55.07Â±500ppm)	49008398	685	4489	4.41674 min, 1.562 s	0.187	767
4-Penten-2-one, 4-methyl-	0.29	43.03	XIC(43.03Â±500ppm)	43886248	631	619	4.58342 min, 1.848 s	0.127	864
2(5H)-Furanone	1.33	55.04	XIC(55.04Â±500ppm)	10221120	1962	1016	5.00012 min, 2.532 s	0.121	842
Cyclohexane, 1,2-dimethyl- (cis/trans)	1.32	55.07	XIC(55.07Â±500ppm)	362286035	11484	15395	5.08346 min, 1.589 s	0.144	867
Propanenitrile, 3,3'-oxybis-	1.27	84.02	XIC(84.02Â±500ppm)	7235282	2238	1957	5.50016 min, 2.759 s	0.129	744
trans-1-Butyl-2-methylcyclopropane	2.45	55.07	XIC(55.07Â±500ppm)	1916770	135	289	6.08354 min, 1.561 s	0.144	771
Benzene, 1,3-dimethyl-	1.15	91.05	XIC(91.05Â±500ppm)	3958202	1092	761	8.33372 min, 2.367 s	0.137	858
cis-4-Nonene	1.39	55.07	XIC(55.07Â±500ppm)	2519664	194	306	8.58374 min, 1.692 s	0.108	710
2H-Pyran, 2-(bromomethyl)tetrahydro-	1.33	85.06	XIC(85.06Â±500ppm)	788923	354	409	8.58374 min, 2.051 s	0.122	708
3-Heptyne-2,6-dione, 5-methyl-5-(1-methylethyl)-	1.3	123.08	XIC(123.08Â±500ppm)	2810532	791	2152	9.3338 min, 2.109 s	0.159	780
Phenol, 2-methyl-	1.15	108.07	XIC(108.07Â±500ppm)	554640	295	434	15.2509 min, 3.176 s	0.122	906
Benzaldehyde, 4-methyl-	1.13	91.07	XIC(91.07Â±500ppm)	429287	192	201	15.6676 min, 3.599 s	0.143	891
Levoglucosenone	1.06	68.04	XIC(68.04Â±500ppm)	3115311	337	613	17.8345 min, 4.723 s	0.157	882
Phenol, 2,4-dimethyl-	1.15	107.05	XIC(107.05Â±500ppm)	1754547	819	825	19.5013 min, 3.272 s	0.122	868
Phenol, 2,4-dichloro-	1.13	161.97	XIC(161.97Â±500ppm)	1207712	548	799	20.2513 min, 3.427 s	0.125	920
Benzene, 1,2,4-trichloro-	0.97	179.93	XIC(179.94Â±500ppm)	570056	170	729	20.5847 min, 3.339 s	0.107	818
Sulfurous acid, hexyl 2-propyl ester	1.24	85.07	XIC(85.07Â±500ppm)	177336	102	88	21.4181 min, 2.282 s	0.085	724
2-Cyclohexen-1-one, 3,5-dimethyl-, O-methyloxime	1.25	43.04	XIC(43.04Â±500ppm)	12083511	816	551	21.7515 min, 3.294 s	0.151	703
1,4:3,6-Dianhydro-a-d-glucopyranose	1.15	69.05	XIC(69.05Â±500ppm)	1913397	529	405	22.1682 min, 4.827 s	0.18	822
1,3-Butadiene, 1,1,2,3,4,4-hexachloro-:2	1.01	224.85	XIC(224.85Â±500ppm)	208536	147	302	22.5015 min, 2.758 s	0.125	915
2,3-Anhydro-d-mannosan	1.07	71.02	XIC(71.02Â±500ppm)	590688	187	334	22.9182 min, 4.858 s	0.157	813
Methyl-a-d-ribofuranoside	1.11	57.05	XIC(57.05Â±500ppm)	9403915	1886	1358	24.335 min, 4.872 s	0.169	752
7-Tetradecene, (E)-	0.52	43.07	XIC(43.07Â±500ppm)	1209520	195	102	24.5017 min, 1.903 s	0.164	754
Phenol, 4-chloro-3-methyl-	1.14	107.05	XIC(107.05Â±500ppm)	3489113	1259	1139	25.9185 min, 3.546 s	0.122	942
1,3-Di-O-acetyl-a-ÃŸ-d-ribopyranose	1.08	43.04	XIC(43.04Â±500ppm)	1523931	148	113	26.2518 min, 4.089 s	0.143	714
Phenol, 2,4,6-trichloro-	1.26	44.01	XIC(195.93Â±500ppm)	948453	410	812	28.502 min, 3.587 s	0.118	840
Benzene, 2,4-diisocyanato-1-methyl-	1.09	44.01	XIC(44.01Â±500ppm)	614834	181	12	28.5853 min, 3.062 s	0.091	868
Phenol, 2,4,5-trichloro-	1.16	44.01	XIC(195.93Â±500ppm)	1566333	499	1057	28.6687 min, 3.599 s	0.118	835
Eugenol	1.09	164.09	XIC(164.09Â±500ppm)	347272	194	363	28.8354 min, 3.455 s	0.11	855
Naphthalene, 2-chloro-	1.06	162.03	XIC(162.03Â±500ppm)	497955	212	622	29.3354 min, 3.984 s	0.12	856
Vanillin	1.12	151.05	XIC(151.05Â±500ppm)	8731371	1033	2396	30.5022 min, 4.583 s	0.145	918
Phenol, 2-methoxy-4-(1-propenyl)-	0.26	44.01	XIC(44.01Â±500ppm)	2250844	812	41	32.669 min, 3.616 s	0.115	892
Phenol, 2-methoxy-4-propyl-	1.09	137.07	XIC(137.07Â±500ppm)	2859963	469	1285	33.0024 min, 4.404 s	0.138	850
ÃŸ-D-Glucopyranose, 1,6-anhydro-	0.99	60.04	XIC(60.04Â±500ppm)	101083846	14405	5771	33.5024 min, 5.583 s	0.19	897
6-Methoxy-3-methylbenzofuran	1.09	147.05	XIC(147.05Â±500ppm)	4122268	692	1265	34.0024 min, 4.136 s	0.136	742
Apocynin	1.12	151.05	XIC(151.05Â±500ppm)	2250878	575	1135	34.0858 min, 4.433 s	0.139	904
1-Pentadecene	0.82	43.07	XIC(43.07Â±500ppm)	2580850	550	183	34.4191 min, 1.951 s	0.063	928
2H-1-Benzopyran-2-one, 3,4-dihydro-6-hydroxy-	1.03	122.04	XIC(122.04Â±500ppm)	426691	175	266	35.2525 min, 5.082 s	0.143	780
Benzoic acid, 4-hydroxy-3-methoxy-, methyl ester	1.04	151.05	XIC(151.05Â±500ppm)	337947	148	202	35.4192 min, 4.086 s	0.129	790
Benzene, 1,2,3-trimethoxy-5-methyl-	1.08	167.08	XIC(167.08Â±500ppm)	5190962	1128	2129	35.7526 min, 3.752 s	0.123	761
2,3-Anhydro-d-galactosan	1.09	43.04	XIC(43.04Â±500ppm)	6924338	1014	475	35.7526 min, 4.872 s	0.174	740
2-Propanone, 1-(4-hydroxy-3-methoxyphenyl)-	1.08	137.07	XIC(137.07Â±500ppm)	5538513	912	2034	35.9193 min, 4.301 s	0.134	853
Phenol, 4-nitro-	1	65.05	XIC(65.05Â±500ppm)	758277	231	202	36.0859 min, 4.341 s	0.13	847
2,6-Dimethoxybenzoquinone	1.06	69.02	XIC(69.02Â±500ppm)	15294323	1041	2110	37.2527 min, 5.852 s	0.166	937
Orcinol, 2TMS derivative	1.13	253.05	XIC(253.05Â±500ppm)	113382	101	160	37.336 min, 2.752 s	0.105	703
3,4-Altrosan	1.06	43.04	XIC(43.04Â±500ppm)	10253043	683	509	37.4194 min, 4.700 s	0.165	702
1,6-Anhydro-ÃŸ-D-glucofuranose	1.17	73.04	XIC(73.04Â±500ppm)	718147	158	202	37.5027 min, 5.396 s	0.163	801
4-(1-Hydroxyallyl)-2-methoxyphenol	1.06	137.07	XIC(137.07Â±500ppm)	2723516	709	1075	37.5861 min, 4.353 s	0.134	915
Butyrovanillone	1.18	151.05	XIC(151.05Â±500ppm)	1406359	579	847	38.0861 min, 4.174 s	0.136	844
1,6:2,3-Dianhydro-4-O-acetyl-ÃŸ-d-gulopyranose	1.06	43.04	XIC(43.04Â±500ppm)	16094540	722	743	38.0861 min, 4.759 s	0.152	713
Benzene, 1-chloro-4-phenoxy-	1.05	204.04	XIC(204.04Â±500ppm)	224174	179	351	38.1694 min, 3.808 s	0.111	783
4-Hydroxy-1-indanone	0.96	91.06	XIC(91.06Â±500ppm)	576473	193	91	38.6695 min, 5.117 s	0.18	838
Phenol, 2,6-dimethoxy-4-(2-propenyl)-	1.07	194.1	XIC(194.10Â±500ppm)	1641566	669	1056	38.7528 min, 3.774 s	0.123	901
Benzaldehyde, 3,4,5-trimethoxy-	1.07	196.08	XIC(196.08Â±500ppm)	385687	162	318	38.7528 min, 4.320 s	0.134	799
Homosyringaldehyde	1.14	44.01	XIC(44.01Â±500ppm)	3587979	936	58	39.0028 min, 3.564 s	0.118	763
3,4,5-Trimethoxyphenol	1.07	169.06	XIC(169.06Â±500ppm)	1583852	293	687	39.0028 min, 4.420 s	0.133	846
2(3H)-Benzofuranone, 3-methyl-	1.14	120.06	XIC(120.06Â±500ppm)	496080	253	243	39.0862 min, 5.029 s	0.157	862
2(3H)-Naphthalenone, 4,4a,5,6-tetrahydro-7-methyl-	0.96	162.07	XIC(162.07Â±500ppm)	283758	115	227	39.7529 min, 4.943 s	0.141	789
Benzenepropanol, 4-hydroxy-3-methoxy-	1.08	137.07	XIC(137.07Â±500ppm)	8341025	998	2300	40.3363 min, 4.177 s	0.132	890
Dodecane, 4,9-dipropyl-	0.53	57.09	XIC(57.09Â±500ppm)	1612473	191	460	40.503 min, 1.952 s	0.074	843
Idosan triacetate	1.09	43.04	XIC(43.04Â±500ppm)	4677617	317	290	40.753 min, 4.208 s	0.14	741
1,2,3,4-Cyclopentanetetrol, (1a,2ÃŸ,3ÃŸ,4a)-	0.52	73.05	XIC(73.05Â±500ppm)	738509	131	207	40.9197 min, 1.510 s	0.227	706
2-Allyl-1,4-dimethoxy-3-methyl-benzene	1.08	192.09	XIC(192.09Â±500ppm)	1070125	366	612	41.3364 min, 4.331 s	0.136	714
ÃŸ-D-Glucopyranose, 1,6-anhydro-, triacetate	1.04	43.04	XIC(43.04Â±500ppm)	3096527	351	292	42.0864 min, 4.157 s	0.132	747
Hexadecyl octyl ether	1.05	57.09	XIC(57.09Â±500ppm)	1621004	128	356	42.5865 min, 1.857 s	0.089	821
Phenol, pentachloro-	1.15	265.85	XIC(265.85Â±500ppm)	1687646	584	1510	44.0032 min, 3.919 s	0.123	951
Tetradecane, 4-ethyl-	1.7	43.07	XIC(43.07Â±500ppm)	1422650	221	117	44.0866 min, 1.832 s	0.125	783
1-Undecene, 5-methyl-	0.77	56.08	XIC(56.08Â±500ppm)	735155	101	152	44.3366 min, 1.897 s	0.057	839
Cyclobutane, 1-hexyl-2,3-dimethyl-	1.11	56.08	XIC(56.08Â±500ppm)	532516	115	157	44.5866 min, 1.903 s	0.059	741
Benzoic acid, 4-hydroxy-3,5-dimethoxy-, hydrazide	1.14	181.06	XIC(181.06Â±500ppm)	5171779	764	1673	44.7533 min, 4.233 s	0.131	769
Syringylacetone	1.06	167.07	XIC(167.07Â±500ppm)	80222441	2977	9046	44.7533 min, 4.324 s	0.138	850
3,5-Dimethoxy-4-hydroxycinnamaldehyde	1.03	208.08	XIC(208.08Â±500ppm)	488293	198	265	45.8367 min, 4.399 s	0.139	721
Allo-Inositol	2.45	73.05	XIC(73.05Â±500ppm)	967184	110	374	46.0867 min, 6.039 s	0.047	712
trans-Sinapyl alcohol	1.08	167.08	XIC(167.08Â±500ppm)	9220258	1342	3072	46.3368 min, 4.288 s	0.132	795
1-Propanone, 1-(4-hydroxy-3,5-dimethoxyphenyl)-	1.24	181.06	XIC(181.06Â±500ppm)	24984084	1573	5118	46.5868 min, 4.057 s	0.148	847
9H-Carbazole-9-methanol	1.13	167.08	XIC(167.08Â±500ppm)	909541	499	422	46.7535 min, 4.986 s	0.144	835
(E)-methyl 3-(3-hydroxy-4-methoxyphenyl)acrylate	1.07	208.09	XIC(208.09Â±500ppm)	373986	155	106	47.0035 min, 3.920 s	0.116	761
2-Propenal, 3-[4-(acetyloxy)-3-methoxyphenyl]-	1.2	43.04	XIC(43.04Â±500ppm)	458227	129	46	47.5869 min, 4.227 s	0.118	745
5-Undecene, 3-methyl-, (Z)-	0.98	70.09	XIC(70.09Â±500ppm)	484825	213	182	48.6703 min, 1.870 s	0.058	838
1H-Phenalen-1-one	1.13	152.07	XIC(152.07Â±500ppm)	829823	180	402	48.6703 min, 5.440 s	0.147	917
5-(3-Hydroxypropyl)-2,3-dimethoxyphenol	1.04	168.08	XIC(168.08Â±500ppm)	4959540	733	1846	48.837 min, 4.063 s	0.122	847
2-n-Octylfuran	1.09	81.04	XIC(81.04Â±500ppm)	251868	109	123	49.2537 min, 2.123 s	0.063	772
Hexacosylamine, N,N-dimethyl-	1.09	58.08	XIC(58.08Â±500ppm)	1694728	755	490	49.4203 min, 1.887 s	0.056	886
Phthalic acid, butyl oct-3-yl ester	1.29	149.03	XIC(149.03Â±500ppm)	512227	275	270	49.7537 min, 2.963 s	0.105	749
Pyrrolo[1,2-a]pyrazine-1,4-dione, hexahydro-3-(2-methylpropyl)-	1.01	70.08	XIC(70.08Â±500ppm)	441329	121	127	49.7537 min, 4.556 s	0.132	777
5,10-Diethoxy-2,3,7,8-tetrahydro-1H,6H-dipyrrolo[1,2-a:1',2'-d]pyrazine	2.09	70.07	XIC(70.07Â±500ppm)	1438276	439	427	50.0037 min, 5.800 s	0.186	776
Phthalic acid, 4-methylpent-2-yl nonyl ester	2.92	149.03	XIC(149.03Â±500ppm)	272427	115	163	51.4205 min, 2.798 s	0.092	712
trans-Sinapaldehyde	1.04	208.08	XIC(208.08Â±500ppm)	27509393	2899	4315	51.5872 min, 4.206 s	0.136	860
Diamyl phthalate	1.15	149.03	XIC(149.03Â±500ppm)	3185963	1650	1434	52.4206 min, 2.790 s	0.096	784
Naphthalic anhydride	1.11	126.06	XIC(126.06Â±500ppm)	301103	132	191	52.9206 min, 5.504 s	0.156	914
Sulfurous acid, dodecyl hexyl ester	5.64	57.09	XIC(57.09Â±500ppm)	277222	156	90	53.004 min, 1.738 s	0.112	826
Phthalic acid, 2-methylbutyl pentyl ester	1.15	149.03	XIC(149.03Â±500ppm)	1317480	478	681	53.4207 min, 2.801 s	0.092	796
Fluoranthene	1.33	202.08	XIC(202.08Â±500ppm)	4976305	1705	1395	53.6707 min, 4.507 s	0.142	937
2-((Pent-4-enyloxy)carbonyl)benzoic acid	1.12	149.03	XIC(149.03Â±500ppm)	689609	351	394	54.3374 min, 3.246 s	0.102	760
1,1'-Biphenyl, 5-hydroxy-3,4'-dimethoxy-	1.1	230.11	XIC(230.11Â±500ppm)	1460344	730	1288	54.4207 min, 3.971 s	0.121	714
Pyrene	1.16	202.09	XIC(202.09Â±500ppm)	1033858	378	692	54.4207 min, 4.575 s	0.139	935
Phthalic acid, butyl pent-4-enyl ester	1.05	149.03	XIC(149.03Â±500ppm)	1870346	1134	1068	55.8375 min, 3.241 s	0.103	797
2-((3-Methylbut-3-enyloxy)carbonyl)benzoic acid	1.01	149.03	XIC(149.03Â±500ppm)	445863	339	295	56.5042 min, 3.089 s	0.093	729
3,4,5-Trimethoxy-B-Nitrostyrene	2.81	41.04	XIC(41.04Â±500ppm)	12434385	970	550	56.9209 min, 3.835 s	0.155	743
Dodecane, 2-methyl-	1.54	57.09	XIC(57.09Â±500ppm)	961184	188	223	57.171 min, 1.718 s	0.095	832
Benzo[b]naphtho[2,3-d]furan	1.82	218.08	XIC(218.08Â±500ppm)	339920	114	86	57.171 min, 4.355 s	0.146	825
2-Undecene, 3-methyl-, (E)-	1	70.09	XIC(70.09Â±500ppm)	754311	253	320	57.921 min, 1.782 s	0.052	749
1-Hexadecanol, acetate	1.11	43.06	XIC(43.06Â±500ppm)	501467	121	72	58.5044 min, 1.951 s	0.056	841
?-Tetradecalactone	0.83	85.03	XIC(85.03Â±500ppm)	671425	231	384	61.338 min, 2.498 s	0.075	777
2-Propanone, 1-hydroxy-3-(4-hydroxy-3-methoxyphenyl)-	1.02	137.06	XIC(137.06Â±500ppm)	5536932	971	2930	61.588 min, 3.847 s	0.114	794
Oxalic acid, cyclohexyl nonyl ester	1.1	83.04	XIC(83.04Â±500ppm)	1228175	539	539	62.0047 min, 2.307 s	0.067	729
Acetamide, 2-(4-hydroxy-3-methoxyphenyl)-	0.97	137.06	XIC(137.06Â±500ppm)	1249716	538	925	62.2547 min, 3.793 s	0.112	756
Benzo[ghi]fluoranthene	1.2	226.08	XIC(226.08Â±500ppm)	868053	212	607	63.0048 min, 4.521 s	0.131	914
Benz[a]anthracene	1.32	228.1	XIC(228.10Â±500ppm)	734343	262	508	64.5882 min, 4.377 s	0.127	898
Benz[a]anthracene:2	1.43	228.1	XIC(228.10Â±500ppm)	1031254	956	544	64.8382 min, 4.496 s	0.143	930
Octane-3,6-dimethyl-1,8-bis-(2-oxytetrahydro-2H-pyranyl)	1.02	85.07	XIC(85.07Â±500ppm)	377336	208	192	66.8384 min, 1.857 s	0.053	766
dl-Alanyl-l-alanine	2.32	44.01	XIC(44.01Â±500ppm)	26480106	118	599	68.7552 min, 1.827 s	0.039	750
(E)-3,3'-Dimethoxy-4,4'-dihydroxystilbene	1.22	272.11	XIC(272.11Â±500ppm)	412922	133	469	69.8386 min, 3.749 s	0.104	764
3-(3,4-Dimethoxyphenyl)-7-hydroxychromen-2-one	1.13	298.13	XIC(298.13Â±500ppm)	1431246	431	1555	70.5054 min, 3.538 s	0.103	758
Cyclohexane, hexadecyl-	0.9	83.09	XIC(83.09Â±500ppm)	399043	181	178	71.0054 min, 1.795 s	0.051	855
Heptane, 1,1-diphenyl-	1.08	167.08	XIC(167.08Â±500ppm)	821007	397	493	71.2554 min, 3.382 s	0.098	730
Phenol, 4,4'-methylenebis[2,6-dimethoxy-	1.22	320.14	XIC(320.14Â±500ppm)	197954	152	339	71.8388 min, 3.761 s	0.093	739
Heptacosanoic acid, methyl ester	1.03	74.04	XIC(74.04Â±500ppm)	323157	154	126	71.9221 min, 1.819 s	0.052	807
Benzo[k]fluoranthene	1.33	252.1	XIC(252.10Â±500ppm)	400322	201	393	72.2555 min, 4.390 s	0.135	929
Benzo[j]fluoranthene	1.14	44	XIC(252.11Â±500ppm)	414948	105	360	74.2557 min, 4.691 s	0.112	879
Cyclohexane, 1-methyl-2-pentyl-	0.37	97.1	XIC(97.10Â±500ppm)	563826	226	290	76.8392 min, 1.721 s	0.051	804
Stigmasta-3,5-diene	1.05	43.08	XIC(43.08Â±500ppm)	1214985	471	155	76.9225 min, 2.266 s	0.067	807
ÃŸ-SITOSTANYL ACETATE	1.13	43.07	XIC(43.07Â±500ppm)	1323145	525	144	78.5893 min, 2.409 s	0.071	769
E-2-Tetradecen-1-ol	0.19	43.07	XIC(43.07Â±500ppm)	1948088	750	251	78.756 min, 1.875 s	0.054	900
Cholesta-4,6-dien-3-ol, (3ÃŸ)-	1.02	43.08	XIC(43.08Â±500ppm)	1471554	494	191	79.2561 min, 2.568 s	0.075	803
ÃŸ-Sitosterol acetate	1.53	43.07	XIC(43.07Â±500ppm)	230968	199	36	79.5894 min, 2.566 s	0.09	835
Cyclohexane, 1-ethyl-1,4-dimethyl-, trans-	0.76	69.08	XIC(69.08Â±500ppm)	318650	108	103	79.7561 min, 1.796 s	0.078	731
Ethane, 1,2-dimethoxy-	1.72	45.04	XIC(45.04Â±500ppm)	1705976	131	287	81.6729 min, 5.970 s	0.058	811
Methane, nitroso-	1.31	45.03	XIC(45.03Â±500ppm)	1720968	137	271	83.9231 min, 5.980 s	0.057	747
ÃŸ-Sitosterol	1.04	43.07	XIC(43.07Â±500ppm)	5299262	772	353	84.1731 min, 3.595 s	0.108	907
Stigmastane, 3-oxo-	1.11	43.07	XIC(43.07Â±500ppm)	866188	205	91	85.1732 min, 3.977 s	0.123	792
Lupeol	0.24	43.06	XIC(43.06Â±500ppm)	212183	166	26	85.6732 min, 4.755 s	0.157	839
Stigmasta-3,5-dien-7-one	1.06	174.11	XIC(174.11Â±500ppm)	715934	407	875	86.0066 min, 4.436 s	0.129	806
Stigmast-4-en-3-one	1.09	43.07	XIC(43.07Â±500ppm)	644962	387	90	86.7567 min, 4.601 s	0.129	789
Oxalic acid, cyclohexylmethyl decyl ester	0.25	97.1	XIC(97.10Â±500ppm)	471245	196	283	87.2567 min, 2.636 s	0.083	807
9,19-Cyclolanostan-3-ol, acetate, (3ÃŸ)-	1.03	43.07	XIC(43.07Â±500ppm)	1851110	392	230	87.34 min, 4.936 s	0.145	783
Sulfurous acid, decyl 2-propyl ester	3.84	57.09	XIC(57.09Â±500ppm)	332028	143	97	88.7568 min, 2.548 s	0.138	779
Benzene, 1,1',1''-[1-(bromomethyl)-2-methoxy-1-ethanyl-2-ylidene]tris-	1.74	197.08	XIC(197.08Â±500ppm)	4755382	213	1118	93.1738 min, 6.148 s	0.07	775

## Sheet: Charcoal (PTFE9) 
Name	Tailing.Factor	Base.Mass	Quant.Masses	Area	Peak.S.N	Quant.S.N	R.T...min.	FWHH..s.	Similarity
Butane, 1-methoxy-	0.11	45.05	XIC(45.05Â±500ppm)	15773296	259	208	4.00004 min, 1.866 s	0.126	834
Borane, ethyldimethyl-	0.82	41.05	XIC(41.05Â±500ppm)	22158209	361	888	4.66676 min, 1.558 s	0.056	796
Cyclohexane, 1,2-dimethyl- (cis/trans)	1.31	55.07	XIC(55.07Â±500ppm)	350280645	10237	15380	5.08346 min, 1.591 s	0.145	888
1,2-Epoxy-3-propyl acetate	0.64	43.04	XIC(43.04Â±500ppm)	23436085	407	510	5.08346 min, 1.766 s	0.123	706
2-Pyrazoline, 1-isobutyl-3-methyl-	1.43	97.1	XIC(97.10Â±500ppm)	14102704	181	3969	5.1668 min, 1.574 s	0.049	740
1,5-Hexadien-3-ol	2.35	57.07	XIC(57.07Â±500ppm)	4847848	244	859	5.41682 min, 1.582 s	0.148	710
1H-Pyrazole, 4,5-dihydro-3,4,5-trimethyl-	1.15	97.1	XIC(97.10Â±500ppm)	30612682	141	7052	5.50016 min, 1.630 s	0.046	734
Furan, 2-methoxy-	0.22	55.07	XIC(55.07Â±500ppm)	3865710	591	481	5.50016 min, 2.081 s	0.111	851
Carbonocyanidic acid, ethyl ester	1.26	84.02	XIC(84.02Â±500ppm)	8071889	2773	1921	5.50016 min, 2.762 s	0.128	734
Thiophene, 2-hexyl-	0.66	97.1	XIC(97.10Â±500ppm)	7338211	455	2788	5.66684 min, 1.650 s	0.178	713
Propanedioic acid, propyl-	3.19	60.03	XIC(60.03Â±500ppm)	2314754	237	214	6.0002 min, 1.702 s	0.078	709
Formic acid, 2-methylpropyl ester	1.08	43.04	XIC(43.04Â±500ppm)	3289422	100	148	6.8336 min, 1.852 s	0.1	753
Acetic acid, heptyl ester	1.55	43.05	XIC(43.05Â±500ppm)	1675393	179	109	8.0837 min, 1.749 s	0.127	725
4-Cyclopentene-1,3-dione	1.12	96.02	XIC(96.02Â±500ppm)	3693300	804	1183	8.0837 min, 3.373 s	0.139	885
o-Xylene	1.15	91.05	XIC(91.05Â±500ppm)	4522804	771	747	8.33372 min, 2.368 s	0.13	885
1,3,5,7-Cyclooctatetraene	1.12	104.06	XIC(104.06Â±500ppm)	800223	263	259	8.5004 min, 2.459 s	0.117	844
2H-Pyran, 2-(bromomethyl)tetrahydro-	1.27	85.07	XIC(85.07Â±500ppm)	896830	327	473	8.58374 min, 2.053 s	0.124	749
2(5H)-Furanone	1.13	55.03	XIC(55.03Â±500ppm)	12101174	2229	1617	9.16712 min, 4.494 s	0.173	908
p-Benzoquinone	1.04	54.03	XIC(54.03Â±500ppm)	12411749	1160	1756	9.25046 min, 3.835 s	0.151	931
(1R)-2,6,6-Trimethylbicyclo[3.1.1]hept-2-ene	1.23	93.07	XIC(93.07Â±500ppm)	7791624	3181	1682	9.83384 min, 1.989 s	0.166	908
Octane, 2,3-dimethyl-	0.97	43.07	XIC(43.07Â±500ppm)	1536414	197	115	12.5007 min, 1.816 s	0.112	734
p-Benzoquinone, 2-methyl-	1.02	54.03	XIC(54.03Â±500ppm)	3036783	344	525	13.1674 min, 3.960 s	0.146	916
Heptane, 5-ethyl-2,2,3-trimethyl-	1.27	57.09	XIC(57.09Â±500ppm)	2922506	365	519	15.0843 min, 1.786 s	0.12	828
Benzene, n-butyl-	1.18	91.06	XIC(91.06Â±500ppm)	1674815	272	261	15.1676 min, 2.553 s	0.113	843
Phenol, 2-methyl-	3.76	44.01	XIC(44.01Â±500ppm)	446136	321	14	15.2509 min, 3.175 s	0.134	730
2-Heptene, 4-methyl-, (E)-	1.52	55.07	XIC(55.07Â±500ppm)	454168	144	88	15.3343 min, 1.764 s	0.164	707
1-Hexene, 3,3-dimethyl-	1.3	41.06	XIC(41.06Â±500ppm)	613860	196	65	16.6677 min, 1.871 s	0.171	760
Levoglucosenone	1.03	68.06	XIC(68.06Â±500ppm)	2097708	680	736	17.7511 min, 4.767 s	0.176	847
Nonane, 4,5-dimethyl-	1.09	57.09	XIC(57.09Â±500ppm)	966348	194	277	20.0013 min, 1.820 s	0.104	812
3-Pyridinol, 2,6-dimethyl-	1.24	123.07	XIC(123.07Â±500ppm)	2501436	1216	999	20.7514 min, 3.487 s	0.127	839
Carbon dioxide	1.5	44.01	XIC(44.01Â±500ppm)	3941571	110	71	21.4181 min, 3.633 s	0.052	812
Benzene, 1,2-dimethoxy-	1.08	123.05	XIC(123.05Â±500ppm)	609040	235	358	21.5014 min, 3.485 s	0.117	799
1,4:3,6-Dianhydro-a-d-glucopyranose	1.13	69.05	XIC(69.05Â±500ppm)	4662265	811	640	22.1682 min, 4.829 s	0.185	882
3,4-Anhydro-d-galactosan	0.76	43.04	XIC(43.04Â±500ppm)	689060	405	44	22.6682 min, 4.956 s	0.191	777
Benzofuran, 2,3-dihydro-	1.12	120.06	XIC(120.06Â±500ppm)	634369	316	334	22.7515 min, 3.554 s	0.117	754
2,3-Anhydro-d-mannosan	1.03	71.02	XIC(71.02Â±500ppm)	2211831	398	917	22.9182 min, 4.859 s	0.163	824
Carbonic acid, isobutyl 2-ethylhexyl ester	1.23	57.06	XIC(57.06Â±500ppm)	1029506	183	237	23.6683 min, 2.301 s	0.1	821
Methyl-a-d-ribofuranoside	1.1	57.05	XIC(57.05Â±500ppm)	2198044	573	462	24.335 min, 4.879 s	0.184	754
Sulfurous acid, 2-pentyl undecyl ester	0.85	71.09	XIC(71.09Â±500ppm)	816161	106	315	25.0851 min, 1.859 s	0.095	745
Resorcinol	1.13	110.04	XIC(110.04Â±500ppm)	7351318	1100	1649	25.8351 min, 3.981 s	0.13	935
trans-2-tert-Butylcyclohexanol, trifluoroacetate	0.22	44.01	XIC(44.01Â±500ppm)	217919	105	9	26.0018 min, 2.651 s	0.139	702
1H-Inden-1-one, 2,3-dihydro-3-methyl-	1.4	131.06	XIC(131.06Â±500ppm)	533226	218	233	26.9185 min, 4.283 s	0.154	827
3-Methoxy-5-methylphenol	1.07	138.07	XIC(138.07Â±500ppm)	301129	162	245	27.3352 min, 3.759 s	0.114	851
1-Naphthalenol	1.1	115.06	XIC(115.06Â±500ppm)	519240	290	192	27.5019 min, 4.327 s	0.14	862
1,3-Benzenediol, 2-methyl-	1.11	124.06	XIC(124.06Â±500ppm)	1510474	264	672	27.6686 min, 4.075 s	0.128	864
Tridecane, 2,2,4,10,12,12-hexamethyl-7-(3,5,5-trimethylhexyl)-	1.49	57.09	XIC(57.09Â±500ppm)	14492706	948	1655	28.1686 min, 1.855 s	0.113	788
Orcinol	1.12	124.06	XIC(124.06Â±500ppm)	3025411	578	1423	28.5853 min, 4.061 s	0.127	852
4-Decene, 2,2-dimethyl-, (Z)-	0.86	57.09	XIC(57.09Â±500ppm)	19834863	1151	2134	29.0854 min, 1.902 s	0.159	755
2-Methylheptanoic acid	1.01	74.05	XIC(74.05Â±500ppm)	2360522	309	452	29.9188 min, 4.877 s	0.159	744
Vanillin	1.12	151.05	XIC(151.05Â±500ppm)	3030310	1776	1449	30.5022 min, 4.582 s	0.151	922
1,3-Benzenediol, 2,5-dimethyl-	1.12	138.07	XIC(138.07Â±500ppm)	1331252	354	741	31.5022 min, 3.981 s	0.121	862
Methylparaben	1.24	121.03	XIC(121.03Â±500ppm)	629222	294	362	31.7523 min, 3.901 s	0.119	803
1,3-Benzenediol, 4-ethyl-	1.12	123.05	XIC(123.05Â±500ppm)	814801	309	495	32.0023 min, 3.977 s	0.125	753
4-Methylphthalic anhydride	1.08	118.05	XIC(118.05Â±500ppm)	826433	581	396	32.0856 min, 4.725 s	0.148	885
Pentadecane, 6-methyl-	1.95	57.09	XIC(57.09Â±500ppm)	3721405	1018	714	32.2523 min, 1.858 s	0.096	788
Ethanone, 1-(3-hydroxyphenyl)-	1.11	121.03	XIC(121.03Â±500ppm)	2612772	376	914	32.3356 min, 4.349 s	0.134	884
Phenol, 2-methoxy-4-(1-propenyl)-	1.15	164.09	XIC(164.09Â±500ppm)	285099	173	258	32.669 min, 3.617 s	0.125	830
1,4-Benzenedicarboxaldehyde, 2,5-dimethyl-	1.17	162.08	XIC(162.08Â±500ppm)	835289	348	505	32.8357 min, 3.850 s	0.133	753
Benzoic acid, 4-hydroxy-, hydrazide	1.7	121.03	XIC(121.03Â±500ppm)	837165	413	421	33.0024 min, 4.022 s	0.142	704
o-Cyanobenzoic acid	0.63	44.01	XIC(44.01Â±500ppm)	550998	340	20	33.0024 min, 5.220 s	0.166	853
ÃŸ-D-Glucopyranose, 1,6-anhydro-	0.94	60.04	XIC(60.04Â±500ppm)	467807521	2956	16231	33.6691 min, 5.532 s	0.211	907
Apocynin	1.12	151.05	XIC(151.05Â±500ppm)	3170670	1491	1257	34.0858 min, 4.432 s	0.14	880
1-Pentadecene	0.72	43.07	XIC(43.07Â±500ppm)	2402687	300	171	34.4191 min, 1.956 s	0.062	923
4-Hydroxy-2-methylacetophenone	1.15	135.05	XIC(135.05Â±500ppm)	626727	201	207	34.4191 min, 4.107 s	0.13	810
1-Octanol, 2-methyl-	0.98	57.09	XIC(57.09Â±500ppm)	1185950	131	298	35.0025 min, 1.897 s	0.147	817
4-Hydroxy-3-methylacetophenone	1.13	135.05	XIC(135.05Â±500ppm)	1358448	256	422	35.1692 min, 4.267 s	0.131	825
Pentanoic acid, 5-hydroxy-, 2,4-di-t-butylphenyl esters	1.1	191.15	XIC(191.15Â±500ppm)	503051	246	350	35.2525 min, 2.794 s	0.103	724
2H-1-Benzopyran-2-one, 3,4-dihydro-6-hydroxy-	1.13	122.04	XIC(122.04Â±500ppm)	521799	349	241	35.2525 min, 5.080 s	0.154	730
1,2-Dimethylbenzimidazole	0.54	44.01	XIC(44.01Â±500ppm)	903907	335	20	35.2525 min, 5.319 s	0.17	773
Benzo[b]thiophene, 3,5-dimethyl-	0.92	162.08	XIC(162.08Â±500ppm)	666235	191	516	35.3359 min, 3.965 s	0.118	731
Benzene, 1,2,3-trimethoxy-5-methyl-	1.06	167.08	XIC(167.08Â±500ppm)	4463154	1078	1911	35.7526 min, 3.756 s	0.124	755
2-Propanone, 1-(4-hydroxy-3-methoxyphenyl)-	1.08	137.07	XIC(137.07Â±500ppm)	7601722	946	2325	35.9193 min, 4.309 s	0.135	834
3,4-Altrosan	8.36	43.04	XIC(43.04Â±500ppm)	3844197	196	206	36.0026 min, 4.465 s	0.128	752
2-O-Methyl-D-mannopyranosa	1.05	87.05	XIC(87.05Â±500ppm)	14664502	705	2862	36.2526 min, 5.287 s	0.161	741
2H-1-Benzopyran-2-one, 8-hydroxy-	1.07	134.05	XIC(134.05Â±500ppm)	1033693	710	552	36.9193 min, 5.236 s	0.159	903
1H-1,3-Benzimidazole, 5-methoxy-1-methyl-2-(4-morpholinylmethyl)-	1.37	176.09	XIC(176.09Â±500ppm)	282978	141	202	37.086 min, 3.760 s	0.111	712
Octane, 2,7-dimethyl-	1.57	57.09	XIC(57.09Â±500ppm)	2324121	321	343	37.1694 min, 1.853 s	0.092	842
2,6-Dimethoxybenzoquinone	1.09	69.02	XIC(69.02Â±500ppm)	2866166	1030	637	37.2527 min, 5.853 s	0.186	909
1,6-Anhydro-a-d-galactofuranose	1.05	73.04	XIC(73.04Â±500ppm)	8088596	535	1144	37.5027 min, 5.410 s	0.16	861
4-(1-Hydroxyallyl)-2-methoxyphenol	1.02	137.07	XIC(137.07Â±500ppm)	694042	229	364	37.5861 min, 4.356 s	0.133	874
2,5,6-Trimethylbenzimidazole	2.37	160.11	XIC(160.11Â±500ppm)	753073	226	308	37.6694 min, 4.968 s	0.163	760
1,6-Anhydro-ÃŸ-D-glucofuranose	0.44	44.01	XIC(44.01Â±500ppm)	1717045	333	36	37.7527 min, 5.287 s	0.178	825
1-Propanone, 1-(4-hydroxy-3-methoxyphenyl)-	1.35	151.05	XIC(151.05Â±500ppm)	1564339	291	648	37.8361 min, 4.179 s	0.148	768
Butyrovanillone	0.99	151.05	XIC(151.05Â±500ppm)	1037976	240	590	38.0861 min, 4.175 s	0.127	801
1,6:2,3-Dianhydro-4-O-acetyl-ÃŸ-d-gulopyranose	1.05	43.04	XIC(43.04Â±500ppm)	38240612	3031	1251	38.0861 min, 4.762 s	0.16	708
Cyclohexane, 1,2,3,4,5,6-hexaethyl-	0.73	55.08	XIC(55.08Â±500ppm)	688191	113	102	38.5028 min, 1.978 s	0.123	733
4-Hydroxy-1-indanone	1.11	91.06	XIC(91.06Â±500ppm)	1998436	275	225	38.6695 min, 5.117 s	0.147	898
Phenol, 2,6-dimethoxy-4-(2-propenyl)-	1.2	194.11	XIC(194.11Â±500ppm)	854291	349	590	38.7528 min, 3.772 s	0.113	839
1,3-Dioxolane-2-propanal, 2-methyl-	0.94	43.04	XIC(43.04Â±500ppm)	4169837	451	238	38.7528 min, 4.492 s	0.144	756
Homosyringaldehyde	1.13	167.08	XIC(167.08Â±500ppm)	437721	321	314	38.9195 min, 3.592 s	0.117	751
1-Naphthalenol, 2-methyl-	0.96	158.08	XIC(158.08Â±500ppm)	1301599	233	657	38.9195 min, 4.383 s	0.137	907
5-Hydroxy-3-methyl-1-indanone	1.05	147.06	XIC(147.06Â±500ppm)	669237	168	306	39.3362 min, 4.673 s	0.143	747
6-Hydroxy-4-methylcoumarin	1.14	176.06	XIC(176.06Â±500ppm)	1078554	393	540	39.6696 min, 4.765 s	0.145	819
2H-1-Benzopyran-2-one, 3,4-dihydro-6-methyl-	1.14	162.07	XIC(162.07Â±500ppm)	1129782	433	587	39.7529 min, 4.935 s	0.162	823
7-Methyl-1-naphthol	1	158.08	XIC(158.08Â±500ppm)	5644367	355	1503	39.9196 min, 4.579 s	0.14	713
Idosan triacetate	1.22	43.04	XIC(43.04Â±500ppm)	6219186	397	369	40.2529 min, 4.056 s	0.139	739
Benzenepropanol, 4-hydroxy-3-methoxy-	1.2	137.07	XIC(137.07Â±500ppm)	1237830	322	554	40.3363 min, 4.179 s	0.129	791
1(2H)-Acenaphthylenone	0.86	44	XIC(44.00Â±500ppm)	858614	149	24	40.4196 min, 5.140 s	0.135	749
Cyclohexadecane	1.01	69.08	XIC(69.08Â±500ppm)	816949	262	305	40.5863 min, 2.074 s	0.068	866
2(3H)-Naphthalenone, 4,4a,5,6-tetrahydro-7-methyl-	1.25	162.07	XIC(162.07Â±500ppm)	578730	218	355	40.8363 min, 4.868 s	0.153	756
7-Hydroxy-1-indanone	1.07	148.06	XIC(148.06Â±500ppm)	1017882	380	442	41.0863 min, 5.181 s	0.155	763
Methyl 3-(4-hydroxy-3-methoxyphenyl)propanoate	1.12	137.07	XIC(137.07Â±500ppm)	373345	141	180	41.503 min, 3.923 s	0.109	744
2-Methylhexadec-1-ene	1.06	56.08	XIC(56.08Â±500ppm)	1457697	244	314	41.7531 min, 1.938 s	0.062	866
9H-Fluorene, 4-methyl-	1	165.08	XIC(165.08Â±500ppm)	335065	144	198	41.9197 min, 4.055 s	0.111	867
ÃŸ-D-Glucopyranose, 1,6-anhydro-, triacetate	1.12	43.04	XIC(43.04Â±500ppm)	4292376	448	405	42.0864 min, 4.158 s	0.133	720
p-Hydroxybiphenyl	1.08	170.08	XIC(170.08Â±500ppm)	1150108	433	682	42.2531 min, 4.364 s	0.131	766
1-Naphthol, 6,7-dimethyl-	1.12	172.1	XIC(172.10Â±500ppm)	699912	168	423	42.6698 min, 4.160 s	0.134	818
Benzaldehyde, 2-hydroxy-3-(2-propenyl)-	1.02	134.08	XIC(134.08Â±500ppm)	785772	258	390	42.6698 min, 4.810 s	0.146	753
5-Benzofurancarboxaldehyde, 2,3-dihydro-2-methyl-	1.04	162.08	XIC(162.08Â±500ppm)	1518234	218	591	43.0032 min, 4.765 s	0.138	791
Methyl tetradecanoate	1.19	74.04	XIC(74.04Â±500ppm)	310863	152	114	43.1698 min, 2.233 s	0.069	841
9H-Fluoren-9-one	1.33	180.07	XIC(180.07Â±500ppm)	2892401	1182	1025	43.2532 min, 4.751 s	0.155	952
2-Hexyl-1-octanol	1.95	57.09	XIC(57.09Â±500ppm)	3181504	464	479	43.3365 min, 1.849 s	0.092	840
Benzofuran, 3-methyl-2-(1-methylethenyl)-	2.37	172.1	XIC(172.10Â±500ppm)	1989207	202	741	43.5032 min, 4.243 s	0.132	768
7H-Cyclopenta[a]pentalen-7-one, 1,2,3,3a,4,5,6,7a-octahydro-	1.25	162.08	XIC(162.08Â±500ppm)	419453	122	213	43.8366 min, 4.909 s	0.145	707
Acetophenone, 3'-allyl-4'-hydroxy-	0.87	161.07	XIC(161.07Â±500ppm)	578447	166	352	44.0032 min, 4.412 s	0.13	707
4H-1-Benzopyran-4-one, 6-hydroxy-2-methyl-	1.17	136.02	XIC(136.02Â±500ppm)	735022	304	388	44.0032 min, 5.150 s	0.152	714
2-Dibenzofuranol	1.09	184.06	XIC(184.06Â±500ppm)	1730948	419	1003	44.1699 min, 4.455 s	0.136	896
3,4-Dihydrocoumarin, 7,8-dimethyl-	1.11	176.09	XIC(176.09Â±500ppm)	541264	148	359	44.1699 min, 4.653 s	0.14	723
Naphtho[2,1-b]furan, 1,2-dimethyl-	1.07	196.1	XIC(196.10Â±500ppm)	387827	219	307	44.5033 min, 3.873 s	0.134	743
Cyclopropane, 1-heptyl-2-methyl-	1.29	56.08	XIC(56.08Â±500ppm)	500358	121	125	44.5866 min, 1.903 s	0.061	790
Benzoic acid, 4-hydroxy-3,5-dimethoxy-, hydrazide	1.14	181.06	XIC(181.06Â±500ppm)	1746780	399	785	44.7533 min, 4.231 s	0.132	759
Syringylacetone	1.05	167.08	XIC(167.08Â±500ppm)	22536729	2075	5421	44.7533 min, 4.319 s	0.135	868
9H-Fluorene, 9-methylene-	1.15	178.09	XIC(178.08Â±500ppm)	2175553	517	1089	45.0033 min, 4.559 s	0.14	881
Benzofuran, 5-methoxy-6,7-dimethyl-	0.94	161.07	XIC(161.07Â±500ppm)	731770	175	386	45.0867 min, 4.531 s	0.135	721
4-Cyclohepta-2,4,6-trienyl-phenol	1.67	184.1	XIC(184.10Â±500ppm)	582875	187	360	45.3367 min, 4.157 s	0.135	759
3-Biphenylmethanol	1.33	184.1	XIC(184.10Â±500ppm)	794431	339	488	45.67 min, 4.065 s	0.127	775
7-Tetradecene	2.7	55.07	XIC(55.07Â±500ppm)	636867	179	118	45.9201 min, 1.871 s	0.125	762
Benzo[g]isoquinoline	1.53	179.08	XIC(179.08Â±500ppm)	1982499	340	492	46.1701 min, 4.935 s	0.208	819
Pentamethylbenzaldehyde	1.14	176.09	XIC(176.09Â±500ppm)	702671	223	409	46.4201 min, 4.599 s	0.141	721
Benzeneacetic acid, 4-hydroxy-3,5-dimethoxy-, methyl ester	1.29	167.08	XIC(167.08Â±500ppm)	521675	225	326	46.5034 min, 4.143 s	0.127	796
1-Propanone, 1-(4-hydroxy-3,5-dimethoxyphenyl)-	1.23	181.06	XIC(181.06Â±500ppm)	7382596	2439	2097	46.5868 min, 4.053 s	0.141	860
Pentadecanoic acid, methyl ester	0.52	74.04	XIC(74.04Â±500ppm)	250193	118	109	46.6701 min, 2.160 s	0.062	776
9H-Carbazole-9-methanol	1.11	167.08	XIC(167.08Â±500ppm)	17158011	3434	3967	46.7535 min, 4.990 s	0.154	914
Cyclo(L-prolyl-L-valine)	0.99	70.08	XIC(70.08Â±500ppm)	967684	183	238	46.7535 min, 5.266 s	0.154	829
o-Phenanthroline	1.21	180.08	XIC(180.08Â±500ppm)	543394	261	274	46.9201 min, 5.207 s	0.158	837
Caffeine	1.56	194.09	XIC(194.09Â±500ppm)	1644752	758	667	47.0868 min, 5.255 s	0.172	884
2-Fluorenecarboxaldehyde	1.72	194.08	XIC(194.08Â±500ppm)	419611	185	235	47.4202 min, 4.362 s	0.134	785
Xanthone	1.14	196.06	XIC(196.06Â±500ppm)	503181	248	293	47.4202 min, 4.688 s	0.148	805
4-Phenoxybenzaldehyde	1.15	198.08	XIC(198.08Â±500ppm)	788140	196	428	47.5035 min, 4.133 s	0.129	770
2,3-Dihydro-1-oxo-1H-phenalene	1.38	153.08	XIC(153.08Â±500ppm)	257178	133	116	47.9202 min, 5.111 s	0.155	718
Anthrone	1.2	165.08	XIC(165.08Â±500ppm)	477783	122	222	48.3369 min, 4.524 s	0.139	845
1,4-Naphthalenedione, 2,3-dimethyl-	1.24	157.07	XIC(157.07Â±500ppm)	324247	176	175	48.4203 min, 5.474 s	0.168	725
2-Hydroxyfluorene	1.09	182.08	XIC(182.08Â±500ppm)	1220726	360	582	48.5036 min, 4.560 s	0.136	912
Anthracene, 2-methyl-	1.17	192.1	XIC(192.10Â±500ppm)	1407233	289	697	48.5869 min, 4.174 s	0.123	871
1H-Phenalen-1-one	1.13	152.08	XIC(152.08Â±500ppm)	4603206	1057	1249	48.6703 min, 5.442 s	0.167	942
9-Eicosene, (E)-	0.43	43.07	XIC(43.07Â±500ppm)	1680676	329	140	48.837 min, 1.858 s	0.063	932
Dihydrosyringenin	1.12	168.09	XIC(168.09Â±500ppm)	312013	144	205	48.837 min, 4.067 s	0.115	788
4,7-Phenanthroline	2.62	180.08	XIC(180.08Â±500ppm)	493059	222	249	48.837 min, 5.085 s	0.172	844
Undecanoic acid, ethyl ester	1.19	88.06	XIC(88.06Â±500ppm)	173796	128	138	48.9203 min, 2.091 s	0.061	748
6H-Cyclobuta[jk]phenanthrene	1.12	190.09	XIC(190.09Â±500ppm)	1530906	212	780	49.1703 min, 4.538 s	0.142	847
1-Tetradecyne	0.99	81.04	XIC(81.04Â±500ppm)	233793	105	116	49.2537 min, 2.124 s	0.065	731
9H-Carbazole, 2-methyl-	1.13	181.1	XIC(181.10Â±500ppm)	5951077	1136	1896	49.2537 min, 4.530 s	0.142	914
Methanone, (2-hydroxyphenyl)(4-hydroxyphenyl)-	0.95	214.08	XIC(214.08Â±500ppm)	372570	122	302	49.337 min, 4.156 s	0.127	773
Phenanthrene, 2-methyl-	1.23	192.1	XIC(192.10Â±500ppm)	1319117	564	639	49.5037 min, 4.343 s	0.14	878
Pyrrolo[1,2-a]pyrazine-1,4-dione, hexahydro-3-(2-methylpropyl)-	1.13	70.08	XIC(70.08Â±500ppm)	960334	216	224	49.7537 min, 4.558 s	0.136	734
Norharmane, N-methyl-	1.28	182.09	XIC(182.09Â±500ppm)	16518953	4178	1942	49.7537 min, 5.061 s	0.163	926
5,10-Diethoxy-2,3,7,8-tetrahydro-1H,6H-dipyrrolo[1,2-a:1',2'-d]pyrazine	1.7	70.08	XIC(70.08Â±500ppm)	3662122	935	847	50.0037 min, 5.806 s	0.181	793
4-Methylcarbazole	1.1	181.1	XIC(181.10Â±500ppm)	3698255	1215	1004	50.2537 min, 4.593 s	0.143	859
4-Hydroxy-9-fluorenone	1.66	196.06	XIC(196.06Â±500ppm)	1143120	307	509	50.3371 min, 4.911 s	0.156	881
9H-Carbazole, 9-methyl-	1.19	181.1	XIC(181.10Â±500ppm)	6314394	1707	1373	50.4204 min, 4.571 s	0.14	912
Benzaldehyde, 3-phenoxy-	1.39	198.08	XIC(198.08Â±500ppm)	3502846	402	997	50.6704 min, 4.166 s	0.159	711
4aH-carbazole, 6-methyl-	1.06	181.1	XIC(181.10Â±500ppm)	3104040	581	1018	50.8371 min, 4.806 s	0.142	925
9H-Pyrido[3,4-b]indole, 1-methyl-	1.32	182.09	XIC(182.09Â±500ppm)	16802673	2376	1678	51.0038 min, 4.807 s	0.153	919
9H-Pyrido[3,4-b]indole	1.29	168.08	XIC(168.08Â±500ppm)	3208908	502	928	51.0871 min, 5.416 s	0.172	873
Pinosylvin	1.13	212.1	XIC(212.10Â±500ppm)	1689612	378	995	51.1705 min, 3.854 s	0.123	706
trans-Sinapaldehyde	1.06	208.08	XIC(208.08Â±500ppm)	2281578	449	768	51.5872 min, 4.201 s	0.128	827
3,7-Dimethyldibenzothiophene	1.85	212.1	XIC(212.10Â±500ppm)	642984	280	455	51.7539 min, 3.836 s	0.131	718
Methane, di-p-tolyl-	1.16	181.08	XIC(181.08Â±500ppm)	540865	110	218	51.9205 min, 4.219 s	0.123	723
Phthalic acid, di(2-methylbutyl) ester	1.2	149.03	XIC(149.03Â±500ppm)	784845	353	343	52.0039 min, 2.827 s	0.097	774
Cycloeicosane	0.55	43.07	XIC(43.07Â±500ppm)	1805950	292	162	52.0872 min, 1.824 s	0.054	928
Diamyl phthalate	1.15	149.03	XIC(149.03Â±500ppm)	6406467	2803	2338	52.4206 min, 2.792 s	0.096	795
ÃŸ-Carboline, 1,2-dimethyl-	1.33	196.11	XIC(196.11Â±500ppm)	3253247	831	871	52.5039 min, 4.686 s	0.148	844
Carbazole, 1,3-dimethyl-	1.28	195.11	XIC(195.11Â±500ppm)	1110637	510	375	52.5873 min, 4.192 s	0.135	785
Benzo[c]cinnoline, 4-methyl-	0.97	165.09	XIC(165.09Â±500ppm)	393335	127	150	52.5873 min, 4.896 s	0.144	806
9H-Fluorene, 2-methoxy-	1.06	196.1	XIC(196.10Â±500ppm)	2789528	330	602	52.7539 min, 4.354 s	0.205	755
Perimidine, 2-ethyl-	1.17	195.1	XIC(195.10Â±500ppm)	2997931	327	722	52.9206 min, 4.386 s	0.135	779
Naphthalic anhydride	1.26	126.06	XIC(126.06Â±500ppm)	532691	292	230	52.9206 min, 5.508 s	0.174	915
Phthalic acid, isobutyl octyl ester	1.19	149.03	XIC(149.03Â±500ppm)	2504463	725	982	53.004 min, 2.788 s	0.092	809
Phenanthrene, 3,6-dimethyl-	1.4	206.12	XIC(206.12Â±500ppm)	1008281	385	505	53.004 min, 3.950 s	0.129	720
Naphthalene, 1,8-di-1-propynyl-	1.18	204.1	XIC(204.10Â±500ppm)	402807	136	306	53.004 min, 4.196 s	0.119	743
5,16[1',2']:8,13[1'',2'']-Dibenzenodibenzo[a,g]cyclododecene, 6,7,14,15-tetrahydro-	1.02	204.1	XIC(204.10Â±500ppm)	323377	140	164	53.254 min, 4.157 s	0.121	832
2,3,7,11-Tetraazatricyclo[7.4.0.0{2,6}]trideca-1(9),3,5,7,12-pentaen-10-one	1.15	186.05	XIC(186.05Â±500ppm)	3318339	1150	1122	53.5873 min, 5.597 s	0.177	724
3-Ethylcarbazole	1.12	180.09	XIC(180.09Â±500ppm)	4295446	839	1389	53.6707 min, 4.244 s	0.129	880
Fluoranthene	1.35	202.09	XIC(202.08Â±500ppm)	16928518	1215	3012	53.6707 min, 4.510 s	0.146	945
Carbazole, 2,3-dimethyl-	1.17	195.11	XIC(195.11Â±500ppm)	3632376	1731	1233	54.004 min, 4.291 s	0.137	872
1H-inden-1-one, 2-(2-furanylmethylene)-2,3-dihydro-	0.71	210.08	XIC(210.08Â±500ppm)	1057446	188	427	54.2541 min, 4.447 s	0.166	724
Pyrene	1.19	202.09	XIC(202.09Â±500ppm)	1053966	489	496	54.9208 min, 4.616 s	0.141	881
Phthalic acid, 8-bromoctyl pentyl ester	1.11	149.03	XIC(149.03Â±500ppm)	908189	301	473	55.0875 min, 2.678 s	0.087	743
Iminostilbene	1.13	193.1	XIC(193.10Â±500ppm)	650956	283	333	55.3375 min, 4.512 s	0.143	732
Benzo[b]naphtho[2,3-d]furan	1.3	218.08	XIC(218.08Â±500ppm)	3078912	709	1004	55.5042 min, 4.194 s	0.131	834
Xanthene, 9,9-dimethyl-	0.9	195.09	XIC(195.09Â±500ppm)	1511676	153	467	55.6708 min, 4.006 s	0.142	716
2-((Pent-4-enyloxy)carbonyl)benzoic acid	1.09	149.03	XIC(149.03Â±500ppm)	3391028	1562	1545	55.8375 min, 3.240 s	0.103	812
9-Phenanthrenol	1.04	165.08	XIC(165.08Â±500ppm)	1053259	177	285	55.8375 min, 4.782 s	0.143	844
3-Phenanthrol	1.12	194.08	XIC(194.08Â±500ppm)	3115309	623	937	56.1709 min, 4.769 s	0.184	807
11-Hexadecen-1-ol, (Z)-	0.79	41.06	XIC(41.06Â±500ppm)	187094	116	23	56.5876 min, 2.793 s	0.095	827
9H-Carbazole, 9-ethyl-3-methyl-	1.22	194.11	XIC(194.11Â±500ppm)	1233733	563	675	56.5876 min, 4.014 s	0.131	801
(4-Acetylphenyl)phenylmethane	0.58	195.09	XIC(195.09Â±500ppm)	490510	126	253	57.0043 min, 4.163 s	0.124	723
Pyrene, 1-methyl-	1.21	216.1	XIC(216.10Â±500ppm)	1387457	517	772	57.3376 min, 4.141 s	0.135	908
Carbazole, 2,4,7-trimethyl-	0.91	209.13	XIC(209.13Â±500ppm)	555844	120	293	57.5043 min, 4.110 s	0.119	721
7H-Benzo[c]fluorene	1.06	216.1	XIC(216.10Â±500ppm)	6928757	412	1738	58.171 min, 4.293 s	0.133	924
Pyrene, 2-methyl-	1.22	216.1	XIC(216.10Â±500ppm)	3022765	394	1006	58.7544 min, 4.360 s	0.143	914
9-Ethyl-10-methylanthracene	1.1	220.13	XIC(220.13Â±500ppm)	362408	118	256	58.8378 min, 3.922 s	0.125	710
2H-Phenanthro[9,10-b]pyran	1.5	232.1	XIC(232.10Â±500ppm)	685847	230	573	59.1711 min, 3.915 s	0.12	728
5-Methyl-3-phenyl-1H-indazole	1.05	208.1	XIC(208.10Â±500ppm)	453934	121	194	59.3378 min, 4.402 s	0.156	774
4,4'-Oxydibenzonitrile	1.21	220.07	XIC(220.07Â±500ppm)	2158472	793	732	59.5878 min, 4.963 s	0.158	731
4-Stilbene carboxaldehyde	1.17	208.1	XIC(208.10Â±500ppm)	607940	172	263	60.0879 min, 4.536 s	0.137	797
Anthra[1,9-cd]pyrazol-6(2H)-one	1.35	220.06	XIC(220.06Â±500ppm)	759981	280	367	60.1712 min, 4.984 s	0.172	771
5(4H)-Thebenidinone	1.2	219.08	XIC(219.08Â±500ppm)	505734	149	184	60.6712 min, 4.820 s	0.145	764
1,1'-Bicyclopentyl	0.86	82.08	XIC(82.08Â±500ppm)	201135	108	93	60.7546 min, 1.790 s	0.064	737
o-Terphenyl	1.82	230.12	XIC(230.12Â±500ppm)	345093	149	245	60.8379 min, 3.849 s	0.12	770
phenol, 4,4'-[dithiobis(methylene)]bis[2-methoxy-	1.06	137.06	XIC(137.06Â±500ppm)	6563606	1529	3182	61.588 min, 3.853 s	0.114	781
5,6-Dihydrochrysene	1.31	230.12	XIC(230.12Â±500ppm)	694212	169	491	61.588 min, 4.006 s	0.139	812
Eicosanoic acid, methyl ester	1.08	74.04	XIC(74.04Â±500ppm)	1310121	1193	530	61.838 min, 1.932 s	0.057	906
5H-Benzo[4,5]imidazo[2,1-a]isoquinolin-6-one	1.2	234.09	XIC(234.09Â±500ppm)	2015080	863	826	61.9213 min, 4.501 s	0.144	797
Oxalic acid, cyclohexyl dodecyl ester	1.08	83.04	XIC(83.04Â±500ppm)	202434	120	120	62.0047 min, 2.309 s	0.07	786
Pyrene, 1,3-dimethyl-	2.4	230.12	XIC(230.12Â±500ppm)	363576	140	192	62.0047 min, 3.963 s	0.133	774
Guaiacol, 4-butyl-	1.04	137.07	XIC(137.07Â±500ppm)	2163448	698	1075	62.2547 min, 3.793 s	0.111	770
Benzo[ghi]fluoranthene	1.28	226.09	XIC(226.09Â±500ppm)	4045883	780	1096	63.0048 min, 4.525 s	0.144	896
1-Hydroxypyrene	1.18	218.08	XIC(218.08Â±500ppm)	282763	140	159	63.1714 min, 4.740 s	0.136	825
1,19-Eicosadiene	0.65	55.08	XIC(55.08Â±500ppm)	2923284	254	365	63.4215 min, 1.761 s	0.069	829
11H-Benzo[a]fluoren-11-one	1.24	230.08	XIC(230.08Â±500ppm)	552114	126	330	63.5881 min, 4.519 s	0.133	766
N-Formyltryptamine	1	130.07	XIC(130.07Â±500ppm)	1041833	478	460	64.0048 min, 5.438 s	0.163	830
Benz[a]anthracene	1.44	228.1	XIC(228.10Â±500ppm)	6152726	684	1593	64.5882 min, 4.380 s	0.134	923
Benz[a]anthracene:2	1.52	228.1	XIC(228.10Â±500ppm)	8866640	1404	1433	64.8382 min, 4.505 s	0.145	936
11H-Benzo[a]carbazole	1.23	217.1	XIC(217.10Â±500ppm)	1400399	491	705	65.0049 min, 4.636 s	0.141	890
7H-Benz[de]anthracen-7-one	1.37	230.08	XIC(230.08Â±500ppm)	866231	305	404	65.6716 min, 4.906 s	0.146	855
Naphtho[2,1,8,7-klmn]xanthene	1.3	242.08	XIC(242.08Â±500ppm)	834905	448	507	66.1717 min, 4.462 s	0.142	806
Carbonic acid, bis(2-ethylhexyl) ester	0.37	70.09	XIC(70.09Â±500ppm)	327046	106	90	66.4217 min, 1.821 s	0.054	728
Benzene, (1-methylheptadecyl)-	1.06	105.07	XIC(105.07Â±500ppm)	313972	161	131	66.5884 min, 2.030 s	0.057	798
13-Docosenoic acid, methyl ester	0.22	55.07	XIC(55.07Â±500ppm)	859575	245	147	66.9217 min, 1.926 s	0.063	836
Docosanoic acid, methyl ester	1.06	74.04	XIC(74.04Â±500ppm)	2644828	1078	691	67.0884 min, 1.868 s	0.054	839
Eicosanal-	0.59	57.09	XIC(57.09Â±500ppm)	1311069	230	429	67.0884 min, 1.902 s	0.056	792
Chrysene, 1-methyl-	1.36	242.12	XIC(242.12Â±500ppm)	1030021	604	611	67.8385 min, 4.119 s	0.139	910
11-Tricosene	1.96	43.08	XIC(43.08Â±500ppm)	846671	167	103	68.0052 min, 1.702 s	0.197	801
Benz[a]anthracene, 7-methyl-	0.81	242.12	XIC(242.12Â±500ppm)	583277	141	320	68.0885 min, 4.227 s	0.123	847
Acenaphtho[1,2-b]quinoxaline, 9-methoxy-	1.07	284.12	XIC(284.12Â±500ppm)	605348	196	514	68.8386 min, 3.664 s	0.098	701
Benzene, nonadecyl-	1.09	92.06	XIC(92.06Â±500ppm)	750845	358	281	69.0886 min, 1.973 s	0.054	856
9-Hexadecenoic acid, methyl ester, (Z)-	0.19	55.07	XIC(55.07Â±500ppm)	376841	185	91	69.4219 min, 1.895 s	0.066	802
Tricosanoic acid, methyl ester	1.05	74.04	XIC(74.04Â±500ppm)	2673511	904	682	69.5886 min, 1.843 s	0.054	739
Oxirane, [(tetradecyloxy)methyl]-	0.98	57.09	XIC(57.09Â±500ppm)	1033894	376	314	69.5886 min, 1.859 s	0.074	737
3-(3,4-Dimethoxyphenyl)-7-hydroxychromen-2-one	1.13	298.14	XIC(298.14Â±500ppm)	2666373	1090	2047	70.5054 min, 3.541 s	0.106	767
3-Pentadecanone	0.97	57.08	XIC(57.08Â±500ppm)	279767	101	81	71.4221 min, 1.842 s	0.095	716
Tetracosanoic acid, methyl ester	1.08	74.04	XIC(74.04Â±500ppm)	7949757	2364	1566	71.9221 min, 1.824 s	0.053	897
Benzo[k]fluoranthene	1.38	252.1	XIC(252.10Â±500ppm)	2176887	682	1051	72.2555 min, 4.396 s	0.137	923
Perylene	0.82	252.1	XIC(252.10Â±500ppm)	3179621	526	823	72.3388 min, 4.488 s	0.177	924
Benzo(a)pyrene-4,5-dione	1.16	254.09	XIC(254.09Â±500ppm)	281750	135	195	74.1723 min, 5.019 s	0.137	739
Heneicosanoic acid, methyl ester	1.05	74.04	XIC(74.04Â±500ppm)	2409377	1453	793	74.2557 min, 1.802 s	0.052	836
Benzo[j]fluoranthene	1.27	252.11	XIC(252.11Â±500ppm)	2689854	979	863	74.2557 min, 4.681 s	0.143	925
7H-Benzimidazo[2,1-a]benz[de]isoquinolin-7-one	1.31	270.09	XIC(270.09Â±500ppm)	640021	467	388	74.4223 min, 4.539 s	0.124	749
Lupeol, trifluoroacetate	1.29	161.14	XIC(161.14Â±500ppm)	359700	203	298	75.3391 min, 2.341 s	0.071	717
2-Nonadecanone	0.99	43.06	XIC(43.06Â±500ppm)	1575059	630	170	76.1725 min, 1.812 s	0.052	848
Eicosanenitrile	0.46	57.08	XIC(57.08Â±500ppm)	2670742	543	661	76.3392 min, 1.918 s	0.055	826
trans-13-Octadecenoic acid	0.66	55.07	XIC(55.07Â±500ppm)	2650607	153	673	76.4225 min, 1.819 s	0.063	756
Hexacosanoic acid, methyl ester	1.06	74.04	XIC(74.04Â±500ppm)	17565148	4174	3187	76.5058 min, 1.785 s	0.054	878
Stigmasta-4,22-diene	1.43	55.07	XIC(55.07Â±500ppm)	395671	115	83	77.2559 min, 2.269 s	0.068	842
Ergost-5-en-3-ol, acetate, (3ÃŸ,24R)-	0.86	43.08	XIC(43.08Â±500ppm)	817098	143	96	77.7559 min, 2.422 s	0.073	818
n-Nonadecanol-1	1.18	83.09	XIC(83.09Â±500ppm)	3208674	682	855	77.8393 min, 1.629 s	0.06	723
Hexacosyl acetate	1.18	43.07	XIC(43.07Â±500ppm)	1569689	394	174	78.1726 min, 1.794 s	0.057	893
Germanicol	1.78	95.09	XIC(95.09Â±500ppm)	1008715	287	259	78.3393 min, 2.641 s	0.078	819
Cholesta-6,22,24-triene, 4,4-dimethyl-	0.45	55.08	XIC(55.08Â±500ppm)	1592906	293	238	78.506 min, 2.491 s	0.073	873
ÃŸ-SITOSTANYL ACETATE	1.37	43.08	XIC(43.08Â±500ppm)	622852	117	70	78.5893 min, 2.411 s	0.074	753
Heptacosanoic acid, methyl ester	1.03	74.04	XIC(74.04Â±500ppm)	862489	313	217	78.6727 min, 1.842 s	0.053	836
Cholesta-4,6-dien-3-ol, (3ÃŸ)-	0.97	43.08	XIC(43.08Â±500ppm)	344441	144	66	79.2561 min, 2.568 s	0.074	761
Tridecanedioic acid, dimethyl ester	0.99	74.05	XIC(74.05Â±500ppm)	276238	242	101	79.3394 min, 2.103 s	0.064	704
Cyclopentane, 1,2-dimethyl-3-(1-methylethyl)-	0.89	97.1	XIC(97.10Â±500ppm)	653843	105	309	79.5061 min, 1.758 s	0.052	744
ÃŸ-Sitosterol acetate	1.55	43.08	XIC(43.08Â±500ppm)	235685	115	34	79.5894 min, 2.554 s	0.077	788
Allyl undecanoate	1.27	43.07	XIC(43.07Â±500ppm)	1021947	333	117	79.6728 min, 1.890 s	0.056	772
2-Tetradecanone	0.47	43.06	XIC(43.06Â±500ppm)	417443	286	66	80.4228 min, 1.967 s	0.061	845
Indeno[1,2,3-cd]fluoranthene	1.24	63.97	XIC(276.11Â±500ppm)	345833	176	285	81.0062 min, 5.676 s	0.161	808
Eicosyl acetate	1.09	43.06	XIC(43.06Â±500ppm)	1051625	223	138	82.2563 min, 2.075 s	0.064	781
Carbonic acid, dimethyl ester	1.26	45.03	XIC(45.03Â±500ppm)	1625042	185	242	82.923 min, 5.979 s	0.054	705
Decanoic acid, 2-propenyl ester	0.2	43.07	XIC(43.07Â±500ppm)	346760	128	58	83.6731 min, 2.248 s	0.077	766
ÃŸ-Sitosterol	0.94	43.08	XIC(43.08Â±500ppm)	887983	165	104	84.2565 min, 3.596 s	0.107	865
Triacontanoic acid, methyl ester	1.13	74.04	XIC(74.04Â±500ppm)	600435	217	132	84.6732 min, 2.366 s	0.071	805
2- Bromopropionic acid, pentadecyl ester	1.22	43.06	XIC(43.06Â±500ppm)	672363	216	64	84.9232 min, 2.732 s	0.086	763
Lup-20(29)-en-3-one	1	81.08	XIC(81.08Â±500ppm)	552650	192	163	85.2565 min, 4.639 s	0.13	862
Lupeol	1	43.07	XIC(43.07Â±500ppm)	358969	142	45	85.6732 min, 4.761 s	0.122	885
Sulfurous acid, 2-pentyl tridecyl ester	1.63	57.09	XIC(57.09Â±500ppm)	898479	166	180	87.0067 min, 2.321 s	0.083	833
9,19-Cyclolanostan-3-ol, acetate, (3ÃŸ)-	1.05	43.07	XIC(43.07Â±500ppm)	499951	137	60	87.34 min, 4.936 s	0.142	766
p-Anisic acid, 4-nitrophenyl ester	1.54	135.07	XIC(135.07Â±500ppm)	32756236	416	2848	95.674 min, 6.169 s	0.07	737

## Sheet: Azadirachta indica (PTFE10)
Name	Tailing.Factor	Base.Mass	Quant.Masses	Area	Peak.S.N	Quant.S.N	R.T...min.	FWHH..s.	Similarity
2-Butenal	1.83	41.05	XIC(41.05Â±500ppm)	333943397	2522	5017	3.58334 min, 1.732 s	0.143	821
4-Methylheptane-3,5-dione	0.67	57.05	XIC(57.05Â±500ppm)	12672760	419	941	3.66668 min, 1.771 s	0.109	721
Cyanamide	5.95	42.02	XIC(42.02Â±500ppm)	278880230	667	1845	3.66668 min, 1.837 s	0.263	780
1H-Tetrazole-1,5-diamine	2.32	43.04	XIC(43.04Â±500ppm)	192323653	646	2113	4.16672 min, 1.705 s	0.119	781
Acetic acid, oxo-	0.13	44	XIC(44.00Â±500ppm)	4836712	105	148	4.16672 min, 6.258 s	0.089	733
1,3-Dioxolane, 2,4,5-trimethyl-	0.96	43.04	XIC(43.04Â±500ppm)	261067141	3825	3515	4.25006 min, 1.702 s	0.26	846
1-Propene, 1,3-dichloro-, (Z)-	0.27	75.01	XIC(75.01Â±500ppm)	8167163	641	1091	4.41674 min, 1.847 s	0.086	721
2-Pentanone, 3-methyl-	0.45	43.03	XIC(43.03Â±500ppm)	707683304	1176	6179	4.58342 min, 1.812 s	0.132	935
Propanoic acid, 2-methyl-, ethyl ester	0.66	43.03	XIC(43.03Â±500ppm)	1029426398	1817	7732	4.7501 min, 1.725 s	0.156	838
Pyrrole	1.17	67.05	XIC(67.05Â±500ppm)	6073009	987	966	4.7501 min, 2.104 s	0.1	744
N-Methylglycine	6.02	44.01	XIC(44.01Â±500ppm)	10246772	193	341	4.83344 min, 2.085 s	0.098	728
Acetic acid, methyl ester	1.1	43.11	XIC(43.11Â±500ppm)	168934330	1573	4893	4.91678 min, 2.303 s	0.111	788
2(5H)-Furanone	1.22	55.03	XIC(55.03Â±500ppm)	24315746	2578	1839	5.00012 min, 2.539 s	0.113	819
Cyclohexane, 1,3-dimethyl-	2.86	55.08	XIC(55.08Â±500ppm)	11673047	428	1471	5.08346 min, 1.582 s	0.118	768
Butanoic acid, 2-methyl-, methyl ester	0.55	57.08	XIC(57.08Â±500ppm)	52337111	1016	4559	5.08346 min, 1.788 s	0.136	803
Methacrylic acid, ethyl ester	0.57	41.06	XIC(41.06Â±500ppm)	66334078	2156	1931	5.25014 min, 1.857 s	0.117	789
3-Hexanone	0.21	43.07	XIC(43.07Â±500ppm)	156268907	4170	2830	5.25014 min, 1.909 s	0.113	950
di-tert-Butyl dicarbonate	1.37	57.08	XIC(57.08Â±500ppm)	27164663	377	4217	5.33348 min, 1.715 s	0.115	754
Pentanoic acid	1.21	60.03	XIC(60.03Â±500ppm)	47035736	1994	1487	5.33348 min, 1.773 s	0.091	847
Sulfurous acid, butyl isobutyl ester	5.98	57.05	XIC(57.05Â±500ppm)	9845594	902	1567	5.41682 min, 1.561 s	0.077	749
3-Butenoic acid, ethyl ester	0.28	41.06	XIC(41.06Â±500ppm)	17211386	741	670	5.41682 min, 1.926 s	0.109	755
Furan, 2-methoxy-	0.21	55.07	XIC(55.07Â±500ppm)	14158555	1446	1424	5.50016 min, 2.079 s	0.116	821
Carbonocyanidic acid, ethyl ester	1.24	84.02	XIC(84.02Â±500ppm)	26858019	576	4118	5.50016 min, 2.759 s	0.131	758
3-Furaldehyde	1.14	95.01	XIC(95.01Â±500ppm)	8785363	1851	3193	5.91686 min, 2.598 s	0.121	898
2-Butenoic acid, ethyl ester, (E)-	1.3	69.04	XIC(69.04Â±500ppm)	98947150	4006	7629	6.0002 min, 2.037 s	0.104	702
(R)-(-)-2-Amino-1-propanol	8	44.01	XIC(44.01Â±500ppm)	13354286	147	321	6.16688 min, 1.863 s	0.278	738
3-Pentanone	0.92	57.08	XIC(57.08Â±500ppm)	23147061	640	2411	6.16688 min, 1.940 s	0.162	790
2-Butanone, 1-(acetyloxy)-	0.23	43.04	XIC(43.04Â±500ppm)	31922993	1129	876	6.16688 min, 2.351 s	0.119	788
3-Hexanone, 2,4-dimethyl-	3.17	57.06	XIC(57.06Â±500ppm)	5851343	305	619	6.25022 min, 1.520 s	0.059	723
Octane, 2-methyl-	2.18	43.08	XIC(43.08Â±500ppm)	12342484	170	656	6.25022 min, 1.572 s	0.118	787
2-Butenoic acid, (E)-	0.22	41.05	XIC(41.05Â±500ppm)	63863284	2123	1366	6.33356 min, 2.052 s	0.105	857
4-Decene, 4-methyl-, (E)-	4.07	55.07	XIC(55.07Â±500ppm)	5224066	534	708	6.66692 min, 1.656 s	0.145	718
3-Hexanone, 4-methyl-	1.19	57.07	XIC(57.07Â±500ppm)	28326381	2498	4171	6.66692 min, 2.026 s	0.138	875
N-Methyl-N'-nitroguanidine	0.44	43.04	XIC(43.04Â±500ppm)	49263271	657	775	6.75026 min, 2.785 s	0.153	745
3-Nonene, (E)-	3.39	55.07	XIC(55.07Â±500ppm)	9216923	429	747	6.8336 min, 1.677 s	0.139	776
Hexane, 3-ethyl-	1.84	43.07	XIC(43.07Â±500ppm)	12010825	749	467	7.08362 min, 1.621 s	0.122	809
Propanedioic acid, amino-, diethyl ester	2.49	102.07	XIC(102.07Â±500ppm)	68653146	2334	5530	7.08362 min, 1.908 s	0.171	749
2-Hexanone, 3-methyl-	0.93	43.04	XIC(43.04Â±500ppm)	24907308	483	470	7.16696 min, 3.196 s	0.143	729
Maleic anhydride	1.11	54.03	XIC(54.03Â±500ppm)	32529816	1913	2864	7.16696 min, 3.613 s	0.139	954
Hydroxylamine, O-(phenylmethyl)-	1.36	91.12	XIC(91.12Â±500ppm)	573011513	1774	46929	7.2503 min, 2.223 s	0.155	854
Methanesulfonic acid, methyl ester	1.11	80	XIC(80.00Â±500ppm)	3180945	434	1174	7.41698 min, 3.534 s	0.162	747
1-Hexene, 3,3-dimethyl-	2.66	55.07	XIC(55.07Â±500ppm)	4166096	439	419	7.667 min, 1.767 s	0.246	713
1-Methoxy-2-propyl acetate	2.32	43.03	XIC(43.03Â±500ppm)	25584889	985	842	7.667 min, 2.291 s	0.145	877
Cyclohexane, 1,2,3-trimethyl-	4.71	55.07	XIC(55.07Â±500ppm)	3543289	340	438	7.83368 min, 1.736 s	0.146	776
7-Oxabicyclo[4.1.0]heptane, 2-methyl-	0.23	55.07	XIC(55.07Â±500ppm)	1947469	299	223	8.00036 min, 2.338 s	0.147	730
4-Cyclopentene-1,3-dione	1.14	96.02	XIC(96.02Â±500ppm)	18139078	2995	3667	8.0837 min, 3.373 s	0.143	894
3-Heptanone	0.16	57.07	XIC(57.07Â±500ppm)	2692976	391	523	8.16704 min, 2.206 s	0.109	843
4-Undecene, 6-methyl-	2.89	55.07	XIC(55.07Â±500ppm)	8579822	496	686	8.33372 min, 1.777 s	0.14	721
CH3C(O)OCH(CH3)C(O)CH3	1.25	43.04	XIC(43.04Â±500ppm)	50320496	1455	927	8.41706 min, 2.663 s	0.188	889
Furan, 2,5-diethyltetrahydro-	0.48	81.07	XIC(81.07Â±500ppm)	1997219	254	546	8.5004 min, 2.034 s	0.124	763
Cyclopentene, 1,2,3,3,4-pentamethyl-	1.2	123.08	XIC(123.08Â±500ppm)	7647777	2010	4416	8.58374 min, 2.003 s	0.145	723
2(3H)-Furanone, dihydro-5-propyl-	1.45	85.07	XIC(85.07Â±500ppm)	8156059	1196	2283	8.58374 min, 2.050 s	0.128	752
Pentanoic acid, ethyl ester	1.38	88.05	XIC(88.05Â±500ppm)	134145858	3754	8675	8.66708 min, 2.142 s	0.141	944
Cyclohexane, 1-bromo-2-methyl-	1.79	55.07	XIC(55.07Â±500ppm)	12898750	721	909	8.83376 min, 1.872 s	0.144	790
Bicyclo[2.2.1]heptane, 2-ethyl-	1.2	95.08	XIC(95.08Â±500ppm)	26733431	3167	4236	9.25046 min, 2.006 s	0.139	893
p-Benzoquinone	1.07	54.03	XIC(54.03Â±500ppm)	23887230	1537	2661	9.25046 min, 3.841 s	0.15	933
Butanoic acid, 2,3-dimethyl-, ethyl ester	2.3	43.07	XIC(43.07Â±500ppm)	963049	213	53	9.41714 min, 2.092 s	0.138	720
Dimethyl sulfone	1.23	78.99	XIC(78.99Â±500ppm)	56836971	2589	5186	9.41714 min, 4.972 s	0.222	945
Heptane, 2,3,6-trimethyl-	1.25	43.06	XIC(43.06Â±500ppm)	3638809	370	237	9.50048 min, 1.677 s	0.115	821
o-Xylene	4.19	91.06	XIC(91.06Â±500ppm)	1119894	155	193	9.50048 min, 1.991 s	0.103	733
Octane, 2,7-dimethyl-	1.23	43.06	XIC(43.06Â±500ppm)	3085232	196	204	9.66716 min, 1.670 s	0.097	741
Cyclohexane, propyl-	1.02	83.09	XIC(83.09Â±500ppm)	9387077	986	2904	9.66716 min, 1.918 s	0.117	909
Octane, 3,6-dimethyl-	2.57	57.09	XIC(57.09Â±500ppm)	10997484	570	1540	9.83384 min, 1.689 s	0.106	885
Cyclopentane, butyl-	0.56	69.08	XIC(69.08Â±500ppm)	5687605	329	1036	9.83384 min, 1.883 s	0.094	872
Bicyclo[3.1.0]hex-2-ene, 2-methyl-5-(1-methylethyl)-	1.23	93.07	XIC(93.07Â±500ppm)	5082021	768	1431	9.83384 min, 1.990 s	0.166	805
2-Ethyl-n-butyric acid ethyl ester	0.57	71.09	XIC(71.09Â±500ppm)	1653485	438	539	9.83384 min, 2.117 s	0.155	834
Acetamide, N-(cyanomethyl)-	1.26	43.04	XIC(43.04Â±500ppm)	1272787	105	56	10.0005 min, 1.770 s	0.078	705
Methanesulfonic acid, ethyl ester	1.08	78.99	XIC(78.99Â±500ppm)	7077612	2072	1351	10.0005 min, 3.801 s	0.184	808
Pentanoic acid, 2-methyl-, ethyl ester	1.18	43.07	XIC(43.07Â±500ppm)	4054451	542	176	10.1672 min, 2.125 s	0.13	862
Butanoic acid, 2-ethyl-, 1,2,3-propanetriyl ester	1.18	73.04	XIC(73.04Â±500ppm)	1859733	207	210	10.2505 min, 2.090 s	0.133	760
2,5-Furandione, 3-methyl-	1.08	68.04	XIC(68.04Â±500ppm)	67429781	2463	6039	10.3339 min, 3.973 s	0.148	812
Benzene, isocyanato-	1.13	119.04	XIC(119.04Â±500ppm)	3458222	1419	1250	10.8339 min, 2.715 s	0.111	903
Acetohydroxamic acid	1.31	43.04	XIC(43.04Â±500ppm)	24548802	1590	1097	11.0006 min, 2.668 s	0.156	731
Cyclohexene,3-(1-methylpropyl)-	1.15	81.07	XIC(81.07Â±500ppm)	3912805	376	859	11.2506 min, 2.046 s	0.159	809
4-Octanone	1.07	71.06	XIC(71.06Â±500ppm)	1458223	143	420	11.5006 min, 2.337 s	0.108	806
2-Methylbicyclo[3.2.1]octane	1.1	95.09	XIC(95.09Â±500ppm)	5215218	716	962	11.7507 min, 2.075 s	0.165	771
2-Octene, 4-ethyl-	1	55.07	XIC(55.07Â±500ppm)	17871216	325	1038	11.9173 min, 1.886 s	0.143	802
1H-Indene, octahydro-, cis-	0.33	81.07	XIC(81.07Â±500ppm)	9752829	442	2087	12.0007 min, 2.298 s	0.134	866
Benzonitrile	1.16	103.04	XIC(103.04Â±500ppm)	2271615	629	579	12.0007 min, 3.660 s	0.147	837
Cyclohexane, 1-methyl-3-(1-methylethylidene)-	1.21	95.09	XIC(95.09Â±500ppm)	44585666	2711	5352	12.1674 min, 2.118 s	0.139	811
Butanimidamide	0.14	44.01	XIC(44.01Â±500ppm)	2628597	176	85	12.334 min, 2.429 s	0.114	704
2H-Pyran-2,6(3H)-dione	1.13	55.04	XIC(55.04Â±500ppm)	6204320	694	474	12.334 min, 3.782 s	0.149	861
Heptane, 3-ethyl-5-methyl-	1.25	57.09	XIC(57.09Â±500ppm)	11520588	2005	1939	12.4174 min, 1.769 s	0.16	842
cis-4-Decene	1.32	55.07	XIC(55.07Â±500ppm)	32147785	577	1756	12.4174 min, 1.855 s	0.092	849
trans-3-Decene	1.48	55.07	XIC(55.07Â±500ppm)	7450555	274	724	12.5841 min, 1.856 s	0.089	844
1,2-Ethanediol, diacetate	1.17	43.04	XIC(43.04Â±500ppm)	16343471	1360	623	12.5841 min, 3.119 s	0.15	930
endo-2-Methylbicyclo[3.3.1]nonane	1.3	67.07	XIC(67.07Â±500ppm)	1155310	151	269	12.8341 min, 2.143 s	0.185	743
Ethanol, 2-(2-ethoxyethoxy)-	1.16	45.05	XIC(45.05Â±500ppm)	86446124	2310	2206	12.8341 min, 2.980 s	0.128	943
Octane, 2,3,6-trimethyl-	1.9	57.09	XIC(57.09Â±500ppm)	8834845	1044	1746	12.9174 min, 1.753 s	0.129	855
Benzene, (2-methylpropyl)-	1.13	91.05	XIC(91.05Â±500ppm)	38984536	1975	4596	12.9174 min, 2.435 s	0.132	935
Cyclohexane, 1-methyl-4-(1-methylethenyl)-, cis-	0.36	81.07	XIC(81.07Â±500ppm)	1555722	257	360	13.0841 min, 2.171 s	0.179	729
Benzene, (1-methylpropyl)-	1.11	105.07	XIC(105.07Â±500ppm)	17108854	1702	4376	13.0841 min, 2.476 s	0.136	934
p-Benzoquinone, 2-methyl-	1.08	54.03	XIC(54.03Â±500ppm)	3535149	351	475	13.1674 min, 3.966 s	0.147	748
2,3-Epoxybutane	1.24	43.05	XIC(43.05Â±500ppm)	76241373	4267	1790	13.1674 min, 4.349 s	0.191	845
8-Dodecen-1-ol, (Z)-	1.15	67.07	XIC(67.07Â±500ppm)	10650116	946	1282	13.4175 min, 2.147 s	0.125	848
3-Pyridinol	1.09	95.04	XIC(95.04Â±500ppm)	1894333	336	569	13.5841 min, 3.851 s	0.142	762
Pentane, 2,2,4-trimethyl-	1.31	57.09	XIC(57.09Â±500ppm)	82968685	5585	11246	13.6675 min, 1.716 s	0.124	813
Butanoic acid, 2-methyl-5-oxo-1-cyclopenten-1-yl ester	1.04	43.07	XIC(43.07Â±500ppm)	51775510	1772	1903	13.6675 min, 1.740 s	0.117	742
Indane	0.69	117.07	XIC(117.07Â±500ppm)	744321	246	313	13.7508 min, 2.876 s	0.123	826
Ethanone, 1-(2-hydroxyphenyl)-	1.11	121.03	XIC(121.03Â±500ppm)	1464384	488	677	14.0008 min, 3.174 s	0.141	719
Benzene, 2-propenyl-	1.11	117.07	XIC(117.07Â±500ppm)	472793934	21333	46470	14.1675 min, 3.021 s	0.172	932
1-Heptadecyne	0.26	81.07	XIC(81.07Â±500ppm)	4545559	257	715	14.2509 min, 2.260 s	0.126	801
2-Chloro-3-pyridinol	1.2	93.02	XIC(93.02Â±500ppm)	1829299	387	635	14.3342 min, 3.707 s	0.141	921
1-Octene, 3,4-dimethyl-	1.04	43.07	XIC(43.07Â±500ppm)	13114059	921	785	14.5009 min, 1.790 s	0.119	757
3-Methylphenylacetylene	1.09	116.06	XIC(116.06Â±500ppm)	1527157	343	440	14.5009 min, 3.285 s	0.136	906
Cyclohexane, 1-methyl-4-(1-methylethenyl)-, trans-	0.23	95.09	XIC(95.09Â±500ppm)	1127660	200	446	14.5842 min, 2.282 s	0.122	826
Benzeneacetaldehyde	1.11	91.06	XIC(91.06Â±500ppm)	46804906	2563	3244	14.5842 min, 3.741 s	0.147	932
Decane, 5,6-dimethyl-	1.3	43.07	XIC(43.07Â±500ppm)	67124265	8344	2341	14.6676 min, 1.745 s	0.118	907
4,7-Methanoindene, 3a,4,5,6,7,7a-hexahydro-, endo-	1.16	66.06	XIC(66.06Â±500ppm)	4464956	796	711	14.6676 min, 2.569 s	0.143	888
Cyclohexanone, 5-methyl-2-(1-methylethylidene)-	0.64	81.07	XIC(81.07Â±500ppm)	4868905	459	794	14.7509 min, 2.081 s	0.156	762
Benzene, 1-methyl-3-propyl-	1.13	105.07	XIC(105.07Â±500ppm)	98860116	6410	13059	14.9176 min, 2.542 s	0.124	921
Heptane, 5-ethyl-2,2,3-trimethyl-	1.19	57.09	XIC(57.09Â±500ppm)	798548831	10244	44936	15.0843 min, 1.802 s	0.182	868
Benzeneacetaldehyde, a-methyl-	1.2	105.07	XIC(105.07Â±500ppm)	40966324	5335	7542	15.0843 min, 2.557 s	0.126	857
1H-Cyclopentano[c]coumarine, 2,3-dihydro-7-benzyloxy-	0.9	91.06	XIC(91.06Â±500ppm)	24024579	415	3003	15.0843 min, 2.583 s	0.135	710
1,2-Benzenediol, o-(3-cyclopentylpropionyl)-o'-(2-methylbenzoyl)-	0.98	119.09	XIC(119.09Â±500ppm)	6438381	1136	2336	15.0843 min, 2.612 s	0.121	855
Benzene, n-butyl-	1.11	91.05	XIC(91.05Â±500ppm)	31819860	3277	3831	15.1676 min, 2.553 s	0.12	912
4,7-Methano-1H-indene, octahydro-	1.18	95.08	XIC(95.08Â±500ppm)	65522172	2716	9454	15.2509 min, 2.497 s	0.152	925
Benzene, 2-ethyl-1,4-dimethyl-	1.04	119.08	XIC(119.08Â±500ppm)	41217599	1409	7766	15.2509 min, 2.587 s	0.126	820
Thiophene, 2-butyl-	1.02	97.01	XIC(97.01Â±500ppm)	1750294	439	845	15.2509 min, 2.718 s	0.117	732
Phenol, 2-methyl-	1.21	108.06	XIC(108.06Â±500ppm)	816844	295	313	15.2509 min, 3.178 s	0.133	804
N-(Benzyloxy)-2,2,2-trifluoroacetamide	1.41	91.06	XIC(91.06Â±500ppm)	4030865	350	605	15.3343 min, 2.526 s	0.151	754
2-Propynenitrile, 3-fluoro-	2.96	69.08	XIC(69.08Â±500ppm)	21921552	1391	3235	15.4176 min, 1.800 s	0.141	770
cis-Decalin, 2-syn-methyl-	0.89	81.07	XIC(81.07Â±500ppm)	4287750	290	894	15.4176 min, 2.125 s	0.13	761
Benzenemethanol, a-methyl-, (S)-	1.01	79.06	XIC(79.06Â±500ppm)	608200	146	91	15.4176 min, 3.403 s	0.138	719
Oxirane, phenyl-	1.15	91.06	XIC(91.06Â±500ppm)	4052360	483	534	15.501 min, 3.631 s	0.142	827
S-Methyl methanethiosulphonate	1.2	47.01	XIC(47.01Â±500ppm)	6497343	2496	1019	15.501 min, 5.268 s	0.205	916
5-Oxotetrahydrofuran-2-carboxylic acid	1.1	85.03	XIC(85.03Â±500ppm)	6426506	1549	2203	15.501 min, 5.708 s	0.195	873
Aniline, N-methyl-	1.2	106.07	XIC(106.07Â±500ppm)	23725715	1451	3473	15.5843 min, 3.767 s	0.142	831
Benzaldehyde, 2-methyl-	1.2	91.06	XIC(91.06Â±500ppm)	2592391	464	363	15.6676 min, 3.603 s	0.139	915
5-Hepten-3-yn-2-ol, 6-methyl-5-(1-methylethyl)-	1.19	151.16	XIC(151.16Â±500ppm)	9604465	1096	6392	16.0843 min, 2.059 s	0.156	706
2,5-Furandicarboxaldehyde	1.11	124.02	XIC(124.02Â±500ppm)	2439371	1069	1278	16.1677 min, 4.768 s	0.163	904
1-Phenyl-1-butene	1.07	117.08	XIC(117.08Â±500ppm)	18780740	1923	5111	16.251 min, 2.878 s	0.128	900
Succinic anhydride	3.14	56.08	XIC(56.08Â±500ppm)	13553832	240	1847	16.3344 min, 1.755 s	0.111	747
Sulfurous acid, hexyl pentyl ester	1.26	43.07	XIC(43.07Â±500ppm)	17523255	2089	1430	16.4177 min, 1.835 s	0.153	772
Cycloheptanemethanol	0.6	55.08	XIC(55.08Â±500ppm)	5586029	849	882	16.4177 min, 1.989 s	0.111	716
Pentane, 2,2,4,4-tetramethyl-	1.41	57.09	XIC(57.09Â±500ppm)	60435313	19344	13008	16.5844 min, 1.792 s	0.129	838
cis-3-Methyl-endo-tricyclo[5.2.1.0(2.6)]decane	1.8	81.09	XIC(81.09Â±500ppm)	18767362	2585	4807	16.8344 min, 2.411 s	0.147	845
Cyclohexane, 1-methyl-3-propyl-	2.19	55.08	XIC(55.08Â±500ppm)	1519629	221	402	16.9177 min, 2.060 s	0.115	785
2-Butoxyethyl acetate	1.2	43.05	XIC(43.05Â±500ppm)	25972263	2158	2038	16.9177 min, 2.699 s	0.11	917
Naphthalene, decahydro-, cis-	0.26	67.08	XIC(67.08Â±500ppm)	801403	279	267	17.0011 min, 2.532 s	0.125	832
2,5-Furandione, 3-(1,1-dimethylethyl)-	1.08	67.09	XIC(67.09Â±500ppm)	508007	299	155	17.1678 min, 3.338 s	0.149	857
Benzene, 1-methyl-4-butyl	1.08	105.1	XIC(105.10Â±500ppm)	908823	305	462	17.2511 min, 2.518 s	0.137	840
Benzene, 1-methyl-4-(1-methylpropyl)-	1.12	119.12	XIC(119.12Â±500ppm)	304283	185	327	17.3344 min, 2.536 s	0.127	719
Benzene, 4-ethyl-1,2-dimethyl-	1.06	119.13	XIC(119.13Â±500ppm)	1617174	498	1404	17.4178 min, 2.834 s	0.131	892
4-Pyridinone	1.15	95.07	XIC(95.07Â±500ppm)	5139414	1175	1366	17.4178 min, 3.560 s	0.127	864
trans-Decalin, 2-methyl-	1.22	81.1	XIC(81.10Â±500ppm)	6281060	1119	2162	17.5011 min, 2.320 s	0.12	866
Tricyclo[5.2.1.0(2,6)]decane, 4-methyl-	1.09	81.1	XIC(81.10Â±500ppm)	27369004	4411	6620	17.6678 min, 2.485 s	0.147	855
Levoglucosenone	1.04	68.05	XIC(68.05Â±500ppm)	2368782	681	641	17.7511 min, 4.765 s	0.177	845
Benzene, 1,2,3,4-tetramethyl-	1.13	119.12	XIC(119.12Â±500ppm)	2085737	784	1202	17.8345 min, 2.768 s	0.125	892
Cyclohexane, 2,4-diethyl-1-methyl-	0.65	69.09	XIC(69.09Â±500ppm)	9014899	323	1749	17.9178 min, 2.005 s	0.139	742
2H-Inden-2-one, octahydro-3a-methyl-, trans-	0.26	95.11	XIC(95.11Â±500ppm)	822818	124	356	18.0012 min, 2.359 s	0.128	745
3-Hydroxypyridine monoacetate	1.25	43.04	XIC(43.04Â±500ppm)	15517108	1806	1031	18.0012 min, 3.807 s	0.145	877
Benzene, 1-ethyl-2,3-dimethyl-	1.1	119.11	XIC(119.11Â±500ppm)	5351201	1082	2560	18.0845 min, 2.803 s	0.128	915
Benzene, (3-methylbutyl)-	1.02	92.08	XIC(92.08Â±500ppm)	1062589	374	412	18.1678 min, 2.539 s	0.116	849
1-Methyldecahydronaphthalene	2.2	67.07	XIC(67.07Â±500ppm)	12861749	3845	2403	18.2512 min, 2.383 s	0.14	872
2,4-Cycloheptadien-1-one, 2,6,6-trimethyl-	1.24	107.1	XIC(107.10Â±500ppm)	2350913	414	922	18.2512 min, 2.878 s	0.143	861
Methane, isocyanato-	1.46	57.09	XIC(57.09Â±500ppm)	97477268	4377	12861	18.3345 min, 1.767 s	0.122	824
Pentane, 3,3-dimethyl-	1.27	43.07	XIC(43.07Â±500ppm)	33139496	1613	2811	18.3345 min, 1.794 s	0.104	781
Cis-8-methyl-exo-tricyclo[5.2.1.0(2.6)]decane	0.25	79.07	XIC(79.07Â±500ppm)	2355665	433	429	18.3345 min, 2.469 s	0.208	724
2(1H)-Pyridinone, 5-methyl-	1.15	80.06	XIC(80.06Â±500ppm)	805936	343	314	18.3345 min, 3.542 s	0.127	845
1-Octanethiol	1.32	41.06	XIC(41.06Â±500ppm)	722203	170	63	18.4179 min, 2.408 s	0.107	830
2-Hexanone, 6-bromo-	1.68	43.07	XIC(43.07Â±500ppm)	14081971	444	1186	18.6679 min, 1.845 s	0.2	756
7-Methyl-1,2,3,5,8,8a-hexahydronaphthalene	1.02	106.08	XIC(106.08Â±500ppm)	3259350	600	1434	18.6679 min, 2.568 s	0.135	726
Cyclohexane, pentyl-	0.68	83.09	XIC(83.09Â±500ppm)	20504197	1070	6577	18.7512 min, 2.089 s	0.1	844
Cis-4-methyl-exo-tricyclo[5.2.1.0(2.6)]decane	1.13	67.06	XIC(67.06Â±500ppm)	59453396	2289	6463	18.8346 min, 2.475 s	0.142	913
Formic acid, 2-methylpropyl ester	0.47	41.06	XIC(41.06Â±500ppm)	990226	167	70	18.8346 min, 3.029 s	0.115	751
1H-Indene, 2,3-dihydro-4-methyl-	1.07	117.07	XIC(117.07Â±500ppm)	45769356	2806	7247	18.9179 min, 3.065 s	0.122	920
Tricyclo[5.2.1.0(2,6)]dec-4-ene, 4-methyl-	0.92	81.07	XIC(81.07Â±500ppm)	89759682	2327	8369	19.0012 min, 2.624 s	0.146	868
trans,cis-1,8-Dimethylspiro[4.5]decane	1.3	95.08	XIC(95.08Â±500ppm)	19759293	376	2808	19.0846 min, 2.179 s	0.124	756
Cyclohexane, 1-methyl-2-pentyl-	2.31	55.07	XIC(55.07Â±500ppm)	50816352	900	4353	19.3346 min, 2.011 s	0.113	780
1H-Indene, 1-ethylideneoctahydro-7a-methyl-, cis-	0.83	81.07	XIC(81.07Â±500ppm)	33374367	758	6190	19.4179 min, 2.321 s	0.137	759
1-Butanamine, N-(1-methylethyl)-	5.86	44.02	XIC(44.02Â±500ppm)	1052231	624	23	19.4179 min, 3.312 s	0.143	747
cis,cis-1,6-Dimethylspiro[4.5]decane	1.59	109.1	XIC(109.10Â±500ppm)	10521358	375	2768	19.5013 min, 2.203 s	0.121	716
Benzene, 1,2,4,5-tetramethyl-	1.14	119.09	XIC(119.09Â±500ppm)	13892497	2057	2211	19.5013 min, 2.961 s	0.122	884
Phenol, 2,4-dimethyl-	1.56	107.05	XIC(107.05Â±500ppm)	1082036	419	226	19.5013 min, 3.272 s	0.122	774
1-Butene, 3,3-dimethyl-	1.12	69.01	XIC(69.01Â±500ppm)	4847593	1337	868	19.5013 min, 5.118 s	0.171	745
Decalin, syn-1-methyl-, cis-	0.25	67.06	XIC(67.06Â±500ppm)	25676216	1306	3239	19.7513 min, 2.496 s	0.133	863
Cyclohexane, 1,4-dimethyl-2-(2-methylpropyl)-, (1a,2ÃŸ,4a)-	0.71	69.08	XIC(69.08Â±500ppm)	111656023	1047	8959	19.8346 min, 2.039 s	0.117	807
Naphthalene, 1,2,3,4-tetrahydro-	1.08	104.06	XIC(104.06Â±500ppm)	93752663	5082	10344	19.918 min, 3.325 s	0.138	924
2(3H)-Furanone, dihydro-4-hydroxy-	0.62	44.05	XIC(44.05Â±500ppm)	19679549	260	493	19.918 min, 5.597 s	0.168	789
Methyl-a-d-ribofuranoside	1.06	57.05	XIC(57.05Â±500ppm)	67619148	5902	3978	20.0013 min, 5.086 s	0.194	752
Piperidine, 2-propyl-, (S)-	4.74	84.1	XIC(84.10Â±500ppm)	5177694	468	1722	20.0847 min, 1.848 s	0.177	753
6-Methyl-2-(piperidin-1-ylmethyl)-4-pyrimidinylamine	1.33	123.12	XIC(123.12Â±500ppm)	5055875	114	1593	20.0847 min, 2.234 s	0.125	724
Naphthalene, decahydro-2,6-dimethyl-	2.08	81.07	XIC(81.07Â±500ppm)	80353707	2561	5862	20.0847 min, 2.275 s	0.124	829
Decalin, anti-1-methyl-, cis-	0.26	81.07	XIC(81.07Â±500ppm)	41238579	1288	4407	20.0847 min, 2.527 s	0.157	920
2,4-Dinitrophennylhydrazone of ribose tetrabenzoate	1.17	105.04	XIC(105.04Â±500ppm)	7426581	1101	1094	20.168 min, 3.236 s	0.116	896
Heptane, 3,3-dimethyl-	1.39	57.09	XIC(57.09Â±500ppm)	355329795	2650	21778	20.2513 min, 1.776 s	0.177	729
2,6-Difluorobenzoic acid, 4-nitrophenyl ester	0.61	141.17	XIC(141.17Â±500ppm)	5060006	856	1621	20.2513 min, 1.869 s	0.24	869
Benzene, 1,4-diethyl-2-methyl-	1.03	133.11	XIC(133.11Â±500ppm)	2248756	409	731	20.3347 min, 2.746 s	0.125	805
Propargyl alcohol	5.42	55.08	XIC(55.08Â±500ppm)	20000667	273	2034	20.418 min, 1.815 s	0.256	778
5-Methyl-2-(2-methyl-2-tetrahydrofuryl)tetrahydrofuran	1.43	43.07	XIC(43.07Â±500ppm)	48250596	430	3309	20.418 min, 1.866 s	0.112	827
Cyclooctene, 3-(1-methylethenyl)-	0.23	81.07	XIC(81.07Â±500ppm)	28282853	1694	2935	20.5014 min, 2.645 s	0.233	850
Cyclobutylcarboxamide, N-methallyl-	0.97	71.09	XIC(71.09Â±500ppm)	37004816	732	6858	20.668 min, 1.849 s	0.212	719
2,4-Nonanedione	1.08	85.03	XIC(85.03Â±500ppm)	5912051	764	996	20.668 min, 2.629 s	0.094	820
Cycloundecene, 1-methyl-	1.54	81.07	XIC(81.07Â±500ppm)	157559970	1586	11107	20.7514 min, 2.314 s	0.133	836
3-Pyridinol, 2,6-dimethyl-	1.59	43.04	XIC(43.04Â±500ppm)	1803905	274	82	20.8347 min, 3.468 s	0.129	701
1H-Indene, 2,3-dihydro-4,7-dimethyl-	0.99	131.09	XIC(131.09Â±500ppm)	3365397	741	784	20.9181 min, 2.911 s	0.115	884
1,3-Diisopropyl cyclohexane	0.99	69.08	XIC(69.08Â±500ppm)	46144846	1127	4761	21.0014 min, 2.060 s	0.173	702
2-Thiophenecarboxylic acid, 4-nitrophenyl ester	0.85	111.12	XIC(111.12Â±500ppm)	31070334	558	6892	21.0847 min, 2.085 s	0.136	749
Cyclopentylcyclohexane	0.21	82.08	XIC(82.08Â±500ppm)	22617628	1155	3820	21.1681 min, 2.473 s	0.117	829
1H-Indene, 2,3-dihydro-1,3-dimethyl-	1.08	131.09	XIC(131.09Â±500ppm)	13895199	1619	2651	21.1681 min, 2.942 s	0.122	900
Ethanol, 1,1'-oxybis-, diacetate	1.21	43.04	XIC(43.04Â±500ppm)	10141799	700	373	21.1681 min, 3.088 s	0.125	787
1,2-Naphthalenedione	1.28	102.05	XIC(102.05Â±500ppm)	775420	208	265	21.1681 min, 4.265 s	0.14	763
D-Fucose	1.05	71.06	XIC(71.06Â±500ppm)	4430751	326	756	21.1681 min, 4.475 s	0.147	764
(S)-(+)-2',3'-Dideoxyribonolactone	1.11	85.03	XIC(85.03Â±500ppm)	19689614	970	3505	21.1681 min, 5.653 s	0.168	947
1H-Indene, 1-ethyl-2,3-dihydro-	1.09	117.07	XIC(117.07Â±500ppm)	6924728	809	1104	21.4181 min, 2.986 s	0.123	846
1H-Indene, 2,3-dihydro-1-methyl-3-octyl-	0.94	131.09	XIC(131.09Â±500ppm)	2480466	330	678	21.4181 min, 3.034 s	0.145	745
Benzenamine, 2-chloro-N-methyl-	1.15	140.03	XIC(140.03Â±500ppm)	2587856	453	1305	21.4181 min, 3.771 s	0.135	876
1H-Indene, 2,3-dihydro-1,6-dimethyl-	1.04	131.09	XIC(131.09Â±500ppm)	3851792	476	1143	21.5848 min, 3.026 s	0.123	809
1-Cyclohexene-1-carboxaldehyde, 4-(1-methylethenyl)-, (S)-	1.08	133.11	XIC(133.11Â±500ppm)	8359300	1241	2486	21.6681 min, 2.777 s	0.119	747
2,2'-Bipyrrolidine	1.17	70.09	XIC(70.09Â±500ppm)	6561463	123	1206	21.7515 min, 2.044 s	0.06	820
Benzene, 1-ethyl-2,4,5-trimethyl-	0.91	133.11	XIC(133.11Â±500ppm)	6692107	765	1668	21.7515 min, 2.805 s	0.128	874
3-Formyl-4,5-dimethyl-pyrrole	1.24	122.07	XIC(122.07Â±500ppm)	1165861	310	327	21.7515 min, 3.508 s	0.127	763
Cyclohexane, 1-methyl-3-pentyl-	1.72	55.07	XIC(55.07Â±500ppm)	37277489	1166	4249	21.8348 min, 2.093 s	0.104	805
Cyclohexene,1-propyl-	0.91	81.07	XIC(81.07Â±500ppm)	52709244	1053	7365	21.8348 min, 2.360 s	0.342	738
Phosphoric acid, dimethyl 1-propenyl ester	0.72	109.1	XIC(109.10Â±500ppm)	18745145	212	4261	21.8348 min, 2.392 s	0.109	755
Pyridine, 3-phenyl-	2.87	155.18	XIC(155.18Â±500ppm)	2297585	691	1257	21.9181 min, 1.793 s	0.073	736
3-Furancarboxylic acid, tetrahydro-3-hydroxy-2-(4-methoxyphenyl)-5-oxo-, methyl ester	0.54	137.14	XIC(137.14Â±500ppm)	8101394	350	3228	21.9181 min, 2.344 s	0.146	736
1H-Indene, 1-ethyloctahydro-7a-methyl-, (1a,3aÃŸ,7aa)-	0.38	95.08	XIC(95.08Â±500ppm)	72160315	919	8610	21.9181 min, 2.408 s	0.157	858
Pyrolo[3,2-d]pyrimidin-2,4(1H,3H)-dione	0.99	151.15	XIC(151.15Â±500ppm)	22061891	897	9717	21.9181 min, 2.444 s	0.143	835
5-Methyl-1,3-cyclohexanedione	1.13	69.01	XIC(69.01Â±500ppm)	5668086	1020	926	21.9181 min, 5.665 s	0.194	766
Dinocap	1.47	69.08	XIC(69.08Â±500ppm)	33570092	1130	4147	22.0015 min, 2.049 s	0.203	702
Cyclohexane, 1,1'-(1,4-butanediyl)bis-	0.55	83.09	XIC(83.09Â±500ppm)	68332010	1105	8468	22.0015 min, 2.107 s	0.11	749
4,7-Ethano-1H-indene, octahydro-	1.05	122.11	XIC(122.11Â±500ppm)	3865588	416	875	22.0015 min, 2.783 s	0.136	868
Catechol	1.06	110.04	XIC(110.04Â±500ppm)	1985898	337	479	22.0015 min, 3.520 s	0.116	780
Naphthalene, decahydro-1,6-dimethyl-	0.54	95.09	XIC(95.09Â±500ppm)	135811342	1945	10067	22.0848 min, 2.414 s	0.174	846
1-Propanol, 2-methyl-	1.1	43.04	XIC(43.04Â±500ppm)	16918243	750	555	22.0848 min, 2.985 s	0.107	730
1,4:3,6-Dianhydro-a-d-glucopyranose	1.07	69.05	XIC(69.05Â±500ppm)	23118752	1829	1445	22.0848 min, 4.868 s	0.182	895
3-Pyridinol, 4-methyl-, acetate (ester)	1.33	109.06	XIC(109.06Â±500ppm)	1880541	441	440	22.1682 min, 3.776 s	0.152	874
1H-Pyrazole, 4,5-dihydro-5-propyl-	6.07	69.09	XIC(69.09Â±500ppm)	5564755	580	1001	22.2515 min, 1.856 s	0.147	725
Cyclopentane, 1-hydroxymethyl-1,3-dimethyl-	2.72	55.07	XIC(55.07Â±500ppm)	8830708	204	1533	22.2515 min, 1.960 s	0.087	711
Cyclooctane, 1,2-diethyl-	1.47	69.08	XIC(69.08Â±500ppm)	68087429	618	6405	22.2515 min, 2.061 s	0.111	811
Trans-tricyclo[6.2.1.0(2.6)]undecane	0.99	121.1	XIC(121.10Â±500ppm)	8103622	901	1650	22.2515 min, 2.820 s	0.14	797
2(3H)-Naphthalenone,4,4a,5,6,7,8-hexahydro-4a-methyl-	0.5	79.06	XIC(79.06Â±500ppm)	2885998	231	502	22.3348 min, 2.573 s	0.127	716
1,3-Dimethyladamantan-5-carboxylic acid, ethyl ester	0.3	41.06	XIC(41.06Â±500ppm)	3040177	349	247	22.4182 min, 2.505 s	0.141	709
Tetracyclo[5.2.1.0(2,6).0(3,5)]decane, 4,4-dimethyl-	0.21	95.09	XIC(95.09Â±500ppm)	10369786	479	1730	22.4182 min, 2.551 s	0.137	802
Naphthalene, 1,2,3,4-tetrahydro-2-methyl-	1.12	104.06	XIC(104.06Â±500ppm)	3016284	690	618	22.4182 min, 3.146 s	0.121	774
Spiro[5.6]dodecane	0.41	95.09	XIC(95.09Â±500ppm)	107761248	1255	9467	22.5849 min, 2.434 s	0.145	852
3,4-Anhydro-d-galactosan	0.47	43.04	XIC(43.04Â±500ppm)	1102549	127	77	22.5849 min, 4.986 s	0.14	795
5-Cyclohexyl-1-pentene	0.14	67.07	XIC(67.07Â±500ppm)	10428695	723	1182	22.6682 min, 2.702 s	0.132	837
Cyclohexane, 2-butyl-1,1,3-trimethyl-	1.15	55.07	XIC(55.07Â±500ppm)	138711981	5734	9542	22.7515 min, 2.135 s	0.175	884
Benzofuran, 2,3-dihydro-	1.17	120.06	XIC(120.06Â±500ppm)	2556403	916	778	22.7515 min, 3.553 s	0.12	850
Bis(hexahydro-7a-methyl-3-oxo-3H-pyrrolizin-5-yl)ether	1.16	139.15	XIC(139.15Â±500ppm)	3285617	301	1732	22.8349 min, 2.045 s	0.142	755
Naphthalene, 2-ethyldecahydro-	0.67	81.07	XIC(81.07Â±500ppm)	91217506	2489	7904	22.8349 min, 2.398 s	0.127	782
Chloral	1.03	57.09	XIC(57.09Â±500ppm)	447091	116	57	22.8349 min, 3.036 s	0.116	720
Cyclopropane, 1-chloro-1-methyl-2-phenyl-	1	131.09	XIC(131.09Â±500ppm)	2470067	353	521	22.8349 min, 3.231 s	0.129	750
Benzene, 1-[(2-bromophenoxy)methyl]-3,4-dimethoxy-	0.22	151.15	XIC(151.15Â±500ppm)	1604828	270	788	22.9182 min, 2.523 s	0.135	791
2,3-Anhydro-d-mannosan	1.05	71.02	XIC(71.02Â±500ppm)	2878602	405	695	22.9182 min, 4.857 s	0.165	820
Decane, 1-iodo-	2.49	57.09	XIC(57.09Â±500ppm)	272720226	2261	15270	23.1682 min, 1.836 s	0.107	870
Cyclohexene, 2-butyl-1,3,3-trimethyl-	1.27	109.1	XIC(109.10Â±500ppm)	42304762	966	5982	23.1682 min, 2.254 s	0.126	711
1H-Indene, 1-ethylideneoctahydro-7a-methyl-, (1Z,3aa,7aÃŸ)-	0.18	81.07	XIC(81.07Â±500ppm)	44721000	941	3267	23.1682 min, 2.652 s	0.129	722
1H-Inden-1-ol, 2,3-dihydro-	1.37	115.06	XIC(115.06Â±500ppm)	674272	266	143	23.1682 min, 4.038 s	0.167	738
5-Hydroxymethylfurfural	1.14	41.06	XIC(41.06Â±500ppm)	1425981	341	82	23.1682 min, 4.651 s	0.144	772
Cis-3-ethyl-endo-tricyclo[5.2.1.0(2.6)]decane	0.2	95.09	XIC(95.09Â±500ppm)	30855586	650	4303	23.2516 min, 2.591 s	0.132	751
2-Ethyl-2,3-dihydro-1H-indene	1.16	117.07	XIC(117.07Â±500ppm)	9488916	1119	1319	23.2516 min, 3.101 s	0.121	843
2-Isopropoxyphenol	1.07	110.04	XIC(110.04Â±500ppm)	9096663	1049	1297	23.2516 min, 3.831 s	0.131	832
Benzene, 1,3-dimethyl-5-(1-methylethyl)-	1.07	133.11	XIC(133.11Â±500ppm)	4195163	816	1342	23.3349 min, 2.956 s	0.117	823
Cyclopentanespiro-2'-bicyclo[1.1.0]butane-4'-spirocyclopentane	0.66	79.06	XIC(79.06Â±500ppm)	34981631	635	2408	23.4183 min, 2.627 s	0.205	750
hydrazine, (4-butylphenyl)-	0.92	121.1	XIC(121.10Â±500ppm)	21662832	1487	4233	23.4183 min, 2.673 s	0.143	713
Acetic acid, trifluoro-, anhydride	1.13	69.07	XIC(69.07Â±500ppm)	62828673	1144	5219	23.5016 min, 2.074 s	0.245	815
Dimethylphosphinic fluoride	2.41	81.07	XIC(81.07Â±500ppm)	44602208	431	4616	23.5016 min, 2.183 s	0.294	734
3(2H)-Furanone, 2-hexyl-5-methyl-	1.38	98.04	XIC(98.04Â±500ppm)	2751807	1416	764	23.5016 min, 3.358 s	0.129	744
Cyclohexane, (cyclopentylmethyl)-	0.34	55.07	XIC(55.07Â±500ppm)	104150095	1611	6637	23.5849 min, 2.382 s	0.131	822
Benzenepropanenitrile	1.89	91.06	XIC(91.06Â±500ppm)	1707568	266	154	23.5849 min, 4.572 s	0.189	732
2,3-Dihydro-1-oxo-1H-phenalene	1.59	182.22	XIC(182.22Â±500ppm)	4314603	549	2964	23.7516 min, 1.987 s	0.164	733
7-Octylidenebicyclo[4.1.0]heptane	0.18	81.07	XIC(81.07Â±500ppm)	112124871	1825	6956	23.7516 min, 2.700 s	0.142	768
1,2,3-Propanetriol, 1-acetate	1.17	43.04	XIC(43.04Â±500ppm)	46125475	2609	2191	23.9183 min, 3.611 s	0.126	891
Cyclooctane, 1-methyl-3-propyl-	1.26	69.08	XIC(69.08Â±500ppm)	85309779	1365	6838	24.1683 min, 2.079 s	0.192	773
trans,trans- and trans,cis-1,8-Dimethylspiro[5.5]undecane	0.96	95.09	XIC(95.09Â±500ppm)	102527973	836	7258	24.1683 min, 2.276 s	0.222	702
1,2-Dimethyl-4-oxocyclohex-2-enecarboxaldehyde	1.42	41.06	XIC(41.06Â±500ppm)	258442	113	18	24.1683 min, 3.182 s	0.118	713
Glycerol 1,2-diacetate	1.04	43.04	XIC(43.04Â±500ppm)	26142507	1196	1231	24.1683 min, 3.643 s	0.139	883
4-Piperidinone, 1,2,5-trimethyl-	1.08	44.07	XIC(44.07Â±500ppm)	648637	106	27	24.1683 min, 3.892 s	0.145	749
2,3-Dioxabicyclo[2.2.1]heptane	1.06	56.05	XIC(56.05Â±500ppm)	2353840	673	266	24.1683 min, 5.532 s	0.211	736
Undecane, 2,4-dimethyl-	2.24	43.07	XIC(43.07Â±500ppm)	121072166	5134	5705	24.335 min, 1.855 s	0.096	874
2-Hexyne, 4-methyl-	2.14	41.06	XIC(41.06Â±500ppm)	26822893	186	1244	24.335 min, 2.032 s	0.068	708
Naphthalene, decahydro-2,6-dimethyl-3-octyl-	1.18	165.17	XIC(165.17Â±500ppm)	43779733	753	14831	24.335 min, 2.364 s	0.186	704
2-Propenenitrile, 3-phenyl-, (E)-	2.21	129.06	XIC(129.06Â±500ppm)	967280	165	218	24.335 min, 4.443 s	0.159	786
Hexane, 2,4,4-trimethyl-	4.01	57.08	XIC(57.08Â±500ppm)	43549651	1540	6141	24.4183 min, 1.825 s	0.116	708
2-Propen-1-amine	0.76	57.09	XIC(57.09Â±500ppm)	28384413	259	2944	24.4183 min, 2.073 s	0.195	704
Benzene, 1-methoxy-4-(1-methylpropyl)-	0.41	135.12	XIC(135.12Â±500ppm)	36975300	867	5132	24.4183 min, 2.750 s	0.172	725
cis,trans-2-Ethylbicyclo[4.4.0]decane	0.34	81.07	XIC(81.07Â±500ppm)	113562594	1311	7896	24.5017 min, 2.495 s	0.124	848
Benzene, (1,2-dicyclopropyl-2-phenylethyl)-	1.05	131.09	XIC(131.09Â±500ppm)	6563749	695	1264	24.6684 min, 3.209 s	0.167	749
Dodecane, 2-methyl-	1.08	43.07	XIC(43.07Â±500ppm)	239465816	4707	7764	24.7517 min, 1.854 s	0.104	945
Cyclopentanecarboxylic acid, ethenyl ester	1.4	69.08	XIC(69.08Â±500ppm)	68254091	195	5512	24.7517 min, 2.055 s	0.038	742
N-(9,10-Dioxo-9,10-dihydro-anthracen-1-yl)-3,4-dimethoxy-benzamide	0.93	165.17	XIC(165.17Â±500ppm)	22297921	833	6276	24.7517 min, 2.378 s	0.163	776
cis-anti-trans-Tricyclo[7.3.0.0(2,6)]dodecane	0.26	121.1	XIC(121.10Â±500ppm)	15563979	388	2469	24.7517 min, 2.763 s	0.157	810
Cyclohexane, 1-ethyl-1,4-dimethyl-, trans-	1.24	69.08	XIC(69.08Â±500ppm)	74701659	962	7031	24.835 min, 2.055 s	0.152	717
cis, cis-2-Ethylbicyclo[4.4.0]decane	0.23	81.07	XIC(81.07Â±500ppm)	72273334	898	5822	24.835 min, 2.562 s	0.127	868
(3aS,8aR)-2,3,5,6,7,8-hexahydro-3a,8a-methano-1H,4H-azulen-1-one	0.22	121.1	XIC(121.10Â±500ppm)	1983721	193	498	25.0851 min, 2.735 s	0.129	704
Naphthalene, 6-ethyl-1,2,3,4-tetrahydro-	1.17	145.11	XIC(145.11Â±500ppm)	3628107	483	1056	25.0851 min, 2.927 s	0.105	838
6-Tridecene, 7-methyl-	0.86	69.08	XIC(69.08Â±500ppm)	151818699	2288	9740	25.2517 min, 2.088 s	0.165	835
Benzene, (3-methylcyclopentyl)-	0.98	104.07	XIC(104.07Â±500ppm)	867248	240	221	25.2517 min, 2.963 s	0.107	774
Hydroquinone	1.18	110.04	XIC(110.04Â±500ppm)	7175958	1124	1137	25.2517 min, 4.157 s	0.144	856
1H-Inden-1-one, 2,3-dihydro-	1.3	104.07	XIC(104.07Â±500ppm)	2364813	666	452	25.2517 min, 4.679 s	0.167	882
Cyclohexane, (2-ethyl-1-methylbutylidene)-	0.66	95.09	XIC(95.09Â±500ppm)	130925977	1984	8627	25.3351 min, 2.317 s	0.122	802
Benzene, pentamethyl-	1.12	133.11	XIC(133.10Â±500ppm)	27767353	2954	4085	25.3351 min, 3.034 s	0.119	875
4-Hydroxy-2,4,5-trimethyl-2,5-cyclohexadien-1-one	1.07	137.07	XIC(137.07Â±500ppm)	1925082	266	426	25.3351 min, 3.400 s	0.123	716
Benzene, 1,3,5-trimethyl-2-propyl-	0.47	133.11	XIC(133.11Â±500ppm)	2821592	314	691	25.4184 min, 2.725 s	0.107	737
Formamide, N-methyl-N-phenyl-	2.15	106.07	XIC(106.07Â±500ppm)	64322222	1891	2848	25.4184 min, 4.481 s	0.174	938
Isosorbide	1.05	86.04	XIC(86.04Â±500ppm)	2242883	319	734	25.5018 min, 4.746 s	0.152	836
1-Heptylcyclohexene	0.47	95.09	XIC(95.09Â±500ppm)	220956563	1275	12605	25.5851 min, 2.352 s	0.162	754
Cyclohexene,1-cyclohexyl-	0.15	67.07	XIC(67.07Â±500ppm)	20528179	800	1429	25.5851 min, 2.741 s	0.136	768
Cyclohexanecarboxylic acid, 4-ethyl-, 4-butoxyphenyl ester	1.5	55.08	XIC(55.08Â±500ppm)	2290670	284	104	25.6684 min, 2.660 s	0.115	731
Adamantane	0.18	93.07	XIC(93.07Â±500ppm)	3621210	227	614	25.6684 min, 2.773 s	0.132	712
1H-Indene, 2,3-dihydro-1,1,3-trimethyl-	1.06	145.11	XIC(145.11Â±500ppm)	952633	286	363	25.6684 min, 2.916 s	0.107	798
trans,trans-1,6-Dimethylspiro[4.5]decane	0.31	81.07	XIC(81.07Â±500ppm)	5476310	264	598	25.7518 min, 2.669 s	0.138	755
cis-anti-cis-Tricyclo[7.3.0.0(2,6)]dodecane	0.17	121.11	XIC(121.11Â±500ppm)	3578552	392	1032	25.7518 min, 2.815 s	0.127	789
Benzenamine, 4-chloro-N-methyl-	1.23	140.03	XIC(140.03Â±500ppm)	1082285	438	599	25.7518 min, 4.126 s	0.132	807
4,6-O-Furylidene-d-glucopyranose	0.79	97.1	XIC(97.10Â±500ppm)	85283239	3334	15996	25.8351 min, 2.075 s	0.162	734
Cyclohexene, 1-(2-nitro-2-propenyl)-	1.07	120.1	XIC(120.10Â±500ppm)	1297142	266	391	25.8351 min, 3.049 s	0.138	707
Naphthalene, 1,2,3,4-tetrahydro-6-methyl-	1.09	131.09	XIC(131.09Â±500ppm)	2012128	513	417	25.8351 min, 3.416 s	0.126	884
Resorcinol	1.13	110.04	XIC(110.04Â±500ppm)	19299778	1164	2128	25.8351 min, 3.981 s	0.129	878
1,1'-Bicyclohexyl, 2-methyl-, cis-	0.6	55.07	XIC(55.07Â±500ppm)	70830352	711	4323	25.9185 min, 2.265 s	0.129	725
(4aS,8R)-4a,8-Dimethyl-4,4a,5,6,7,8-hexahydronaphthalen-2(3H)-one	0.31	107.09	XIC(107.09Â±500ppm)	19369442	486	1968	25.9185 min, 2.597 s	0.126	715
Dispiro[4.0.4.1]undecan-1-one	1.04	97.07	XIC(97.07Â±500ppm)	8678468	1005	1143	26.0018 min, 3.396 s	0.136	739
Naphthalene, decahydro-2,2-dimethyl-	0.57	95.09	XIC(95.09Â±500ppm)	63816592	903	5416	26.0851 min, 2.394 s	0.161	736
Benzene, 4-(2-butenyl)-1,2-dimethyl-, (E)-	0.97	145.11	XIC(145.11Â±500ppm)	2543184	315	747	26.0851 min, 2.929 s	0.111	759
9-Octadecyne	0.86	81.07	XIC(81.07Â±500ppm)	51727770	736	4674	26.1685 min, 2.308 s	0.195	707
1,3-Di-O-acetyl-a-ÃŸ-d-ribopyranose	1.17	43.04	XIC(43.04Â±500ppm)	15953529	1379	598	26.2518 min, 4.088 s	0.156	737
1,1'-Bicyclohexyl	1.06	82.08	XIC(82.08Â±500ppm)	198977431	4294	16780	26.3352 min, 2.560 s	0.12	924
Acetamide, N-methyl-N-phenyl-	1.8	106.07	XIC(106.07Â±500ppm)	2259159	342	341	26.3352 min, 4.144 s	0.166	900
Cyclohexane, 1-(cyclohexylmethyl)-2-methyl-, cis-	1.22	55.07	XIC(55.07Â±500ppm)	123403891	1403	6541	26.4185 min, 2.113 s	0.1	728
Tricyclo[7.3.0.0(2,6)]-8-dodecen-3-ol, (3R,S)-trans-anti-	1.16	131.09	XIC(131.09Â±500ppm)	6163114	386	905	26.4185 min, 3.110 s	0.142	705
Ethyl 2,3-epoxybutyrate	1.06	45.06	XIC(45.06Â±500ppm)	16029344	698	616	26.5018 min, 5.285 s	0.182	728
Cyclohexane, 1,2-dimethyl-3-pentyl-4-propyl-	1.3	55.07	XIC(55.07Â±500ppm)	67221860	921	5585	26.6685 min, 2.127 s	0.11	756
Benzaldehyde, 3-hydroxy-	1.16	122.04	XIC(122.04Â±500ppm)	5708223	900	1068	26.6685 min, 4.096 s	0.132	933
m-Menthane, (1S,3S)-(+)-	0.38	97.1	XIC(97.10Â±500ppm)	35358177	1157	9220	26.7519 min, 2.107 s	0.102	755
1-Benzofuran-5-ol	1.14	134.04	XIC(134.04Â±500ppm)	702315	200	278	26.7519 min, 3.953 s	0.131	709
5-Acetoxymethyl-2-furaldehyde	0.49	126.04	XIC(126.04Â±500ppm)	1349204	365	585	26.7519 min, 4.253 s	0.133	855
Cyclodecene, 1-ethyl-2-methyl-	0.38	95.09	XIC(95.09Â±500ppm)	124856412	1785	9786	26.8352 min, 2.421 s	0.159	783
1,4-Ethanonaphthalene, decahydro-	1.1	67.07	XIC(67.07Â±500ppm)	756535	156	66	26.8352 min, 2.911 s	0.128	773
4-Undecene, 3-methyl-, (Z)-	1.71	55.07	XIC(55.07Â±500ppm)	46333700	1643	4059	26.9185 min, 2.073 s	0.233	743
Tricyclo[4.3.1.1<2,5>]undec-3-en-10-ol, 10-methyl-, stereoisomer	1.07	109.07	XIC(109.07Â±500ppm)	8578570	1246	979	26.9185 min, 3.154 s	0.138	753
1H-Inden-1-one, 2,3-dihydro-3-methyl-	1.65	131.06	XIC(131.06Â±500ppm)	1030159	197	218	26.9185 min, 4.284 s	0.156	798
Naphthalene, 1,2,3,4-tetrahydro-2,6-dimethyl-	1.27	118.08	XIC(118.08Â±500ppm)	1881793	675	394	27.0019 min, 3.085 s	0.126	861
Cyclohexanone, 2-cyclohexylidene-	0.25	81.08	XIC(81.08Â±500ppm)	12330682	492	1042	27.0852 min, 2.664 s	0.143	727
7a-Methyl-3-methylenehexahydrobenzofuran-2-one	1.52	123.09	XIC(123.09Â±500ppm)	3129270	501	394	27.0852 min, 3.479 s	0.154	757
D-erythro-Pentose, 2-deoxy-	2.74	45.05	XIC(45.05Â±500ppm)	5220123	784	232	27.0852 min, 4.739 s	0.179	810
Formamide, N-phenyl-	1.27	93.06	XIC(93.06Â±500ppm)	717041	270	115	27.0852 min, 5.022 s	0.183	701
Cyclooctane, ethyl-	1.04	69.08	XIC(69.08Â±500ppm)	154769899	775	10923	27.1686 min, 2.064 s	0.158	734
Naphthalene, 2-butyldecahydro-	0.65	81.07	XIC(81.07Â±500ppm)	169069284	1097	10188	27.2519 min, 2.383 s	0.101	734
3-Methoxy-5-methylphenol	1.19	138.07	XIC(138.07Â±500ppm)	1922872	294	540	27.2519 min, 3.785 s	0.127	821
1H-Fluorene, dodecahydro-	0.13	67.07	XIC(67.07Â±500ppm)	21087061	865	1377	27.3352 min, 2.833 s	0.12	753
Piperidine, 1-pentyl-	5.6	98.11	XIC(98.11Â±500ppm)	2331241	185	737	27.4186 min, 1.881 s	0.141	713
Cyclohexane, 1,1'-methylenebis-	0.56	55.07	XIC(55.07Â±500ppm)	22371988	259	2597	27.4186 min, 2.333 s	0.073	721
Cyclobutanone, 2,3,3-trimethyl-	6.72	41.06	XIC(41.06Â±500ppm)	32936356	995	1432	27.5019 min, 1.873 s	0.644	771
Naphthalene, 1,2,3,4-tetrahydro-1,1,6-trimethyl-	1.07	159.12	XIC(159.12Â±500ppm)	502198	150	258	27.5019 min, 2.815 s	0.101	724
1-Octene, 6-methyl-	2.41	55.07	XIC(55.07Â±500ppm)	128985177	960	6811	27.5853 min, 2.008 s	0.144	787
Naphthalene, 5-ethyl-1,2,3,4-tetrahydro-	0.38	131.09	XIC(131.09Â±500ppm)	720692	163	209	27.5853 min, 3.037 s	0.107	795
1,2-Benzenediol, 3-methyl-	3.73	124.06	XIC(124.06Â±500ppm)	1375775	401	491	27.6686 min, 3.782 s	0.135	769
1,3-Benzenediol, 2-methyl-	1.1	124.06	XIC(124.06Â±500ppm)	4704260	398	1193	27.6686 min, 4.076 s	0.131	911
Phosphonic acid, ethyl hexyl ester	2.8	83.09	XIC(83.09Â±500ppm)	55313117	1361	8835	27.8353 min, 2.018 s	0.213	713
2-Pyrazoline, 1-isobutyl-3-methyl-	0.28	97.1	XIC(97.10Â±500ppm)	20301824	384	3655	27.8353 min, 2.432 s	0.162	727
2-Cyclohexylcyclohexanol	1.1	67.07	XIC(67.07Â±500ppm)	1066684	155	98	27.8353 min, 3.006 s	0.117	809
1H-Indene-1,3(2H)-dione, 2-(9H-xanthene-9-yl)-	0.95	181.2	XIC(181.20Â±500ppm)	2476646	591	1438	27.9186 min, 2.040 s	0.092	766
Cyclohexane, 1,1,2,3-tetramethyl-	1.14	69.08	XIC(69.08Â±500ppm)	55134627	719	7838	27.9186 min, 2.146 s	0.117	756
Cyclooctanemethanol	0.54	67.07	XIC(67.07Â±500ppm)	22556042	613	1906	27.9186 min, 2.460 s	0.177	706
Naphthalene, 1,2,3,4-tetrahydro-1,6,8-trimethyl-	1.07	159.12	XIC(159.12Â±500ppm)	2859417	392	1003	27.9186 min, 2.926 s	0.118	829
Cyclohexane, nitro-	2.33	55.07	XIC(55.07Â±500ppm)	71202220	559	5688	28.002 min, 2.014 s	0.102	747
5-((5R,8aR)-8-Butyloctahydroindolizin-5-yl)pentan-2-ol	1.18	180.2	XIC(180.20Â±500ppm)	13189731	267	4877	28.002 min, 2.482 s	0.169	820
Propan-2-one, 1-(4-isopropoxy-3-methoxyphenyl)-	0.33	137.14	XIC(137.14Â±500ppm)	11435888	492	3723	28.002 min, 2.484 s	0.142	804
2(3H)-Furanone, 5-acetyldihydro-	1.24	85.03	XIC(85.03Â±500ppm)	6009873	1341	1113	28.0853 min, 5.092 s	0.169	842
3-Tetradecene, (E)-	3.6	55.07	XIC(55.07Â±500ppm)	35900605	1491	3389	28.1686 min, 1.987 s	0.206	793
Bicyclo[4.1.0]heptane, 3-methyl-7-pentyl-	0.38	95.09	XIC(95.09Â±500ppm)	42666989	298	3141	28.1686 min, 2.534 s	0.138	803
Cyclotridecane	1.17	41.05	XIC(41.05Â±500ppm)	61614905	2178	4369	28.252 min, 2.091 s	0.09	831
1(3H)-Isobenzofuranone	1.39	105.04	XIC(105.04Â±500ppm)	2466647	514	330	28.252 min, 5.421 s	0.195	899
Perhydrophenalene, (3aa, 6aa, 9aa, 9bÃŸ)-	0.14	81.08	XIC(81.08Â±500ppm)	6235484	695	808	28.4187 min, 2.777 s	0.122	796
Propane-1,2-diyl bis((E)-2-methylbut-2-enoate)	5.55	83.09	XIC(83.09Â±500ppm)	4887876	280	742	28.502 min, 1.895 s	0.084	718
1,4-Benzenedicarboxaldehyde, 2-methyl-	1.16	148.06	XIC(148.06Â±500ppm)	1149299	358	452	28.502 min, 3.944 s	0.129	838
4-Dodecene, (E)-	2.85	55.07	XIC(55.07Â±500ppm)	51616371	803	5215	28.5853 min, 2.023 s	0.13	759
trans-8-Ethyl-bicyclo[4.3.0]non-3-ene	0.27	121.1	XIC(121.10Â±500ppm)	16312532	773	2807	28.5853 min, 2.678 s	0.113	739
Benzene, (1-methylhexyl)-	1.02	105.07	XIC(105.07Â±500ppm)	5791162	747	892	28.5853 min, 2.969 s	0.113	781
Acenaphthylene, dodecahydro-	1.15	67.07	XIC(67.07Â±500ppm)	1122449	175	84	28.5853 min, 3.714 s	0.137	723
Orcinol	1.23	124.06	XIC(124.06Â±500ppm)	6255192	560	1284	28.5853 min, 4.067 s	0.131	868
Phenol, 2-(1,1-dimethylethyl)-4-methyl-	1.14	149.1	XIC(149.10Â±500ppm)	19780439	1339	1674	28.6687 min, 3.017 s	0.116	873
Benzofuran, 2-methyl-	1.25	132.06	XIC(132.06Â±500ppm)	777796	283	254	28.6687 min, 4.139 s	0.141	743
2,3-Anhydro-d-galactosan	1.39	43.04	XIC(43.04Â±500ppm)	768818	186	34	28.6687 min, 5.045 s	0.173	831
Hexane, 2,2,5,5-tetramethyl-	1.13	57.09	XIC(57.09Â±500ppm)	22783007	116	1912	28.752 min, 2.036 s	0.054	806
Benzene, 1,4-dimethyl-2-(2-methylpropyl)-	1.12	119.09	XIC(119.09Â±500ppm)	11923976	1526	2297	28.752 min, 2.597 s	0.095	723
Eugenol	1.05	164.09	XIC(164.09Â±500ppm)	753897	256	278	28.8354 min, 3.459 s	0.115	870
trans-1-Butenylcyclopentane	1.01	95.06	XIC(95.06Â±500ppm)	1500415	208	192	28.8354 min, 4.387 s	0.144	762
1,6-Anhydro-3,4-dideoxy-ÃŸ-D-gluco-hexopyranose	0.62	41.06	XIC(41.06Â±500ppm)	2377401	505	108	28.8354 min, 5.629 s	0.182	769
Tridecane, 4-methyl-	1.2	43.07	XIC(43.07Â±500ppm)	149281208	5149	7182	28.9187 min, 1.865 s	0.095	882
Benzene, 1,3,5-tris(1-methylethyl)-	1.13	189.17	XIC(189.17Â±500ppm)	2093174	714	1527	28.9187 min, 2.386 s	0.106	747
Cyclooctyl bromide	1.63	55.07	XIC(55.07Â±500ppm)	65336948	939	6414	29.0854 min, 2.044 s	0.118	712
Benzaldehyde, 4-hydroxy-	1.21	121.03	XIC(121.03Â±500ppm)	9758768	1318	1482	29.0854 min, 4.228 s	0.139	868
2-p-Tolylpyridine	0.57	169.2	XIC(169.20Â±500ppm)	4322066	309	1951	29.1687 min, 1.897 s	0.07	749
5-Tetradecene, (Z)-	2.07	55.07	XIC(55.07Â±500ppm)	65741529	1178	6464	29.1687 min, 2.030 s	0.202	753
Bicyclo[10.1.0]tridec-1-ene	0.18	67.07	XIC(67.07Â±500ppm)	27712634	642	1680	29.1687 min, 2.698 s	0.125	790
Carbon dioxide	1.38	44.01	XIC(44.01Â±500ppm)	3376995	108	77	29.2521 min, 3.597 s	0.05	884
2,4-Dimethylpentan-3-yl (E)-2-methylbut-2-enoate	2.29	83.09	XIC(83.09Â±500ppm)	61114018	450	7984	29.3354 min, 2.067 s	0.145	711
9H-Fluorene, 9-bromo-	0.44	165.17	XIC(165.17Â±500ppm)	8331007	405	2432	29.3354 min, 2.370 s	0.138	762
Ethanol, 2-(2-butoxyethoxy)-, acetate	4.86	43.04	XIC(43.04Â±500ppm)	816004	270	67	29.3354 min, 2.910 s	0.101	815
11-Methylenetricyclo[4.3.1.1(2,5)]undecan-10-one	0.93	176.16	XIC(176.16Â±500ppm)	3173965	358	1117	29.4187 min, 3.064 s	0.134	777
L-Proline, 5-oxo-, methyl ester	1.16	84.05	XIC(84.05Â±500ppm)	29366202	1860	2400	29.5021 min, 5.155 s	0.168	931
1,8,11-Heptadecatriene, (Z,Z)-	1.76	81.08	XIC(81.08Â±500ppm)	12683752	297	501	29.5854 min, 2.732 s	0.111	763
2-Hexylbicyclo[2.2.2]octane	0.76	95.09	XIC(95.09Â±500ppm)	225750095	1091	9989	29.6688 min, 2.313 s	0.192	783
1,3-Benzenediol, 2,5-dimethyl-	1.2	138.07	XIC(138.07Â±500ppm)	810957	231	298	29.7521 min, 4.150 s	0.134	849
Cyclohexane, 1,1,3-trimethyl-2-(3-methylpentyl)-	1.16	69.08	XIC(69.08Â±500ppm)	185545511	1328	9319	29.9188 min, 2.115 s	0.124	781
2-Cyclopenten-1-one, 3-(1-methylethyl)-	1.09	67.07	XIC(67.07Â±500ppm)	5228673	798	328	29.9188 min, 4.358 s	0.161	805
a-D-Galactopyranoside, methyl	1.06	74.05	XIC(74.05Â±500ppm)	4303625	377	556	29.9188 min, 4.869 s	0.158	746
2,6-Diisopropylanisole	1.08	177.1	XIC(177.10Â±500ppm)	6953765	1049	1161	30.0021 min, 3.039 s	0.116	743
6-tert-Butyl-2,4-dimethylphenol	1.08	163.12	XIC(163.12Â±500ppm)	5739044	496	837	30.0855 min, 3.098 s	0.117	781
1,2,5-Oxadiazole, 3,4-bis(2-thienylcarbonylamino)-	1.95	111.12	XIC(111.12Â±500ppm)	26370461	359	6590	30.1688 min, 2.055 s	0.228	718
Naphthalene, 2-ethyl-	1.09	141.08	XIC(141.08Â±500ppm)	15181078	2682	2767	30.1688 min, 3.631 s	0.118	904
3-Methylene-1-oxa-spiro[4.5]decan-2-one	1.22	55.04	XIC(55.04Â±500ppm)	14146956	1167	807	30.2521 min, 3.375 s	0.111	793
2,4-Pentanediol, 3-nitro-, diacetate	4	43.04	XIC(43.04Â±500ppm)	4080130	217	255	30.2521 min, 4.237 s	0.181	706
Cyclobutanecarboxylic acid, 2-ethylcyclohexyl ester	0.93	81.07	XIC(81.07Â±500ppm)	66382333	552	3954	30.3355 min, 2.313 s	0.237	704
Naphthalene, 1-ethyl-	1.01	141.08	XIC(141.08Â±500ppm)	5520909	635	1000	30.3355 min, 3.773 s	0.125	884
Cyclopentane, 1-hexyl-3-methyl-	1.97	55.07	XIC(55.07Â±500ppm)	227122661	3412	10202	30.4188 min, 2.035 s	0.169	749
3-Hydroxy-2-methylbenzaldehyde	1.14	135.05	XIC(135.05Â±500ppm)	1335118	269	285	30.4188 min, 4.120 s	0.135	858
2-n-Propyladamantane	0.14	135.12	XIC(135.12Â±500ppm)	2054338	271	489	30.5022 min, 2.968 s	0.12	719
Diphenylmethane	1.02	168.1	XIC(168.10Â±500ppm)	1858324	581	987	30.5022 min, 3.571 s	0.119	845
Ethanone, 1-(3-hydroxyphenyl)-	1.18	121.03	XIC(121.03Â±500ppm)	5926004	1476	1421	30.5022 min, 4.220 s	0.135	916
Vanillin	1.14	151.05	XIC(151.05Â±500ppm)	38252796	1810	4059	30.5022 min, 4.584 s	0.147	936
Naphthalene, 1,7-dimethyl-	1.09	156.1	XIC(156.10Â±500ppm)	65039888	3675	9401	30.5855 min, 3.623 s	0.128	931
Cyclohexane, 1-ethyl-1-methyl-	0.66	97.1	XIC(97.10Â±500ppm)	172156915	2164	14487	30.6688 min, 2.119 s	0.09	788
1,3-Isobenzofurandione, 4-methyl-	0.97	90.06	XIC(90.06Â±500ppm)	1005807	252	309	30.6688 min, 4.700 s	0.14	881
1,1'-Bicyclohexyl, 4,4'-dimethyl-	0.39	55.07	XIC(55.07Â±500ppm)	41297721	913	1950	30.7522 min, 2.363 s	0.119	799
2-Methyl-2-butyl-1,3-benzodioxole	1.11	135.12	XIC(135.12Â±500ppm)	8119789	293	1286	30.8355 min, 2.576 s	0.219	736
Dispiro[4.2.4.2]tetradecane	0.63	81.08	XIC(81.08Â±500ppm)	19617779	298	1322	30.9189 min, 2.556 s	0.141	731
2-Methyl-5-hydroxybenzofuran	0.98	147.05	XIC(147.05Â±500ppm)	1783535	276	466	30.9189 min, 3.961 s	0.13	747
Pyridin-3-yl 2-methylbutanoate	1.27	57.09	XIC(57.09Â±500ppm)	1995907	285	186	31.0022 min, 3.363 s	0.109	718
Naphthalene, 1,2,3,4-tetrahydro-5,6-dimethyl-	1.1	145.11	XIC(145.11Â±500ppm)	1433616	179	282	31.0855 min, 3.263 s	0.114	745
Phenol, 5-methoxy-2,3-dimethyl-	1.24	152.09	XIC(152.09Â±500ppm)	990229	262	252	31.0855 min, 3.697 s	0.125	726
1,3-Dimethyl-5-ethyladamantane	0.37	163.16	XIC(163.16Â±500ppm)	4351502	453	1547	31.1689 min, 2.653 s	0.213	732
Cyclohexane, (3-methylpentyl)-	1.45	55.07	XIC(55.07Â±500ppm)	72004496	429	5017	31.2522 min, 2.116 s	0.092	753
(Z)-3-Phenyl-2-propenoic acid	0.88	147.05	XIC(147.05Â±500ppm)	2199443	322	539	31.3356 min, 4.092 s	0.146	734
1H-Indene, octahydro-2,2,4,4,7,7-hexamethyl-, trans-	1.85	43.05	XIC(43.05Â±500ppm)	42254187	5264	1204	31.4189 min, 2.426 s	0.167	808
1,2,3,6,7,8-Hexahydro-as-indacene	1.05	158.12	XIC(158.12Â±500ppm)	830486	336	353	31.4189 min, 3.501 s	0.111	841
3-Picoline, 2-(tert-butylthio)-	0.49	125.14	XIC(125.14Â±500ppm)	22241311	721	5440	31.5022 min, 2.151 s	0.11	736
Cyclohexane, 1-(cyclohexylmethyl)-4-methyl-, cis-	0.32	55.07	XIC(55.07Â±500ppm)	50667343	1227	1930	31.5022 min, 2.379 s	0.098	841
Benzene, [(cyclohex-1-en-1-yl)methyl]-	1.04	104.06	XIC(104.06Â±500ppm)	103765443	3118	10003	31.5856 min, 3.397 s	0.141	807
2,5-Monomethylene-l-rhamnitol	1.09	43.04	XIC(43.04Â±500ppm)	11035113	565	380	31.5856 min, 4.831 s	0.208	723
Benzoic acid, 3-hydroxy-, methyl ester	1.25	121.03	XIC(121.03Â±500ppm)	6778192	643	906	31.6689 min, 3.925 s	0.128	833
Tetradecane, 2-methyl-	4.55	57.09	XIC(57.09Â±500ppm)	64898886	2161	6698	31.7523 min, 1.841 s	0.087	864
Anthracene, 1,2,3,4,4a,9,9a,10-octahydro-	1.05	81.07	XIC(81.07Â±500ppm)	10385233	633	651	31.8356 min, 3.153 s	0.114	758
Cyclohexane, 1-(cyclohexylmethyl)-3-methyl-, trans-	0.39	55.07	XIC(55.07Â±500ppm)	22517484	540	2228	31.9189 min, 2.449 s	0.112	713
1-Methyl-2-methylene-trans-decalin	0.26	81.07	XIC(81.07Â±500ppm)	15570029	384	1012	31.9189 min, 2.631 s	0.114	762
3-Hydroxy-4-methylbenzaldehyde	1.26	135.05	XIC(135.05Â±500ppm)	2214043	578	457	31.9189 min, 4.253 s	0.141	859
Cyclopentadecane	2.26	55.07	XIC(55.07Â±500ppm)	205081643	1301	7838	32.0023 min, 2.032 s	0.141	813
Borane, dipropyl[2-(2-pyridyl)pyrrol-1-yl]-	2.88	155.18	XIC(155.18Â±500ppm)	679103	129	316	32.0856 min, 1.841 s	0.079	741
Oxalic acid, butyl cyclobutyl ester	3.66	55.07	XIC(55.07Â±500ppm)	37656220	546	3356	32.0856 min, 1.992 s	0.095	737
3,5-Dimethoxybenzaldehyde	1.1	166.07	XIC(166.07Â±500ppm)	850318	204	376	32.0856 min, 4.209 s	0.128	807
4-Methylphthalic anhydride	1.12	118.05	XIC(118.05Â±500ppm)	1679933	707	381	32.0856 min, 4.727 s	0.156	854
Benzylamine, N-(3-chloro-2,2-dimethyl-1-propylidene)-a-methyl-	0.35	105.07	XIC(105.07Â±500ppm)	1666151	117	338	32.169 min, 2.876 s	0.11	702
Tridecane, 6-propyl-	2.99	57.09	XIC(57.09Â±500ppm)	73591129	1352	7878	32.2523 min, 1.856 s	0.086	851
5-Methyl-2,4-diisopropylphenol	1.16	177.1	XIC(177.10Â±500ppm)	11721199	1235	1821	32.2523 min, 3.086 s	0.115	764
Naphthalene, 1,2,3,4-tetrahydro-1,6-dimethyl-4-(1-methylethyl)-, (1S-cis)-	2.09	159.12	XIC(159.12Â±500ppm)	1879514	285	658	32.419 min, 2.941 s	0.114	790
E-2-Hexadecacen-1-ol	3.5	55.07	XIC(55.07Â±500ppm)	29742001	4013	2817	32.5023 min, 1.984 s	0.238	705
5-Isopropyl-2,4-imidazolidinedione	1.14	100.03	XIC(100.03Â±500ppm)	11173792	1950	2736	32.5023 min, 4.938 s	0.164	924
Decahydro-1,1,4a,5,6-pentamethylnaphthalene	0.28	69.08	XIC(69.08Â±500ppm)	13392981	346	866	32.5857 min, 2.529 s	0.128	701
Phenol, 2-methoxy-4-(1-propenyl)-	1.2	164.09	XIC(164.09Â±500ppm)	4004513	1139	1211	32.669 min, 3.617 s	0.119	916
p-Hydroxyphenylacetone	1.13	107.05	XIC(107.05Â±500ppm)	4514730	623	724	32.669 min, 4.408 s	0.138	857
Naphthalene, 2-(1-methylethyl)-	1.11	155.09	XIC(155.09Â±500ppm)	552270	206	193	32.7523 min, 3.452 s	0.111	775
Succinic acid, naphth-2-ylmethyl 2,3,4-trifluorophenyl ester	1.98	141.17	XIC(141.17Â±500ppm)	1407946	526	455	32.8357 min, 1.837 s	0.117	770
Cyclohexane, 1-(cyclohexylmethyl)-2-methyl-, trans-	1.19	55.07	XIC(55.07Â±500ppm)	2490428	281	99	32.8357 min, 2.551 s	0.122	727
Tricyclo[4.2.2.0(2,5)]dec-7-ene, 7-butyl-	0.28	91.06	XIC(91.06Â±500ppm)	1152892	119	114	32.8357 min, 2.996 s	0.154	712
Heptadecyl trifluoroacetate	2.45	55.08	XIC(55.08Â±500ppm)	71957414	974	4526	32.919 min, 2.030 s	0.114	703
1-(4-Tolyl)-1-cyclohexene	1.18	172.13	XIC(172.13Â±500ppm)	775669	237	364	33.0024 min, 3.282 s	0.111	759
Methylparaben	1.75	121.03	XIC(121.03Â±500ppm)	3549332	723	768	33.0024 min, 4.019 s	0.137	858
Phenol, 2-methoxy-4-propyl-	1.23	137.07	XIC(137.07Â±500ppm)	7118760	1187	1689	33.0024 min, 4.409 s	0.143	862
Phthalimide	1.15	76.04	XIC(76.04Â±500ppm)	3634677	657	529	33.0024 min, 5.217 s	0.171	919
1,6-Anhydro-a-d-galactofuranose	1.03	73.04	XIC(73.04Â±500ppm)	9570945	828	937	33.0024 min, 5.293 s	0.172	757
Cyclohexane, 1,1'-ethylidenebis-	0.28	69.08	XIC(69.08Â±500ppm)	21743925	640	1699	33.169 min, 2.450 s	0.102	842
1,1,4,5,6-Pentamethyl-2,3-dihydro-1H-indene	1.14	173.14	XIC(173.14Â±500ppm)	1695238	350	748	33.169 min, 2.950 s	0.118	752
Cyclohexene, 1-(1-propynyl)-	1.17	120.1	XIC(120.10Â±500ppm)	1149989	292	219	33.169 min, 3.291 s	0.109	738
Benzene, (1-ethylheptyl)-	1.22	91.06	XIC(91.06Â±500ppm)	7875269	159	659	33.2524 min, 2.430 s	0.103	763
3,4-Heptadiene	0.51	81.08	XIC(81.08Â±500ppm)	33032416	268	3884	33.2524 min, 2.526 s	0.318	748
Benzene, (2-cyclohexylethyl)-	1.11	92.06	XIC(92.06Â±500ppm)	38356458	2454	3197	33.2524 min, 2.811 s	0.097	873
Naphthalene, 1,2-dihydro-1,4,6-trimethyl-	1.11	157.11	XIC(157.11Â±500ppm)	2228477	356	568	33.2524 min, 3.350 s	0.121	772
9H-Pyrrolo[1,2-a]indol-9-one, 2-methyl-	0.67	183.22	XIC(183.22Â±500ppm)	3652126	354	1806	33.3357 min, 1.890 s	0.069	791
Ethanol, 2-[2-(2-butoxyethoxy)ethoxy]-	1.05	45.05	XIC(45.05Â±500ppm)	3837368	331	291	33.4191 min, 3.175 s	0.1	860
1,3-Benzenediol, 4-ethyl-	0.54	123.05	XIC(123.05Â±500ppm)	1205035	234	337	33.4191 min, 3.979 s	0.125	797
1(2H)-Naphthalenone, 7-(1,1-dimethylethyl)-3,4-dihydro-	0.63	187.12	XIC(187.12Â±500ppm)	2208460	356	1274	33.5024 min, 2.899 s	0.111	759
Dichloroacetic acid, 4-hexadecyl ester	1.01	69.08	XIC(69.08Â±500ppm)	148906923	1092	8056	33.5857 min, 2.097 s	0.1	839
6-Methoxy-3-methylbenzofuran	1.16	147.05	XIC(147.05Â±500ppm)	17556848	1531	2267	33.6691 min, 4.174 s	0.134	758
ÃŸ-D-Glucopyranose, 1,6-anhydro-	0.96	60.04	XIC(60.04Â±500ppm)	344826275	9494	10029	33.6691 min, 5.520 s	0.199	909
1-Penten-3-one	10.89	55.08	XIC(55.08Â±500ppm)	3680389	211	311	33.7524 min, 1.855 s	0.125	771
1-Octanesulfonyl chloride	0.5	43.07	XIC(43.07Â±500ppm)	4347488	311	323	33.7524 min, 2.344 s	0.099	722
Anthracene, tetradecahydro-	1.27	81.08	XIC(81.08Â±500ppm)	1233957	397	72	33.7524 min, 2.797 s	0.112	830
Benzeneacetonitrile, 3-hydroxy-	1.17	133.06	XIC(133.06Â±500ppm)	869419	264	198	33.7524 min, 4.971 s	0.168	773
Cyclohexane, 1,1'-(1,2-ethanediyl)bis-	0.5	55.07	XIC(55.07Â±500ppm)	16689022	328	696	33.8358 min, 2.491 s	0.287	717
Acenaphthene	1.1	153.07	XIC(153.07Â±500ppm)	2408015	303	544	33.8358 min, 4.255 s	0.137	880
Heptanoic acid, anhydride	1.14	113.03	XIC(113.03Â±500ppm)	10617030	2098	2421	33.9191 min, 3.500 s	0.124	734
1,1'-Biphenyl, 2-methyl-	1.13	168.1	XIC(168.10Â±500ppm)	12023216	1344	3314	33.9191 min, 3.695 s	0.12	885
Benzaldehyde, 3,4-dimethoxy-	1.23	166.07	XIC(166.07Â±500ppm)	1116990	192	218	33.9191 min, 4.623 s	0.155	809
4,6-Bis(4-ethoxybenzylthio)-5-nitropyrimidine	1.02	135.05	XIC(135.05Â±500ppm)	735309	102	172	34.0024 min, 4.170 s	0.135	775
Perhydrophenanthrene, (4aa, 4bÃŸ, 8aa, 10aÃŸ)-	1.39	81.08	XIC(81.08Â±500ppm)	2479678	286	150	34.0858 min, 2.832 s	0.14	797
4-Hydroxy-3-methylacetophenone	1.13	135.05	XIC(135.05Â±500ppm)	1469042	255	350	34.0858 min, 4.138 s	0.131	798
Apocynin	1.14	151.05	XIC(151.05Â±500ppm)	24256499	1618	3096	34.0858 min, 4.432 s	0.141	871
9-Nonadecene	2.21	55.07	XIC(55.07Â±500ppm)	39958693	1707	2710	34.1691 min, 2.034 s	0.098	856
Phenanthrene, tetradecahydro-	0.2	121.1	XIC(121.10Â±500ppm)	2998870	325	707	34.2525 min, 2.798 s	0.104	754
1,1'-Biphenyl, 4-methyl-	1.09	168.1	XIC(168.10Â±500ppm)	6002332	736	1979	34.2525 min, 3.741 s	0.119	913
Ethanone, 1-(4-hydroxyphenyl)-2-phenyl-	1.26	121.04	XIC(121.04Â±500ppm)	2449054	420	623	34.3358 min, 4.057 s	0.137	709
N8-(3-Chloro-4-fluorophenyl)-N2-(1-methylpiperidin-4-yl)pyrimido[5,4-d]pyrimidine-2,8-diamine	4.47	96.1	XIC(96.10Â±500ppm)	9634342	900	1607	34.4191 min, 2.040 s	0.13	734
2,2'-Dimethylbiphenyl	1.13	167.09	XIC(167.09Â±500ppm)	1234532	663	555	34.4191 min, 3.441 s	0.118	883
4-Hydroxy-2-methylacetophenone	1.14	135.05	XIC(135.05Â±500ppm)	1376167	236	280	34.4191 min, 4.104 s	0.136	783
5H-Tetrazol-5-amine	1.13	57.09	XIC(57.09Â±500ppm)	26622584	217	2593	34.5025 min, 2.021 s	0.146	786
Cyclohexane, 1-(cyclohexylmethyl)-4-methyl-, trans-	0.62	55.07	XIC(55.07Â±500ppm)	9816321	338	935	34.5025 min, 2.396 s	0.103	702
1,E-8,Z-10-Tetradecatriene	1.24	67.07	XIC(67.07Â±500ppm)	2356300	299	126	34.5025 min, 2.710 s	0.099	713
Butyrovanillone	1.12	151.05	XIC(151.05Â±500ppm)	1350419	351	426	34.5858 min, 4.292 s	0.135	744
Naphthalene, 1,4,5-trimethyl-	1.13	155.09	XIC(155.09Â±500ppm)	7027063	1966	1508	34.6692 min, 3.489 s	0.119	851
Anthracene, tetradecahydro-, (4aa,8aa,9aa,10aa)-	0.2	135.12	XIC(135.12Â±500ppm)	2501464	208	454	34.7525 min, 2.849 s	0.109	791
5-Methyl-2-phenyl-2-hexenal	1.03	104.06	XIC(104.06Â±500ppm)	1030584	274	266	34.8358 min, 3.027 s	0.105	733
1,1'-Biphenyl, 2,4'-dimethyl-	1.08	167.09	XIC(167.09Â±500ppm)	1314265	342	404	34.9192 min, 3.498 s	0.119	846
Ethanone, 1-(2,5-dihydroxyphenyl)-	1.11	137.03	XIC(137.03Â±500ppm)	3027484	430	773	34.9192 min, 4.393 s	0.133	897
(p-Hydroxyphenyl)glyoxal	1.09	121.03	XIC(121.03Â±500ppm)	1762532	295	450	35.0025 min, 4.080 s	0.128	763
1-Naphthalenol	1.17	115.06	XIC(115.06Â±500ppm)	1426107	284	224	35.0025 min, 4.482 s	0.156	738
Oxalic acid, cyclohexylmethyl propyl ester	0.41	97.1	XIC(97.10Â±500ppm)	22042894	581	3835	35.0859 min, 2.101 s	0.082	765
4-Methyl-2-pentyl acetate	0.87	43.04	XIC(43.04Â±500ppm)	5033622	168	264	35.0859 min, 4.955 s	0.233	747
2-Hydroxy-5-methylbenzohydrazide	3.74	135.05	XIC(135.05Â±500ppm)	1198155	258	289	35.2525 min, 3.875 s	0.126	884
3,5-Dimethyl-4-hydroxybenzaldehyde	1.1	149.07	XIC(149.07Â±500ppm)	696427	181	217	35.2525 min, 4.051 s	0.13	727
2H-1-Benzopyran-2-one, 3,4-dihydro-6-hydroxy-	1.12	122.04	XIC(122.04Â±500ppm)	14101827	3319	2413	35.2525 min, 5.082 s	0.163	809
cis,syn,cis-Perhydrophenanthrene	1.07	96.09	XIC(96.09Â±500ppm)	635005	143	91	35.3359 min, 2.903 s	0.099	803
Bibenzyl	1.2	91.06	XIC(91.06Â±500ppm)	2177460	260	223	35.3359 min, 3.666 s	0.12	866
Benzoic acid, 4-hydroxy-3-methoxy-, methyl ester	1.09	151.05	XIC(151.05Â±500ppm)	3090083	606	916	35.3359 min, 4.116 s	0.132	879
Cyclopropane, 1-methyl-1-(1-methylethyl)-2-nonyl-	2.3	69.08	XIC(69.08Â±500ppm)	86467208	1335	4288	35.4192 min, 2.009 s	0.255	800
Bicyclo[4.1.0]heptane, 7-(phenylmethylene)-	1.08	116.07	XIC(116.07Â±500ppm)	21708992	2429	2954	35.4192 min, 3.586 s	0.126	772
Naphthalene, 1,6,7-trimethyl-	1.29	44.01	XIC(44.01Â±500ppm)	2550385	105	66	35.5026 min, 3.572 s	0.047	715
Aromadendran ('2')	0.54	55.08	XIC(55.08Â±500ppm)	4889468	295	281	35.5859 min, 2.636 s	0.233	716
Perhydrophenanthrene, (4aa, 4bÃŸ, 8aa, 10a.alpha)-	0.13	135.12	XIC(135.12Â±500ppm)	851067	326	217	35.6692 min, 2.918 s	0.112	863
Benzene, 1-methyl-4-(phenylmethyl)-	1.15	167.09	XIC(167.09Â±500ppm)	24236009	742	4467	35.6692 min, 3.680 s	0.122	877
Benzene, 1,2,3-trimethoxy-5-methyl-	0.86	167.08	XIC(167.08Â±500ppm)	21605489	1260	3654	35.7526 min, 3.746 s	0.145	763
1-Tetracosene	2.53	69.08	XIC(69.08Â±500ppm)	81848405	2181	4275	35.8359 min, 2.008 s	0.214	837
1-Methylbicyclo(4.4.0)decane(cis)	0.76	81.07	XIC(81.07Â±500ppm)	18063900	558	1848	35.8359 min, 2.379 s	0.105	756
1,6:2,3-Dianhydro-4-O-acetyl-ÃŸ-d-mannopyranose	0.31	43.04	XIC(43.04Â±500ppm)	18156407	374	716	35.8359 min, 4.844 s	0.158	721
6-Chloroindole	0.9	151.02	XIC(151.02Â±500ppm)	723997	163	262	35.8359 min, 4.904 s	0.143	706
Benzene, (1-methyl-1-propylpentyl)-	1.1	105.07	XIC(105.07Â±500ppm)	2514542	325	499	35.9193 min, 2.451 s	0.102	737
2-Propanone, 1-(4-hydroxy-3-methoxyphenyl)-	1.1	137.07	XIC(137.07Â±500ppm)	63604251	2789	5851	35.9193 min, 4.306 s	0.14	866
3-Methyl-2-butenoic acid, tridec-2-ynyl ester	2.16	83.09	XIC(83.09Â±500ppm)	12602371	325	2078	36.0859 min, 2.018 s	0.201	702
1-Cyclohexyl-1-(4-methylcyclohexyl)ethane	0.52	55.07	XIC(55.07Â±500ppm)	4578712	168	353	36.0859 min, 2.430 s	0.131	736
Oxetane, 3-(1-methylethyl)-	7.8	55.07	XIC(55.07Â±500ppm)	3599874	227	399	36.1693 min, 1.874 s	0.13	716
Benzaldehyde, 2-hydroxy-4-methoxy-	0.89	152.05	XIC(152.05Â±500ppm)	1039221	144	261	36.1693 min, 4.387 s	0.134	735
Diazodiamantane	1.01	106.08	XIC(106.08Â±500ppm)	4419303	605	630	36.2526 min, 3.392 s	0.125	726
1,2,3,4-Cyclopentanetetrol, (1a,2ÃŸ,3ÃŸ,4a)-	0.43	43.05	XIC(43.05Â±500ppm)	1940866	375	79	36.2526 min, 5.181 s	0.226	729
5-n-Propylhydantoin	1.02	43.05	XIC(43.05Â±500ppm)	10920244	728	364	36.336 min, 4.630 s	0.148	721
1H-3a,7-Methanoazulene, octahydro-1,4,9,9-tetramethyl-, (1a,3aa,4ÃŸ,7a,8aÃŸ)-	0.62	81.07	XIC(81.07Â±500ppm)	1240889	126	210	36.5026 min, 2.695 s	0.135	713
1-(4-methylphenyl)-3-(2-furyl)propane	0.67	81.07	XIC(81.07Â±500ppm)	933096	159	97	36.5026 min, 3.124 s	0.119	705
Pentadecane, 7-methyl-	1.9	57.09	XIC(57.09Â±500ppm)	148492575	3614	10345	36.586 min, 1.858 s	0.073	893
cis-2,4-Dimethylthiane, S,S-dioxide	3.03	55.08	XIC(55.08Â±500ppm)	48504392	701	2181	36.586 min, 1.991 s	0.383	736
1-Methyl-4-(1-methylethyl)-cyclohexane	0.26	97.1	XIC(97.10Â±500ppm)	3544052	311	705	36.7527 min, 2.428 s	0.094	732
1H-Cycloprop[e]azulene, decahydro-1,1,4,7-tetramethyl-	0.5	81.08	XIC(81.08Â±500ppm)	2587771	116	276	36.836 min, 2.733 s	0.144	785
Cyclohexane, 1,1'-(1,3-propanediyl)bis-	0.59	55.07	XIC(55.07Â±500ppm)	5335467	262	405	36.9193 min, 2.416 s	0.132	718
Naphthalene, 2,3,6-trimethyl-	1.15	170.12	XIC(170.12Â±500ppm)	4614967	834	1395	36.9193 min, 3.701 s	0.12	879
2H-1-Benzopyran-2-one, 8-hydroxy-	1.11	134.05	XIC(134.05Â±500ppm)	7034836	1489	1341	36.9193 min, 5.238 s	0.165	904
Pentadecane, 4-methyl-	1.25	43.07	XIC(43.07Â±500ppm)	27797773	2213	2213	37.0027 min, 1.864 s	0.069	889
Vanillic acid	1.19	168.05	XIC(168.05Â±500ppm)	1798222	330	613	37.086 min, 4.136 s	0.134	825
3-(4-Hydroxyphenyl)propionitrile	1.13	107.05	XIC(107.05Â±500ppm)	4398991	1372	785	37.1694 min, 5.077 s	0.162	882
Ethanone, 1-(3,4-dimethoxyphenyl)-	1.09	165.06	XIC(165.06Â±500ppm)	1832712	218	464	37.2527 min, 4.407 s	0.139	852
2,6-Dimethoxybenzoquinone	1.04	69.02	XIC(69.02Â±500ppm)	40782488	1578	2949	37.2527 min, 5.852 s	0.165	925
5-Methyl-1-phenyloctane	1.19	92.06	XIC(92.06Â±500ppm)	1105674	211	240	37.4194 min, 2.494 s	0.081	719
3,4-Altrosan	1.07	43.04	XIC(43.04Â±500ppm)	23592107	765	861	37.4194 min, 4.701 s	0.17	709
Muco-Inositol	2.92	73.05	XIC(73.05Â±500ppm)	1375740	155	410	37.5027 min, 6.073 s	0.045	719
9-Eicosyne	1.22	55.07	XIC(55.07Â±500ppm)	12882594	344	577	37.5861 min, 2.258 s	0.336	744
Fluorene	1.06	166.08	XIC(166.08Â±500ppm)	2006781	500	664	37.5861 min, 4.271 s	0.128	799
4-(1-Hydroxyallyl)-2-methoxyphenol	1.12	137.07	XIC(137.07Â±500ppm)	7201280	1681	1314	37.5861 min, 4.351 s	0.14	911
5-Methyl-2H-isoindole-1,3-dione	1.22	161.06	XIC(161.06Â±500ppm)	1390504	746	402	37.5861 min, 4.977 s	0.161	850
Cyclododecanemethanol	1.2	69.08	XIC(69.08Â±500ppm)	24000995	324	1941	37.6694 min, 2.084 s	0.087	736
1-Propanone, 1-(4-hydroxy-3-methoxyphenyl)-	1.4	151.05	XIC(151.05Â±500ppm)	10705152	659	1941	37.8361 min, 4.174 s	0.149	747
1H,2H,3H-Cyclopenta[a]naphthalen-5-ylmethane	1.05	182.11	XIC(182.11Â±500ppm)	565501	314	327	37.9194 min, 3.545 s	0.112	828
Phenol, 2-methoxy-4-(1-propenyl)-, (Z)-	1.13	164.09	XIC(164.09Â±500ppm)	2565619	481	652	37.9194 min, 3.883 s	0.124	755
4,4'-Dimethylbiphenyl	1.11	182.12	XIC(182.12Â±500ppm)	1735208	599	939	38.0861 min, 3.539 s	0.113	853
1,6:2,3-Dianhydro-4-O-acetyl-ÃŸ-d-gulopyranose	1.1	43.04	XIC(43.04Â±500ppm)	68930375	1272	1646	38.0861 min, 4.756 s	0.154	702
Acetic acid, hexyl ester	0.91	43.04	XIC(43.04Â±500ppm)	1675627	125	105	38.4195 min, 5.470 s	0.157	702
Furan, 2-(dichloromethyl)-tetrahydro-	2.19	71.05	XIC(71.05Â±500ppm)	337610717	2604	13477	38.5028 min, 2.433 s	0.17	800
Bicyclo[7.2.0]undec-4-ene, 4,11,11-trimethyl-8-methylene-	0.53	41.06	XIC(41.06Â±500ppm)	254307	108	11	38.5861 min, 3.158 s	0.157	704
Benzene, 1-methyl-3-[(4-methylphenyl)methyl]-	1.51	181.11	XIC(181.11Â±500ppm)	260531	111	116	38.5861 min, 3.355 s	0.109	741
Cyclohexane, 1-ethyl-1,3-dimethyl-, trans-	1.2	69.08	XIC(69.08Â±500ppm)	6352819	308	876	38.6695 min, 2.101 s	0.088	721
4-Hydroxy-1-indanone	1.13	91.06	XIC(91.06Â±500ppm)	4178925	832	256	38.6695 min, 5.117 s	0.165	851
9-Iodotricyclo[4.2.1.1(2,5)]decane	0.46	135.12	XIC(135.12Â±500ppm)	867197	127	232	38.7528 min, 2.887 s	0.096	724
Phenol, 2,6-dimethoxy-4-(2-propenyl)-	1.13	194.11	XIC(194.11Â±500ppm)	7085618	1139	2080	38.7528 min, 3.775 s	0.123	900
Benzaldehyde, 3,4,5-trimethoxy-	1.23	196.08	XIC(196.08Â±500ppm)	1466029	547	709	38.7528 min, 4.318 s	0.146	821
Sulfurous acid, butyl cyclohexylmethyl ester	0.46	97.1	XIC(97.10Â±500ppm)	18579452	649	2562	38.9195 min, 2.099 s	0.073	811
Naphthalene, 2,3,4,4a,5,6-hexahydro-1,4a-dimethyl-7-(1-methylethyl)-	1.15	161.11	XIC(161.11Â±500ppm)	32317902	2494	4715	38.9195 min, 3.584 s	0.125	775
1-Naphthalenol, 2-methyl-	1.01	158.08	XIC(158.08Â±500ppm)	2315801	401	668	38.9195 min, 4.386 s	0.142	873
3,4,5-Trimethoxyphenol	1.23	169.06	XIC(169.06Â±500ppm)	3923446	841	890	39.0028 min, 4.418 s	0.146	859
Methane, di-p-tolyl-	1.1	181.11	XIC(181.11Â±500ppm)	1026546	434	464	39.2529 min, 3.579 s	0.125	816
1H-Inden-1-one, 2,3-dihydro-7-hydroxy-3-methyl-	1.12	147.05	XIC(147.05Â±500ppm)	1284715	172	419	39.3362 min, 4.671 s	0.138	785
6-Hydroxy-4-methylcoumarin	1.07	176.06	XIC(176.06Â±500ppm)	2435417	295	776	39.6696 min, 4.769 s	0.144	830
Benzaldehyde, 2-hydroxy-3-(2-propenyl)-	1.19	162.08	XIC(162.08Â±500ppm)	2714330	587	718	39.7529 min, 4.935 s	0.161	818
1,3-Benzenediol, O-(4-butylbenzoyl)-O'-(4-fluorobenzoyl)-	1.17	161.14	XIC(161.14Â±500ppm)	2703429	1173	1092	39.8362 min, 2.309 s	0.087	744
Oxalic acid, butyl cyclohexylmethyl ester	0.32	97.1	XIC(97.10Â±500ppm)	4339631	334	1192	39.9196 min, 2.134 s	0.073	782
Cyclohexadecane	2.68	55.07	XIC(55.07Â±500ppm)	8232567	678	540	40.0029 min, 1.994 s	0.174	778
Idosan triacetate	1.5	43.04	XIC(43.04Â±500ppm)	20603039	1228	742	40.2529 min, 4.055 s	0.152	782
Cyclopentaneethanol, ÃŸ,2,3-trimethyl-	2.4	55.08	XIC(55.08Â±500ppm)	2334708	145	286	40.3363 min, 2.003 s	0.124	729
Benzenepropanol, 4-hydroxy-3-methoxy-	1.13	137.07	XIC(137.07Â±500ppm)	14937820	1340	2292	40.3363 min, 4.176 s	0.13	887
Eicosyl heptyl ether	0.86	57.09	XIC(57.09Â±500ppm)	4871627	229	604	40.4196 min, 1.963 s	0.079	810
1(2H)-Acenaphthylenone	1.22	140.07	XIC(140.07Â±500ppm)	857362	337	330	40.4196 min, 5.132 s	0.166	793
2-Naphthalenol, 3-methoxy-	1.52	131.06	XIC(131.06Â±500ppm)	1091625	310	221	40.6696 min, 4.556 s	0.152	831
Tridecanoic acid	0.2	43.07	XIC(43.07Â±500ppm)	728460	166	58	40.8363 min, 2.367 s	0.087	776
1,3-Dioxolane, 2-propyl-	2.42	73.05	XIC(73.05Â±500ppm)	1205044	139	436	41.0863 min, 6.060 s	0.044	716
(E)-4-(3-Hydroxyprop-1-en-1-yl)-2-methoxyphenol	0.46	137.07	XIC(137.07Â±500ppm)	809277	147	250	41.1697 min, 4.325 s	0.127	735
1,3-di-iso-propylnaphthalene	1.09	197.14	XIC(197.14Â±500ppm)	952866	564	345	41.3364 min, 3.061 s	0.103	786
1H-Inden-1-one, 5-(1,1-dimethylethyl)-2,3-dihydro-3,3-dimethyl-	1.23	201.1	XIC(201.10Â±500ppm)	3695142	811	1185	41.3364 min, 3.408 s	0.118	717
2-Allyl-1,4-dimethoxy-3-methyl-benzene	1.17	192.09	XIC(192.09Â±500ppm)	2805651	801	698	41.3364 min, 4.334 s	0.143	712
n-Tridecan-1-ol	0.16	43.07	XIC(43.07Â±500ppm)	2368834	184	145	41.4197 min, 2.298 s	0.071	910
Methyl 3-(4-hydroxy-3-methoxyphenyl)propanoate	1.06	137.07	XIC(137.07Â±500ppm)	3105415	316	640	41.503 min, 3.922 s	0.122	840
Ethanone, 1-(3,4,5-trimethoxyphenyl)-	1.29	195.08	XIC(195.08Â±500ppm)	1562055	809	535	41.5864 min, 4.117 s	0.139	829
9H-Fluorene, 2-methyl-	1.56	165.08	XIC(165.08Â±500ppm)	675555	178	214	41.8364 min, 3.992 s	0.133	814
Cycloisolongifolene, 8,9-dehydro-9-vinyl-	1.07	199.16	XIC(199.16Â±500ppm)	8793902	1937	3783	41.9197 min, 2.952 s	0.108	706
9H-Fluorene, 9-methyl-	1.14	165.08	XIC(165.08Â±500ppm)	684804	180	172	41.9197 min, 4.047 s	0.135	857
2H-1-Benzopyran-2-one, 8-methoxy-	1.37	176.05	XIC(176.05Â±500ppm)	950423	289	270	41.9197 min, 5.343 s	0.182	762
9H-Fluorene, 4-methyl-	0.98	165.08	XIC(165.08Â±500ppm)	585256	135	218	42.1698 min, 4.099 s	0.115	723
Oleyl alcohol, chlorodifluoroacetate	0.44	97.1	XIC(97.10Â±500ppm)	8330400	727	1492	42.2531 min, 2.023 s	0.085	727
3-Hydroxybiphenyl	1.15	170.08	XIC(170.08Â±500ppm)	1554082	927	579	42.2531 min, 4.361 s	0.133	806
1,4-diazabicyclo[4.3.0]nonan-2,5-dione, 3-methyl	0.63	70.08	XIC(70.08Â±500ppm)	6418073	512	735	42.2531 min, 6.345 s	0.21	878
Homosyringaldehyde	1.06	167.08	XIC(167.08Â±500ppm)	3984966	725	1115	42.4198 min, 4.507 s	0.139	841
Hexane, 3,4-bis(1,1-dimethylethyl)-2,2,5,5-tetramethyl-	2.61	57.09	XIC(57.09Â±500ppm)	5606821	300	838	42.5865 min, 1.794 s	0.186	811
p-Hydroxybiphenyl	1.13	170.08	XIC(170.08Â±500ppm)	1775486	392	524	42.5865 min, 4.430 s	0.135	777
Benzene, (1-hexylheptyl)-	0.72	91.06	XIC(91.06Â±500ppm)	810857	153	96	42.6698 min, 2.327 s	0.088	719
Benzofuran, 3-methyl-2-(1-methylethenyl)-	1.22	172.1	XIC(172.10Â±500ppm)	1518780	202	464	42.6698 min, 4.156 s	0.137	719
Phenol, 2-(1-phenylethyl)-	1.16	183.09	XIC(183.09Â±500ppm)	401113	113	201	42.9198 min, 4.070 s	0.119	820
3,4,5-trimethoxyphenyl-2-propanone	1.16	181.1	XIC(181.10Â±500ppm)	1732955	355	602	43.0032 min, 4.053 s	0.135	762
Benzoic acid, 3,4,5-trimethoxy-, methyl ester	1.28	226.1	XIC(226.10Â±500ppm)	339151	149	346	43.0865 min, 3.902 s	0.119	722
Ethanone, 1-(4-ethoxyphenyl)-	1.58	121.03	XIC(121.03Â±500ppm)	1170721	304	337	43.0865 min, 4.700 s	0.157	738
Methyl tetradecanoate	1.22	74.04	XIC(74.04Â±500ppm)	708728	227	190	43.1698 min, 2.231 s	0.066	852
Benzo[c]cinnoline	1.38	152.07	XIC(152.07Â±500ppm)	2072248	429	553	43.2532 min, 4.751 s	0.158	860
(5S,8R,8aS)-5-Allyl-8-butyloctahydroindolizine	1.09	180.05	XIC(180.05Â±500ppm)	4735412	302	900	43.2532 min, 4.767 s	0.06	804
Pyrrolo[1,2-a]pyrazine-1,4-dione, hexahydro-	2.35	44.01	XIC(44.01Â±500ppm)	1764148	207	43	43.9199 min, 2.007 s	0.246	751
2-Dibenzofuranol	1.08	184.06	XIC(184.06Â±500ppm)	1476884	430	717	44.1699 min, 4.455 s	0.134	823
6-Methoxy-4-methylcoumarin	1.64	190.07	XIC(190.07Â±500ppm)	587560	228	255	44.2533 min, 4.739 s	0.163	727
1,1'-Biphenyl, 2,6-dichloro-	1.1	222.01	XIC(222.01Â±500ppm)	366578	144	400	44.3366 min, 3.730 s	0.102	803
3-Phenylpropionic acid, 4-cyanophenyl ester	1.01	91.06	XIC(91.06Â±500ppm)	2094507	227	239	44.4199 min, 2.376 s	0.078	759
2,4-Dimethyl-1-hexene	1.02	56.08	XIC(56.08Â±500ppm)	1227861	151	181	44.5866 min, 1.904 s	0.06	766
Naphthalene, 2,3-dimethoxy-	1.18	188.09	XIC(188.09Â±500ppm)	752062	321	331	44.5866 min, 4.173 s	0.13	701
o-Toluic acid, tridec-2-ynyl ester	0.78	119.09	XIC(119.09Â±500ppm)	9180876	1344	1732	44.67 min, 2.343 s	0.138	782
3-Allyl-6-methoxyphenol	1.1	137.07	XIC(137.07Â±500ppm)	1197733	319	268	44.7533 min, 3.629 s	0.114	705
Syringylacetone	1.07	167.08	XIC(167.08Â±500ppm)	186229601	4503	10191	44.7533 min, 4.326 s	0.147	858
Benzoic acid, 4-hydroxy-3,5-dimethoxy-, hydrazide	1.17	181.06	XIC(181.06Â±500ppm)	12350806	910	2325	44.8366 min, 4.199 s	0.13	820
Benzene, 1,1'-(3-methyl-1-propene-1,3-diyl)bis-	1.28	115.06	XIC(115.06Â±500ppm)	1097984	124	146	44.92 min, 3.440 s	0.106	805
9H-Fluorene, 9-methylene-	1.14	178.09	XIC(178.08Â±500ppm)	3855124	1382	1131	45.0033 min, 4.554 s	0.147	924
3,5-Dimethoxy-4-hydroxybenzeneethanol	0.55	167.08	XIC(167.08Â±500ppm)	2893695	234	592	45.0867 min, 4.343 s	0.13	782
3-Hexanol, 2,3-dimethyl-	1.08	43.04	XIC(43.04Â±500ppm)	4510887	317	238	45.2533 min, 4.945 s	0.144	705
5-Undecene, 3-methyl-, (E)-	1	70.09	XIC(70.09Â±500ppm)	1903045	315	373	45.3367 min, 1.905 s	0.059	711
Cyclo(L-prolyl-L-valine)	1.12	70.08	XIC(70.08Â±500ppm)	5250846	777	573	45.9201 min, 5.178 s	0.166	899
Benzen, 2-acetate-1,3-dimethoxy-5-(1-propenyl)-	1.3	194.11	XIC(194.11Â±500ppm)	2073393	503	851	46.1701 min, 3.711 s	0.128	779
4-Acetyl-2,6-dimethoxyphenyl acetate	1.3	181.06	XIC(181.06Â±500ppm)	3123623	198	898	46.1701 min, 4.187 s	0.155	788
Benzoic acid, 4-hydroxy-3,5-dimethoxy-	1.04	198.06	XIC(198.06Â±500ppm)	550820	134	232	46.1701 min, 4.299 s	0.135	718
Anthrone	1.36	194.08	XIC(194.08Â±500ppm)	420499	155	232	46.1701 min, 4.376 s	0.145	833
Bis(3-chloro-1-propyl)(1-chloro-2-propyl)phosphate	2.03	41.06	XIC(41.06Â±500ppm)	3826790	262	187	46.3368 min, 3.313 s	0.164	746
trans-Sinapyl alcohol	1.11	167.08	XIC(167.08Â±500ppm)	9086717	735	1587	46.3368 min, 4.283 s	0.132	767
1-Propanone, 1-(4-hydroxy-3,5-dimethoxyphenyl)-	1.24	181.06	XIC(181.06Â±500ppm)	59573861	5854	5241	46.5868 min, 4.060 s	0.156	851
Urea, N,N'-dimethyl-N,N'-diphenyl-	1.81	134.07	XIC(134.07Â±500ppm)	1284929	465	362	46.7535 min, 4.088 s	0.145	758
9H-Carbazole-9-methanol	1.17	167.08	XIC(167.08Â±500ppm)	13255892	2801	2156	46.7535 min, 4.979 s	0.153	922
Phytol	1.93	55.08	XIC(55.08Â±500ppm)	1232920	151	143	47.0868 min, 1.897 s	0.062	856
Caffeine	0.55	44.01	XIC(44.01Â±500ppm)	671459	278	26	47.0868 min, 5.249 s	0.168	783
9-Methyl-S-octahydrophenanthrene	1.03	185.14	XIC(185.14Â±500ppm)	276967	113	94	47.3368 min, 3.572 s	0.118	827
4-Hydroxy-9-fluorenone	1.59	196.06	XIC(196.06Â±500ppm)	964441	257	305	47.4202 min, 4.680 s	0.15	752
1H-Indene, 1-(phenylmethylene)-	1.23	204.1	XIC(204.10Â±500ppm)	620395	193	337	47.5035 min, 4.173 s	0.131	910
2-Propenal, 3-[4-(acetyloxy)-3-methoxyphenyl]-	1.79	43.04	XIC(43.04Â±500ppm)	2721831	575	211	47.5869 min, 4.219 s	0.133	869
Dodecylcyclohexane	0.85	83.09	XIC(83.09Â±500ppm)	1750814	385	485	47.8369 min, 2.021 s	0.065	780
Allylescaline	1.04	167.08	XIC(167.08Â±500ppm)	1934997	524	715	47.8369 min, 3.996 s	0.127	724
Phthalic acid, 2-chloropropyl hexyl ester	0.57	149.03	XIC(149.03Â±500ppm)	1482099	117	362	48.0869 min, 3.225 s	0.079	767
Pentadecane, 2-methyl-2-phenyl-	0.66	119.09	XIC(119.09Â±500ppm)	3238346	301	785	48.1702 min, 2.285 s	0.076	827
[1,1'-Biphenyl]-4,4'-diol	1.38	157.07	XIC(157.07Â±500ppm)	467630	210	163	48.4203 min, 5.476 s	0.162	728
2-Hydroxyfluorene	1.58	182.08	XIC(182.08Â±500ppm)	649553	142	254	48.5036 min, 4.534 s	0.124	772
Phenanthrene, 4-methyl-	1.39	192.1	XIC(192.10Â±500ppm)	2567994	560	882	48.5869 min, 4.171 s	0.136	896
1H-Phenalen-1-one	1.18	152.07	XIC(152.07Â±500ppm)	2595330	808	685	48.6703 min, 5.434 s	0.17	879
Anthracene, 1-methyl-	1.3	192.1	XIC(192.10Â±500ppm)	3737542	601	1057	48.7536 min, 4.228 s	0.135	891
5-(3-Hydroxypropyl)-2,3-dimethoxyphenol	1.09	168.09	XIC(168.09Â±500ppm)	6868566	1095	1602	48.837 min, 4.061 s	0.122	848
Anthracene, 2-methyl-	1.21	192.1	XIC(192.10Â±500ppm)	1041912	273	453	49.0036 min, 4.189 s	0.127	833
Pyrrolo[1,2-a]pyrazine-1,4-dione, hexahydro-3-(2-methylpropyl)-	1.04	70.08	XIC(70.08Â±500ppm)	2645071	432	493	49.1703 min, 4.733 s	0.145	770
5-Nonadecen-1-ol	1.07	81.04	XIC(81.04Â±500ppm)	1235993	285	300	49.2537 min, 2.124 s	0.063	778
4aH-carbazole, 6-methyl-	1.18	181.1	XIC(181.10Â±500ppm)	2085092	425	745	49.2537 min, 4.527 s	0.14	780
Benzoic acid, 4-(4-ethylcyclohexyl)-, 4-butoxy-2,3-dicyanophenyl ester	1.17	215.19	XIC(215.19Â±500ppm)	593755	241	358	49.337 min, 2.680 s	0.097	741
Butylsyringone	1.16	181.06	XIC(181.06Â±500ppm)	702103	248	242	49.337 min, 3.734 s	0.115	754
Phenanthrene, 2-methyl-	1.21	192.1	XIC(192.10Â±500ppm)	2462547	893	815	49.5037 min, 4.344 s	0.141	879
3-methoxy-4-hydroxy-methyl-nitrostyrene	2.58	41.04	XIC(41.04Â±500ppm)	713741	134	53	49.6704 min, 4.062 s	0.123	794
Norharmane, N-methyl-	1.47	182.09	XIC(182.09Â±500ppm)	1770868	417	423	49.7537 min, 5.053 s	0.164	819
Androstan-17-one, 3-ethyl-3-hydroxy-, (5a)-	1.23	190.18	XIC(190.18Â±500ppm)	615004	130	280	49.837 min, 2.594 s	0.091	734
Oxacycloheptadecan-2-one	1.23	55.07	XIC(55.07Â±500ppm)	700473	118	87	50.0037 min, 2.893 s	0.099	851
5,10-Diethoxy-2,3,7,8-tetrahydro-1H,6H-dipyrrolo[1,2-a:1',2'-d]pyrazine	1.55	70.08	XIC(70.08Â±500ppm)	29548005	1014	2588	50.0037 min, 5.806 s	0.163	837
9H-Carbazole, 2-methyl-	1.08	181.1	XIC(181.10Â±500ppm)	1061837	289	333	50.2537 min, 4.590 s	0.135	783
Hexadecenoic acid, Z-11-	1.11	55.07	XIC(55.07Â±500ppm)	1659656	163	131	50.3371 min, 2.307 s	0.072	879
9H-Carbazole, 9-methyl-	1.12	181.1	XIC(181.10Â±500ppm)	1362743	461	450	50.4204 min, 4.573 s	0.143	899
Benzoic acid, 4-(4-butylcyclohexyl)-, 2,3-dicyano-4-(pentyloxy)phenyl ester	1.04	243.22	XIC(243.22Â±500ppm)	1453916	335	1199	50.5871 min, 2.638 s	0.088	771
Androstane, (5ÃŸ)-	1.3	123.12	XIC(123.12Â±500ppm)	1736292	398	369	50.6704 min, 2.561 s	0.084	738
9,10-Phenanthrenedione	1.17	180.07	XIC(180.07Â±500ppm)	1067117	150	268	50.9205 min, 4.860 s	0.141	826
Benzothiazole, 2-phenyl-	1.66	211.05	XIC(211.05Â±500ppm)	743307	327	283	51.2538 min, 4.370 s	0.137	769
Cyclopropane, 1-methyl-1-(2-methylpropyl)-2-nonyl-	0.89	69.08	XIC(69.08Â±500ppm)	1168178	158	173	51.3372 min, 1.849 s	0.059	842
trans-Sinapaldehyde	1.07	208.08	XIC(208.08Â±500ppm)	35528023	2191	3691	51.5872 min, 4.204 s	0.135	869
Ethanone, 1-[2,3-dihydro-1,1,2,6-tetramethyl-3-(1-methylethyl)-1H-inden-5-yl]-	1.15	215.19	XIC(215.19Â±500ppm)	9001086	767	2727	51.6705 min, 2.616 s	0.085	752
Phthalic acid, di(2-methylbutyl) ester	1.19	149.03	XIC(149.03Â±500ppm)	1879329	367	381	52.0039 min, 2.827 s	0.099	788
Diamyl phthalate	1.19	149.03	XIC(149.03Â±500ppm)	13616803	2044	2632	52.4206 min, 2.791 s	0.096	808
Phenanthrene, 1,7-dimethyl-	1.46	206.12	XIC(206.12Â±500ppm)	597176	215	287	52.4206 min, 3.883 s	0.118	785
1-Hexadecanol, acetate	1.03	43.06	XIC(43.06Â±500ppm)	5953317	776	476	52.5873 min, 2.031 s	0.064	932
Naphthalic anhydride	1.24	154.06	XIC(154.06Â±500ppm)	819185	335	217	52.9206 min, 5.504 s	0.175	903
Phenanthrene, 3,6-dimethyl-	1.42	206.12	XIC(206.12Â±500ppm)	1586888	390	563	53.004 min, 3.949 s	0.133	820
9,10-Bis(bromomethyl)anthracene	1.14	204.1	XIC(204.10Â±500ppm)	487051	119	221	53.004 min, 4.200 s	0.12	774
Heptadecanoic acid, methyl ester	0.96	74.04	XIC(74.04Â±500ppm)	556063	203	182	53.0873 min, 2.057 s	0.062	792
Cyclopenta(def)phenanthrenone	1.33	204.07	XIC(204.07Â±500ppm)	761842	386	272	53.254 min, 4.772 s	0.16	874
3,5-Dimethoxy-4-hydroxycinnamaldehyde	1.2	208.08	XIC(208.08Â±500ppm)	3153094	339	808	53.5873 min, 3.987 s	0.116	832
Fluoranthene	1.55	202.08	XIC(202.08Â±500ppm)	26423371	3059	2870	53.6707 min, 4.515 s	0.149	955
Benzene, 1,3,5-triethenyl-2,4,6-triethyl-	1.2	225.17	XIC(225.17Â±500ppm)	538435	315	329	53.9207 min, 3.089 s	0.093	745
Naphthalene, 1-butyl-1,2,3,4-tetrahydro-4-pentyl-	1.25	201.17	XIC(201.17Â±500ppm)	2262684	593	877	54.004 min, 2.600 s	0.082	722
Carbazole, 1,3-dimethyl-	1.19	195.11	XIC(195.11Â±500ppm)	430408	113	148	54.004 min, 4.297 s	0.123	701
Phthalic acid, hex-3-yl isobutyl ester	1.15	149.03	XIC(149.03Â±500ppm)	3403439	962	910	54.3374 min, 3.244 s	0.103	787
1,1'-Biphenyl, 5-hydroxy-3,4'-dimethoxy-	1.08	230.11	XIC(230.11Â±500ppm)	2320531	877	1212	54.4207 min, 3.969 s	0.121	713
Allyl undecanoate	0.54	41.06	XIC(41.06Â±500ppm)	784009	103	67	54.6708 min, 2.041 s	0.074	773
2-(Pentyloxycarbonyl)benzoic acid	1.14	149.03	XIC(149.03Â±500ppm)	1739038	425	707	55.0875 min, 2.670 s	0.086	772
10,18-Bisnorabieta-5,7,9(10),11,13-pentaene	1.1	223.15	XIC(223.15Â±500ppm)	2372990	949	983	55.0875 min, 3.213 s	0.101	839
9,12-Octadecadienoic acid, methyl ester	1.07	67.07	XIC(67.07Â±500ppm)	1982278	258	300	55.1708 min, 2.208 s	0.069	891
Pyrene	1.39	202.08	XIC(202.08Â±500ppm)	23811786	2894	2932	55.2541 min, 4.712 s	0.153	938
2-Nonanone	1.46	43.05	XIC(43.05Â±500ppm)	679591	247	85	55.4208 min, 2.066 s	0.064	790
Cyclohexane, hexaethylidene-	1.15	240.2	XIC(240.20Â±500ppm)	1396096	623	970	55.5042 min, 3.140 s	0.096	742
Benzo[b]naphtho[2,3-d]furan	1.68	218.08	XIC(218.08Â±500ppm)	3975261	1017	1037	55.5042 min, 4.191 s	0.144	904
Cyclopentene	3.36	67.06	XIC(67.06Â±500ppm)	2821766	231	370	55.8375 min, 3.254 s	0.135	732
3-Phenanthrol	1.14	194.08	XIC(194.08Â±500ppm)	680090	311	287	56.1709 min, 4.766 s	0.177	735
9,12,15-Octadecatrienoic acid, (Z,Z,Z)-	0.3	79.06	XIC(79.06Â±500ppm)	927290	206	155	56.4209 min, 2.391 s	0.068	882
Phthalic acid, cyclohexyl 2-pentyl ester	1.06	149.03	XIC(149.03Â±500ppm)	1435089	652	576	56.5042 min, 3.088 s	0.1	771
(Z)-18-Octadec-9-enolide	1.12	55.07	XIC(55.07Â±500ppm)	2264329	444	191	56.5876 min, 2.790 s	0.093	880
Cyclohexane, ethenyl-	2.99	67.07	XIC(67.07Â±500ppm)	1160549	141	181	56.6709 min, 2.174 s	0.116	710
s-Indacen-1(2H)-one, 3,5,6,7-tetrahydro-3,3,4,5,5,8-hexamethyl-	1.14	241.2	XIC(241.20Â±500ppm)	1765828	684	859	56.9209 min, 2.965 s	0.096	770
3,4,5-Trimethoxy-B-Nitrostyrene	2.65	41.04	XIC(41.04Â±500ppm)	7169132	579	326	56.9209 min, 3.839 s	0.161	761
1-Methyl-10,18-bisnorabieta-8,11,13-triene	1.17	241.2	XIC(241.20Â±500ppm)	2676750	716	697	57.171 min, 2.938 s	0.092	764
Anthracene, 9-butyl-1,2,3,4-tetrahydro-	1.28	238.18	XIC(238.18Â±500ppm)	14289551	1680	3657	57.171 min, 3.300 s	0.105	772
9,12,15-Octadecatrienoic acid, ethyl ester, (Z,Z,Z)-	1	79.06	XIC(79.06Â±500ppm)	1171214	243	219	57.3376 min, 2.213 s	0.065	884
Pyrene, 1-methyl-	1.54	216.1	XIC(216.10Â±500ppm)	1213001	367	476	57.3376 min, 4.139 s	0.142	922
p-Aminotoluene	1.18	107.08	XIC(107.08Â±500ppm)	1080820	273	262	57.421 min, 3.143 s	0.097	719
(Z)6,(Z)9-Pentadecadien-1-ol	0.35	43.05	XIC(43.05Â±500ppm)	585615	124	79	57.5877 min, 2.135 s	0.063	834
9,12-Octadecadien-1-ol, (Z,Z)-	3.69	67.07	XIC(67.07Â±500ppm)	931357	245	159	57.7543 min, 2.050 s	0.072	738
11-cis-Vaccenyl acetate	0.65	43.05	XIC(43.05Â±500ppm)	5012406	550	359	57.921 min, 2.048 s	0.062	893
Butyl citrate	1.14	129.03	XIC(129.03Â±500ppm)	951669	245	270	58.0044 min, 2.452 s	0.077	809
Benzene, pentadecyl-	1.14	92.06	XIC(92.06Â±500ppm)	670538	252	197	58.0877 min, 2.123 s	0.065	872
7H-Benzo[c]fluorene	1.33	216.1	XIC(216.10Â±500ppm)	3197161	505	949	58.0877 min, 4.279 s	0.161	925
1,13-Tetradecadiene	0.4	43.05	XIC(43.05Â±500ppm)	1316396	189	135	58.2544 min, 2.037 s	0.062	864
6,7-Dimethoxy-4-ethylcoumarin	1.26	234.1	XIC(234.10Â±500ppm)	728288	304	366	58.3377 min, 4.474 s	0.132	716
Retene	0.88	44.01	XIC(44.01Â±500ppm)	1481894	173	28	58.4211 min, 3.497 s	0.105	733
1-Acetoxynonadecane	1.13	43.06	XIC(43.06Â±500ppm)	101113674	6525	3281	58.5044 min, 1.951 s	0.071	935
1-Phenyldibenzofuran	1.29	244.1	XIC(244.10Â±500ppm)	3539816	1147	1576	58.5044 min, 4.087 s	0.13	825
Phenanthrene, 2,3,5-trimethyl-	1.28	220.13	XIC(220.13Â±500ppm)	595004	200	315	58.8378 min, 3.921 s	0.119	821
Pyrene, 2-methyl-	1.25	216.1	XIC(216.10Â±500ppm)	2279254	522	769	59.4211 min, 4.459 s	0.15	902
Hexadecanoic acid, 2-hydroxy-1-(hydroxymethyl)ethyl ester	1.12	43.06	XIC(43.06Â±500ppm)	1258561	591	131	59.6712 min, 2.201 s	0.064	773
1-Methoxy-2,3-cis-dimethylaziridine (sin)	1.96	70.04	XIC(70.04Â±500ppm)	761638	135	321	60.5046 min, 5.983 s	0.042	766
Glycidyl palmitate	1.15	57.07	XIC(57.07Â±500ppm)	250338	101	49	60.9213 min, 2.201 s	0.068	773
Oleyl alcohol, trifluoroacetate	2.71	55.07	XIC(55.07Â±500ppm)	1829559	151	198	61.1713 min, 1.752 s	0.114	724
9-Octadecenal	1.99	55.07	XIC(55.07Â±500ppm)	2879192	650	238	61.338 min, 2.427 s	0.081	752
Pyrrolo[1,2-a]pyrazine-1,4-dione, hexahydro-3-(phenylmethyl)-	1.07	125.08	XIC(125.08Â±500ppm)	1148607	332	488	61.4213 min, 5.180 s	0.15	840
Podocarpa-8,11,13-triene-7ÃŸ,13-diol, 14-isopropyl-	1.1	202.14	XIC(202.14Â±500ppm)	3261756	1078	989	61.5046 min, 3.177 s	0.1	841
2-Propanone, 1-hydroxy-3-(4-hydroxy-3-methoxyphenyl)-	1.05	137.07	XIC(137.07Â±500ppm)	13602618	1961	4041	61.588 min, 3.851 s	0.115	790
Ferruginol	1.01	69.08	XIC(69.08Â±500ppm)	635816	402	90	61.6713 min, 3.113 s	0.097	854
Eicosanoic acid, methyl ester	1.08	74.04	XIC(74.04Â±500ppm)	1665831	699	476	61.838 min, 1.930 s	0.058	878
13-Octadecenal, (Z)-	1.18	55.07	XIC(55.07Â±500ppm)	740159	139	108	61.838 min, 2.226 s	0.066	842
Cyclobutanecarboxylic acid, undec-2-enyl ester	1.04	83.04	XIC(83.04Â±500ppm)	1412952	422	469	62.2547 min, 2.388 s	0.068	739
phenol, 4,4'-[dithiobis(methylene)]bis[2-methoxy-	0.99	137.07	XIC(137.07Â±500ppm)	4477274	933	1990	62.2547 min, 3.795 s	0.111	761
17-Methoxy-4-methyl-d-homo-18-norandrosta-4,8,13,15,17-pentaen-3-one	0.97	293.21	XIC(293.21Â±500ppm)	346368	239	571	62.338 min, 2.596 s	0.077	703
Decanamide, N,N-diethyl-	0.83	115.1	XIC(115.10Â±500ppm)	494436	111	138	62.5047 min, 2.156 s	0.067	741
2-Acetoxytetradecane	1.2	43.06	XIC(43.06Â±500ppm)	633683	157	76	62.5881 min, 2.103 s	0.065	707
N-[4,6-Dimethoxynaphth-2-ylmethyl]-3,5-dichloro-4-hydroxyphenamine	1.14	201.14	XIC(201.14Â±500ppm)	1342995	605	564	62.6714 min, 2.738 s	0.089	722
Eicosanoic acid	0.16	43.07	XIC(43.07Â±500ppm)	481564	155	64	62.7547 min, 2.008 s	0.062	795
Octadecane, 1-iodo-	2.36	57.09	XIC(57.09Â±500ppm)	2207379	166	379	62.9214 min, 1.677 s	0.111	754
Benzo[ghi]fluoranthene	1.31	226.09	XIC(226.09Â±500ppm)	2072777	509	597	63.0048 min, 4.525 s	0.143	891
9-Octadecen-1-ol, acetate, (Z)-	0.99	82.08	XIC(82.08Â±500ppm)	637723	125	204	63.5048 min, 1.958 s	0.072	720
9-Tetradecen-1-ol, acetate, (E)-	0.9	55.07	XIC(55.07Â±500ppm)	3175819	183	319	63.7548 min, 1.961 s	0.057	796
Carda-5,20(22)-dienolide, 3-[(6-deoxy-a-L-mannopyranosyl)oxy]-14-hydroxy-, (3ÃŸ)-	1.05	57.09	XIC(57.09Â±500ppm)	2570064	532	126	63.7548 min, 2.748 s	0.093	723
Eicosyl acetate	1.13	43.06	XIC(43.06Â±500ppm)	35340644	3393	1858	64.0048 min, 1.881 s	0.061	942
Nonadecanoic acid, TBDMS derivative	1.01	355.19	XIC(355.19Â±500ppm)	174988	144	139	64.0048 min, 2.314 s	0.074	702
Phenol, 2,2'-methylenebis[6-(1,1-dimethylethyl)-4-methyl-	1.05	177.13	XIC(177.13Â±500ppm)	97697915	4216	12149	64.1715 min, 2.878 s	0.12	885
9,12-Octadecadienoyl chloride, (Z,Z)-	2.08	43.06	XIC(43.06Â±500ppm)	1902164	184	99	64.4215 min, 2.210 s	0.062	830
Phosphoric acid, octyl diphenyl ester	2.56	55.07	XIC(55.07Â±500ppm)	4428186	514	275	64.5049 min, 2.869 s	0.107	789
Benz[a]anthracene	1.63	228.1	XIC(228.10Â±500ppm)	1561380	373	598	64.5882 min, 4.377 s	0.14	892
Farnesyl butanoate	1.1	69.08	XIC(69.08Â±500ppm)	638721	137	129	64.8382 min, 2.583 s	0.077	737
Benz[a]anthracene:2	1.61	228.1	XIC(228.10Â±500ppm)	2497806	1305	832	64.8382 min, 4.502 s	0.147	938
2-tert-Butyl-6-(3-tert-butyl-2-methoxy-5-methylbenzyl)-4-methylphenol	0.79	57.09	XIC(57.09Â±500ppm)	192517	235	52	65.4216 min, 2.747 s	0.086	719
Bis(2-ethylhexyl)hydrogen phosphate	1.06	98.98	XIC(98.98Â±500ppm)	33302375	3087	9993	65.755 min, 1.908 s	0.063	900
Naphthalene, 1-(2-naphthalenyloxy)-	1.01	270.12	XIC(270.12Â±500ppm)	392864	130	255	66.005 min, 4.372 s	0.122	819
N-Dodecylmethylamine	0.45	44.01	XIC(44.01Â±500ppm)	3578657	142	174	66.255 min, 6.462 s	0.042	740
2,2'-Methylenebis(6-tert-butyl-4 methylphenol), acetate	2.6	57.09	XIC(57.09Â±500ppm)	748514	140	86	66.505 min, 2.691 s	0.089	801
Nimbiol	1.09	187.09	XIC(187.09Â±500ppm)	1430870	278	550	66.505 min, 3.839 s	0.112	758
Nonadecanenitrile	1.07	57.08	XIC(57.08Â±500ppm)	619210	175	102	66.7551 min, 2.030 s	0.06	865
Docosanoic acid, methyl ester	1.08	74.04	XIC(74.04Â±500ppm)	12303628	3101	2036	67.0884 min, 1.866 s	0.055	747
9(1H)-Phenanthrenone, 2,3,4,4a,10,10a-hexahydro-6-hydroxy-1,1,4a-trimethyl-7-(1-methylethyl)-, (4aS-trans)-	1.1	69.08	XIC(69.08Â±500ppm)	368410	180	72	67.3384 min, 3.330 s	0.096	825
Undecane, 5,7-dimethyl-	1.88	57.09	XIC(57.09Â±500ppm)	4754654	345	431	67.5885 min, 1.646 s	0.065	832
Hexadecanoic acid, 4-nitrophenyl ester	1.08	57.09	XIC(57.09Â±500ppm)	1067314	364	170	67.7551 min, 2.255 s	0.068	748
Oxirane, [(hexadecyloxy)methyl]-	0.49	43.07	XIC(43.07Â±500ppm)	692854	115	90	68.4219 min, 1.838 s	0.085	772
(E)-tetradec-11-en-1-yl 2,2,3,3,3-pentafluoropopanoate	1.6	69.08	XIC(69.08Â±500ppm)	1824363	108	263	68.7552 min, 1.873 s	0.079	707
1-Docosanol, acetate	1.55	43.06	XIC(43.06Â±500ppm)	2348337	462	216	69.0886 min, 1.831 s	0.073	882
(E)-3,3'-Dimethoxy-4,4'-dihydroxystilbene	1.13	272.12	XIC(272.12Â±500ppm)	1038878	334	756	69.8386 min, 3.746 s	0.106	820
Hexadecanoic acid, 2-hydroxy-, methyl ester	1.01	57.09	XIC(57.09Â±500ppm)	345680	164	44	70.2553 min, 1.954 s	0.063	755
3-(3,4-Dimethoxyphenyl)-7-hydroxychromen-2-one	1.1	298.14	XIC(298.14Â±500ppm)	3979277	1754	1918	70.5054 min, 3.542 s	0.105	750
Octadecanoic acid, 2-propenyl ester	0.31	43.07	XIC(43.07Â±500ppm)	2147891	544	219	70.7554 min, 1.836 s	0.053	767
Octanamide, N-methyl-N-phenyl-	1.13	107.08	XIC(107.08Â±500ppm)	2085268	502	496	70.7554 min, 2.330 s	0.069	860
1-Heneicosanol	1.12	55.07	XIC(55.07Â±500ppm)	3361460	461	486	71.0887 min, 1.670 s	0.065	769
Succinic acid, 3-methylbut-2-en-1-yl diphenylmethyl ester	1.15	167.08	XIC(167.08Â±500ppm)	1096015	344	478	71.2554 min, 3.382 s	0.104	713
4-Methyl-dodec-3-en-1-ol	3.72	55.08	XIC(55.08Â±500ppm)	6624526	268	415	71.6721 min, 1.701 s	0.272	764
Phenol, 4,4'-methylenebis[2,6-dimethoxy-	1.11	320.14	XIC(320.14Â±500ppm)	208518	142	227	71.8388 min, 3.765 s	0.106	724
Tetracosanoic acid, methyl ester	1.07	74.04	XIC(74.04Â±500ppm)	9178378	1764	1457	71.9221 min, 1.822 s	0.054	876
Benzo[k]fluoranthene	1.49	252.1	XIC(252.10Â±500ppm)	716131	329	401	72.2555 min, 4.389 s	0.133	901
3-(3',4'-Dimethoxyphenyl)-7-methoxycoumarin	1.09	312.15	XIC(312.15Â±500ppm)	923919	542	886	72.5889 min, 3.359 s	0.1	712
Octadecanoic acid, 2-oxo-, methyl ester	1.25	57.09	XIC(57.09Â±500ppm)	781935	239	106	72.7555 min, 2.171 s	0.075	723
Heptacos-1-ene	1.05	68.07	XIC(68.07Â±500ppm)	2022034	452	290	73.1722 min, 1.751 s	0.051	886
n-Nonadecanol-1	6.58	55.07	XIC(55.07Â±500ppm)	1055557	154	124	73.6723 min, 1.662 s	0.098	748
Decanedioic acid, bis(2-ethylhexyl) ester	1	57.09	XIC(57.09Â±500ppm)	8665843	1859	836	73.6723 min, 1.924 s	0.062	892
(E,E)-7,11,15-Trimethyl-3-methylene-hexadeca-1,6,10,14-tetraene	0.25	81.08	XIC(81.08Â±500ppm)	2260668	154	278	73.7556 min, 2.135 s	0.068	774
2(1H)-Phenanthrenone, 3,4,4a,9,10,10a-hexahydro-6-methoxy-1,1,4a-trimethyl-7-(1-methylethyl)-, (4aS-trans)-	1.06	125.1	XIC(125.10Â±500ppm)	2461620	456	881	73.839 min, 3.863 s	0.113	722
Perylene	1.26	252.1	XIC(252.10Â±500ppm)	444494	267	242	73.9223 min, 4.681 s	0.136	878
Tridecanoic acid, methyl ester	1.08	74.04	XIC(74.04Â±500ppm)	1419422	559	404	74.2557 min, 1.801 s	0.052	778
Benzo[j]fluoranthene	1.12	252.1	XIC(252.11Â±500ppm)	567023	245	305	74.2557 min, 4.680 s	0.13	928
3a,5-Cyclo-5a-ergosta-6,8(14).22t-triene	0.97	69.08	XIC(69.08Â±500ppm)	303611	110	48	74.6724 min, 2.398 s	0.078	773
Ergost-5-en-3-ol, acetate, (3ÃŸ,24R)-	1.95	43.08	XIC(43.08Â±500ppm)	418834	106	46	74.9224 min, 2.308 s	0.066	723
Cholesta-6,22,24-triene, 4,4-dimethyl-	1.04	55.07	XIC(55.07Â±500ppm)	814556	242	81	75.6724 min, 2.271 s	0.07	879
3,4-Divanillyltetrahydrofuran	1.06	137.07	XIC(137.07Â±500ppm)	2428612	645	678	75.7558 min, 3.597 s	0.105	804
2-Tetradecanone	0.48	43.06	XIC(43.06Â±500ppm)	785407	240	92	76.1725 min, 1.804 s	0.064	712
17-Octadecynoic acid	0.69	55.07	XIC(55.07Â±500ppm)	2108631	152	221	76.4225 min, 1.809 s	0.069	727
Hexacosanoic acid, methyl ester	1.06	74.04	XIC(74.04Â±500ppm)	5490006	1096	1003	76.5058 min, 1.784 s	0.052	828
Oxalic acid, cyclohexylmethyl isohexyl ester	1.12	97.1	XIC(97.10Â±500ppm)	899011	153	344	76.5892 min, 1.714 s	0.062	786
Tridecanedioic acid, dimethyl ester	8.56	43.05	XIC(43.05Â±500ppm)	327386	108	44	76.7559 min, 1.969 s	0.052	736
2-Hexyl-1-octanol	0.89	43.07	XIC(43.07Â±500ppm)	283320	115	42	76.7559 min, 2.171 s	0.06	778
1-Hexyl-2-nitrocyclohexane	5.71	55.08	XIC(55.08Â±500ppm)	1621060	179	184	76.9225 min, 1.684 s	0.249	712
ÃŸ-Sitosterol acetate	0.82	43.08	XIC(43.08Â±500ppm)	1886597	364	129	76.9225 min, 2.269 s	0.068	802
Cholesta-4,6-dien-3-ol, (3ÃŸ)-	0.35	43.07	XIC(43.07Â±500ppm)	913391	215	78	77.3392 min, 2.440 s	0.077	797
Neoergosterol, acetate	0.79	55.08	XIC(55.08Â±500ppm)	144439	129	19	77.7559 min, 2.711 s	0.073	792
(E)-Hex-3-enyl (E)-2-methylbut-2-enoate	1.35	82.08	XIC(82.08Â±500ppm)	4887127	290	804	77.9226 min, 1.764 s	0.053	756
Retinol, acetate	1.26	55.07	XIC(55.07Â±500ppm)	1908489	324	155	78.006 min, 2.431 s	0.069	744
Hexacosyl acetate	1.13	43.07	XIC(43.07Â±500ppm)	4013618	792	322	78.1726 min, 1.796 s	0.056	897
5a-Ergost-8(14)-ene	1.83	43.07	XIC(43.07Â±500ppm)	1699227	107	123	78.756 min, 2.395 s	0.087	722
28-Nor-17a(H)-hopane	1.26	191.18	XIC(191.18Â±500ppm)	516660	183	210	78.756 min, 2.756 s	0.085	885
Stigmasta-3,5-diene	1.14	43.07	XIC(43.07Â±500ppm)	1823607	417	146	79.006 min, 2.488 s	0.073	803
(R)-2,8-Dimethyl-2-((3E,7E)-4,8,12-trimethyltrideca-3,7,11-trien-1-yl)chroman-6-ol	0.37	69.08	XIC(69.08Â±500ppm)	919402	340	132	79.1727 min, 2.737 s	0.083	727
1-Decanol, 2-methyl-	0.95	43.07	XIC(43.07Â±500ppm)	402517	111	42	79.2561 min, 2.026 s	0.062	730
Cyclopentane, 1,2-dimethyl-3-(1-methylethyl)-	6.45	55.07	XIC(55.07Â±500ppm)	2678713	145	206	79.5894 min, 1.765 s	0.467	752
Pregn-5-en-20-one, 3-(acetyloxy)-17-hydroxy-, (3ÃŸ)-	1	55.08	XIC(55.08Â±500ppm)	2542901	573	187	80.0895 min, 2.719 s	0.083	779
17a(H),21ÃŸ(H)-Hopane	1.2	191.19	XIC(191.19Â±500ppm)	973964	341	394	80.5062 min, 2.918 s	0.088	851
Heptacosanoic acid, methyl ester	1.1	74.04	XIC(74.04Â±500ppm)	2738989	603	398	80.7562 min, 1.962 s	0.058	805
Stigmastan-6,22-dien, 3,5-dedihydro-	1.11	81.05	XIC(81.05Â±500ppm)	591185	168	137	81.2562 min, 4.114 s	0.123	753
9,19-Cycloergost-24(28)-en-3-ol, 4,14-dimethyl-, acetate, (3ÃŸ,4a,5a)-	1.8	55.08	XIC(55.08Â±500ppm)	482255	116	67	81.3396 min, 2.786 s	0.083	834
(R)-2,7,8-Trimethyl-2-((3E,7E)-4,8,12-trimethyltrideca-3,7,11-trien-1-yl)chroman-6-ol	1.18	69.08	XIC(69.08Â±500ppm)	2642425	660	274	81.5062 min, 3.097 s	0.096	851
Betazole	1.32	82.08	XIC(82.08Â±500ppm)	1868467	412	492	82.2563 min, 2.057 s	0.066	735
Heptacosyl acetate	1.08	43.07	XIC(43.07Â±500ppm)	11932066	1838	730	82.3396 min, 2.075 s	0.063	933
Campesterol	1.12	43.07	XIC(43.07Â±500ppm)	6071904	497	336	82.423 min, 3.260 s	0.097	903
Neoergosterol	1.05	55.08	XIC(55.08Â±500ppm)	265918	172	32	82.5897 min, 3.795 s	0.101	799
17a(H),21ÃŸ(H)-Homohopane	0.85	95.09	XIC(95.09Â±500ppm)	376166	110	92	82.8397 min, 3.276 s	0.097	847
Stigmasterol	1.07	55.07	XIC(55.07Â±500ppm)	16360529	1599	979	83.0897 min, 3.340 s	0.103	927
Octatetracontane, 1-iodo-	0.79	57.09	XIC(57.09Â±500ppm)	10389465	607	1006	83.2564 min, 1.935 s	0.063	892
Obtusifoliol	3.15	55.07	XIC(55.07Â±500ppm)	1047841	139	96	83.7564 min, 3.554 s	0.172	775
22-Stigmasten-3-one	2.21	55.07	XIC(55.07Â±500ppm)	878350	101	102	84.0898 min, 3.685 s	0.181	715
1,6,10,14,18,22-Tetracosahexaen-3-ol, 2,6,10,15,19,23-hexamethyl-, (all-E)-(Â±)-	0.34	69.08	XIC(69.08Â±500ppm)	1661186	334	184	84.0898 min, 3.917 s	0.118	798
ÃŸ-Sitosterol	1.11	43.07	XIC(43.07Â±500ppm)	20607983	1470	966	84.1731 min, 3.591 s	0.115	922
Oxirane, [(dodecyloxy)methyl]-	0.47	43.07	XIC(43.07Â±500ppm)	1666246	148	163	84.2565 min, 2.268 s	0.077	718
Sulfurous acid, pentyl tridecyl ester	1.55	57.09	XIC(57.09Â±500ppm)	5006721	176	611	84.5898 min, 2.047 s	0.07	870
Cholest-5-en-3-ol, 24-propylidene-, (3ÃŸ)-	1.11	55.08	XIC(55.08Â±500ppm)	14018314	1056	934	84.5898 min, 3.817 s	0.116	898
Humulene epoxide I	0.33	93.07	XIC(93.07Â±500ppm)	620922	127	125	84.6732 min, 4.140 s	0.134	720
4-Campestene-3-one	0.96	43.07	XIC(43.07Â±500ppm)	3883875	1240	263	85.0065 min, 4.135 s	0.127	838
Stigmastane, 3-oxo-	2.47	43.07	XIC(43.07Â±500ppm)	1751115	216	98	85.1732 min, 3.971 s	0.184	763
Cholesta-4,6-dien-3-one	0.48	43.07	XIC(43.07Â±500ppm)	2625654	268	211	85.5899 min, 4.425 s	0.126	773
4,22-Stigmastadiene-3-one	1.1	55.07	XIC(55.07Â±500ppm)	8721446	664	666	85.6732 min, 4.244 s	0.127	878
Stigmasta-3,5-dien-7-one	1.12	174.11	XIC(174.11Â±500ppm)	2617359	695	1398	86.0066 min, 4.432 s	0.131	831
1-Heptatriacotanol	1.12	55.07	XIC(55.07Â±500ppm)	7432233	1109	524	86.1733 min, 4.527 s	0.144	734
Cholest-4-en-3-one	0.76	43.07	XIC(43.07Â±500ppm)	8800461	3016	445	86.7567 min, 4.593 s	0.165	809
Sulfurous acid, pentyl tetradecyl ester	1.27	57.09	XIC(57.09Â±500ppm)	5337890	349	517	87.0067 min, 2.325 s	0.08	857
Pregna-5,16-dien-20-one, 3-(acetyloxy)-, (3ÃŸ)-	0.98	55.07	XIC(55.07Â±500ppm)	855373	193	73	87.09 min, 4.155 s	0.127	711
Stigmasta-4,24(28)-dien-3-one, (24E)-	1.28	55.07	XIC(55.07Â±500ppm)	777037	113	89	87.09 min, 4.916 s	0.157	760
Astaxanthin	1.09	43.04	XIC(43.04Â±500ppm)	13525508	895	708	87.2567 min, 1.858 s	0.239	745
9,19-Cyclolanostan-3-ol, acetate, (3ÃŸ)-	1.06	43.07	XIC(43.07Â±500ppm)	9000291	1464	427	87.34 min, 4.930 s	0.155	783
Cyclopenta[d]anthracene-8,11-dione, 1,2,3,3a,4,5,6,6a,7,12-decahydro-3-isopropyl-6-methylene-	1.01	55.08	XIC(55.08Â±500ppm)	4831444	337	325	87.6734 min, 5.268 s	0.153	761
Oxirane, heptadecyl-	0.42	43.07	XIC(43.07Â±500ppm)	932005	227	89	88.5901 min, 3.031 s	0.169	827
Benzenepropanoic acid, 3,5-bis(1,1-dimethylethyl)-4-hydroxy-, octadecyl ester	1.09	57.09	XIC(57.09Â±500ppm)	9110148	1229	965	89.7569 min, 3.971 s	0.129	925
Sulfurous acid, 2-propyl tetradecyl ester	1.29	57.09	XIC(57.09Â±500ppm)	2645222	137	318	90.5903 min, 2.873 s	0.101	825
Ethanol, 2-(9-octadecenyloxy)-, (Z)-	2.01	55.07	XIC(55.07Â±500ppm)	11750760	834	714	91.8404 min, 3.999 s	0.131	847
Pyrazine, 2,6-diethyl-	1.59	135.04	XIC(135.04Â±500ppm)	7138595	166	1200	93.0072 min, 6.163 s	0.065	727
p-Anisic acid, 4-nitrophenyl ester	1.96	135.07	XIC(135.07Â±500ppm)	11262707	253	1731	95.2573 min, 6.160 s	0.057	715

## Sheet: Mangifera indica (PTFE11)
Name	Tailing.Factor	Base.Mass	Quant.Masses	Area	Peak.S.N	Quant.S.N	R.T...min.	FWHH..s.	Similarity
N-Methyl-2-isopropoxycarbonylazetidine	1.41	70.04	XIC(70.04Â±500ppm)	125040848	369	2227	3.66668 min, 1.750 s	0.099	753
o-n-Butylhydroxylamine	0.28	43.99	XIC(43.99Â±500ppm)	4003118	237	177	3.75002 min, 6.284 s	0.053	709
Propanoic acid, ethenyl ester	0.5	57.05	XIC(57.05Â±500ppm)	66477772	734	3207	3.83336 min, 1.779 s	0.426	713
2-Ethoxy-3-chlorobutane	1.22	45.04	XIC(45.04Â±500ppm)	721696936	5624	5773	4.08338 min, 1.510 s	0.248	782
Propyl pyruvate	0.8	43.02	XIC(43.02Â±500ppm)	428013432	1181	3654	4.08338 min, 1.662 s	0.081	829
Diazene, bis(1,1-dimethylethyl)-	2.36	57.08	XIC(57.08Â±500ppm)	131299600	1282	10748	4.41674 min, 1.503 s	0.173	766
1,3-Dioxolane, 2-methyl-	0.83	43.07	XIC(43.07Â±500ppm)	443890927	1471	5716	4.41674 min, 1.543 s	0.129	764
Furan, 3-methyl-	1.34	53.05	XIC(53.05Â±500ppm)	2177597	506	290	4.58342 min, 2.061 s	0.091	777
Pyrrole	1.18	67.04	XIC(67.04Â±500ppm)	17910469	2555	2674	4.7501 min, 2.102 s	0.101	855
1-Oxa-3,4-diazacyclopentadiene	0.64	70.08	XIC(70.08Â±500ppm)	26699595	184	2289	4.91678 min, 1.570 s	0.056	871
2(5H)-Furanone	1.22	55.03	XIC(55.03Â±500ppm)	19526648	3866	1520	5.00012 min, 2.548 s	0.119	841
Cyclopentanecarboxylic acid, 3-fluorophenyl ester	1.22	69.07	XIC(69.07Â±500ppm)	8986669	330	1185	5.50016 min, 1.642 s	0.074	764
Carbonocyanidic acid, ethyl ester	1.21	84.01	XIC(84.01Â±500ppm)	7346649	1535	1518	5.5835 min, 2.759 s	0.129	742
Cyclohexane, 1,1,2-trimethyl-	1.75	69.07	XIC(69.07Â±500ppm)	967603	202	172	6.91694 min, 1.721 s	0.146	782
3-Furaldehyde	1.81	96.01	XIC(96.01Â±500ppm)	1161779	288	348	7.16696 min, 2.645 s	0.153	742
Maleic anhydride	1.08	54.03	XIC(54.03Â±500ppm)	20317642	1955	2850	7.16696 min, 3.636 s	0.139	963
5-Hexen-2-one	1.13	43.03	XIC(43.03Â±500ppm)	7643932	585	202	7.2503 min, 3.192 s	0.141	701
2-Butenoic acid, 4-oxo-, methyl ester, (E)-	1.16	55.03	XIC(55.03Â±500ppm)	1153617	225	161	8.0837 min, 2.902 s	0.146	830
4-Cyclopentene-1,3-dione	1.08	96.01	XIC(96.01Â±500ppm)	4965415	826	1528	8.0837 min, 3.394 s	0.139	881
o-Xylene	1.12	91.05	XIC(91.05Â±500ppm)	5663032	1123	908	8.33372 min, 2.379 s	0.142	853
Butanoic acid, 4-hydroxy-	1.18	42.06	XIC(42.06Â±500ppm)	11624780	509	342	9.08378 min, 4.416 s	0.16	972
p-Benzoquinone	1.07	54.02	XIC(54.02Â±500ppm)	34787484	9114	3819	9.25046 min, 3.860 s	0.162	939
2-Cyclopenten-1-one, 2-hydroxy-	1.2	98.03	XIC(98.03Â±500ppm)	3761322	822	1347	9.50048 min, 3.310 s	0.138	893
2,5-Furandione, dihydro-3-methylene-	1.07	68.04	XIC(68.04Â±500ppm)	19687500	1562	2945	10.3339 min, 4.000 s	0.147	787
Decane, 5-methyl-	1.16	57.08	XIC(57.08Â±500ppm)	917549	130	223	11.0006 min, 1.723 s	0.084	755
Heptane, 4-azido-	0.45	43.05	XIC(43.05Â±500ppm)	1286403	139	85	11.1673 min, 1.720 s	0.083	725
4(3H)-Pyrimidinone, 3-methyl-	1.14	110.03	XIC(110.03Â±500ppm)	5223847	1255	985	11.7507 min, 4.150 s	0.162	748
2-Hydroxy-gamma-butyrolactone	1.19	57.05	XIC(57.05Â±500ppm)	8218575	2209	1126	12.1674 min, 4.813 s	0.184	902
2H-Pyran-2,6(3H)-dione	1.08	55.03	XIC(55.03Â±500ppm)	7183668	622	750	12.334 min, 3.796 s	0.138	876
1H-Pyrrole-2,5-dione	1.14	97.01	XIC(97.01Â±500ppm)	4544049	2455	1453	12.334 min, 4.109 s	0.144	922
Oxazolidine, 2,2-diethyl-3-methyl-	1.05	58.02	XIC(58.02Â±500ppm)	3258896	550	687	12.5007 min, 3.918 s	0.147	797
1H-Pyrrole-2-carboxaldehyde	1.22	95.03	XIC(95.03Â±500ppm)	10042954	1140	1606	13.0008 min, 3.915 s	0.14	918
p-Benzoquinone, 2-methyl-	1.11	54.02	XIC(54.02Â±500ppm)	21578088	1061	2252	13.1674 min, 3.993 s	0.151	864
2,5-Furandione, dihydro-3-methyl-	1.08	42.06	XIC(42.06Â±500ppm)	25739269	1093	1021	13.6675 min, 4.995 s	0.162	881
1,2-Cyclopentanedione, 3-methyl-	1.47	112.04	XIC(112.04Â±500ppm)	1969542	463	575	13.7508 min, 3.567 s	0.147	894
2-Amino-3-hydroxypyridine	1.08	110.03	XIC(110.03Â±500ppm)	864117	241	268	13.8342 min, 3.040 s	0.138	715
Benzene, 1-ethyl-4-methoxy-	1.05	121.02	XIC(121.02Â±500ppm)	1294860	374	641	14.0008 min, 3.192 s	0.134	765
Ethanone, 1-(2-pyridinyl)-	1.33	79.04	XIC(79.04Â±500ppm)	1804427	715	276	14.0842 min, 3.615 s	0.16	820
d-Arabinal	0.99	73.03	XIC(73.03Â±500ppm)	1746153	444	301	14.3342 min, 3.919 s	0.178	733
Ethyl diazoacetate	0.6	41.05	XIC(41.05Â±500ppm)	1388534	346	84	14.5842 min, 4.454 s	0.168	752
Phenol, 2-methyl-	1.12	108.05	XIC(108.05Â±500ppm)	883765	586	354	15.2509 min, 3.190 s	0.132	806
Pentanoic acid, 4-oxo-	1.32	43.03	XIC(43.03Â±500ppm)	11292129	1080	487	15.3343 min, 3.309 s	0.134	902
2,2-Dimethyl-5-hexen-3-ol	1	43.03	XIC(43.03Â±500ppm)	15444301	1360	460	15.3343 min, 4.194 s	0.179	774
5-Oxotetrahydrofuran-2-carboxylic acid, ethyl ester	1.05	85.02	XIC(85.02Â±500ppm)	122100460	2942	13735	15.4176 min, 5.786 s	0.2	902
2-Furancarboxylic acid	1.2	112.01	XIC(112.01Â±500ppm)	10206038	1967	2132	15.9177 min, 3.068 s	0.111	839
Phenol, 3-methyl-	1.17	107.04	XIC(107.04Â±500ppm)	5637761	1129	1298	16.1677 min, 3.217 s	0.122	914
2,5-Furandicarboxaldehyde	1.14	124.01	XIC(124.01Â±500ppm)	15409022	4983	3374	16.1677 min, 4.790 s	0.164	935
3,4-Furandiol, tetrahydro-, trans-	1.29	44.04	XIC(44.04Â±500ppm)	3544216	133	56	16.251 min, 4.319 s	0.15	783
2-Furancarboxylic acid, tetrahydro-3-methyl-5-oxo-	1.07	43.07	XIC(43.07Â±500ppm)	9129274	601	364	16.251 min, 5.056 s	0.165	886
N-Acetylethylenediamine	1.05	73.03	XIC(73.03Â±500ppm)	3973685	784	789	16.5844 min, 4.376 s	0.154	723
Phenol, 2-methoxy-	1.16	109.02	XIC(109.02Â±500ppm)	3741527	555	891	16.6677 min, 3.595 s	0.135	873
n-Caproic acid vinyl ester	1	43.07	XIC(43.07Â±500ppm)	13078912	681	517	16.6677 min, 4.987 s	0.165	872
1,2,3-Propanetriol, 1-acetate	1.22	43.03	XIC(43.03Â±500ppm)	8702117	883	481	16.9177 min, 3.857 s	0.155	926
2,5-Cyclohexadiene-1,4-dione, 2,6-dimethyl-	0.38	68.03	XIC(68.03Â±500ppm)	5840040	525	598	17.4178 min, 3.852 s	0.134	795
1H-Pyrazole	1.08	68.03	XIC(68.03Â±500ppm)	9197087	878	875	17.4178 min, 4.557 s	0.168	727
3-Pyridinol	1.11	95.03	XIC(95.03Â±500ppm)	239178451	3289	6663	17.5011 min, 3.588 s	0.127	927
Undecane, 5,7-dimethyl-	1.71	43.07	XIC(43.07Â±500ppm)	3747266	492	161	17.5845 min, 1.799 s	0.115	860
Octane, 2,3,3-trimethyl-	1.27	57.08	XIC(57.08Â±500ppm)	747747	174	139	17.7511 min, 1.855 s	0.181	848
Levoglucosenone	1.03	98.03	XIC(98.03Â±500ppm)	4615030	1773	1079	17.7511 min, 4.774 s	0.182	887
1,3-Benzodioxol-2-one	0.86	64.04	XIC(64.04Â±500ppm)	1543508	383	152	18.0012 min, 3.985 s	0.133	855
3-Hydroxypyridine monoacetate	1.32	95.03	XIC(95.03Â±500ppm)	21320246	2148	1676	18.0845 min, 3.795 s	0.153	848
2,5-Cyclohexadiene-1,4-dione, 2,3-dimethyl-	0.77	54.04	XIC(54.04Â±500ppm)	2684240	394	468	18.0845 min, 3.979 s	0.138	823
2,4(3H,5H)-Furandione, 3-methyl-	1.07	56.04	XIC(56.04Â±500ppm)	11447815	3501	1450	18.1678 min, 6.465 s	0.22	707
3-Pyridinol, 2-methyl-	1.76	109.04	XIC(109.04Â±500ppm)	21279069	1574	1904	18.4179 min, 3.538 s	0.135	904
1,2,4-Cyclopentanetrione, 3-methyl-	1.18	43.03	XIC(43.03Â±500ppm)	1408042	183	97	18.4179 min, 3.856 s	0.192	831
Succinimide	1.14	56.04	XIC(56.04Â±500ppm)	10517966	2430	1429	18.4179 min, 5.602 s	0.19	928
4-Pyridinone	1.44	95.03	XIC(95.03Â±500ppm)	8549368	719	735	18.5012 min, 3.282 s	0.12	834
Glutarimide	1.12	42.06	XIC(42.06Â±500ppm)	10784688	2720	408	19.4179 min, 4.829 s	0.168	889
Propane, 1-(ethenyloxy)-2-methyl-	1.1	57.08	XIC(57.08Â±500ppm)	1234002	320	250	19.5013 min, 2.839 s	0.113	766
Phenol, 3,4-dimethyl-	1.13	107.04	XIC(107.04Â±500ppm)	1250369	315	384	19.5013 min, 3.285 s	0.118	802
1,4-Dioxaspiro[2.4]heptan-5-one, 7-methyl-	1.05	42.06	XIC(42.06Â±500ppm)	14774818	1034	600	19.5846 min, 5.649 s	0.197	742
4-Acetylbutyric acid	1.08	43.03	XIC(43.03Â±500ppm)	3581726	283	229	19.7513 min, 3.394 s	0.118	926
2,6-Dimethyldecane	1.55	57.08	XIC(57.08Â±500ppm)	1399365	183	221	19.8346 min, 1.832 s	0.101	859
2(3H)-Furanone, dihydro-4-hydroxy-	1.09	44.04	XIC(44.04Â±500ppm)	108001300	2655	1083	19.918 min, 5.627 s	0.203	836
3-Pyridinol, 6-methyl-	2.32	109.05	XIC(109.05Â±500ppm)	9110741	1185	1245	20.0847 min, 3.492 s	0.136	894
2,3-Dihydroxybenzaldehyde	1.08	138.02	XIC(138.02Â±500ppm)	1020669	305	684	20.0847 min, 3.886 s	0.132	854
Methyl-a-d-ribofuranoside	1.06	57.04	XIC(57.04Â±500ppm)	127267532	2479	6974	20.0847 min, 5.064 s	0.188	743
Heptanediamide, N,N'-di-benzoyloxy-	1.15	105.03	XIC(105.03Â±500ppm)	6025907	1297	1089	20.168 min, 3.246 s	0.117	899
Cyclobutanone	0.65	42.03	XIC(42.03Â±500ppm)	24143801	1282	859	20.3347 min, 6.458 s	0.221	914
Sulfurous acid, 2-ethylhexyl isobutyl ester	1.4	57.08	XIC(57.08Â±500ppm)	605087	153	112	20.5847 min, 1.840 s	0.161	742
4H-Pyran-4-one, 3,5-dihydroxy-2-methyl-	1.12	142.02	XIC(142.02Â±500ppm)	1335670	570	898	20.9181 min, 3.670 s	0.122	873
1,2-Naphthalenedione	1.1	102.04	XIC(102.04Â±500ppm)	4100198	511	1105	21.0847 min, 4.306 s	0.143	890
(S)-(+)-2',3'-Dideoxyribonolactone	1.05	85.02	XIC(85.02Â±500ppm)	212053869	6458	13412	21.1681 min, 5.685 s	0.199	938
D-Fucose	1.12	71.05	XIC(71.05Â±500ppm)	15985341	1884	2249	21.2514 min, 4.456 s	0.164	783
1,4:3,6-Dianhydro-a-d-glucopyranose	1.04	69.04	XIC(69.04Â±500ppm)	1439507	265	253	21.5014 min, 4.872 s	0.192	798
Pentanedioic acid, monomethyl ester	1.15	43.03	XIC(43.03Â±500ppm)	2617007	142	142	21.5848 min, 3.189 s	0.115	834
5-Hydroxymethylfurfural	1.05	41.05	XIC(41.05Â±500ppm)	2440157	555	115	21.7515 min, 4.536 s	0.149	731
3-Formyl-4,5-dimethyl-pyrrole	1.38	122.06	XIC(122.06Â±500ppm)	1685539	621	624	21.8348 min, 3.513 s	0.129	775
Catechol	1.03	110.03	XIC(110.03Â±500ppm)	172758107	5228	13033	21.9181 min, 3.552 s	0.128	907
5-Methyl-1,3-cyclohexanedione	1.13	69.01	XIC(69.01Â±500ppm)	6043793	1068	837	21.9181 min, 5.679 s	0.186	807
2-Propenal, 3-phenyl-	1.12	131.06	XIC(131.06Â±500ppm)	1300571	249	685	22.5849 min, 4.613 s	0.147	879
3,4-Anhydro-d-galactosan	0.41	43.04	XIC(43.04Â±500ppm)	6846329	1413	436	22.5849 min, 5.010 s	0.178	844
Benzofuran, 2,3-dihydro-	1.07	120.07	XIC(120.07Â±500ppm)	5254537	2277	2784	22.7515 min, 3.561 s	0.118	854
2,3-Anhydro-d-mannosan	1.06	71.03	XIC(71.03Â±500ppm)	6213578	1521	2051	22.9182 min, 4.862 s	0.176	861
Hexanal, 3-methyl-	0.87	43.05	XIC(43.05Â±500ppm)	664058	153	75	22.9182 min, 5.645 s	0.16	805
2-Isopropoxyphenol	1.05	110.06	XIC(110.06Â±500ppm)	1503036	360	421	23.2516 min, 3.843 s	0.134	854
1-Benzofuran-5-ol	1.24	134.12	XIC(134.12Â±500ppm)	343821	236	380	23.5849 min, 3.967 s	0.127	874
2,3-Anhydro-d-galactosan	1.07	43.06	XIC(43.06Â±500ppm)	273208	111	49	24.085 min, 5.501 s	0.219	730
3-(Hydroxymethyl)-2-butanone, TBDMS derivative	1.13	129.13	XIC(129.13Â±500ppm)	114877	133	131	24.1683 min, 3.200 s	0.151	701
1,2-Benzenediol, 3-methoxy-	1.05	140.11	XIC(140.11Â±500ppm)	6933487	1336	4020	24.5017 min, 4.038 s	0.129	912
1,2-Benzenediol, 3-methyl-	1.06	124.1	XIC(124.10Â±500ppm)	3996058	822	2550	24.6684 min, 3.642 s	0.117	909
2,4(1H,3H)-Pyrimidinedione, dihydro-3-methyl-	1.1	43.07	XIC(43.07Â±500ppm)	1007968	212	116	24.7517 min, 5.275 s	0.202	714
Methylphosphonic acid, 2TMS derivative	1.14	225.12	XIC(225.12Â±500ppm)	318295	206	455	24.9184 min, 2.401 s	0.118	708
2(3H)-Furanone, 3-acetyldihydro-3-methyl-	1.09	43.05	XIC(43.05Â±500ppm)	1957430	489	262	25.2517 min, 5.529 s	0.198	747
Hydroquinone	1.07	110.07	XIC(110.07Â±500ppm)	42770908	2402	5609	25.3351 min, 4.147 s	0.129	896
Sulfurous acid, butyl 2-ethylhexyl ester	2.72	57.1	XIC(57.10Â±500ppm)	333846	245	141	25.5018 min, 1.789 s	0.131	718
Resorcinol	1.1	110.06	XIC(110.06Â±500ppm)	24690574	2009	2983	25.8351 min, 3.992 s	0.13	904
1,2-Benzenediol, 4-methyl-	1.08	124.07	XIC(124.07Â±500ppm)	20996218	2006	4049	26.0018 min, 3.588 s	0.115	913
1,3-Di-O-acetyl-a-ÃŸ-d-ribopyranose	1.11	43.03	XIC(43.03Â±500ppm)	66314040	3291	2489	26.2518 min, 4.107 s	0.144	741
1,2,4-Cyclopentanetriol	1.12	56.04	XIC(56.04Â±500ppm)	5013054	316	471	26.4185 min, 4.794 s	0.154	738
1-Nonene, 4,6,8-trimethyl-	0.36	71.09	XIC(71.09Â±500ppm)	796903	175	309	26.5018 min, 2.043 s	0.097	726
Benzaldehyde, 3-hydroxy-	1.15	122.02	XIC(122.02Â±500ppm)	29341264	2335	3031	26.6685 min, 4.111 s	0.135	943
Ethyl 2,3-epoxybutyrate	1.08	45.05	XIC(45.05Â±500ppm)	53512325	1113	1400	26.6685 min, 5.216 s	0.179	733
5-Acetoxymethyl-2-furaldehyde	0.98	126.02	XIC(126.02Â±500ppm)	4237205	686	1528	26.7519 min, 4.261 s	0.133	796
1H-1,2,4-Triazol-5-amine, 1-methyl-	1.02	43.03	XIC(43.03Â±500ppm)	6484906	439	290	26.7519 min, 5.758 s	0.163	777
1-Naphthalenol	1.38	115.05	XIC(115.05Â±500ppm)	1680631	295	385	26.9185 min, 4.268 s	0.158	708
2(1H)-Pyridinone, 3,4-dihydro-	2.75	43.03	XIC(43.03Â±500ppm)	5387499	548	248	27.0852 min, 5.118 s	0.178	707
3-Methoxy-5-methylphenol	1.12	138.06	XIC(138.06Â±500ppm)	17251231	1363	2432	27.2519 min, 3.795 s	0.127	898
2-Hexenoic acid, 3,4,4-trimethyl-5-oxo-, (Z)-	0.52	43.03	XIC(43.03Â±500ppm)	2070978	212	80	27.3352 min, 4.626 s	0.172	728
2,5-Monomethylene-l-rhamnitol	1.37	45.05	XIC(45.05Â±500ppm)	59708472	2768	1337	27.5019 min, 4.594 s	0.163	787
a-D-Mannopyranoside, methyl 3,6-anhydro-	0.99	43.03	XIC(43.03Â±500ppm)	4208287	128	119	27.5019 min, 5.694 s	0.171	721
1,3-Benzenediol, 2-methyl-	1.11	124.04	XIC(124.04Â±500ppm)	17795057	1417	2574	27.7519 min, 4.056 s	0.132	926
Hydrocinnamic acid	1.14	91.05	XIC(91.05Â±500ppm)	2033120	310	277	27.8353 min, 3.479 s	0.114	856
1-Hexene, 3,4,5-trimethyl-	0.88	41.06	XIC(41.06Â±500ppm)	1385235	118	87	27.9186 min, 1.915 s	0.204	744
Isoquinoline, 1-methyl-	1.91	143.07	XIC(143.07Â±500ppm)	1513517	397	503	27.9186 min, 4.266 s	0.158	831
2,4-Imidazolidinedione, 5-methyl-	0.54	43.06	XIC(43.06Â±500ppm)	11224826	637	406	27.9186 min, 5.223 s	0.234	880
Phenol, 4-(2-propenyl)-	1.34	134.06	XIC(134.06Â±500ppm)	710731	249	254	28.002 min, 3.582 s	0.116	783
6-Methyl-4-indanol	1.15	133.06	XIC(133.06Â±500ppm)	1662550	305	594	28.002 min, 3.883 s	0.124	716
Pentane, 2,2,4-trimethyl-	1.3	57.08	XIC(57.08Â±500ppm)	9529410	959	883	28.0853 min, 1.871 s	0.154	794
Phenol, 3,4-dimethoxy-	2.48	139.03	XIC(139.03Â±500ppm)	2179470	499	775	28.0853 min, 3.798 s	0.123	701
2-Methyl-5-hydroxybenzofuran	1.24	148.04	XIC(148.04Â±500ppm)	3752135	443	1090	28.0853 min, 3.925 s	0.162	839
2(3H)-Furanone, 5-acetyldihydro-	1.2	85.02	XIC(85.02Â±500ppm)	36486592	1002	3375	28.0853 min, 5.107 s	0.171	849
1,3-Benzenediol, 4-ethyl-	1.08	123.04	XIC(123.04Â±500ppm)	6182911	1080	988	28.252 min, 3.580 s	0.117	837
1(3H)-Isobenzofuranone	1.26	105.03	XIC(105.03Â±500ppm)	4856605	729	746	28.252 min, 5.422 s	0.186	853
1,4-Benzenediol, 2-methyl-	1.12	124.04	XIC(124.04Â±500ppm)	68493444	2756	6170	28.3353 min, 4.172 s	0.142	906
2-Pentanone	1.13	43.03	XIC(43.03Â±500ppm)	35443218	2817	937	28.4187 min, 5.372 s	0.195	790
1H-Inden-1-one, 2,3-dihydro-3-methyl-	1.15	145.06	XIC(145.06Â±500ppm)	6506416	382	1172	28.5853 min, 4.604 s	0.164	773
Acetic acid, hexyl ester	1.02	43.07	XIC(43.07Â±500ppm)	2236025	432	118	28.6687 min, 1.866 s	0.217	703
1,4-Benzenediol, 2,5-dimethyl-	1.05	138.06	XIC(138.06Â±500ppm)	15698414	1508	1871	28.6687 min, 3.623 s	0.118	838
Orcinol	1.13	124.04	XIC(124.04Â±500ppm)	35816283	1871	2790	28.6687 min, 4.048 s	0.131	898
1H-Indenol	1.18	132.05	XIC(132.05Â±500ppm)	8385777	806	1503	28.6687 min, 4.154 s	0.137	801
Resorcinol, 2TMS derivative	1.04	239.05	XIC(239.05Â±500ppm)	2031504	849	2152	28.8354 min, 2.400 s	0.112	731
Phenol, 2-methoxy-3-(2-propenyl)-	1.15	164.08	XIC(164.08Â±500ppm)	3125365	815	1070	28.8354 min, 3.466 s	0.119	896
6-Oxa-bicyclo[3.1.0]hexan-3-ol	1.07	57.05	XIC(57.05Â±500ppm)	6056750	521	378	28.8354 min, 6.206 s	0.221	746
1,6-Anhydro-ÃŸ-d-talopyranose	1.08	60.03	XIC(60.03Â±500ppm)	195647292	4123	5093	28.9187 min, 5.287 s	0.189	914
1,6-Anhydro-3,4-dideoxy-ÃŸ-D-gluco-hexopyranose	0.99	41.05	XIC(41.05Â±500ppm)	51953252	1021	1177	29.002 min, 5.559 s	0.191	785
Benzaldehyde, 4-hydroxy-	1.17	121.02	XIC(121.02Â±500ppm)	37630550	2165	3022	29.0854 min, 4.246 s	0.138	846
Benzonitrile, 2-ethoxy-	1.24	119.03	XIC(119.03Â±500ppm)	3157385	978	615	29.1687 min, 4.000 s	0.13	750
Threose triacetate	1.93	43.03	XIC(43.03Â±500ppm)	31227798	1014	829	29.3354 min, 4.114 s	0.17	765
Propanoic acid, 3-chloro-, 4-formylphenyl ester	1.19	121.02	XIC(121.02Â±500ppm)	847467	243	194	29.3354 min, 4.158 s	0.144	738
3-Hydroxy-2-methylbenzaldehyde	2.27	136.05	XIC(136.05Â±500ppm)	5020101	626	953	29.4187 min, 4.297 s	0.151	865
Ethanone, 1-[4-(1-methylethenyl)phenyl]-	3.52	145.06	XIC(145.06Â±500ppm)	1263707	457	503	29.5021 min, 4.021 s	0.147	714
D-Allose	2.27	60.03	XIC(60.03Â±500ppm)	54112851	1087	2213	29.5854 min, 5.053 s	0.211	848
DL-Proline, 5-oxo-, methyl ester	1.23	84.04	XIC(84.04Â±500ppm)	89740256	2473	5221	29.5854 min, 5.140 s	0.167	922
Phenol, 5-methoxy-2,3-dimethyl-	1.36	152.08	XIC(152.08Â±500ppm)	2659401	272	426	29.6688 min, 3.631 s	0.123	768
Heptane, 3,5-dimethyl-	3.48	57.05	XIC(57.05Â±500ppm)	17579496	398	1651	29.6688 min, 5.043 s	0.187	721
1,2,3-Benzenetriol	1.01	126.03	XIC(126.03Â±500ppm)	75591046	1415	5459	29.8354 min, 3.969 s	0.128	878
1,3-Benzenediol, 2,5-dimethyl-	1.13	138.06	XIC(138.06Â±500ppm)	7681821	621	1463	29.8354 min, 4.134 s	0.133	839
1,3,5-Triazine-2,4,6(1H,3H,5H)-trione, 1,3,5-trimethyl-	1.61	58.04	XIC(58.04Â±500ppm)	9082855	1801	922	29.8354 min, 4.631 s	0.163	944
Hydroquinone, acetate	1.14	110.03	XIC(110.03Â±500ppm)	17368685	812	1505	29.9188 min, 4.093 s	0.13	891
4-Ethylcatechol	1.14	123.04	XIC(123.04Â±500ppm)	74421829	3349	5432	30.0021 min, 3.590 s	0.117	902
1H-Indole, 5-methyl-	1.09	130.06	XIC(130.06Â±500ppm)	1972760	387	611	30.0021 min, 4.544 s	0.156	706
ÃŸ-D-Glucopyranose, 1,6-anhydro-	1.15	60.03	XIC(60.03Â±500ppm)	4781312	386	452	30.2521 min, 4.733 s	0.199	850
1,4-Benzenedicarboxaldehyde, 2-methyl-	1.16	148.05	XIC(148.05Â±500ppm)	2624051	296	645	30.3355 min, 4.159 s	0.134	810
(Butylamino)acetonitrile	1.23	69.04	XIC(69.04Â±500ppm)	7634870	1452	703	30.3355 min, 6.033 s	0.207	713
3-Hydroxy-4-methylbenzaldehyde	1.18	135.04	XIC(135.04Â±500ppm)	11562660	827	1752	30.4188 min, 4.131 s	0.132	884
Coumarin	1.06	118.04	XIC(118.04Â±500ppm)	1951005	390	404	30.4188 min, 5.116 s	0.179	784
Ethanone, 1-(3-hydroxyphenyl)-	1.15	121.02	XIC(121.02Â±500ppm)	29090262	1904	4115	30.5022 min, 4.238 s	0.137	910
Vanillin	1.24	151.03	XIC(151.03Â±500ppm)	136447565	3238	5297	30.5022 min, 4.602 s	0.157	929
1,4-Benzenediol, 2-methoxy-	1.16	140.04	XIC(140.04Â±500ppm)	25767939	1494	3741	30.5855 min, 4.419 s	0.142	905
2,5-Dihydroxybenzaldehyde	1.18	138.03	XIC(138.03Â±500ppm)	3678577	646	665	30.6688 min, 4.307 s	0.149	852
1,3-Isobenzofurandione, 4-methyl-	0.93	90.05	XIC(90.05Â±500ppm)	1622563	309	463	30.6688 min, 4.709 s	0.15	854
4-Hydroxy-2-methylbenzaldehyde	1.18	135.04	XIC(135.04Â±500ppm)	8978738	2755	1522	30.7522 min, 4.071 s	0.135	911
7-Methylindan-1-one	0.9	117.07	XIC(117.07Â±500ppm)	981307	181	210	30.8355 min, 4.592 s	0.164	778
1,4-Naphthalenedione	1.08	158.03	XIC(158.03Â±500ppm)	1053454	378	461	30.8355 min, 5.090 s	0.17	872
Phenol, 2-methoxy-4-(2-propenyl)-, acetate	1.22	164.08	XIC(164.08Â±500ppm)	2797338	741	664	30.9189 min, 3.599 s	0.122	854
1,3-Benzenediol, 4,5-dimethyl-	1.04	138.06	XIC(138.06Â±500ppm)	4873531	527	789	30.9189 min, 3.747 s	0.119	820
Benzonitrile, 4-hydroxy-	1.23	119.03	XIC(119.03Â±500ppm)	2944642	626	563	30.9189 min, 4.279 s	0.141	798
5-Hydroxy-2-methylbenzaldehyde	2.11	107.04	XIC(107.04Â±500ppm)	3828685	773	819	31.0022 min, 4.186 s	0.142	905
3,4-Dihydroxybenzhydrazide	1.15	137.02	XIC(137.02Â±500ppm)	7067390	841	1297	31.1689 min, 3.956 s	0.22	769
Benzeneacetic acid, 2,5-dihydroxy-	0.98	122.03	XIC(122.03Â±500ppm)	960820	297	227	31.1689 min, 6.184 s	0.187	739
1H-Indene, 2,3-dihydro-1,1,3-trimethyl-	1.72	145.06	XIC(145.06Â±500ppm)	2249324	290	659	31.2522 min, 4.233 s	0.16	711
1H-Isoindole-1,3(2H)-dione, 2-methyl-	1.26	161.04	XIC(161.04Â±500ppm)	1421146	568	445	31.3356 min, 4.842 s	0.164	869
2(3H)-Naphthalenone, 4,4a,5,6,7,8-hexahydro-	1.13	122.04	XIC(122.04Â±500ppm)	1761871	230	340	31.3356 min, 5.390 s	0.155	759
Tricyclo[3.3.1.0(2,8)]nona-3,6-dien-9-one	1.09	131.04	XIC(131.04Â±500ppm)	2019058	515	340	31.3356 min, 5.468 s	0.19	846
4-Hydroxy-3-methylacetophenone	1.26	135.04	XIC(135.04Â±500ppm)	3653225	430	571	31.5022 min, 4.219 s	0.149	757
Benzoic acid, 3-hydroxy-, methyl ester	1.23	121.02	XIC(121.02Â±500ppm)	25518573	1328	2515	31.7523 min, 3.909 s	0.127	905
Ethyl p-hydroxybenzoate	0.92	123.04	XIC(123.04Â±500ppm)	17820518	717	2292	31.7523 min, 4.071 s	0.124	825
1,5-Anhydro-d-mannitol	0.57	43.03	XIC(43.03Â±500ppm)	48202269	465	1084	31.7523 min, 4.766 s	0.144	703
Orcinol, 2TMS derivative	1.15	253.07	XIC(253.07Â±500ppm)	200776	166	316	31.8356 min, 2.359 s	0.099	711
2,2-Dimethylindene, 2,3-dihydro-	1.09	131.04	XIC(131.04Â±500ppm)	2154860	274	556	31.9189 min, 4.054 s	0.128	764
1-(2,4-Dimethyl-furan-3-yl)-ethanone	1.1	123.04	XIC(123.04Â±500ppm)	3409931	532	664	32.0856 min, 3.960 s	0.123	755
2-Propyn-1-ol, 3-(4-methylphenyl)-	1.49	131.04	XIC(131.04Â±500ppm)	1834201	262	530	32.0856 min, 4.017 s	0.177	733
4-Methylphthalic anhydride	1.09	118.05	XIC(118.05Â±500ppm)	3814209	422	583	32.0856 min, 4.735 s	0.154	884
3,4,5-Trihydroxytoluene	2.65	140.04	XIC(140.04Â±500ppm)	2853957	403	682	32.2523 min, 4.018 s	0.147	735
Acetophenone, 4'-hydroxy-	1.19	121.02	XIC(121.02Â±500ppm)	33707048	1587	2942	32.3356 min, 4.363 s	0.139	930
Acenaphthylene	1.06	152.06	XIC(152.06Â±500ppm)	1361010	229	319	32.3356 min, 4.446 s	0.141	767
2-Hydroxy-5-methylisophthalaldehyde	1.04	136.05	XIC(136.05Â±500ppm)	13560840	641	1646	32.5023 min, 4.397 s	0.138	738
1,6:2,3-Dianhydro-4-O-acetyl-ÃŸ-d-allopyranose	1.08	43.03	XIC(43.03Â±500ppm)	10903360	735	479	32.5023 min, 5.199 s	0.23	764
Phenol, 2-methoxy-4-(1-propenyl)-	1.23	164.08	XIC(164.08Â±500ppm)	35008258	1367	3665	32.669 min, 3.626 s	0.119	923
p-Hydroxyphenylacetone	1.16	107.04	XIC(107.04Â±500ppm)	15990567	1727	1645	32.669 min, 4.418 s	0.146	856
5-Isopropyl-2,4-imidazolidinedione	1.23	100.02	XIC(100.02Â±500ppm)	13868120	1806	2175	32.669 min, 4.875 s	0.163	837
1,4-Benzenedicarboxaldehyde, 2,5-dimethyl-	1.13	161.06	XIC(161.06Â±500ppm)	9596700	603	1814	32.8357 min, 3.873 s	0.136	707
Xylitol, 1,5-anhydro-, triacetate	5.17	43.03	XIC(43.03Â±500ppm)	5812051	591	323	32.919 min, 3.783 s	0.17	728
Ethanone, 1-(2,3,4-trihydroxyphenyl)-	0.99	153.01	XIC(153.01Â±500ppm)	4081717	355	669	32.919 min, 4.209 s	0.129	834
1,6:3,4-Dianhydro-2-O-acetyl-ÃŸ-d-altropyranose	0.37	43.03	XIC(43.03Â±500ppm)	7369045	539	318	32.919 min, 5.256 s	0.215	821
5-Hydroxy-3-methyl-1-indanone	1.27	162.06	XIC(162.06Â±500ppm)	2862409	647	992	33.0024 min, 3.893 s	0.13	723
Methylparaben	1.3	121.02	XIC(121.02Â±500ppm)	16177620	3021	1591	33.0024 min, 4.035 s	0.133	876
Phenol, 2-methoxy-4-propyl-	1.16	137.06	XIC(137.06Â±500ppm)	23413266	1199	2626	33.0024 min, 4.428 s	0.141	871
o-Cyanobenzoic acid	1.15	76.03	XIC(76.03Â±500ppm)	8378873	757	934	33.0024 min, 5.237 s	0.155	939
1,6-Methanonaphthalene, decahydro-	1.17	79.06	XIC(79.06Â±500ppm)	1910954	114	132	33.0024 min, 5.439 s	0.158	741
3H-Cyclopenta[c]pyridazin-3-one, 2,5,6,7-tetrahydro-	1	136.05	XIC(136.05Â±500ppm)	1826794	237	376	33.0857 min, 4.230 s	0.133	707
Naphthalene, 1,2,3,4-tetrahydro-6-propyl-	1.1	145.06	XIC(145.06Â±500ppm)	823178	141	240	33.169 min, 3.846 s	0.132	742
4-Hydroxy-2-methylacetophenone	1.18	135.04	XIC(135.04Â±500ppm)	1180146	219	272	33.3357 min, 4.099 s	0.134	779
3,5-Dimethyl-4-hydroxybenzaldehyde	1.24	149.05	XIC(149.05Â±500ppm)	2362949	429	570	33.3357 min, 4.451 s	0.152	858
4-Methylphthalaldehyde	1.13	119.04	XIC(119.04Â±500ppm)	1158906	293	173	33.5857 min, 5.133 s	0.182	804
Hydroxychavicol	1.07	150.06	XIC(150.06Â±500ppm)	1360387	375	367	33.6691 min, 3.692 s	0.119	871
1,3-Benzenediol, 4-propyl-	1.12	123.04	XIC(123.04Â±500ppm)	17176139	1790	2534	33.7524 min, 3.514 s	0.111	854
Phenol, 2,6-dimethoxy-, acetate	0.46	154.06	XIC(154.06Â±500ppm)	4657631	317	640	33.8358 min, 4.474 s	0.147	723
6-Methoxy-3-methylbenzofuran	1.12	147.04	XIC(147.04Â±500ppm)	5949749	617	826	33.9191 min, 4.177 s	0.14	746
Apocynin	1.31	151.03	XIC(151.03Â±500ppm)	168271431	3017	5849	34.0858 min, 4.451 s	0.152	892
2,6-Dimethylphenyl isocyanate	1.18	147.06	XIC(147.06Â±500ppm)	2579587	186	427	34.0858 min, 4.861 s	0.144	752
Benzo[b]thiophene, 3,5-dimethyl-	1.33	162.06	XIC(162.06Â±500ppm)	2577916	538	579	34.1691 min, 3.975 s	0.14	768
Benzoic acid, 3-hydroxy-	3.86	121.02	XIC(121.02Â±500ppm)	12804301	1032	963	34.3358 min, 3.826 s	0.126	749
t-Butylhydroquinone	1.16	166.05	XIC(166.05Â±500ppm)	17514478	813	1768	34.3358 min, 4.023 s	0.13	763
Paroxypropione	0.45	121.02	XIC(121.02Â±500ppm)	10460532	515	1262	34.3358 min, 4.068 s	0.125	819
Benzaldehyde, 2-hydroxy-4-methoxy-6-methyl-	1.29	166.06	XIC(166.06Â±500ppm)	10164949	661	1131	34.5025 min, 4.320 s	0.148	730
5H-1-Pyrindine, 6,7-dihydro-4-amino-2,3-dimethyl-, hydrate	0.48	162.06	XIC(162.06Â±500ppm)	3749640	422	1068	34.5858 min, 4.091 s	0.127	771
3-Methoxy-5-propylphenol	1.92	138.07	XIC(138.07Â±500ppm)	11726668	568	1347	34.6692 min, 3.561 s	0.117	845
2-Naphthalenecarboxaldehyde	1.31	127.05	XIC(127.05Â±500ppm)	1609685	116	301	34.6692 min, 4.786 s	0.163	725
1,3-Benzodioxol-5-amine	1.24	137.04	XIC(137.04Â±500ppm)	3516654	461	439	34.7525 min, 1.635 s	0.228	701
Benzo[b]thiophene, 2-ethyl-	1.21	147.04	XIC(147.04Â±500ppm)	6831177	502	755	34.8358 min, 3.901 s	0.132	751
Propanoic acid, 3-(acetyloxy)-, anhydride	1.11	43.03	XIC(43.03Â±500ppm)	128369144	1651	1967	34.8358 min, 5.287 s	0.158	733
1-Octanol, 2-methyl-	0.71	71.09	XIC(71.09Â±500ppm)	1431196	104	195	35.0025 min, 1.927 s	0.123	770
Ethanone, 1-(2,5-dihydroxyphenyl)-	1.25	137.02	XIC(137.02Â±500ppm)	21352117	1598	2267	35.0025 min, 4.375 s	0.141	887
Menadione	0.99	172.05	XIC(172.05Â±500ppm)	1945040	232	723	35.0859 min, 4.718 s	0.146	846
4-Hydroxy-3-methylbenzoic acid, methyl ester	3.89	135.04	XIC(135.04Â±500ppm)	7143622	447	853	35.2525 min, 3.887 s	0.124	849
2H-1-Benzopyran-2-one, 3,4-dihydro-6-hydroxy-	1.21	122.03	XIC(122.03Â±500ppm)	107637430	2448	5260	35.2525 min, 5.104 s	0.161	813
p-Cymene-2,5-diol	1.07	151.07	XIC(151.07Â±500ppm)	1494377	367	248	35.3359 min, 3.476 s	0.111	802
Benzoic acid, 4-hydroxy-3-methoxy-, methyl ester	1.24	151.03	XIC(151.03Â±500ppm)	27015593	1844	2327	35.3359 min, 4.129 s	0.14	914
2-Propanone, 1-(4-methoxyphenyl)-	0.35	121.06	XIC(121.06Â±500ppm)	7362232	459	911	35.3359 min, 4.282 s	0.134	749
1,2-Dimethoxy-4-(2-methoxyethenyl)benzene	1.2	194.09	XIC(194.09Â±500ppm)	1377278	427	694	35.4192 min, 3.701 s	0.128	744
2H-Benzimidazol-2-one, 1,3-dihydro-5-methoxy-	0.99	43.03	XIC(43.03Â±500ppm)	1150691	233	50	35.4192 min, 5.634 s	0.158	707
Phenol, 2-ethoxy-4-(2-propenyl)-	1.35	150.07	XIC(150.07Â±500ppm)	5659046	380	941	35.5859 min, 4.221 s	0.168	727
Hexadecyl octyl ether	1.99	57.08	XIC(57.08Â±500ppm)	2538710	148	195	35.6692 min, 1.863 s	0.166	828
Benzene, 1,2,3-trimethoxy-5-methyl-	1.49	167.06	XIC(167.06Â±500ppm)	313247755	4320	9442	35.7526 min, 3.774 s	0.152	760
6-Hydroxyeugenol	1.33	180.07	XIC(180.07Â±500ppm)	8008935	762	731	35.8359 min, 3.825 s	0.136	720
2-Propanone, 1-(4-hydroxy-3-methoxyphenyl)-	1.33	137.05	XIC(137.05Â±500ppm)	450276691	5955	11530	35.9193 min, 4.326 s	0.16	881
D-Mannitol	2.04	73.03	XIC(73.03Â±500ppm)	5453370	203	835	36.0026 min, 4.580 s	0.172	702
7-Acetyloxychromanone	1.2	136.02	XIC(136.02Â±500ppm)	3442404	672	509	36.0026 min, 5.315 s	0.176	752
Benzene, 1-methyl-3-nitro-	1.24	137.06	XIC(137.06Â±500ppm)	2876275	331	229	36.0859 min, 3.469 s	0.111	705
5-Sec-butylpyrogallol	1.12	153.05	XIC(153.05Â±500ppm)	21169204	2503	2971	36.0859 min, 3.619 s	0.118	732
Naphthalene, 1,2-dihydro-7-methoxy-	0.72	145.06	XIC(145.06Â±500ppm)	3537435	275	542	36.0859 min, 3.897 s	0.169	733
2H-1-Benzopyran-2-one, 7-methyl-	1.22	160.05	XIC(160.05Â±500ppm)	3458959	584	502	36.1693 min, 5.672 s	0.188	824
Fenipentol	1.12	107.05	XIC(107.05Â±500ppm)	3246618	335	333	36.1693 min, 6.238 s	0.219	727
Benzene, ethylpentamethyl-	1.1	161.06	XIC(161.06Â±500ppm)	2682641	204	320	36.2526 min, 3.780 s	0.124	708
Polygalitol	1.98	73.03	XIC(73.03Â±500ppm)	28033534	800	1568	36.2526 min, 4.490 s	0.327	775
Benzoic acid, 2-(cyanomethyl)-	1.24	161.04	XIC(161.04Â±500ppm)	5619678	842	1040	36.2526 min, 4.926 s	0.164	748
1,3-Cyclobutanedione, 2,2,4,4-tetramethyl-	1.04	42.04	XIC(42.04Â±500ppm)	14633125	305	248	36.336 min, 2.850 s	0.248	729
1,6-Anhydro-a-d-galactofuranose	0.41	73.03	XIC(73.03Â±500ppm)	37548901	874	1851	36.4193 min, 5.413 s	0.16	745
Sulfurous acid, pentyl tetradecyl ester	1.07	57.08	XIC(57.08Â±500ppm)	1032093	132	173	36.586 min, 1.915 s	0.144	838
1,2,4-Benzenetriol	1.22	126.03	XIC(126.03Â±500ppm)	15960697	1484	1560	36.586 min, 4.364 s	0.153	735
Benzofuran, 5-methoxy-6,7-dimethyl-	1.29	161.06	XIC(161.06Â±500ppm)	6185577	1171	1067	36.6693 min, 3.706 s	0.134	805
3,4-Dimethoxyphenylacetone	1.32	151.07	XIC(151.07Â±500ppm)	3985052	408	644	36.6693 min, 3.959 s	0.138	720
1H-Indene-1,5(6H)-dione, 2,3,7,7a-tetrahydro-7a-methyl-	1.12	122.07	XIC(122.07Â±500ppm)	1181644	128	173	36.7527 min, 5.165 s	0.156	771
Benzofurane-3-carboxaldehyde, 2-methyl-	1.1	160.05	XIC(160.05Â±500ppm)	1979651	310	416	36.836 min, 5.557 s	0.185	786
1-Naphthalenol, 2-methyl-	1.15	158.07	XIC(158.07Â±500ppm)	869963	148	269	36.9193 min, 4.504 s	0.136	709
2H-1-Benzopyran-2-one, 8-hydroxy-	1.19	134.04	XIC(134.04Â±500ppm)	31140601	2009	2322	36.9193 min, 5.256 s	0.171	907
Pentadecane, 4-methyl-	2.45	57.08	XIC(57.08Â±500ppm)	1110376	368	152	37.0027 min, 1.859 s	0.17	857
8-Hydroxy-2-octanone	0.68	43.03	XIC(43.03Â±500ppm)	1363772	166	67	37.086 min, 3.252 s	0.097	705
1H-1,3-Benzimidazole, 5-methoxy-1-methyl-2-(4-morpholinylmethyl)-	1.45	176.08	XIC(176.08Â±500ppm)	2425601	887	807	37.086 min, 3.771 s	0.136	729
1-Phthalanol, 1,3,3-trimethyl-	1.33	145.06	XIC(145.06Â±500ppm)	3843559	546	617	37.086 min, 4.013 s	0.137	731
a-D-Glucopyranose, 4-O-ÃŸ-D-galactopyranosyl-	1.22	43.03	XIC(43.03Â±500ppm)	37661173	893	756	37.086 min, 4.895 s	0.208	703
3-Hydroxy-4-methoxybenzoic acid	1.14	168.04	XIC(168.04Â±500ppm)	24122099	1053	3836	37.1694 min, 4.137 s	0.131	798
Hexahydropyrrolizin-3-one	1.57	70.07	XIC(70.07Â±500ppm)	4649987	120	432	37.1694 min, 5.948 s	0.212	717
3,4-Dimethoxybenzoic anhydride	1.16	165.05	XIC(165.05Â±500ppm)	40371020	324	1433	37.2527 min, 4.427 s	0.138	754
3-Deoxy-d-mannoic lactone	1.12	45.05	XIC(45.05Â±500ppm)	2848440	157	134	37.2527 min, 5.610 s	0.162	786
2,6-Dimethoxybenzoquinone	1.08	69.01	XIC(69.01Â±500ppm)	30668305	1162	1397	37.2527 min, 5.874 s	0.165	887
3-Methoxyphenol, TMS derivative	1.33	181.08	XIC(181.08Â±500ppm)	3569027	968	664	37.4194 min, 3.525 s	0.126	728
a-D-Glucopyranoside, methyl	0.69	60.03	XIC(60.03Â±500ppm)	2125872	155	221	37.4194 min, 4.481 s	0.154	769
3-Methoxy-4,5-methylenedioxybenzaldehyde	1.22	179.03	XIC(179.03Â±500ppm)	3630656	448	835	37.4194 min, 4.792 s	0.144	844
2-Cyclopenten-1-one, 2-(4-methyl-2-furyl)-	1.2	162.06	XIC(162.06Â±500ppm)	3387452	370	412	37.4194 min, 5.563 s	0.19	705
4-(1-Hydroxyallyl)-2-methoxyphenol	1.17	137.06	XIC(137.06Â±500ppm)	30560581	823	2015	37.5861 min, 4.368 s	0.141	915
5-Methyl-2H-isoindole-1,3-dione	0.59	43.03	XIC(43.03Â±500ppm)	3569092	149	172	37.5861 min, 5.016 s	0.149	714
3-Deoxy-d-mannonic acid	0.61	44.04	XIC(44.04Â±500ppm)	6993508	135	72	37.5861 min, 5.503 s	0.172	728
1-Propanone, 1-(4-hydroxy-3-methoxyphenyl)-	1.5	151.04	XIC(151.04Â±500ppm)	63363329	1563	3609	37.8361 min, 4.183 s	0.152	753
2H-1-Benzopyran-2-one, 4,6-dimethyl-	1.43	174.06	XIC(174.06Â±500ppm)	1770719	306	543	37.8361 min, 4.447 s	0.167	780
Phenol, 2-methoxy-4-(1-propenyl)-, (Z)-	1.19	164.08	XIC(164.08Â±500ppm)	19421030	1540	2049	37.9194 min, 3.894 s	0.126	773
Butyrovanillone	1.29	151.03	XIC(151.03Â±500ppm)	38092972	1693	2421	38.0861 min, 4.187 s	0.133	918
2H-1-Benzopyran-2-one, 3-methyl-	1.51	131.05	XIC(131.05Â±500ppm)	5593716	404	628	38.0861 min, 5.273 s	0.218	813
Nonanedioic acid, monomethyl ester	1.05	55.06	XIC(55.06Â±500ppm)	1228593	209	82	38.1694 min, 3.103 s	0.098	779
1-(4-Hydroxybenzylidene)acetone	1.2	162.06	XIC(162.06Â±500ppm)	6809686	760	981	38.1694 min, 4.460 s	0.155	726
3,4-Dihydroxy-5-methoxybenzaldehyde	1.09	168.04	XIC(168.04Â±500ppm)	16070209	1184	2147	38.2528 min, 4.860 s	0.135	827
3-Methyl-3,4,5,6-tetrahydrophthalic anhydride	1.25	79.06	XIC(79.06Â±500ppm)	15368332	800	783	38.2528 min, 6.334 s	0.215	751
Benzoic acid, 3,4-dimethoxy-, methyl ester	1.3	165.05	XIC(165.05Â±500ppm)	2424981	405	462	38.3361 min, 4.149 s	0.135	800
Benzaldehyde, 3,4-dihydroxy-	1.27	138.03	XIC(138.03Â±500ppm)	2481072	282	395	38.4195 min, 4.317 s	0.152	736
2-(1-Hydroxybut-2-enylidene)cyclohexanone	1.12	151.04	XIC(151.04Â±500ppm)	4691584	403	579	38.5028 min, 4.311 s	0.132	710
2,5-Dihydroxypropiophenone	1.46	137.01	XIC(137.01Â±500ppm)	4969298	297	806	38.5861 min, 4.158 s	0.157	865
2H-1-Benzopyran-2-one, 7-methoxy-	1.18	133.03	XIC(133.03Â±500ppm)	3221179	358	498	38.6695 min, 4.790 s	0.161	710
4-Hydroxy-1-indanone	1.2	148.05	XIC(148.05Â±500ppm)	27540230	2024	2063	38.6695 min, 5.136 s	0.169	887
Phenol, 2,6-dimethoxy-4-(2-propenyl)-	1.45	194.09	XIC(194.09Â±500ppm)	160966233	2361	5383	38.7528 min, 3.793 s	0.147	926
Benzaldehyde, 3,4,5-trimethoxy-	1.3	196.07	XIC(196.07Â±500ppm)	13281301	1162	2311	38.7528 min, 4.330 s	0.149	821
Homosyringaldehyde	1.27	167.06	XIC(167.06Â±500ppm)	127951736	3760	5978	39.0028 min, 3.582 s	0.125	815
3,4,5-Trimethoxyphenol	1.23	169.04	XIC(169.04Â±500ppm)	105834096	2102	4852	39.0862 min, 4.405 s	0.149	912
1,5-Anhydroglucitol	0.26	43.03	XIC(43.03Â±500ppm)	32199099	539	844	39.0862 min, 4.983 s	0.274	733
Acetyl eugenol	1.17	164.08	XIC(164.08Â±500ppm)	2427798	301	499	39.1695 min, 3.745 s	0.127	788
6-Methoxychroman-2-one	1.17	136.05	XIC(136.05Â±500ppm)	7221056	954	898	39.3362 min, 4.861 s	0.158	735
1H-Inden-1-one, 2,3-dihydro-7-hydroxy-3-methyl-	1.24	147.04	XIC(147.04Â±500ppm)	10668343	645	889	39.4195 min, 4.654 s	0.155	818
6-Hydroxy-4-methylcoumarin	1.24	176.04	XIC(176.04Â±500ppm)	12722898	1002	1688	39.6696 min, 4.784 s	0.156	853
3(2H)-Benzofuranone, 4,7-dimethyl-	0.55	162.06	XIC(162.06Â±500ppm)	12552934	448	1492	39.7529 min, 4.958 s	0.176	750
Pyrazole, 5-(4-methoxyphenyl)-	1.28	159.04	XIC(159.04Â±500ppm)	1965539	283	288	39.9196 min, 5.208 s	0.173	760
4H-1-benzothiopyran-4-one	1.31	162.03	XIC(162.03Â±500ppm)	33096445	1613	2316	40.0029 min, 5.680 s	0.187	727
Sulfurous acid, octyl 2-propyl ester	1.5	43.06	XIC(43.06Â±500ppm)	462678	129	31	40.1696 min, 2.480 s	0.103	703
Naphthalene, 1-ethoxy-	0.96	172.05	XIC(172.05Â±500ppm)	869239	245	263	40.1696 min, 5.125 s	0.18	747
Precocene I	8.04	175.07	XIC(175.07Â±500ppm)	468620	188	170	40.2529 min, 3.606 s	0.124	725
1-Naphthalenecarboxaldehyde, 2-hydroxy-	0.98	144.05	XIC(144.05Â±500ppm)	1459338	445	313	40.2529 min, 5.214 s	0.276	706
Toluene, 4-(1,1-dimethyl-2-propynyloxy)-	1.77	159.08	XIC(159.08Â±500ppm)	754403	181	202	40.3363 min, 3.837 s	0.143	731
Idosan triacetate	1.67	43.03	XIC(43.03Â±500ppm)	56563204	1073	1351	40.3363 min, 4.043 s	0.141	772
Benzenepropanol, 4-hydroxy-3-methoxy-	1.18	137.05	XIC(137.05Â±500ppm)	119783595	3021	7116	40.3363 min, 4.191 s	0.138	908
1(2H)-Acenaphthylenone	1.22	140.06	XIC(140.06Â±500ppm)	8465741	1181	1169	40.4196 min, 5.148 s	0.168	864
Naphthalene, 2-ethoxy-	1.52	144.05	XIC(144.05Â±500ppm)	2939671	464	430	40.4196 min, 5.371 s	0.186	737
Isoelemicin	5.8	193.08	XIC(193.08Â±500ppm)	2382799	486	514	40.503 min, 3.615 s	0.122	737
2-Naphthalenol, 3-methoxy-	1.77	131.05	XIC(131.05Â±500ppm)	7332721	967	728	40.6696 min, 4.566 s	0.154	888
2,6-Dimethoxyhydroquinone	1.2	170.05	XIC(170.05Â±500ppm)	58834411	3212	4843	40.6696 min, 4.840 s	0.162	723
Propiophenone, 3',4'-dimethoxy-	1.33	165.05	XIC(165.05Â±500ppm)	3488625	838	385	40.753 min, 4.123 s	0.137	828
Tridecanoic acid	1.16	60.03	XIC(60.03Â±500ppm)	470916	109	69	40.8363 min, 2.373 s	0.077	760
2(3H)-Naphthalenone, 4,4a,5,6-tetrahydro-7-methyl-	1.03	162.06	XIC(162.06Â±500ppm)	4943001	265	823	40.9197 min, 4.839 s	0.149	723
7-Hydroxy-1-indanone	1.25	148.05	XIC(148.05Â±500ppm)	3136139	473	524	41.0863 min, 5.185 s	0.173	754
(E)-4-(3-Hydroxyprop-1-en-1-yl)-2-methoxyphenol	1.04	137.06	XIC(137.06Â±500ppm)	37534259	1787	3093	41.1697 min, 4.345 s	0.138	900
8-Pentadecanone	1.31	57.08	XIC(57.08Â±500ppm)	983618	159	146	41.253 min, 2.282 s	0.075	888
2-Allyl-1,4-dimethoxy-3-methyl-benzene	1.36	192.07	XIC(192.07Â±500ppm)	27697898	1423	2632	41.3364 min, 4.346 s	0.141	741
5-tert-Butylpyrogallol	1.09	167.03	XIC(167.03Â±500ppm)	31756415	963	2616	41.3364 min, 4.695 s	0.143	740
Methyl 3-(4-hydroxy-3-methoxyphenyl)propanoate	3.12	137.06	XIC(137.06Â±500ppm)	11148793	648	1092	41.5864 min, 3.904 s	0.13	788
Ethanone, 1-(3,4,5-trimethoxyphenyl)-	1.32	195.06	XIC(195.06Â±500ppm)	12304386	1620	2030	41.5864 min, 4.129 s	0.141	876
4-Propionyloxytridecane	1.11	57.05	XIC(57.05Â±500ppm)	26666864	838	1857	41.5864 min, 4.419 s	0.141	708
Oxalic acid, allyl tetradecyl ester	0.8	55.07	XIC(55.07Â±500ppm)	940914	131	78	41.7531 min, 1.960 s	0.155	767
9H-Fluorene, 4-methyl-	1.37	165.07	XIC(165.07Â±500ppm)	1456261	188	362	41.8364 min, 3.999 s	0.15	801
2H-1-Benzopyran-2-one, 8-methoxy-	1.43	176.04	XIC(176.04Â±500ppm)	5611846	898	624	41.9197 min, 5.359 s	0.185	824
Phenylacetylformic acid, 4-hydroxy-3-methoxy-	2.17	137.06	XIC(137.06Â±500ppm)	4413442	327	596	42.0031 min, 3.885 s	0.132	728
Allylescaline	1.19	167.07	XIC(167.07Â±500ppm)	5391943	1360	914	42.1698 min, 3.584 s	0.116	776
11-Oxatetracyclo[5.3.2.0(2,7).0(2,8)]dodecan-9-one	1.29	178.06	XIC(178.06Â±500ppm)	11058961	1438	961	42.2531 min, 5.496 s	0.183	755
3-Hydroxybiphenyl	1.28	170.07	XIC(170.07Â±500ppm)	11437706	982	1490	42.3364 min, 4.348 s	0.141	852
2-Dibenzofuranol	1.1	184.06	XIC(184.06Â±500ppm)	2531429	304	684	42.5031 min, 4.727 s	0.173	727
1,4-diazabicyclo[4.3.0]nonan-2,5-dione, 3-methyl	1.46	70.07	XIC(70.07Â±500ppm)	5142595	221	501	42.5031 min, 6.180 s	0.211	834
Syringylacetone	1.29	167.07	XIC(167.07Â±500ppm)	4659593	735	523	42.5865 min, 3.391 s	0.113	776
p-Hydroxybiphenyl	1.24	170.07	XIC(170.07Â±500ppm)	7790732	1053	1234	42.5865 min, 4.440 s	0.142	715
1-Naphthol, 6,7-dimethyl-	1.34	172.08	XIC(172.08Â±500ppm)	11175851	908	1542	42.6698 min, 4.157 s	0.146	765
Benzaldehyde, 2-hydroxy-3-(2-propenyl)-	1.51	162.06	XIC(162.06Â±500ppm)	7076954	744	840	42.6698 min, 4.820 s	0.164	744
Benzaldehyde, 4-ethoxy-	1.67	121.03	XIC(121.03Â±500ppm)	11383006	1754	1227	42.6698 min, 4.968 s	0.173	718
Ethanol, 2-(dodecyloxy)-	0.77	57.08	XIC(57.08Â±500ppm)	976757	124	120	42.8365 min, 2.383 s	0.075	852
Benzofuran, 3-methyl-2-(1-methylethenyl)-	1.29	172.08	XIC(172.08Â±500ppm)	4085133	275	656	42.9198 min, 4.306 s	0.17	750
3,5-Dimethoxycinnamic acid	1.26	208.11	XIC(208.11Â±500ppm)	3908370	873	988	43.0032 min, 3.615 s	0.119	736
3,4,5-trimethoxyphenyl-2-propanone	1.24	181.08	XIC(181.08Â±500ppm)	9658171	1162	1438	43.0032 min, 4.064 s	0.142	832
Caryophyllene oxide	1.11	43.04	XIC(43.04Â±500ppm)	5569798	578	198	43.0865 min, 3.447 s	0.129	743
Benzoic acid, 3,4,5-trimethoxy-, methyl ester	1.27	226.08	XIC(226.08Â±500ppm)	3546002	518	1458	43.0865 min, 3.916 s	0.132	793
2-Propanone, 1-hydroxy-3-(4-hydroxy-3-methoxyphenyl)-	1.17	137.05	XIC(137.05Â±500ppm)	16541471	1773	1351	43.0865 min, 4.568 s	0.146	792
9H-Fluoren-9-one	1.52	180.05	XIC(180.05Â±500ppm)	35185444	1691	2738	43.2532 min, 4.764 s	0.16	937
Coniferyl aldehyde	1.58	178.06	XIC(178.06Â±500ppm)	119606126	2540	4431	43.3365 min, 4.511 s	0.163	889
Phthalic acid, ethyl hept-4-yl ester	1.36	149.02	XIC(149.02Â±500ppm)	1743307	371	219	43.5032 min, 3.424 s	0.131	767
ÃŸ-(4-Hydroxy-3-methoxyphenyl)propionic acid	1.07	137.06	XIC(137.06Â±500ppm)	12561500	918	756	43.5032 min, 3.967 s	0.126	818
4-((1E)-3-Hydroxy-1-propenyl)-2-methoxyphenol	1.17	137.06	XIC(137.06Â±500ppm)	129160372	6770	6197	43.5032 min, 4.384 s	0.169	796
Benzene, 1,2,3-trimethoxy-5-(2-propenyl)-	1.26	208.11	XIC(208.11Â±500ppm)	5966090	501	1141	43.6699 min, 3.638 s	0.127	711
Naphtho[2,1-b]thiophene	2.35	184.03	XIC(184.04Â±500ppm)	1030808	103	386	43.7532 min, 4.618 s	0.143	NA
3,4-Dimethoxybenzaldehyde oxime	1.47	181.08	XIC(181.08Â±500ppm)	31727707	1654	1780	43.9199 min, 4.077 s	0.132	706
3-Methoxycinnamic acid	1.8	178.06	XIC(178.06Â±500ppm)	3577350	524	525	44.0032 min, 5.023 s	0.173	704
4H-1-Benzopyran-4-one, 6-hydroxy-2-methyl-	1.36	136.01	XIC(136.01Â±500ppm)	4290878	261	535	44.0032 min, 5.169 s	0.177	781
Phenethanamine, N-acetyl-3-hydroxy-4-methoxy-	2.6	43.03	XIC(43.03Â±500ppm)	2489985	261	156	44.0866 min, 3.918 s	0.136	712
Pyrrolo[1,2-a]pyrazine-1,4-dione, hexahydro-	1.55	41.05	XIC(41.05Â±500ppm)	2648422	175	139	44.1699 min, 1.828 s	0.221	869
2,5-Dimethoxy-ÃŸ-nitrostyrene	1.08	209.06	XIC(209.06Â±500ppm)	3976838	1164	1368	44.1699 min, 3.653 s	0.112	742
5,6,7,8-Tetrahydro-2-methyl-1,4-naphthoquinone	0.49	176.08	XIC(176.08Â±500ppm)	2826992	387	610	44.1699 min, 4.671 s	0.161	714
Ethanone, 1-[5-(2-furanylmethyl)-2-furanyl]-	1.57	190.06	XIC(190.06Â±500ppm)	2479489	380	638	44.2533 min, 4.754 s	0.167	723
Drim-7-en-11-ol	1.21	109.1	XIC(109.10Â±500ppm)	8184582	1251	817	44.4199 min, 3.342 s	0.117	909
Benzoic acid, 3,4,5-trimethoxy-	1.34	212.06	XIC(212.06Â±500ppm)	1405499	401	565	44.5866 min, 3.964 s	0.127	749
Naphthalene, 2,3-dimethoxy-	0.98	188.08	XIC(188.08Â±500ppm)	5556609	400	365	44.5866 min, 4.181 s	0.145	738
Phenol, 2-methoxy-5-(1-propenyl)-, (E)-	1.36	137.06	XIC(137.06Â±500ppm)	8401365	1218	707	44.7533 min, 3.637 s	0.122	741
1-(2,4,5-Trimethoxyphenyl)propan-1-one	2.07	195.06	XIC(195.06Â±500ppm)	6701116	1243	1316	44.8366 min, 3.758 s	0.135	714
Benzoic acid, 4-hydroxy-3,5-dimethoxy-, hydrazide	3.75	181.05	XIC(181.05Â±500ppm)	69864788	2368	2903	44.8366 min, 4.194 s	0.137	752
9H-Fluorene, 9-methylene-	1.28	178.07	XIC(178.08Â±500ppm)	15450908	1462	2307	45.0033 min, 4.562 s	0.149	949
Phthalic acid, ethyl 2-pentyl ester	1.45	149.02	XIC(149.02Â±500ppm)	3736031	1024	624	45.0867 min, 3.430 s	0.121	857
3,5-Dimethoxy-4-hydroxybenzeneethanol	0.71	167.07	XIC(167.07Â±500ppm)	33423175	905	970	45.0867 min, 4.355 s	0.133	817
1-Phenanthrenol	1.56	194.07	XIC(194.07Â±500ppm)	1627591	388	280	45.17 min, 4.040 s	0.14	736
2-Undecene, 3-methyl-, (Z)-	0.54	70.08	XIC(70.08Â±500ppm)	1372477	233	224	45.3367 min, 1.908 s	0.058	805
Phenol, 2-(phenylmethyl)-	1.58	184.08	XIC(184.08Â±500ppm)	2438447	534	654	45.3367 min, 4.164 s	0.134	724
2-Methylthio-5-nitro anisole	1.16	199.04	XIC(199.04Â±500ppm)	20626337	2989	3147	45.5034 min, 4.511 s	0.145	719
2H-1-Benzopyran-2-one, 3,5,7-trihydroxy-	1.22	194.05	XIC(194.05Â±500ppm)	8302626	1230	1051	45.8367 min, 5.218 s	0.167	742
Cyclo(L-prolyl-L-valine)	0.63	70.07	XIC(70.07Â±500ppm)	4895540	519	505	46.0034 min, 5.144 s	0.171	851
Naphtho[2,3-b]furan-4,9-dione	1.3	198.03	XIC(198.03Â±500ppm)	2412277	543	600	46.0867 min, 5.283 s	0.173	813
Benzen, 2-acetate-1,3-dimethoxy-5-(1-propenyl)-	1.23	194.09	XIC(194.09Â±500ppm)	17691835	1457	2315	46.1701 min, 3.717 s	0.124	865
3-Buten-2-one, 4-(4-hydroxy-3-methoxyphenyl)-	1.8	177.05	XIC(177.05Â±500ppm)	3057695	315	567	46.1701 min, 4.152 s	0.147	762
Anthrone	1.15	194.07	XIC(194.07Â±500ppm)	3883347	202	579	46.1701 min, 4.388 s	0.14	767
3-Hydroxy-4,5-dimethoxybenzoic acid	1.13	198.05	XIC(198.05Â±500ppm)	42996165	1070	3118	46.2534 min, 4.296 s	0.136	882
Bis(3-chloro-1-propyl)(1-chloro-2-propyl)phosphate	1.96	41.05	XIC(41.05Â±500ppm)	2321324	284	147	46.3368 min, 3.324 s	0.163	785
2H-1-Benzopyran-2-one, 6-hydroxy-	1.29	134.04	XIC(134.04Â±500ppm)	4906859	556	567	46.3368 min, 5.454 s	0.173	897
trans-Sinapyl alcohol	1.17	167.07	XIC(167.07Â±500ppm)	40017711	1707	2308	46.4201 min, 4.263 s	0.136	797
1,4,5,7-Tetramethyl-furo[3,4-d]pyridazine	1.9	176.08	XIC(176.08Â±500ppm)	3737033	431	594	46.4201 min, 4.615 s	0.164	763
Phthalic acid, isobutyl propyl ester	1.45	149.02	XIC(149.02Â±500ppm)	3325862	1190	593	46.5034 min, 3.232 s	0.115	867
1,5-Naphthalenediol	1.12	160.05	XIC(160.05Â±500ppm)	1674862	362	361	46.5034 min, 5.030 s	0.164	721
1-Propanone, 1-(4-hydroxy-3,5-dimethoxyphenyl)-	1.51	181.04	XIC(181.04Â±500ppm)	288086502	5987	7728	46.5868 min, 4.070 s	0.166	872
Butylsyringone	0.91	181.04	XIC(181.04Â±500ppm)	104108715	574	3087	46.6701 min, 4.094 s	0.132	828
9H-Carbazole-9-methanol	1.15	167.07	XIC(167.08Â±500ppm)	28873057	2261	1770	46.7535 min, 4.998 s	0.157	865
2-Propenoic acid, 3-(4-hydroxy-3-methoxyphenyl)-, methyl ester	1.3	208.07	XIC(208.07Â±500ppm)	1397301	303	358	47.0035 min, 3.932 s	0.13	767
1-Naphthol, 2,5,8-trimethyl-	1.33	186.1	XIC(186.10Â±500ppm)	1168739	206	347	47.0868 min, 4.048 s	0.159	736
8-Phenyloctanoic acid	1.12	91.05	XIC(91.05Â±500ppm)	802726	149	102	47.1702 min, 3.077 s	0.093	767
3-(N,N-Dimethylamino)carbazole	2.05	210.1	XIC(210.10Â±500ppm)	550933	182	197	47.3368 min, 3.457 s	0.116	715
Xanthone	1.89	196.05	XIC(196.05Â±500ppm)	4037895	522	765	47.4202 min, 4.692 s	0.163	751
a-D-Galactopyranoside, methyl 2-(acetylamino)-2-deoxy-	1.09	59.05	XIC(59.05Â±500ppm)	26541733	1948	2682	47.4202 min, 5.331 s	0.167	718
1H-Indene, 1-(phenylmethylene)-	1.54	204.09	XIC(204.09Â±500ppm)	2107055	313	435	47.5035 min, 4.181 s	0.143	903
[1,1'-Biphenyl]-2,2'-diol	1.17	186.06	XIC(186.06Â±500ppm)	1024374	246	326	47.5869 min, 4.575 s	0.149	717
3,5-Dimethoxy-4-hydroxycinnamaldehyde	1.49	165.06	XIC(165.06Â±500ppm)	1955165	690	390	47.7535 min, 4.405 s	0.151	707
2,3-Dihydro-1-oxo-1H-phenalene	1.33	153.07	XIC(153.07Â±500ppm)	1136133	280	171	47.9202 min, 5.123 s	0.175	820
Phthalic acid, butyl isoporpyl ester	0.68	149.02	XIC(149.02Â±500ppm)	6131464	242	765	48.0869 min, 3.231 s	0.084	843
trans-Coniferyl acetate	3.02	43.03	XIC(43.03Â±500ppm)	3514346	126	182	48.1702 min, 3.748 s	0.125	752
2-Fluorenecarboxaldehyde	1.57	165.07	XIC(165.07Â±500ppm)	3272335	491	588	48.3369 min, 4.527 s	0.153	863
1,4-Naphthalenedione, 2,3-dimethyl-	1.32	157.07	XIC(157.07Â±500ppm)	2564366	513	398	48.4203 min, 5.485 s	0.185	750
Heptyl tiglate, 4-	0.98	83.05	XIC(83.05Â±500ppm)	3507490	391	596	48.5036 min, 4.122 s	0.131	717
2-Hydroxyfluorene	1.17	182.07	XIC(182.07Â±500ppm)	2997328	929	769	48.5036 min, 4.562 s	0.144	787
Anthracene, 2-methyl-	1.31	192.09	XIC(192.09Â±500ppm)	6735425	906	1317	48.5869 min, 4.178 s	0.133	889
1H-Phenalen-1-one	1.36	152.07	XIC(152.07Â±500ppm)	9865862	1325	1075	48.6703 min, 5.451 s	0.181	914
Phthalic acid, 2-pentyl 2-propyl ester	1.21	149.02	XIC(149.02Â±500ppm)	1444421	422	350	48.7536 min, 3.078 s	0.108	854
5-(3-Hydroxypropyl)-2,3-dimethoxyphenol	1.14	168.07	XIC(168.07Â±500ppm)	84004250	3052	4406	48.837 min, 4.077 s	0.14	855
7,8-Dimethoxy-4-methylcoumarin	1.25	220.07	XIC(220.07Â±500ppm)	7659598	735	1440	49.0036 min, 3.976 s	0.123	735
4H-Cyclopenta[def]phenanthrene	1.09	190.07	XIC(190.07Â±500ppm)	7257242	659	1160	49.1703 min, 4.547 s	0.149	846
Pyrrolo[1,2-a]pyrazine-1,4-dione, hexahydro-3-(2-methylpropyl)-	1.24	70.07	XIC(70.07Â±500ppm)	3244548	312	315	49.1703 min, 4.747 s	0.163	766
Bicyclo[2.2.1]heptane, 1,3,3-trimethyl-	1.08	81.04	XIC(81.04Â±500ppm)	764588	184	163	49.2537 min, 2.129 s	0.064	745
1,2-Benzenedicarboxylic acid, butyl 2-methylpropyl ester	1.59	149.02	XIC(149.02Â±500ppm)	399085763	5508	9319	49.587 min, 3.063 s	0.115	932
Danielone	1.17	181.05	XIC(181.05Â±500ppm)	5412594	240	893	49.6704 min, 4.347 s	0.128	781
Phthalic acid, hex-3-yl isobutyl ester	2.05	149.02	XIC(149.02Â±500ppm)	12689530	806	1074	49.837 min, 2.947 s	0.106	840
Norharmane, N-methyl-	1.75	182.08	XIC(182.08Â±500ppm)	3409321	334	382	49.9204 min, 4.994 s	0.174	813
Asarone	1.32	208.07	XIC(208.07Â±500ppm)	3374000	486	839	50.0037 min, 4.769 s	0.185	736
4-Cyclopentene-1,3-dione, 2-methyl-4-phenyl-	1.17	186.06	XIC(186.06Â±500ppm)	1165636	178	278	50.0037 min, 5.425 s	0.153	779
5,10-Diethoxy-2,3,7,8-tetrahydro-1H,6H-dipyrrolo[1,2-a:1',2'-d]pyrazine	1.84	70.07	XIC(70.07Â±500ppm)	29169837	2133	2122	50.0871 min, 5.768 s	0.191	824
Benzeneacetic acid, 2-propenyl ester	1.19	91.05	XIC(91.05Â±500ppm)	3109318	481	263	50.1704 min, 5.205 s	0.174	762
Phthalic acid, isobutyl 2-pentyl ester	1.37	149.02	XIC(149.02Â±500ppm)	98820841	5435	5664	50.2537 min, 2.918 s	0.108	886
9H-Carbazole, 9-methyl-	1.18	181.08	XIC(181.08Â±500ppm)	2131055	602	398	50.2537 min, 4.596 s	0.148	729
Hexadecenoic acid, Z-11-	1.15	55.07	XIC(55.07Â±500ppm)	4795923	318	279	50.3371 min, 2.313 s	0.074	881
4-Hydroxy-9-fluorenone	1.93	196.05	XIC(196.05Â±500ppm)	5645319	518	864	50.3371 min, 4.923 s	0.173	790
1,2,3,4,5,6,7,8-Octahydro-1-methylphenanthrene	1.19	185.06	XIC(185.06Â±500ppm)	1262115	218	389	50.4204 min, 4.812 s	0.16	723
p-tert-Octylresorcinol	1.72	151.04	XIC(151.04Â±500ppm)	2303552	389	514	50.6704 min, 4.274 s	0.139	702
2-Fluorenamine	1.13	181.08	XIC(181.08Â±500ppm)	1806948	451	343	50.8371 min, 4.808 s	0.156	795
Quinolin-8-amine, 5,6-dimethoxy-4-methyl-	1.04	203.07	XIC(203.07Â±500ppm)	8417933	662	1507	50.9205 min, 3.991 s	0.128	713
9,10-Anthracenedione	1.4	180.06	XIC(180.06Â±500ppm)	3609531	497	557	50.9205 min, 4.869 s	0.17	888
Benzeneacetic acid, 4-hydroxy-3,5-dimethoxy-, methyl ester	1.12	167.07	XIC(167.07Â±500ppm)	26685896	1888	1954	51.1705 min, 4.334 s	0.133	822
Phthalic acid, isobutyl 4-methylpent-2-yl ester	2.56	149.02	XIC(149.02Â±500ppm)	2928232	403	329	51.4205 min, 2.804 s	0.098	875
trans-Sinapaldehyde	2.26	208.07	XIC(208.07Â±500ppm)	242658457	2508	7186	51.6705 min, 4.210 s	0.17	873
Phthalic acid, butyl 2-pentyl ester	2.01	149.02	XIC(149.02Â±500ppm)	320133058	6401	9038	51.7539 min, 2.930 s	0.12	910
Hexadecanoic acid, 2-oxo-, methyl ester	1.14	57.08	XIC(57.08Â±500ppm)	796666	155	84	51.9205 min, 2.360 s	0.072	793
Phthalic acid, di(2-methylbutyl) ester	1.47	149.02	XIC(149.02Â±500ppm)	5373142	916	576	52.0039 min, 2.831 s	0.106	871
cis-Sinapyl alcohol	0.63	167.07	XIC(167.07Â±500ppm)	1031727	106	213	52.3372 min, 4.045 s	0.221	739
Phthalic acid, bis(2-pentyl) ester	1.35	149.02	XIC(149.02Â±500ppm)	33087333	2137	3066	52.4206 min, 2.796 s	0.1	858
Phenanthrene, 3,6-dimethyl-	1.75	206.11	XIC(206.11Â±500ppm)	1636911	309	399	52.4206 min, 3.892 s	0.13	794
Naphtho[2,1-b]furan, 1,2-dimethyl-	1.1	196.08	XIC(196.08Â±500ppm)	5738482	354	904	52.4206 min, 4.287 s	0.143	742
Benzo[c]cinnoline, 4-methyl-	0.17	165.07	XIC(165.07Â±500ppm)	989838	122	142	52.4206 min, 4.921 s	0.183	791
Diamyl phthalate	1.33	149.02	XIC(149.02Â±500ppm)	40304699	2352	2460	52.5873 min, 2.920 s	0.099	894
Phthalic acid, butyl 3-methylbutyl ester	1.34	149.02	XIC(149.02Â±500ppm)	41076462	2395	2740	52.7539 min, 2.945 s	0.102	890
Naphthalic anhydride	1.32	154.05	XIC(154.05Â±500ppm)	1901591	622	340	52.9206 min, 5.515 s	0.185	925
Pyrene, 4,5-dihydro-	1.09	204.09	XIC(204.09Â±500ppm)	1688638	240	411	53.004 min, 4.203 s	0.14	705
Heptadecanoic acid, methyl ester	0.98	74.04	XIC(74.04Â±500ppm)	415512	109	95	53.0873 min, 2.058 s	0.058	813
Cyclopenta(def)phenanthrenone	1.5	204.05	XIC(204.05Â±500ppm)	5241681	567	871	53.254 min, 4.784 s	0.159	867
Acephenanthrylene, 4,5-dihydro-	0.72	204.08	XIC(204.08Â±500ppm)	815222	119	289	53.4207 min, 4.269 s	0.139	727
Phenanthrene, 2,3-dimethyl-	1.7	206.1	XIC(206.10Â±500ppm)	770066	156	206	53.504 min, 3.985 s	0.148	772
Phthalic acid, 4-methylpent-2-yl nonyl ester	2.03	149.02	XIC(149.02Â±500ppm)	658413	171	173	53.5873 min, 2.689 s	0.094	729
9,10-Dimethylanthracene	1.45	206.1	XIC(206.10Â±500ppm)	777258	173	239	53.6707 min, 4.071 s	0.156	732
Fluoranthene	1.51	202.07	XIC(202.08Â±500ppm)	54539514	2143	3512	53.6707 min, 4.517 s	0.148	960
ÃŸ-Hydroxypropiosyringone	1.26	181.05	XIC(181.05Â±500ppm)	2154834	281	453	54.004 min, 4.326 s	0.135	710
Dibenz[b,e]oxepin-11(6H)-one	1.93	210.06	XIC(210.06Â±500ppm)	1795720	283	499	54.2541 min, 4.451 s	0.182	765
1,1'-Biphenyl, 5-hydroxy-3,4'-dimethoxy-	1.23	230.09	XIC(230.09Â±500ppm)	18928464	5009	2153	54.4207 min, 3.971 s	0.126	726
Allyl undecanoate	1.25	41.06	XIC(41.06Â±500ppm)	1375526	420	136	54.6708 min, 2.042 s	0.062	786
Phthalic acid, pentyl 2-pentyl ester	1.15	149.02	XIC(149.02Â±500ppm)	15093494	2105	2010	54.6708 min, 2.791 s	0.094	892
Sinapic acid methyl ester	1.2	238.08	XIC(238.08Â±500ppm)	1355873	369	654	54.9208 min, 3.737 s	0.117	794
9-Cyanophenanthrene	2.19	203.07	XIC(203.07Â±500ppm)	959080	173	287	55.0041 min, 4.658 s	0.168	737
9,12-Octadecadienoic acid, methyl ester	1.16	67.06	XIC(67.06Â±500ppm)	923851	226	180	55.1708 min, 2.209 s	0.066	894
2H-Cyclohepta[b]furan-2-one, 6-[1-(acetyloxy)-3-oxobutyl]-3,3a,4,7,8,8a-hexahydro-7-methyl-3-methylene-	2.15	43.03	XIC(43.03Â±500ppm)	6958978	386	297	55.2541 min, 3.799 s	0.129	715
Pyrene	1.45	202.07	XIC(202.08Â±500ppm)	51149766	1285	3607	55.2541 min, 4.718 s	0.158	908
Benzo[b]naphtho[2,3-d]furan	2.23	218.07	XIC(218.07Â±500ppm)	8610881	694	1428	55.5042 min, 4.194 s	0.143	829
Dimantine	1.32	58.08	XIC(58.08Â±500ppm)	11427327	3755	2024	55.6708 min, 1.828 s	0.058	904
9-Phenanthrenol	1.09	165.07	XIC(165.07Â±500ppm)	2053113	172	259	55.8375 min, 4.787 s	0.138	730
(-)-Nortrachelogenin	0.9	137.06	XIC(137.06Â±500ppm)	6823334	780	1026	56.0042 min, 5.165 s	0.172	753
9,12-Octadecadienoic acid (Z,Z)-	1.06	67.06	XIC(67.06Â±500ppm)	43483587	3955	3096	56.2542 min, 2.302 s	0.076	930
1,14-Tetradecanediol	1.36	55.07	XIC(55.07Â±500ppm)	296314	134	31	56.2542 min, 2.788 s	0.098	804
9,12,15-Octadecatrienoic acid, (Z,Z,Z)-	0.31	79.06	XIC(79.06Â±500ppm)	8597412	834	743	56.4209 min, 2.394 s	0.071	914
Phthalic acid, cyclohexyl 2-pentyl ester	1.22	149.02	XIC(149.02Â±500ppm)	2812969	917	782	56.5042 min, 3.092 s	0.104	819
(Z)-18-Octadec-9-enolide	1.29	55.07	XIC(55.07Â±500ppm)	655890	118	58	56.5876 min, 2.796 s	0.091	856
3,5-Dihydroxy-4'-methoxydiphenyl	1.19	216.07	XIC(216.07Â±500ppm)	1820195	287	630	56.5876 min, 4.284 s	0.132	719
3,4,5-Trimethoxy-B-Nitrostyrene	2.97	41.04	XIC(41.04Â±500ppm)	9526632	2048	443	56.9209 min, 3.843 s	0.154	754
11,14,17-Eicosatrienoic acid, methyl ester	1.09	41.06	XIC(41.06Â±500ppm)	15324489	166	823	57.0876 min, 2.100 s	0.386	729
9,12-Tetradecadien-1-ol, (Z,E)-	0.99	67.06	XIC(67.06Â±500ppm)	3055023	130	337	57.0876 min, 2.196 s	0.072	728
7H-Benzo[c]fluorene	1.45	216.09	XIC(216.09Â±500ppm)	3668333	429	845	57.3376 min, 4.142 s	0.153	858
Benzene, (1-methylpentyl)-	1.18	105.07	XIC(105.07Â±500ppm)	1911193	192	204	57.421 min, 2.637 s	0.085	730
Phenol, 4,4'-(1-methylethylidene)bis-	1.19	213.09	XIC(213.09Â±500ppm)	2804988	325	894	57.421 min, 4.234 s	0.139	774
5-Undecene, 3-methyl-, (Z)-	1.07	70.08	XIC(70.08Â±500ppm)	1229720	305	245	57.921 min, 1.785 s	0.053	841
Propanedinitrile, [(3,4,5-trimethoxyphenyl)methylene]-	1.29	244.11	XIC(244.11Â±500ppm)	3911306	976	1170	57.921 min, 3.708 s	0.115	737
Pyrene, 1-methyl-	1.31	216.09	XIC(216.09Â±500ppm)	5212362	434	1074	58.0877 min, 4.283 s	0.165	890
6,7-Dimethoxy-4-ethylcoumarin	1.15	234.09	XIC(234.09Â±500ppm)	9009350	2349	1324	58.3377 min, 4.482 s	0.14	750
Eicosane, 1-iodo-	1.77	57.08	XIC(57.08Â±500ppm)	645959	129	141	58.8378 min, 1.700 s	0.056	834
10(E),12(Z)-Conjugated linoleic acid	1.09	67.06	XIC(67.06Â±500ppm)	903475	169	146	58.8378 min, 2.294 s	0.068	866
Benzo[c]cinnoline, 4,7-dimethyl-	1.13	208.08	XIC(208.08Â±500ppm)	534086	105	182	59.0878 min, 4.424 s	0.14	786
Pyrene, 2-methyl-	1.4	216.09	XIC(216.09Â±500ppm)	4116411	678	964	59.4211 min, 4.465 s	0.148	863
Pentadec-7-ene, 7-bromomethyl-	3.2	41.06	XIC(41.06Â±500ppm)	1500434	209	169	59.6712 min, 2.063 s	0.063	780
Hexadecanoic acid, 2-hydroxy-1-(hydroxymethyl)ethyl ester	1.13	43.06	XIC(43.06Â±500ppm)	1222315	466	131	59.6712 min, 2.205 s	0.065	763
Ethylene diacrylate	1.71	41.06	XIC(41.06Â±500ppm)	1442431	136	105	60.4212 min, 1.795 s	0.094	723
Octadecanoic acid, 2-propenyl ester	0.35	41.06	XIC(41.06Â±500ppm)	606675	186	69	60.4212 min, 1.961 s	0.058	800
(E)-3,3'-Dimethoxy-4,4'-dihydroxystilbene	1.11	272.1	XIC(272.10Â±500ppm)	5585975	1101	2008	60.8379 min, 3.971 s	0.121	864
Glycidyl palmitate	1.07	57.07	XIC(57.07Â±500ppm)	510124	168	86	60.9213 min, 2.206 s	0.069	835
13-Octadecenal, (Z)-	1.2	83.04	XIC(83.04Â±500ppm)	2574147	483	480	61.338 min, 2.429 s	0.072	775
Pyrrolo[1,2-a]pyrazine-1,4-dione, hexahydro-3-(phenylmethyl)-	1.1	125.07	XIC(125.07Â±500ppm)	1650987	581	493	61.5046 min, 5.144 s	0.157	848
Eicosanoic acid, methyl ester	1.08	74.04	XIC(74.04Â±500ppm)	779890	198	185	61.838 min, 1.932 s	0.055	798
8-Methoxycoumarin-3-carboxylic acid, methyl ester	1.27	234.09	XIC(234.09Â±500ppm)	5234802	978	1289	61.838 min, 4.201 s	0.132	711
7H-Benz[de]anthracen-7-one	1.19	230.07	XIC(230.07Â±500ppm)	924122	214	351	62.0047 min, 4.513 s	0.153	715
Cyclobutanecarboxylic acid, undec-2-enyl ester	1.1	83.04	XIC(83.04Â±500ppm)	1178389	336	332	62.2547 min, 2.388 s	0.07	727
Eicosanoic acid	1.07	43.07	XIC(43.07Â±500ppm)	586373	169	70	62.7547 min, 2.009 s	0.058	812
2-Methyltetracosane	0.93	57.08	XIC(57.08Â±500ppm)	3185272	195	352	63.0048 min, 1.689 s	0.057	826
Benzo[ghi]fluoranthene	1.43	226.07	XIC(226.07Â±500ppm)	2678958	468	596	63.0048 min, 4.527 s	0.149	892
[1,1'-Biphenyl]-4,4'-diol, 3,3'-dimethoxy-	0.92	246.09	XIC(246.09Â±500ppm)	3019676	289	1089	63.5881 min, 4.144 s	0.129	722
11H-Benzo[a]fluoren-11-one	1.47	230.07	XIC(230.07Â±500ppm)	753853	171	267	63.5881 min, 4.516 s	0.143	728
Phenol, 4-[[2-(3,4-dimethoxyphenyl)ethylamino]methyl]-2-methoxy-	1.11	137.06	XIC(137.06Â±500ppm)	9970337	1588	1528	63.9215 min, 3.568 s	0.108	726
9,12-Octadecadienoyl chloride, (Z,Z)-	2.72	43.06	XIC(43.06Â±500ppm)	458567	107	54	64.4215 min, 2.210 s	0.064	823
Benz[a]anthracene	1.91	228.09	XIC(228.10Â±500ppm)	2857206	477	743	64.5882 min, 4.375 s	0.141	888
Benz[a]anthracene:2	1.95	228.09	XIC(228.10Â±500ppm)	4667986	1013	893	64.8382 min, 4.506 s	0.154	919
1H-1,2,3,4-Tetrazole-1,5-diamine, N(1)-[(2-ethoxy-3-methoxyphenyl)methyl]-	1.11	137.06	XIC(137.06Â±500ppm)	8653184	1430	1494	65.5883 min, 3.407 s	0.103	708
(Z)-3-(pentadec-8-en-1-yl)phenol	1.05	108.05	XIC(108.05Â±500ppm)	8778425	2560	1828	65.8383 min, 2.429 s	0.071	916
Phenol, 3-pentadecyl-	1.06	108.05	XIC(108.05Â±500ppm)	29689909	3324	4994	66.0883 min, 2.311 s	0.067	945
Naphtho[2,1,8,7-klmn]xanthene	1.77	242.07	XIC(242.07Â±500ppm)	824945	262	316	66.1717 min, 4.456 s	0.145	765
Pyrolo[3,2-d]pyrimidin-2,4(1H,3H)-dione	0.61	151.04	XIC(151.04Â±500ppm)	1459861	163	415	66.255 min, 3.785 s	0.117	859
Trimethoprim	1.11	290.11	XIC(290.11Â±500ppm)	4751705	1015	2080	66.255 min, 3.832 s	0.117	750
Undecane, 2,10-dimethyl-	4.22	57.08	XIC(57.08Â±500ppm)	691495	179	154	66.9217 min, 1.650 s	0.114	810
3-Phenylpropionic acid, 5-methoxy-2-[2,3-dimethoxyphenyl]-	1.09	316.13	XIC(316.13Â±500ppm)	2304104	649	1453	66.9217 min, 3.584 s	0.11	710
4-(4-Hydroxy-3-methoxystyryl)-2,6-dimethoxyphenol	0.94	302.11	XIC(302.11Â±500ppm)	2396932	355	1320	67.0051 min, 3.904 s	0.121	801
4-Pyridinecarbothioamide, N-(9H-xanthen-9-yl)-	1.15	181.08	XIC(181.08Â±500ppm)	4038184	406	906	67.0884 min, 3.571 s	0.11	753
Tetradecane, 4-ethyl-	1.59	57.08	XIC(57.08Â±500ppm)	1323551	179	173	67.1718 min, 1.648 s	0.06	758
Phenol, 3-hexadecyl-	1.11	108.05	XIC(108.05Â±500ppm)	1006899	381	406	68.6719 min, 2.265 s	0.066	825
Hexadecanoic acid, 2,3-bis(acetyloxy)propyl ester	1.15	43.05	XIC(43.05Â±500ppm)	1622031	296	144	69.1719 min, 2.164 s	0.066	718
Hexadecanoic acid, 2-hydroxy-, methyl ester	1.19	43.07	XIC(43.07Â±500ppm)	432500	193	52	70.2553 min, 1.951 s	0.061	789
3-((4Z,7Z)-Heptadeca-4,7-dien-1-yl)phenol	1.04	108.06	XIC(108.06Â±500ppm)	7380503	2340	1605	70.422 min, 2.432 s	0.072	926
1,3,6,10-Cyclotetradecatetraene, 3,7,11-trimethyl-14-(1-methylethyl)-, [S-(E,Z,E,E)]-	0.98	121.1	XIC(121.10Â±500ppm)	362685	132	111	70.422 min, 3.009 s	0.111	728
3-(3,4-Dimethoxyphenyl)-7-hydroxychromen-2-one	1.17	298.12	XIC(298.12Â±500ppm)	14919602	1008	2733	70.5054 min, 3.540 s	0.105	760
1,8,11,14-Heptadecatetraene, (Z,Z,Z)-	0.28	107.05	XIC(107.05Â±500ppm)	635114	171	196	70.5887 min, 2.525 s	0.071	796
1-Naphthalenepropanol, a-ethenyldecahydro-2-hydroxy-a,2,5,5,8a-pentamethyl-, [1R-[1a(R*),2ÃŸ,4aÃŸ,8aa]]-	0.72	55.07	XIC(55.07Â±500ppm)	681158	217	87	70.9221 min, 2.964 s	0.09	740
(Z)-3-(Heptadec-10-en-1-yl)phenol	1.08	108.05	XIC(108.05Â±500ppm)	109913924	10119	9867	71.0054 min, 2.325 s	0.075	937
Cyclotridecane	1	55.07	XIC(55.07Â±500ppm)	727847	133	95	71.0887 min, 1.674 s	0.066	825
Octadecanoic acid, 2-oxo-, methyl ester	0.13	43.07	XIC(43.07Â±500ppm)	540499	144	63	71.5054 min, 2.017 s	0.058	788
Phenol, 4,4'-methylenebis[2,6-dimethoxy-	1.17	320.13	XIC(320.13Â±500ppm)	12150890	1538	2745	71.8388 min, 3.765 s	0.117	809
Tetracosanoic acid, methyl ester	1.06	74.04	XIC(74.04Â±500ppm)	4379660	851	616	71.9221 min, 1.822 s	0.054	891
Cyclopentadecanone, 4-methyl-	0.97	55.07	XIC(55.07Â±500ppm)	946574	149	113	72.0055 min, 2.293 s	0.08	800
a-Amino-3'-hydroxy-4'-methoxyacetophenone	1.11	151.04	XIC(151.04Â±500ppm)	6762172	693	1274	72.1722 min, 3.699 s	0.114	771
Benzo[k]fluoranthene	1.64	252.09	XIC(252.10Â±500ppm)	1566798	368	486	72.2555 min, 4.392 s	0.142	896
Furane-3-carboxylic acid, 5-tert-butyl-2-(4-tert-butylphenoxymethyl)-	2.39	181.08	XIC(181.08Â±500ppm)	14889254	1830	2797	72.3388 min, 3.514 s	0.107	737
Perylene	1.03	252.09	XIC(252.09Â±500ppm)	1939607	271	521	72.3388 min, 4.482 s	0.179	903
2-Methoxy-5-[2-(2,3,4,5-tetramethoxyphenyl)ethenyl]phenol	1.15	346.15	XIC(346.15Â±500ppm)	4506816	1220	1732	72.4222 min, 3.539 s	0.108	725
Hexacosane, 9-octyl-	1.04	57.09	XIC(57.09Â±500ppm)	6708392	939	681	72.9222 min, 1.634 s	0.049	886
(Z)-5-(Pentadec-8-en-1-yl)benzene-1,3-diol	1.03	124.05	XIC(124.05Â±500ppm)	1309905	553	545	73.1722 min, 2.642 s	0.075	843
1,3-Benzenediol, 5-pentadecyl-	1.1	124.05	XIC(124.05Â±500ppm)	5984865	1776	1700	73.3389 min, 2.516 s	0.072	911
Vanilic acid hydrazide	1.08	151.04	XIC(151.04Â±500ppm)	15230704	1060	2571	73.5889 min, 3.994 s	0.119	781
2-Methoxy-5-[(E)-2-(7-methoxy-2,3-dihydro-1,4-benzodioxin-6-yl)ethenyl]phenol	1.15	314.12	XIC(314.12Â±500ppm)	1902912	590	977	73.7556 min, 3.652 s	0.11	710
Squalene	1.09	69.08	XIC(69.08Â±500ppm)	115663685	11879	7258	74.1723 min, 1.895 s	0.065	932
Pentacosanoic acid, methyl ester	1.03	74.04	XIC(74.04Â±500ppm)	1265315	569	320	74.2557 min, 1.803 s	0.053	823
Androst-4-en-11-ol-3,17-dione, 9-thiocyanato-	1.18	300.14	XIC(300.14Â±500ppm)	2463745	1024	932	74.2557 min, 3.363 s	0.102	761
Benzo[j]fluoranthene	1.39	252.09	XIC(252.11Â±500ppm)	1618116	545	505	74.2557 min, 4.676 s	0.146	934
(E,E,E)-3,7,11,15-Tetramethylhexadeca-1,3,6,10,14-pentaene	2.18	69.08	XIC(69.08Â±500ppm)	694088	130	129	74.6724 min, 1.950 s	0.067	800
3a,5-Cyclo-5a-ergosta-6,8(14).22t-triene	1.16	253.19	XIC(253.19Â±500ppm)	805707	370	350	74.6724 min, 2.396 s	0.074	811
1,1':3',1''-Terphenyl, 5'-phenyl-	1.52	306.14	XIC(306.14Â±500ppm)	1358531	228	624	74.7557 min, 3.785 s	0.118	835
Cholesta-6,22,24-triene, 4,4-dimethyl-	1.07	83.09	XIC(83.09Â±500ppm)	561849	143	152	75.6724 min, 2.262 s	0.075	745
3,4-Divanillyltetrahydrofuran	1.04	137.06	XIC(137.06Â±500ppm)	15564704	1339	2413	75.7558 min, 3.594 s	0.105	846
3-(3,4-Dimethoxyphenyl)-6-hydroxy-4-methylchromen-2-one	1.21	312.1	XIC(312.10Â±500ppm)	1469889	374	675	76.0891 min, 3.790 s	0.113	710
2-Nonadecanone	1.06	43.06	XIC(43.06Â±500ppm)	863530	234	79	76.1725 min, 1.809 s	0.051	842
2,3,7,8-Tetramethoxy-5H-dibenzo[a,d]cyclohepten-10(11H)-one	1.19	328.14	XIC(328.14Â±500ppm)	16456907	1091	3359	76.1725 min, 3.455 s	0.103	761
Thunbergol	1.04	95.08	XIC(95.08Â±500ppm)	566381	172	134	76.2558 min, 2.850 s	0.09	742
Hexacosanoic acid, methyl ester	1.09	74.04	XIC(74.04Â±500ppm)	10782659	4612	1340	76.5058 min, 1.783 s	0.053	885
Oxirane, 2,2-dimethyl-3-(3,7,12,16,20-pentamethyl-3,7,11,15,19-heneicosapentaenyl)-, (all-E)-	3.26	69.08	XIC(69.08Â±500ppm)	1062784	183	198	76.7559 min, 1.988 s	0.078	789
Stigmasta-3,5-diene	1.06	43.07	XIC(43.07Â±500ppm)	2220661	476	167	76.9225 min, 2.269 s	0.069	804
trans-Geranylgeraniol	1.16	69.08	XIC(69.08Â±500ppm)	2758577	213	286	77.0059 min, 1.973 s	0.058	793
3,5-Dimethoxy-4-hydroxyphenethylamine	1.1	168.08	XIC(168.08Â±500ppm)	12139931	1989	2404	77.0892 min, 3.496 s	0.104	724
1,3-Benzenediol, 5-(8Z,11Z)-8,11-heptadecadien-1-yl-	1.06	124.05	XIC(124.05Â±500ppm)	2246075	913	728	77.3392 min, 2.645 s	0.077	886
1,1'-Biphenyl, 4,4'-diisocyanato-3,3'-dimethoxy-	1.1	296.11	XIC(296.11Â±500ppm)	594631	184	370	77.3392 min, 4.047 s	0.114	701
Phenol, 4-[2-(methylamino)ethyl]-	13.02	44	XIC(44.00Â±500ppm)	7928871	107	189	77.6726 min, 6.029 s	0.073	819
Ergost-5-en-3-ol, acetate, (3ÃŸ,24R)-	1.41	43.07	XIC(43.07Â±500ppm)	1620368	221	117	77.7559 min, 2.414 s	0.078	822
Neoergosterol, acetate	0.18	55.07	XIC(55.07Â±500ppm)	288764	223	41	77.7559 min, 2.709 s	0.076	825
1H-Imidazole, 2-undecyl-	1.03	82.05	XIC(82.05Â±500ppm)	1069998	326	261	78.0893 min, 2.288 s	0.066	763
4H-1-Benzopyran-4-one, 3-(3,4-dimethoxyphenyl)-6,7-dimethoxy-	1.23	342.15	XIC(342.15Â±500ppm)	4918138	752	1577	78.0893 min, 3.373 s	0.103	736
Olean-12-en-3-ol, acetate, (3ÃŸ)-	1.22	218.2	XIC(218.20Â±500ppm)	1051202	462	429	78.1726 min, 2.643 s	0.082	846
1,6,10,14,18,22-Tetracosahexaen-3-ol, 2,6,10,15,19,23-hexamethyl-, (all-E)-(Â±)-	1.09	69.08	XIC(69.08Â±500ppm)	1068055	181	173	78.256 min, 2.102 s	0.065	793
5a-Ergost-8(14)-ene	3.86	43.07	XIC(43.07Â±500ppm)	507646	122	50	78.506 min, 2.355 s	0.069	727
Stigmastan-6,22-dien, 3,5-dedihydro-	1.36	55.07	XIC(55.07Â±500ppm)	785261	148	130	78.506 min, 2.483 s	0.069	861
Cyclopentaneundecanoic acid, methyl ester	1.38	55.07	XIC(55.07Â±500ppm)	331100	112	51	78.5893 min, 2.111 s	0.066	730
Heptacosanoic acid, methyl ester	1.17	74.04	XIC(74.04Â±500ppm)	270999	113	73	78.6727 min, 1.836 s	0.052	724
ÃŸ-SITOSTANYL ACETATE	1.17	43.07	XIC(43.07Â±500ppm)	860560	135	69	78.756 min, 2.397 s	0.077	740
?-Tocopherol	1.14	151.08	XIC(151.08Â±500ppm)	3059899	580	714	79.006 min, 2.379 s	0.072	843
24-Norursa-3,12-diene	1.18	218.2	XIC(218.20Â±500ppm)	919091	459	366	79.0894 min, 2.824 s	0.085	817
Cholesta-4,6-dien-3-ol, (3ÃŸ)-	1.11	43.07	XIC(43.07Â±500ppm)	2059920	538	139	79.2561 min, 2.564 s	0.077	797
4-[2-(4,7-Dimethoxy-2H-1,3-benzodioxol-5-yl)ethenyl]-2-methoxyphenol	1.23	330.15	XIC(330.15Â±500ppm)	1561534	565	617	80.0061 min, 3.798 s	0.115	749
9,19-Cycloergost-24(28)-en-3-ol, 4,14-dimethyl-, acetate, (3ÃŸ,4a,5a)-	0.53	69.08	XIC(69.08Â±500ppm)	1836226	196	282	80.1728 min, 2.683 s	0.079	834
?-Gurjunenepoxide-(2)	4.74	55.07	XIC(55.07Â±500ppm)	302245	121	46	80.5062 min, 2.745 s	0.085	705
dl-a-Tocopherol	1.08	165.09	XIC(165.09Â±500ppm)	8995622	2039	1474	80.6728 min, 2.546 s	0.077	919
4,4'-Stilbenediol, 3,3',5,5'-tetramethoxy-	1.37	332.13	XIC(332.13Â±500ppm)	467887	278	284	81.4229 min, 2.646 s	0.081	844
2,3,3',4'-tetramethoxy-5-(3-methoxyprop-1-enly)stilbene	1.22	370.14	XIC(370.14Â±500ppm)	1541310	196	848	81.8396 min, 5.265 s	0.137	706
1,6,10,14-Hexadecatetraen-3-ol, 3,7,11,15-tetramethyl-, (E,E)-	6.27	69.08	XIC(69.08Â±500ppm)	463066	128	88	82.173 min, 3.009 s	0.154	706
Phenol, 4,4'-(tetrahydro-1H,3H-furo[3,4-c]furan-1,4-diyl)bis[2-methoxy-	0.99	151.04	XIC(151.04Â±500ppm)	840412	167	223	82.3396 min, 5.219 s	0.146	784
Campesterol	1.1	43.07	XIC(43.07Â±500ppm)	8447551	587	476	82.423 min, 3.253 s	0.1	911
Ursa-9(11),12-dien-3-one	0.43	55.07	XIC(55.07Â±500ppm)	420986	204	61	82.5063 min, 3.661 s	0.099	711
Neoergosterol	0.2	55.07	XIC(55.07Â±500ppm)	1136336	674	116	82.5897 min, 3.787 s	0.118	853
Stigmasterol	1.08	55.07	XIC(55.07Â±500ppm)	12935210	1136	723	83.0897 min, 3.333 s	0.102	930
Ursa-9(11),12-dien-3-ol	0.24	69.08	XIC(69.08Â±500ppm)	366591	106	63	83.0897 min, 3.803 s	0.112	708
Sulfurous acid, butyl heptadecyl ester	0.91	57.09	XIC(57.09Â±500ppm)	1128841	129	180	83.2564 min, 1.934 s	0.065	864
9,19-Cyclolanostan-3-ol, acetate, (3ÃŸ)-	0.86	55.07	XIC(55.07Â±500ppm)	1070067	145	125	83.2564 min, 3.680 s	0.11	791
Lanosta-8,24-dien-3-one	1.08	69.08	XIC(69.08Â±500ppm)	3605619	486	519	84.0064 min, 3.712 s	0.113	874
ÃŸ-Sitosterol	1.1	43.07	XIC(43.07Â±500ppm)	46253145	3176	1621	84.1731 min, 3.588 s	0.124	926
ÃŸ-Amyrone	1.27	218.2	XIC(218.20Â±500ppm)	43575747	2642	3970	84.3398 min, 4.217 s	0.138	912
Lanosterol	2.18	69.08	XIC(69.08Â±500ppm)	6640729	473	593	84.5898 min, 3.851 s	0.12	830
ÃŸ-Amyrin	1.16	218.2	XIC(218.20Â±500ppm)	58490587	2640	4442	84.7565 min, 4.326 s	0.141	921
4-Campestene-3-one	1.14	124.09	XIC(124.09Â±500ppm)	7684607	1067	1258	85.0065 min, 4.124 s	0.128	854
Stigmastane, 3-oxo-	2.07	43.07	XIC(43.07Â±500ppm)	3066023	221	197	85.1732 min, 3.966 s	0.21	777
Lup-20(29)-en-3-one	0.77	55.07	XIC(55.07Â±500ppm)	2028875	148	220	85.1732 min, 4.111 s	0.126	765
9,19-Cyclolanost-24-en-3-ol, acetate, (3ÃŸ)-	1.14	69.08	XIC(69.08Â±500ppm)	70998465	2453	3604	85.3399 min, 4.177 s	0.142	830
Ergosta-4,6,8(14),22-tetraen-3-one	0.35	69.08	XIC(69.08Â±500ppm)	3212401	173	347	85.4232 min, 4.610 s	0.111	820
ÃŸ-Sitosterol acetate	0.75	43.07	XIC(43.07Â±500ppm)	477041	208	51	85.5066 min, 3.679 s	0.11	900
9,19-Cyclolanost-24-en-3-ol, (3ÃŸ)-	1.17	69.08	XIC(69.08Â±500ppm)	89554655	2292	3767	85.5899 min, 4.256 s	0.145	927
a-Amyrin	1.42	218.2	XIC(218.20Â±500ppm)	61789698	1179	4799	85.6732 min, 4.764 s	0.159	868
Stigmasta-3,5-dien-7-one	1.12	174.1	XIC(174.10Â±500ppm)	2184900	411	704	86.0066 min, 4.422 s	0.136	703
Sulfurous acid, 2-propyl undecyl ester	0.68	57.09	XIC(57.09Â±500ppm)	609285	109	114	86.5066 min, 2.254 s	0.074	852
9,19-Cyclolanost-25-en-3-ol, 24-methyl-, (3ÃŸ,24S)-	2.76	55.07	XIC(55.07Â±500ppm)	1367194	164	109	86.6733 min, 4.486 s	0.237	783
Stigmast-4-en-3-one	1.1	124.09	XIC(124.09Â±500ppm)	47450608	2173	4006	86.7567 min, 4.593 s	0.146	864
Succinic acid, 2-methylpent-3-yl pentafluorophenyl ester	0.64	267.02	XIC(267.02Â±500ppm)	950278	100	408	86.9233 min, 6.113 s	0.061	715
Phenol, 2,6-dimethoxy-4-[tetrahydro-4-(4-hydroxy-3-methoxyphenyl)-1H,3H-furo[3,4-c]furan-1-yl]-	1.1	151.04	XIC(151.04Â±500ppm)	2346111	274	396	87.1734 min, 2.848 s	0.242	724
Lupeol	1.11	95.09	XIC(95.09Â±500ppm)	2826806	367	304	87.34 min, 5.540 s	0.159	833
D:A-Friedooleanan-3-ol, (3a)-	0.16	39.98	XIC(39.98Â±500ppm)	2612123	439	196	87.6734 min, 5.673 s	0.211	726
1,4-Dimethyl-8-isopropylidenetricyclo[5.3.0.0(4,10)]decane	2.42	204.19	XIC(204.19Â±500ppm)	484296	239	237	88.1734 min, 3.906 s	0.128	737
Stigmastane-3,6-dione, (5a)-	1.62	43.07	XIC(43.07Â±500ppm)	3466911	345	212	88.1734 min, 5.384 s	0.212	730
Syringaresinol	1.04	181.05	XIC(181.05Â±500ppm)	12777584	385	1448	91.3404 min, 2.311 s	0.379	829
Benzene, 1,1',1''-[1-(bromomethyl)-2-methoxy-1-ethanyl-2-ylidene]tris-	2.48	197.04	XIC(197.04Â±500ppm)	3778772	140	1072	97.6742 min, 6.143 s	0.064	722

## Sheet: Cocos nucifera (PTFE13)
Name	Tailing.Factor	Base.Mass	Quant.Masses	Area	Peak.S.N	Quant.S.N	R.T...min.	FWHH..s.	Similarity
Ethanamine, 2-methoxy-	12.14	42.04	XIC(42.04Â±500ppm)	399434346	1502	2645	3.66668 min, 1.879 s	0.437	778
Acetaldehyde, methoxy-	0.22	45.06	XIC(45.06Â±500ppm)	29874326	206	797	3.66668 min, 6.282 s	0.077	831
2-Butanol, 3-methyl-, acetate	0.57	43.12	XIC(43.12Â±500ppm)	496398227	440	4881	3.9167 min, 1.691 s	0.2	720
Ethanol, 1-methoxy-, acetate	0.5	43.08	XIC(43.08Â±500ppm)	274691135	574	3196	3.9167 min, 6.500 s	0.111	707
1,3-Dioxolane, 2-hexyl-	1.33	73.08	XIC(73.08Â±500ppm)	163616169	462	3472	4.00004 min, 1.560 s	0.072	812
2-Ethoxy-3-chlorobutane	0.82	45.08	XIC(45.08Â±500ppm)	622684335	1134	5746	4.08338 min, 1.502 s	0.167	723
Isoxazolidine	1.8	73.04	XIC(73.04Â±500ppm)	151932439	759	4990	4.08338 min, 1.524 s	0.101	753
Allophanic acid, phenyl ester	1.31	94.05	XIC(94.05Â±500ppm)	1188011	396	383	4.16672 min, 1.729 s	0.079	713
Ethenamine, N-methylene-	1.36	55.06	XIC(55.06Â±500ppm)	23194394	1021	1377	4.16672 min, 1.880 s	0.107	858
Butanenitrile, 3-methyl-	1.21	43.06	XIC(43.06Â±500ppm)	43885816	1109	582	4.25006 min, 1.936 s	0.112	888
1H-Pyrrole, 1-methyl-	1.18	81.07	XIC(81.07Â±500ppm)	10062301	2197	2160	4.41674 min, 1.967 s	0.103	834
4-Chloro-4-methylhexane-2,3-dione	0.21	43.05	XIC(43.05Â±500ppm)	8208154	359	129	4.50008 min, 1.915 s	0.121	740
1,4-Cyclohexadiene, 1-methyl-	0.84	79.07	XIC(79.07Â±500ppm)	1896008	220	242	4.58342 min, 1.678 s	0.107	773
Pyrrole	1.16	67.06	XIC(67.06Â±500ppm)	48932856	6275	5428	4.7501 min, 2.093 s	0.1	874
Methallyl cyanide	1.28	41.06	XIC(41.06Â±500ppm)	5162798	592	190	5.00012 min, 2.212 s	0.108	887
Cyclohexane, 1,2-dimethyl- (cis/trans)	1.34	55.08	XIC(55.08Â±500ppm)	254431152	19879	12661	5.08346 min, 1.595 s	0.146	877
1,2-Epoxy-3-propyl acetate	0.51	43.04	XIC(43.04Â±500ppm)	30937454	516	610	5.08346 min, 1.774 s	0.114	784
Borane, diethylmethyl-	1.68	55.07	XIC(55.07Â±500ppm)	26380674	1190	2154	5.50016 min, 1.611 s	0.159	744
l-Alanine, N-cyclopropylcarbonyl-, methyl ester	2.5	69.08	XIC(69.08Â±500ppm)	7508556	172	1315	5.50016 min, 1.624 s	0.067	704
Carbonocyanidic acid, ethyl ester	1.25	84.03	XIC(84.03Â±500ppm)	13452822	3576	2625	5.50016 min, 2.772 s	0.13	741
Glyoxal	1.57	58.03	XIC(58.03Â±500ppm)	3523419	278	605	5.50016 min, 6.234 s	0.045	816
Aziridine, 2-ethyl-	1.44	56.08	XIC(56.08Â±500ppm)	7523573	156	711	5.5835 min, 1.577 s	0.048	711
1,5-Octadiene, 7-methyl-3-(1-methylethyl)-	1.8	55.08	XIC(55.08Â±500ppm)	14735228	1546	1402	5.5835 min, 1.586 s	0.124	734
2-Pentene, 3-ethyl-2-methyl-	3.88	41.06	XIC(41.06Â±500ppm)	6519528	511	262	5.91686 min, 1.576 s	0.139	751
2,2-Dimethyl-3-heptanone	7.54	57.08	XIC(57.08Â±500ppm)	5556302	266	568	6.0002 min, 1.532 s	0.095	723
Undecane, 2,4-dimethyl-	2.33	43.09	XIC(43.09Â±500ppm)	13016230	428	493	6.08354 min, 1.553 s	0.109	837
Pyridine, 2-methyl-	2.16	93.06	XIC(93.06Â±500ppm)	2024643	477	422	6.08354 min, 2.355 s	0.155	781
Cyclobutanone, 2,2-dimethyl-	0.5	41.06	XIC(41.06Â±500ppm)	3540444	191	194	6.4169 min, 1.920 s	0.129	745
1,3-Propanediol, 2-ethyl-2-(hydroxymethyl)-	1.2	41.06	XIC(41.06Â±500ppm)	3063478	377	156	6.50024 min, 1.967 s	0.156	722
2-Cyclopenten-1-one	1.26	82.05	XIC(82.05Â±500ppm)	6229328	1752	1504	6.50024 min, 2.976 s	0.144	846
4-Cyclopentene-1,3-dione	0.74	96.03	XIC(96.03Â±500ppm)	16394209	880	3051	6.66692 min, 2.905 s	0.134	812
1,4-Cyclohexadiene, 1,2-dimethyl-	1.17	93.08	XIC(93.08Â±500ppm)	1610395	335	414	6.75026 min, 1.909 s	0.112	790
Isoamyl cyanide	1.02	55.07	XIC(55.07Â±500ppm)	24925504	1357	1568	6.75026 min, 2.419 s	0.198	717
Maleic anhydride	1.11	54.04	XIC(54.04Â±500ppm)	42943379	2050	3786	7.16696 min, 3.638 s	0.139	973
Propanamide	1.51	44.04	XIC(44.04Â±500ppm)	3379468	279	58	7.33364 min, 3.163 s	0.161	706
2,3-Dimethyl-cyclohexa-1,3-diene	1.21	93.08	XIC(93.08Â±500ppm)	1129053	365	308	7.41698 min, 2.008 s	0.118	798
Pyridine, 3-methyl-	2.98	93.06	XIC(93.06Â±500ppm)	3674698	779	718	7.41698 min, 2.677 s	0.164	882
Heptane, 3-ethyl-	1.29	57.09	XIC(57.09Â±500ppm)	5121722	927	1128	7.58366 min, 1.637 s	0.097	853
Pentanoic acid	1.21	60.04	XIC(60.04Â±500ppm)	7781787	723	453	8.0837 min, 2.046 s	0.101	854
o-Xylene	1.16	91.06	XIC(91.06Â±500ppm)	5562785	1326	929	8.33372 min, 2.382 s	0.141	876
Furan, 2,5-diethyltetrahydro-	1.18	81.08	XIC(81.08Â±500ppm)	2112166	511	620	8.5004 min, 2.041 s	0.139	770
Propanamide, 2-methyl-	4.09	44.04	XIC(44.04Â±500ppm)	6251975	320	74	9.00044 min, 3.259 s	0.178	843
Butanoic acid, 4-hydroxy-	1.2	42.07	XIC(42.07Â±500ppm)	18688533	1493	533	9.08378 min, 4.428 s	0.187	952
Pyrrolidine, 1-methyl-	2.91	84.09	XIC(84.09Â±500ppm)	2098265	282	362	9.16712 min, 6.439 s	0.078	819
trans-2-Pentenoic acid	0.84	55.08	XIC(55.08Â±500ppm)	1022474	178	117	9.25046 min, 2.225 s	0.111	713
p-Benzoquinone	1.04	54.04	XIC(54.04Â±500ppm)	42221713	1958	3597	9.25046 min, 3.872 s	0.148	913
3-Heptyne-2,6-dione, 5-methyl-5-(1-methylethyl)-	1.21	43.04	XIC(43.04Â±500ppm)	5121711	745	192	9.3338 min, 2.113 s	0.175	779
2-Cyclopenten-1-one, 2-hydroxy-	2.52	98.04	XIC(98.04Â±500ppm)	4661913	770	1709	9.50048 min, 3.319 s	0.136	876
Bicyclo[3.1.1]hept-2-ene, 3,6,6-trimethyl-	1.25	93.08	XIC(93.08Â±500ppm)	11102106	1678	2190	9.83384 min, 1.997 s	0.17	899
Pyridine, 3,4-dimethyl-	2.83	107.08	XIC(107.08Â±500ppm)	5299373	979	848	9.91718 min, 2.779 s	0.163	858
N-Methylmaleimide	1.16	54.04	XIC(54.04Â±500ppm)	3764968	947	543	10.0005 min, 3.861 s	0.17	906
Benzeneethanamine, N-[(4-hydroxy)hydrocinnamoyl]-	0.18	44.01	XIC(44.01Â±500ppm)	1316621	220	23	10.1672 min, 2.769 s	0.135	726
3-Penten-2-one	0.51	43.04	XIC(43.04Â±500ppm)	3877710	211	158	10.1672 min, 3.583 s	0.139	725
Benzene, 1-methoxy-4-methyl-	1.14	122.08	XIC(122.08Â±500ppm)	2041612	868	1362	10.2505 min, 2.426 s	0.125	829
2,5-Furandione, 3-methyl-	1.08	68.05	XIC(68.05Â±500ppm)	24716477	4594	2885	10.3339 min, 4.001 s	0.155	790
Pentanoic acid, 4-methyl-	4.74	43.05	XIC(43.05Â±500ppm)	387554	110	22	10.5839 min, 2.159 s	0.112	801
1-Hydroxy-2-pentanone	5.01	43.08	XIC(43.08Â±500ppm)	3786257	493	161	11.0839 min, 3.053 s	0.177	710
Acetic acid, 2-(dimethylamino)ethyl ester	1.47	58.09	XIC(58.09Â±500ppm)	15428868	1220	1212	11.1673 min, 2.168 s	0.119	952
2-Cyclopenten-1-one, 3-methyl-	1.31	96.07	XIC(96.07Â±500ppm)	4659674	615	772	11.1673 min, 3.694 s	0.162	813
4-Octanone	1.44	71.06	XIC(71.06Â±500ppm)	7381707	704	898	11.5006 min, 2.329 s	0.149	789
4(1H)-Pyrimidinone, 2-methyl-	1.13	110.05	XIC(110.05Â±500ppm)	7346471	1541	1913	11.7507 min, 4.163 s	0.164	724
Benzonitrile	1.14	103.05	XIC(103.05Â±500ppm)	4622351	468	859	12.0007 min, 3.703 s	0.153	779
2-Hydroxy-gamma-butyrolactone	1.13	57.06	XIC(57.06Â±500ppm)	22203210	4442	2705	12.1674 min, 4.825 s	0.182	846
4-Heptanol, 2-methyl-	3.75	55.08	XIC(55.08Â±500ppm)	1745350	274	150	12.2507 min, 2.209 s	0.13	779
2-Furanone, 2,5-dihydro-3,5-dimethyl	1.26	69.05	XIC(69.05Â±500ppm)	2581865	450	420	12.334 min, 3.537 s	0.154	816
2H-Pyran-2,6(3H)-dione	1.07	55.05	XIC(55.05Â±500ppm)	2211831	253	268	12.334 min, 3.804 s	0.135	849
1H-Pyrrole-2,5-dione	1.15	97.02	XIC(97.02Â±500ppm)	7336408	2538	1773	12.334 min, 4.119 s	0.145	950
Benzofuran	1.08	118.05	XIC(118.05Â±500ppm)	6127766	1104	2655	12.4174 min, 3.224 s	0.138	841
1,2-Cyclohexanedione	1.59	55.06	XIC(55.06Â±500ppm)	2890041	373	290	12.5007 min, 3.577 s	0.173	880
Oxazolidine, 2,2-diethyl-3-methyl-	1.07	58.03	XIC(58.03Â±500ppm)	5960371	898	1090	12.5007 min, 3.922 s	0.147	777
Pyridine, 2,4,6-trimethyl-	2.47	121.1	XIC(121.10Â±500ppm)	3559710	642	755	12.5841 min, 2.803 s	0.164	809
But-3-enyl (E)-2-methylbut-2-enoate	1.29	83.05	XIC(83.05Â±500ppm)	3430871	1599	852	12.5841 min, 4.228 s	0.153	761
Butanamide, 3-methyl-	1.34	59.06	XIC(59.06Â±500ppm)	12070296	1298	1599	12.7507 min, 3.485 s	0.163	845
p-Benzoquinone, 2-methyl-	1.07	54.04	XIC(54.04Â±500ppm)	32672832	1743	2783	13.1674 min, 4.001 s	0.151	886
Succinic anhydride	1.05	56.06	XIC(56.06Â±500ppm)	34436021	3444	4091	13.3341 min, 5.970 s	0.206	862
Pyridine, 2-ethyl-6-methyl-	1.13	120.09	XIC(120.09Â±500ppm)	1777499	262	456	13.4175 min, 2.926 s	0.172	730
Benzoxazole	1.67	119.05	XIC(119.05Â±500ppm)	2634192	964	773	13.4175 min, 3.595 s	0.161	833
2,5-Furandione, dihydro-3-methyl-	1.07	42.07	XIC(42.07Â±500ppm)	55149303	3349	1761	13.6675 min, 5.010 s	0.184	906
Pyridine, 2,3,6-trimethyl-	2.44	121.1	XIC(121.10Â±500ppm)	3387011	619	710	13.7508 min, 2.787 s	0.155	820
1,2-Cyclopentanedione, 3-methyl-	1.12	112.06	XIC(112.06Â±500ppm)	10837100	1412	2565	13.7508 min, 3.577 s	0.136	907
Octane, 2,2-dimethyl-	1.69	57.09	XIC(57.09Â±500ppm)	1807123	479	356	13.9175 min, 1.760 s	0.126	844
Phenol, 3-ethyl-5-methyl-	0.98	121.04	XIC(121.04Â±500ppm)	4025240	548	1459	14.0008 min, 3.195 s	0.135	778
Ethanone, 1-(2-pyridinyl)-	1.39	79.05	XIC(79.05Â±500ppm)	5434913	440	625	14.0842 min, 3.621 s	0.17	897
2-Aminopyridine	1.69	67.06	XIC(67.06Â±500ppm)	4878098	493	563	14.2509 min, 3.600 s	0.155	813
3(2H)-Furanone, 4-hydroxy-5-methyl-	2.52	43.04	XIC(43.04Â±500ppm)	17451219	756	590	14.3342 min, 3.643 s	0.156	781
4-Acetoxybenzaldehyde	1.36	43.04	XIC(43.04Â±500ppm)	5945831	136	248	14.5009 min, 3.670 s	0.241	743
Benzeneacetaldehyde	1.15	91.06	XIC(91.06Â±500ppm)	7471126	1337	1064	14.5842 min, 3.764 s	0.151	928
4-Methyl-5H-furan-2-one	1.35	69.05	XIC(69.05Â±500ppm)	7910959	415	914	14.5842 min, 5.047 s	0.188	843
4(1H)-Pyridinone, 2,3-dihydro-1-methyl-	1.58	111.08	XIC(111.08Â±500ppm)	2315349	691	704	15.0009 min, 3.970 s	0.195	758
2-Cyclohexen-1-one, 4-hydroxy-	2.69	55.06	XIC(55.06Â±500ppm)	2514800	394	290	15.0009 min, 4.955 s	0.204	762
2H-Pyran-2-one, tetrahydro-	0.75	42.04	XIC(42.04Â±500ppm)	5840150	184	207	15.0009 min, 5.228 s	0.198	868
Heptane, 5-ethyl-2,2,3-trimethyl-	1.46	57.09	XIC(57.09Â±500ppm)	5259198	494	569	15.0843 min, 1.796 s	0.126	849
2-Cyclopenten-1-one, 2-hydroxy-3,4-dimethyl-	4.72	43.05	XIC(43.05Â±500ppm)	387435	105	24	15.0843 min, 3.239 s	0.123	712
Furaneol	2.69	43.04	XIC(43.04Â±500ppm)	3059417	513	138	15.1676 min, 3.349 s	0.139	798
Benzenamine, 3,5-dimethyl-	2.62	121.1	XIC(121.10Â±500ppm)	907285	275	266	15.2509 min, 3.164 s	0.156	709
Phenol, 2-methyl-	1.19	108.07	XIC(108.07Â±500ppm)	22369279	1764	2734	15.2509 min, 3.201 s	0.133	918
Ethanone, 1-(1H-pyrrol-2-yl)-	0.83	43.04	XIC(43.04Â±500ppm)	5701797	510	307	15.3343 min, 3.960 s	0.174	829
Pentanoic acid, 4-oxo-	0.84	43.04	XIC(43.04Â±500ppm)	235558014	5214	5019	15.4176 min, 3.382 s	0.159	951
(R)-3-Pyrrolidinol	0.51	42.06	XIC(42.06Â±500ppm)	3975612	347	161	15.4176 min, 4.185 s	0.155	707
Decane, 2-methyl-	1.17	57.09	XIC(57.09Â±500ppm)	3189795	372	428	15.5843 min, 1.787 s	0.104	874
Decane, 2,2,9-trimethyl-	1.15	57.09	XIC(57.09Â±500ppm)	1927936	240	278	15.8343 min, 1.803 s	0.119	847
Pyridine, 2-ethyl-4,6-dimethyl-	1.86	134.11	XIC(134.11Â±500ppm)	1186090	143	463	16.001 min, 2.849 s	0.162	769
2-Furancarboxylic acid	1.06	112.03	XIC(112.03Â±500ppm)	20472218	1421	3197	16.001 min, 3.111 s	0.12	878
2-Cyclopenten-1-one, 3-ethyl-	1.53	81.05	XIC(81.05Â±500ppm)	1674280	348	323	16.001 min, 3.850 s	0.161	784
2-Pyrrolidinone	1.39	85.06	XIC(85.06Â±500ppm)	34280653	2880	3898	16.001 min, 4.944 s	0.178	935
Cyclopropane, pentyl-	3.58	43.05	XIC(43.05Â±500ppm)	732172	108	48	16.0843 min, 2.372 s	0.11	797
2(1H)-Pyridinone, 6-hydroxy-	1.27	40.05	XIC(40.05Â±500ppm)	4971862	323	255	16.0843 min, 4.156 s	0.161	724
2-Octen-1-ol, (E)-	1.08	68.04	XIC(68.04Â±500ppm)	2129851	249	291	16.0843 min, 4.394 s	0.217	710
Phenol, 3-methyl-	1.23	107.06	XIC(107.06Â±500ppm)	158717289	4408	5639	16.1677 min, 3.230 s	0.131	952
2,5-Furandicarboxaldehyde	1.18	124.03	XIC(124.03Â±500ppm)	15047094	2665	2963	16.1677 min, 4.801 s	0.165	913
Benzaldehyde, 2-methyl-	1.18	91.06	XIC(91.06Â±500ppm)	5382716	1009	523	16.251 min, 3.701 s	0.145	922
3-Furancarboxylic acid	1.08	112.03	XIC(112.03Â±500ppm)	37940229	1564	3602	16.3344 min, 2.991 s	0.109	875
Benzenamine, 2,5-dimethyl-	3.43	121.1	XIC(121.10Â±500ppm)	3443948	498	599	16.3344 min, 3.085 s	0.14	782
Furyl hydroxymethyl ketone	1.43	95.02	XIC(95.02Â±500ppm)	3535514	636	456	16.3344 min, 4.009 s	0.149	792
2-Pyrimidinamine	1.21	95.06	XIC(95.06Â±500ppm)	3665439	183	557	16.5844 min, 2.960 s	0.131	726
4-Undecene, 4-methyl-, (Z)-	1.94	55.08	XIC(55.08Â±500ppm)	1945928	378	146	16.6677 min, 1.866 s	0.175	728
Phenol, 2-methoxy-	1.06	109.04	XIC(109.04Â±500ppm)	9982245	808	1761	16.6677 min, 3.603 s	0.136	885
2,5-Pyrrolidinedione, 1-methyl-	1.4	113.06	XIC(113.06Â±500ppm)	10197417	1211	2709	16.6677 min, 5.438 s	0.206	922
1,2-Butanediol, 3,3-dimethyl-	1.93	57.06	XIC(57.06Â±500ppm)	2850113	235	377	17.3344 min, 3.983 s	0.143	711
2,5-Cyclohexadiene-1,4-dione, 2,6-dimethyl-	1.07	68.04	XIC(68.04Â±500ppm)	10191289	861	660	17.4178 min, 3.860 s	0.139	840
Benzenemethanol, 4-methyl-	0.32	107.06	XIC(107.06Â±500ppm)	586094	201	141	17.5011 min, 3.396 s	0.139	718
3-Pyridinol	1.42	95.05	XIC(95.05Â±500ppm)	5945057	1781	774	17.5011 min, 3.555 s	0.131	868
2(3H)-Furanone, dihydro-3-methyl-	1.05	56.09	XIC(56.09Â±500ppm)	10378886	1434	971	17.5845 min, 4.815 s	0.17	787
Maltol	0.28	43.04	XIC(43.04Â±500ppm)	9280508	488	286	17.6678 min, 4.117 s	0.154	882
Levoglucosenone	0.98	68.05	XIC(68.05Â±500ppm)	4004131	462	395	17.7511 min, 4.790 s	0.165	864
2-Cyclopenten-1-one, 3-ethyl-2-hydroxy-	5.71	43.04	XIC(43.04Â±500ppm)	6105537	212	230	18.0012 min, 3.565 s	0.162	792
3-Hydroxypyridine monoacetate	1.49	43.04	XIC(43.04Â±500ppm)	55944538	1378	1434	18.0012 min, 3.832 s	0.158	845
1,3-Benzodioxol-2-one	0.98	64.05	XIC(64.05Â±500ppm)	10323486	787	746	18.0012 min, 3.993 s	0.133	851
2,5-Cyclohexadiene-1,4-dione, 2,3-dimethyl-	1.05	54.04	XIC(54.04Â±500ppm)	5413850	558	537	18.0845 min, 3.990 s	0.145	850
2H-Pyran-3(4H)-one, dihydro-6-methyl-	1.06	56.05	XIC(56.05Â±500ppm)	38457829	2649	2560	18.1678 min, 6.482 s	0.221	772
Pentanamide, 4-methyl-	1.35	59.06	XIC(59.06Â±500ppm)	18603614	1557	2074	18.2512 min, 3.594 s	0.141	866
2(3H)-Furanone, 5-acetyldihydro-	1.08	85.04	XIC(85.04Â±500ppm)	17656259	2975	3034	18.5012 min, 5.423 s	0.19	888
Succinimide	0.96	56.05	XIC(56.05Â±500ppm)	83935748	1185	3919	18.5012 min, 5.587 s	0.162	889
2H-Pyrrol-2-one, 1,5-dihydro-5-methoxy-3,5-dimethyl-	3.55	41.05	XIC(41.05Â±500ppm)	1701673	280	76	18.6679 min, 4.182 s	0.142	754
1,2,4-Cyclopentanetrione, 3-methyl-	1.15	126.05	XIC(126.05Â±500ppm)	1267345	394	565	18.7512 min, 3.756 s	0.132	846
3-Pyridinol, 2-methyl-	1.36	109.06	XIC(109.06Â±500ppm)	79926123	1816	4595	18.8346 min, 3.428 s	0.124	893
Benzyl nitrile	1.36	117.07	XIC(117.07Â±500ppm)	1333699	509	496	19.0012 min, 4.441 s	0.154	834
3-Nonen-2-one	1.06	55.06	XIC(55.06Â±500ppm)	1010224	193	124	19.0846 min, 2.730 s	0.102	793
1,4-Benzenedicarbonitrile, 2,3,5,6-tetrafluoro-	1.08	200.05	XIC(200.05Â±500ppm)	531489	347	805	19.0846 min, 2.985 s	0.11	702
Phenol, 2-ethyl-	1.17	107.06	XIC(107.06Â±500ppm)	5482908	1231	1194	19.0846 min, 3.230 s	0.123	891
2-Pyrimidinamine, 4,6-dimethyl-	2.53	123.09	XIC(123.09Â±500ppm)	1675138	886	636	19.1679 min, 3.606 s	0.152	761
3,4-Furandiol, tetrahydro-, trans-	4.07	55.05	XIC(55.05Â±500ppm)	10398448	324	469	19.1679 min, 4.257 s	0.15	709
Glutarimide	1.12	42.07	XIC(42.07Â±500ppm)	30698065	1435	965	19.4179 min, 4.832 s	0.167	912
Phenol, 2,5-dimethyl-	1.16	107.07	XIC(107.07Â±500ppm)	15708983	1349	2117	19.5013 min, 3.292 s	0.122	906
4-Hexen-3-one, 5-methyl-	1.27	83.06	XIC(83.06Â±500ppm)	3651577	579	842	19.5013 min, 4.893 s	0.17	800
Benzonitrile, 2-hydroxy-	1.09	91.06	XIC(91.06Â±500ppm)	3087131	403	381	19.5846 min, 3.889 s	0.132	854
1,4-Dioxaspiro[2.4]heptan-5-one, 7-methyl-	1.08	42.07	XIC(42.07Â±500ppm)	37034050	2021	1343	19.5846 min, 5.667 s	0.197	747
4-Ketopimelic	2.22	57.06	XIC(57.06Â±500ppm)	2742289	370	418	19.668 min, 3.302 s	0.117	710
Benzofuran, 2,3-dihydro-	1.08	91.08	XIC(91.08Â±500ppm)	2597742	485	502	19.8346 min, 3.452 s	0.123	799
4-Acetylbutyric acid	1.04	43.05	XIC(43.05Â±500ppm)	7926926	468	462	19.918 min, 3.367 s	0.117	890
Metacetamol	1.25	109.08	XIC(109.08Â±500ppm)	720707	202	291	20.0013 min, 3.608 s	0.134	710
2,5-Dihydroxybenzaldehyde	1.04	138.07	XIC(138.07Â±500ppm)	1029024	344	1063	20.0847 min, 3.893 s	0.127	861
2(3H)-Furanone, dihydro-4-hydroxy-	1.03	44.06	XIC(44.06Â±500ppm)	31058180	610	601	20.0847 min, 5.538 s	0.166	852
Benzoic acid	0.89	105.06	XIC(105.06Â±500ppm)	20956429	1693	5453	20.2513 min, 3.263 s	0.114	895
2(1H)-Pyridinone	0.77	95.06	XIC(95.06Â±500ppm)	15561922	574	1337	20.2513 min, 4.293 s	0.19	883
Phenol, 2,3-dimethyl-	1.16	107.09	XIC(107.09Â±500ppm)	27037468	1690	4143	20.418 min, 3.294 s	0.119	886
Phenol, 2-ethoxy-	1.07	110.07	XIC(110.07Â±500ppm)	1560659	441	672	20.418 min, 3.982 s	0.136	852
Methyl-a-d-ribofuranoside	0.91	57.07	XIC(57.07Â±500ppm)	236779238	6025	12969	20.418 min, 4.968 s	0.19	750
3-Pyridinol, 6-methyl-	1.28	109.12	XIC(109.12Â±500ppm)	7879805	984	1618	20.668 min, 3.344 s	0.117	899
4H-Pyran-4-one, 3,5-dihydroxy-2-methyl-	1.11	142.1	XIC(142.10Â±500ppm)	544039	292	777	21.0014 min, 3.651 s	0.121	844
1,2-Naphthalenedione	1.13	102.1	XIC(102.10Â±500ppm)	4424677	1856	1963	21.0847 min, 4.317 s	0.152	923
2-Propenal, 3-(4-methylphenyl)-	1.12	131.11	XIC(131.11Â±500ppm)	1415979	659	798	21.2514 min, 3.977 s	0.186	775
2(1H)-Pyridinone, 1,3-dimethyl-	1.58	94.11	XIC(94.11Â±500ppm)	1241081	342	296	21.3348 min, 3.555 s	0.128	860
(S)-(+)-2',3'-Dideoxyribonolactone	0.94	85.06	XIC(85.06Â±500ppm)	127858648	4619	9749	21.3348 min, 5.631 s	0.188	935
D-Fucose	1.06	71.08	XIC(71.08Â±500ppm)	55810655	1347	6212	21.4181 min, 4.413 s	0.15	792
1,4:3,6-Dianhydro-a-d-glucopyranose	0.93	69.07	XIC(69.07Â±500ppm)	2546714	665	431	21.5014 min, 4.883 s	0.191	783
Phenol, 3,4-dimethyl-	1.17	107.08	XIC(107.08Â±500ppm)	6168621	1206	1261	21.5848 min, 3.440 s	0.122	870
Pentanedioic acid, monomethyl ester	6.57	43.05	XIC(43.05Â±500ppm)	1211636	174	99	21.6681 min, 3.184 s	0.121	810
5-Hydroxymethylfurfural	2.12	41.07	XIC(41.07Â±500ppm)	3820767	768	205	21.7515 min, 4.539 s	0.15	732
2-Piperidinone	1.96	99.09	XIC(99.09Â±500ppm)	4699025	923	884	21.7515 min, 4.802 s	0.169	901
Catechol	1.05	110.05	XIC(110.05Â±500ppm)	1847721083	7885	11904	22.0015 min, 3.570 s	0.179	892
2(1H)-Pyridinone, 1-methyl-	2.15	109.06	XIC(109.06Â±500ppm)	6314162	655	704	22.0015 min, 4.934 s	0.186	828
3-Formyl-4,5-dimethyl-pyrrole	1.98	122.07	XIC(122.07Â±500ppm)	7483794	927	811	22.0848 min, 3.467 s	0.136	835
Dianhydromannitol	2.45	86.04	XIC(86.04Â±500ppm)	153050751	1804	7876	22.1682 min, 4.651 s	0.191	717
2-Propenal, 3-(2-furanyl)-	1.35	122.05	XIC(122.05Â±500ppm)	3173611	340	412	22.3348 min, 5.111 s	0.191	707
1,4-Cyclohexadiene-1,2-dicarboxylic anhydride	0.22	78.06	XIC(78.06Â±500ppm)	2148976	217	117	22.5015 min, 3.858 s	0.129	711
Tricyclo[4.2.1.1(2,5)]deca-3,7-diene-9,10-dione, (1a,2ÃŸ,5ÃŸ,6a)-	1.15	131.06	XIC(131.06Â±500ppm)	202049797	15164	12361	22.5849 min, 4.633 s	0.205	872
2,3-Anhydro-d-galactosan	0.7	43.04	XIC(43.04Â±500ppm)	62216419	2691	976	22.5849 min, 5.024 s	0.218	824
2,3-Anhydro-d-mannosan	1.1	71.03	XIC(71.03Â±500ppm)	86285545	4630	5573	22.9182 min, 4.888 s	0.199	864
1-Butanamine, N-butyl-	2.52	86.1	XIC(86.10Â±500ppm)	5306137	319	545	22.9182 min, 6.485 s	0.07	766
Hexanal, 3-methyl-	1.1	70.06	XIC(70.06Â±500ppm)	4348589	592	330	23.0849 min, 5.570 s	0.217	772
3-Hydroxyphenylacetylene	1.64	44.01	XIC(44.01Â±500ppm)	6753612	175	115	23.1682 min, 3.628 s	0.051	703
Propoxur	1.09	110.04	XIC(110.04Â±500ppm)	120901742	3018	3685	23.2516 min, 3.856 s	0.136	881
2,4,6-Octatriene, 2,6-dimethyl-	1.26	121.06	XIC(121.06Â±500ppm)	3748221	298	657	23.3349 min, 3.221 s	0.205	731
1H-Pyrrole-2,5-dione, 3-ethyl-4-methyl-	1.5	110.05	XIC(110.05Â±500ppm)	4356220	546	222	23.3349 min, 3.821 s	0.129	798
Isophthalaldehyde	1.14	134.05	XIC(134.05Â±500ppm)	1349460	354	327	23.3349 min, 4.978 s	0.168	801
Quinoline	2.81	129.07	XIC(129.07Â±500ppm)	37600397	1189	2383	23.4183 min, 4.435 s	0.176	940
Sulfurous acid, 2-ethylhexyl undecyl ester	2.89	57.09	XIC(57.09Â±500ppm)	4558476	329	349	23.5849 min, 1.800 s	0.131	821
Phenol, 4-ethyl-3-methyl-	1.16	121.08	XIC(121.08Â±500ppm)	21582253	2571	2738	23.5849 min, 3.300 s	0.118	867
1-Benzofuran-5-ol	1.2	134.05	XIC(134.05Â±500ppm)	73177260	2804	4309	23.5849 min, 3.981 s	0.134	897
3-Pyridinol, 2,6-dimethyl-	2.54	123.08	XIC(123.08Â±500ppm)	8333241	501	644	23.6683 min, 3.431 s	0.137	870
2,3-Dimethoxytoluene	2.04	152.1	XIC(152.10Â±500ppm)	2078825	288	590	23.6683 min, 3.602 s	0.146	732
Pentadecafluorooctanoic acid, 2-ethylhexyl ester	1.22	57.06	XIC(57.06Â±500ppm)	3100343	256	253	23.7516 min, 2.299 s	0.102	737
Benzoic acid, 2-methyl-	1.07	91.07	XIC(91.07Â±500ppm)	1697363	147	183	23.7516 min, 3.308 s	0.128	702
2,3-Methylenedioxyphenol	1.02	138.05	XIC(138.05Â±500ppm)	3381244	412	981	23.7516 min, 4.092 s	0.133	874
Benzenamine, 2,4,6-trimethyl-	2.5	135.12	XIC(135.12Â±500ppm)	1913866	316	321	23.835 min, 3.296 s	0.153	726
2(1H)-Pyridone, 6-methyl-	1.69	80.07	XIC(80.07Â±500ppm)	3171138	175	278	23.835 min, 4.164 s	0.157	745
Niacin	2.75	123.05	XIC(123.05Â±500ppm)	1893215	268	295	24.0016 min, 3.288 s	0.128	871
1,3-Di-O-acetyl-a-ÃŸ-d-ribopyranose	1.19	43.04	XIC(43.04Â±500ppm)	316468665	12005	5488	24.0016 min, 4.091 s	0.191	706
2(3H)-Benzofuranone, 3-methyl-	1.24	120.07	XIC(120.07Â±500ppm)	1614000	756	262	24.0016 min, 4.239 s	0.162	795
3,4-Anhydro-d-galactosan	1.14	43.05	XIC(43.05Â±500ppm)	9594381	481	179	24.085 min, 5.513 s	0.166	843
2-(1-Cyclopentenyl)furan	1.23	134.09	XIC(134.09Â±500ppm)	1506707	220	329	24.1683 min, 3.444 s	0.124	705
Benzeneacetic acid	2.12	91.07	XIC(91.07Â±500ppm)	27089646	1099	1736	24.1683 min, 3.488 s	0.124	890
Picolinamide	1.2	79.06	XIC(79.06Â±500ppm)	13016483	751	626	24.2517 min, 5.050 s	0.176	768
Phenol, 4-(2-propenyl)-	1.19	134.09	XIC(134.09Â±500ppm)	4277856	685	727	24.335 min, 3.431 s	0.12	879
Benzene, 1-methoxy-4-propyl-	1.16	121.04	XIC(121.04Â±500ppm)	3307727	679	795	24.335 min, 4.392 s	0.15	713
Isoquinoline	2.8	129.07	XIC(129.07Â±500ppm)	31576245	939	1632	24.335 min, 4.465 s	0.177	822
Phenol, 4-propyl-	1.18	107.06	XIC(107.06Â±500ppm)	26335441	1304	2476	24.5017 min, 3.253 s	0.112	911
1,2-Benzenediol, 3-methoxy-	1.08	140.06	XIC(140.06Â±500ppm)	105925715	2334	10699	24.5017 min, 4.040 s	0.142	916
1,3-Cyclopentanedione, 2-methyl-	0.87	112.06	XIC(112.06Â±500ppm)	47989456	574	1646	24.5017 min, 4.546 s	0.148	756
Benzonitrile, 4-amino-	1.29	118.06	XIC(118.06Â±500ppm)	2730733	446	429	24.585 min, 4.924 s	0.177	765
1H-Imidazole, 4-methyl-	2.41	82.06	XIC(82.06Â±500ppm)	1894622	144	197	24.6684 min, 2.239 s	0.111	750
2(1H)-Pyridinone, 3,6-dimethyl-	1.23	123.08	XIC(123.08Â±500ppm)	2704296	317	420	24.6684 min, 4.325 s	0.163	719
1,2-Benzenedicarbonitrile	0.68	128.05	XIC(128.05Â±500ppm)	2893547	418	499	24.6684 min, 5.626 s	0.2	709
m-Cresol, TMS derivative	1.73	180.08	XIC(180.08Â±500ppm)	17367707	1251	2413	24.7517 min, 2.534 s	0.111	702
1,2-Benzenediol, 3-methyl-	1.09	124.06	XIC(124.06Â±500ppm)	314579324	2607	8735	24.7517 min, 3.624 s	0.127	921
1-Methylpyrrolo[1,2-a]pyrazine	2.23	132.08	XIC(132.08Â±500ppm)	4103744	537	717	24.7517 min, 4.300 s	0.171	772
d-Lyxose	7.65	60.05	XIC(60.05Â±500ppm)	3586654	218	270	24.7517 min, 4.367 s	0.151	746
2-Undecene, 4,5-dimethyl-, [R*,S*-(Z)]-	1.27	71.1	XIC(71.10Â±500ppm)	1927305	261	290	24.835 min, 1.852 s	0.154	708
3-Pyridinol, 2-ethyl-6-methyl-	2	136.09	XIC(136.09Â±500ppm)	7580864	279	961	24.835 min, 3.335 s	0.173	718
Phenol, 3,4,5-trimethyl-	1.13	121.08	XIC(121.08Â±500ppm)	11292833	667	1095	24.835 min, 3.406 s	0.119	752
Benzofuran, 2,3-dihydro-2-methyl-	1.01	134.09	XIC(134.09Â±500ppm)	1597397	205	354	24.835 min, 3.551 s	0.117	708
1-Naphthalenol	1.3	144.07	XIC(144.07Â±500ppm)	1927559	195	786	24.835 min, 4.070 s	0.122	732
2,4(1H,3H)-Pyrimidinedione, dihydro-3-methyl-	0.6	43.06	XIC(43.06Â±500ppm)	17800073	527	361	24.835 min, 5.263 s	0.161	741
Methylphosphonic acid, 2TMS derivative	1.09	225.06	XIC(225.06Â±500ppm)	25696106	2040	17991	24.9184 min, 2.407 s	0.131	753
6-methyl-2-pentylpyridine	2.72	107.09	XIC(107.09Â±500ppm)	4314814	404	388	24.9184 min, 2.905 s	0.12	734
Thiophen-2-methylamine, N-decyl-N-methyl	1.15	140.06	XIC(140.06Â±500ppm)	6099118	1051	1082	24.9184 min, 3.986 s	0.293	753
Benzoyl chloride, 3-methyl-	2.44	91.07	XIC(91.07Â±500ppm)	6540839	532	514	25.0017 min, 3.308 s	0.138	715
Phenol, 2,3,6-trimethyl-	1.19	121.08	XIC(121.08Â±500ppm)	13080512	1342	1485	25.0851 min, 3.392 s	0.121	840
Ethanone, 1-(2,5-dihydroxyphenyl)-	1.1	137.04	XIC(137.04Â±500ppm)	13659294	1118	2143	25.0851 min, 3.937 s	0.135	861
1,2,4-Cyclopentanetriol	1.09	56.05	XIC(56.05Â±500ppm)	38934270	1693	1136	25.1684 min, 5.094 s	0.2	725
Benzene, 4-(2-butenyl)-1,2-dimethyl-, (E)-	1.3	145.08	XIC(145.08Â±500ppm)	1796903	461	666	25.2517 min, 3.762 s	0.156	722
1H-Inden-1-one, 2,3-dihydro-	1.4	104.07	XIC(104.07Â±500ppm)	54895180	4096	4347	25.2517 min, 4.699 s	0.172	904
1H-Indol-4-ol	1.67	133.07	XIC(133.07Â±500ppm)	7696671	739	1030	25.2517 min, 5.251 s	0.192	878
1H-Pyrrole, 1-phenyl-	1.11	143.09	XIC(143.09Â±500ppm)	2324766	597	843	25.3351 min, 3.817 s	0.131	744
2(3H)-Furanone, 3-acetyldihydro-3-methyl-	1.29	43.04	XIC(43.04Â±500ppm)	131905518	4669	2424	25.3351 min, 5.507 s	0.206	774
3-Hexanone, 5-hydroxy-2-methyl-	2.14	43.07	XIC(43.07Â±500ppm)	1648588	151	66	25.6684 min, 3.030 s	0.105	741
1H-Inden-5-ol, 2,3-dihydro-	1.38	134.09	XIC(134.09Â±500ppm)	1767926	335	323	25.6684 min, 3.593 s	0.133	830
1H-Inden-1-one, 2,3-dihydro-3-methyl-	1.37	117.08	XIC(117.08Â±500ppm)	88289436	5387	5683	25.6684 min, 4.264 s	0.177	832
Bicyclo[2.2.1]heptane, 2,2-dimethyl-3-methylene-, (1S)-	1.03	93.08	XIC(93.08Â±500ppm)	1161871	168	142	25.7518 min, 2.811 s	0.138	717
Phenol, 3-methoxy-2-methyl-	3.46	138.08	XIC(138.08Â±500ppm)	2974184	225	667	25.7518 min, 3.782 s	0.13	715
1H-Benzimidazole-2-carboxaldehyde	1.95	118.06	XIC(118.06Â±500ppm)	2938632	142	493	25.7518 min, 4.625 s	0.182	702
3-Pyridineacetonitrile	1.37	118.06	XIC(118.06Â±500ppm)	19442787	385	923	25.7518 min, 4.818 s	0.148	785
a-d-Ribopyranoside, methyl	0.82	60.05	XIC(60.05Â±500ppm)	22357566	374	774	25.8351 min, 4.141 s	0.132	762
Hexahydrofuro[3,2-b]furan-3,6-diol	1.19	86.05	XIC(86.05Â±500ppm)	125391162	4427	4980	25.8351 min, 4.627 s	0.177	896
Benzaldehyde, 2-ethyl-	1.29	134.09	XIC(134.09Â±500ppm)	21559800	1813	1931	25.9185 min, 3.571 s	0.127	758
2-Propenenitrile, 3-phenyl-, (E)-	1.66	129.07	XIC(129.07Â±500ppm)	5004486	1000	777	25.9185 min, 4.456 s	0.156	850
1,2-Benzenediol, 4-methyl-	1.13	124.06	XIC(124.06Â±500ppm)	1066554029	10933	13341	26.0018 min, 3.618 s	0.186	931
Resorcinol	1.22	110.04	XIC(110.04Â±500ppm)	5064998770	9291	20255	26.0018 min, 3.964 s	0.193	956
Ethanone, 1-(2,4-dihydroxyphenyl)-	1.32	137.04	XIC(137.04Â±500ppm)	11723074	680	1658	26.0018 min, 4.502 s	0.145	735
Indole	1.09	117.06	XIC(117.06Â±500ppm)	140012252	2378	9097	26.0018 min, 4.693 s	0.151	941
2,3-Dimethyl-pyrrolo(2,3-b)pyrazine	1.04	146.11	XIC(146.11Â±500ppm)	1279100	232	260	26.0851 min, 3.389 s	0.148	791
Propanoic acid, 2-hydroxy-, methyl ester, (Â±)-	1.41	45.06	XIC(45.06Â±500ppm)	11520460	215	598	26.0851 min, 6.128 s	0.046	780
1,4-Butanediol, 2,3-bis(methylene)-	0.12	95.06	XIC(95.06Â±500ppm)	2127653	249	133	26.2518 min, 5.888 s	0.223	705
1,2-Benzenediol, O-(2-furoyl)-O'-pentadedecafluorooctanoyl-	1.87	95.02	XIC(95.02Â±500ppm)	18246395	987	827	26.4185 min, 4.325 s	0.2	729
3,5-Dimethylphenol, TMS derivative	0.96	179.07	XIC(179.07Â±500ppm)	3268375	448	1026	26.5018 min, 2.996 s	0.113	713
2-Allylphenol	1.18	134.09	XIC(134.09Â±500ppm)	38072286	2005	3090	26.5018 min, 3.528 s	0.128	758
1H-Inden-1-one, 2,3-dihydro-2-methyl-	1.37	131.07	XIC(131.07Â±500ppm)	7578447	644	1067	26.5018 min, 4.184 s	0.152	767
Phenol, 4-ethoxy-	1.09	110.05	XIC(110.05Â±500ppm)	11450224	592	447	26.6685 min, 4.175 s	0.134	836
2-Propyn-1-ol, 3-(4-methylphenyl)-	1.14	131.07	XIC(131.07Â±500ppm)	43468495	5489	4118	26.6685 min, 4.324 s	0.156	801
2-Methyl-6-propylphenol	1.32	121.08	XIC(121.08Â±500ppm)	2371087	396	229	26.7519 min, 3.157 s	0.119	726
Benzaldehyde, 3-hydroxy-	1.18	122.05	XIC(122.05Â±500ppm)	169063602	4151	4928	26.7519 min, 4.103 s	0.142	925
5-Acetoxymethyl-2-furaldehyde	1.13	126.04	XIC(126.04Â±500ppm)	20718703	1656	2955	26.7519 min, 4.278 s	0.135	843
Hexanoic acid, anhydride	1.21	99.05	XIC(99.05Â±500ppm)	12519108	1285	1335	26.7519 min, 5.642 s	0.196	789
Bis(N-methoxy-N-methylamino)methane	1.1	74.03	XIC(74.03Â±500ppm)	12325435	110	983	26.8352 min, 5.116 s	0.329	737
Phenol, 3,5-diethyl-	1.12	135.09	XIC(135.09Â±500ppm)	5357955	812	510	26.9185 min, 3.204 s	0.114	822
1H-Benzimidazole, 2-(1-methylethyl)-	2.79	145.08	XIC(145.08Â±500ppm)	2069634	504	410	26.9185 min, 3.273 s	0.126	722
3-Methylbenzothiophene	1.38	147.06	XIC(147.06Â±500ppm)	9686733	640	1382	26.9185 min, 3.809 s	0.12	794
Carbaril	1	115.07	XIC(115.07Â±500ppm)	28026128	1024	2501	26.9185 min, 4.316 s	0.318	705
1-Decen-3-one, 5-hydroxy-4-pentyl-1-phenyl-, (E)-	1.26	131.07	XIC(131.07Â±500ppm)	60590495	948	4095	26.9185 min, 4.368 s	0.228	773
Phenol, 4-(1-methylpropyl)-	1	121.08	XIC(121.08Â±500ppm)	2597556	292	220	27.0019 min, 3.173 s	0.113	784
Phenol, 2-methyl-5-(1-methylethyl)-	1.56	135.09	XIC(135.09Â±500ppm)	1755587	314	209	27.1686 min, 3.178 s	0.132	706
1-Propanesulfonyl chloride	1.54	43.04	XIC(43.04Â±500ppm)	52038632	526	1076	27.1686 min, 5.040 s	0.246	736
1,4-Benzodioxin, 2,3-dihydro-	2.51	108.03	XIC(108.03Â±500ppm)	18835061	754	900	27.1686 min, 5.240 s	0.187	746
1,3-Benzenediol, o-propionyl-	0.72	110.05	XIC(110.05Â±500ppm)	50679278	468	1847	27.2519 min, 3.671 s	0.114	860
Salicylic acid	1.08	92.04	XIC(92.04Â±500ppm)	483502	163	73	27.3352 min, 2.981 s	0.103	817
3-Methoxy-5-methylphenol	0.64	138.08	XIC(138.08Â±500ppm)	82792013	1221	4433	27.3352 min, 3.781 s	0.13	923
Pentaerythritol	0.93	69.05	XIC(69.05Â±500ppm)	13149359	492	438	27.3352 min, 5.704 s	0.217	742
Benzoic acid, 4-(1-methylethyl)-	1.05	105.05	XIC(105.05Â±500ppm)	4761042	381	421	27.4186 min, 3.697 s	0.113	737
1,4-Diacetyl-3-acetoxymethyl-2,5-methylene-l-rhamnitol	1.03	43.04	XIC(43.04Â±500ppm)	57963793	599	575	27.4186 min, 4.068 s	0.147	715
Carvenone	1.79	110.08	XIC(110.08Â±500ppm)	39175346	2488	1538	27.4186 min, 4.570 s	0.188	796
(1H)Pyrrole-3-carbonitrile, 2-methyl-	1.41	105.06	XIC(105.06Â±500ppm)	6468949	763	450	27.4186 min, 5.052 s	0.184	768
2,5,6-Trimethylbenzimidazole	1.73	160.1	XIC(160.10Â±500ppm)	2151766	492	826	27.5019 min, 3.309 s	0.125	704
1,4-benzenediol, 2-methyl-, 4-acetate	1.12	124.06	XIC(124.06Â±500ppm)	60536983	1345	4075	27.6686 min, 3.793 s	0.139	822
1H-Indenol	1.19	132.07	XIC(132.07Â±500ppm)	54317874	1850	3900	27.6686 min, 4.125 s	0.141	888
1,3-Benzenediol, 2-methyl-	1.19	124.06	XIC(124.06Â±500ppm)	252364543	3231	8140	27.7519 min, 4.071 s	0.155	926
3-Butylisobenzofuran-1(3H)-one	1.33	133.04	XIC(133.04Â±500ppm)	3918589	525	544	27.7519 min, 4.733 s	0.16	744
Ethyne, fluoro-	11.38	44.01	XIC(44.01Â±500ppm)	17957944	339	410	27.8353 min, 1.714 s	0.274	715
Bicyclo[2.2.2]oct-7-ene-2,5-dione	1.43	136.07	XIC(136.07Â±500ppm)	1895801	296	279	27.8353 min, 5.786 s	0.206	719
Hydrocinnamic acid	1.21	91.07	XIC(91.07Â±500ppm)	25448831	1131	1303	27.9186 min, 3.476 s	0.122	893
Benzamide	1.64	77.05	XIC(77.05Â±500ppm)	18535469	521	650	27.9186 min, 5.247 s	0.172	854
2,2'-Difluorobiphenyl	1.04	190.08	XIC(190.08Â±500ppm)	1196534	525	979	28.002 min, 3.198 s	0.106	720
Isoquinoline, 1-methyl-	2.84	143.09	XIC(143.09Â±500ppm)	30459555	2346	2169	28.002 min, 4.244 s	0.166	905
Cyclohexanecarboxylic acid, 3-methylene-2-oxo-, methyl ester	1.34	136.05	XIC(136.05Â±500ppm)	16745970	931	1267	28.002 min, 5.876 s	0.213	729
2-Hydroxy-3-methoxyacetophenone	1.5	151.04	XIC(151.04Â±500ppm)	551030	226	204	28.0853 min, 1.791 s	0.076	726
1-Vinylbenz(c)imidazole	2.73	144.08	XIC(144.08Â±500ppm)	3739069	493	628	28.0853 min, 4.314 s	0.185	786
2-Methyl-5-hydroxybenzofuran	1.11	147.06	XIC(147.06Â±500ppm)	82819467	1351	4245	28.1686 min, 3.943 s	0.141	838
Resorcinol, 2TMS derivative	1.06	239.08	XIC(239.08Â±500ppm)	2196908	500	2504	28.252 min, 2.378 s	0.12	716
2,5-Monomethylene-l-rhamnitol	1.6	45.06	XIC(45.06Â±500ppm)	154514027	1292	2803	28.252 min, 4.350 s	0.145	762
1(3H)-Isobenzofuranone	1.32	105.04	XIC(105.04Â±500ppm)	55265818	2465	2222	28.252 min, 5.443 s	0.192	951
4-Ethylcatechol	1.1	123.06	XIC(123.06Â±500ppm)	113177682	3749	3465	28.3353 min, 3.566 s	0.123	863
Phenol, 2-(1-methylpropyl)-	1.49	121.08	XIC(121.08Â±500ppm)	8021268	1275	941	28.4187 min, 3.208 s	0.128	765
1,4-Benzenediol, 2-methyl-	1.48	124.06	XIC(124.06Â±500ppm)	725115475	5608	12673	28.4187 min, 4.168 s	0.196	907
2-Pentanone	1.12	43.04	XIC(43.04Â±500ppm)	115902356	2606	1505	28.502 min, 5.346 s	0.193	790
Disulfide, di-tert-dodecyl	0.91	71.1	XIC(71.10Â±500ppm)	15713244	203	875	28.5853 min, 1.888 s	0.169	734
2-Ethyl-4-methylanisole	1.16	135.09	XIC(135.09Â±500ppm)	7377793	772	698	28.5853 min, 3.331 s	0.132	798
o-Tolylacetic acid	0.44	105.08	XIC(105.08Â±500ppm)	2787249	201	222	28.5853 min, 3.559 s	0.13	764
Orcinol	1.28	124.06	XIC(124.06Â±500ppm)	498167253	4442	8893	28.6687 min, 4.061 s	0.153	883
1,3-Benzenediol, 2,5-dimethyl-	1.11	138.08	XIC(138.08Â±500ppm)	146089576	3255	6295	28.752 min, 3.610 s	0.132	854
3-Allyl-6-methoxyphenol	1.24	164.1	XIC(164.10Â±500ppm)	9771495	1606	1930	28.8354 min, 3.471 s	0.122	776
1-Naphthalenol, 5,8-dihydro-	1.17	131.06	XIC(131.06Â±500ppm)	3439285	206	315	28.8354 min, 3.786 s	0.123	793
3,4-Dimethoxyphenol, 2-methylpropionate	1.12	154.08	XIC(154.08Â±500ppm)	68735501	1815	3220	28.8354 min, 3.872 s	0.132	741
D-erythro-Pentose, 2-deoxy-	1.87	45.06	XIC(45.06Â±500ppm)	54575906	783	1078	28.8354 min, 4.106 s	0.133	710
Isosorbide	1.3	86.05	XIC(86.05Â±500ppm)	138964463	1027	4291	28.8354 min, 4.673 s	0.148	893
Phenol, 2-butyl-	1.25	107.06	XIC(107.06Â±500ppm)	15133050	890	780	28.9187 min, 3.213 s	0.106	837
Dinocap	2.89	69.05	XIC(69.05Â±500ppm)	9716763	455	526	28.9187 min, 3.886 s	0.189	785
2-Butanoyl-5-methylfuran	0.24	43.04	XIC(43.04Â±500ppm)	24048517	716	550	28.9187 min, 5.038 s	0.262	717
9-Decenoic acid	1.03	55.08	XIC(55.08Â±500ppm)	1289904	103	83	29.002 min, 2.543 s	0.087	841
Methyl propyl ether	1.31	45.06	XIC(45.06Â±500ppm)	14440283	415	629	29.002 min, 6.112 s	0.046	804
Succinic acid, 4-chloro-3-methylphenyl 4-methoxybenzyl ester	1.56	121.08	XIC(121.08Â±500ppm)	5297576	294	509	29.0854 min, 3.322 s	0.115	751
Phenol, 2-ethyl-4,5-dimethyl-	1.29	135.1	XIC(135.10Â±500ppm)	5472929	547	592	29.0854 min, 3.346 s	0.115	859
Benzene, pentamethyl-	1.03	133.08	XIC(133.08Â±500ppm)	2488654	234	375	29.0854 min, 3.727 s	0.125	719
[truncated: 875 more rows]

[truncated: 20 more sheets: Morus spp (PTFE14), Pithecellobium spp (PTFE15), Shorea spp (PTFE16), Solanum melongena (PTFE17), Ficus religiosa (PTFE18), Syzygium spp (PTFE21), Ficus spp (PTFE22), Vachellia spp (PTFE23), Dalbergia sissoo (PTFE24), Ricinus spp (PTFE25), Holoptelea spp (PTFE26), Sawdust (PTFE29), Saraca indica (PTFE30), Cow dung cake kikar mx (PTFE31), Cow dung cake (PTFE32), Cow dung cake (PTFE33), MSW (PTFE34), MSW (PTFE35), MSW (PTFE36), Sheet28]
