# Supplementary material for: Emissions of intermediate-volatility and semi-volatile organic compounds from domestic fuels used in Delhi, India
Source: Copernicus journal article supplement (doi:10.5194/acp-21-2407-2021), 2021-02-18
Supplement: Supplementary file [file acp-21-2407-2021-supplement-title-page.pdf › acp-21-2407-2021-supplement-title-page.pdf]

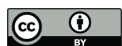

## *Supplement of*

# **Emissions of intermediate-volatility and semi-volatile organic compounds from domestic fuels used in Delhi, India**

**Gareth J. Stewart et al.**

*Correspondence to:* Jacqueline F. Hamilton ([jacqui.hamilton@york.ac.uk](mailto:jacqui.hamilton@york.ac.uk))

- [acp-21-2407-2021-supplement-title-page.pdf](#)
- Supplement
  - ISVOC paper supplement.pdf
  - S7 - SPE supplement blank corrected table.xlsx
  - S8 - PTFE supplement blank corrected table.xlsx

The copyright of individual parts of the supplement might differ from the CC BY 4.0 License.
